# Supplementary material for: Combining autophagy and immune characterizations to predict prognosis and therapeutic response in lung adenocarcinoma
Source: Front Immunol. 2022 Sep 13;13:944378. doi: 10.3389/fimmu.2022.944378 (PMC9513242; doi:10.3389/fimmu.2022.944378)
Supplement: Supplementary file 8 [file Table_1.xlsx]

## Sheet: Sheet1
Supplementary Table 1
Essential autophagy-related genes	Immune-related genes	HLA genes' family	Ferroptosis-related genes
ATG2A	CD27	HLA-B	ALOX15
ATG3	CD40	HLA-C	ZEB1
ATG4A	CD80	HLA-DMA	HMGB1
ATG4B	ICOS	HLA-DMB	HMOX1
ATG4C	TNFRSF4	HLA-DOA	ACSL4
ATG5	TNFRSF9	HLA-DOB	ALOX5
ATG7	CD14	HLA-DPA1	KEAP1
ATG12	CD33	HLA-DPB1	MYB
ATG13	CD63	HLA-DQA1	NCOA4
ATG16L1	CD163	HLA-DQB1	FADS2
ATG16L2	NOS2	HLA-DQB2	TP53
	OLR1	HLA-DRA	SRC
	JAK2	HLA-E	LC7A11
	IRF1	HLA-F	OTUB1
	IRF2	HLA-G	ZFP36
	JAK2		AKR12
	IRF1		NQO1
	IRF2		CA9
	GBP4		ACSL3
	GBP5
	CXCL9
	CXCL10
	IDO1
	IFNG
	STAT1
	CD3E
	CD4
	TBX21
	FOXP3
	CD8B
	PRF1
	GZMB
	ENTPD1
	NT5E
