# Supplementary material for: Combining autophagy and immune characterizations to predict prognosis and therapeutic response in lung adenocarcinoma
Source: Front Immunol. 2022 Sep 13;13:944378. doi: 10.3389/fimmu.2022.944378 (PMC9513242; doi:10.3389/fimmu.2022.944378)
Supplement: Supplementary file 9 [file Table_2.xlsx]

## Sheet: Sheet1
Supplemental Table 3 Primer sequences
C4BPA	F primer (5′-3′)	GGTCGGACAGGCGAAACTCT
	R primer (5′-3′)	AACCACACCATAGCCAGAATCA
CD300LG	F primer (5′-3′)	CGCTCATTGTGACCCTGTGG
	R primer (5′-3′)	AGGCGTGTTGTAGCCAGAGG
CD96	F primer (5′-3′)	TCTTGCCACATTAGAGTCGGTC
	R primer (5′-3′)	TACCAAGACATCCGTGGAGTTAT
S100P	F primer (5′-3′)	ATGGAGAAGGAGCTACCAGGC
	R primer (5′-3′)	CACTATGAACTCACTGAAGTCCACCT
GADPH	F primer (5′-3′)	GGAAGCTTGTCATCAATGGAAATC
	R primer (5′-3′)	TGATGACCCTTTTGGCTCCC
