# Supplementary material for: Combining autophagy and immune characterizations to predict prognosis and therapeutic response in lung adenocarcinoma
Source: Front Immunol. 2022 Sep 13;13:944378. doi: 10.3389/fimmu.2022.944378 (PMC9513242; doi:10.3389/fimmu.2022.944378)
Supplement: Supplementary file 10 [file Table_3.xlsx]

## Sheet: gsea_report_for_AutCluser A
NAME	GS<br> follow link to MSigDB	SIZE	ES	NES	NOM p-val	FDR q-val	FWER p-val	RANK AT MAX	LEADING EDGE	Column1
HALLMARK_INFLAMMATORY_RESPONSE	HALLMARK_INFLAMMATORY_RESPONSE	196	0.668974	1.7968	0	0.224883	0.122	3460	tags=63%, list=23%, signal=81%
HALLMARK_IL6_JAK_STAT3_SIGNALING	HALLMARK_IL6_JAK_STAT3_SIGNALING	87	0.66739	1.75976	0.00608519	0.146104	0.148	3276	tags=61%, list=21%, signal=77%
HALLMARK_COMPLEMENT	HALLMARK_COMPLEMENT	191	0.547502	1.75611	0.0040568	0.0984761	0.149	4009	tags=51%, list=26%, signal=68%
HALLMARK_TGF_BETA_SIGNALING	HALLMARK_TGF_BETA_SIGNALING	54	0.474834	1.74546	0.0464135	0.0832015	0.17	3977	tags=33%, list=26%, signal=45%
HALLMARK_IL2_STAT5_SIGNALING	HALLMARK_IL2_STAT5_SIGNALING	193	0.525157	1.71223	0.0106383	0.0894049	0.204	3479	tags=50%, list=23%, signal=64%
HALLMARK_APOPTOSIS	HALLMARK_APOPTOSIS	156	0.466996	1.71157	0.0145228	0.0747084	0.204	4757	tags=49%, list=31%, signal=70%
HALLMARK_UV_RESPONSE_DN	HALLMARK_UV_RESPONSE_DN	136	0.490081	1.68057	0.0171306	0.0833935	0.244	4780	tags=55%, list=31%, signal=79%
HALLMARK_KRAS_SIGNALING_UP	HALLMARK_KRAS_SIGNALING_UP	191	0.553534	1.67266	0	0.0773273	0.25	4032	tags=59%, list=26%, signal=79%
HALLMARK_ALLOGRAFT_REJECTION	HALLMARK_ALLOGRAFT_REJECTION	191	0.673553	1.64552	0.028866	0.0864899	0.301	3144	tags=62%, list=20%, signal=77%
HALLMARK_INTERFERON_GAMMA_RESPONSE	HALLMARK_INTERFERON_GAMMA_RESPONSE	192	0.617465	1.63079	0.041841	0.0871813	0.328	3734	tags=60%, list=24%, signal=79%
HALLMARK_APICAL_JUNCTION	HALLMARK_APICAL_JUNCTION	191	0.469642	1.61329	0.0121704	0.0888098	0.356	4455	tags=42%, list=29%, signal=59%
HALLMARK_MYOGENESIS	HALLMARK_MYOGENESIS	196	0.540959	1.60891	0.0119284	0.0831429	0.361	2538	tags=35%, list=17%, signal=42%
HALLMARK_P53_PATHWAY	HALLMARK_P53_PATHWAY	187	0.40139	1.57732	0.0181087	0.0927832	0.402	3888	tags=39%, list=25%, signal=51%
HALLMARK_TNFA_SIGNALING_VIA_NFKB	HALLMARK_TNFA_SIGNALING_VIA_NFKB	192	0.586821	1.56177	0.0647182	0.097254	0.424	4710	tags=66%, list=31%, signal=94%
HALLMARK_ADIPOGENESIS	HALLMARK_ADIPOGENESIS	185	0.344359	1.55317	0.0386965	0.0961389	0.436	2328	tags=14%, list=15%, signal=16%
HALLMARK_INTERFERON_ALPHA_RESPONSE	HALLMARK_INTERFERON_ALPHA_RESPONSE	92	0.614371	1.50617	0.0952381	0.119819	0.522	3994	tags=61%, list=26%, signal=82%
HALLMARK_COAGULATION	HALLMARK_COAGULATION	135	0.494041	1.48545	0.0276008	0.128	0.56	3333	tags=43%, list=22%, signal=54%
HALLMARK_NOTCH_SIGNALING	HALLMARK_NOTCH_SIGNALING	32	0.459789	1.48053	0.0675381	0.124135	0.568	4889	tags=44%, list=32%, signal=64%
HALLMARK_HEME_METABOLISM	HALLMARK_HEME_METABOLISM	188	0.340198	1.47602	0.0260521	0.120286	0.572	4824	tags=39%, list=31%, signal=57%
HALLMARK_HEDGEHOG_SIGNALING	HALLMARK_HEDGEHOG_SIGNALING	35	0.516427	1.4362	0.0593047	0.14195	0.635	4179	tags=43%, list=27%, signal=59%
HALLMARK_BILE_ACID_METABOLISM	HALLMARK_BILE_ACID_METABOLISM	112	0.454868	1.42881	0.0550098	0.140765	0.65	4110	tags=42%, list=27%, signal=57%
HALLMARK_APICAL_SURFACE	HALLMARK_APICAL_SURFACE	43	0.493966	1.41566	0.0529532	0.145646	0.673	3741	tags=47%, list=24%, signal=61%
HALLMARK_ANGIOGENESIS	HALLMARK_ANGIOGENESIS	36	0.497223	1.37794	0.103376	0.166492	0.719	4906	tags=56%, list=32%, signal=81%
HALLMARK_EPITHELIAL_MESENCHYMAL_TRANSITION	HALLMARK_EPITHELIAL_MESENCHYMAL_TRANSITION	193	0.466566	1.21567	0.297571	0.321747	0.896	4034	tags=45%, list=26%, signal=60%
HALLMARK_XENOBIOTIC_METABOLISM	HALLMARK_XENOBIOTIC_METABOLISM	193	0.355632	1.15912	0.248106	0.381395	0.933	3981	tags=35%, list=26%, signal=47%
HALLMARK_UV_RESPONSE_UP	HALLMARK_UV_RESPONSE_UP	151	0.296797	1.14977	0.222441	0.378962	0.937	2236	tags=17%, list=15%, signal=20%
HALLMARK_ESTROGEN_RESPONSE_EARLY	HALLMARK_ESTROGEN_RESPONSE_EARLY	192	0.308605	1.09738	0.29666	0.436884	0.955	3964	tags=31%, list=26%, signal=41%
HALLMARK_KRAS_SIGNALING_DN	HALLMARK_KRAS_SIGNALING_DN	184	0.364218	1.08516	0.255238	0.438097	0.958	3521	tags=33%, list=23%, signal=42%
HALLMARK_ANDROGEN_RESPONSE	HALLMARK_ANDROGEN_RESPONSE	95	0.273498	1.07509	0.354508	0.435951	0.96	4930	tags=36%, list=32%, signal=52%
HALLMARK_PI3K_AKT_MTOR_SIGNALING	HALLMARK_PI3K_AKT_MTOR_SIGNALING	103	0.236636	1.03994	0.388548	0.472437	0.97	3203	tags=17%, list=21%, signal=22%
HALLMARK_FATTY_ACID_METABOLISM	HALLMARK_FATTY_ACID_METABOLISM	150	0.250582	0.94704	0.540797	0.593178	0.985	2173	tags=12%, list=14%, signal=14%
HALLMARK_REACTIVE_OXYGEN_SPECIES_PATHWAY	HALLMARK_REACTIVE_OXYGEN_SPECIES_PATHWAY	44	0.273243	0.934279	0.543307	0.595992	0.989	2822	tags=20%, list=18%, signal=25%
HALLMARK_PROTEIN_SECRETION	HALLMARK_PROTEIN_SECRETION	95	0.176249	0.932096	0.522358	0.580864	0.989	4907	tags=27%, list=32%, signal=40%
HALLMARK_CHOLESTEROL_HOMEOSTASIS	HALLMARK_CHOLESTEROL_HOMEOSTASIS	69	0.250015	0.914598	0.531313	0.59231	0.991	4691	tags=32%, list=31%, signal=46%
HALLMARK_WNT_BETA_CATENIN_SIGNALING	HALLMARK_WNT_BETA_CATENIN_SIGNALING	41	0.275768	0.897413	0.584034	0.601506	0.992	5125	tags=37%, list=33%, signal=55%
HALLMARK_ESTROGEN_RESPONSE_LATE	HALLMARK_ESTROGEN_RESPONSE_LATE	191	0.265018	0.886081	0.665354	0.603097	0.994	3259	tags=26%, list=21%, signal=32%
HALLMARK_PEROXISOME	HALLMARK_PEROXISOME	102	0.221348	0.86497	0.676829	0.618265	0.995	4313	tags=27%, list=28%, signal=38%
HALLMARK_HYPOXIA	HALLMARK_HYPOXIA	190	0.236153	0.830324	0.663934	0.653751	0.996	3471	tags=27%, list=23%, signal=34%
GOBP_REGULATION_OF_RESPONSE_TO_CYTOKINE_STIMULUS	GOBP_REGULATION_OF_RESPONSE_TO_CYTOKINE_STIMULUS	142	0.539669	1.95211	0	1	0.351	2966	tags=33%, list=19%, signal=41%
GOBP_IMMUNE_RESPONSE_REGULATING_SIGNALING_PATHWAY	GOBP_IMMUNE_RESPONSE_REGULATING_SIGNALING_PATHWAY	360	0.644677	1.94541	0	1	0.371	3109	tags=48%, list=20%, signal=59%
GOBP_REGULATION_OF_CALCIUM_MEDIATED_SIGNALING	GOBP_REGULATION_OF_CALCIUM_MEDIATED_SIGNALING	68	0.685829	1.93142	0	0.810564	0.41	3403	tags=56%, list=22%, signal=71%
GOBP_ACTIVATION_OF_IMMUNE_RESPONSE	GOBP_ACTIVATION_OF_IMMUNE_RESPONSE	278	0.65807	1.9307	0	0.615306	0.415	3160	tags=50%, list=21%, signal=62%
GOBP_NEGATIVE_REGULATION_OF_ATP_METABOLIC_PROCESS	GOBP_NEGATIVE_REGULATION_OF_ATP_METABOLIC_PROCESS	26	0.608643	1.92399	0	0.526439	0.436	1978	tags=23%, list=13%, signal=26%
GOBP_REGULATION_OF_VACUOLE_ORGANIZATION	GOBP_REGULATION_OF_VACUOLE_ORGANIZATION	48	0.434668	1.91935	0.00200401	0.45739	0.45	2846	tags=23%, list=19%, signal=28%
GOBP_CALCIUM_MEDIATED_SIGNALING	GOBP_CALCIUM_MEDIATED_SIGNALING	181	0.656404	1.90754	0	0.443729	0.494	3057	tags=49%, list=20%, signal=61%
GOBP_FC_RECEPTOR_SIGNALING_PATHWAY	GOBP_FC_RECEPTOR_SIGNALING_PATHWAY	49	0.679321	1.90707	0	0.390988	0.495	2945	tags=49%, list=19%, signal=60%
GOBP_TUMOR_NECROSIS_FACTOR_SUPERFAMILY_CYTOKINE_PRODUCTION	GOBP_TUMOR_NECROSIS_FACTOR_SUPERFAMILY_CYTOKINE_PRODUCTION	155	0.66908	1.90644	0	0.348264	0.495	2953	tags=54%, list=19%, signal=66%
GOBP_VASCULAR_ENDOTHELIAL_CELL_PROLIFERATION	GOBP_VASCULAR_ENDOTHELIAL_CELL_PROLIFERATION	20	0.741884	1.90328	0	0.32436	0.503	2335	tags=40%, list=15%, signal=47%
GOBP_REGULATION_OF_GTPASE_ACTIVITY	GOBP_REGULATION_OF_GTPASE_ACTIVITY	323	0.484687	1.90067	0	0.302376	0.509	4215	tags=46%, list=27%, signal=61%
GOBP_PATTERN_RECOGNITION_RECEPTOR_SIGNALING_PATHWAY	GOBP_PATTERN_RECOGNITION_RECEPTOR_SIGNALING_PATHWAY	156	0.587891	1.89887	0.00203666	0.280772	0.514	4135	tags=51%, list=27%, signal=69%
GOBP_INTERLEUKIN_6_PRODUCTION	GOBP_INTERLEUKIN_6_PRODUCTION	135	0.665637	1.89657	0	0.266152	0.524	3098	tags=58%, list=20%, signal=72%
GOBP_REGULATION_OF_NIK_NF_KAPPAB_SIGNALING	GOBP_REGULATION_OF_NIK_NF_KAPPAB_SIGNALING	91	0.616951	1.89621	0.0020284	0.247939	0.524	2788	tags=41%, list=18%, signal=49%
GOBP_NEGATIVE_REGULATION_OF_IMMUNE_RESPONSE	GOBP_NEGATIVE_REGULATION_OF_IMMUNE_RESPONSE	161	0.615891	1.89587	0	0.232538	0.526	3160	tags=46%, list=21%, signal=57%
GOBP_NEGATIVE_REGULATION_OF_RESPONSE_TO_BIOTIC_STIMULUS	GOBP_NEGATIVE_REGULATION_OF_RESPONSE_TO_BIOTIC_STIMULUS	98	0.567625	1.89359	0	0.222308	0.532	4482	tags=52%, list=29%, signal=73%
GOBP_POSITIVE_REGULATION_OF_GTPASE_ACTIVITY	GOBP_POSITIVE_REGULATION_OF_GTPASE_ACTIVITY	237	0.500121	1.89189	0	0.213381	0.536	4215	tags=49%, list=27%, signal=66%
GOBP_SMALL_GTPASE_MEDIATED_SIGNAL_TRANSDUCTION	GOBP_SMALL_GTPASE_MEDIATED_SIGNAL_TRANSDUCTION	471	0.451041	1.89155	0	0.202088	0.539	4168	tags=42%, list=27%, signal=56%
GOBP_NEGATIVE_REGULATION_OF_DEFENSE_RESPONSE	GOBP_NEGATIVE_REGULATION_OF_DEFENSE_RESPONSE	203	0.580407	1.88947	0	0.195414	0.542	2927	tags=40%, list=19%, signal=49%
GOBP_REGULATION_OF_SMALL_GTPASE_MEDIATED_SIGNAL_TRANSDUCTION	GOBP_REGULATION_OF_SMALL_GTPASE_MEDIATED_SIGNAL_TRANSDUCTION	284	0.481101	1.88821	0	0.188253	0.548	4236	tags=48%, list=28%, signal=65%
GOBP_POSITIVE_REGULATION_OF_CELL_ADHESION	GOBP_POSITIVE_REGULATION_OF_CELL_ADHESION	407	0.595933	1.88817	0	0.179438	0.548	3382	tags=50%, list=22%, signal=62%
GOBP_CYTOPLASMIC_PATTERN_RECOGNITION_RECEPTOR_SIGNALING_PATHWAY	GOBP_CYTOPLASMIC_PATTERN_RECOGNITION_RECEPTOR_SIGNALING_PATHWAY	50	0.551619	1.8842	0.00809717	0.179549	0.559	2323	tags=30%, list=15%, signal=35%
GOBP_PHAGOCYTOSIS	GOBP_PHAGOCYTOSIS	216	0.596456	1.8841	0.00199601	0.171876	0.559	3320	tags=50%, list=22%, signal=63%
GOBP_RAS_PROTEIN_SIGNAL_TRANSDUCTION	GOBP_RAS_PROTEIN_SIGNAL_TRANSDUCTION	325	0.442506	1.88352	0	0.165602	0.561	3931	tags=39%, list=26%, signal=52%
GOBP_POSITIVE_REGULATION_OF_IMMUNE_RESPONSE	GOBP_POSITIVE_REGULATION_OF_IMMUNE_RESPONSE	456	0.624054	1.88257	0	0.161037	0.565	3132	tags=47%, list=20%, signal=58%
GOBP_I_KAPPAB_KINASE_NF_KAPPAB_SIGNALING	GOBP_I_KAPPAB_KINASE_NF_KAPPAB_SIGNALING	258	0.502775	1.88135	0	0.156672	0.568	4140	tags=40%, list=27%, signal=54%
GOBP_NEGATIVE_REGULATION_OF_AUTOPHAGY	GOBP_NEGATIVE_REGULATION_OF_AUTOPHAGY	79	0.470284	1.88098	0	0.151471	0.569	2293	tags=20%, list=15%, signal=24%
GOBP_IMMUNE_RESPONSE_REGULATING_CELL_SURFACE_RECEPTOR_SIGNALING_PATHWAY	GOBP_IMMUNE_RESPONSE_REGULATING_CELL_SURFACE_RECEPTOR_SIGNALING_PATHWAY	225	0.680201	1.88042	0	0.1466	0.569	2605	tags=48%, list=17%, signal=57%
GOBP_INOSITOL_PHOSPHATE_MEDIATED_SIGNALING	GOBP_INOSITOL_PHOSPHATE_MEDIATED_SIGNALING	53	0.644145	1.87617	0	0.147459	0.59	3403	tags=51%, list=22%, signal=65%
GOBP_CALCINEURIN_MEDIATED_SIGNALING	GOBP_CALCINEURIN_MEDIATED_SIGNALING	43	0.646083	1.87553	0	0.143561	0.594	3403	tags=47%, list=22%, signal=60%
GOBP_POSITIVE_REGULATION_OF_EPITHELIAL_CELL_MIGRATION	GOBP_POSITIVE_REGULATION_OF_EPITHELIAL_CELL_MIGRATION	137	0.555039	1.87262	0	0.14296	0.605	3409	tags=42%, list=22%, signal=53%
GOBP_AUTOPHAGOSOME_ORGANIZATION	GOBP_AUTOPHAGOSOME_ORGANIZATION	95	0.35642	1.86906	0.00612245	0.14326	0.618	4584	tags=24%, list=30%, signal=34%
GOBP_FC_EPSILON_RECEPTOR_SIGNALING_PATHWAY	GOBP_FC_EPSILON_RECEPTOR_SIGNALING_PATHWAY	24	0.713702	1.86856	0	0.139596	0.622	2945	tags=50%, list=19%, signal=62%
GOBP_POSITIVE_REGULATION_OF_ENDOTHELIAL_CELL_MIGRATION	GOBP_POSITIVE_REGULATION_OF_ENDOTHELIAL_CELL_MIGRATION	96	0.583644	1.86542	0	0.139156	0.634	3409	tags=43%, list=22%, signal=55%
GOBP_REGULATION_OF_ENDOTHELIAL_CELL_MIGRATION	GOBP_REGULATION_OF_ENDOTHELIAL_CELL_MIGRATION	155	0.563774	1.86464	0	0.136013	0.636	3409	tags=44%, list=22%, signal=56%
GOBP_CHEMOKINE_PRODUCTION	GOBP_CHEMOKINE_PRODUCTION	88	0.672459	1.86401	0	0.133054	0.638	3098	tags=55%, list=20%, signal=68%
GOBP_REGULATION_OF_VASCULATURE_DEVELOPMENT	GOBP_REGULATION_OF_VASCULATURE_DEVELOPMENT	253	0.580277	1.864	0	0.129458	0.638	3288	tags=46%, list=21%, signal=57%
GOBP_TOLL_LIKE_RECEPTOR_SIGNALING_PATHWAY	GOBP_TOLL_LIKE_RECEPTOR_SIGNALING_PATHWAY	112	0.613578	1.86166	0.00203252	0.12884	0.642	3109	tags=45%, list=20%, signal=56%
GOBP_REGULATION_OF_CALCINEURIN_MEDIATED_SIGNALING	GOBP_REGULATION_OF_CALCINEURIN_MEDIATED_SIGNALING	34	0.673021	1.86164	0	0.125536	0.642	3403	tags=50%, list=22%, signal=64%
GOBP_POSITIVE_REGULATION_OF_VASCULATURE_DEVELOPMENT	GOBP_POSITIVE_REGULATION_OF_VASCULATURE_DEVELOPMENT	145	0.604785	1.86039	0	0.123693	0.645	3288	tags=48%, list=21%, signal=60%
GOBP_REGULATION_OF_PATTERN_RECOGNITION_RECEPTOR_SIGNALING_PATHWAY	GOBP_REGULATION_OF_PATTERN_RECOGNITION_RECEPTOR_SIGNALING_PATHWAY	88	0.588295	1.85969	0.0019802	0.121526	0.649	3109	tags=41%, list=20%, signal=51%
GOBP_REGULATION_OF_MONONUCLEAR_CELL_MIGRATION	GOBP_REGULATION_OF_MONONUCLEAR_CELL_MIGRATION	100	0.65941	1.85944	0.00203666	0.118934	0.649	3035	tags=55%, list=20%, signal=68%
GOBP_NEGATIVE_REGULATION_OF_SMALL_GTPASE_MEDIATED_SIGNAL_TRANSDUCTION	GOBP_NEGATIVE_REGULATION_OF_SMALL_GTPASE_MEDIATED_SIGNAL_TRANSDUCTION	53	0.559287	1.85932	0	0.11627	0.649	3308	tags=43%, list=22%, signal=55%
GOBP_NEGATIVE_REGULATION_OF_IMMUNE_EFFECTOR_PROCESS	GOBP_NEGATIVE_REGULATION_OF_IMMUNE_EFFECTOR_PROCESS	106	0.678511	1.85755	0	0.115546	0.651	3160	tags=58%, list=21%, signal=72%
GOBP_NEGATIVE_REGULATION_OF_INTERLEUKIN_6_PRODUCTION	GOBP_NEGATIVE_REGULATION_OF_INTERLEUKIN_6_PRODUCTION	43	0.769176	1.8565	0.00200803	0.114362	0.659	2927	tags=77%, list=19%, signal=95%
GOBP_ANTIGEN_RECEPTOR_MEDIATED_SIGNALING_PATHWAY	GOBP_ANTIGEN_RECEPTOR_MEDIATED_SIGNALING_PATHWAY	155	0.683949	1.85593	0.00398406	0.112626	0.659	2605	tags=48%, list=17%, signal=57%
GOBP_POSITIVE_REGULATION_OF_CALCIUM_MEDIATED_SIGNALING	GOBP_POSITIVE_REGULATION_OF_CALCIUM_MEDIATED_SIGNALING	31	0.717356	1.85413	0	0.112338	0.666	3403	tags=58%, list=22%, signal=74%
GOBP_LEUKOCYTE_CELL_CELL_ADHESION	GOBP_LEUKOCYTE_CELL_CELL_ADHESION	337	0.636552	1.85409	0	0.11011	0.666	3090	tags=52%, list=20%, signal=64%
GOBP_NIK_NF_KAPPAB_SIGNALING	GOBP_NIK_NF_KAPPAB_SIGNALING	117	0.565934	1.85375	0.004	0.108209	0.67	3109	tags=39%, list=20%, signal=49%
GOBP_INTEGRIN_MEDIATED_SIGNALING_PATHWAY	GOBP_INTEGRIN_MEDIATED_SIGNALING_PATHWAY	99	0.601402	1.85256	0.00204499	0.107329	0.671	3587	tags=47%, list=23%, signal=62%
GOBP_REGULATION_OF_OXIDOREDUCTASE_ACTIVITY	GOBP_REGULATION_OF_OXIDOREDUCTASE_ACTIVITY	87	0.547211	1.85247	0	0.10527	0.671	2783	tags=33%, list=18%, signal=40%
GOBP_NEGATIVE_REGULATION_OF_IMMUNE_SYSTEM_PROCESS	GOBP_NEGATIVE_REGULATION_OF_IMMUNE_SYSTEM_PROCESS	365	0.606961	1.85247	0	0.103245	0.671	3119	tags=48%, list=20%, signal=58%
GOBP_POSITIVE_REGULATION_OF_I_KAPPAB_KINASE_NF_KAPPAB_SIGNALING	GOBP_POSITIVE_REGULATION_OF_I_KAPPAB_KINASE_NF_KAPPAB_SIGNALING	173	0.484211	1.85194	0.00396825	0.102075	0.674	4140	tags=40%, list=27%, signal=55%
GOBP_POSITIVE_REGULATION_OF_TUMOR_NECROSIS_FACTOR_SUPERFAMILY_CYTOKINE_PRODUCTION	GOBP_POSITIVE_REGULATION_OF_TUMOR_NECROSIS_FACTOR_SUPERFAMILY_CYTOKINE_PRODUCTION	97	0.648386	1.84875	0.00204082	0.10353	0.687	2605	tags=47%, list=17%, signal=57%
GOBP_NEGATIVE_REGULATION_OF_INFLAMMATORY_RESPONSE	GOBP_NEGATIVE_REGULATION_OF_INFLAMMATORY_RESPONSE	130	0.615715	1.84594	0	0.104102	0.693	2927	tags=45%, list=19%, signal=56%
GOBP_POSITIVE_REGULATION_OF_NF_KAPPAB_TRANSCRIPTION_FACTOR_ACTIVITY	GOBP_POSITIVE_REGULATION_OF_NF_KAPPAB_TRANSCRIPTION_FACTOR_ACTIVITY	144	0.562566	1.84492	0.00396825	0.103342	0.698	3136	tags=40%, list=20%, signal=50%
GOBP_T_CELL_PROLIFERATION	GOBP_T_CELL_PROLIFERATION	187	0.649072	1.84388	0.00209205	0.103142	0.707	3374	tags=55%, list=22%, signal=70%
GOBP_LEUKOCYTE_PROLIFERATION	GOBP_LEUKOCYTE_PROLIFERATION	303	0.622235	1.84348	0	0.101961	0.707	3383	tags=52%, list=22%, signal=66%
GOBP_POSITIVE_REGULATION_OF_CHEMOKINE_PRODUCTION	GOBP_POSITIVE_REGULATION_OF_CHEMOKINE_PRODUCTION	66	0.690515	1.84239	0.0020284	0.101277	0.715	3098	tags=58%, list=20%, signal=72%
GOBP_TOLL_LIKE_RECEPTOR_3_SIGNALING_PATHWAY	GOBP_TOLL_LIKE_RECEPTOR_3_SIGNALING_PATHWAY	19	0.72534	1.84221	0	0.0997693	0.715	1507	tags=42%, list=10%, signal=47%
GOBP_NEGATIVE_REGULATION_OF_EXOCYTOSIS	GOBP_NEGATIVE_REGULATION_OF_EXOCYTOSIS	30	0.694767	1.84081	0	0.0994252	0.72	2885	tags=53%, list=19%, signal=66%
GOBP_NEGATIVE_REGULATION_OF_OXIDOREDUCTASE_ACTIVITY	GOBP_NEGATIVE_REGULATION_OF_OXIDOREDUCTASE_ACTIVITY	22	0.742034	1.83943	0	0.0995451	0.731	1774	tags=41%, list=12%, signal=46%
GOBP_POSITIVE_REGULATION_OF_CYTOKINE_PRODUCTION	GOBP_POSITIVE_REGULATION_OF_CYTOKINE_PRODUCTION	424	0.598268	1.83921	0.00207039	0.0981759	0.732	2978	tags=44%, list=19%, signal=53%
GOBP_RAC_PROTEIN_SIGNAL_TRANSDUCTION	GOBP_RAC_PROTEIN_SIGNAL_TRANSDUCTION	40	0.524464	1.83793	0.00401606	0.0978704	0.735	4157	tags=50%, list=27%, signal=68%
GOBP_CYTOKINE_MEDIATED_SIGNALING_PATHWAY	GOBP_CYTOKINE_MEDIATED_SIGNALING_PATHWAY	418	0.578072	1.83705	0	0.0969422	0.735	3028	tags=41%, list=20%, signal=50%
GOBP_REGULATION_OF_PHOSPHATIDYLINOSITOL_3_KINASE_ACTIVITY	GOBP_REGULATION_OF_PHOSPHATIDYLINOSITOL_3_KINASE_ACTIVITY	51	0.657836	1.83652	0	0.096144	0.736	2925	tags=51%, list=19%, signal=63%
GOBP_MYELOID_LEUKOCYTE_ACTIVATION	GOBP_MYELOID_LEUKOCYTE_ACTIVATION	211	0.649081	1.83494	0.00204499	0.0957051	0.737	3109	tags=57%, list=20%, signal=70%
GOBP_REGULATION_OF_INFLAMMATORY_RESPONSE	GOBP_REGULATION_OF_INFLAMMATORY_RESPONSE	321	0.607119	1.83415	0	0.0953514	0.738	2953	tags=45%, list=19%, signal=55%
GOBP_POSITIVE_REGULATION_OF_RESPONSE_TO_EXTERNAL_STIMULUS	GOBP_POSITIVE_REGULATION_OF_RESPONSE_TO_EXTERNAL_STIMULUS	391	0.596152	1.8334	0	0.0947234	0.74	3409	tags=48%, list=22%, signal=60%
GOBP_POSITIVE_REGULATION_OF_CYSTEINE_TYPE_ENDOPEPTIDASE_ACTIVITY	GOBP_POSITIVE_REGULATION_OF_CYSTEINE_TYPE_ENDOPEPTIDASE_ACTIVITY	130	0.523875	1.83202	0	0.0947672	0.744	2902	tags=35%, list=19%, signal=42%
GOBP_MEMBRANE_INVAGINATION	GOBP_MEMBRANE_INVAGINATION	68	0.577298	1.83184	0.00196464	0.0936189	0.744	2913	tags=44%, list=19%, signal=54%
GOBP_REGULATION_OF_SPROUTING_ANGIOGENESIS	GOBP_REGULATION_OF_SPROUTING_ANGIOGENESIS	36	0.663172	1.83074	0	0.0930941	0.747	2017	tags=36%, list=13%, signal=41%
GOBP_T_CELL_ACTIVATION	GOBP_T_CELL_ACTIVATION	458	0.608613	1.83041	0.00209644	0.0921249	0.747	3374	tags=50%, list=22%, signal=62%
GOBP_NUCLEOTIDE_BINDING_DOMAIN_LEUCINE_RICH_REPEAT_CONTAINING_RECEPTOR_SIGNALING_PATHWAY	GOBP_NUCLEOTIDE_BINDING_DOMAIN_LEUCINE_RICH_REPEAT_CONTAINING_RECEPTOR_SIGNALING_PATHWAY	21	0.690334	1.82949	0.0020202	0.0918073	0.75	2035	tags=43%, list=13%, signal=49%
GOBP_REGULATION_OF_PHOSPHATASE_ACTIVITY	GOBP_REGULATION_OF_PHOSPHATASE_ACTIVITY	74	0.540942	1.8287	0	0.091235	0.751	3538	tags=39%, list=23%, signal=51%
GOBP_CELLULAR_RESPONSE_TO_MOLECULE_OF_BACTERIAL_ORIGIN	GOBP_CELLULAR_RESPONSE_TO_MOLECULE_OF_BACTERIAL_ORIGIN	193	0.628038	1.82867	0.00204082	0.0900346	0.751	2783	tags=45%, list=18%, signal=54%
GOBP_POSITIVE_REGULATION_OF_LEUKOCYTE_MIGRATION	GOBP_POSITIVE_REGULATION_OF_LEUKOCYTE_MIGRATION	130	0.638643	1.82824	0	0.0892177	0.751	2998	tags=52%, list=20%, signal=63%
GOBP_REGULATION_OF_LEUKOCYTE_MIGRATION	GOBP_REGULATION_OF_LEUKOCYTE_MIGRATION	192	0.633849	1.82808	0	0.0882311	0.751	3363	tags=55%, list=22%, signal=70%
GOBP_REGULATION_OF_T_CELL_ACTIVATION	GOBP_REGULATION_OF_T_CELL_ACTIVATION	308	0.623057	1.82695	0	0.0878897	0.756	3187	tags=52%, list=21%, signal=64%
GOBP_T_CELL_RECEPTOR_SIGNALING_PATHWAY	GOBP_T_CELL_RECEPTOR_SIGNALING_PATHWAY	116	0.641298	1.82675	0.00410678	0.0869357	0.758	2605	tags=41%, list=17%, signal=48%
GOBP_INTERLEUKIN_1_PRODUCTION	GOBP_INTERLEUKIN_1_PRODUCTION	97	0.685618	1.82665	0.00202429	0.0859809	0.759	2567	tags=54%, list=17%, signal=64%
GOBP_SELECTIVE_AUTOPHAGY	GOBP_SELECTIVE_AUTOPHAGY	68	0.375199	1.82659	0.0182186	0.084953	0.759	5833	tags=37%, list=38%, signal=59%
GOBP_REGULATION_OF_IMMUNE_EFFECTOR_PROCESS	GOBP_REGULATION_OF_IMMUNE_EFFECTOR_PROCESS	320	0.625744	1.82593	0.00204918	0.0844897	0.762	3119	tags=50%, list=20%, signal=61%
GOBP_CELLULAR_RESPONSE_TO_BIOTIC_STIMULUS	GOBP_CELLULAR_RESPONSE_TO_BIOTIC_STIMULUS	218	0.602227	1.82583	0.00203666	0.083594	0.763	2783	tags=41%, list=18%, signal=50%
GOBP_NEGATIVE_REGULATION_OF_CYTOKINE_PRODUCTION	GOBP_NEGATIVE_REGULATION_OF_CYTOKINE_PRODUCTION	246	0.603389	1.82549	0	0.0828825	0.766	2927	tags=46%, list=19%, signal=56%
GOBP_LEUKOCYTE_MEDIATED_IMMUNITY	GOBP_LEUKOCYTE_MEDIATED_IMMUNITY	347	0.621889	1.82546	0.00205761	0.0819392	0.766	3132	tags=50%, list=20%, signal=61%
GOBP_POSITIVE_REGULATION_OF_BLOOD_VESSEL_ENDOTHELIAL_CELL_MIGRATION	GOBP_POSITIVE_REGULATION_OF_BLOOD_VESSEL_ENDOTHELIAL_CELL_MIGRATION	49	0.584716	1.82511	0.00196078	0.081309	0.768	3288	tags=41%, list=21%, signal=52%
GOBP_NEGATIVE_REGULATION_OF_ENDOTHELIAL_CELL_PROLIFERATION	GOBP_NEGATIVE_REGULATION_OF_ENDOTHELIAL_CELL_PROLIFERATION	36	0.693564	1.82467	0	0.0806007	0.77	3174	tags=56%, list=21%, signal=70%
GOBP_VACUOLE_ORGANIZATION	GOBP_VACUOLE_ORGANIZATION	164	0.334982	1.82398	0.00412371	0.0800764	0.772	5180	tags=33%, list=34%, signal=49%
GOBP_POSITIVE_REGULATION_OF_LEUKOCYTE_CELL_CELL_ADHESION	GOBP_POSITIVE_REGULATION_OF_LEUKOCYTE_CELL_CELL_ADHESION	222	0.662954	1.82362	0	0.0796206	0.772	3172	tags=59%, list=21%, signal=73%
GOBP_CELL_ACTIVATION_INVOLVED_IN_IMMUNE_RESPONSE	GOBP_CELL_ACTIVATION_INVOLVED_IN_IMMUNE_RESPONSE	267	0.60196	1.82333	0.00416667	0.0788858	0.772	3419	tags=50%, list=22%, signal=63%
GOBP_REGULATION_OF_LEUKOCYTE_MEDIATED_IMMUNITY	GOBP_REGULATION_OF_LEUKOCYTE_MEDIATED_IMMUNITY	211	0.654901	1.82192	0.00203666	0.0792255	0.774	3119	tags=54%, list=20%, signal=67%
GOBP_POSITIVE_REGULATION_OF_CELL_CELL_ADHESION	GOBP_POSITIVE_REGULATION_OF_CELL_CELL_ADHESION	262	0.631063	1.82122	0.00203666	0.0791738	0.776	3128	tags=54%, list=20%, signal=66%
GOBP_REGULATION_OF_RAS_PROTEIN_SIGNAL_TRANSDUCTION	GOBP_REGULATION_OF_RAS_PROTEIN_SIGNAL_TRANSDUCTION	178	0.459414	1.82031	0	0.0790373	0.777	4398	tags=47%, list=29%, signal=65%
GOBP_FC_RECEPTOR_MEDIATED_STIMULATORY_SIGNALING_PATHWAY	GOBP_FC_RECEPTOR_MEDIATED_STIMULATORY_SIGNALING_PATHWAY	32	0.624775	1.81996	0.0102669	0.0783708	0.777	3737	tags=56%, list=24%, signal=74%
GOBP_RESPONSE_TO_MURAMYL_DIPEPTIDE	GOBP_RESPONSE_TO_MURAMYL_DIPEPTIDE	18	0.661614	1.81881	0.0121704	0.0784068	0.781	2435	tags=44%, list=16%, signal=53%
GOBP_ANTIGEN_PROCESSING_AND_PRESENTATION_OF_PEPTIDE_ANTIGEN	GOBP_ANTIGEN_PROCESSING_AND_PRESENTATION_OF_PEPTIDE_ANTIGEN	52	0.665902	1.81841	0.00403226	0.0778129	0.784	4349	tags=77%, list=28%, signal=107%
GOBP_REGULATION_OF_ADAPTIVE_IMMUNE_RESPONSE	GOBP_REGULATION_OF_ADAPTIVE_IMMUNE_RESPONSE	170	0.654768	1.81665	0.00208333	0.0782987	0.789	2705	tags=52%, list=18%, signal=62%
GOBP_REGULATION_OF_ERYTHROCYTE_DIFFERENTIATION	GOBP_REGULATION_OF_ERYTHROCYTE_DIFFERENTIATION	42	0.494918	1.81621	0.00406504	0.0778663	0.791	3737	tags=31%, list=24%, signal=41%
GOBP_POSITIVE_REGULATION_OF_MONONUCLEAR_CELL_MIGRATION	GOBP_POSITIVE_REGULATION_OF_MONONUCLEAR_CELL_MIGRATION	60	0.704146	1.81532	0.00207039	0.0777467	0.793	2953	tags=58%, list=19%, signal=72%
GOBP_POSITIVE_REGULATION_OF_CELL_ACTIVATION	GOBP_POSITIVE_REGULATION_OF_CELL_ACTIVATION	318	0.621623	1.81493	0.00412371	0.0771396	0.793	3128	tags=51%, list=20%, signal=63%
GOBP_REGULATION_OF_EPITHELIAL_CELL_MIGRATION	GOBP_REGULATION_OF_EPITHELIAL_CELL_MIGRATION	213	0.521671	1.81396	0	0.0770505	0.795	3409	tags=41%, list=22%, signal=52%
GOBP_REGULATION_OF_CYSTEINE_TYPE_ENDOPEPTIDASE_ACTIVITY	GOBP_REGULATION_OF_CYSTEINE_TYPE_ENDOPEPTIDASE_ACTIVITY	206	0.49071	1.81389	0	0.0763437	0.795	2936	tags=33%, list=19%, signal=41%
GOBP_NEGATIVE_REGULATION_OF_RESPONSE_TO_CYTOKINE_STIMULUS	GOBP_NEGATIVE_REGULATION_OF_RESPONSE_TO_CYTOKINE_STIMULUS	67	0.581822	1.81379	0	0.0757014	0.796	2829	tags=34%, list=18%, signal=42%
GOBP_LEUKOCYTE_MIGRATION	GOBP_LEUKOCYTE_MIGRATION	338	0.619667	1.81374	0	0.075	0.796	3126	tags=51%, list=20%, signal=63%
GOBP_POSITIVE_REGULATION_OF_CHEMOTAXIS	GOBP_POSITIVE_REGULATION_OF_CHEMOTAXIS	130	0.61924	1.81317	0	0.0748087	0.797	3409	tags=55%, list=22%, signal=71%
GOBP_INTERLEUKIN_2_PRODUCTION	GOBP_INTERLEUKIN_2_PRODUCTION	61	0.725064	1.81276	0.00204499	0.0746567	0.797	2646	tags=61%, list=17%, signal=73%
GOBP_RESPONSE_TO_VIRUS	GOBP_RESPONSE_TO_VIRUS	336	0.490681	1.81188	0.0040404	0.0746518	0.8	3105	tags=33%, list=20%, signal=41%
GOBP_POSITIVE_REGULATION_OF_PROTEOLYSIS	GOBP_POSITIVE_REGULATION_OF_PROTEOLYSIS	333	0.417395	1.81125	0	0.0744746	0.801	3002	tags=25%, list=20%, signal=31%
GOBP_REGULATION_OF_CELL_CELL_ADHESION	GOBP_REGULATION_OF_CELL_CELL_ADHESION	404	0.579456	1.80956	0	0.0750219	0.804	3187	tags=46%, list=21%, signal=56%
GOBP_CELLULAR_RESPONSE_TO_AMYLOID_BETA	GOBP_CELLULAR_RESPONSE_TO_AMYLOID_BETA	41	0.667844	1.80813	0	0.0755825	0.81	3087	tags=56%, list=20%, signal=70%
GOBP_REGULATION_OF_PROTEIN_DEPHOSPHORYLATION	GOBP_REGULATION_OF_PROTEIN_DEPHOSPHORYLATION	81	0.470219	1.80671	0	0.0759734	0.814	3538	tags=32%, list=23%, signal=41%
GOBP_MYELOID_CELL_ACTIVATION_INVOLVED_IN_IMMUNE_RESPONSE	GOBP_MYELOID_CELL_ACTIVATION_INVOLVED_IN_IMMUNE_RESPONSE	90	0.651714	1.80583	0.00204918	0.0759617	0.819	3109	tags=58%, list=20%, signal=72%
GOBP_REGULATION_OF_LYMPHOCYTE_MIGRATION	GOBP_REGULATION_OF_LYMPHOCYTE_MIGRATION	51	0.666406	1.80411	0.0040404	0.0765772	0.82	3035	tags=53%, list=20%, signal=66%
GOBP_POSITIVE_REGULATION_OF_NIK_NF_KAPPAB_SIGNALING	GOBP_POSITIVE_REGULATION_OF_NIK_NF_KAPPAB_SIGNALING	63	0.63778	1.80295	0.0020284	0.0767127	0.822	3109	tags=48%, list=20%, signal=59%
GOBP_REGULATION_OF_T_CELL_PROLIFERATION	GOBP_REGULATION_OF_T_CELL_PROLIFERATION	157	0.654765	1.80251	0.00414079	0.0764871	0.825	3187	tags=55%, list=21%, signal=69%
GOBP_VIRAL_LIFE_CYCLE	GOBP_VIRAL_LIFE_CYCLE	282	0.443023	1.80144	0	0.0767773	0.83	3134	tags=28%, list=20%, signal=35%
GOBP_REGULATION_OF_HEMOPOIESIS	GOBP_REGULATION_OF_HEMOPOIESIS	328	0.530497	1.79957	0	0.077306	0.834	3090	tags=39%, list=20%, signal=48%
GOBP_T_CELL_DIFFERENTIATION_IN_THYMUS	GOBP_T_CELL_DIFFERENTIATION_IN_THYMUS	74	0.616323	1.79881	0	0.0770601	0.834	3055	tags=42%, list=20%, signal=52%
GOBP_MONONUCLEAR_CELL_MIGRATION	GOBP_MONONUCLEAR_CELL_MIGRATION	168	0.652088	1.79834	0	0.076857	0.837	3044	tags=57%, list=20%, signal=70%
GOBP_ADAPTIVE_IMMUNE_RESPONSE	GOBP_ADAPTIVE_IMMUNE_RESPONSE	401	0.641721	1.79757	0.00412371	0.076905	0.839	2642	tags=51%, list=17%, signal=60%
GOBP_ADAPTIVE_IMMUNE_RESPONSE_BASED_ON_SOMATIC_RECOMBINATION_OF_IMMUNE_RECEPTORS_BUILT_FROM_IMMUNOGLOBULIN_SUPERFAMILY_DOMAINS	GOBP_ADAPTIVE_IMMUNE_RESPONSE_BASED_ON_SOMATIC_RECOMBINATION_OF_IMMUNE_RECEPTORS_BUILT_FROM_IMMUNOGLOBULIN_SUPERFAMILY_DOMAINS	271	0.631256	1.79743	0.0041841	0.0764492	0.839	3132	tags=53%, list=20%, signal=65%
GOBP_POSITIVE_REGULATION_OF_LEUKOCYTE_PROLIFERATION	GOBP_POSITIVE_REGULATION_OF_LEUKOCYTE_PROLIFERATION	145	0.657815	1.79668	0.00622407	0.0765736	0.842	3172	tags=56%, list=21%, signal=70%
GOBP_POSITIVE_REGULATION_OF_T_CELL_PROLIFERATION	GOBP_POSITIVE_REGULATION_OF_T_CELL_PROLIFERATION	94	0.70869	1.7965	0.00413223	0.0761459	0.842	2207	tags=55%, list=14%, signal=64%
GOBP_CYTOSOLIC_CALCIUM_ION_TRANSPORT	GOBP_CYTOSOLIC_CALCIUM_ION_TRANSPORT	157	0.590046	1.79639	0	0.0756144	0.842	2896	tags=45%, list=19%, signal=54%
GOBP_MACROPHAGE_MIGRATION	GOBP_MACROPHAGE_MIGRATION	47	0.702343	1.7955	0.00200803	0.0755106	0.843	3377	tags=62%, list=22%, signal=79%
GOBP_NEGATIVE_REGULATION_OF_LEUKOCYTE_MEDIATED_IMMUNITY	GOBP_NEGATIVE_REGULATION_OF_LEUKOCYTE_MEDIATED_IMMUNITY	62	0.705222	1.79425	0	0.0759111	0.846	2885	tags=61%, list=19%, signal=75%
GOBP_REGULATION_OF_LYMPHOCYTE_ACTIVATION	GOBP_REGULATION_OF_LYMPHOCYTE_ACTIVATION	410	0.5914	1.79422	0.00412371	0.0753358	0.846	3384	tags=50%, list=22%, signal=63%
GOBP_POSITIVE_REGULATION_OF_MACROAUTOPHAGY	GOBP_POSITIVE_REGULATION_OF_MACROAUTOPHAGY	67	0.416004	1.79294	0.0120482	0.0755727	0.851	2991	tags=22%, list=19%, signal=28%
GOBP_CALCIUM_ION_TRANSPORT_INTO_CYTOSOL	GOBP_CALCIUM_ION_TRANSPORT_INTO_CYTOSOL	145	0.605817	1.79026	0	0.077283	0.863	2896	tags=48%, list=19%, signal=59%
GOBP_REGULATION_OF_PROTEIN_TARGETING	GOBP_REGULATION_OF_PROTEIN_TARGETING	62	0.427584	1.79014	0.00200803	0.0767747	0.863	3024	tags=21%, list=20%, signal=26%
GOBP_NEGATIVE_REGULATION_OF_LOCOMOTION	GOBP_NEGATIVE_REGULATION_OF_LOCOMOTION	283	0.531416	1.78841	0	0.0774897	0.869	3430	tags=41%, list=22%, signal=51%
GOBP_DEFENSE_RESPONSE_TO_SYMBIONT	GOBP_DEFENSE_RESPONSE_TO_SYMBIONT	253	0.491028	1.78808	0.01222	0.0771304	0.871	4188	tags=42%, list=27%, signal=57%
GOBP_REGULATION_OF_PHOSPHOPROTEIN_PHOSPHATASE_ACTIVITY	GOBP_REGULATION_OF_PHOSPHOPROTEIN_PHOSPHATASE_ACTIVITY	52	0.527184	1.786	0.00399202	0.0779075	0.874	3538	tags=35%, list=23%, signal=45%
GOBP_INFLAMMATORY_RESPONSE_TO_ANTIGENIC_STIMULUS	GOBP_INFLAMMATORY_RESPONSE_TO_ANTIGENIC_STIMULUS	64	0.684592	1.78422	0	0.07875	0.877	2860	tags=48%, list=19%, signal=59%
GOBP_POSITIVE_REGULATION_OF_ALPHA_BETA_T_CELL_ACTIVATION	GOBP_POSITIVE_REGULATION_OF_ALPHA_BETA_T_CELL_ACTIVATION	63	0.70671	1.78409	0	0.0783125	0.878	3128	tags=63%, list=20%, signal=79%
GOBP_REGULATION_OF_RESPONSE_TO_BIOTIC_STIMULUS	GOBP_REGULATION_OF_RESPONSE_TO_BIOTIC_STIMULUS	307	0.546142	1.78355	0.00420168	0.0782033	0.88	4140	tags=48%, list=27%, signal=64%
GOBP_MONONUCLEAR_CELL_DIFFERENTIATION	GOBP_MONONUCLEAR_CELL_DIFFERENTIATION	403	0.572059	1.78283	0.00627615	0.078133	0.882	3104	tags=42%, list=20%, signal=51%
GOBP_REGULATION_OF_CHEMOTAXIS	GOBP_REGULATION_OF_CHEMOTAXIS	196	0.579511	1.78255	0	0.0777935	0.882	3442	tags=50%, list=22%, signal=64%
GOBP_REGULATION_OF_LEUKOCYTE_PROLIFERATION	GOBP_REGULATION_OF_LEUKOCYTE_PROLIFERATION	232	0.634566	1.78166	0.00207469	0.0777508	0.882	3383	tags=56%, list=22%, signal=71%
GOBP_NEGATIVE_REGULATION_OF_REGULATED_SECRETORY_PATHWAY	GOBP_NEGATIVE_REGULATION_OF_REGULATED_SECRETORY_PATHWAY	22	0.724095	1.7813	0.00392927	0.0774773	0.882	2885	tags=59%, list=19%, signal=73%
GOBP_NATURAL_KILLER_CELL_DIFFERENTIATION	GOBP_NATURAL_KILLER_CELL_DIFFERENTIATION	24	0.665825	1.78046	0.0020284	0.0774538	0.884	3649	tags=50%, list=24%, signal=65%
GOBP_ENDOTHELIAL_CELL_MIGRATION	GOBP_ENDOTHELIAL_CELL_MIGRATION	201	0.528807	1.78011	0	0.0771314	0.885	3409	tags=41%, list=22%, signal=52%
GOBP_ACTIVATION_OF_CYSTEINE_TYPE_ENDOPEPTIDASE_ACTIVITY_INVOLVED_IN_APOPTOTIC_PROCESS	GOBP_ACTIVATION_OF_CYSTEINE_TYPE_ENDOPEPTIDASE_ACTIVITY_INVOLVED_IN_APOPTOTIC_PROCESS	74	0.555003	1.78006	0.00204082	0.0766449	0.885	2896	tags=38%, list=19%, signal=46%
GOBP_RECEPTOR_MEDIATED_ENDOCYTOSIS	GOBP_RECEPTOR_MEDIATED_ENDOCYTOSIS	234	0.479647	1.77997	0	0.0761626	0.885	3294	tags=31%, list=21%, signal=39%
GOBP_T_CELL_DIFFERENTIATION	GOBP_T_CELL_DIFFERENTIATION	245	0.604379	1.77986	0.00622407	0.0757132	0.885	3090	tags=46%, list=20%, signal=57%
GOBP_MUSCLE_CELL_PROLIFERATION	GOBP_MUSCLE_CELL_PROLIFERATION	179	0.573615	1.77933	0	0.0754943	0.885	3717	tags=47%, list=24%, signal=62%
GOBP_REGULATION_OF_ACTIN_FILAMENT_ORGANIZATION	GOBP_REGULATION_OF_ACTIN_FILAMENT_ORGANIZATION	237	0.477195	1.77909	0.00203252	0.0751085	0.885	3677	tags=37%, list=24%, signal=48%
GOBP_CELLULAR_EXTRAVASATION	GOBP_CELLULAR_EXTRAVASATION	71	0.653898	1.77877	0	0.0749042	0.887	2642	tags=51%, list=17%, signal=61%
GOBP_B_CELL_HOMEOSTASIS	GOBP_B_CELL_HOMEOSTASIS	30	0.630922	1.7785	0.0101215	0.0745409	0.887	1996	tags=33%, list=13%, signal=38%
GOBP_APOPTOTIC_CELL_CLEARANCE	GOBP_APOPTOTIC_CELL_CLEARANCE	46	0.653898	1.77837	0.00208768	0.0741305	0.887	3132	tags=54%, list=20%, signal=68%
GOBP_POSITIVE_REGULATION_OF_LEUKOCYTE_CHEMOTAXIS	GOBP_POSITIVE_REGULATION_OF_LEUKOCYTE_CHEMOTAXIS	85	0.631596	1.77744	0	0.0741256	0.888	2953	tags=51%, list=19%, signal=62%
GOBP_NEGATIVE_REGULATION_OF_NIK_NF_KAPPAB_SIGNALING	GOBP_NEGATIVE_REGULATION_OF_NIK_NF_KAPPAB_SIGNALING	22	0.642792	1.77656	0.00416667	0.07446	0.89	3616	tags=50%, list=24%, signal=65%
GOBP_POSITIVE_REGULATION_OF_DEFENSE_RESPONSE	GOBP_POSITIVE_REGULATION_OF_DEFENSE_RESPONSE	253	0.608927	1.77648	0.00403226	0.0740142	0.89	2953	tags=43%, list=19%, signal=53%
GOBP_T_CELL_MIGRATION	GOBP_T_CELL_MIGRATION	60	0.666282	1.77636	0.00204499	0.0736591	0.89	3035	tags=55%, list=20%, signal=68%
GOBP_LEUKOCYTE_ADHESION_TO_VASCULAR_ENDOTHELIAL_CELL	GOBP_LEUKOCYTE_ADHESION_TO_VASCULAR_ENDOTHELIAL_CELL	46	0.712982	1.77562	0	0.0736143	0.893	2524	tags=57%, list=16%, signal=67%
GOBP_I_KAPPAB_PHOSPHORYLATION	GOBP_I_KAPPAB_PHOSPHORYLATION	20	0.724565	1.77545	0.00604839	0.0732594	0.894	1672	tags=40%, list=11%, signal=45%
GOBP_CELL_CHEMOTAXIS	GOBP_CELL_CHEMOTAXIS	261	0.609385	1.77476	0.00202429	0.0732042	0.895	3374	tags=52%, list=22%, signal=66%
GOBP_REGULATION_OF_PEPTIDYL_TYROSINE_PHOSPHORYLATION	GOBP_REGULATION_OF_PEPTIDYL_TYROSINE_PHOSPHORYLATION	231	0.528178	1.77391	0	0.0734705	0.896	3003	tags=40%, list=20%, signal=49%
GOBP_LYMPHOCYTE_MEDIATED_IMMUNITY	GOBP_LYMPHOCYTE_MEDIATED_IMMUNITY	258	0.626619	1.773	0.00408163	0.073626	0.897	3132	tags=51%, list=20%, signal=63%
GOBP_MACROPHAGE_ACTIVATION	GOBP_MACROPHAGE_ACTIVATION	95	0.654359	1.7728	0.00200401	0.0733618	0.899	3363	tags=65%, list=22%, signal=83%
GOBP_REGULATION_OF_CELL_SHAPE	GOBP_REGULATION_OF_CELL_SHAPE	139	0.479005	1.77268	0.00409836	0.0729884	0.899	3931	tags=42%, list=26%, signal=57%
GOBP_REGULATION_OF_LEUKOCYTE_DEGRANULATION	GOBP_REGULATION_OF_LEUKOCYTE_DEGRANULATION	46	0.639965	1.77253	0.00202429	0.0726191	0.9	3737	tags=54%, list=24%, signal=72%
GOBP_POSITIVE_REGULATION_OF_PEPTIDYL_TYROSINE_PHOSPHORYLATION	GOBP_POSITIVE_REGULATION_OF_PEPTIDYL_TYROSINE_PHOSPHORYLATION	170	0.568249	1.77203	0	0.072549	0.9	3003	tags=45%, list=20%, signal=55%
GOBP_MYELOID_LEUKOCYTE_MEDIATED_IMMUNITY	GOBP_MYELOID_LEUKOCYTE_MEDIATED_IMMUNITY	100	0.615781	1.77178	0.00207469	0.072301	0.9	3104	tags=48%, list=20%, signal=60%
GOBP_REGULATION_OF_MYELOID_LEUKOCYTE_MEDIATED_IMMUNITY	GOBP_REGULATION_OF_MYELOID_LEUKOCYTE_MEDIATED_IMMUNITY	58	0.650015	1.77012	0.00206186	0.0731213	0.907	3104	tags=50%, list=20%, signal=62%
GOBP_MYELOID_CELL_DIFFERENTIATION	GOBP_MYELOID_CELL_DIFFERENTIATION	344	0.452874	1.77004	0	0.0727411	0.907	4207	tags=40%, list=27%, signal=54%
GOBP_NEGATIVE_REGULATION_OF_TUMOR_NECROSIS_FACTOR_SUPERFAMILY_CYTOKINE_PRODUCTION	GOBP_NEGATIVE_REGULATION_OF_TUMOR_NECROSIS_FACTOR_SUPERFAMILY_CYTOKINE_PRODUCTION	55	0.704716	1.76946	0.00204082	0.0727252	0.91	2723	tags=62%, list=18%, signal=75%
GOBP_CELLULAR_RESPONSE_TO_DSRNA	GOBP_CELLULAR_RESPONSE_TO_DSRNA	20	0.626158	1.76932	0.00824742	0.0724191	0.911	2783	tags=35%, list=18%, signal=43%
GOBP_POSITIVE_REGULATION_OF_INFLAMMATORY_RESPONSE	GOBP_POSITIVE_REGULATION_OF_INFLAMMATORY_RESPONSE	128	0.653313	1.76914	0	0.0721734	0.911	3109	tags=53%, list=20%, signal=66%
GOBP_ACTIN_POLYMERIZATION_OR_DEPOLYMERIZATION	GOBP_ACTIN_POLYMERIZATION_OR_DEPOLYMERIZATION	171	0.487481	1.76877	0.00400802	0.0720942	0.913	3454	tags=38%, list=22%, signal=48%
GOBP_MACROPHAGE_CHEMOTAXIS	GOBP_MACROPHAGE_CHEMOTAXIS	32	0.665193	1.76876	0.00199203	0.0716988	0.913	3363	tags=56%, list=22%, signal=72%
GOBP_PEPTIDYL_TYROSINE_MODIFICATION	GOBP_PEPTIDYL_TYROSINE_MODIFICATION	344	0.504506	1.76803	0	0.0718008	0.914	3807	tags=45%, list=25%, signal=59%
GOBP_NEGATIVE_REGULATION_OF_INTERLEUKIN_1_PRODUCTION	GOBP_NEGATIVE_REGULATION_OF_INTERLEUKIN_1_PRODUCTION	33	0.73536	1.76793	0	0.0714978	0.914	2567	tags=58%, list=17%, signal=69%
GOBP_ANTIGEN_PROCESSING_AND_PRESENTATION	GOBP_ANTIGEN_PROCESSING_AND_PRESENTATION	95	0.63814	1.76785	0.00625	0.071148	0.915	3358	tags=58%, list=22%, signal=74%
GOBP_VIRAL_PROCESS	GOBP_VIRAL_PROCESS	376	0.398755	1.76763	0	0.0708969	0.915	5004	tags=38%, list=33%, signal=55%
GOBP_ANTIGEN_PROCESSING_AND_PRESENTATION_OF_PEPTIDE_ANTIGEN_VIA_MHC_CLASS_I	GOBP_ANTIGEN_PROCESSING_AND_PRESENTATION_OF_PEPTIDE_ANTIGEN_VIA_MHC_CLASS_I	27	0.608346	1.76686	0.00998004	0.0709606	0.916	4895	tags=74%, list=32%, signal=109%
GOBP_REGULATION_OF_NITRIC_OXIDE_METABOLIC_PROCESS	GOBP_REGULATION_OF_NITRIC_OXIDE_METABOLIC_PROCESS	54	0.650455	1.76617	0	0.0708994	0.916	3294	tags=56%, list=21%, signal=70%
GOBP_POSITIVE_REGULATION_OF_PEPTIDASE_ACTIVITY	GOBP_POSITIVE_REGULATION_OF_PEPTIDASE_ACTIVITY	173	0.479024	1.76493	0	0.0714802	0.92	3114	tags=32%, list=20%, signal=39%
GOBP_NEGATIVE_REGULATION_OF_RESPONSE_TO_EXTERNAL_STIMULUS	GOBP_NEGATIVE_REGULATION_OF_RESPONSE_TO_EXTERNAL_STIMULUS	347	0.534368	1.76428	0	0.0715906	0.922	3358	tags=42%, list=22%, signal=53%
GOBP_REGULATION_OF_ACTIN_CYTOSKELETON_REORGANIZATION	GOBP_REGULATION_OF_ACTIN_CYTOSKELETON_REORGANIZATION	39	0.588738	1.7639	0.004158	0.0714248	0.924	1845	tags=33%, list=12%, signal=38%
GOBP_PRODUCTION_OF_MOLECULAR_MEDIATOR_OF_IMMUNE_RESPONSE	GOBP_PRODUCTION_OF_MOLECULAR_MEDIATOR_OF_IMMUNE_RESPONSE	197	0.585489	1.76372	0.00207469	0.0711752	0.924	2098	tags=37%, list=14%, signal=42%
GOBP_NEGATIVE_REGULATION_OF_NF_KAPPAB_TRANSCRIPTION_FACTOR_ACTIVITY	GOBP_NEGATIVE_REGULATION_OF_NF_KAPPAB_TRANSCRIPTION_FACTOR_ACTIVITY	76	0.518472	1.76342	0.00205339	0.070997	0.926	4405	tags=46%, list=29%, signal=64%
GOBP_VASCULAR_ENDOTHELIAL_GROWTH_FACTOR_PRODUCTION	GOBP_VASCULAR_ENDOTHELIAL_GROWTH_FACTOR_PRODUCTION	34	0.727159	1.76306	0	0.0707711	0.926	2663	tags=62%, list=17%, signal=75%
GOBP_REGULATION_OF_DEPHOSPHORYLATION	GOBP_REGULATION_OF_DEPHOSPHORYLATION	116	0.441455	1.76264	0	0.0706895	0.926	3538	tags=32%, list=23%, signal=41%
GOBP_STRESS_FIBER_ASSEMBLY	GOBP_STRESS_FIBER_ASSEMBLY	101	0.489434	1.76208	0.00207039	0.0707902	0.93	4437	tags=44%, list=29%, signal=61%
GOBP_REGULATION_OF_AUTOPHAGY	GOBP_REGULATION_OF_AUTOPHAGY	316	0.322924	1.76192	0	0.0705589	0.93	4492	tags=28%, list=29%, signal=39%
GOBP_POSITIVE_REGULATION_OF_INTERLEUKIN_2_PRODUCTION	GOBP_POSITIVE_REGULATION_OF_INTERLEUKIN_2_PRODUCTION	33	0.730213	1.76152	0.00406504	0.0704679	0.93	1628	tags=48%, list=11%, signal=54%
GOBP_ACTIVATED_T_CELL_PROLIFERATION	GOBP_ACTIVATED_T_CELL_PROLIFERATION	44	0.703238	1.7609	0.0020284	0.070498	0.931	3172	tags=64%, list=21%, signal=80%
GOBP_NEGATIVE_REGULATION_OF_ACTIN_FILAMENT_BUNDLE_ASSEMBLY	GOBP_NEGATIVE_REGULATION_OF_ACTIN_FILAMENT_BUNDLE_ASSEMBLY	30	0.627224	1.76073	0.00198807	0.0702342	0.931	2493	tags=43%, list=16%, signal=52%
GOBP_POSITIVE_REGULATION_OF_DEPHOSPHORYLATION	GOBP_POSITIVE_REGULATION_OF_DEPHOSPHORYLATION	56	0.567522	1.76068	0	0.0699113	0.931	3538	tags=50%, list=23%, signal=65%
GOBP_REGULATION_OF_LEUKOCYTE_DIFFERENTIATION	GOBP_REGULATION_OF_LEUKOCYTE_DIFFERENTIATION	263	0.556468	1.76009	0.00609756	0.0699525	0.932	3806	tags=51%, list=25%, signal=66%
GOBP_LEUKOCYTE_CHEMOTAXIS	GOBP_LEUKOCYTE_CHEMOTAXIS	198	0.631224	1.76009	0.00202429	0.069598	0.932	2998	tags=52%, list=20%, signal=64%
GOBP_NEGATIVE_REGULATION_OF_INTERLEUKIN_1_BETA_PRODUCTION	GOBP_NEGATIVE_REGULATION_OF_INTERLEUKIN_1_BETA_PRODUCTION	27	0.741137	1.76005	0.00199601	0.0692937	0.933	2896	tags=63%, list=19%, signal=77%
GOBP_BLOOD_VESSEL_ENDOTHELIAL_CELL_MIGRATION	GOBP_BLOOD_VESSEL_ENDOTHELIAL_CELL_MIGRATION	107	0.550271	1.75956	0.00204499	0.0693397	0.935	3308	tags=41%, list=22%, signal=52%
GOBP_CELLULAR_RESPONSE_TO_ACID_CHEMICAL	GOBP_CELLULAR_RESPONSE_TO_ACID_CHEMICAL	72	0.500467	1.75879	0	0.0696757	0.936	4777	tags=47%, list=31%, signal=68%
GOBP_NEGATIVE_REGULATION_OF_EPITHELIAL_CELL_PROLIFERATION	GOBP_NEGATIVE_REGULATION_OF_EPITHELIAL_CELL_PROLIFERATION	118	0.550224	1.75795	0	0.0699358	0.936	3174	tags=40%, list=21%, signal=50%
GOBP_NEGATIVE_REGULATION_OF_CALCIUM_MEDIATED_SIGNALING	GOBP_NEGATIVE_REGULATION_OF_CALCIUM_MEDIATED_SIGNALING	19	0.732418	1.75778	0	0.0696708	0.936	3020	tags=58%, list=20%, signal=72%
GOBP_T_CELL_MEDIATED_IMMUNITY	GOBP_T_CELL_MEDIATED_IMMUNITY	103	0.658865	1.75681	0.00211416	0.0700264	0.936	2849	tags=53%, list=19%, signal=65%
GOBP_SYNCYTIUM_FORMATION	GOBP_SYNCYTIUM_FORMATION	54	0.557719	1.75675	0	0.069707	0.936	3195	tags=41%, list=21%, signal=51%
GOBP_POSITIVE_REGULATION_OF_ALPHA_BETA_T_CELL_DIFFERENTIATION	GOBP_POSITIVE_REGULATION_OF_ALPHA_BETA_T_CELL_DIFFERENTIATION	46	0.6752	1.75609	0.00412371	0.0698077	0.936	3796	tags=65%, list=25%, signal=86%
GOBP_LEUKOCYTE_DEGRANULATION	GOBP_LEUKOCYTE_DEGRANULATION	72	0.624413	1.75584	0.00207039	0.0695716	0.937	1738	tags=39%, list=11%, signal=44%
GOBP_NATURAL_KILLER_CELL_ACTIVATION	GOBP_NATURAL_KILLER_CELL_ACTIVATION	83	0.599259	1.75573	0.00609756	0.0692854	0.937	3758	tags=46%, list=24%, signal=60%
GOBP_CYTOKINE_PRODUCTION_INVOLVED_IN_IMMUNE_RESPONSE	GOBP_CYTOKINE_PRODUCTION_INVOLVED_IN_IMMUNE_RESPONSE	95	0.632649	1.75474	0.00211416	0.0695865	0.938	2953	tags=51%, list=19%, signal=62%
GOBP_REGULATION_OF_T_CELL_MIGRATION	GOBP_REGULATION_OF_T_CELL_MIGRATION	40	0.676237	1.75473	0.00817996	0.0692618	0.938	3035	tags=52%, list=20%, signal=65%
GOBP_LIPOPOLYSACCHARIDE_MEDIATED_SIGNALING_PATHWAY	GOBP_LIPOPOLYSACCHARIDE_MEDIATED_SIGNALING_PATHWAY	57	0.64	1.75445	0.00412371	0.0691212	0.939	2717	tags=46%, list=18%, signal=55%
GOBP_REGULATION_OF_ALPHA_BETA_T_CELL_ACTIVATION	GOBP_REGULATION_OF_ALPHA_BETA_T_CELL_ACTIVATION	93	0.678429	1.75426	0.00831601	0.0689333	0.94	3306	tags=60%, list=22%, signal=76%
GOBP_POSITIVE_REGULATION_OF_PHAGOCYTOSIS	GOBP_POSITIVE_REGULATION_OF_PHAGOCYTOSIS	65	0.679091	1.7539	0.00409836	0.068839	0.94	3845	tags=72%, list=25%, signal=96%
GOBP_POSITIVE_REGULATION_OF_AUTOPHAGY	GOBP_POSITIVE_REGULATION_OF_AUTOPHAGY	127	0.374644	1.75345	0	0.0688052	0.94	4400	tags=30%, list=29%, signal=42%
GOBP_RESPONSE_TO_MOLECULE_OF_BACTERIAL_ORIGIN	GOBP_RESPONSE_TO_MOLECULE_OF_BACTERIAL_ORIGIN	310	0.583146	1.75134	0.00204082	0.0699912	0.941	3132	tags=46%, list=20%, signal=56%
GOBP_REGULATION_OF_PRODUCTION_OF_MOLECULAR_MEDIATOR_OF_IMMUNE_RESPONSE	GOBP_REGULATION_OF_PRODUCTION_OF_MOLECULAR_MEDIATOR_OF_IMMUNE_RESPONSE	154	0.601201	1.75083	0	0.0700011	0.941	2849	tags=44%, list=19%, signal=53%
GOBP_REGULATION_OF_LEUKOCYTE_CHEMOTAXIS	GOBP_REGULATION_OF_LEUKOCYTE_CHEMOTAXIS	105	0.622569	1.7507	0.00404858	0.0697979	0.941	2953	tags=50%, list=19%, signal=62%
GOBP_POSITIVE_REGULATION_OF_INTERLEUKIN_1_PRODUCTION	GOBP_POSITIVE_REGULATION_OF_INTERLEUKIN_1_PRODUCTION	61	0.686578	1.7506	0.00628931	0.0695369	0.941	2517	tags=56%, list=16%, signal=66%
GOBP_NEGATIVE_REGULATION_OF_PHOSPHORUS_METABOLIC_PROCESS	GOBP_NEGATIVE_REGULATION_OF_PHOSPHORUS_METABOLIC_PROCESS	379	0.430008	1.75056	0	0.0692492	0.941	4682	tags=44%, list=30%, signal=61%
GOBP_MYELOID_LEUKOCYTE_DIFFERENTIATION	GOBP_MYELOID_LEUKOCYTE_DIFFERENTIATION	192	0.526011	1.75026	0	0.0690961	0.941	3806	tags=47%, list=25%, signal=62%
GOBP_POSITIVE_REGULATION_OF_ENDOCYTOSIS	GOBP_POSITIVE_REGULATION_OF_ENDOCYTOSIS	95	0.532705	1.74873	0.0021097	0.069704	0.945	4396	tags=51%, list=29%, signal=70%
GOBP_LEUKOCYTE_HOMEOSTASIS	GOBP_LEUKOCYTE_HOMEOSTASIS	86	0.585879	1.74867	0.00801603	0.0694408	0.945	2373	tags=40%, list=15%, signal=46%
GOBP_ACTIN_FILAMENT_ORGANIZATION	GOBP_ACTIN_FILAMENT_ORGANIZATION	401	0.45782	1.74826	0	0.0693263	0.945	3677	tags=35%, list=24%, signal=45%
GOBP_PLATELET_MORPHOGENESIS	GOBP_PLATELET_MORPHOGENESIS	21	0.550825	1.74708	0.0167015	0.0697708	0.948	2508	tags=29%, list=16%, signal=34%
GOBP_SECOND_MESSENGER_MEDIATED_SIGNALING	GOBP_SECOND_MESSENGER_MEDIATED_SIGNALING	273	0.569873	1.74705	0	0.0694717	0.948	3057	tags=41%, list=20%, signal=50%
GOBP_POSITIVE_REGULATION_OF_LIPASE_ACTIVITY	GOBP_POSITIVE_REGULATION_OF_LIPASE_ACTIVITY	65	0.609678	1.74595	0	0.069979	0.948	2675	tags=43%, list=17%, signal=52%
GOBP_VASCULOGENESIS	GOBP_VASCULOGENESIS	77	0.584802	1.74568	0.00403226	0.0698617	0.949	3844	tags=52%, list=25%, signal=69%
GOBP_POSITIVE_REGULATION_OF_ADAPTIVE_IMMUNE_RESPONSE	GOBP_POSITIVE_REGULATION_OF_ADAPTIVE_IMMUNE_RESPONSE	98	0.650626	1.74515	0.00619835	0.0698858	0.949	2642	tags=52%, list=17%, signal=62%
GOBP_REGULATION_OF_MACROPHAGE_MIGRATION	GOBP_REGULATION_OF_MACROPHAGE_MIGRATION	35	0.701635	1.74441	0.00814664	0.0699762	0.95	2927	tags=54%, list=19%, signal=67%
GOBP_ENDOTHELIAL_CELL_PROLIFERATION	GOBP_ENDOTHELIAL_CELL_PROLIFERATION	140	0.591146	1.74404	0	0.069886	0.951	3409	tags=46%, list=22%, signal=58%
GOBP_LYMPHOCYTE_HOMEOSTASIS	GOBP_LYMPHOCYTE_HOMEOSTASIS	63	0.607568	1.74397	0.0160321	0.069613	0.951	2171	tags=37%, list=14%, signal=42%
GOBP_POSITIVE_REGULATION_OF_SYNCYTIUM_FORMATION_BY_PLASMA_MEMBRANE_FUSION	GOBP_POSITIVE_REGULATION_OF_SYNCYTIUM_FORMATION_BY_PLASMA_MEMBRANE_FUSION	20	0.698261	1.74343	0.00197239	0.0696114	0.952	3195	tags=65%, list=21%, signal=82%
GOBP_MICROGLIAL_CELL_ACTIVATION	GOBP_MICROGLIAL_CELL_ACTIVATION	41	0.732623	1.74335	0.00204918	0.0693384	0.952	2846	tags=73%, list=19%, signal=90%
GOBP_REGULATION_OF_T_CELL_DIFFERENTIATION	GOBP_REGULATION_OF_T_CELL_DIFFERENTIATION	140	0.602085	1.74324	0.00411523	0.069107	0.953	3090	tags=47%, list=20%, signal=58%
GOBP_LYMPHOCYTE_ACTIVATION_INVOLVED_IN_IMMUNE_RESPONSE	GOBP_LYMPHOCYTE_ACTIVATION_INVOLVED_IN_IMMUNE_RESPONSE	183	0.571986	1.74255	0.00828157	0.0692647	0.953	3314	tags=44%, list=22%, signal=56%
GOBP_RESPONSE_TO_DSRNA	GOBP_RESPONSE_TO_DSRNA	49	0.494128	1.74213	0.010142	0.0692818	0.953	4120	tags=35%, list=27%, signal=47%
GOBP_NEGATIVE_REGULATION_OF_INNATE_IMMUNE_RESPONSE	GOBP_NEGATIVE_REGULATION_OF_INNATE_IMMUNE_RESPONSE	63	0.579911	1.74198	0.0104167	0.0690702	0.953	4586	tags=54%, list=30%, signal=77%
GOBP_COLLAGEN_ACTIVATED_SIGNALING_PATHWAY	GOBP_COLLAGEN_ACTIVATED_SIGNALING_PATHWAY	16	0.784865	1.74159	0	0.0690386	0.954	2018	tags=56%, list=13%, signal=65%
GOBP_VACUOLAR_LOCALIZATION	GOBP_VACUOLAR_LOCALIZATION	74	0.525152	1.74138	0.00623701	0.068884	0.954	4380	tags=47%, list=29%, signal=66%
GOBP_RHO_PROTEIN_SIGNAL_TRANSDUCTION	GOBP_RHO_PROTEIN_SIGNAL_TRANSDUCTION	128	0.49654	1.74121	0.00201613	0.0686713	0.954	4398	tags=48%, list=29%, signal=67%
GOBP_MODULATION_BY_HOST_OF_SYMBIONT_PROCESS	GOBP_MODULATION_BY_HOST_OF_SYMBIONT_PROCESS	59	0.485328	1.74089	0.00199203	0.0686564	0.955	3171	tags=25%, list=21%, signal=32%
GOBP_POSITIVE_REGULATION_OF_RESPONSE_TO_CYTOKINE_STIMULUS	GOBP_POSITIVE_REGULATION_OF_RESPONSE_TO_CYTOKINE_STIMULUS	55	0.547166	1.74059	0.0167015	0.0685439	0.955	2642	tags=33%, list=17%, signal=39%
GOBP_REGULATION_OF_T_CELL_MEDIATED_IMMUNITY	GOBP_REGULATION_OF_T_CELL_MEDIATED_IMMUNITY	80	0.680688	1.74028	0.00209644	0.0684384	0.956	2098	tags=49%, list=14%, signal=56%
GOBP_POSITIVE_REGULATION_OF_INTERLEUKIN_1_BETA_PRODUCTION	GOBP_POSITIVE_REGULATION_OF_INTERLEUKIN_1_BETA_PRODUCTION	52	0.714627	1.7402	0.00626305	0.0681957	0.956	2517	tags=62%, list=16%, signal=73%
GOBP_REGULATION_OF_LIPID_KINASE_ACTIVITY	GOBP_REGULATION_OF_LIPID_KINASE_ACTIVITY	62	0.571335	1.73974	0.00411523	0.0681566	0.957	2925	tags=44%, list=19%, signal=54%
GOBP_CELL_SUBSTRATE_ADHESION	GOBP_CELL_SUBSTRATE_ADHESION	340	0.508282	1.73968	0.00614754	0.0679167	0.957	3844	tags=44%, list=25%, signal=58%
GOBP_REGULATION_OF_PHAGOCYTOSIS	GOBP_REGULATION_OF_PHAGOCYTOSIS	91	0.625887	1.73957	0.00607287	0.0677215	0.957	3320	tags=57%, list=22%, signal=72%
GOBP_POSITIVE_REGULATION_OF_LYMPHOCYTE_DIFFERENTIATION	GOBP_POSITIVE_REGULATION_OF_LYMPHOCYTE_DIFFERENTIATION	99	0.615757	1.73954	0.004	0.0674783	0.957	3090	tags=51%, list=20%, signal=63%
GOBP_POSITIVE_REGULATION_OF_CYTOKINE_PRODUCTION_INVOLVED_IN_INFLAMMATORY_RESPONSE	GOBP_POSITIVE_REGULATION_OF_CYTOKINE_PRODUCTION_INVOLVED_IN_INFLAMMATORY_RESPONSE	22	0.690312	1.7376	0.00571429	0.0684946	0.962	3098	tags=59%, list=20%, signal=74%
GOBP_POSITIVE_REGULATION_OF_MAP_KINASE_ACTIVITY	GOBP_POSITIVE_REGULATION_OF_MAP_KINASE_ACTIVITY	112	0.555624	1.73727	0	0.0685104	0.962	3377	tags=46%, list=22%, signal=58%
GOBP_NEGATIVE_REGULATION_OF_KINASE_ACTIVITY	GOBP_NEGATIVE_REGULATION_OF_KINASE_ACTIVITY	203	0.437974	1.73717	0	0.068265	0.962	4669	tags=46%, list=30%, signal=65%
GOBP_POSITIVE_REGULATION_OF_INTERLEUKIN_6_PRODUCTION	GOBP_POSITIVE_REGULATION_OF_INTERLEUKIN_6_PRODUCTION	88	0.604239	1.73647	0.00404858	0.068499	0.962	3098	tags=50%, list=20%, signal=62%
GOBP_JNK_CASCADE	GOBP_JNK_CASCADE	168	0.489046	1.73644	0	0.0682373	0.962	3430	tags=36%, list=22%, signal=46%
GOBP_REGULATION_OF_LYMPHOCYTE_MEDIATED_IMMUNITY	GOBP_REGULATION_OF_LYMPHOCYTE_MEDIATED_IMMUNITY	151	0.658917	1.73592	0.00413223	0.0683908	0.962	2849	tags=53%, list=19%, signal=64%
GOBP_B_CELL_MEDIATED_IMMUNITY	GOBP_B_CELL_MEDIATED_IMMUNITY	128	0.610709	1.73524	0.00806452	0.0686455	0.962	3132	tags=52%, list=20%, signal=64%
GOBP_POSITIVE_REGULATION_OF_PHOSPHOLIPASE_ACTIVITY	GOBP_POSITIVE_REGULATION_OF_PHOSPHOLIPASE_ACTIVITY	54	0.63396	1.73444	0	0.0688342	0.964	2901	tags=50%, list=19%, signal=61%
GOBP_CLATHRIN_DEPENDENT_ENDOCYTOSIS	GOBP_CLATHRIN_DEPENDENT_ENDOCYTOSIS	46	0.482656	1.73421	0.00395257	0.0687377	0.964	5864	tags=54%, list=38%, signal=88%
GOBP_NEGATIVE_REGULATION_OF_PHOSPHORYLATION	GOBP_NEGATIVE_REGULATION_OF_PHOSPHORYLATION	328	0.431631	1.73364	0.00201207	0.068786	0.964	4678	tags=45%, list=30%, signal=64%
GOBP_NEGATIVE_REGULATION_OF_TYPE_I_INTERFERON_PRODUCTION	GOBP_NEGATIVE_REGULATION_OF_TYPE_I_INTERFERON_PRODUCTION	25	0.644872	1.73342	0.00203666	0.068658	0.964	2263	tags=44%, list=15%, signal=52%
GOBP_REGULATION_OF_SYNCYTIUM_FORMATION_BY_PLASMA_MEMBRANE_FUSION	GOBP_REGULATION_OF_SYNCYTIUM_FORMATION_BY_PLASMA_MEMBRANE_FUSION	25	0.649783	1.73237	0.00198807	0.0690812	0.966	3195	tags=64%, list=21%, signal=81%
GOBP_REGULATION_OF_CELL_MIGRATION_INVOLVED_IN_SPROUTING_ANGIOGENESIS	GOBP_REGULATION_OF_CELL_MIGRATION_INVOLVED_IN_SPROUTING_ANGIOGENESIS	37	0.613532	1.73208	0.00587084	0.0689754	0.966	3288	tags=46%, list=21%, signal=58%
GOBP_POSITIVE_REGULATION_OF_HEMOPOIESIS	GOBP_POSITIVE_REGULATION_OF_HEMOPOIESIS	148	0.565685	1.73089	0.00994036	0.0694649	0.967	3806	tags=55%, list=25%, signal=72%
GOBP_ACTIVATION_OF_INNATE_IMMUNE_RESPONSE	GOBP_ACTIVATION_OF_INNATE_IMMUNE_RESPONSE	50	0.607546	1.73083	0.01222	0.0692798	0.967	2787	tags=36%, list=18%, signal=44%
GOBP_REGULATION_OF_TOLL_LIKE_RECEPTOR_SIGNALING_PATHWAY	GOBP_REGULATION_OF_TOLL_LIKE_RECEPTOR_SIGNALING_PATHWAY	65	0.589771	1.73039	0.0020202	0.069276	0.967	3109	tags=43%, list=20%, signal=54%
GOBP_HOMEOSTASIS_OF_NUMBER_OF_CELLS	GOBP_HOMEOSTASIS_OF_NUMBER_OF_CELLS	263	0.450967	1.73031	0	0.0690981	0.967	3091	tags=29%, list=20%, signal=36%
GOBP_REGULATION_OF_MAST_CELL_ACTIVATION	GOBP_REGULATION_OF_MAST_CELL_ACTIVATION	41	0.644158	1.7303	0.0020284	0.0688333	0.967	3393	tags=56%, list=22%, signal=72%
GOBP_INTERLEUKIN_10_PRODUCTION	GOBP_INTERLEUKIN_10_PRODUCTION	54	0.70065	1.7298	0	0.0689287	0.967	2098	tags=52%, list=14%, signal=60%
GOBP_RESPONSE_TO_AMYLOID_BETA	GOBP_RESPONSE_TO_AMYLOID_BETA	49	0.654644	1.72967	0.00203252	0.0687538	0.967	3087	tags=55%, list=20%, signal=69%
GOBP_REGULATION_OF_ACTIN_FILAMENT_BUNDLE_ASSEMBLY	GOBP_REGULATION_OF_ACTIN_FILAMENT_BUNDLE_ASSEMBLY	96	0.491292	1.72951	0.00608519	0.0686352	0.967	2593	tags=29%, list=17%, signal=35%
GOBP_LYMPHOCYTE_MIGRATION	GOBP_LYMPHOCYTE_MIGRATION	94	0.668614	1.72901	0.00207039	0.0686987	0.968	3035	tags=56%, list=20%, signal=70%
GOBP_POSITIVE_REGULATION_OF_PHOSPHATASE_ACTIVITY	GOBP_POSITIVE_REGULATION_OF_PHOSPHATASE_ACTIVITY	34	0.646247	1.72889	0	0.068532	0.968	3757	tags=62%, list=24%, signal=82%
GOBP_REGULATION_OF_CALCIUM_ION_TRANSPORT_INTO_CYTOSOL	GOBP_REGULATION_OF_CALCIUM_ION_TRANSPORT_INTO_CYTOSOL	90	0.59969	1.72873	0	0.06838	0.968	2995	tags=49%, list=20%, signal=60%
GOBP_REGULATION_OF_ALPHA_BETA_T_CELL_DIFFERENTIATION	GOBP_REGULATION_OF_ALPHA_BETA_T_CELL_DIFFERENTIATION	63	0.659806	1.7277	0.00622407	0.0686832	0.968	3796	tags=62%, list=25%, signal=82%
GOBP_POSITIVE_REGULATION_OF_IMMUNE_EFFECTOR_PROCESS	GOBP_POSITIVE_REGULATION_OF_IMMUNE_EFFECTOR_PROCESS	220	0.605125	1.72652	0.00408998	0.0692232	0.968	3104	tags=48%, list=20%, signal=59%
GOBP_PROCESS_UTILIZING_AUTOPHAGIC_MECHANISM	GOBP_PROCESS_UTILIZING_AUTOPHAGIC_MECHANISM	492	0.289636	1.72627	0.00204918	0.0691473	0.968	5065	tags=30%, list=33%, signal=43%
GOBP_POSITIVE_REGULATION_OF_PATTERN_RECOGNITION_RECEPTOR_SIGNALING_PATHWAY	GOBP_POSITIVE_REGULATION_OF_PATTERN_RECOGNITION_RECEPTOR_SIGNALING_PATHWAY	40	0.603103	1.72621	0.00402414	0.0689082	0.968	1512	tags=33%, list=10%, signal=36%
GOBP_REGULATION_OF_PHOSPHATIDYLINOSITOL_3_KINASE_SIGNALING	GOBP_REGULATION_OF_PHOSPHATIDYLINOSITOL_3_KINASE_SIGNALING	100	0.588659	1.72579	0	0.0689	0.969	3807	tags=53%, list=25%, signal=70%
GOBP_ACTIN_CYTOSKELETON_REORGANIZATION	GOBP_ACTIN_CYTOSKELETON_REORGANIZATION	105	0.492255	1.72546	0.00641026	0.0688316	0.969	3419	tags=36%, list=22%, signal=46%
GOBP_SMOOTH_MUSCLE_CELL_PROLIFERATION	GOBP_SMOOTH_MUSCLE_CELL_PROLIFERATION	133	0.581936	1.72487	0.0020284	0.068942	0.969	3430	tags=48%, list=22%, signal=61%
GOBP_REGULATION_OF_LYMPHOCYTE_DIFFERENTIATION	GOBP_REGULATION_OF_LYMPHOCYTE_DIFFERENTIATION	169	0.580974	1.72479	0.00819672	0.0687328	0.969	3090	tags=47%, list=20%, signal=58%
GOBP_REGULATION_OF_DNA_BINDING_TRANSCRIPTION_FACTOR_ACTIVITY	GOBP_REGULATION_OF_DNA_BINDING_TRANSCRIPTION_FACTOR_ACTIVITY	395	0.445934	1.72443	0	0.0688006	0.969	3569	tags=35%, list=23%, signal=44%
GOBP_POSITIVE_REGULATION_OF_CATABOLIC_PROCESS	GOBP_POSITIVE_REGULATION_OF_CATABOLIC_PROCESS	469	0.335921	1.72441	0	0.0685563	0.969	4649	tags=31%, list=30%, signal=43%
GOBP_REGULATION_OF_CYTOSOLIC_CALCIUM_ION_CONCENTRATION	GOBP_REGULATION_OF_CYTOSOLIC_CALCIUM_ION_CONCENTRATION	317	0.567414	1.72365	0	0.0686954	0.97	3111	tags=44%, list=20%, signal=55%
GOBP_NEGATIVE_REGULATION_OF_INTRACELLULAR_SIGNAL_TRANSDUCTION	GOBP_NEGATIVE_REGULATION_OF_INTRACELLULAR_SIGNAL_TRANSDUCTION	449	0.404801	1.72356	0.00197628	0.0684872	0.97	4006	tags=35%, list=26%, signal=46%
GOBP_ALPHA_BETA_T_CELL_ACTIVATION	GOBP_ALPHA_BETA_T_CELL_ACTIVATION	143	0.648484	1.72328	0.0124224	0.0684297	0.97	3306	tags=57%, list=22%, signal=72%
GOBP_AMYLOID_BETA_CLEARANCE	GOBP_AMYLOID_BETA_CLEARANCE	36	0.652222	1.72285	0.00622407	0.0684985	0.97	2986	tags=50%, list=19%, signal=62%
GOBP_POSITIVE_REGULATION_OF_PROTEIN_EXPORT_FROM_NUCLEUS	GOBP_POSITIVE_REGULATION_OF_PROTEIN_EXPORT_FROM_NUCLEUS	17	0.571123	1.72249	0.0124224	0.0685385	0.971	3556	tags=29%, list=23%, signal=38%
GOBP_POSITIVE_REGULATION_OF_PROTEIN_CATABOLIC_PROCESS	GOBP_POSITIVE_REGULATION_OF_PROTEIN_CATABOLIC_PROCESS	215	0.375446	1.72171	0	0.0687406	0.971	5057	tags=40%, list=33%, signal=58%
GOBP_CELL_KILLING	GOBP_CELL_KILLING	157	0.623463	1.72141	0.00202429	0.0686983	0.971	3119	tags=49%, list=20%, signal=61%
GOBP_REGULATION_OF_P38MAPK_CASCADE	GOBP_REGULATION_OF_P38MAPK_CASCADE	41	0.607852	1.721	0.00808081	0.0686908	0.972	3385	tags=51%, list=22%, signal=66%
GOBP_ENTRY_INTO_HOST	GOBP_ENTRY_INTO_HOST	139	0.494283	1.72094	0	0.0684762	0.972	2730	tags=32%, list=18%, signal=38%
GOBP_CELL_MATRIX_ADHESION	GOBP_CELL_MATRIX_ADHESION	219	0.511429	1.72079	0	0.068329	0.973	3741	tags=42%, list=24%, signal=55%
GOBP_TOLL_LIKE_RECEPTOR_9_SIGNALING_PATHWAY	GOBP_TOLL_LIKE_RECEPTOR_9_SIGNALING_PATHWAY	18	0.728159	1.72041	0.00811359	0.0683672	0.973	1477	tags=33%, list=10%, signal=37%
GOBP_P38MAPK_CASCADE	GOBP_P38MAPK_CASCADE	50	0.564119	1.71994	0.00598802	0.0683882	0.973	3999	tags=52%, list=26%, signal=70%
GOBP_REGULATION_OF_PHOSPHOLIPASE_ACTIVITY	GOBP_REGULATION_OF_PHOSPHOLIPASE_ACTIVITY	64	0.616519	1.71949	0	0.0684315	0.974	3093	tags=50%, list=20%, signal=62%
GOBP_POSITIVE_REGULATION_OF_JNK_CASCADE	GOBP_POSITIVE_REGULATION_OF_JNK_CASCADE	92	0.545369	1.71947	0.00196464	0.0682287	0.974	3278	tags=42%, list=21%, signal=54%
GOBP_PHOSPHATIDYLINOSITOL_3_KINASE_SIGNALING	GOBP_PHOSPHATIDYLINOSITOL_3_KINASE_SIGNALING	129	0.568436	1.71896	0	0.0683562	0.974	3807	tags=50%, list=25%, signal=66%
GOBP_NEGATIVE_REGULATION_OF_ADAPTIVE_IMMUNE_RESPONSE	GOBP_NEGATIVE_REGULATION_OF_ADAPTIVE_IMMUNE_RESPONSE	58	0.667651	1.71868	0.00410678	0.0684009	0.974	2705	tags=53%, list=18%, signal=65%
GOBP_INOSITOL_LIPID_MEDIATED_SIGNALING	GOBP_INOSITOL_LIPID_MEDIATED_SIGNALING	164	0.549406	1.71856	0	0.0682018	0.974	3685	tags=48%, list=24%, signal=62%
GOBP_POSITIVE_REGULATION_OF_PROTEIN_TARGETING_TO_MEMBRANE	GOBP_POSITIVE_REGULATION_OF_PROTEIN_TARGETING_TO_MEMBRANE	18	0.591053	1.71847	0.0140845	0.0680175	0.974	3024	tags=39%, list=20%, signal=48%
GOBP_NEGATIVE_REGULATION_OF_PRODUCTION_OF_MOLECULAR_MEDIATOR_OF_IMMUNE_RESPONSE	GOBP_NEGATIVE_REGULATION_OF_PRODUCTION_OF_MOLECULAR_MEDIATOR_OF_IMMUNE_RESPONSE	38	0.733561	1.71799	0.00201613	0.0681239	0.974	2795	tags=66%, list=18%, signal=80%
GOBP_REGULATION_OF_VIRAL_PROCESS	GOBP_REGULATION_OF_VIRAL_PROCESS	141	0.451868	1.71797	0.0101215	0.0678996	0.974	2795	tags=27%, list=18%, signal=33%
GOBP_RESPONSE_TO_FLUID_SHEAR_STRESS	GOBP_RESPONSE_TO_FLUID_SHEAR_STRESS	32	0.619644	1.71787	0	0.0677391	0.974	4534	tags=66%, list=30%, signal=93%
GOBP_POSITIVE_REGULATION_OF_SMOOTH_MUSCLE_CELL_PROLIFERATION	GOBP_POSITIVE_REGULATION_OF_SMOOTH_MUSCLE_CELL_PROLIFERATION	78	0.601996	1.71738	0	0.0678175	0.974	3297	tags=53%, list=21%, signal=67%
GOBP_CALCIUM_ION_TRANSPORT	GOBP_CALCIUM_ION_TRANSPORT	365	0.51324	1.71729	0	0.0676229	0.974	2998	tags=36%, list=20%, signal=44%
GOBP_BIOLOGICAL_PROCESS_INVOLVED_IN_INTERACTION_WITH_HOST	GOBP_BIOLOGICAL_PROCESS_INVOLVED_IN_INTERACTION_WITH_HOST	173	0.452348	1.71711	0	0.067509	0.974	2730	tags=27%, list=18%, signal=32%
GOBP_PROTEIN_KINASE_B_SIGNALING	GOBP_PROTEIN_KINASE_B_SIGNALING	174	0.520296	1.71704	0	0.0673042	0.974	2761	tags=33%, list=18%, signal=39%
GOBP_NEGATIVE_REGULATION_OF_VASCULATURE_DEVELOPMENT	GOBP_NEGATIVE_REGULATION_OF_VASCULATURE_DEVELOPMENT	89	0.561624	1.71677	0	0.0672565	0.975	2217	tags=36%, list=14%, signal=42%
GOBP_POSITIVE_REGULATION_OF_PROTEIN_CONTAINING_COMPLEX_ASSEMBLY	GOBP_POSITIVE_REGULATION_OF_PROTEIN_CONTAINING_COMPLEX_ASSEMBLY	175	0.461287	1.71639	0.00207039	0.0673004	0.975	3583	tags=34%, list=23%, signal=44%
GOBP_T_CELL_CYTOKINE_PRODUCTION	GOBP_T_CELL_CYTOKINE_PRODUCTION	37	0.695187	1.71597	0.00213675	0.0673361	0.975	2705	tags=54%, list=18%, signal=65%
GOBP_POSITIVE_REGULATION_OF_INTERLEUKIN_10_PRODUCTION	GOBP_POSITIVE_REGULATION_OF_INTERLEUKIN_10_PRODUCTION	38	0.71682	1.71596	0	0.0671246	0.975	2098	tags=53%, list=14%, signal=61%
GOBP_RESPONSE_TO_TUMOR_NECROSIS_FACTOR	GOBP_RESPONSE_TO_TUMOR_NECROSIS_FACTOR	198	0.510264	1.71548	0	0.067143	0.976	2822	tags=35%, list=18%, signal=42%
GOBP_TYPE_I_INTERFERON_PRODUCTION	GOBP_TYPE_I_INTERFERON_PRODUCTION	88	0.519317	1.7154	0.0224033	0.0669587	0.976	2766	tags=32%, list=18%, signal=39%
GOBP_T_CELL_ACTIVATION_INVOLVED_IN_IMMUNE_RESPONSE	GOBP_T_CELL_ACTIVATION_INVOLVED_IN_IMMUNE_RESPONSE	107	0.59824	1.71531	0.0104384	0.066789	0.976	3795	tags=52%, list=25%, signal=69%
GOBP_REGULATION_OF_INNATE_IMMUNE_RESPONSE	GOBP_REGULATION_OF_INNATE_IMMUNE_RESPONSE	202	0.557287	1.71392	0.0145833	0.067516	0.977	3474	tags=42%, list=23%, signal=54%
GOBP_ANTIGEN_PROCESSING_AND_PRESENTATION_OF_EXOGENOUS_PEPTIDE_ANTIGEN	GOBP_ANTIGEN_PROCESSING_AND_PRESENTATION_OF_EXOGENOUS_PEPTIDE_ANTIGEN	30	0.715013	1.71372	0.00814664	0.0674349	0.977	3871	tags=80%, list=25%, signal=107%
GOBP_NEGATIVE_REGULATION_OF_CELL_ACTIVATION	GOBP_NEGATIVE_REGULATION_OF_CELL_ACTIVATION	190	0.593511	1.71337	0	0.0674123	0.978	3111	tags=52%, list=20%, signal=65%
GOBP_RESPONSE_TO_INTERFERON_ALPHA	GOBP_RESPONSE_TO_INTERFERON_ALPHA	19	0.684126	1.7131	0.00619835	0.067337	0.978	2982	tags=47%, list=19%, signal=59%
GOBP_REGULATION_OF_B_CELL_MEDIATED_IMMUNITY	GOBP_REGULATION_OF_B_CELL_MEDIATED_IMMUNITY	53	0.652644	1.71178	0.00814664	0.0680172	0.979	2538	tags=51%, list=17%, signal=61%
GOBP_NEGATIVE_REGULATION_OF_LEUKOCYTE_CELL_CELL_ADHESION	GOBP_NEGATIVE_REGULATION_OF_LEUKOCYTE_CELL_CELL_ADHESION	118	0.599556	1.71062	0.00823045	0.0685181	0.98	2918	tags=46%, list=19%, signal=56%
GOBP_REGULATION_OF_MONOOXYGENASE_ACTIVITY	GOBP_REGULATION_OF_MONOOXYGENASE_ACTIVITY	48	0.570428	1.71057	0.00594059	0.0683255	0.98	2783	tags=40%, list=18%, signal=48%
GOBP_TISSUE_MIGRATION	GOBP_TISSUE_MIGRATION	285	0.486376	1.7102	0	0.0683946	0.981	3409	tags=39%, list=22%, signal=49%
GOBP_NEGATIVE_REGULATION_OF_CELL_JUNCTION_ASSEMBLY	GOBP_NEGATIVE_REGULATION_OF_CELL_JUNCTION_ASSEMBLY	29	0.633279	1.71004	0.0039604	0.0682715	0.981	1988	tags=38%, list=13%, signal=43%
GOBP_NEGATIVE_REGULATION_OF_CELL_CELL_ADHESION	GOBP_NEGATIVE_REGULATION_OF_CELL_CELL_ADHESION	170	0.543928	1.70964	0.00406504	0.0682846	0.981	3187	tags=41%, list=21%, signal=51%
GOBP_OSTEOCLAST_DIFFERENTIATION	GOBP_OSTEOCLAST_DIFFERENTIATION	88	0.556356	1.7092	0.00970874	0.0683361	0.982	3880	tags=51%, list=25%, signal=68%
GOBP_REGULATION_OF_ESTABLISHMENT_OR_MAINTENANCE_OF_CELL_POLARITY	GOBP_REGULATION_OF_ESTABLISHMENT_OR_MAINTENANCE_OF_CELL_POLARITY	22	0.576541	1.70893	0.00626305	0.0683476	0.982	2452	tags=32%, list=16%, signal=38%
GOBP_LEUKOCYTE_MEDIATED_CYTOTOXICITY	GOBP_LEUKOCYTE_MEDIATED_CYTOTOXICITY	112	0.647704	1.70891	0.00404858	0.0681619	0.982	3098	tags=54%, list=20%, signal=67%
GOBP_NEGATIVE_REGULATION_OF_CELL_ADHESION	GOBP_NEGATIVE_REGULATION_OF_CELL_ADHESION	262	0.509352	1.70847	0	0.0682405	0.982	4036	tags=46%, list=26%, signal=61%
GOBP_NEGATIVE_REGULATION_OF_LYMPHOCYTE_MEDIATED_IMMUNITY	GOBP_NEGATIVE_REGULATION_OF_LYMPHOCYTE_MEDIATED_IMMUNITY	50	0.669843	1.70807	0.00614754	0.068331	0.982	3459	tags=62%, list=23%, signal=80%
GOBP_EMBRYONIC_HEMOPOIESIS	GOBP_EMBRYONIC_HEMOPOIESIS	23	0.598092	1.70807	0.00638298	0.0681246	0.982	3262	tags=43%, list=21%, signal=55%
GOBP_CELL_CELL_ADHESION_MEDIATED_BY_INTEGRIN	GOBP_CELL_CELL_ADHESION_MEDIATED_BY_INTEGRIN	15	0.720945	1.70731	0.00424628	0.0683994	0.982	2111	tags=47%, list=14%, signal=54%
GOBP_POSITIVE_REGULATION_OF_MACROPHAGE_MIGRATION	GOBP_POSITIVE_REGULATION_OF_MACROPHAGE_MIGRATION	23	0.710346	1.70684	0.00598802	0.068486	0.982	3273	tags=61%, list=21%, signal=77%
GOBP_POSITIVE_REGULATION_OF_KINASE_ACTIVITY	GOBP_POSITIVE_REGULATION_OF_KINASE_ACTIVITY	436	0.455295	1.70667	0	0.0683917	0.982	3795	tags=38%, list=25%, signal=49%
GOBP_REGULATION_OF_ENDOCYTOSIS	GOBP_REGULATION_OF_ENDOCYTOSIS	199	0.449186	1.70591	0	0.0686577	0.982	4396	tags=39%, list=29%, signal=54%
GOBP_RESPONSE_TO_TRANSFORMING_GROWTH_FACTOR_BETA	GOBP_RESPONSE_TO_TRANSFORMING_GROWTH_FACTOR_BETA	237	0.477703	1.70523	0.00202429	0.0688128	0.982	3824	tags=36%, list=25%, signal=48%
GOBP_POSITIVE_REGULATION_OF_STRESS_ACTIVATED_PROTEIN_KINASE_SIGNALING_CASCADE	GOBP_POSITIVE_REGULATION_OF_STRESS_ACTIVATED_PROTEIN_KINASE_SIGNALING_CASCADE	123	0.52458	1.70516	0	0.0686391	0.982	4068	tags=48%, list=26%, signal=65%
GOBP_POSITIVE_REGULATION_OF_PROTEIN_KINASE_ACTIVITY	GOBP_POSITIVE_REGULATION_OF_PROTEIN_KINASE_ACTIVITY	361	0.447988	1.70442	0	0.0689344	0.982	3723	tags=37%, list=24%, signal=48%
GOBP_POSITIVE_REGULATION_OF_PROTEIN_BINDING	GOBP_POSITIVE_REGULATION_OF_PROTEIN_BINDING	80	0.467739	1.70425	0.002	0.0688482	0.982	4400	tags=41%, list=29%, signal=58%
GOBP_REGULATION_OF_NATURAL_KILLER_CELL_ACTIVATION	GOBP_REGULATION_OF_NATURAL_KILLER_CELL_ACTIVATION	35	0.653886	1.70366	0.00785855	0.0690149	0.982	3270	tags=57%, list=21%, signal=72%
GOBP_REGULATION_OF_CALCIUM_ION_TRANSPORT	GOBP_REGULATION_OF_CALCIUM_ION_TRANSPORT	214	0.527517	1.70333	0	0.0689774	0.982	3737	tags=47%, list=24%, signal=61%
GOBP_SPROUTING_ANGIOGENESIS	GOBP_SPROUTING_ANGIOGENESIS	117	0.578203	1.70284	0.00199601	0.0690456	0.982	3297	tags=45%, list=21%, signal=57%
GOBP_REGULATION_OF_SUPRAMOLECULAR_FIBER_ORGANIZATION	GOBP_REGULATION_OF_SUPRAMOLECULAR_FIBER_ORGANIZATION	332	0.431335	1.70244	0.002079	0.069048	0.982	4777	tags=45%, list=31%, signal=64%
GOBP_ACTIVATION_OF_GTPASE_ACTIVITY	GOBP_ACTIVATION_OF_GTPASE_ACTIVITY	97	0.482587	1.70186	0.00423729	0.0692631	0.982	4396	tags=47%, list=29%, signal=66%
GOBP_AMYLOID_BETA_METABOLIC_PROCESS	GOBP_AMYLOID_BETA_METABOLIC_PROCESS	49	0.512382	1.70107	0.0040568	0.0695487	0.982	3209	tags=37%, list=21%, signal=46%
GOBP_MEMBRANE_PROTEIN_PROTEOLYSIS	GOBP_MEMBRANE_PROTEIN_PROTEOLYSIS	56	0.514576	1.70013	0.004	0.0699162	0.982	3127	tags=32%, list=20%, signal=40%
GOBP_REGULATION_OF_RHO_PROTEIN_SIGNAL_TRANSDUCTION	GOBP_REGULATION_OF_RHO_PROTEIN_SIGNAL_TRANSDUCTION	82	0.527298	1.70011	0.00411523	0.0697275	0.982	4398	tags=55%, list=29%, signal=76%
GOBP_CALCIUM_ION_TRANSMEMBRANE_TRANSPORT	GOBP_CALCIUM_ION_TRANSMEMBRANE_TRANSPORT	266	0.513971	1.69997	0	0.069583	0.982	2889	tags=35%, list=19%, signal=42%
GOBP_SLEEP	GOBP_SLEEP	27	0.667888	1.69975	0.00203252	0.069473	0.982	2448	tags=44%, list=16%, signal=53%
GOBP_GRANULOCYTE_ACTIVATION	GOBP_GRANULOCYTE_ACTIVATION	41	0.691622	1.69966	0.00408163	0.0693376	0.982	3098	tags=66%, list=20%, signal=82%
GOBP_LEUKOCYTE_APOPTOTIC_PROCESS	GOBP_LEUKOCYTE_APOPTOTIC_PROCESS	102	0.557755	1.6995	0.0102669	0.0692236	0.982	3796	tags=49%, list=25%, signal=65%
GOBP_REGULATION_OF_INFLAMMATORY_RESPONSE_TO_ANTIGENIC_STIMULUS	GOBP_REGULATION_OF_INFLAMMATORY_RESPONSE_TO_ANTIGENIC_STIMULUS	36	0.717194	1.6994	0.0040568	0.0690693	0.982	2249	tags=50%, list=15%, signal=58%
GOBP_REGULATION_OF_ACTIN_FILAMENT_BASED_PROCESS	GOBP_REGULATION_OF_ACTIN_FILAMENT_BASED_PROCESS	355	0.456788	1.69924	0.00402414	0.0689851	0.982	3627	tags=37%, list=24%, signal=47%
GOBP_REGULATION_OF_PROTEIN_TARGETING_TO_MEMBRANE	GOBP_REGULATION_OF_PROTEIN_TARGETING_TO_MEMBRANE	21	0.583999	1.69901	0.0141414	0.0689347	0.982	3024	tags=38%, list=20%, signal=47%
GOBP_CELL_VOLUME_HOMEOSTASIS	GOBP_CELL_VOLUME_HOMEOSTASIS	31	0.542528	1.69888	0.00425532	0.0688163	0.982	2836	tags=26%, list=18%, signal=32%
GOBP_MYOBLAST_FUSION	GOBP_MYOBLAST_FUSION	40	0.574728	1.6987	0	0.0687191	0.982	3195	tags=45%, list=21%, signal=57%
GOBP_INTERFERON_GAMMA_PRODUCTION	GOBP_INTERFERON_GAMMA_PRODUCTION	103	0.686803	1.69821	0.00614754	0.0688046	0.983	2192	tags=56%, list=14%, signal=65%
GOBP_MYELOID_LEUKOCYTE_MIGRATION	GOBP_MYELOID_LEUKOCYTE_MIGRATION	198	0.606947	1.69791	0.00403226	0.0687931	0.983	2998	tags=51%, list=20%, signal=63%
GOBP_ANGIOGENESIS_INVOLVED_IN_WOUND_HEALING	GOBP_ANGIOGENESIS_INVOLVED_IN_WOUND_HEALING	25	0.647515	1.69694	0.0063425	0.0691119	0.983	3267	tags=44%, list=21%, signal=56%
GOBP_RESPONSE_TO_INTERLEUKIN_4	GOBP_RESPONSE_TO_INTERLEUKIN_4	31	0.585004	1.69603	0.00616016	0.0694253	0.983	1970	tags=32%, list=13%, signal=37%
GOBP_TUMOR_NECROSIS_FACTOR_MEDIATED_SIGNALING_PATHWAY	GOBP_TUMOR_NECROSIS_FACTOR_MEDIATED_SIGNALING_PATHWAY	91	0.478527	1.69575	0.0119048	0.0694411	0.983	2422	tags=30%, list=16%, signal=35%
GOBP_TRANSFORMING_GROWTH_FACTOR_BETA_RECEPTOR_SIGNALING_PATHWAY	GOBP_TRANSFORMING_GROWTH_FACTOR_BETA_RECEPTOR_SIGNALING_PATHWAY	183	0.474853	1.69563	0	0.0693244	0.983	3824	tags=35%, list=25%, signal=46%
GOBP_VIRAL_GENOME_REPLICATION	GOBP_VIRAL_GENOME_REPLICATION	117	0.440963	1.69458	0.0181087	0.0697837	0.983	4606	tags=38%, list=30%, signal=55%
GOBP_POSITIVE_REGULATION_OF_PROTEIN_SERINE_THREONINE_KINASE_ACTIVITY	GOBP_POSITIVE_REGULATION_OF_PROTEIN_SERINE_THREONINE_KINASE_ACTIVITY	192	0.468821	1.6943	0.00408163	0.0697943	0.983	3409	tags=35%, list=22%, signal=45%
GOBP_POSITIVE_REGULATION_OF_CELL_MATRIX_ADHESION	GOBP_POSITIVE_REGULATION_OF_CELL_MATRIX_ADHESION	54	0.555415	1.69407	0.004158	0.0697438	0.983	3702	tags=44%, list=24%, signal=58%
GOBP_MAST_CELL_ACTIVATION	GOBP_MAST_CELL_ACTIVATION	65	0.61512	1.69401	0.0101833	0.0695887	0.983	3393	tags=54%, list=22%, signal=69%
GOBP_POSITIVE_REGULATION_OF_LEUKOCYTE_MEDIATED_IMMUNITY	GOBP_POSITIVE_REGULATION_OF_LEUKOCYTE_MEDIATED_IMMUNITY	118	0.650154	1.69356	0.0139442	0.0696892	0.983	2849	tags=52%, list=19%, signal=63%
GOBP_NEGATIVE_REGULATION_OF_BLOOD_CIRCULATION	GOBP_NEGATIVE_REGULATION_OF_BLOOD_CIRCULATION	22	0.751271	1.6932	0.00210084	0.0697345	0.984	2402	tags=59%, list=16%, signal=70%
GOBP_CELLULAR_RESPONSE_TO_LIPOPROTEIN_PARTICLE_STIMULUS	GOBP_CELLULAR_RESPONSE_TO_LIPOPROTEIN_PARTICLE_STIMULUS	30	0.648331	1.69291	0.011976	0.069683	0.984	3297	tags=53%, list=21%, signal=68%
GOBP_POSITIVE_REGULATION_OF_CELLULAR_COMPONENT_BIOGENESIS	GOBP_POSITIVE_REGULATION_OF_CELLULAR_COMPONENT_BIOGENESIS	446	0.429029	1.69277	0	0.0695861	0.984	3794	tags=33%, list=25%, signal=43%
GOBP_NEGATIVE_REGULATION_OF_INTERLEUKIN_2_PRODUCTION	GOBP_NEGATIVE_REGULATION_OF_INTERLEUKIN_2_PRODUCTION	27	0.761769	1.69232	0.002079	0.0696724	0.984	2549	tags=70%, list=17%, signal=84%
GOBP_T_CELL_APOPTOTIC_PROCESS	GOBP_T_CELL_APOPTOTIC_PROCESS	47	0.593365	1.69201	0.00414079	0.0697011	0.984	3519	tags=45%, list=23%, signal=58%
GOBP_POSITIVE_REGULATION_OF_LAMELLIPODIUM_ASSEMBLY	GOBP_POSITIVE_REGULATION_OF_LAMELLIPODIUM_ASSEMBLY	26	0.546845	1.69194	0.016	0.0695461	0.984	4777	tags=46%, list=31%, signal=67%
GOBP_POSITIVE_REGULATION_OF_DNA_BINDING_TRANSCRIPTION_FACTOR_ACTIVITY	GOBP_POSITIVE_REGULATION_OF_DNA_BINDING_TRANSCRIPTION_FACTOR_ACTIVITY	247	0.473667	1.6916	0.00203252	0.0695654	0.984	3416	tags=34%, list=22%, signal=43%
GOBP_NEGATIVE_REGULATION_OF_PROTEIN_SERINE_THREONINE_KINASE_ACTIVITY	GOBP_NEGATIVE_REGULATION_OF_PROTEIN_SERINE_THREONINE_KINASE_ACTIVITY	109	0.483958	1.69075	0	0.0699149	0.984	4729	tags=54%, list=31%, signal=78%
GOBP_PROTEIN_LOCALIZATION_TO_CELL_SURFACE	GOBP_PROTEIN_LOCALIZATION_TO_CELL_SURFACE	61	0.523059	1.69071	0.0127119	0.0697525	0.984	4781	tags=48%, list=31%, signal=69%
GOBP_T_CELL_SELECTION	GOBP_T_CELL_SELECTION	48	0.736111	1.69027	0.0139165	0.0698452	0.984	2098	tags=56%, list=14%, signal=65%
GOBP_ACTIVATION_OF_PHOSPHOLIPASE_C_ACTIVITY	GOBP_ACTIVATION_OF_PHOSPHOLIPASE_C_ACTIVITY	30	0.674901	1.68942	0.00413223	0.0701962	0.984	2675	tags=57%, list=17%, signal=68%
GOBP_DIVALENT_INORGANIC_CATION_HOMEOSTASIS	GOBP_DIVALENT_INORGANIC_CATION_HOMEOSTASIS	455	0.517608	1.68872	0	0.070573	0.984	3162	tags=38%, list=21%, signal=47%
GOBP_REGULATION_OF_LEUKOCYTE_ADHESION_TO_VASCULAR_ENDOTHELIAL_CELL	GOBP_REGULATION_OF_LEUKOCYTE_ADHESION_TO_VASCULAR_ENDOTHELIAL_CELL	29	0.713065	1.68749	0.00208768	0.0711633	0.984	2524	tags=59%, list=16%, signal=70%
GOBP_POSITIVE_REGULATION_OF_T_CELL_MEDIATED_IMMUNITY	GOBP_POSITIVE_REGULATION_OF_T_CELL_MEDIATED_IMMUNITY	52	0.673692	1.68688	0.00404858	0.0713542	0.984	2098	tags=48%, list=14%, signal=55%
GOBP_STRESS_ACTIVATED_PROTEIN_KINASE_SIGNALING_CASCADE	GOBP_STRESS_ACTIVATED_PROTEIN_KINASE_SIGNALING_CASCADE	235	0.455694	1.68644	0.0019802	0.0714258	0.984	3437	tags=34%, list=22%, signal=43%
GOBP_FC_GAMMA_RECEPTOR_SIGNALING_PATHWAY	GOBP_FC_GAMMA_RECEPTOR_SIGNALING_PATHWAY	28	0.627235	1.68631	0.0146138	0.0713048	0.985	2945	tags=50%, list=19%, signal=62%
GOBP_REGULATION_OF_CELL_KILLING	GOBP_REGULATION_OF_CELL_KILLING	90	0.686026	1.68584	0.00201613	0.0713749	0.986	3119	tags=63%, list=20%, signal=79%
GOBP_RESPONSE_TO_ISCHEMIA	GOBP_RESPONSE_TO_ISCHEMIA	48	0.531678	1.68568	0.00590551	0.0712636	0.986	2949	tags=35%, list=19%, signal=44%
GOBP_ACTIN_FILAMENT_POLYMERIZATION	GOBP_ACTIN_FILAMENT_POLYMERIZATION	144	0.472867	1.68563	0.00823045	0.0711237	0.986	2920	tags=35%, list=19%, signal=42%
GOBP_POSITIVE_REGULATION_OF_PROTEOLYSIS_INVOLVED_IN_CELLULAR_PROTEIN_CATABOLIC_PROCESS	GOBP_POSITIVE_REGULATION_OF_PROTEOLYSIS_INVOLVED_IN_CELLULAR_PROTEIN_CATABOLIC_PROCESS	122	0.350989	1.68515	0.00626305	0.0711668	0.986	2088	tags=16%, list=14%, signal=19%
GOBP_REGULATION_OF_FEEDING_BEHAVIOR	GOBP_REGULATION_OF_FEEDING_BEHAVIOR	23	0.682156	1.68502	0	0.0710569	0.986	1528	tags=35%, list=10%, signal=39%
GOBP_POSITIVE_REGULATION_OF_MACROPHAGE_CHEMOTAXIS	GOBP_POSITIVE_REGULATION_OF_MACROPHAGE_CHEMOTAXIS	17	0.670914	1.68498	0.0181087	0.0708936	0.986	3273	tags=59%, list=21%, signal=75%
GOBP_REGULATION_OF_MAST_CELL_ACTIVATION_INVOLVED_IN_IMMUNE_RESPONSE	GOBP_REGULATION_OF_MAST_CELL_ACTIVATION_INVOLVED_IN_IMMUNE_RESPONSE	32	0.6115	1.68476	0.00614754	0.0708315	0.986	3950	tags=56%, list=26%, signal=76%
GOBP_CELLULAR_RESPONSE_TO_MECHANICAL_STIMULUS	GOBP_CELLULAR_RESPONSE_TO_MECHANICAL_STIMULUS	68	0.535633	1.68345	0.00408998	0.0714697	0.987	3098	tags=43%, list=20%, signal=53%
GOBP_POSITIVE_REGULATION_OF_PHOSPHATIDYLINOSITOL_3_KINASE_SIGNALING	GOBP_POSITIVE_REGULATION_OF_PHOSPHATIDYLINOSITOL_3_KINASE_SIGNALING	74	0.61643	1.68294	0.00203252	0.0716985	0.988	3807	tags=59%, list=25%, signal=79%
GOBP_REGULATION_OF_MYOBLAST_DIFFERENTIATION	GOBP_REGULATION_OF_MYOBLAST_DIFFERENTIATION	50	0.577891	1.68239	0.0019685	0.0719004	0.988	2895	tags=42%, list=19%, signal=52%
GOBP_CD4_POSITIVE_ALPHA_BETA_T_CELL_ACTIVATION	GOBP_CD4_POSITIVE_ALPHA_BETA_T_CELL_ACTIVATION	90	0.627813	1.68174	0.0203252	0.072157	0.988	3306	tags=54%, list=22%, signal=69%
GOBP_NEGATIVE_REGULATION_OF_PROTEIN_KINASE_B_SIGNALING	GOBP_NEGATIVE_REGULATION_OF_PROTEIN_KINASE_B_SIGNALING	37	0.538837	1.68169	0.0120724	0.0719803	0.988	4748	tags=49%, list=31%, signal=70%
GOBP_REGULATION_OF_LEUKOCYTE_MEDIATED_CYTOTOXICITY	GOBP_REGULATION_OF_LEUKOCYTE_MEDIATED_CYTOTOXICITY	72	0.703607	1.68155	0.00595238	0.0718643	0.988	1916	tags=51%, list=12%, signal=58%
GOBP_REGULATION_OF_PROTEIN_LOCALIZATION_TO_PLASMA_MEMBRANE	GOBP_REGULATION_OF_PROTEIN_LOCALIZATION_TO_PLASMA_MEMBRANE	96	0.452255	1.68131	0.00197628	0.0718032	0.988	3301	tags=32%, list=21%, signal=41%
GOBP_ALPHA_BETA_T_CELL_DIFFERENTIATION	GOBP_ALPHA_BETA_T_CELL_DIFFERENTIATION	104	0.629478	1.68085	0.0206186	0.0719401	0.988	3306	tags=55%, list=22%, signal=69%
GOBP_CALCIUM_ION_IMPORT_INTO_CYTOSOL	GOBP_CALCIUM_ION_IMPORT_INTO_CYTOSOL	21	0.676	1.68052	0.00197628	0.072007	0.988	2580	tags=52%, list=17%, signal=63%
GOBP_POSITIVE_REGULATION_OF_CYTOKINE_PRODUCTION_INVOLVED_IN_IMMUNE_RESPONSE	GOBP_POSITIVE_REGULATION_OF_CYTOKINE_PRODUCTION_INVOLVED_IN_IMMUNE_RESPONSE	63	0.598875	1.68043	0.0103734	0.0718841	0.988	3875	tags=56%, list=25%, signal=74%
GOBP_NEGATIVE_REGULATION_OF_ALPHA_BETA_T_CELL_DIFFERENTIATION	GOBP_NEGATIVE_REGULATION_OF_ALPHA_BETA_T_CELL_DIFFERENTIATION	24	0.634203	1.68024	0.0265306	0.0718273	0.988	3075	tags=46%, list=20%, signal=57%
GOBP_MEMBRANE_RAFT_ORGANIZATION	GOBP_MEMBRANE_RAFT_ORGANIZATION	23	0.604907	1.6802	0.025	0.0716637	0.988	4384	tags=65%, list=29%, signal=91%
GOBP_RUFFLE_ORGANIZATION	GOBP_RUFFLE_ORGANIZATION	52	0.498977	1.67998	0.00790514	0.0716049	0.988	1737	tags=25%, list=11%, signal=28%
GOBP_REGULATION_OF_DEFENSE_RESPONSE_TO_VIRUS	GOBP_REGULATION_OF_DEFENSE_RESPONSE_TO_VIRUS	62	0.564485	1.67996	0.0201207	0.0714395	0.988	4606	tags=52%, list=30%, signal=73%
GOBP_INTERLEUKIN_8_PRODUCTION	GOBP_INTERLEUKIN_8_PRODUCTION	76	0.597383	1.67959	0.00619835	0.0714923	0.988	3693	tags=54%, list=24%, signal=71%
GOBP_REGULATION_OF_PHOSPHOLIPASE_C_ACTIVITY	GOBP_REGULATION_OF_PHOSPHOLIPASE_C_ACTIVITY	43	0.637368	1.67925	0	0.0715427	0.988	2675	tags=49%, list=17%, signal=59%
GOBP_POSITIVE_REGULATION_OF_SMALL_GTPASE_MEDIATED_SIGNAL_TRANSDUCTION	GOBP_POSITIVE_REGULATION_OF_SMALL_GTPASE_MEDIATED_SIGNAL_TRANSDUCTION	66	0.562168	1.67922	0.00385356	0.0713757	0.988	3419	tags=47%, list=22%, signal=60%
GOBP_POSITIVE_REGULATION_OF_STEROL_TRANSPORT	GOBP_POSITIVE_REGULATION_OF_STEROL_TRANSPORT	36	0.617124	1.67894	0.00196464	0.0713451	0.988	4501	tags=61%, list=29%, signal=86%
GOBP_CELLULAR_RESPONSE_TO_EXOGENOUS_DSRNA	GOBP_CELLULAR_RESPONSE_TO_EXOGENOUS_DSRNA	15	0.65132	1.67888	0.025	0.0711967	0.988	2323	tags=33%, list=15%, signal=39%
GOBP_REGULATION_OF_SUPEROXIDE_METABOLIC_PROCESS	GOBP_REGULATION_OF_SUPEROXIDE_METABOLIC_PROCESS	28	0.639762	1.67837	0.020284	0.0713233	0.988	4645	tags=71%, list=30%, signal=102%
GOBP_LYMPH_VESSEL_DEVELOPMENT	GOBP_LYMPH_VESSEL_DEVELOPMENT	29	0.66989	1.67825	0.0102459	0.071242	0.988	3850	tags=66%, list=25%, signal=87%
GOBP_REACTIVE_OXYGEN_SPECIES_METABOLIC_PROCESS	GOBP_REACTIVE_OXYGEN_SPECIES_METABOLIC_PROCESS	197	0.468679	1.67774	0	0.071353	0.989	3295	tags=36%, list=21%, signal=45%
GOBP_POSITIVE_REGULATION_OF_PROTEIN_KINASE_B_SIGNALING	GOBP_POSITIVE_REGULATION_OF_PROTEIN_KINASE_B_SIGNALING	100	0.554581	1.67771	0.00208768	0.0711842	0.989	2675	tags=38%, list=17%, signal=46%
GOBP_POSITIVE_REGULATION_OF_MAPK_CASCADE	GOBP_POSITIVE_REGULATION_OF_MAPK_CASCADE	427	0.498421	1.67749	0	0.0711267	0.989	3463	tags=42%, list=23%, signal=52%
GOBP_MAST_CELL_ACTIVATION_INVOLVED_IN_IMMUNE_RESPONSE	GOBP_MAST_CELL_ACTIVATION_INVOLVED_IN_IMMUNE_RESPONSE	52	0.595944	1.67677	0.00623701	0.0714296	0.989	3104	tags=48%, list=20%, signal=60%
GOBP_REGULATION_OF_MACROPHAGE_CHEMOTAXIS	GOBP_REGULATION_OF_MACROPHAGE_CHEMOTAXIS	24	0.655989	1.67669	0.00806452	0.0712936	0.989	3273	tags=54%, list=21%, signal=69%
GOBP_RESPONSE_TO_REACTIVE_OXYGEN_SPECIES	GOBP_RESPONSE_TO_REACTIVE_OXYGEN_SPECIES	176	0.427249	1.67644	0.00406504	0.0712857	0.989	2794	tags=27%, list=18%, signal=33%
GOBP_REGULATION_OF_LIPASE_ACTIVITY	GOBP_REGULATION_OF_LIPASE_ACTIVITY	85	0.555821	1.67638	0.00202429	0.0711512	0.989	3093	tags=44%, list=20%, signal=54%
GOBP_THYMIC_T_CELL_SELECTION	GOBP_THYMIC_T_CELL_SELECTION	22	0.74024	1.67611	0.0141414	0.0711478	0.989	1165	tags=45%, list=8%, signal=49%
GOBP_ACTIN_FILAMENT_BUNDLE_ORGANIZATION	GOBP_ACTIN_FILAMENT_BUNDLE_ORGANIZATION	148	0.449083	1.67601	0.00402414	0.0710311	0.989	4437	tags=43%, list=29%, signal=59%
GOBP_PROTEIN_AUTOPHOSPHORYLATION	GOBP_PROTEIN_AUTOPHOSPHORYLATION	216	0.393613	1.67577	0	0.0709959	0.989	3759	tags=33%, list=24%, signal=43%
GOBP_POSITIVE_REGULATION_OF_NATURAL_KILLER_CELL_ACTIVATION	GOBP_POSITIVE_REGULATION_OF_NATURAL_KILLER_CELL_ACTIVATION	22	0.702595	1.67572	0.00986193	0.0708612	0.989	3128	tags=64%, list=20%, signal=80%
GOBP_NEGATIVE_REGULATION_OF_PROTEIN_ACETYLATION	GOBP_NEGATIVE_REGULATION_OF_PROTEIN_ACETYLATION	21	0.544514	1.67532	0.0102669	0.0709492	0.99	2702	tags=24%, list=18%, signal=29%
GOBP_SEQUESTERING_OF_CALCIUM_ION	GOBP_SEQUESTERING_OF_CALCIUM_ION	113	0.573052	1.67529	0	0.0707905	0.99	2889	tags=45%, list=19%, signal=55%
GOBP_MUSCLE_ADAPTATION	GOBP_MUSCLE_ADAPTATION	96	0.512355	1.67463	0.00399202	0.0710291	0.99	3627	tags=39%, list=24%, signal=50%
GOBP_NEUROINFLAMMATORY_RESPONSE	GOBP_NEUROINFLAMMATORY_RESPONSE	34	0.727647	1.67422	0.00192678	0.0710803	0.99	2927	tags=71%, list=19%, signal=87%
GOBP_POSITIVE_REGULATION_OF_PROTEIN_DEPHOSPHORYLATION	GOBP_POSITIVE_REGULATION_OF_PROTEIN_DEPHOSPHORYLATION	41	0.535541	1.67359	0.0123457	0.0713041	0.99	3538	tags=44%, list=23%, signal=57%
GOBP_CORONARY_VASCULATURE_DEVELOPMENT	GOBP_CORONARY_VASCULATURE_DEVELOPMENT	43	0.599303	1.67248	0.00205339	0.0717942	0.99	3440	tags=51%, list=22%, signal=66%
GOBP_POSITIVE_REGULATION_OF_SUPRAMOLECULAR_FIBER_ORGANIZATION	GOBP_POSITIVE_REGULATION_OF_SUPRAMOLECULAR_FIBER_ORGANIZATION	160	0.458092	1.67229	0.00414938	0.0717378	0.99	4970	tags=46%, list=32%, signal=68%
GOBP_REGULATION_OF_TUMOR_NECROSIS_FACTOR_MEDIATED_SIGNALING_PATHWAY	GOBP_REGULATION_OF_TUMOR_NECROSIS_FACTOR_MEDIATED_SIGNALING_PATHWAY	46	0.464416	1.67216	0.00769231	0.0717024	0.99	2422	tags=26%, list=16%, signal=31%
GOBP_CELLULAR_RESPONSE_TO_INTERFERON_GAMMA	GOBP_CELLULAR_RESPONSE_TO_INTERFERON_GAMMA	98	0.615703	1.67209	0.00642398	0.0715759	0.99	3096	tags=48%, list=20%, signal=60%
GOBP_ALPHA_BETA_T_CELL_PROLIFERATION	GOBP_ALPHA_BETA_T_CELL_PROLIFERATION	34	0.686807	1.67205	0.0119522	0.0714284	0.99	3128	tags=62%, list=20%, signal=77%
GOBP_RELEASE_OF_SEQUESTERED_CALCIUM_ION_INTO_CYTOSOL_BY_ENDOPLASMIC_RETICULUM	GOBP_RELEASE_OF_SEQUESTERED_CALCIUM_ION_INTO_CYTOSOL_BY_ENDOPLASMIC_RETICULUM	31	0.691926	1.67194	0	0.0713258	0.99	1711	tags=45%, list=11%, signal=51%
GOBP_MAINTENANCE_OF_LOCATION_IN_CELL	GOBP_MAINTENANCE_OF_LOCATION_IN_CELL	198	0.481465	1.67182	0	0.0712151	0.99	3737	tags=39%, list=24%, signal=51%
GOBP_CELL_JUNCTION_DISASSEMBLY	GOBP_CELL_JUNCTION_DISASSEMBLY	21	0.69774	1.67145	0.00408163	0.0712651	0.99	3002	tags=57%, list=20%, signal=71%
GOBP_POSITIVE_REGULATION_OF_ORGAN_GROWTH	GOBP_POSITIVE_REGULATION_OF_ORGAN_GROWTH	40	0.630014	1.67133	0.00608519	0.0712203	0.99	2516	tags=45%, list=16%, signal=54%
GOBP_INTERLEUKIN_6_MEDIATED_SIGNALING_PATHWAY	GOBP_INTERLEUKIN_6_MEDIATED_SIGNALING_PATHWAY	18	0.645815	1.6713	0.012474	0.0710637	0.99	2098	tags=39%, list=14%, signal=45%
GOBP_INTERLEUKIN_5_PRODUCTION	GOBP_INTERLEUKIN_5_PRODUCTION	18	0.692273	1.67084	0.00618557	0.0711889	0.991	1996	tags=44%, list=13%, signal=51%
GOBP_LEUKOCYTE_TETHERING_OR_ROLLING	GOBP_LEUKOCYTE_TETHERING_OR_ROLLING	33	0.723835	1.67081	0.00209644	0.0710284	0.991	2524	tags=61%, list=16%, signal=72%
GOBP_POSITIVE_REGULATION_OF_ERK1_AND_ERK2_CASCADE	GOBP_POSITIVE_REGULATION_OF_ERK1_AND_ERK2_CASCADE	178	0.564547	1.67061	0	0.0709571	0.991	3419	tags=51%, list=22%, signal=64%
GOBP_POSITIVE_REGULATION_OF_CELLULAR_PROTEIN_CATABOLIC_PROCESS	GOBP_POSITIVE_REGULATION_OF_CELLULAR_PROTEIN_CATABOLIC_PROCESS	143	0.360734	1.67049	0.00627615	0.070865	0.991	3990	tags=28%, list=26%, signal=37%
GOBP_RESPONSE_TO_INTERFERON_GAMMA	GOBP_RESPONSE_TO_INTERFERON_GAMMA	118	0.590225	1.67038	0.0103306	0.0707733	0.991	3096	tags=45%, list=20%, signal=56%
GOBP_NEGATIVE_REGULATION_OF_ION_TRANSMEMBRANE_TRANSPORTER_ACTIVITY	GOBP_NEGATIVE_REGULATION_OF_ION_TRANSMEMBRANE_TRANSPORTER_ACTIVITY	60	0.582086	1.67034	0.00408163	0.0706479	0.991	3269	tags=40%, list=21%, signal=51%
GOBP_NEGATIVE_REGULATION_OF_PROTEIN_MODIFICATION_PROCESS	GOBP_NEGATIVE_REGULATION_OF_PROTEIN_MODIFICATION_PROCESS	450	0.374015	1.66961	0	0.0709714	0.991	4678	tags=38%, list=30%, signal=54%
GOBP_CELLULAR_DEFENSE_RESPONSE	GOBP_CELLULAR_DEFENSE_RESPONSE	48	0.714533	1.66957	0.004158	0.070842	0.991	2250	tags=54%, list=15%, signal=63%
GOBP_REGULATION_OF_MAP_KINASE_ACTIVITY	GOBP_REGULATION_OF_MAP_KINASE_ACTIVITY	179	0.493982	1.66936	0.00204082	0.0708451	0.992	3441	tags=40%, list=22%, signal=51%
GOBP_B_CELL_ACTIVATION_INVOLVED_IN_IMMUNE_RESPONSE	GOBP_B_CELL_ACTIVATION_INVOLVED_IN_IMMUNE_RESPONSE	78	0.566651	1.66908	0.0322581	0.0708884	0.992	2605	tags=38%, list=17%, signal=46%
GOBP_NEGATIVE_REGULATION_OF_CELLULAR_RESPONSE_TO_GROWTH_FACTOR_STIMULUS	GOBP_NEGATIVE_REGULATION_OF_CELLULAR_RESPONSE_TO_GROWTH_FACTOR_STIMULUS	92	0.565273	1.66874	0.00195695	0.0710113	0.993	3275	tags=39%, list=21%, signal=49%
GOBP_PROTEIN_DESTABILIZATION	GOBP_PROTEIN_DESTABILIZATION	40	0.418622	1.6685	0.0243902	0.0709675	0.993	4497	tags=43%, list=29%, signal=60%
GOBP_REGULATION_OF_RESPONSE_TO_OXIDATIVE_STRESS	GOBP_REGULATION_OF_RESPONSE_TO_OXIDATIVE_STRESS	81	0.471831	1.6682	0.00196078	0.0710051	0.993	2173	tags=23%, list=14%, signal=27%
GOBP_MONOCYTE_CHEMOTACTIC_PROTEIN_1_PRODUCTION	GOBP_MONOCYTE_CHEMOTACTIC_PROTEIN_1_PRODUCTION	17	0.742094	1.66819	0.00596422	0.0708456	0.993	2788	tags=53%, list=18%, signal=65%
GOBP_ANTIGEN_PROCESSING_AND_PRESENTATION_OF_EXOGENOUS_ANTIGEN	GOBP_ANTIGEN_PROCESSING_AND_PRESENTATION_OF_EXOGENOUS_ANTIGEN	39	0.724688	1.66818	0.0122951	0.0706867	0.993	3294	tags=69%, list=21%, signal=88%
GOBP_POSITIVE_REGULATION_OF_CYTOSKELETON_ORGANIZATION	GOBP_POSITIVE_REGULATION_OF_CYTOSKELETON_ORGANIZATION	179	0.450829	1.66786	0	0.0706994	0.993	2593	tags=26%, list=17%, signal=31%
GOBP_NEGATIVE_REGULATION_OF_AUTOPHAGOSOME_ASSEMBLY	GOBP_NEGATIVE_REGULATION_OF_AUTOPHAGOSOME_ASSEMBLY	15	0.551728	1.66703	0.0229167	0.0709455	0.993	2293	tags=27%, list=15%, signal=31%
GOBP_PHAGOCYTOSIS_RECOGNITION	GOBP_PHAGOCYTOSIS_RECOGNITION	25	0.723331	1.66696	0.0021097	0.0708197	0.993	1869	tags=44%, list=12%, signal=50%
GOBP_POSITIVE_REGULATION_OF_PROTEIN_POLYMERIZATION	GOBP_POSITIVE_REGULATION_OF_PROTEIN_POLYMERIZATION	85	0.458626	1.66639	0.0122699	0.0709946	0.993	2739	tags=27%, list=18%, signal=33%
GOBP_POSITIVE_REGULATION_OF_INTERFERON_GAMMA_PRODUCTION	GOBP_POSITIVE_REGULATION_OF_INTERFERON_GAMMA_PRODUCTION	70	0.708111	1.66633	0.00622407	0.0708816	0.993	2184	tags=57%, list=14%, signal=66%
GOBP_NEGATIVE_REGULATION_OF_ALPHA_BETA_T_CELL_ACTIVATION	GOBP_NEGATIVE_REGULATION_OF_ALPHA_BETA_T_CELL_ACTIVATION	34	0.605322	1.66619	0.0240481	0.0707791	0.993	3075	tags=47%, list=20%, signal=59%
GOBP_REGULATION_OF_HUMORAL_IMMUNE_RESPONSE	GOBP_REGULATION_OF_HUMORAL_IMMUNE_RESPONSE	42	0.667483	1.66596	0.00196078	0.0707419	0.993	3160	tags=64%, list=21%, signal=81%
GOBP_POSITIVE_REGULATION_OF_PLASMA_MEMBRANE_BOUNDED_CELL_PROJECTION_ASSEMBLY	GOBP_POSITIVE_REGULATION_OF_PLASMA_MEMBRANE_BOUNDED_CELL_PROJECTION_ASSEMBLY	94	0.460143	1.6652	0.0077821	0.0710942	0.994	3677	tags=34%, list=24%, signal=44%
GOBP_REGULATION_OF_CELLULAR_RESPONSE_TO_GROWTH_FACTOR_STIMULUS	GOBP_REGULATION_OF_CELLULAR_RESPONSE_TO_GROWTH_FACTOR_STIMULUS	268	0.504437	1.66499	0.00204082	0.0710754	0.994	3419	tags=35%, list=22%, signal=44%
GOBP_MEMBRANE_PROTEIN_ECTODOMAIN_PROTEOLYSIS	GOBP_MEMBRANE_PROTEIN_ECTODOMAIN_PROTEOLYSIS	45	0.537057	1.66472	0.00598802	0.071102	0.994	3127	tags=33%, list=20%, signal=42%
GOBP_REGULATION_OF_CARDIAC_MUSCLE_CELL_PROLIFERATION	GOBP_REGULATION_OF_CARDIAC_MUSCLE_CELL_PROLIFERATION	36	0.613328	1.66441	0.0101215	0.0711458	0.994	3543	tags=50%, list=23%, signal=65%
GOBP_POSITIVE_REGULATION_OF_VASCULAR_ENDOTHELIAL_CELL_PROLIFERATION	GOBP_POSITIVE_REGULATION_OF_VASCULAR_ENDOTHELIAL_CELL_PROLIFERATION	15	0.639875	1.6641	0.00396825	0.0711426	0.994	2335	tags=27%, list=15%, signal=31%
GOBP_T_CELL_MEDIATED_CYTOTOXICITY	GOBP_T_CELL_MEDIATED_CYTOTOXICITY	44	0.705027	1.66366	0.00399202	0.0712343	0.994	3062	tags=66%, list=20%, signal=82%
GOBP_REGULATION_OF_CD4_POSITIVE_ALPHA_BETA_T_CELL_ACTIVATION	GOBP_REGULATION_OF_CD4_POSITIVE_ALPHA_BETA_T_CELL_ACTIVATION	56	0.674703	1.66324	0.0104603	0.0713268	0.994	3090	tags=57%, list=20%, signal=71%
GOBP_NEGATIVE_REGULATION_OF_DNA_BINDING_TRANSCRIPTION_FACTOR_ACTIVITY	GOBP_NEGATIVE_REGULATION_OF_DNA_BINDING_TRANSCRIPTION_FACTOR_ACTIVITY	154	0.435152	1.6625	0	0.0715628	0.994	3569	tags=36%, list=23%, signal=47%
GOBP_TYROSINE_PHOSPHORYLATION_OF_STAT_PROTEIN	GOBP_TYROSINE_PHOSPHORYLATION_OF_STAT_PROTEIN	73	0.573306	1.66193	0	0.0717679	0.994	2585	tags=38%, list=17%, signal=46%
GOBP_ENDOTHELIUM_DEVELOPMENT	GOBP_ENDOTHELIUM_DEVELOPMENT	123	0.498637	1.66013	0.0102881	0.0726557	0.994	3899	tags=45%, list=25%, signal=59%
GOBP_DENDRITIC_CELL_MIGRATION	GOBP_DENDRITIC_CELL_MIGRATION	31	0.753261	1.65946	0.00614754	0.0729331	0.994	1793	tags=55%, list=12%, signal=62%
GOBP_REGULATION_OF_LEUKOCYTE_APOPTOTIC_PROCESS	GOBP_REGULATION_OF_LEUKOCYTE_APOPTOTIC_PROCESS	79	0.562941	1.65944	0.00819672	0.0727905	0.994	3796	tags=54%, list=25%, signal=72%
GOBP_CELL_SUBSTRATE_JUNCTION_ORGANIZATION	GOBP_CELL_SUBSTRATE_JUNCTION_ORGANIZATION	96	0.484118	1.65897	0.016129	0.0729112	0.994	4817	tags=48%, list=31%, signal=69%
GOBP_NEGATIVE_REGULATION_OF_I_KAPPAB_KINASE_NF_KAPPAB_SIGNALING	GOBP_NEGATIVE_REGULATION_OF_I_KAPPAB_KINASE_NF_KAPPAB_SIGNALING	42	0.522242	1.65872	0.0141414	0.0729178	0.994	4667	tags=45%, list=30%, signal=65%
GOBP_N_GLYCAN_PROCESSING	GOBP_N_GLYCAN_PROCESSING	18	0.624342	1.65862	0.0116959	0.0728439	0.994	2318	tags=28%, list=15%, signal=33%
GOBP_B_CELL_RECEPTOR_SIGNALING_PATHWAY	GOBP_B_CELL_RECEPTOR_SIGNALING_PATHWAY	53	0.741091	1.65844	0.00809717	0.0728082	0.994	3104	tags=70%, list=20%, signal=87%
GOBP_DENDRITIC_CELL_DIFFERENTIATION	GOBP_DENDRITIC_CELL_DIFFERENTIATION	44	0.648419	1.65816	0.00838574	0.0728597	0.994	4333	tags=70%, list=28%, signal=98%
GOBP_REGULATION_OF_NITRIC_OXIDE_SYNTHASE_ACTIVITY	GOBP_REGULATION_OF_NITRIC_OXIDE_SYNTHASE_ACTIVITY	35	0.58441	1.65776	0.00817996	0.0729466	0.994	2703	tags=40%, list=18%, signal=48%
GOBP_POSITIVE_REGULATION_OF_EPITHELIAL_CELL_APOPTOTIC_PROCESS	GOBP_POSITIVE_REGULATION_OF_EPITHELIAL_CELL_APOPTOTIC_PROCESS	26	0.664661	1.6574	0.0104822	0.0730465	0.994	3358	tags=58%, list=22%, signal=74%
GOBP_REGULATION_OF_CELL_MATRIX_ADHESION	GOBP_REGULATION_OF_CELL_MATRIX_ADHESION	115	0.478563	1.65725	0	0.0730124	0.994	3844	tags=38%, list=25%, signal=51%
GOBP_NEUROTROPHIN_SIGNALING_PATHWAY	GOBP_NEUROTROPHIN_SIGNALING_PATHWAY	36	0.614231	1.65627	0.0176817	0.0734033	0.994	3591	tags=50%, list=23%, signal=65%
GOBP_B_CELL_ACTIVATION	GOBP_B_CELL_ACTIVATION	243	0.533147	1.65618	0.0244898	0.0733245	0.994	3474	tags=42%, list=23%, signal=54%
GOBP_POSITIVE_REGULATION_OF_INTERLEUKIN_8_PRODUCTION	GOBP_POSITIVE_REGULATION_OF_INTERLEUKIN_8_PRODUCTION	58	0.60055	1.65603	0.00840336	0.0732776	0.994	2468	tags=41%, list=16%, signal=49%
GOBP_ERK1_AND_ERK2_CASCADE	GOBP_ERK1_AND_ERK2_CASCADE	283	0.506432	1.65554	0	0.0734693	0.994	3794	tags=47%, list=25%, signal=62%
GOBP_REGULATION_OF_CELL_PROJECTION_ASSEMBLY	GOBP_REGULATION_OF_CELL_PROJECTION_ASSEMBLY	198	0.396573	1.65553	0.00591716	0.073324	0.994	4810	tags=40%, list=31%, signal=57%
GOBP_POSITIVE_T_CELL_SELECTION	GOBP_POSITIVE_T_CELL_SELECTION	35	0.747759	1.65548	0.0178218	0.0732132	0.994	2098	tags=57%, list=14%, signal=66%
GOBP_NEGATIVE_REGULATION_OF_OSTEOCLAST_DIFFERENTIATION	GOBP_NEGATIVE_REGULATION_OF_OSTEOCLAST_DIFFERENTIATION	27	0.650144	1.6549	0.0101215	0.0734791	0.994	3036	tags=48%, list=20%, signal=60%
GOBP_SARCOPLASMIC_RETICULUM_CALCIUM_ION_TRANSPORT	GOBP_SARCOPLASMIC_RETICULUM_CALCIUM_ION_TRANSPORT	35	0.664519	1.65486	0	0.0733524	0.994	1711	tags=40%, list=11%, signal=45%
GOBP_POSITIVE_REGULATION_OF_LEUKOCYTE_ADHESION_TO_VASCULAR_ENDOTHELIAL_CELL	GOBP_POSITIVE_REGULATION_OF_LEUKOCYTE_ADHESION_TO_VASCULAR_ENDOTHELIAL_CELL	22	0.72028	1.65478	0	0.0732557	0.994	3313	tags=68%, list=22%, signal=87%
GOBP_ENDOCARDIAL_CUSHION_DEVELOPMENT	GOBP_ENDOCARDIAL_CUSHION_DEVELOPMENT	49	0.636991	1.65453	0.00421941	0.0732269	0.994	4533	tags=67%, list=30%, signal=95%
GOBP_MONOCYTE_DIFFERENTIATION	GOBP_MONOCYTE_DIFFERENTIATION	32	0.582731	1.65444	0.0145228	0.0731461	0.994	2244	tags=38%, list=15%, signal=44%
GOBP_REGULATION_OF_MEMBRANE_INVAGINATION	GOBP_REGULATION_OF_MEMBRANE_INVAGINATION	15	0.738477	1.65441	0.00796813	0.073014	0.994	2885	tags=73%, list=19%, signal=90%
GOBP_POSITIVE_REGULATION_OF_MYELINATION	GOBP_POSITIVE_REGULATION_OF_MYELINATION	15	0.718446	1.65354	0.00195312	0.0733816	0.995	1929	tags=47%, list=13%, signal=53%
GOBP_ESTABLISHMENT_OF_ENDOTHELIAL_BARRIER	GOBP_ESTABLISHMENT_OF_ENDOTHELIAL_BARRIER	51	0.520361	1.65353	0.00814664	0.0732392	0.995	4088	tags=51%, list=27%, signal=69%
GOBP_POSITIVE_REGULATION_OF_NITRIC_OXIDE_METABOLIC_PROCESS	GOBP_POSITIVE_REGULATION_OF_NITRIC_OXIDE_METABOLIC_PROCESS	38	0.628791	1.65294	0.0020202	0.0734212	0.995	3294	tags=55%, list=21%, signal=70%
GOBP_NEGATIVE_REGULATION_OF_HISTONE_ACETYLATION	GOBP_NEGATIVE_REGULATION_OF_HISTONE_ACETYLATION	16	0.597878	1.65291	0.0185185	0.0732916	0.995	1996	tags=25%, list=13%, signal=29%
GOBP_BIOLOGICAL_PROCESS_INVOLVED_IN_SYMBIOTIC_INTERACTION	GOBP_BIOLOGICAL_PROCESS_INVOLVED_IN_SYMBIOTIC_INTERACTION	256	0.432591	1.65287	0	0.0731489	0.995	3171	tags=28%, list=21%, signal=34%
GOBP_REGULATION_OF_CALCIUM_ION_TRANSMEMBRANE_TRANSPORT	GOBP_REGULATION_OF_CALCIUM_ION_TRANSMEMBRANE_TRANSPORT	132	0.537701	1.65268	0	0.0731254	0.995	2889	tags=40%, list=19%, signal=49%
GOBP_POSITIVE_REGULATION_OF_LYMPHOCYTE_MIGRATION	GOBP_POSITIVE_REGULATION_OF_LYMPHOCYTE_MIGRATION	32	0.663837	1.65263	0.0119522	0.0730076	0.995	2532	tags=50%, list=16%, signal=60%
GOBP_LAMELLIPODIUM_ASSEMBLY	GOBP_LAMELLIPODIUM_ASSEMBLY	65	0.47171	1.65258	0.0116959	0.0728873	0.995	3811	tags=40%, list=25%, signal=53%
GOBP_IMMUNOGLOBULIN_PRODUCTION_INVOLVED_IN_IMMUNOGLOBULIN_MEDIATED_IMMUNE_RESPONSE	GOBP_IMMUNOGLOBULIN_PRODUCTION_INVOLVED_IN_IMMUNOGLOBULIN_MEDIATED_IMMUNE_RESPONSE	60	0.611526	1.65235	0.0172043	0.0728372	0.995	2078	tags=38%, list=14%, signal=44%
GOBP_REGULATION_OF_FILOPODIUM_ASSEMBLY	GOBP_REGULATION_OF_FILOPODIUM_ASSEMBLY	41	0.51499	1.65137	0.011976	0.0733155	0.995	2486	tags=24%, list=16%, signal=29%
GOBP_REGULATION_OF_T_CELL_DIFFERENTIATION_IN_THYMUS	GOBP_REGULATION_OF_T_CELL_DIFFERENTIATION_IN_THYMUS	23	0.659407	1.65122	0.0103306	0.0732552	0.995	2776	tags=43%, list=18%, signal=53%
GOBP_LAMELLIPODIUM_ORGANIZATION	GOBP_LAMELLIPODIUM_ORGANIZATION	81	0.447426	1.65106	0.008	0.0732122	0.995	4243	tags=44%, list=28%, signal=61%
GOBP_NEGATIVE_REGULATION_OF_NUCLEOTIDE_METABOLIC_PROCESS	GOBP_NEGATIVE_REGULATION_OF_NUCLEOTIDE_METABOLIC_PROCESS	19	0.602065	1.65087	0.0159681	0.0731488	0.995	3047	tags=26%, list=20%, signal=33%
GOBP_POLYSACCHARIDE_CATABOLIC_PROCESS	GOBP_POLYSACCHARIDE_CATABOLIC_PROCESS	18	0.630683	1.65046	0.00404858	0.0732388	0.995	2442	tags=33%, list=16%, signal=40%
GOBP_REGULATION_OF_CELLULAR_RESPONSE_TO_TRANSFORMING_GROWTH_FACTOR_BETA_STIMULUS	GOBP_REGULATION_OF_CELLULAR_RESPONSE_TO_TRANSFORMING_GROWTH_FACTOR_BETA_STIMULUS	118	0.479854	1.64988	0.00398406	0.0735273	0.995	3385	tags=33%, list=22%, signal=42%
GOBP_POSITIVE_REGULATION_OF_CELL_PROJECTION_ORGANIZATION	GOBP_POSITIVE_REGULATION_OF_CELL_PROJECTION_ORGANIZATION	309	0.440263	1.64967	0	0.0735149	0.995	3750	tags=35%, list=24%, signal=45%
GOBP_CD4_POSITIVE_ALPHA_BETA_T_CELL_DIFFERENTIATION	GOBP_CD4_POSITIVE_ALPHA_BETA_T_CELL_DIFFERENTIATION	76	0.629043	1.64961	0.0205339	0.0734015	0.995	3306	tags=55%, list=22%, signal=70%
GOBP_NEGATIVE_REGULATION_OF_T_CELL_DIFFERENTIATION	GOBP_NEGATIVE_REGULATION_OF_T_CELL_DIFFERENTIATION	41	0.586416	1.64941	0.0165631	0.073379	0.995	2705	tags=39%, list=18%, signal=47%
GOBP_NEGATIVE_REGULATION_OF_LYMPHOCYTE_ACTIVATION	GOBP_NEGATIVE_REGULATION_OF_LYMPHOCYTE_ACTIVATION	143	0.560087	1.64931	0.0121951	0.0733037	0.995	3104	tags=48%, list=20%, signal=59%
GOBP_COMPLEMENT_ACTIVATION	GOBP_COMPLEMENT_ACTIVATION	53	0.662931	1.64877	0.00403226	0.0734553	0.995	3254	tags=60%, list=21%, signal=76%
GOBP_NEGATIVE_REGULATION_OF_HEMOPOIESIS	GOBP_NEGATIVE_REGULATION_OF_HEMOPOIESIS	95	0.52121	1.64869	0.00400802	0.0733527	0.995	3806	tags=46%, list=25%, signal=61%
GOBP_REGULATION_OF_ACTIN_FILAMENT_LENGTH	GOBP_REGULATION_OF_ACTIN_FILAMENT_LENGTH	138	0.469339	1.64824	0.00826446	0.0734892	0.995	4267	tags=45%, list=28%, signal=62%
GOBP_TOLL_LIKE_RECEPTOR_4_SIGNALING_PATHWAY	GOBP_TOLL_LIKE_RECEPTOR_4_SIGNALING_PATHWAY	35	0.598055	1.64794	0.00957854	0.0735877	0.995	4120	tags=57%, list=27%, signal=78%
GOBP_CELLULAR_RESPONSE_TO_GROWTH_HORMONE_STIMULUS	GOBP_CELLULAR_RESPONSE_TO_GROWTH_HORMONE_STIMULUS	22	0.576378	1.64727	0.0211946	0.0738196	0.995	4710	tags=64%, list=31%, signal=92%
GOBP_CELL_MIGRATION_INVOLVED_IN_SPROUTING_ANGIOGENESIS	GOBP_CELL_MIGRATION_INVOLVED_IN_SPROUTING_ANGIOGENESIS	51	0.574469	1.64609	0.006	0.0743512	0.995	3288	tags=43%, list=21%, signal=55%
GOBP_LYMPHOCYTE_COSTIMULATION	GOBP_LYMPHOCYTE_COSTIMULATION	44	0.707381	1.64593	0.0083682	0.0742899	0.995	3172	tags=70%, list=21%, signal=89%
GOBP_DEPHOSPHORYLATION	GOBP_DEPHOSPHORYLATION	363	0.352516	1.64586	0	0.0741716	0.995	4675	tags=37%, list=30%, signal=51%
GOBP_RESPONSE_TO_TUMOR_CELL	GOBP_RESPONSE_TO_TUMOR_CELL	35	0.638941	1.64557	0.0156863	0.0742654	0.995	2006	tags=46%, list=13%, signal=52%
GOBP_POSITIVE_REGULATION_OF_LEUKOCYTE_DEGRANULATION	GOBP_POSITIVE_REGULATION_OF_LEUKOCYTE_DEGRANULATION	24	0.610716	1.64553	0.00828157	0.0741368	0.995	4372	tags=58%, list=28%, signal=81%
GOBP_POSITIVE_REGULATION_OF_ENDOTHELIAL_CELL_PROLIFERATION	GOBP_POSITIVE_REGULATION_OF_ENDOTHELIAL_CELL_PROLIFERATION	86	0.576916	1.64551	0.00596422	0.0739993	0.995	3409	tags=45%, list=22%, signal=58%
GOBP_INTERLEUKIN_4_PRODUCTION	GOBP_INTERLEUKIN_4_PRODUCTION	29	0.704658	1.64537	0.00408998	0.0739334	0.995	2018	tags=52%, list=13%, signal=59%
GOBP_REGULATION_OF_VESICLE_MEDIATED_TRANSPORT	GOBP_REGULATION_OF_VESICLE_MEDIATED_TRANSPORT	490	0.437104	1.6442	0	0.0745065	0.995	4396	tags=40%, list=29%, signal=55%
GOBP_POSITIVE_REGULATION_OF_T_CELL_MIGRATION	GOBP_POSITIVE_REGULATION_OF_T_CELL_MIGRATION	28	0.658583	1.64334	0.0202429	0.074948	0.995	2953	tags=50%, list=19%, signal=62%
GOBP_DETECTION_OF_OTHER_ORGANISM	GOBP_DETECTION_OF_OTHER_ORGANISM	17	0.727754	1.64328	0.0141988	0.0748243	0.995	3459	tags=71%, list=23%, signal=91%
GOBP_REGULATION_OF_CHOLESTEROL_EFFLUX	GOBP_REGULATION_OF_CHOLESTEROL_EFFLUX	35	0.62444	1.64244	0.00206612	0.0752079	0.995	4682	tags=63%, list=30%, signal=90%
GOBP_CARDIAC_SEPTUM_MORPHOGENESIS	GOBP_CARDIAC_SEPTUM_MORPHOGENESIS	67	0.583614	1.64196	0.00408998	0.0753528	0.995	3596	tags=52%, list=23%, signal=68%
GOBP_POSITIVE_REGULATION_OF_CELL_MIGRATION_INVOLVED_IN_SPROUTING_ANGIOGENESIS	GOBP_POSITIVE_REGULATION_OF_CELL_MIGRATION_INVOLVED_IN_SPROUTING_ANGIOGENESIS	20	0.672377	1.64195	0.0140845	0.0752085	0.995	3288	tags=60%, list=21%, signal=76%
GOBP_INTERLEUKIN_12_PRODUCTION	GOBP_INTERLEUKIN_12_PRODUCTION	60	0.667803	1.64172	0.00413223	0.0752144	0.995	2939	tags=58%, list=19%, signal=72%
GOBP_AMYLOID_BETA_FORMATION	GOBP_AMYLOID_BETA_FORMATION	40	0.519076	1.64165	0.0102881	0.0751025	0.995	3209	tags=38%, list=21%, signal=47%
GOBP_POSITIVE_REGULATION_OF_LYMPHOCYTE_MEDIATED_IMMUNITY	GOBP_POSITIVE_REGULATION_OF_LYMPHOCYTE_MEDIATED_IMMUNITY	97	0.653049	1.64151	0.0178218	0.0750568	0.995	2849	tags=54%, list=19%, signal=65%
GOBP_INTRACELLULAR_RECEPTOR_SIGNALING_PATHWAY	GOBP_INTRACELLULAR_RECEPTOR_SIGNALING_PATHWAY	235	0.411243	1.64129	0.0019802	0.0750259	0.995	4805	tags=40%, list=31%, signal=58%
GOBP_MAINTENANCE_OF_LOCATION	GOBP_MAINTENANCE_OF_LOCATION	296	0.448314	1.64053	0	0.0753477	0.996	3580	tags=34%, list=23%, signal=43%
GOBP_OUTFLOW_TRACT_SEPTUM_MORPHOGENESIS	GOBP_OUTFLOW_TRACT_SEPTUM_MORPHOGENESIS	26	0.640823	1.64049	0.0121704	0.0752176	0.996	4179	tags=69%, list=27%, signal=95%
GOBP_CD4_POSITIVE_OR_CD8_POSITIVE_ALPHA_BETA_T_CELL_LINEAGE_COMMITMENT	GOBP_CD4_POSITIVE_OR_CD8_POSITIVE_ALPHA_BETA_T_CELL_LINEAGE_COMMITMENT	21	0.751314	1.64041	0.0156863	0.0751137	0.996	2098	tags=57%, list=14%, signal=66%
GOBP_POSITIVE_REGULATION_OF_PROTEIN_LOCALIZATION_TO_CELL_PERIPHERY	GOBP_POSITIVE_REGULATION_OF_PROTEIN_LOCALIZATION_TO_CELL_PERIPHERY	63	0.466542	1.64024	0.00965251	0.0750713	0.996	3126	tags=33%, list=20%, signal=42%
GOBP_POSITIVE_REGULATION_OF_OXIDOREDUCTASE_ACTIVITY	GOBP_POSITIVE_REGULATION_OF_OXIDOREDUCTASE_ACTIVITY	53	0.518755	1.64009	0.0060241	0.075055	0.996	3035	tags=34%, list=20%, signal=42%
GOBP_REGULATION_OF_OSTEOCLAST_DIFFERENTIATION	GOBP_REGULATION_OF_OSTEOCLAST_DIFFERENTIATION	58	0.588588	1.63959	0.0137525	0.0752286	0.996	3423	tags=52%, list=22%, signal=66%
GOBP_LEUKOCYTE_MIGRATION_INVOLVED_IN_INFLAMMATORY_RESPONSE	GOBP_LEUKOCYTE_MIGRATION_INVOLVED_IN_INFLAMMATORY_RESPONSE	19	0.751619	1.63939	0.00196464	0.0752031	0.996	1636	tags=58%, list=11%, signal=65%
GOBP_NEGATIVE_REGULATION_OF_TOLL_LIKE_RECEPTOR_SIGNALING_PATHWAY	GOBP_NEGATIVE_REGULATION_OF_TOLL_LIKE_RECEPTOR_SIGNALING_PATHWAY	31	0.583047	1.63918	0.016	0.0751906	0.996	3737	tags=48%, list=24%, signal=64%
GOBP_STRIATED_MUSCLE_CELL_PROLIFERATION	GOBP_STRIATED_MUSCLE_CELL_PROLIFERATION	56	0.566516	1.63863	0.00407332	0.0754549	0.996	3543	tags=41%, list=23%, signal=53%
GOBP_HEART_VALVE_DEVELOPMENT	GOBP_HEART_VALVE_DEVELOPMENT	62	0.579075	1.63857	0.0178218	0.075364	0.996	3832	tags=53%, list=25%, signal=71%
GOBP_REGULATION_OF_FAT_CELL_DIFFERENTIATION	GOBP_REGULATION_OF_FAT_CELL_DIFFERENTIATION	119	0.472337	1.63775	0.00616016	0.0756338	0.996	4753	tags=50%, list=31%, signal=72%
GOBP_POSITIVE_REGULATION_OF_ACTIVATED_T_CELL_PROLIFERATION	GOBP_POSITIVE_REGULATION_OF_ACTIVATED_T_CELL_PROLIFERATION	24	0.705659	1.63689	0.00996016	0.0761187	0.997	2124	tags=50%, list=14%, signal=58%
GOBP_MUSCLE_CELL_MIGRATION	GOBP_MUSCLE_CELL_MIGRATION	77	0.531231	1.63653	0.0184426	0.0761813	0.997	3430	tags=39%, list=22%, signal=50%
GOBP_POSITIVE_REGULATION_OF_CD4_POSITIVE_ALPHA_BETA_T_CELL_ACTIVATION	GOBP_POSITIVE_REGULATION_OF_CD4_POSITIVE_ALPHA_BETA_T_CELL_ACTIVATION	35	0.699845	1.63594	0.00842105	0.0764186	0.997	3090	tags=66%, list=20%, signal=82%
GOBP_B_CELL_PROLIFERATION	GOBP_B_CELL_PROLIFERATION	93	0.619179	1.63553	0.018595	0.0765268	0.997	2330	tags=39%, list=15%, signal=45%
GOBP_VASCULAR_ENDOTHELIAL_GROWTH_FACTOR_RECEPTOR_SIGNALING_PATHWAY	GOBP_VASCULAR_ENDOTHELIAL_GROWTH_FACTOR_RECEPTOR_SIGNALING_PATHWAY	51	0.541943	1.63499	0.0123967	0.0767233	0.997	3288	tags=41%, list=21%, signal=52%
GOBP_HEART_VALVE_MORPHOGENESIS	GOBP_HEART_VALVE_MORPHOGENESIS	53	0.598272	1.63489	0.0102249	0.0766443	0.997	3832	tags=55%, list=25%, signal=73%
GOBP_T_CELL_LINEAGE_COMMITMENT	GOBP_T_CELL_LINEAGE_COMMITMENT	27	0.699934	1.63472	0.0176471	0.0766146	0.997	2098	tags=48%, list=14%, signal=56%
GOBP_REGULATION_OF_PROTEIN_LOCALIZATION_TO_CELL_PERIPHERY	GOBP_REGULATION_OF_PROTEIN_LOCALIZATION_TO_CELL_PERIPHERY	115	0.417799	1.63399	0.00596422	0.0769902	0.997	3301	tags=30%, list=21%, signal=37%
GOBP_NEGATIVE_REGULATION_OF_T_CELL_PROLIFERATION	GOBP_NEGATIVE_REGULATION_OF_T_CELL_PROLIFERATION	59	0.62001	1.63354	0.0164271	0.0771811	0.997	2918	tags=49%, list=19%, signal=60%
GOBP_POSITIVE_REGULATION_OF_FILOPODIUM_ASSEMBLY	GOBP_POSITIVE_REGULATION_OF_FILOPODIUM_ASSEMBLY	24	0.590148	1.63322	0.0214008	0.0772434	0.997	3317	tags=38%, list=22%, signal=48%
GOBP_REGULATION_OF_T_HELPER_CELL_DIFFERENTIATION	GOBP_REGULATION_OF_T_HELPER_CELL_DIFFERENTIATION	36	0.661906	1.63276	0.0183299	0.0774235	0.997	3795	tags=64%, list=25%, signal=85%
GOBP_INFLAMMATORY_RESPONSE_TO_WOUNDING	GOBP_INFLAMMATORY_RESPONSE_TO_WOUNDING	15	0.73514	1.63245	0.0238095	0.0774356	0.997	3361	tags=67%, list=22%, signal=85%
GOBP_NEGATIVE_REGULATION_OF_LEUKOCYTE_MIGRATION	GOBP_NEGATIVE_REGULATION_OF_LEUKOCYTE_MIGRATION	37	0.669854	1.63229	0.00992064	0.0773783	0.997	2927	tags=59%, list=19%, signal=73%
GOBP_SEGMENT_SPECIFICATION	GOBP_SEGMENT_SPECIFICATION	15	0.725304	1.63218	0.00954198	0.0773225	0.997	2629	tags=47%, list=17%, signal=56%
GOBP_CELLULAR_RESPONSE_TO_HEAT	GOBP_CELLULAR_RESPONSE_TO_HEAT	58	0.426884	1.6321	0.0141129	0.0772383	0.997	1556	tags=12%, list=10%, signal=13%
GOBP_POSITIVE_REGULATION_OF_CHOLESTEROL_EFFLUX	GOBP_POSITIVE_REGULATION_OF_CHOLESTEROL_EFFLUX	25	0.641349	1.63192	0.006	0.0772331	0.997	4501	tags=64%, list=29%, signal=90%
GOBP_VENTRICULAR_SEPTUM_MORPHOGENESIS	GOBP_VENTRICULAR_SEPTUM_MORPHOGENESIS	39	0.627393	1.63188	0.00614754	0.0771101	0.997	3832	tags=56%, list=25%, signal=75%
GOBP_DEFENSE_RESPONSE_TO_GRAM_POSITIVE_BACTERIUM	GOBP_DEFENSE_RESPONSE_TO_GRAM_POSITIVE_BACTERIUM	75	0.593723	1.63155	0.00200401	0.0771968	0.997	2849	tags=47%, list=19%, signal=57%
GOBP_MUSCLE_CONTRACTION	GOBP_MUSCLE_CONTRACTION	318	0.527071	1.63132	0	0.0772147	0.997	2548	tags=33%, list=17%, signal=39%
GOBP_REGULATION_OF_COMPLEMENT_ACTIVATION	GOBP_REGULATION_OF_COMPLEMENT_ACTIVATION	20	0.699701	1.63064	0.00583658	0.0775364	0.997	3160	tags=70%, list=21%, signal=88%
GOBP_REGULATION_OF_T_CELL_MEDIATED_CYTOTOXICITY	GOBP_REGULATION_OF_T_CELL_MEDIATED_CYTOTOXICITY	34	0.729391	1.63048	0.00787402	0.0774943	0.997	1916	tags=56%, list=12%, signal=64%
GOBP_NEGATIVE_REGULATION_OF_CYTOKINE_PRODUCTION_INVOLVED_IN_IMMUNE_RESPONSE	GOBP_NEGATIVE_REGULATION_OF_CYTOKINE_PRODUCTION_INVOLVED_IN_IMMUNE_RESPONSE	27	0.709157	1.63035	0.00614754	0.077432	0.997	2795	tags=67%, list=18%, signal=81%
GOBP_REGULATION_OF_PROTEIN_CONTAINING_COMPLEX_ASSEMBLY	GOBP_REGULATION_OF_PROTEIN_CONTAINING_COMPLEX_ASSEMBLY	354	0.387437	1.63032	0.00204082	0.0773153	0.997	3908	tags=33%, list=25%, signal=43%
GOBP_POSITIVE_REGULATION_OF_APOPTOTIC_SIGNALING_PATHWAY	GOBP_POSITIVE_REGULATION_OF_APOPTOTIC_SIGNALING_PATHWAY	116	0.421665	1.62997	0.016129	0.0774083	0.997	2088	tags=18%, list=14%, signal=21%
GOBP_CARBOHYDRATE_DERIVATIVE_CATABOLIC_PROCESS	GOBP_CARBOHYDRATE_DERIVATIVE_CATABOLIC_PROCESS	150	0.427617	1.62996	0.00790514	0.0772841	0.997	4747	tags=46%, list=31%, signal=66%
GOBP_POSITIVE_REGULATION_OF_JUN_KINASE_ACTIVITY	GOBP_POSITIVE_REGULATION_OF_JUN_KINASE_ACTIVITY	42	0.531909	1.62959	0.0181087	0.0773746	0.997	3377	tags=43%, list=22%, signal=55%
GOBP_REGULATION_OF_CELL_SUBSTRATE_ADHESION	GOBP_REGULATION_OF_CELL_SUBSTRATE_ADHESION	202	0.472801	1.62948	0.00403226	0.0773232	0.997	4010	tags=42%, list=26%, signal=56%
GOBP_ACTOMYOSIN_STRUCTURE_ORGANIZATION	GOBP_ACTOMYOSIN_STRUCTURE_ORGANIZATION	187	0.464899	1.62892	0.00601202	0.0775842	0.997	3599	tags=37%, list=23%, signal=48%
GOBP_POSITIVE_REGULATION_OF_ACTIN_FILAMENT_POLYMERIZATION	GOBP_POSITIVE_REGULATION_OF_ACTIN_FILAMENT_POLYMERIZATION	47	0.54042	1.62886	0.0163934	0.0774939	0.997	2739	tags=36%, list=18%, signal=44%
GOBP_CELL_ADHESION_MEDIATED_BY_INTEGRIN	GOBP_CELL_ADHESION_MEDIATED_BY_INTEGRIN	80	0.560462	1.62874	0.00823045	0.0774247	0.997	3822	tags=54%, list=25%, signal=71%
GOBP_NEGATIVE_REGULATION_OF_CELL_KILLING	GOBP_NEGATIVE_REGULATION_OF_CELL_KILLING	23	0.70554	1.62863	0.0147679	0.0773465	0.997	3459	tags=65%, list=23%, signal=84%
GOBP_POSITIVE_REGULATION_OF_PROTEIN_LOCALIZATION_TO_MEMBRANE	GOBP_POSITIVE_REGULATION_OF_PROTEIN_LOCALIZATION_TO_MEMBRANE	87	0.425783	1.62857	0.00194553	0.0772482	0.997	3126	tags=30%, list=20%, signal=37%
GOBP_POSITIVE_REGULATION_OF_INTERLEUKIN_12_PRODUCTION	GOBP_POSITIVE_REGULATION_OF_INTERLEUKIN_12_PRODUCTION	40	0.671289	1.62851	0.00402414	0.0771501	0.997	2605	tags=52%, list=17%, signal=63%
GOBP_REGULATION_OF_CD4_POSITIVE_ALPHA_BETA_T_CELL_DIFFERENTIATION	GOBP_REGULATION_OF_CD4_POSITIVE_ALPHA_BETA_T_CELL_DIFFERENTIATION	46	0.669245	1.62846	0.0185567	0.0770371	0.997	3795	tags=65%, list=25%, signal=86%
GOBP_POSITIVE_REGULATION_OF_VASCULAR_ENDOTHELIAL_GROWTH_FACTOR_PRODUCTION	GOBP_POSITIVE_REGULATION_OF_VASCULAR_ENDOTHELIAL_GROWTH_FACTOR_PRODUCTION	28	0.672021	1.62844	0.00604839	0.0769188	0.997	2663	tags=54%, list=17%, signal=65%
GOBP_PLATELET_DERIVED_GROWTH_FACTOR_RECEPTOR_SIGNALING_PATHWAY	GOBP_PLATELET_DERIVED_GROWTH_FACTOR_RECEPTOR_SIGNALING_PATHWAY	52	0.489851	1.62831	0.0205761	0.0768587	0.997	4545	tags=50%, list=30%, signal=71%
GOBP_POSITIVE_REGULATION_OF_T_CELL_CYTOKINE_PRODUCTION	GOBP_POSITIVE_REGULATION_OF_T_CELL_CYTOKINE_PRODUCTION	25	0.682334	1.6281	0.016632	0.076914	0.997	2642	tags=52%, list=17%, signal=63%
GOBP_REGULATION_OF_PEPTIDYL_SERINE_PHOSPHORYLATION	GOBP_REGULATION_OF_PEPTIDYL_SERINE_PHOSPHORYLATION	128	0.459646	1.62745	0.00201207	0.0771474	0.997	4243	tags=39%, list=28%, signal=54%
GOBP_LYMPHOCYTE_APOPTOTIC_PROCESS	GOBP_LYMPHOCYTE_APOPTOTIC_PROCESS	71	0.532667	1.62732	0.0222222	0.0770899	0.997	3583	tags=42%, list=23%, signal=55%
GOBP_MYELOID_CELL_APOPTOTIC_PROCESS	GOBP_MYELOID_CELL_APOPTOTIC_PROCESS	29	0.556667	1.6273	0.00980392	0.0769617	0.997	2373	tags=38%, list=15%, signal=45%
GOBP_GRANULOCYTE_CHEMOTAXIS	GOBP_GRANULOCYTE_CHEMOTAXIS	107	0.622872	1.62727	0.00403226	0.0768554	0.997	2998	tags=53%, list=20%, signal=66%
GOBP_INTERLEUKIN_13_PRODUCTION	GOBP_INTERLEUKIN_13_PRODUCTION	18	0.632385	1.62711	0.00635593	0.0768241	0.997	3715	tags=56%, list=24%, signal=73%
GOBP_ENDOCARDIAL_CUSHION_MORPHOGENESIS	GOBP_ENDOCARDIAL_CUSHION_MORPHOGENESIS	40	0.640261	1.62693	0.00840336	0.0768141	0.997	4533	tags=68%, list=30%, signal=96%
GOBP_PRODUCTION_OF_MOLECULAR_MEDIATOR_INVOLVED_IN_INFLAMMATORY_RESPONSE	GOBP_PRODUCTION_OF_MOLECULAR_MEDIATOR_INVOLVED_IN_INFLAMMATORY_RESPONSE	78	0.560358	1.62687	0.0180723	0.0767123	0.997	3098	tags=45%, list=20%, signal=56%
GOBP_POSITIVE_REGULATION_OF_CELL_SUBSTRATE_ADHESION	GOBP_POSITIVE_REGULATION_OF_CELL_SUBSTRATE_ADHESION	117	0.517334	1.62663	0.00811359	0.0767768	0.997	3587	tags=44%, list=23%, signal=58%
GOBP_B_CELL_DIFFERENTIATION	GOBP_B_CELL_DIFFERENTIATION	135	0.523229	1.62625	0.0316832	0.0768681	0.997	2113	tags=31%, list=14%, signal=36%
GOBP_POSITIVE_REGULATION_OF_SIGNALING_RECEPTOR_ACTIVITY	GOBP_POSITIVE_REGULATION_OF_SIGNALING_RECEPTOR_ACTIVITY	41	0.588296	1.62607	0.00595238	0.0768339	0.997	3288	tags=44%, list=21%, signal=56%
GOBP_CD4_POSITIVE_ALPHA_BETA_T_CELL_CYTOKINE_PRODUCTION	GOBP_CD4_POSITIVE_ALPHA_BETA_T_CELL_CYTOKINE_PRODUCTION	19	0.749872	1.62602	0.00211416	0.0767324	0.997	2642	tags=63%, list=17%, signal=76%
GOBP_NEGATIVE_REGULATION_OF_CYSTEINE_TYPE_ENDOPEPTIDASE_ACTIVITY	GOBP_NEGATIVE_REGULATION_OF_CYSTEINE_TYPE_ENDOPEPTIDASE_ACTIVITY	76	0.485735	1.62579	0.00986193	0.0767358	0.997	3203	tags=37%, list=21%, signal=46%
GOBP_INTERFERON_BETA_PRODUCTION	GOBP_INTERFERON_BETA_PRODUCTION	53	0.515781	1.62509	0.0308008	0.0769873	0.998	2527	tags=30%, list=16%, signal=36%
GOBP_REGULATION_OF_REACTIVE_OXYGEN_SPECIES_METABOLIC_PROCESS	GOBP_REGULATION_OF_REACTIVE_OXYGEN_SPECIES_METABOLIC_PROCESS	127	0.448779	1.62497	0.006	0.0769303	0.998	3295	tags=35%, list=21%, signal=45%
GOBP_REGULATION_OF_LIPOPOLYSACCHARIDE_MEDIATED_SIGNALING_PATHWAY	GOBP_REGULATION_OF_LIPOPOLYSACCHARIDE_MEDIATED_SIGNALING_PATHWAY	23	0.644688	1.62487	0.00414079	0.0768854	0.998	3487	tags=52%, list=23%, signal=67%
GOBP_REGULATION_OF_GRANULOCYTE_CHEMOTAXIS	GOBP_REGULATION_OF_GRANULOCYTE_CHEMOTAXIS	46	0.609101	1.62483	0.0166667	0.0767613	0.998	3290	tags=54%, list=21%, signal=69%
GOBP_REGULATION_OF_ANTIGEN_RECEPTOR_MEDIATED_SIGNALING_PATHWAY	GOBP_REGULATION_OF_ANTIGEN_RECEPTOR_MEDIATED_SIGNALING_PATHWAY	58	0.679002	1.62482	0.029703	0.0766417	0.998	3104	tags=53%, list=20%, signal=67%
GOBP_WOUND_HEALING	GOBP_WOUND_HEALING	396	0.473019	1.6246	0.002079	0.0766587	0.998	3449	tags=37%, list=22%, signal=46%
GOBP_ENDOCARDIAL_CUSHION_FORMATION	GOBP_ENDOCARDIAL_CUSHION_FORMATION	31	0.657231	1.6244	0.0146751	0.0766939	0.998	4533	tags=74%, list=30%, signal=105%
GOBP_REGULATION_OF_JNK_CASCADE	GOBP_REGULATION_OF_JNK_CASCADE	136	0.467718	1.62402	0	0.0767689	0.998	3413	tags=35%, list=22%, signal=45%
GOBP_REGULATION_OF_SYNAPTIC_VESICLE_RECYCLING	GOBP_REGULATION_OF_SYNAPTIC_VESICLE_RECYCLING	18	0.655802	1.62387	0.016129	0.0767261	0.998	1266	tags=22%, list=8%, signal=24%
GOBP_POSITIVE_REGULATION_OF_PEPTIDYL_SERINE_PHOSPHORYLATION	GOBP_POSITIVE_REGULATION_OF_PEPTIDYL_SERINE_PHOSPHORYLATION	98	0.479156	1.62384	0.00197239	0.0766213	0.998	2707	tags=30%, list=18%, signal=36%
GOBP_NEGATIVE_REGULATION_OF_RELEASE_OF_CYTOCHROME_C_FROM_MITOCHONDRIA	GOBP_NEGATIVE_REGULATION_OF_RELEASE_OF_CYTOCHROME_C_FROM_MITOCHONDRIA	18	0.505825	1.623	0.0294737	0.0770108	0.999	3031	tags=28%, list=20%, signal=35%
GOBP_RECEPTOR_SIGNALING_PATHWAY_VIA_STAT	GOBP_RECEPTOR_SIGNALING_PATHWAY_VIA_STAT	158	0.489007	1.62297	0.00197628	0.0769033	0.999	3251	tags=35%, list=21%, signal=44%
GOBP_GRANULOCYTE_MIGRATION	GOBP_GRANULOCYTE_MIGRATION	134	0.59261	1.62277	0.00397614	0.0769142	0.999	3581	tags=55%, list=23%, signal=71%
GOBP_RESPONSE_TO_SALT_STRESS	GOBP_RESPONSE_TO_SALT_STRESS	26	0.566736	1.62226	0.0238612	0.0770999	0.999	1380	tags=23%, list=9%, signal=25%
GOBP_NEGATIVE_REGULATION_OF_PEPTIDYL_LYSINE_ACETYLATION	GOBP_NEGATIVE_REGULATION_OF_PEPTIDYL_LYSINE_ACETYLATION	19	0.551926	1.62197	0.0164948	0.0771579	0.999	2702	tags=26%, list=18%, signal=32%
GOBP_POSITIVE_REGULATION_OF_PRODUCTION_OF_MOLECULAR_MEDIATOR_OF_IMMUNE_RESPONSE	GOBP_POSITIVE_REGULATION_OF_PRODUCTION_OF_MOLECULAR_MEDIATOR_OF_IMMUNE_RESPONSE	108	0.540192	1.62188	0.0264766	0.0770821	0.999	3875	tags=48%, list=25%, signal=64%
GOBP_VASCULAR_WOUND_HEALING	GOBP_VASCULAR_WOUND_HEALING	17	0.660394	1.62137	0.0147992	0.0772838	0.999	2991	tags=47%, list=19%, signal=58%
GOBP_NEGATIVE_REGULATION_OF_LEUKOCYTE_PROLIFERATION	GOBP_NEGATIVE_REGULATION_OF_LEUKOCYTE_PROLIFERATION	81	0.606334	1.62124	0.0120482	0.0772288	0.999	3358	tags=57%, list=22%, signal=72%
GOBP_MYELOID_DENDRITIC_CELL_ACTIVATION	GOBP_MYELOID_DENDRITIC_CELL_ACTIVATION	26	0.720333	1.6203	0.00422833	0.0777126	0.999	2458	tags=58%, list=16%, signal=69%
GOBP_DEFINITIVE_HEMOPOIESIS	GOBP_DEFINITIVE_HEMOPOIESIS	19	0.645157	1.62018	0.0330578	0.0776525	0.999	2871	tags=42%, list=19%, signal=52%
GOBP_VENTRICULAR_SEPTUM_DEVELOPMENT	GOBP_VENTRICULAR_SEPTUM_DEVELOPMENT	69	0.54365	1.62012	0.0161943	0.0775645	0.999	3596	tags=45%, list=23%, signal=58%
GOBP_T_HELPER_17_TYPE_IMMUNE_RESPONSE	GOBP_T_HELPER_17_TYPE_IMMUNE_RESPONSE	38	0.639931	1.61995	0.0242915	0.0775547	0.999	2705	tags=50%, list=18%, signal=61%
GOBP_RELAXATION_OF_MUSCLE	GOBP_RELAXATION_OF_MUSCLE	30	0.649664	1.61984	0.00410678	0.0775155	0.999	3093	tags=53%, list=20%, signal=67%
GOBP_PURINERGIC_NUCLEOTIDE_RECEPTOR_SIGNALING_PATHWAY	GOBP_PURINERGIC_NUCLEOTIDE_RECEPTOR_SIGNALING_PATHWAY	30	0.700679	1.6198	0.00614754	0.0774068	0.999	3049	tags=63%, list=20%, signal=79%
GOBP_TRANSPORT_OF_VIRUS	GOBP_TRANSPORT_OF_VIRUS	18	0.555895	1.6197	0.0327198	0.0773213	0.999	3134	tags=44%, list=20%, signal=56%
GOBP_NEGATIVE_REGULATION_OF_CELL_SUBSTRATE_JUNCTION_ORGANIZATION	GOBP_NEGATIVE_REGULATION_OF_CELL_SUBSTRATE_JUNCTION_ORGANIZATION	16	0.639958	1.61956	0.0120968	0.077261	0.999	1973	tags=38%, list=13%, signal=43%
GOBP_POSITIVE_REGULATION_OF_ALPHA_BETA_T_CELL_PROLIFERATION	GOBP_POSITIVE_REGULATION_OF_ALPHA_BETA_T_CELL_PROLIFERATION	21	0.75791	1.61932	0.011976	0.0773235	0.999	2207	tags=67%, list=14%, signal=78%
GOBP_REGULATION_OF_EXTRACELLULAR_MATRIX_ORGANIZATION	GOBP_REGULATION_OF_EXTRACELLULAR_MATRIX_ORGANIZATION	41	0.593619	1.619	0.016632	0.07742	0.999	4695	tags=59%, list=31%, signal=84%
GOBP_ANTIGEN_PROCESSING_AND_PRESENTATION_OF_PEPTIDE_OR_POLYSACCHARIDE_ANTIGEN_VIA_MHC_CLASS_II	GOBP_ANTIGEN_PROCESSING_AND_PRESENTATION_OF_PEPTIDE_OR_POLYSACCHARIDE_ANTIGEN_VIA_MHC_CLASS_II	27	0.706493	1.61891	0.0143443	0.0773449	0.999	3294	tags=70%, list=21%, signal=89%
GOBP_SMOOTH_MUSCLE_CELL_MIGRATION	GOBP_SMOOTH_MUSCLE_CELL_MIGRATION	64	0.536837	1.6189	0.0204918	0.0772246	0.999	3430	tags=41%, list=22%, signal=52%
GOBP_REGULATION_OF_T_CELL_APOPTOTIC_PROCESS	GOBP_REGULATION_OF_T_CELL_APOPTOTIC_PROCESS	31	0.601996	1.61847	0.00826446	0.0773989	0.999	3519	tags=52%, list=23%, signal=67%
GOBP_MYELOID_CELL_DEVELOPMENT	GOBP_MYELOID_CELL_DEVELOPMENT	68	0.482477	1.61805	0.0217822	0.0775819	0.999	4171	tags=46%, list=27%, signal=62%
GOBP_MEMBRANE_DEPOLARIZATION_DURING_CARDIAC_MUSCLE_CELL_ACTION_POTENTIAL	GOBP_MEMBRANE_DEPOLARIZATION_DURING_CARDIAC_MUSCLE_CELL_ACTION_POTENTIAL	21	0.733215	1.61791	0.00408998	0.0775469	0.999	2387	tags=52%, list=16%, signal=62%
GOBP_NEGATIVE_REGULATION_OF_ION_TRANSMEMBRANE_TRANSPORT	GOBP_NEGATIVE_REGULATION_OF_ION_TRANSMEMBRANE_TRANSPORT	79	0.529393	1.6179	0.00621118	0.0774239	0.999	3627	tags=41%, list=24%, signal=53%
GOBP_MUSCLE_SYSTEM_PROCESS	GOBP_MUSCLE_SYSTEM_PROCESS	395	0.50994	1.61692	0	0.0778971	0.999	2548	tags=31%, list=17%, signal=37%
GOBP_CARDIAC_MUSCLE_CELL_PROLIFERATION	GOBP_CARDIAC_MUSCLE_CELL_PROLIFERATION	43	0.583169	1.61619	0.0103734	0.0782551	0.999	4345	tags=53%, list=28%, signal=74%
GOBP_RESPONSE_TO_INTERLEUKIN_6	GOBP_RESPONSE_TO_INTERLEUKIN_6	35	0.614253	1.61615	0.00784314	0.0781576	0.999	2098	tags=43%, list=14%, signal=50%
GOBP_POSITIVE_REGULATION_OF_VASCULAR_ASSOCIATED_SMOOTH_MUSCLE_CELL_PROLIFERATION	GOBP_POSITIVE_REGULATION_OF_VASCULAR_ASSOCIATED_SMOOTH_MUSCLE_CELL_PROLIFERATION	31	0.618909	1.61604	0.0122699	0.0780829	0.999	3186	tags=52%, list=21%, signal=65%
GOBP_SUPEROXIDE_METABOLIC_PROCESS	GOBP_SUPEROXIDE_METABOLIC_PROCESS	62	0.550888	1.61557	0.00819672	0.078237	0.999	2756	tags=40%, list=18%, signal=49%
GOBP_POSITIVE_REGULATION_OF_ERYTHROCYTE_DIFFERENTIATION	GOBP_POSITIVE_REGULATION_OF_ERYTHROCYTE_DIFFERENTIATION	28	0.467668	1.61502	0.0205761	0.0784314	0.999	3543	tags=25%, list=23%, signal=32%
GOBP_POSITIVE_REGULATION_OF_CALCIUM_ION_TRANSPORT	GOBP_POSITIVE_REGULATION_OF_CALCIUM_ION_TRANSPORT	105	0.535363	1.61469	0	0.0785176	0.999	3397	tags=46%, list=22%, signal=58%
GOBP_VASCULAR_ASSOCIATED_SMOOTH_MUSCLE_CELL_PROLIFERATION	GOBP_VASCULAR_ASSOCIATED_SMOOTH_MUSCLE_CELL_PROLIFERATION	52	0.58196	1.61467	0.00616016	0.0784055	0.999	3236	tags=44%, list=21%, signal=56%
GOBP_AMINOGLYCAN_METABOLIC_PROCESS	GOBP_AMINOGLYCAN_METABOLIC_PROCESS	125	0.503967	1.61457	0.00211416	0.0783596	0.999	3432	tags=39%, list=22%, signal=50%
GOBP_POSITIVE_REGULATION_OF_INTERFERON_BETA_PRODUCTION	GOBP_POSITIVE_REGULATION_OF_INTERFERON_BETA_PRODUCTION	37	0.539596	1.61445	0.0382294	0.0783222	0.999	2527	tags=30%, list=16%, signal=35%
GOBP_POSITIVE_REGULATION_OF_CD4_POSITIVE_ALPHA_BETA_T_CELL_DIFFERENTIATION	GOBP_POSITIVE_REGULATION_OF_CD4_POSITIVE_ALPHA_BETA_T_CELL_DIFFERENTIATION	29	0.699842	1.61436	0.0143443	0.078249	0.999	3795	tags=76%, list=25%, signal=101%
GOBP_SIALYLATION	GOBP_SIALYLATION	19	0.672266	1.61385	0.00401606	0.0784355	0.999	3263	tags=53%, list=21%, signal=67%
GOBP_PHOSPHATIDYLINOSITOL_PHOSPHATE_BIOSYNTHETIC_PROCESS	GOBP_PHOSPHATIDYLINOSITOL_PHOSPHATE_BIOSYNTHETIC_PROCESS	60	0.414535	1.61336	0.0255403	0.0786126	0.999	4583	tags=40%, list=30%, signal=57%
GOBP_FOAM_CELL_DIFFERENTIATION	GOBP_FOAM_CELL_DIFFERENTIATION	37	0.652805	1.61295	0.00811359	0.0787835	0.999	4493	tags=73%, list=29%, signal=103%
GOBP_PODOSOME_ASSEMBLY	GOBP_PODOSOME_ASSEMBLY	20	0.626748	1.61295	0.022541	0.0786611	0.999	3880	tags=55%, list=25%, signal=73%
GOBP_REGULATION_OF_B_CELL_ACTIVATION	GOBP_REGULATION_OF_B_CELL_ACTIVATION	115	0.569756	1.6126	0.0383065	0.07874	0.999	3384	tags=50%, list=22%, signal=64%
GOBP_PEPTIDYL_TYROSINE_AUTOPHOSPHORYLATION	GOBP_PEPTIDYL_TYROSINE_AUTOPHOSPHORYLATION	21	0.604613	1.61251	0.0161943	0.0786993	0.999	2991	tags=48%, list=19%, signal=59%
GOBP_NEGATIVE_REGULATION_OF_MACROAUTOPHAGY	GOBP_NEGATIVE_REGULATION_OF_MACROAUTOPHAGY	33	0.400848	1.61224	0.0384615	0.0787854	0.999	2293	tags=15%, list=15%, signal=18%
GOBP_SEROTONIN_TRANSPORT	GOBP_SEROTONIN_TRANSPORT	19	0.730143	1.61125	0.00394477	0.0792544	0.999	2018	tags=58%, list=13%, signal=67%
GOBP_REGULATION_OF_CATION_TRANSMEMBRANE_TRANSPORT	GOBP_REGULATION_OF_CATION_TRANSMEMBRANE_TRANSPORT	303	0.485991	1.61099	0	0.0793074	0.999	3093	tags=36%, list=20%, signal=45%
GOBP_NEGATIVE_REGULATION_OF_TRANSFORMING_GROWTH_FACTOR_BETA_RECEPTOR_SIGNALING_PATHWAY	GOBP_NEGATIVE_REGULATION_OF_TRANSFORMING_GROWTH_FACTOR_BETA_RECEPTOR_SIGNALING_PATHWAY	70	0.50004	1.61078	0.00421053	0.0793194	0.999	3385	tags=33%, list=22%, signal=42%
GOBP_CELLULAR_RESPONSE_TO_VASCULAR_ENDOTHELIAL_GROWTH_FACTOR_STIMULUS	GOBP_CELLULAR_RESPONSE_TO_VASCULAR_ENDOTHELIAL_GROWTH_FACTOR_STIMULUS	58	0.549764	1.61051	0.0181818	0.0793669	0.999	3854	tags=45%, list=25%, signal=60%
GOBP_REGULATION_OF_MYOBLAST_FUSION	GOBP_REGULATION_OF_MYOBLAST_FUSION	19	0.631448	1.61031	0.0143149	0.0794119	0.999	3195	tags=63%, list=21%, signal=80%
GOBP_REGULATION_OF_MUSCLE_ADAPTATION	GOBP_REGULATION_OF_MUSCLE_ADAPTATION	73	0.476703	1.60971	0.0119048	0.0796846	0.999	3627	tags=33%, list=24%, signal=43%
GOBP_POSITIVE_REGULATION_OF_RESPONSE_TO_BIOTIC_STIMULUS	GOBP_POSITIVE_REGULATION_OF_RESPONSE_TO_BIOTIC_STIMULUS	156	0.536767	1.60971	0.0242915	0.0795706	0.999	3845	tags=46%, list=25%, signal=60%
GOBP_MESENCHYME_MORPHOGENESIS	GOBP_MESENCHYME_MORPHOGENESIS	55	0.625773	1.60879	0.0168776	0.0800712	0.999	4826	tags=69%, list=31%, signal=100%
GOBP_CARDIAC_SEPTUM_DEVELOPMENT	GOBP_CARDIAC_SEPTUM_DEVELOPMENT	101	0.51248	1.60872	0.00821355	0.0799889	0.999	3440	tags=42%, list=22%, signal=53%
GOBP_RESPONSE_TO_MECHANICAL_STIMULUS	GOBP_RESPONSE_TO_MECHANICAL_STIMULUS	187	0.474251	1.60869	0	0.0799071	0.999	2843	tags=36%, list=19%, signal=44%
GOBP_GLIAL_CELL_MIGRATION	GOBP_GLIAL_CELL_MIGRATION	45	0.558935	1.60853	0.0136452	0.0798749	0.999	2096	tags=33%, list=14%, signal=38%
GOBP_CIRCADIAN_SLEEP_WAKE_CYCLE_SLEEP	GOBP_CIRCADIAN_SLEEP_WAKE_CYCLE_SLEEP	16	0.685569	1.60817	0.0102459	0.0799805	0.999	1462	tags=38%, list=10%, signal=41%
GOBP_EXTRINSIC_APOPTOTIC_SIGNALING_PATHWAY	GOBP_EXTRINSIC_APOPTOTIC_SIGNALING_PATHWAY	206	0.427867	1.60817	0.00204082	0.0798639	0.999	3288	tags=28%, list=21%, signal=35%
GOBP_REGULATION_OF_MIRNA_TRANSCRIPTION	GOBP_REGULATION_OF_MIRNA_TRANSCRIPTION	55	0.552393	1.60811	0.014	0.0797585	0.999	2955	tags=36%, list=19%, signal=45%
GOBP_NEGATIVE_REGULATION_OF_SMOOTH_MUSCLE_CELL_PROLIFERATION	GOBP_NEGATIVE_REGULATION_OF_SMOOTH_MUSCLE_CELL_PROLIFERATION	50	0.616186	1.60804	0.0119522	0.0796848	0.999	4729	tags=68%, list=31%, signal=98%
GOBP_NEGATIVE_REGULATION_OF_ANTIGEN_RECEPTOR_MEDIATED_SIGNALING_PATHWAY	GOBP_NEGATIVE_REGULATION_OF_ANTIGEN_RECEPTOR_MEDIATED_SIGNALING_PATHWAY	32	0.698189	1.60783	0.0217822	0.0796675	0.999	2083	tags=50%, list=14%, signal=58%
GOBP_GAMMA_DELTA_T_CELL_ACTIVATION	GOBP_GAMMA_DELTA_T_CELL_ACTIVATION	17	0.711566	1.60781	0.0265306	0.0795632	0.999	2492	tags=65%, list=16%, signal=77%
GOBP_TYPE_2_IMMUNE_RESPONSE	GOBP_TYPE_2_IMMUNE_RESPONSE	36	0.628699	1.60777	0.0146751	0.0794722	0.999	2247	tags=44%, list=15%, signal=52%
GOBP_REGULATION_OF_CELLULAR_EXTRAVASATION	GOBP_REGULATION_OF_CELLULAR_EXTRAVASATION	38	0.632564	1.60741	0.00829876	0.0795818	0.999	3313	tags=58%, list=22%, signal=74%
GOBP_REGULATION_OF_ATP_METABOLIC_PROCESS	GOBP_REGULATION_OF_ATP_METABOLIC_PROCESS	75	0.435343	1.60699	0.0271318	0.0797389	0.999	2766	tags=24%, list=18%, signal=29%
GOBP_CD40_SIGNALING_PATHWAY	GOBP_CD40_SIGNALING_PATHWAY	16	0.660222	1.60668	0.0273684	0.0798271	0.999	1507	tags=38%, list=10%, signal=42%
GOBP_POSITIVE_REGULATION_OF_MIRNA_TRANSCRIPTION	GOBP_POSITIVE_REGULATION_OF_MIRNA_TRANSCRIPTION	42	0.581269	1.60666	0.00793651	0.079725	0.999	2955	tags=40%, list=19%, signal=50%
GOBP_PROTEIN_DEPHOSPHORYLATION	GOBP_PROTEIN_DEPHOSPHORYLATION	261	0.353345	1.60561	0.00201207	0.0803348	0.999	4650	tags=36%, list=30%, signal=51%
GOBP_AMEBOIDAL_TYPE_CELL_MIGRATION	GOBP_AMEBOIDAL_TYPE_CELL_MIGRATION	394	0.441542	1.60555	0.0040404	0.0802597	0.999	3409	tags=36%, list=22%, signal=44%
GOBP_NEGATIVE_REGULATION_OF_INFLAMMATORY_RESPONSE_TO_ANTIGENIC_STIMULUS	GOBP_NEGATIVE_REGULATION_OF_INFLAMMATORY_RESPONSE_TO_ANTIGENIC_STIMULUS	24	0.648132	1.60552	0.0120968	0.0801526	0.999	2035	tags=38%, list=13%, signal=43%
GOBP_REGULATION_OF_MYELOID_CELL_DIFFERENTIATION	GOBP_REGULATION_OF_MYELOID_CELL_DIFFERENTIATION	173	0.443355	1.60527	0.00795229	0.0802407	0.999	3806	tags=38%, list=25%, signal=50%
GOBP_REGULATION_OF_ACTOMYOSIN_STRUCTURE_ORGANIZATION	GOBP_REGULATION_OF_ACTOMYOSIN_STRUCTURE_ORGANIZATION	92	0.449916	1.60511	0.0209205	0.0802085	0.999	3599	tags=34%, list=23%, signal=44%
GOBP_CARDIOBLAST_DIFFERENTIATION	GOBP_CARDIOBLAST_DIFFERENTIATION	17	0.663375	1.6047	0.0139165	0.0803836	0.999	2096	tags=41%, list=14%, signal=48%
GOBP_REGULATION_OF_STRESS_ACTIVATED_PROTEIN_KINASE_SIGNALING_CASCADE	GOBP_REGULATION_OF_STRESS_ACTIVATED_PROTEIN_KINASE_SIGNALING_CASCADE	188	0.447207	1.60452	0.00387597	0.080395	0.999	3437	tags=35%, list=22%, signal=44%
GOBP_POSITIVE_REGULATION_OF_MYELOID_LEUKOCYTE_MEDIATED_IMMUNITY	GOBP_POSITIVE_REGULATION_OF_MYELOID_LEUKOCYTE_MEDIATED_IMMUNITY	20	0.681606	1.60394	0.0201613	0.0806355	0.999	1416	tags=40%, list=9%, signal=44%
GOBP_NEGATIVE_REGULATION_OF_TRANSFERASE_ACTIVITY	GOBP_NEGATIVE_REGULATION_OF_TRANSFERASE_ACTIVITY	236	0.38202	1.60328	0.00390625	0.0809159	0.999	4669	tags=42%, list=30%, signal=59%
GOBP_REGULATION_OF_PROTEIN_BINDING	GOBP_REGULATION_OF_PROTEIN_BINDING	184	0.400359	1.6031	0.00194175	0.0808986	0.999	3665	tags=29%, list=24%, signal=38%
GOBP_NEGATIVE_REGULATION_OF_TRANSPORTER_ACTIVITY	GOBP_NEGATIVE_REGULATION_OF_TRANSPORTER_ACTIVITY	68	0.545542	1.60303	0.0105485	0.0808126	0.999	1711	tags=26%, list=11%, signal=30%
GOBP_HORMONE_MEDIATED_SIGNALING_PATHWAY	GOBP_HORMONE_MEDIATED_SIGNALING_PATHWAY	172	0.422672	1.60291	0	0.0807868	0.999	5057	tags=41%, list=33%, signal=60%
GOBP_IMMUNOGLOBULIN_PRODUCTION	GOBP_IMMUNOGLOBULIN_PRODUCTION	108	0.552324	1.60281	0.0290456	0.0807362	0.999	2098	tags=32%, list=14%, signal=37%
GOBP_ACTIVATION_OF_PROTEIN_KINASE_B_ACTIVITY	GOBP_ACTIVATION_OF_PROTEIN_KINASE_B_ACTIVITY	27	0.602939	1.60261	0.0184805	0.0807292	0.999	2953	tags=37%, list=19%, signal=46%
GOBP_NEGATIVE_REGULATION_OF_CD4_POSITIVE_ALPHA_BETA_T_CELL_DIFFERENTIATION	GOBP_NEGATIVE_REGULATION_OF_CD4_POSITIVE_ALPHA_BETA_T_CELL_DIFFERENTIATION	20	0.63501	1.60227	0.046748	0.0807988	0.999	3075	tags=45%, list=20%, signal=56%
GOBP_REGULATION_OF_LONG_TERM_SYNAPTIC_POTENTIATION	GOBP_REGULATION_OF_LONG_TERM_SYNAPTIC_POTENTIATION	41	0.615677	1.60213	0.00609756	0.0807633	0.999	3002	tags=46%, list=20%, signal=57%
GOBP_REGULATION_OF_BEHAVIOR	GOBP_REGULATION_OF_BEHAVIOR	62	0.55161	1.60203	0.00204918	0.0807284	0.999	1528	tags=26%, list=10%, signal=29%
GOBP_REGULATION_OF_SUPEROXIDE_ANION_GENERATION	GOBP_REGULATION_OF_SUPEROXIDE_ANION_GENERATION	21	0.648273	1.60198	0.0325203	0.0806522	0.999	4208	tags=67%, list=27%, signal=92%
GOBP_REGULATION_OF_RELEASE_OF_SEQUESTERED_CALCIUM_ION_INTO_CYTOSOL	GOBP_REGULATION_OF_RELEASE_OF_SEQUESTERED_CALCIUM_ION_INTO_CYTOSOL	70	0.565099	1.60176	0.00198807	0.0806585	0.999	3845	tags=56%, list=25%, signal=74%
GOBP_RESPONSE_TO_HYDROPEROXIDE	GOBP_RESPONSE_TO_HYDROPEROXIDE	16	0.597271	1.60159	0.0126582	0.0806554	0.999	4645	tags=56%, list=30%, signal=81%
GOBP_NITRIC_OXIDE_SYNTHASE_BIOSYNTHETIC_PROCESS	GOBP_NITRIC_OXIDE_SYNTHASE_BIOSYNTHETIC_PROCESS	19	0.711816	1.60148	0.0134357	0.0806084	0.999	2991	tags=63%, list=19%, signal=78%
GOBP_SKELETAL_MUSCLE_CONTRACTION	GOBP_SKELETAL_MUSCLE_CONTRACTION	39	0.633657	1.60141	0.0060241	0.0805344	0.999	2843	tags=46%, list=19%, signal=56%
GOBP_REGULATION_OF_GLYCOLYTIC_PROCESS	GOBP_REGULATION_OF_GLYCOLYTIC_PROCESS	43	0.491967	1.60095	0.0201207	0.0807206	0.999	2766	tags=28%, list=18%, signal=34%
GOBP_REGULATION_OF_CELL_COMMUNICATION_BY_ELECTRICAL_COUPLING	GOBP_REGULATION_OF_CELL_COMMUNICATION_BY_ELECTRICAL_COUPLING	15	0.732005	1.60077	0.0253165	0.0807198	0.999	1906	tags=53%, list=12%, signal=61%
GOBP_REACTIVE_NITROGEN_SPECIES_METABOLIC_PROCESS	GOBP_REACTIVE_NITROGEN_SPECIES_METABOLIC_PROCESS	70	0.553964	1.60075	0.010101	0.0806126	0.999	3294	tags=47%, list=21%, signal=60%
GOBP_ENGULFMENT_OF_APOPTOTIC_CELL	GOBP_ENGULFMENT_OF_APOPTOTIC_CELL	16	0.6608	1.60063	0.00793651	0.0805704	0.999	3126	tags=50%, list=20%, signal=63%
GOBP_REGULATION_OF_CARBOHYDRATE_CATABOLIC_PROCESS	GOBP_REGULATION_OF_CARBOHYDRATE_CATABOLIC_PROCESS	52	0.449274	1.60049	0.0179283	0.0805631	0.999	2766	tags=23%, list=18%, signal=28%
GOBP_FILOPODIUM_ASSEMBLY	GOBP_FILOPODIUM_ASSEMBLY	57	0.489122	1.59981	0.0158103	0.080868	0.999	3317	tags=33%, list=22%, signal=42%
GOBP_REGULATION_OF_PROTEIN_LOCALIZATION_TO_CELL_SURFACE	GOBP_REGULATION_OF_PROTEIN_LOCALIZATION_TO_CELL_SURFACE	37	0.538906	1.59978	0.0283401	0.080766	0.999	1854	tags=24%, list=12%, signal=28%
GOBP_NEUTROPHIL_CHEMOTAXIS	GOBP_NEUTROPHIL_CHEMOTAXIS	86	0.642874	1.59941	0.00614754	0.0809123	0.999	2532	tags=52%, list=16%, signal=62%
GOBP_POSITIVE_REGULATION_OF_FAT_CELL_DIFFERENTIATION	GOBP_POSITIVE_REGULATION_OF_FAT_CELL_DIFFERENTIATION	59	0.545096	1.59857	0.00852879	0.0814124	0.999	3858	tags=49%, list=25%, signal=65%
GOBP_REGULATION_OF_REACTIVE_OXYGEN_SPECIES_BIOSYNTHETIC_PROCESS	GOBP_REGULATION_OF_REACTIVE_OXYGEN_SPECIES_BIOSYNTHETIC_PROCESS	36	0.527777	1.59843	0.0121951	0.0813681	0.999	3114	tags=33%, list=20%, signal=42%
GOBP_NEGATIVE_REGULATION_OF_TRANSPORT	GOBP_NEGATIVE_REGULATION_OF_TRANSPORT	380	0.438621	1.59837	0	0.081286	0.999	3361	tags=30%, list=22%, signal=38%
GOBP_T_CELL_DIFFERENTIATION_INVOLVED_IN_IMMUNE_RESPONSE	GOBP_T_CELL_DIFFERENTIATION_INVOLVED_IN_IMMUNE_RESPONSE	71	0.605763	1.59837	0.033195	0.0811689	0.999	4276	tags=66%, list=28%, signal=91%
GOBP_NATURAL_KILLER_CELL_ACTIVATION_INVOLVED_IN_IMMUNE_RESPONSE	GOBP_NATURAL_KILLER_CELL_ACTIVATION_INVOLVED_IN_IMMUNE_RESPONSE	27	0.565876	1.5983	0.0259481	0.0810858	0.999	1989	tags=22%, list=13%, signal=25%
GOBP_NEGATIVE_REGULATION_OF_CELL_SUBSTRATE_ADHESION	GOBP_NEGATIVE_REGULATION_OF_CELL_SUBSTRATE_ADHESION	56	0.514353	1.59811	0.00584795	0.0811123	0.999	2101	tags=25%, list=14%, signal=29%
GOBP_POSITIVE_REGULATION_OF_CARDIAC_MUSCLE_CELL_PROLIFERATION	GOBP_POSITIVE_REGULATION_OF_CARDIAC_MUSCLE_CELL_PROLIFERATION	22	0.667041	1.598	0.0163265	0.0810633	0.999	1659	tags=45%, list=11%, signal=51%
GOBP_DENDRITIC_CELL_CHEMOTAXIS	GOBP_DENDRITIC_CELL_CHEMOTAXIS	24	0.756357	1.59735	0.00819672	0.0813689	0.999	1636	tags=54%, list=11%, signal=61%
GOBP_CORONARY_VASCULATURE_MORPHOGENESIS	GOBP_CORONARY_VASCULATURE_MORPHOGENESIS	18	0.667535	1.59703	0.015873	0.0814656	0.999	3440	tags=56%, list=22%, signal=72%
GOBP_ENDOCYTIC_RECYCLING	GOBP_ENDOCYTIC_RECYCLING	62	0.370427	1.59697	0.0258449	0.0813892	0.999	5704	tags=44%, list=37%, signal=69%
GOBP_NEGATIVE_REGULATION_OF_HUMORAL_IMMUNE_RESPONSE	GOBP_NEGATIVE_REGULATION_OF_HUMORAL_IMMUNE_RESPONSE	16	0.748024	1.59695	0.0095057	0.0812984	0.999	3160	tags=81%, list=21%, signal=102%
GOBP_REGULATION_OF_MYELOID_LEUKOCYTE_DIFFERENTIATION	GOBP_REGULATION_OF_MYELOID_LEUKOCYTE_DIFFERENTIATION	105	0.507066	1.5967	0.0199203	0.0813533	0.999	3806	tags=49%, list=25%, signal=64%
GOBP_CELL_RECOGNITION	GOBP_CELL_RECOGNITION	143	0.521177	1.59641	0.00203252	0.0814596	0.999	2829	tags=36%, list=18%, signal=43%
GOBP_NEUTROPHIL_MEDIATED_IMMUNITY	GOBP_NEUTROPHIL_MEDIATED_IMMUNITY	36	0.63757	1.59596	0.014862	0.0816753	0.999	2435	tags=44%, list=16%, signal=53%
GOBP_HEMOSTASIS	GOBP_HEMOSTASIS	213	0.509697	1.59528	0.00401606	0.0819382	0.999	3122	tags=40%, list=20%, signal=50%
GOBP_REGULATION_OF_ISOTYPE_SWITCHING	GOBP_REGULATION_OF_ISOTYPE_SWITCHING	30	0.579707	1.5952	0.0425101	0.0818856	0.999	2538	tags=37%, list=17%, signal=44%
GOBP_INOSITOL_PHOSPHATE_BIOSYNTHETIC_PROCESS	GOBP_INOSITOL_PHOSPHATE_BIOSYNTHETIC_PROCESS	27	0.628969	1.59504	0.0163599	0.0818694	0.999	2605	tags=41%, list=17%, signal=49%
GOBP_REGULATION_OF_PROTEIN_CONTAINING_COMPLEX_DISASSEMBLY	GOBP_REGULATION_OF_PROTEIN_CONTAINING_COMPLEX_DISASSEMBLY	108	0.425731	1.59491	0.00787402	0.0818423	0.999	4649	tags=45%, list=30%, signal=65%
GOBP_REGULATION_OF_CELL_SUBSTRATE_JUNCTION_ORGANIZATION	GOBP_REGULATION_OF_CELL_SUBSTRATE_JUNCTION_ORGANIZATION	67	0.475985	1.59488	0.0202429	0.0817525	0.999	4725	tags=46%, list=31%, signal=67%
GOBP_REGULATION_OF_NEUTROPHIL_MIGRATION	GOBP_REGULATION_OF_NEUTROPHIL_MIGRATION	42	0.615757	1.59486	0.0167715	0.0816566	0.999	3290	tags=57%, list=21%, signal=73%
GOBP_RENAL_SYSTEM_VASCULATURE_DEVELOPMENT	GOBP_RENAL_SYSTEM_VASCULATURE_DEVELOPMENT	29	0.657455	1.59485	0.022541	0.0815478	0.999	3419	tags=62%, list=22%, signal=80%
GOBP_INTERFERON_ALPHA_PRODUCTION	GOBP_INTERFERON_ALPHA_PRODUCTION	27	0.639949	1.5947	0.0320641	0.0815808	0.999	2323	tags=37%, list=15%, signal=44%
GOBP_SIGNAL_TRANSDUCTION_IN_ABSENCE_OF_LIGAND	GOBP_SIGNAL_TRANSDUCTION_IN_ABSENCE_OF_LIGAND	62	0.496037	1.59466	0.00203666	0.0814943	0.999	1265	tags=18%, list=8%, signal=19%
GOBP_POSITIVE_REGULATION_OF_TRANSMEMBRANE_TRANSPORT	GOBP_POSITIVE_REGULATION_OF_TRANSMEMBRANE_TRANSPORT	184	0.49757	1.59433	0	0.0816289	0.999	2995	tags=38%, list=20%, signal=47%
GOBP_REGULATION_OF_INTRACELLULAR_PROTEIN_TRANSPORT	GOBP_REGULATION_OF_INTRACELLULAR_PROTEIN_TRANSPORT	198	0.328695	1.59406	0.00203252	0.0817042	0.999	3568	tags=23%, list=23%, signal=30%
GOBP_SEMI_LUNAR_VALVE_DEVELOPMENT	GOBP_SEMI_LUNAR_VALVE_DEVELOPMENT	41	0.609512	1.59404	0.0223124	0.0816014	0.999	3832	tags=56%, list=25%, signal=75%
GOBP_POSITIVE_REGULATION_OF_TYPE_I_INTERFERON_PRODUCTION	GOBP_POSITIVE_REGULATION_OF_TYPE_I_INTERFERON_PRODUCTION	55	0.495779	1.59369	0.0499002	0.081783	0.999	2605	tags=27%, list=17%, signal=33%
GOBP_MYD88_DEPENDENT_TOLL_LIKE_RECEPTOR_SIGNALING_PATHWAY	GOBP_MYD88_DEPENDENT_TOLL_LIKE_RECEPTOR_SIGNALING_PATHWAY	24	0.66766	1.59314	0.0241935	0.0820017	0.999	3285	tags=58%, list=21%, signal=74%
GOBP_ACUTE_INFLAMMATORY_RESPONSE_TO_ANTIGENIC_STIMULUS	GOBP_ACUTE_INFLAMMATORY_RESPONSE_TO_ANTIGENIC_STIMULUS	21	0.727988	1.59293	0.00816326	0.0820272	0.999	3160	tags=57%, list=21%, signal=72%
GOBP_ENDOTHELIAL_CELL_DEVELOPMENT	GOBP_ENDOTHELIAL_CELL_DEVELOPMENT	66	0.487408	1.59233	0.0184426	0.0823313	0.999	3899	tags=47%, list=25%, signal=63%
GOBP_POSITIVE_REGULATION_OF_CALCIUM_ION_TRANSPORT_INTO_CYTOSOL	GOBP_POSITIVE_REGULATION_OF_CALCIUM_ION_TRANSPORT_INTO_CYTOSOL	50	0.58726	1.59224	0.00587084	0.0822807	0.999	3361	tags=52%, list=22%, signal=66%
GOBP_RECEPTOR_METABOLIC_PROCESS	GOBP_RECEPTOR_METABOLIC_PROCESS	152	0.421471	1.59217	0.010142	0.0822112	0.999	3747	tags=30%, list=24%, signal=40%
GOBP_ORGANISM_EMERGENCE_FROM_PROTECTIVE_STRUCTURE	GOBP_ORGANISM_EMERGENCE_FROM_PROTECTIVE_STRUCTURE	23	0.532537	1.59197	0.0233463	0.0822285	0.999	3071	tags=30%, list=20%, signal=38%
GOBP_MYELOID_LEUKOCYTE_CYTOKINE_PRODUCTION	GOBP_MYELOID_LEUKOCYTE_CYTOKINE_PRODUCTION	30	0.567377	1.59087	0.0317797	0.0827472	0.999	3875	tags=50%, list=25%, signal=67%
GOBP_REGULATION_OF_MEMBRANE_PROTEIN_ECTODOMAIN_PROTEOLYSIS	GOBP_REGULATION_OF_MEMBRANE_PROTEIN_ECTODOMAIN_PROTEOLYSIS	23	0.608624	1.59025	0.0142857	0.083046	0.999	3757	tags=52%, list=24%, signal=69%
GOBP_NEGATIVE_REGULATION_OF_RESPONSE_TO_ENDOPLASMIC_RETICULUM_STRESS	GOBP_NEGATIVE_REGULATION_OF_RESPONSE_TO_ENDOPLASMIC_RETICULUM_STRESS	38	0.422634	1.59	0.0539419	0.0831009	0.999	5155	tags=37%, list=34%, signal=55%
GOBP_NEGATIVE_REGULATION_OF_BLOOD_VESSEL_ENDOTHELIAL_CELL_MIGRATION	GOBP_NEGATIVE_REGULATION_OF_BLOOD_VESSEL_ENDOTHELIAL_CELL_MIGRATION	34	0.585472	1.58964	0.0242915	0.0832415	0.999	3021	tags=44%, list=20%, signal=55%
GOBP_MYOBLAST_DIFFERENTIATION	GOBP_MYOBLAST_DIFFERENTIATION	81	0.476237	1.58944	0.00386847	0.0832871	0.999	3044	tags=31%, list=20%, signal=38%
GOBP_MACROPHAGE_CYTOKINE_PRODUCTION	GOBP_MACROPHAGE_CYTOKINE_PRODUCTION	17	0.652132	1.5891	0.0327869	0.0833871	0.999	4595	tags=76%, list=30%, signal=109%
GOBP_NEGATIVE_REGULATION_OF_CELL_MATRIX_ADHESION	GOBP_NEGATIVE_REGULATION_OF_CELL_MATRIX_ADHESION	33	0.558955	1.58831	0.0119048	0.0838081	0.999	2101	tags=27%, list=14%, signal=32%
GOBP_POSITIVE_REGULATION_OF_ACTIN_CYTOSKELETON_REORGANIZATION	GOBP_POSITIVE_REGULATION_OF_ACTIN_CYTOSKELETON_REORGANIZATION	19	0.641997	1.58792	0.0168776	0.0839686	0.999	1845	tags=37%, list=12%, signal=42%
GOBP_REGULATION_OF_CARDIAC_MUSCLE_CONTRACTION_BY_CALCIUM_ION_SIGNALING	GOBP_REGULATION_OF_CARDIAC_MUSCLE_CONTRACTION_BY_CALCIUM_ION_SIGNALING	23	0.682349	1.5877	0.0125523	0.0840087	0.999	3556	tags=61%, list=23%, signal=79%
GOBP_REGULATION_OF_TRANSMEMBRANE_TRANSPORT	GOBP_REGULATION_OF_TRANSMEMBRANE_TRANSPORT	499	0.467444	1.58756	0.00194553	0.0839905	0.999	3737	tags=39%, list=24%, signal=50%
GOBP_POSITIVE_REGULATION_OF_SPROUTING_ANGIOGENESIS	GOBP_POSITIVE_REGULATION_OF_SPROUTING_ANGIOGENESIS	19	0.636515	1.58735	0.0162602	0.0840147	0.999	1649	tags=32%, list=11%, signal=35%
GOBP_MODULATION_BY_HOST_OF_VIRAL_PROCESS	GOBP_MODULATION_BY_HOST_OF_VIRAL_PROCESS	29	0.525377	1.58717	0.0163265	0.0840368	0.999	3024	tags=31%, list=20%, signal=39%
GOBP_PHOSPHATIDYLETHANOLAMINE_METABOLIC_PROCESS	GOBP_PHOSPHATIDYLETHANOLAMINE_METABOLIC_PROCESS	20	0.656524	1.58651	0.0222222	0.0843599	0.999	3091	tags=50%, list=20%, signal=63%
GOBP_MUSCLE_CELL_CELLULAR_HOMEOSTASIS	GOBP_MUSCLE_CELL_CELLULAR_HOMEOSTASIS	19	0.607963	1.5865	0.0138614	0.0842683	0.999	3978	tags=53%, list=26%, signal=71%
GOBP_POSITIVE_REGULATION_OF_PHOSPHOPROTEIN_PHOSPHATASE_ACTIVITY	GOBP_POSITIVE_REGULATION_OF_PHOSPHOPROTEIN_PHOSPHATASE_ACTIVITY	20	0.621646	1.58635	0.026694	0.084286	0.999	3538	tags=50%, list=23%, signal=65%
GOBP_REGULATION_OF_MUSCLE_SYSTEM_PROCESS	GOBP_REGULATION_OF_MUSCLE_SYSTEM_PROCESS	211	0.478723	1.58602	0.00200401	0.0844138	0.999	3731	tags=37%, list=24%, signal=48%
GOBP_NEGATIVE_REGULATION_OF_TRANSMEMBRANE_TRANSPORT	GOBP_NEGATIVE_REGULATION_OF_TRANSMEMBRANE_TRANSPORT	102	0.492541	1.5858	0.00626305	0.0844673	0.999	3627	tags=36%, list=24%, signal=47%
GOBP_MYELOID_CELL_HOMEOSTASIS	GOBP_MYELOID_CELL_HOMEOSTASIS	147	0.379855	1.5857	0.011976	0.0843983	0.999	4079	tags=32%, list=27%, signal=43%
GOBP_REGULATION_OF_PROTEIN_POLYMERIZATION	GOBP_REGULATION_OF_PROTEIN_POLYMERIZATION	179	0.407812	1.58557	0.011976	0.0843596	0.999	4267	tags=39%, list=28%, signal=53%
GOBP_NEGATIVE_REGULATION_OF_T_HELPER_CELL_DIFFERENTIATION	GOBP_NEGATIVE_REGULATION_OF_T_HELPER_CELL_DIFFERENTIATION	17	0.636339	1.58541	0.046	0.084361	0.999	3075	tags=47%, list=20%, signal=59%
GOBP_VASCULAR_ENDOTHELIAL_GROWTH_FACTOR_SIGNALING_PATHWAY	GOBP_VASCULAR_ENDOTHELIAL_GROWTH_FACTOR_SIGNALING_PATHWAY	39	0.570641	1.58537	0.0207039	0.0842708	0.999	3295	tags=49%, list=21%, signal=62%
GOBP_NEGATIVE_REGULATION_OF_LEUKOCYTE_APOPTOTIC_PROCESS	GOBP_NEGATIVE_REGULATION_OF_LEUKOCYTE_APOPTOTIC_PROCESS	47	0.587455	1.58507	0.018595	0.0843307	0.999	4073	tags=62%, list=27%, signal=84%
GOBP_NEGATIVE_REGULATION_OF_CHEMOTAXIS	GOBP_NEGATIVE_REGULATION_OF_CHEMOTAXIS	53	0.571352	1.58454	0	0.0845577	0.999	3349	tags=49%, list=22%, signal=63%
GOBP_NEGATIVE_REGULATION_OF_VIRAL_PROCESS	GOBP_NEGATIVE_REGULATION_OF_VIRAL_PROCESS	82	0.490609	1.58404	0.0264228	0.0847707	0.999	2795	tags=32%, list=18%, signal=39%
GOBP_NEGATIVE_REGULATION_OF_MACROPHAGE_ACTIVATION	GOBP_NEGATIVE_REGULATION_OF_MACROPHAGE_ACTIVATION	15	0.740112	1.58389	0.00421053	0.0847578	0.999	2927	tags=73%, list=19%, signal=91%
GOBP_REGULATION_OF_CELL_JUNCTION_ASSEMBLY	GOBP_REGULATION_OF_CELL_JUNCTION_ASSEMBLY	187	0.488705	1.58325	0.00191939	0.0850799	0.999	3794	tags=39%, list=25%, signal=51%
GOBP_MACROPHAGE_ACTIVATION_INVOLVED_IN_IMMUNE_RESPONSE	GOBP_MACROPHAGE_ACTIVATION_INVOLVED_IN_IMMUNE_RESPONSE	18	0.711674	1.58314	0.0153551	0.0850517	0.999	3109	tags=78%, list=20%, signal=97%
GOBP_POSITIVE_REGULATION_OF_INNATE_IMMUNE_RESPONSE	GOBP_POSITIVE_REGULATION_OF_INNATE_IMMUNE_RESPONSE	122	0.561535	1.58272	0.0327869	0.0852216	0.999	3358	tags=41%, list=22%, signal=52%
GOBP_ARTERY_DEVELOPMENT	GOBP_ARTERY_DEVELOPMENT	96	0.523161	1.58224	0.0120482	0.0853983	0.999	3440	tags=45%, list=22%, signal=57%
GOBP_T_HELPER_1_TYPE_IMMUNE_RESPONSE	GOBP_T_HELPER_1_TYPE_IMMUNE_RESPONSE	43	0.651365	1.58222	0.0209205	0.0852996	0.999	3314	tags=63%, list=22%, signal=80%
GOBP_POSITIVE_REGULATION_OF_PROTEIN_TYROSINE_KINASE_ACTIVITY	GOBP_POSITIVE_REGULATION_OF_PROTEIN_TYROSINE_KINASE_ACTIVITY	46	0.552148	1.58121	0.00592885	0.0857982	0.999	3715	tags=54%, list=24%, signal=71%
GOBP_REGULATION_OF_MUSCLE_HYPERTROPHY	GOBP_REGULATION_OF_MUSCLE_HYPERTROPHY	53	0.50793	1.58108	0.0221774	0.0857711	0.999	3627	tags=40%, list=24%, signal=52%
GOBP_ANTIGEN_PROCESSING_AND_PRESENTATION_OF_EXOGENOUS_PEPTIDE_ANTIGEN_VIA_MHC_CLASS_II	GOBP_ANTIGEN_PROCESSING_AND_PRESENTATION_OF_EXOGENOUS_PEPTIDE_ANTIGEN_VIA_MHC_CLASS_II	23	0.716145	1.58102	0.0144628	0.0856893	0.999	3871	tags=83%, list=25%, signal=110%
GOBP_NEGATIVE_REGULATION_OF_CATION_CHANNEL_ACTIVITY	GOBP_NEGATIVE_REGULATION_OF_CATION_CHANNEL_ACTIVITY	36	0.552655	1.58055	0.0144628	0.0858828	0.999	3269	tags=39%, list=21%, signal=49%
GOBP_ASTROCYTE_ACTIVATION	GOBP_ASTROCYTE_ACTIVATION	18	0.743727	1.58047	0.0141988	0.0858229	0.999	2986	tags=72%, list=19%, signal=90%
GOBP_REGULATION_OF_MACROPHAGE_DERIVED_FOAM_CELL_DIFFERENTIATION	GOBP_REGULATION_OF_MACROPHAGE_DERIVED_FOAM_CELL_DIFFERENTIATION	31	0.677941	1.5803	0.0159046	0.0858103	0.999	4372	tags=77%, list=28%, signal=108%
GOBP_NEUTROPHIL_ACTIVATION_INVOLVED_IN_IMMUNE_RESPONSE	GOBP_NEUTROPHIL_ACTIVATION_INVOLVED_IN_IMMUNE_RESPONSE	21	0.673356	1.5797	0.0211864	0.0860967	0.999	3399	tags=62%, list=22%, signal=79%
GOBP_CELLULAR_RESPONSE_TO_VIRUS	GOBP_CELLULAR_RESPONSE_TO_VIRUS	66	0.493476	1.57918	0.0286885	0.0863174	0.999	3900	tags=36%, list=25%, signal=49%
GOBP_POSITIVE_REGULATION_OF_LIPID_KINASE_ACTIVITY	GOBP_POSITIVE_REGULATION_OF_LIPID_KINASE_ACTIVITY	37	0.606585	1.57913	0.0227743	0.086234	0.999	3759	tags=59%, list=24%, signal=79%
GOBP_ANATOMICAL_STRUCTURE_HOMEOSTASIS	GOBP_ANATOMICAL_STRUCTURE_HOMEOSTASIS	291	0.4649	1.57893	0.00201207	0.0862722	0.999	3850	tags=39%, list=25%, signal=51%
GOBP_REGULATION_OF_ANION_TRANSMEMBRANE_TRANSPORT	GOBP_REGULATION_OF_ANION_TRANSMEMBRANE_TRANSPORT	22	0.624696	1.57875	0.0159046	0.0863089	0.999	3897	tags=55%, list=25%, signal=73%
GOBP_MHC_CLASS_II_BIOSYNTHETIC_PROCESS	GOBP_MHC_CLASS_II_BIOSYNTHETIC_PROCESS	16	0.693664	1.57795	0.0163934	0.0867302	0.999	2517	tags=50%, list=16%, signal=60%
GOBP_POSITIVE_REGULATION_OF_T_HELPER_CELL_DIFFERENTIATION	GOBP_POSITIVE_REGULATION_OF_T_HELPER_CELL_DIFFERENTIATION	21	0.692142	1.57748	0.0121457	0.08692	0.999	3795	tags=71%, list=25%, signal=95%
GOBP_NEGATIVE_REGULATION_OF_MAP_KINASE_ACTIVITY	GOBP_NEGATIVE_REGULATION_OF_MAP_KINASE_ACTIVITY	57	0.513195	1.57702	0.00761905	0.0871285	0.999	4729	tags=61%, list=31%, signal=88%
GOBP_REGULATION_OF_IMMUNOGLOBULIN_PRODUCTION	GOBP_REGULATION_OF_IMMUNOGLOBULIN_PRODUCTION	66	0.571289	1.57688	0.0427699	0.0871531	0.999	2849	tags=39%, list=19%, signal=48%
GOBP_MATURE_B_CELL_DIFFERENTIATION	GOBP_MATURE_B_CELL_DIFFERENTIATION	34	0.644886	1.57673	0.0279441	0.0871386	0.999	2098	tags=50%, list=14%, signal=58%
GOBP_REGULATION_OF_VASCULOGENESIS	GOBP_REGULATION_OF_VASCULOGENESIS	16	0.673948	1.57608	0.0121212	0.0874461	0.999	3539	tags=63%, list=23%, signal=81%
GOBP_REGULATION_OF_LYMPHOCYTE_APOPTOTIC_PROCESS	GOBP_REGULATION_OF_LYMPHOCYTE_APOPTOTIC_PROCESS	53	0.538759	1.5753	0.0243902	0.087863	0.999	3737	tags=49%, list=24%, signal=65%
GOBP_SMOOTH_MUSCLE_CONTRACTION	GOBP_SMOOTH_MUSCLE_CONTRACTION	103	0.543302	1.57526	0	0.0877821	0.999	2548	tags=36%, list=17%, signal=43%
GOBP_REGULATION_OF_ION_TRANSMEMBRANE_TRANSPORT	GOBP_REGULATION_OF_ION_TRANSMEMBRANE_TRANSPORT	422	0.479087	1.57494	0.00194932	0.0879123	0.999	3737	tags=41%, list=24%, signal=52%
GOBP_EPITHELIAL_TO_MESENCHYMAL_TRANSITION_INVOLVED_IN_ENDOCARDIAL_CUSHION_FORMATION	GOBP_EPITHELIAL_TO_MESENCHYMAL_TRANSITION_INVOLVED_IN_ENDOCARDIAL_CUSHION_FORMATION	20	0.649878	1.57434	0.0237069	0.0882174	0.999	4533	tags=70%, list=30%, signal=99%
GOBP_HUMORAL_IMMUNE_RESPONSE	GOBP_HUMORAL_IMMUNE_RESPONSE	211	0.558255	1.57431	0.0059761	0.0881326	0.999	3314	tags=47%, list=22%, signal=59%
GOBP_NEGATIVE_REGULATION_OF_INTERFERON_GAMMA_PRODUCTION	GOBP_NEGATIVE_REGULATION_OF_INTERFERON_GAMMA_PRODUCTION	34	0.670502	1.57384	0.0224033	0.0883337	0.999	2192	tags=59%, list=14%, signal=68%
GOBP_NEGATIVE_REGULATION_OF_PROTEIN_DEPHOSPHORYLATION	GOBP_NEGATIVE_REGULATION_OF_PROTEIN_DEPHOSPHORYLATION	31	0.511035	1.57365	0.0229885	0.0883887	0.999	3207	tags=29%, list=21%, signal=37%
GOBP_POSITIVE_REGULATION_OF_DEFENSE_RESPONSE_TO_VIRUS_BY_HOST	GOBP_POSITIVE_REGULATION_OF_DEFENSE_RESPONSE_TO_VIRUS_BY_HOST	27	0.625969	1.57353	0.0413386	0.088354	0.999	4606	tags=63%, list=30%, signal=90%
GOBP_DETECTION_OF_BIOTIC_STIMULUS	GOBP_DETECTION_OF_BIOTIC_STIMULUS	32	0.62776	1.5731	0.0324544	0.0885043	0.999	2422	tags=44%, list=16%, signal=52%
GOBP_MUCOPOLYSACCHARIDE_METABOLIC_PROCESS	GOBP_MUCOPOLYSACCHARIDE_METABOLIC_PROCESS	84	0.508554	1.57304	0.010395	0.0884359	0.999	3432	tags=42%, list=22%, signal=53%
GOBP_REGULATION_OF_MICROGLIAL_CELL_ACTIVATION	GOBP_REGULATION_OF_MICROGLIAL_CELL_ACTIVATION	15	0.73709	1.57266	0.00393701	0.088627	0.999	3282	tags=80%, list=21%, signal=102%
GOBP_POSITIVE_REGULATION_OF_SMOOTH_MUSCLE_CELL_MIGRATION	GOBP_POSITIVE_REGULATION_OF_SMOOTH_MUSCLE_CELL_MIGRATION	31	0.597716	1.57245	0.0204082	0.0886554	0.999	3295	tags=55%, list=21%, signal=70%
GOBP_HOMEOSTASIS_OF_NUMBER_OF_CELLS_WITHIN_A_TISSUE	GOBP_HOMEOSTASIS_OF_NUMBER_OF_CELLS_WITHIN_A_TISSUE	28	0.573533	1.57232	0.0135135	0.0886216	0.999	2335	tags=36%, list=15%, signal=42%
GOBP_TOLL_LIKE_RECEPTOR_2_SIGNALING_PATHWAY	GOBP_TOLL_LIKE_RECEPTOR_2_SIGNALING_PATHWAY	16	0.648651	1.57214	0.0448065	0.0886151	0.999	3845	tags=63%, list=25%, signal=83%
GOBP_REGULATION_OF_TRANSPORTER_ACTIVITY	GOBP_REGULATION_OF_TRANSPORTER_ACTIVITY	243	0.48103	1.57185	0.00192678	0.0887464	0.999	3053	tags=35%, list=20%, signal=42%
GOBP_NEGATIVE_REGULATION_OF_DEFENSE_RESPONSE_TO_VIRUS	GOBP_NEGATIVE_REGULATION_OF_DEFENSE_RESPONSE_TO_VIRUS	22	0.462462	1.57175	0.0542798	0.0887129	0.999	3932	tags=36%, list=26%, signal=49%
GOBP_POSITIVE_REGULATION_OF_CELL_KILLING	GOBP_POSITIVE_REGULATION_OF_CELL_KILLING	57	0.700356	1.57158	0.0159681	0.0886951	0.999	2018	tags=54%, list=13%, signal=62%
GOBP_DETECTION_OF_EXTERNAL_BIOTIC_STIMULUS	GOBP_DETECTION_OF_EXTERNAL_BIOTIC_STIMULUS	21	0.677872	1.57111	0.027668	0.088927	0.999	3487	tags=67%, list=23%, signal=86%
GOBP_REGULATION_OF_TRIGLYCERIDE_METABOLIC_PROCESS	GOBP_REGULATION_OF_TRIGLYCERIDE_METABOLIC_PROCESS	37	0.52947	1.57092	0.0210325	0.0889144	0.999	2249	tags=27%, list=15%, signal=32%
GOBP_REGULATION_OF_HEART_GROWTH	GOBP_REGULATION_OF_HEART_GROWTH	57	0.539434	1.57024	0.00806452	0.0892885	0.999	3627	tags=47%, list=24%, signal=62%
GOBP_PROTEIN_ADP_RIBOSYLATION	GOBP_PROTEIN_ADP_RIBOSYLATION	34	0.46591	1.57002	0.0282828	0.0893177	0.999	2540	tags=21%, list=17%, signal=25%
GOBP_REGULATION_OF_INOSITOL_PHOSPHATE_BIOSYNTHETIC_PROCESS	GOBP_REGULATION_OF_INOSITOL_PHOSPHATE_BIOSYNTHETIC_PROCESS	15	0.727399	1.56967	0.0164609	0.0894366	0.999	2302	tags=60%, list=15%, signal=71%
GOBP_FOCAL_ADHESION_ASSEMBLY	GOBP_FOCAL_ADHESION_ASSEMBLY	81	0.466282	1.56955	0.014553	0.089407	0.999	4817	tags=46%, list=31%, signal=66%
GOBP_NEGATIVE_REGULATION_OF_CD4_POSITIVE_ALPHA_BETA_T_CELL_ACTIVATION	GOBP_NEGATIVE_REGULATION_OF_CD4_POSITIVE_ALPHA_BETA_T_CELL_ACTIVATION	24	0.628665	1.56948	0.0351967	0.0893497	0.999	3075	tags=46%, list=20%, signal=57%
GOBP_POSITIVE_REGULATION_OF_ANTIGEN_RECEPTOR_MEDIATED_SIGNALING_PATHWAY	GOBP_POSITIVE_REGULATION_OF_ANTIGEN_RECEPTOR_MEDIATED_SIGNALING_PATHWAY	21	0.727643	1.5694	0.0286299	0.0892891	0.999	1418	tags=38%, list=9%, signal=42%
GOBP_POSITIVE_REGULATION_OF_ION_TRANSMEMBRANE_TRANSPORT	GOBP_POSITIVE_REGULATION_OF_ION_TRANSMEMBRANE_TRANSPORT	139	0.521229	1.56915	0.0019685	0.089371	0.999	2995	tags=42%, list=20%, signal=51%
GOBP_NEUTROPHIL_MIGRATION	GOBP_NEUTROPHIL_MIGRATION	109	0.59908	1.5691	0.0100806	0.0892925	0.999	3581	tags=57%, list=23%, signal=74%
GOBP_REGULATION_OF_METAL_ION_TRANSPORT	GOBP_REGULATION_OF_METAL_ION_TRANSPORT	346	0.477255	1.56896	0	0.0893065	0.999	3053	tags=37%, list=20%, signal=45%
GOBP_REGULATION_OF_PODOSOME_ASSEMBLY	GOBP_REGULATION_OF_PODOSOME_ASSEMBLY	15	0.650997	1.56864	0.0248963	0.0894112	0.999	3521	tags=53%, list=23%, signal=69%
GOBP_GRANULOCYTE_DIFFERENTIATION	GOBP_GRANULOCYTE_DIFFERENTIATION	35	0.553121	1.56819	0.028169	0.0895708	0.999	3806	tags=49%, list=25%, signal=64%
GOBP_REGULATION_OF_CARBOHYDRATE_METABOLIC_PROCESS	GOBP_REGULATION_OF_CARBOHYDRATE_METABOLIC_PROCESS	162	0.398514	1.56807	0.00803213	0.0895393	0.999	3177	tags=25%, list=21%, signal=32%
GOBP_AMYLOID_PRECURSOR_PROTEIN_CATABOLIC_PROCESS	GOBP_AMYLOID_PRECURSOR_PROTEIN_CATABOLIC_PROCESS	51	0.453946	1.5669	0.0318091	0.090272	0.999	3209	tags=31%, list=21%, signal=40%
GOBP_NEGATIVE_REGULATION_OF_T_CELL_RECEPTOR_SIGNALING_PATHWAY	GOBP_NEGATIVE_REGULATION_OF_T_CELL_RECEPTOR_SIGNALING_PATHWAY	25	0.669274	1.56673	0.0401606	0.090268	0.999	2508	tags=48%, list=16%, signal=57%
GOBP_NEGATIVE_REGULATION_OF_PHAGOCYTOSIS	GOBP_NEGATIVE_REGULATION_OF_PHAGOCYTOSIS	19	0.604729	1.56635	0.0401606	0.0903826	0.999	3320	tags=53%, list=22%, signal=67%
GOBP_BLOOD_VESSEL_ENDOTHELIAL_CELL_PROLIFERATION_INVOLVED_IN_SPROUTING_ANGIOGENESIS	GOBP_BLOOD_VESSEL_ENDOTHELIAL_CELL_PROLIFERATION_INVOLVED_IN_SPROUTING_ANGIOGENESIS	22	0.742644	1.56631	0.0177515	0.090297	0.999	2871	tags=68%, list=19%, signal=84%
GOBP_REGULATION_OF_MACROAUTOPHAGY	GOBP_REGULATION_OF_MACROAUTOPHAGY	149	0.294353	1.56533	0.0318471	0.0908799	0.999	3593	tags=18%, list=23%, signal=23%
GOBP_REGULATION_OF_HYDROGEN_PEROXIDE_METABOLIC_PROCESS	GOBP_REGULATION_OF_HYDROGEN_PEROXIDE_METABOLIC_PROCESS	17	0.591634	1.56523	0.0300601	0.0908483	0.999	3526	tags=35%, list=23%, signal=46%
GOBP_POSITIVE_CHEMOTAXIS	GOBP_POSITIVE_CHEMOTAXIS	49	0.589809	1.56513	0.0181818	0.0908163	0.999	3297	tags=53%, list=21%, signal=67%
GOBP_POSITIVE_REGULATION_OF_CALCINEURIN_MEDIATED_SIGNALING	GOBP_POSITIVE_REGULATION_OF_CALCINEURIN_MEDIATED_SIGNALING	15	0.672018	1.56492	0.0168067	0.0908178	0.999	3403	tags=47%, list=22%, signal=60%
GOBP_REGULATION_OF_RAC_PROTEIN_SIGNAL_TRANSDUCTION	GOBP_REGULATION_OF_RAC_PROTEIN_SIGNAL_TRANSDUCTION	21	0.53034	1.5647	0.0352251	0.0908569	0.999	3308	tags=43%, list=22%, signal=55%
GOBP_POSITIVE_REGULATION_OF_BIOMINERALIZATION	GOBP_POSITIVE_REGULATION_OF_BIOMINERALIZATION	47	0.582551	1.56462	0.00811359	0.0908182	0.999	3596	tags=49%, list=23%, signal=64%
GOBP_TISSUE_REMODELING	GOBP_TISSUE_REMODELING	155	0.489746	1.56415	0.00202429	0.0910395	0.999	3850	tags=45%, list=25%, signal=60%
GOBP_REGULATION_OF_RESPONSE_TO_REACTIVE_OXYGEN_SPECIES	GOBP_REGULATION_OF_RESPONSE_TO_REACTIVE_OXYGEN_SPECIES	28	0.561545	1.56397	0.0218688	0.0910554	0.999	1934	tags=36%, list=13%, signal=41%
GOBP_FAT_CELL_DIFFERENTIATION	GOBP_FAT_CELL_DIFFERENTIATION	208	0.43787	1.5639	0.00406504	0.0909857	0.999	4753	tags=46%, list=31%, signal=65%
GOBP_EXTRACELLULAR_MATRIX_ASSEMBLY	GOBP_EXTRACELLULAR_MATRIX_ASSEMBLY	44	0.576859	1.56351	0.0323232	0.0911837	0.999	3602	tags=43%, list=23%, signal=56%
GOBP_REGULATION_OF_CELL_MORPHOGENESIS	GOBP_REGULATION_OF_CELL_MORPHOGENESIS	283	0.389753	1.56321	0.00972763	0.0912963	0.999	3956	tags=35%, list=26%, signal=46%
GOBP_CELL_COMMUNICATION_BY_ELECTRICAL_COUPLING	GOBP_CELL_COMMUNICATION_BY_ELECTRICAL_COUPLING	32	0.637111	1.56296	0.0102459	0.0913162	0.999	3717	tags=59%, list=24%, signal=78%
GOBP_REGULATION_OF_T_HELPER_1_TYPE_IMMUNE_RESPONSE	GOBP_REGULATION_OF_T_HELPER_1_TYPE_IMMUNE_RESPONSE	29	0.704455	1.56282	0.0143443	0.091315	0.999	1966	tags=62%, list=13%, signal=71%
GOBP_REGULATION_OF_GLYCOPROTEIN_METABOLIC_PROCESS	GOBP_REGULATION_OF_GLYCOPROTEIN_METABOLIC_PROCESS	41	0.547271	1.5628	0.02	0.0912176	0.999	1957	tags=29%, list=13%, signal=33%
GOBP_NEGATIVE_REGULATION_OF_T_CELL_APOPTOTIC_PROCESS	GOBP_NEGATIVE_REGULATION_OF_T_CELL_APOPTOTIC_PROCESS	19	0.666642	1.5624	0.014553	0.0913672	0.999	3519	tags=63%, list=23%, signal=82%
GOBP_POSITIVE_REGULATION_OF_LIPID_METABOLIC_PROCESS	GOBP_POSITIVE_REGULATION_OF_LIPID_METABOLIC_PROCESS	139	0.493367	1.56186	0.00824742	0.0916392	0.999	2954	tags=35%, list=19%, signal=43%
GOBP_CD8_POSITIVE_ALPHA_BETA_T_CELL_ACTIVATION	GOBP_CD8_POSITIVE_ALPHA_BETA_T_CELL_ACTIVATION	23	0.768067	1.5615	0.0226337	0.0917736	0.999	2849	tags=78%, list=19%, signal=96%
GOBP_RESPONSE_TO_ATP	GOBP_RESPONSE_TO_ATP	28	0.590387	1.56122	0.0245399	0.0918507	0.999	2672	tags=43%, list=17%, signal=52%
GOBP_ASTROCYTE_DEVELOPMENT	GOBP_ASTROCYTE_DEVELOPMENT	37	0.624341	1.561	0.0207547	0.0919202	0.999	3377	tags=57%, list=22%, signal=73%
GOBP_TOLERANCE_INDUCTION	GOBP_TOLERANCE_INDUCTION	28	0.661263	1.56086	0.043299	0.0918969	0.999	3737	tags=71%, list=24%, signal=94%
GOBP_REACTIVE_OXYGEN_SPECIES_BIOSYNTHETIC_PROCESS	GOBP_REACTIVE_OXYGEN_SPECIES_BIOSYNTHETIC_PROCESS	48	0.537174	1.56058	0.01875	0.0919823	0.999	3114	tags=35%, list=20%, signal=44%
GOBP_PROGRAMMED_NECROTIC_CELL_DEATH	GOBP_PROGRAMMED_NECROTIC_CELL_DEATH	40	0.463346	1.56057	0.0408163	0.0918846	0.999	3593	tags=38%, list=23%, signal=49%
GOBP_ANTIGEN_PROCESSING_AND_PRESENTATION_OF_ENDOGENOUS_PEPTIDE_ANTIGEN	GOBP_ANTIGEN_PROCESSING_AND_PRESENTATION_OF_ENDOGENOUS_PEPTIDE_ANTIGEN	16	0.625521	1.56017	0.0160321	0.092078	0.999	4349	tags=81%, list=28%, signal=113%
GOBP_ERYTHROCYTE_HOMEOSTASIS	GOBP_ERYTHROCYTE_HOMEOSTASIS	121	0.373192	1.56002	0.016129	0.0920829	0.999	4079	tags=30%, list=27%, signal=40%
GOBP_NEGATIVE_REGULATION_OF_ERK1_AND_ERK2_CASCADE	GOBP_NEGATIVE_REGULATION_OF_ERK1_AND_ERK2_CASCADE	66	0.456941	1.5591	0.0139165	0.0926407	0.999	3323	tags=36%, list=22%, signal=46%
GOBP_POSITIVE_REGULATION_OF_PROTEIN_DEACETYLATION	GOBP_POSITIVE_REGULATION_OF_PROTEIN_DEACETYLATION	28	0.463216	1.55881	0.0321285	0.092733	0.999	2707	tags=21%, list=18%, signal=26%
GOBP_RUFFLE_ASSEMBLY	GOBP_RUFFLE_ASSEMBLY	41	0.467821	1.55875	0.0273438	0.0926652	0.999	1737	tags=24%, list=11%, signal=27%
GOBP_REGULATION_OF_SYSTEMIC_ARTERIAL_BLOOD_PRESSURE_MEDIATED_BY_A_CHEMICAL_SIGNAL	GOBP_REGULATION_OF_SYSTEMIC_ARTERIAL_BLOOD_PRESSURE_MEDIATED_BY_A_CHEMICAL_SIGNAL	47	0.638558	1.55839	0.00205339	0.0928282	0.999	1493	tags=32%, list=10%, signal=35%
GOBP_NEGATIVE_REGULATION_OF_ATP_DEPENDENT_ACTIVITY	GOBP_NEGATIVE_REGULATION_OF_ATP_DEPENDENT_ACTIVITY	18	0.610366	1.55827	0.014433	0.0928225	0.999	1711	tags=33%, list=11%, signal=37%
GOBP_POSITIVE_REGULATION_OF_B_CELL_ACTIVATION	GOBP_POSITIVE_REGULATION_OF_B_CELL_ACTIVATION	70	0.557248	1.55817	0.0495868	0.0927887	0.999	2538	tags=36%, list=17%, signal=43%
GOBP_SUPEROXIDE_ANION_GENERATION	GOBP_SUPEROXIDE_ANION_GENERATION	39	0.578047	1.55783	0.0185185	0.0929068	0.999	3026	tags=49%, list=20%, signal=61%
GOBP_REGULATION_OF_CELLULAR_COMPONENT_SIZE	GOBP_REGULATION_OF_CELLULAR_COMPONENT_SIZE	318	0.406127	1.55742	0.0059761	0.0931303	0.999	4275	tags=38%, list=28%, signal=51%
GOBP_DENDRITIC_CELL_CYTOKINE_PRODUCTION	GOBP_DENDRITIC_CELL_CYTOKINE_PRODUCTION	16	0.620402	1.55731	0.0205339	0.093123	0.999	2795	tags=50%, list=18%, signal=61%
GOBP_REGULATION_OF_B_CELL_PROLIFERATION	GOBP_REGULATION_OF_B_CELL_PROLIFERATION	62	0.609709	1.5573	0.0584677	0.0930133	0.999	3747	tags=58%, list=24%, signal=76%
GOBP_T_CELL_HOMEOSTASIS	GOBP_T_CELL_HOMEOSTASIS	38	0.577311	1.55716	0.0417495	0.0929873	0.999	3035	tags=42%, list=20%, signal=52%
GOBP_EMBRYONIC_HINDLIMB_MORPHOGENESIS	GOBP_EMBRYONIC_HINDLIMB_MORPHOGENESIS	26	0.635588	1.55698	0.0343434	0.0929984	0.999	1605	tags=31%, list=10%, signal=34%
GOBP_NEGATIVE_REGULATION_OF_RECEPTOR_SIGNALING_PATHWAY_VIA_STAT	GOBP_NEGATIVE_REGULATION_OF_RECEPTOR_SIGNALING_PATHWAY_VIA_STAT	23	0.583519	1.55672	0.0207039	0.0930694	0.999	1407	tags=30%, list=9%, signal=33%
GOBP_POSITIVE_REGULATION_OF_NOTCH_SIGNALING_PATHWAY	GOBP_POSITIVE_REGULATION_OF_NOTCH_SIGNALING_PATHWAY	41	0.491465	1.55648	0.0245399	0.093163	0.999	2096	tags=22%, list=14%, signal=25%
GOBP_LUNG_MORPHOGENESIS	GOBP_LUNG_MORPHOGENESIS	49	0.525179	1.5562	0.033543	0.0932485	0.999	2504	tags=31%, list=16%, signal=36%
GOBP_POSITIVE_REGULATION_OF_TYROSINE_PHOSPHORYLATION_OF_STAT_PROTEIN	GOBP_POSITIVE_REGULATION_OF_TYROSINE_PHOSPHORYLATION_OF_STAT_PROTEIN	60	0.561446	1.55617	0	0.093154	0.999	2098	tags=35%, list=14%, signal=40%
GOBP_NEGATIVE_REGULATION_OF_NATURAL_KILLER_CELL_MEDIATED_IMMUNITY	GOBP_NEGATIVE_REGULATION_OF_NATURAL_KILLER_CELL_MEDIATED_IMMUNITY	15	0.719171	1.55615	0.0294118	0.0930512	0.999	3459	tags=73%, list=23%, signal=95%
GOBP_REGULATION_OF_AMYLOID_BETA_CLEARANCE	GOBP_REGULATION_OF_AMYLOID_BETA_CLEARANCE	17	0.632887	1.55605	0.0223124	0.0930133	0.999	2986	tags=47%, list=19%, signal=58%
GOBP_ACTIN_FILAMENT_DEPOLYMERIZATION	GOBP_ACTIN_FILAMENT_DEPOLYMERIZATION	50	0.513614	1.55587	0.0230326	0.0930285	0.999	4352	tags=56%, list=28%, signal=78%
GOBP_REGULATION_OF_CYTOSKELETON_ORGANIZATION	GOBP_REGULATION_OF_CYTOSKELETON_ORGANIZATION	476	0.367977	1.5554	0.00400802	0.0932597	0.999	3925	tags=34%, list=26%, signal=44%
GOBP_RESPONSE_TO_ETHANOL	GOBP_RESPONSE_TO_ETHANOL	115	0.49339	1.55494	0.00202429	0.093482	0.999	4146	tags=44%, list=27%, signal=60%
GOBP_STRIATED_MUSCLE_CONTRACTION	GOBP_STRIATED_MUSCLE_CONTRACTION	159	0.503091	1.55478	0.0038835	0.0934672	0.999	2452	tags=31%, list=16%, signal=37%
GOBP_T_HELPER_1_CELL_DIFFERENTIATION	GOBP_T_HELPER_1_CELL_DIFFERENTIATION	20	0.673171	1.55449	0.0258065	0.0935477	0.999	4207	tags=70%, list=27%, signal=96%
GOBP_POSITIVE_REGULATION_OF_NITRIC_OXIDE_SYNTHASE_BIOSYNTHETIC_PROCESS	GOBP_POSITIVE_REGULATION_OF_NITRIC_OXIDE_SYNTHASE_BIOSYNTHETIC_PROCESS	17	0.714057	1.55422	0.0213178	0.093631	0.999	2991	tags=65%, list=19%, signal=80%
GOBP_RESPONSE_TO_PEPTIDE	GOBP_RESPONSE_TO_PEPTIDE	442	0.397613	1.55419	0.00193798	0.0935438	0.999	3116	tags=28%, list=20%, signal=34%
GOBP_ADENYLATE_CYCLASE_ACTIVATING_ADRENERGIC_RECEPTOR_SIGNALING_PATHWAY	GOBP_ADENYLATE_CYCLASE_ACTIVATING_ADRENERGIC_RECEPTOR_SIGNALING_PATHWAY	24	0.657211	1.55407	0.0208768	0.0935023	0.999	2736	tags=50%, list=18%, signal=61%
GOBP_PIGMENT_CELL_DIFFERENTIATION	GOBP_PIGMENT_CELL_DIFFERENTIATION	32	0.565187	1.55263	0.0180723	0.0944015	0.999	2762	tags=41%, list=18%, signal=49%
GOBP_MONOVALENT_INORGANIC_CATION_HOMEOSTASIS	GOBP_MONOVALENT_INORGANIC_CATION_HOMEOSTASIS	140	0.468197	1.55218	0.00588235	0.0946332	0.999	3629	tags=36%, list=24%, signal=46%
GOBP_RESPONSE_TO_FUNGUS	GOBP_RESPONSE_TO_FUNGUS	56	0.596456	1.55208	0.0178926	0.0946061	0.999	4024	tags=55%, list=26%, signal=75%
GOBP_REGULATION_OF_NEUTROPHIL_CHEMOTAXIS	GOBP_REGULATION_OF_NEUTROPHIL_CHEMOTAXIS	29	0.630879	1.55204	0.0313152	0.0945182	0.999	2516	tags=52%, list=16%, signal=62%
GOBP_HYALURONAN_METABOLIC_PROCESS	GOBP_HYALURONAN_METABOLIC_PROCESS	27	0.627522	1.55188	0.0195695	0.0945052	0.999	2925	tags=48%, list=19%, signal=59%
GOBP_POST_EMBRYONIC_ANIMAL_ORGAN_DEVELOPMENT	GOBP_POST_EMBRYONIC_ANIMAL_ORGAN_DEVELOPMENT	16	0.612252	1.55175	0.0431211	0.0944788	0.999	3036	tags=44%, list=20%, signal=54%
GOBP_GANGLIOSIDE_BIOSYNTHETIC_PROCESS	GOBP_GANGLIOSIDE_BIOSYNTHETIC_PROCESS	15	0.662234	1.5517	0.0292276	0.094397	0.999	3263	tags=47%, list=21%, signal=59%
GOBP_CELLULAR_RESPONSE_TO_PEPTIDE	GOBP_CELLULAR_RESPONSE_TO_PEPTIDE	324	0.398367	1.55151	0	0.0944347	0.999	3114	tags=27%, list=20%, signal=34%
GOBP_NEGATIVE_REGULATION_OF_MYOBLAST_DIFFERENTIATION	GOBP_NEGATIVE_REGULATION_OF_MYOBLAST_DIFFERENTIATION	24	0.622296	1.5514	0.0136187	0.0944072	0.999	2895	tags=54%, list=19%, signal=67%
GOBP_POSITIVE_REGULATION_OF_LEUKOCYTE_APOPTOTIC_PROCESS	GOBP_POSITIVE_REGULATION_OF_LEUKOCYTE_APOPTOTIC_PROCESS	23	0.599306	1.55121	0.0245399	0.0944452	0.999	3737	tags=52%, list=24%, signal=69%
GOBP_NEGATIVE_REGULATION_OF_T_CELL_MEDIATED_IMMUNITY	GOBP_NEGATIVE_REGULATION_OF_T_CELL_MEDIATED_IMMUNITY	26	0.700003	1.55102	0.0391753	0.0944428	0.999	2035	tags=54%, list=13%, signal=62%
GOBP_REGULATION_OF_CIRCADIAN_SLEEP_WAKE_CYCLE	GOBP_REGULATION_OF_CIRCADIAN_SLEEP_WAKE_CYCLE	16	0.685572	1.55056	0.0163265	0.0945954	0.999	1462	tags=38%, list=10%, signal=41%
GOBP_POSITIVE_REGULATION_OF_MONOCYTE_CHEMOTAXIS	GOBP_POSITIVE_REGULATION_OF_MONOCYTE_CHEMOTAXIS	19	0.691482	1.54919	0.0223124	0.0953754	0.999	2902	tags=63%, list=19%, signal=78%
GOBP_REGULATION_OF_BODY_FLUID_LEVELS	GOBP_REGULATION_OF_BODY_FLUID_LEVELS	360	0.457438	1.54917	0.00195312	0.0952772	0.999	3122	tags=33%, list=20%, signal=41%
GOBP_RESPONSE_TO_AMINO_ACID_STARVATION	GOBP_RESPONSE_TO_AMINO_ACID_STARVATION	45	0.398062	1.54906	0.0365854	0.0952651	0.999	4669	tags=33%, list=30%, signal=48%
GOBP_PROTEIN_TARGETING_TO_LYSOSOME	GOBP_PROTEIN_TARGETING_TO_LYSOSOME	22	0.422082	1.54899	0.0657371	0.0952016	0.999	5939	tags=64%, list=39%, signal=104%
GOBP_REGULATION_OF_BLOOD_PRESSURE	GOBP_REGULATION_OF_BLOOD_PRESSURE	170	0.515806	1.54885	0.00421053	0.095218	0.999	3677	tags=42%, list=24%, signal=55%
GOBP_REGULATION_OF_ORGAN_GROWTH	GOBP_REGULATION_OF_ORGAN_GROWTH	82	0.495403	1.54862	0.0119284	0.0952489	0.999	3953	tags=45%, list=26%, signal=60%
GOBP_REGULATION_OF_DEFENSE_RESPONSE_TO_VIRUS_BY_HOST	GOBP_REGULATION_OF_DEFENSE_RESPONSE_TO_VIRUS_BY_HOST	36	0.603988	1.54812	0.0371094	0.0954911	0.999	4606	tags=58%, list=30%, signal=83%
GOBP_POSITIVE_REGULATION_OF_UBIQUITIN_DEPENDENT_PROTEIN_CATABOLIC_PROCESS	GOBP_POSITIVE_REGULATION_OF_UBIQUITIN_DEPENDENT_PROTEIN_CATABOLIC_PROCESS	99	0.335826	1.54807	0.0225873	0.0954287	0.999	2006	tags=15%, list=13%, signal=17%
GOBP_REGULATION_OF_MUSCLE_CONTRACTION	GOBP_REGULATION_OF_MUSCLE_CONTRACTION	150	0.494132	1.54774	0.00400802	0.0955427	0.999	2851	tags=33%, list=19%, signal=41%
GOBP_CELLULAR_COMPONENT_ASSEMBLY_INVOLVED_IN_MORPHOGENESIS	GOBP_CELLULAR_COMPONENT_ASSEMBLY_INVOLVED_IN_MORPHOGENESIS	103	0.499631	1.5474	0.0115607	0.0956443	0.999	3422	tags=36%, list=22%, signal=46%
GOBP_REGULATION_OF_T_HELPER_17_TYPE_IMMUNE_RESPONSE	GOBP_REGULATION_OF_T_HELPER_17_TYPE_IMMUNE_RESPONSE	24	0.651747	1.54701	0.0413386	0.0958133	0.999	3090	tags=54%, list=20%, signal=68%
GOBP_IMMUNOLOGICAL_SYNAPSE_FORMATION	GOBP_IMMUNOLOGICAL_SYNAPSE_FORMATION	15	0.756848	1.54645	0.0282828	0.0960711	0.999	2695	tags=67%, list=18%, signal=81%
GOBP_REGULATION_OF_SMOOTH_MUSCLE_CELL_DIFFERENTIATION	GOBP_REGULATION_OF_SMOOTH_MUSCLE_CELL_DIFFERENTIATION	28	0.566253	1.54641	0.0227743	0.0959883	0.999	4390	tags=54%, list=29%, signal=75%
GOBP_INFLAMMASOME_COMPLEX_ASSEMBLY	GOBP_INFLAMMASOME_COMPLEX_ASSEMBLY	20	0.650821	1.54559	0.0391753	0.0964751	0.999	3098	tags=65%, list=20%, signal=81%
GOBP_REGULATION_OF_CALCIUM_ION_TRANSMEMBRANE_TRANSPORTER_ACTIVITY	GOBP_REGULATION_OF_CALCIUM_ION_TRANSMEMBRANE_TRANSPORTER_ACTIVITY	73	0.544566	1.54478	0.0120482	0.0969392	0.999	3556	tags=45%, list=23%, signal=59%
GOBP_PULMONARY_VALVE_DEVELOPMENT	GOBP_PULMONARY_VALVE_DEVELOPMENT	21	0.627458	1.54436	0.0255864	0.0971098	0.999	3832	tags=62%, list=25%, signal=82%
GOBP_VESICLE_MEDIATED_TRANSPORT_TO_THE_PLASMA_MEMBRANE	GOBP_VESICLE_MEDIATED_TRANSPORT_TO_THE_PLASMA_MEMBRANE	122	0.317216	1.54355	0.0220441	0.0975234	0.999	5704	tags=42%, list=37%, signal=66%
GOBP_RESPONSE_TO_ALCOHOL	GOBP_RESPONSE_TO_ALCOHOL	217	0.460783	1.54351	0.00613497	0.0974476	0.999	4146	tags=40%, list=27%, signal=54%
GOBP_CLATHRIN_COAT_ASSEMBLY	GOBP_CLATHRIN_COAT_ASSEMBLY	16	0.561668	1.54348	0.0398406	0.0973724	0.999	3134	tags=38%, list=20%, signal=47%
GOBP_REGULATION_OF_PROTEIN_SERINE_THREONINE_KINASE_ACTIVITY	GOBP_REGULATION_OF_PROTEIN_SERINE_THREONINE_KINASE_ACTIVITY	344	0.396105	1.54339	0.00398406	0.0973387	0.999	3737	tags=35%, list=24%, signal=45%
GOBP_SYNAPTIC_MEMBRANE_ADHESION	GOBP_SYNAPTIC_MEMBRANE_ADHESION	25	0.684602	1.5433	0.00972763	0.0972776	0.999	1920	tags=44%, list=13%, signal=50%
GOBP_REGULATION_OF_APOPTOTIC_SIGNALING_PATHWAY	GOBP_REGULATION_OF_APOPTOTIC_SIGNALING_PATHWAY	322	0.355936	1.54294	0.0100402	0.0974433	0.999	3136	tags=20%, list=20%, signal=25%
GOBP_LYMPH_VESSEL_MORPHOGENESIS	GOBP_LYMPH_VESSEL_MORPHOGENESIS	22	0.653553	1.54273	0.0310559	0.097497	0.999	3850	tags=59%, list=25%, signal=79%
GOBP_RESPONSE_TO_CHEMOKINE	GOBP_RESPONSE_TO_CHEMOKINE	77	0.650283	1.54249	0.0124224	0.097602	0.999	2532	tags=53%, list=16%, signal=63%
GOBP_REGULATION_OF_T_CELL_RECEPTOR_SIGNALING_PATHWAY	GOBP_REGULATION_OF_T_CELL_RECEPTOR_SIGNALING_PATHWAY	41	0.643176	1.54198	0.0653061	0.0978431	0.999	2083	tags=37%, list=14%, signal=42%
GOBP_REGULATION_OF_MACROPHAGE_ACTIVATION	GOBP_REGULATION_OF_MACROPHAGE_ACTIVATION	52	0.611544	1.54178	0.0226804	0.0978762	0.999	3091	tags=56%, list=20%, signal=70%
GOBP_ENDOSOMAL_TRANSPORT	GOBP_ENDOSOMAL_TRANSPORT	193	0.279653	1.54174	0.036	0.0978081	0.999	6006	tags=40%, list=39%, signal=66%
GOBP_HEART_PROCESS	GOBP_HEART_PROCESS	232	0.487777	1.54158	0.00195312	0.0978055	0.999	3717	tags=41%, list=24%, signal=53%
GOBP_ENDOTHELIAL_CELL_APOPTOTIC_PROCESS	GOBP_ENDOTHELIAL_CELL_APOPTOTIC_PROCESS	52	0.577128	1.54139	0.0216535	0.0978313	0.999	1610	tags=38%, list=10%, signal=43%
GOBP_GLOMERULUS_DEVELOPMENT	GOBP_GLOMERULUS_DEVELOPMENT	64	0.574896	1.54132	0.0211416	0.0977796	0.999	3850	tags=52%, list=25%, signal=69%
GOBP_RESPIRATORY_GASEOUS_EXCHANGE_BY_RESPIRATORY_SYSTEM	GOBP_RESPIRATORY_GASEOUS_EXCHANGE_BY_RESPIRATORY_SYSTEM	63	0.52657	1.54088	0.0124481	0.0980544	0.999	2696	tags=35%, list=18%, signal=42%
GOBP_PROTEIN_LOCALIZATION_TO_PLASMA_MEMBRANE	GOBP_PROTEIN_LOCALIZATION_TO_PLASMA_MEMBRANE	265	0.360844	1.54037	0.0117878	0.0983174	0.999	3195	tags=26%, list=21%, signal=32%
GOBP_NEGATIVE_REGULATION_OF_AMYLOID_PRECURSOR_PROTEIN_CATABOLIC_PROCESS	GOBP_NEGATIVE_REGULATION_OF_AMYLOID_PRECURSOR_PROTEIN_CATABOLIC_PROCESS	20	0.58311	1.53923	0.0493827	0.0990215	0.999	2083	tags=35%, list=14%, signal=40%
GOBP_POSITIVE_REGULATION_OF_MYELOID_LEUKOCYTE_CYTOKINE_PRODUCTION_INVOLVED_IN_IMMUNE_RESPONSE	GOBP_POSITIVE_REGULATION_OF_MYELOID_LEUKOCYTE_CYTOKINE_PRODUCTION_INVOLVED_IN_IMMUNE_RESPONSE	23	0.552751	1.53905	0.0349076	0.0990888	0.999	3875	tags=48%, list=25%, signal=64%
GOBP_RESPIRATORY_BURST	GOBP_RESPIRATORY_BURST	29	0.619697	1.53902	0.0692464	0.0990057	0.999	2907	tags=48%, list=19%, signal=59%
GOBP_REGULATION_OF_PEPTIDASE_ACTIVITY	GOBP_REGULATION_OF_PEPTIDASE_ACTIVITY	395	0.426082	1.53842	0.00386847	0.0993117	0.999	3160	tags=31%, list=21%, signal=39%
GOBP_REGULATION_OF_BICELLULAR_TIGHT_JUNCTION_ASSEMBLY	GOBP_REGULATION_OF_BICELLULAR_TIGHT_JUNCTION_ASSEMBLY	20	0.551368	1.53841	0.0339703	0.0992115	0.999	3794	tags=45%, list=25%, signal=60%
GOBP_BONE_RESORPTION	GOBP_BONE_RESORPTION	61	0.519842	1.53812	0.0117417	0.0993115	0.999	4274	tags=56%, list=28%, signal=77%
GOBP_HETEROPHILIC_CELL_CELL_ADHESION_VIA_PLASMA_MEMBRANE_CELL_ADHESION_MOLECULES	GOBP_HETEROPHILIC_CELL_CELL_ADHESION_VIA_PLASMA_MEMBRANE_CELL_ADHESION_MOLECULES	35	0.624643	1.53792	0.0100806	0.0993233	0.999	2687	tags=46%, list=17%, signal=55%
GOBP_LIPOPROTEIN_LOCALIZATION	GOBP_LIPOPROTEIN_LOCALIZATION	16	0.6632	1.53771	0.0278884	0.0993869	0.999	698	tags=25%, list=5%, signal=26%
GOBP_OUTFLOW_TRACT_MORPHOGENESIS	GOBP_OUTFLOW_TRACT_MORPHOGENESIS	78	0.53102	1.53751	0.0317797	0.0993913	0.999	3850	tags=53%, list=25%, signal=70%
GOBP_REGULATION_OF_AMYLOID_PRECURSOR_PROTEIN_CATABOLIC_PROCESS	GOBP_REGULATION_OF_AMYLOID_PRECURSOR_PROTEIN_CATABOLIC_PROCESS	38	0.506006	1.53728	0.0289855	0.0994414	0.999	3209	tags=37%, list=21%, signal=46%
GOBP_CELL_PROLIFERATION_INVOLVED_IN_KIDNEY_DEVELOPMENT	GOBP_CELL_PROLIFERATION_INVOLVED_IN_KIDNEY_DEVELOPMENT	21	0.649826	1.53656	0.0103734	0.0998602	0.999	3385	tags=62%, list=22%, signal=79%
GOBP_POSITIVE_REGULATION_OF_EXTRINSIC_APOPTOTIC_SIGNALING_PATHWAY	GOBP_POSITIVE_REGULATION_OF_EXTRINSIC_APOPTOTIC_SIGNALING_PATHWAY	48	0.48807	1.53646	0.0365112	0.099819	0.999	1992	tags=25%, list=13%, signal=29%
GOBP_REGULATION_OF_HUMORAL_IMMUNE_RESPONSE_MEDIATED_BY_CIRCULATING_IMMUNOGLOBULIN	GOBP_REGULATION_OF_HUMORAL_IMMUNE_RESPONSE_MEDIATED_BY_CIRCULATING_IMMUNOGLOBULIN	18	0.73297	1.53609	0.0136452	0.100017	0.999	2508	tags=72%, list=16%, signal=86%
GOBP_RESPONSE_TO_PROTOZOAN	GOBP_RESPONSE_TO_PROTOZOAN	23	0.698735	1.53605	0.0184426	0.0999222	0.999	3314	tags=70%, list=22%, signal=89%
GOBP_CELL_COMMUNICATION_BY_ELECTRICAL_COUPLING_INVOLVED_IN_CARDIAC_CONDUCTION	GOBP_CELL_COMMUNICATION_BY_ELECTRICAL_COUPLING_INVOLVED_IN_CARDIAC_CONDUCTION	25	0.634228	1.53555	0.0285714	0.10016	0.999	1906	tags=40%, list=12%, signal=46%
GOBP_REGULATION_OF_PLASMA_LIPOPROTEIN_PARTICLE_LEVELS	GOBP_REGULATION_OF_PLASMA_LIPOPROTEIN_PARTICLE_LEVELS	70	0.551324	1.53554	0.0117647	0.100061	0.999	4501	tags=59%, list=29%, signal=82%
GOBP_DOPAMINE_RECEPTOR_SIGNALING_PATHWAY	GOBP_DOPAMINE_RECEPTOR_SIGNALING_PATHWAY	36	0.521807	1.53546	0.0328542	0.1	0.999	3646	tags=42%, list=24%, signal=55%
GOBP_REGULATION_OF_SMOOTH_MUSCLE_CONTRACTION	GOBP_REGULATION_OF_SMOOTH_MUSCLE_CONTRACTION	57	0.56268	1.53523	0.00603622	0.100064	0.999	2548	tags=40%, list=17%, signal=48%
GOBP_MUSCLE_HYPERTROPHY	GOBP_MUSCLE_HYPERTROPHY	79	0.485372	1.53505	0.034	0.100093	0.999	3922	tags=38%, list=26%, signal=51%
GOBP_POSITIVE_REGULATION_OF_NEURON_PROJECTION_DEVELOPMENT	GOBP_POSITIVE_REGULATION_OF_NEURON_PROJECTION_DEVELOPMENT	134	0.46053	1.53495	0.0178571	0.100072	0.999	3750	tags=38%, list=24%, signal=50%
GOBP_POSITIVE_REGULATION_OF_INTERLEUKIN_4_PRODUCTION	GOBP_POSITIVE_REGULATION_OF_INTERLEUKIN_4_PRODUCTION	23	0.714441	1.53449	0.0227743	0.100304	0.999	2018	tags=57%, list=13%, signal=65%
GOBP_POSITIVE_REGULATION_OF_TOLL_LIKE_RECEPTOR_SIGNALING_PATHWAY	GOBP_POSITIVE_REGULATION_OF_TOLL_LIKE_RECEPTOR_SIGNALING_PATHWAY	26	0.57167	1.53392	0.0355731	0.10056	0.999	4036	tags=54%, list=26%, signal=73%
GOBP_CYTOKINE_PRODUCTION_INVOLVED_IN_INFLAMMATORY_RESPONSE	GOBP_CYTOKINE_PRODUCTION_INVOLVED_IN_INFLAMMATORY_RESPONSE	53	0.556624	1.53384	0.0321285	0.100537	0.999	3098	tags=47%, list=20%, signal=59%
GOBP_MULTICELLULAR_ORGANISMAL_MOVEMENT	GOBP_MULTICELLULAR_ORGANISMAL_MOVEMENT	52	0.555156	1.5338	0.0122951	0.100457	0.999	3286	tags=40%, list=21%, signal=51%
GOBP_POSITIVE_REGULATION_OF_CALCIUM_ION_TRANSMEMBRANE_TRANSPORT	GOBP_POSITIVE_REGULATION_OF_CALCIUM_ION_TRANSMEMBRANE_TRANSPORT	62	0.54488	1.53369	0.00795229	0.100441	1	3397	tags=48%, list=22%, signal=62%
GOBP_AXON_EXTENSION	GOBP_AXON_EXTENSION	115	0.447056	1.53359	0.0213178	0.10041	1	3631	tags=37%, list=24%, signal=47%
GOBP_SMOOTH_MUSCLE_CELL_DIFFERENTIATION	GOBP_SMOOTH_MUSCLE_CELL_DIFFERENTIATION	56	0.553147	1.53354	0.0210526	0.100337	1	2477	tags=38%, list=16%, signal=45%
GOBP_EXTERNAL_ENCAPSULATING_STRUCTURE_ORGANIZATION	GOBP_EXTERNAL_ENCAPSULATING_STRUCTURE_ORGANIZATION	283	0.517742	1.53353	0.034413	0.100239	1	3392	tags=39%, list=22%, signal=49%
GOBP_MYOTUBE_DIFFERENTIATION	GOBP_MYOTUBE_DIFFERENTIATION	105	0.454837	1.53345	0.00792079	0.100175	1	3195	tags=32%, list=21%, signal=41%
GOBP_T_HELPER_2_CELL_DIFFERENTIATION	GOBP_T_HELPER_2_CELL_DIFFERENTIATION	15	0.645538	1.53316	0.0519751	0.100288	1	3486	tags=53%, list=23%, signal=69%
GOBP_REGULATION_OF_CATION_CHANNEL_ACTIVITY	GOBP_REGULATION_OF_CATION_CHANNEL_ACTIVITY	145	0.485759	1.53308	0.00583658	0.10024	1	3024	tags=37%, list=20%, signal=46%
GOBP_RESPONSE_TO_PROSTAGLANDIN_E	GOBP_RESPONSE_TO_PROSTAGLANDIN_E	22	0.626414	1.53287	0.0309278	0.10029	1	1356	tags=32%, list=9%, signal=35%
GOBP_NEGATIVE_REGULATION_OF_SUPRAMOLECULAR_FIBER_ORGANIZATION	GOBP_NEGATIVE_REGULATION_OF_SUPRAMOLECULAR_FIBER_ORGANIZATION	145	0.425839	1.53286	0.0221328	0.100187	1	3665	tags=39%, list=24%, signal=50%
GOBP_PHASIC_SMOOTH_MUSCLE_CONTRACTION	GOBP_PHASIC_SMOOTH_MUSCLE_CONTRACTION	22	0.621728	1.53285	0.0181452	0.100087	1	2516	tags=41%, list=16%, signal=49%
GOBP_REGULATION_OF_MULTICELLULAR_ORGANISM_GROWTH	GOBP_REGULATION_OF_MULTICELLULAR_ORGANISM_GROWTH	61	0.473163	1.53259	0.0239044	0.100174	1	2902	tags=30%, list=19%, signal=36%
GOBP_NEGATIVE_REGULATION_OF_INTERLEUKIN_10_PRODUCTION	GOBP_NEGATIVE_REGULATION_OF_INTERLEUKIN_10_PRODUCTION	18	0.716964	1.53216	0.0219561	0.100368	1	1996	tags=56%, list=13%, signal=64%
GOBP_REGULATION_OF_ACUTE_INFLAMMATORY_RESPONSE	GOBP_REGULATION_OF_ACUTE_INFLAMMATORY_RESPONSE	43	0.623556	1.53154	0.0139442	0.100704	1	2394	tags=49%, list=16%, signal=58%
GOBP_POSITIVE_REGULATION_OF_ENDOTHELIAL_CELL_APOPTOTIC_PROCESS	GOBP_POSITIVE_REGULATION_OF_ENDOTHELIAL_CELL_APOPTOTIC_PROCESS	15	0.702345	1.53124	0.018595	0.100833	1	3358	tags=67%, list=22%, signal=85%
GOBP_REGULATION_OF_VASCULAR_ENDOTHELIAL_GROWTH_FACTOR_RECEPTOR_SIGNALING_PATHWAY	GOBP_REGULATION_OF_VASCULAR_ENDOTHELIAL_GROWTH_FACTOR_RECEPTOR_SIGNALING_PATHWAY	26	0.565879	1.53077	0.0321285	0.101077	1	2966	tags=42%, list=19%, signal=52%
GOBP_CELLULAR_RESPONSE_TO_LOW_DENSITY_LIPOPROTEIN_PARTICLE_STIMULUS	GOBP_CELLULAR_RESPONSE_TO_LOW_DENSITY_LIPOPROTEIN_PARTICLE_STIMULUS	17	0.67359	1.53054	0.0264766	0.101143	1	3297	tags=59%, list=21%, signal=75%
GOBP_CELL_CELL_ADHESION_VIA_PLASMA_MEMBRANE_ADHESION_MOLECULES	GOBP_CELL_CELL_ADHESION_VIA_PLASMA_MEMBRANE_ADHESION_MOLECULES	236	0.522976	1.53052	0.00582524	0.101057	1	3631	tags=43%, list=24%, signal=56%
GOBP_CELLULAR_RESPONSE_TO_EXTERNAL_STIMULUS	GOBP_CELLULAR_RESPONSE_TO_EXTERNAL_STIMULUS	281	0.376579	1.53047	0.00803213	0.100983	1	2864	tags=23%, list=19%, signal=28%
GOBP_POSITIVE_REGULATION_OF_HEART_GROWTH	GOBP_POSITIVE_REGULATION_OF_HEART_GROWTH	31	0.617188	1.53037	0.0184426	0.100974	1	2516	tags=48%, list=16%, signal=58%
GOBP_ESTABLISHMENT_OF_CELL_POLARITY	GOBP_ESTABLISHMENT_OF_CELL_POLARITY	135	0.376012	1.53022	0.0123457	0.10099	1	4032	tags=32%, list=26%, signal=43%
GOBP_REGULATION_OF_ANATOMICAL_STRUCTURE_SIZE	GOBP_REGULATION_OF_ANATOMICAL_STRUCTURE_SIZE	444	0.430192	1.53005	0.00401606	0.101	1	3418	tags=32%, list=22%, signal=40%
GOBP_NEGATIVE_REGULATION_OF_CARDIAC_MUSCLE_TISSUE_GROWTH	GOBP_NEGATIVE_REGULATION_OF_CARDIAC_MUSCLE_TISSUE_GROWTH	21	0.54979	1.52998	0.0318725	0.100945	1	4187	tags=52%, list=27%, signal=72%
GOBP_REGULATION_OF_PROTEIN_TYROSINE_KINASE_ACTIVITY	GOBP_REGULATION_OF_PROTEIN_TYROSINE_KINASE_ACTIVITY	78	0.456719	1.52979	0.031746	0.100967	1	3002	tags=37%, list=20%, signal=46%
GOBP_REGULATION_OF_RIG_I_SIGNALING_PATHWAY	GOBP_REGULATION_OF_RIG_I_SIGNALING_PATHWAY	17	0.552679	1.52949	0.0615711	0.101053	1	3821	tags=41%, list=25%, signal=55%
GOBP_REGULATION_OF_MONOCYTE_DIFFERENTIATION	GOBP_REGULATION_OF_MONOCYTE_DIFFERENTIATION	17	0.558615	1.52943	0.0525253	0.100998	1	5620	tags=76%, list=37%, signal=120%
GOBP_EPITHELIAL_CELL_PROLIFERATION	GOBP_EPITHELIAL_CELL_PROLIFERATION	371	0.457256	1.52925	0.00205339	0.101018	1	3419	tags=36%, list=22%, signal=45%
GOBP_PEROXISOME_PROLIFERATOR_ACTIVATED_RECEPTOR_SIGNALING_PATHWAY	GOBP_PEROXISOME_PROLIFERATOR_ACTIVATED_RECEPTOR_SIGNALING_PATHWAY	21	0.591118	1.52884	0.0272537	0.101176	1	3385	tags=48%, list=22%, signal=61%
GOBP_NEGATIVE_REGULATION_OF_PROTEIN_LOCALIZATION	GOBP_NEGATIVE_REGULATION_OF_PROTEIN_LOCALIZATION	171	0.391875	1.52869	0.0135135	0.101176	1	4811	tags=36%, list=31%, signal=51%
GOBP_CELLULAR_RESPONSE_TO_REACTIVE_OXYGEN_SPECIES	GOBP_CELLULAR_RESPONSE_TO_REACTIVE_OXYGEN_SPECIES	127	0.382209	1.52856	0.0181818	0.101171	1	2794	tags=25%, list=18%, signal=31%
GOBP_AORTA_DEVELOPMENT	GOBP_AORTA_DEVELOPMENT	58	0.517575	1.52748	0.0368098	0.102038	1	3440	tags=45%, list=22%, signal=58%
GOBP_PROTEIN_TETRAMERIZATION	GOBP_PROTEIN_TETRAMERIZATION	85	0.421802	1.52724	0.018	0.102096	1	3312	tags=27%, list=22%, signal=34%
GOBP_NEGATIVE_REGULATION_OF_EPITHELIAL_CELL_MIGRATION	GOBP_NEGATIVE_REGULATION_OF_EPITHELIAL_CELL_MIGRATION	65	0.488272	1.52703	0.0197239	0.10216	1	3174	tags=40%, list=21%, signal=50%
GOBP_NEGATIVE_REGULATION_OF_PEPTIDYL_SERINE_PHOSPHORYLATION	GOBP_NEGATIVE_REGULATION_OF_PEPTIDYL_SERINE_PHOSPHORYLATION	24	0.511595	1.52692	0.026749	0.102139	1	4557	tags=54%, list=30%, signal=77%
GOBP_NEGATIVE_REGULATION_OF_B_CELL_MEDIATED_IMMUNITY	GOBP_NEGATIVE_REGULATION_OF_B_CELL_MEDIATED_IMMUNITY	16	0.696938	1.52692	0.0207939	0.102035	1	3119	tags=63%, list=20%, signal=78%
GOBP_NEGATIVE_REGULATION_OF_PROTEIN_LOCALIZATION_TO_NUCLEUS	GOBP_NEGATIVE_REGULATION_OF_PROTEIN_LOCALIZATION_TO_NUCLEUS	32	0.532549	1.52678	0.0325866	0.102037	1	2545	tags=28%, list=17%, signal=34%
GOBP_T_HELPER_CELL_LINEAGE_COMMITMENT	GOBP_T_HELPER_CELL_LINEAGE_COMMITMENT	17	0.725635	1.5263	0.0319361	0.102275	1	2098	tags=53%, list=14%, signal=61%
GOBP_ADRENERGIC_RECEPTOR_SIGNALING_PATHWAY	GOBP_ADRENERGIC_RECEPTOR_SIGNALING_PATHWAY	29	0.610986	1.52546	0.0383795	0.102835	1	4343	tags=59%, list=28%, signal=82%
GOBP_REGULATION_OF_CARDIOCYTE_DIFFERENTIATION	GOBP_REGULATION_OF_CARDIOCYTE_DIFFERENTIATION	25	0.609941	1.52542	0.0219561	0.102755	1	3440	tags=56%, list=22%, signal=72%
GOBP_MUSCLE_CELL_DIFFERENTIATION	GOBP_MUSCLE_CELL_DIFFERENTIATION	325	0.437463	1.52466	0.00792079	0.103172	1	3627	tags=35%, list=24%, signal=45%
GOBP_POSITIVE_REGULATION_OF_RECEPTOR_MEDIATED_ENDOCYTOSIS	GOBP_POSITIVE_REGULATION_OF_RECEPTOR_MEDIATED_ENDOCYTOSIS	51	0.502373	1.5237	0.0334728	0.103793	1	4396	tags=51%, list=29%, signal=71%
GOBP_RELAXATION_OF_CARDIAC_MUSCLE	GOBP_RELAXATION_OF_CARDIAC_MUSCLE	17	0.667877	1.52367	0.039749	0.103693	1	3551	tags=65%, list=23%, signal=84%
GOBP_PROTEIN_KINASE_C_SIGNALING	GOBP_PROTEIN_KINASE_C_SIGNALING	30	0.548463	1.52363	0.0366599	0.103609	1	3899	tags=50%, list=25%, signal=67%
GOBP_MAMMARY_GLAND_MORPHOGENESIS	GOBP_MAMMARY_GLAND_MORPHOGENESIS	41	0.552773	1.52356	0.0360721	0.103547	1	4121	tags=56%, list=27%, signal=76%
GOBP_AMINOGLYCAN_CATABOLIC_PROCESS	GOBP_AMINOGLYCAN_CATABOLIC_PROCESS	29	0.576689	1.52339	0.0335306	0.103588	1	2943	tags=38%, list=19%, signal=47%
GOBP_POSITIVE_REGULATION_OF_BONE_MINERALIZATION	GOBP_POSITIVE_REGULATION_OF_BONE_MINERALIZATION	38	0.587657	1.52287	0.0100806	0.103946	1	3596	tags=53%, list=23%, signal=69%
GOBP_REGULATION_OF_RECEPTOR_SIGNALING_PATHWAY_VIA_STAT	GOBP_REGULATION_OF_RECEPTOR_SIGNALING_PATHWAY_VIA_STAT	95	0.48202	1.52272	0.00598802	0.103948	1	3610	tags=37%, list=24%, signal=48%
GOBP_PINOCYTOSIS	GOBP_PINOCYTOSIS	22	0.493722	1.52234	0.0774059	0.104124	1	4245	tags=41%, list=28%, signal=56%
GOBP_REGULATION_OF_CARDIAC_MUSCLE_CONTRACTION_BY_REGULATION_OF_THE_RELEASE_OF_SEQUESTERED_CALCIUM_ION	GOBP_REGULATION_OF_CARDIAC_MUSCLE_CONTRACTION_BY_REGULATION_OF_THE_RELEASE_OF_SEQUESTERED_CALCIUM_ION	19	0.708547	1.52219	0.0320513	0.104133	1	1711	tags=47%, list=11%, signal=53%
GOBP_PROTEIN_POLYMERIZATION	GOBP_PROTEIN_POLYMERIZATION	243	0.376803	1.52212	0.0140845	0.104096	1	4267	tags=37%, list=28%, signal=50%
GOBP_POSITIVE_REGULATION_OF_EPITHELIAL_CELL_PROLIFERATION	GOBP_POSITIVE_REGULATION_OF_EPITHELIAL_CELL_PROLIFERATION	176	0.483565	1.52198	0.00994036	0.104099	1	3419	tags=36%, list=22%, signal=46%
GOBP_CHOLESTEROL_EFFLUX	GOBP_CHOLESTEROL_EFFLUX	52	0.520741	1.52192	0.0193424	0.104034	1	4501	tags=54%, list=29%, signal=76%
GOBP_POSITIVE_REGULATION_OF_B_CELL_MEDIATED_IMMUNITY	GOBP_POSITIVE_REGULATION_OF_B_CELL_MEDIATED_IMMUNITY	32	0.61781	1.52177	0.0562249	0.104034	1	2849	tags=50%, list=19%, signal=61%
GOBP_CALCIUM_MEDIATED_SIGNALING_USING_INTRACELLULAR_CALCIUM_SOURCE	GOBP_CALCIUM_MEDIATED_SIGNALING_USING_INTRACELLULAR_CALCIUM_SOURCE	19	0.636763	1.52175	0.0316832	0.103945	1	3702	tags=63%, list=24%, signal=83%
GOBP_AORTIC_VALVE_MORPHOGENESIS	GOBP_AORTIC_VALVE_MORPHOGENESIS	32	0.619065	1.52107	0.0331263	0.104373	1	3832	tags=53%, list=25%, signal=71%
GOBP_NEGATIVE_REGULATION_OF_POTASSIUM_ION_TRANSPORT	GOBP_NEGATIVE_REGULATION_OF_POTASSIUM_ION_TRANSPORT	28	0.649508	1.52097	0.0176817	0.104341	1	2089	tags=39%, list=14%, signal=45%
GOBP_REGULATION_OF_VIRAL_ENTRY_INTO_HOST_CELL	GOBP_REGULATION_OF_VIRAL_ENTRY_INTO_HOST_CELL	39	0.528998	1.52062	0.0479167	0.104523	1	2730	tags=31%, list=18%, signal=37%
GOBP_RESPONSE_TO_PURINE_CONTAINING_COMPOUND	GOBP_RESPONSE_TO_PURINE_CONTAINING_COMPOUND	126	0.488164	1.52058	0.00409836	0.104444	1	2672	tags=36%, list=17%, signal=43%
GOBP_RESPONSE_TO_AXON_INJURY	GOBP_RESPONSE_TO_AXON_INJURY	75	0.460283	1.52055	0.011811	0.104372	1	3737	tags=41%, list=24%, signal=54%
GOBP_NEGATIVE_REGULATION_OF_VIRAL_ENTRY_INTO_HOST_CELL	GOBP_NEGATIVE_REGULATION_OF_VIRAL_ENTRY_INTO_HOST_CELL	22	0.598126	1.52044	0.0329897	0.104353	1	759	tags=23%, list=5%, signal=24%
GOBP_PHOSPHATIDYLINOSITOL_METABOLIC_PROCESS	GOBP_PHOSPHATIDYLINOSITOL_METABOLIC_PROCESS	145	0.337537	1.51965	0.0138889	0.10483	1	4583	tags=38%, list=30%, signal=54%
GOBP_NEGATIVE_REGULATION_OF_MYELOID_LEUKOCYTE_DIFFERENTIATION	GOBP_NEGATIVE_REGULATION_OF_MYELOID_LEUKOCYTE_DIFFERENTIATION	45	0.530387	1.51952	0.0361446	0.104824	1	3806	tags=49%, list=25%, signal=65%
GOBP_EPITHELIAL_CELL_APOPTOTIC_PROCESS	GOBP_EPITHELIAL_CELL_APOPTOTIC_PROCESS	101	0.477285	1.51946	0.0245902	0.104767	1	3409	tags=42%, list=22%, signal=53%
GOBP_REGULATION_OF_MYELOID_CELL_APOPTOTIC_PROCESS	GOBP_REGULATION_OF_MYELOID_CELL_APOPTOTIC_PROCESS	25	0.52789	1.51939	0.0365112	0.104716	1	2373	tags=36%, list=15%, signal=43%
GOBP_PIGMENT_GRANULE_ORGANIZATION	GOBP_PIGMENT_GRANULE_ORGANIZATION	24	0.503636	1.51893	0.0513834	0.104945	1	2762	tags=29%, list=18%, signal=36%
GOBP_REGULATION_OF_BIOMINERALIZATION	GOBP_REGULATION_OF_BIOMINERALIZATION	90	0.511076	1.51893	0.012	0.104841	1	3717	tags=42%, list=24%, signal=55%
GOBP_ANTIFUNGAL_INNATE_IMMUNE_RESPONSE	GOBP_ANTIFUNGAL_INNATE_IMMUNE_RESPONSE	17	0.714084	1.5186	0.0336134	0.105014	1	2605	tags=59%, list=17%, signal=71%
GOBP_SODIUM_ION_HOMEOSTASIS	GOBP_SODIUM_ION_HOMEOSTASIS	53	0.549912	1.51807	0.0100402	0.105313	1	3029	tags=38%, list=20%, signal=47%
GOBP_REGULATION_OF_VIRAL_INDUCED_CYTOPLASMIC_PATTERN_RECOGNITION_RECEPTOR_SIGNALING_PATHWAY	GOBP_REGULATION_OF_VIRAL_INDUCED_CYTOPLASMIC_PATTERN_RECOGNITION_RECEPTOR_SIGNALING_PATHWAY	18	0.535847	1.51789	0.0690377	0.105369	1	2263	tags=28%, list=15%, signal=33%
GOBP_NEGATIVE_REGULATION_OF_VIRAL_LIFE_CYCLE	GOBP_NEGATIVE_REGULATION_OF_VIRAL_LIFE_CYCLE	25	0.573125	1.51778	0.0268595	0.105362	1	3129	tags=36%, list=20%, signal=45%
GOBP_PHOSPHOLIPID_METABOLIC_PROCESS	GOBP_PHOSPHOLIPID_METABOLIC_PROCESS	339	0.359944	1.51737	0.0139721	0.10555	1	3540	tags=27%, list=23%, signal=34%
GOBP_REGULATION_OF_ANTIGEN_PROCESSING_AND_PRESENTATION	GOBP_REGULATION_OF_ANTIGEN_PROCESSING_AND_PRESENTATION	20	0.743141	1.51734	0.0273109	0.10547	1	2486	tags=70%, list=16%, signal=83%
GOBP_FEAR_RESPONSE	GOBP_FEAR_RESPONSE	35	0.580329	1.51713	0.0201613	0.105535	1	1875	tags=31%, list=12%, signal=36%
GOBP_REGULATION_OF_THE_FORCE_OF_HEART_CONTRACTION	GOBP_REGULATION_OF_THE_FORCE_OF_HEART_CONTRACTION	25	0.620297	1.51629	0.0301205	0.10604	1	3397	tags=48%, list=22%, signal=62%
GOBP_GLOMERULAR_EPITHELIUM_DEVELOPMENT	GOBP_GLOMERULAR_EPITHELIUM_DEVELOPMENT	25	0.593986	1.51625	0.0281125	0.105951	1	4545	tags=64%, list=30%, signal=91%
GOBP_REGULATION_OF_NMDA_RECEPTOR_ACTIVITY	GOBP_REGULATION_OF_NMDA_RECEPTOR_ACTIVITY	22	0.642881	1.51595	0.0301811	0.106103	1	1563	tags=32%, list=10%, signal=35%
GOBP_INTERLEUKIN_17_PRODUCTION	GOBP_INTERLEUKIN_17_PRODUCTION	36	0.640916	1.51587	0.0476191	0.106058	1	2585	tags=56%, list=17%, signal=67%
GOBP_REGULATION_OF_LEUKOCYTE_TETHERING_OR_ROLLING	GOBP_REGULATION_OF_LEUKOCYTE_TETHERING_OR_ROLLING	16	0.73371	1.51538	0.0255864	0.106327	1	2524	tags=69%, list=16%, signal=82%
GOBP_CHOLESTEROL_STORAGE	GOBP_CHOLESTEROL_STORAGE	18	0.645123	1.51509	0.045738	0.106439	1	4016	tags=61%, list=26%, signal=83%
GOBP_POSITIVE_REGULATION_OF_T_CELL_MEDIATED_CYTOTOXICITY	GOBP_POSITIVE_REGULATION_OF_T_CELL_MEDIATED_CYTOTOXICITY	25	0.704032	1.51492	0.0254902	0.106472	1	1916	tags=52%, list=12%, signal=59%
GOBP_POSITIVE_REGULATION_OF_ACTIN_FILAMENT_BUNDLE_ASSEMBLY	GOBP_POSITIVE_REGULATION_OF_ACTIN_FILAMENT_BUNDLE_ASSEMBLY	57	0.463052	1.51434	0.0364372	0.106817	1	4767	tags=44%, list=31%, signal=63%
GOBP_NEGATIVE_REGULATION_OF_CARBOHYDRATE_METABOLIC_PROCESS	GOBP_NEGATIVE_REGULATION_OF_CARBOHYDRATE_METABOLIC_PROCESS	40	0.45519	1.51432	0.0298805	0.106727	1	2788	tags=20%, list=18%, signal=24%
GOBP_LYTIC_VACUOLE_ORGANIZATION	GOBP_LYTIC_VACUOLE_ORGANIZATION	65	0.360122	1.51415	0.0539419	0.106765	1	5289	tags=42%, list=34%, signal=63%
GOBP_POSITIVE_REGULATION_OF_PROTEIN_LOCALIZATION_TO_CELL_SURFACE	GOBP_POSITIVE_REGULATION_OF_PROTEIN_LOCALIZATION_TO_CELL_SURFACE	17	0.597567	1.5138	0.04	0.106935	1	1416	tags=29%, list=9%, signal=32%
GOBP_REGULATION_OF_LIPID_METABOLIC_PROCESS	GOBP_REGULATION_OF_LIPID_METABOLIC_PROCESS	296	0.411864	1.51346	0.00956023	0.107141	1	3318	tags=31%, list=22%, signal=39%
GOBP_ESTABLISHMENT_OR_MAINTENANCE_OF_CELL_POLARITY	GOBP_ESTABLISHMENT_OR_MAINTENANCE_OF_CELL_POLARITY	206	0.362419	1.51309	0.004158	0.107318	1	3741	tags=28%, list=24%, signal=37%
GOBP_ATRIOVENTRICULAR_VALVE_DEVELOPMENT	GOBP_ATRIOVENTRICULAR_VALVE_DEVELOPMENT	26	0.582837	1.51263	0.0577689	0.107579	1	4153	tags=58%, list=27%, signal=79%
GOBP_BASEMENT_MEMBRANE_ORGANIZATION	GOBP_BASEMENT_MEMBRANE_ORGANIZATION	32	0.566164	1.51262	0.0456349	0.107476	1	3322	tags=38%, list=22%, signal=48%
GOBP_CELLULAR_MONOVALENT_INORGANIC_CATION_HOMEOSTASIS	GOBP_CELLULAR_MONOVALENT_INORGANIC_CATION_HOMEOSTASIS	97	0.455185	1.51226	0.0136986	0.107596	1	3629	tags=35%, list=24%, signal=46%
GOBP_MEMBRANE_REPOLARIZATION	GOBP_MEMBRANE_REPOLARIZATION	44	0.596281	1.51225	0.045098	0.107497	1	2387	tags=36%, list=16%, signal=43%
GOBP_CHONDROITIN_SULFATE_PROTEOGLYCAN_METABOLIC_PROCESS	GOBP_CHONDROITIN_SULFATE_PROTEOGLYCAN_METABOLIC_PROCESS	33	0.547706	1.51223	0.0346939	0.107408	1	3376	tags=42%, list=22%, signal=54%
GOBP_NEGATIVE_REGULATION_OF_DEPHOSPHORYLATION	GOBP_NEGATIVE_REGULATION_OF_DEPHOSPHORYLATION	41	0.451631	1.51148	0.032	0.107885	1	4675	tags=39%, list=30%, signal=56%
GOBP_POSITIVE_REGULATION_OF_MYELOID_CELL_DIFFERENTIATION	GOBP_POSITIVE_REGULATION_OF_MYELOID_CELL_DIFFERENTIATION	86	0.453617	1.51138	0.0218254	0.107847	1	4585	tags=51%, list=30%, signal=73%
GOBP_NEGATIVE_REGULATION_OF_VASCULAR_ASSOCIATED_SMOOTH_MUSCLE_CELL_PROLIFERATION	GOBP_NEGATIVE_REGULATION_OF_VASCULAR_ASSOCIATED_SMOOTH_MUSCLE_CELL_PROLIFERATION	21	0.638311	1.51108	0.0454545	0.107991	1	4729	tags=67%, list=31%, signal=96%
GOBP_REGULATION_OF_CELLULAR_PROTEIN_CATABOLIC_PROCESS	GOBP_REGULATION_OF_CELLULAR_PROTEIN_CATABOLIC_PROCESS	228	0.279568	1.51079	0.0265849	0.108108	1	4985	tags=31%, list=32%, signal=45%
GOBP_PHOSPHOLIPASE_C_ACTIVATING_G_PROTEIN_COUPLED_RECEPTOR_SIGNALING_PATHWAY	GOBP_PHOSPHOLIPASE_C_ACTIVATING_G_PROTEIN_COUPLED_RECEPTOR_SIGNALING_PATHWAY	97	0.547816	1.51058	0.00595238	0.108176	1	3677	tags=48%, list=24%, signal=63%
GOBP_NEGATIVE_REGULATION_OF_ION_TRANSPORT	GOBP_NEGATIVE_REGULATION_OF_ION_TRANSPORT	126	0.497155	1.51027	0.0121212	0.108353	1	3627	tags=41%, list=24%, signal=54%
GOBP_VESICLE_ORGANIZATION	GOBP_VESICLE_ORGANIZATION	270	0.293203	1.50997	0.0177165	0.108464	1	5375	tags=36%, list=35%, signal=54%
GOBP_REGULATION_OF_PROGRAMMED_NECROTIC_CELL_DEATH	GOBP_REGULATION_OF_PROGRAMMED_NECROTIC_CELL_DEATH	22	0.475086	1.50992	0.0630081	0.108393	1	4492	tags=50%, list=29%, signal=71%
GOBP_CELLULAR_RESPONSE_TO_INTERFERON_BETA	GOBP_CELLULAR_RESPONSE_TO_INTERFERON_BETA	20	0.577709	1.50976	0.0596421	0.108423	1	2766	tags=35%, list=18%, signal=43%
GOBP_HEART_TRABECULA_MORPHOGENESIS	GOBP_HEART_TRABECULA_MORPHOGENESIS	30	0.57498	1.50946	0.0231579	0.10859	1	2096	tags=33%, list=14%, signal=39%
GOBP_CIRCADIAN_SLEEP_WAKE_CYCLE	GOBP_CIRCADIAN_SLEEP_WAKE_CYCLE	19	0.629608	1.50901	0.0268041	0.108837	1	1462	tags=32%, list=10%, signal=35%
GOBP_POSITIVE_REGULATION_OF_INTERFERON_ALPHA_PRODUCTION	GOBP_POSITIVE_REGULATION_OF_INTERFERON_ALPHA_PRODUCTION	21	0.588066	1.50899	0.0631164	0.108743	1	2323	tags=29%, list=15%, signal=34%
GOBP_POSITIVE_REGULATION_OF_NEUTROPHIL_MIGRATION	GOBP_POSITIVE_REGULATION_OF_NEUTROPHIL_MIGRATION	30	0.600154	1.50878	0.0412371	0.108798	1	2907	tags=50%, list=19%, signal=62%
GOBP_RIG_I_SIGNALING_PATHWAY	GOBP_RIG_I_SIGNALING_PATHWAY	25	0.472492	1.50876	0.0925926	0.108708	1	3900	tags=36%, list=25%, signal=48%
GOBP_PROTEIN_LOCALIZATION_TO_CELL_PERIPHERY	GOBP_PROTEIN_LOCALIZATION_TO_CELL_PERIPHERY	314	0.348944	1.50864	0.0138614	0.108695	1	3195	tags=25%, list=21%, signal=30%
GOBP_REGULATION_OF_CD8_POSITIVE_ALPHA_BETA_T_CELL_ACTIVATION	GOBP_REGULATION_OF_CD8_POSITIVE_ALPHA_BETA_T_CELL_ACTIVATION	16	0.734381	1.50855	0.0454545	0.108684	1	2849	tags=69%, list=19%, signal=84%
GOBP_NEUROTROPHIN_TRK_RECEPTOR_SIGNALING_PATHWAY	GOBP_NEUROTROPHIN_TRK_RECEPTOR_SIGNALING_PATHWAY	23	0.527662	1.50852	0.0374753	0.108601	1	2113	tags=30%, list=14%, signal=35%
GOBP_POSITIVE_REGULATION_OF_CELLULAR_RESPONSE_TO_TRANSFORMING_GROWTH_FACTOR_BETA_STIMULUS	GOBP_POSITIVE_REGULATION_OF_CELLULAR_RESPONSE_TO_TRANSFORMING_GROWTH_FACTOR_BETA_STIMULUS	31	0.527672	1.50849	0.0494845	0.108521	1	1970	tags=23%, list=13%, signal=26%
GOBP_REGULATION_OF_RECEPTOR_MEDIATED_ENDOCYTOSIS	GOBP_REGULATION_OF_RECEPTOR_MEDIATED_ENDOCYTOSIS	105	0.405989	1.5084	0.0136187	0.108495	1	4396	tags=37%, list=29%, signal=52%
GOBP_AMYLOID_FIBRIL_FORMATION	GOBP_AMYLOID_FIBRIL_FORMATION	28	0.462536	1.50835	0.0628803	0.108418	1	3035	tags=36%, list=20%, signal=44%
GOBP_REGULATION_OF_PLATELET_AGGREGATION	GOBP_REGULATION_OF_PLATELET_AGGREGATION	26	0.629256	1.50785	0.026	0.108712	1	3111	tags=54%, list=20%, signal=67%
GOBP_NEGATIVE_REGULATION_OF_TRANSMEMBRANE_RECEPTOR_PROTEIN_SERINE_THREONINE_KINASE_SIGNALING_PATHWAY	GOBP_NEGATIVE_REGULATION_OF_TRANSMEMBRANE_RECEPTOR_PROTEIN_SERINE_THREONINE_KINASE_SIGNALING_PATHWAY	113	0.476534	1.50782	0.0103306	0.108616	1	3417	tags=31%, list=22%, signal=40%
GOBP_POSITIVE_REGULATION_OF_CELLULAR_EXTRAVASATION	GOBP_POSITIVE_REGULATION_OF_CELLULAR_EXTRAVASATION	17	0.628831	1.50681	0.0345528	0.109236	1	2939	tags=47%, list=19%, signal=58%
GOBP_PHOSPHATIDYLSERINE_METABOLIC_PROCESS	GOBP_PHOSPHATIDYLSERINE_METABOLIC_PROCESS	25	0.533399	1.50656	0.0571429	0.109332	1	5155	tags=56%, list=34%, signal=84%
GOBP_POSITIVE_REGULATION_OF_AMYLOID_BETA_FORMATION	GOBP_POSITIVE_REGULATION_OF_AMYLOID_BETA_FORMATION	15	0.576509	1.50601	0.0576541	0.109635	1	3002	tags=40%, list=20%, signal=50%
GOBP_REGULATION_OF_MONOCYTE_CHEMOTAXIS	GOBP_REGULATION_OF_MONOCYTE_CHEMOTAXIS	24	0.658304	1.50529	0.0306122	0.110102	1	2902	tags=63%, list=19%, signal=77%
GOBP_POSITIVE_REGULATION_OF_CELLULAR_CARBOHYDRATE_METABOLIC_PROCESS	GOBP_POSITIVE_REGULATION_OF_CELLULAR_CARBOHYDRATE_METABOLIC_PROCESS	49	0.482893	1.50503	0.026971	0.110191	1	1436	tags=22%, list=9%, signal=25%
GOBP_REGULATION_OF_STRIATED_MUSCLE_CONTRACTION	GOBP_REGULATION_OF_STRIATED_MUSCLE_CONTRACTION	85	0.484914	1.5049	0.0158416	0.110199	1	3676	tags=38%, list=24%, signal=49%
GOBP_POSITIVE_REGULATION_OF_HUMORAL_IMMUNE_RESPONSE	GOBP_POSITIVE_REGULATION_OF_HUMORAL_IMMUNE_RESPONSE	20	0.68337	1.50481	0.0307377	0.110176	1	2249	tags=55%, list=15%, signal=64%
GOBP_3_UTR_MEDIATED_MRNA_DESTABILIZATION	GOBP_3_UTR_MEDIATED_MRNA_DESTABILIZATION	17	0.533665	1.50451	0.0625	0.11027	1	3685	tags=35%, list=24%, signal=46%
GOBP_REGULATION_OF_CELLULAR_RESPONSE_TO_VASCULAR_ENDOTHELIAL_GROWTH_FACTOR_STIMULUS	GOBP_REGULATION_OF_CELLULAR_RESPONSE_TO_VASCULAR_ENDOTHELIAL_GROWTH_FACTOR_STIMULUS	21	0.6059	1.50351	0.02537	0.110939	1	3167	tags=52%, list=21%, signal=66%
GOBP_TEMPERATURE_HOMEOSTASIS	GOBP_TEMPERATURE_HOMEOSTASIS	172	0.440293	1.50336	0.0138889	0.110963	1	2485	tags=27%, list=16%, signal=32%
GOBP_OVULATION_CYCLE	GOBP_OVULATION_CYCLE	69	0.520985	1.50329	0.0181087	0.110908	1	2603	tags=32%, list=17%, signal=38%
GOBP_LYMPHOCYTE_CHEMOTAXIS	GOBP_LYMPHOCYTE_CHEMOTAXIS	45	0.647756	1.50322	0.0248447	0.11084	1	2998	tags=51%, list=20%, signal=63%
GOBP_ARTERY_MORPHOGENESIS	GOBP_ARTERY_MORPHOGENESIS	69	0.507369	1.50318	0.030426	0.110763	1	3440	tags=45%, list=22%, signal=58%
GOBP_PEPTIDE_ANTIGEN_ASSEMBLY_WITH_MHC_PROTEIN_COMPLEX	GOBP_PEPTIDE_ANTIGEN_ASSEMBLY_WITH_MHC_PROTEIN_COMPLEX	15	0.752422	1.50311	0.0245902	0.110711	1	1976	tags=60%, list=13%, signal=69%
GOBP_ANTIGEN_PROCESSING_AND_PRESENTATION_OF_ENDOGENOUS_ANTIGEN	GOBP_ANTIGEN_PROCESSING_AND_PRESENTATION_OF_ENDOGENOUS_ANTIGEN	23	0.668063	1.50304	0.034	0.110664	1	4349	tags=78%, list=28%, signal=109%
GOBP_NEGATIVE_REGULATION_OF_CHEMOKINE_PRODUCTION	GOBP_NEGATIVE_REGULATION_OF_CHEMOKINE_PRODUCTION	20	0.634491	1.50155	0.0426829	0.111669	1	3794	tags=55%, list=25%, signal=73%
GOBP_NEGATIVE_REGULATION_OF_LYASE_ACTIVITY	GOBP_NEGATIVE_REGULATION_OF_LYASE_ACTIVITY	25	0.575795	1.50146	0.0425963	0.111629	1	3612	tags=44%, list=24%, signal=57%
GOBP_REGULATION_OF_VIRAL_GENOME_REPLICATION	GOBP_REGULATION_OF_VIRAL_GENOME_REPLICATION	76	0.44732	1.50146	0.0695296	0.111525	1	4140	tags=37%, list=27%, signal=50%
GOBP_RESPONSE_TO_INTERFERON_BETA	GOBP_RESPONSE_TO_INTERFERON_BETA	27	0.562266	1.50086	0.0888889	0.111921	1	3320	tags=41%, list=22%, signal=52%
GOBP_GLYCEROPHOSPHOLIPID_METABOLIC_PROCESS	GOBP_GLYCEROPHOSPHOLIPID_METABOLIC_PROCESS	277	0.353716	1.50067	0.0160321	0.111977	1	4372	tags=34%, list=28%, signal=47%
GOBP_PLATELET_ACTIVATION	GOBP_PLATELET_ACTIVATION	123	0.498314	1.50055	0.0298211	0.111964	1	3361	tags=42%, list=22%, signal=54%
GOBP_ATRIAL_SEPTUM_DEVELOPMENT	GOBP_ATRIAL_SEPTUM_DEVELOPMENT	21	0.572678	1.50042	0.0512295	0.111971	1	3596	tags=52%, list=23%, signal=68%
GOBP_ISOTYPE_SWITCHING_TO_IGG_ISOTYPES	GOBP_ISOTYPE_SWITCHING_TO_IGG_ISOTYPES	15	0.654195	1.50037	0.0766129	0.111909	1	1996	tags=47%, list=13%, signal=54%
GOBP_CELLULAR_RESPONSE_TO_STEROID_HORMONE_STIMULUS	GOBP_CELLULAR_RESPONSE_TO_STEROID_HORMONE_STIMULUS	180	0.378025	1.49977	0.00992064	0.112314	1	4805	tags=36%, list=31%, signal=52%
GOBP_POSITIVE_REGULATION_OF_OSSIFICATION	GOBP_POSITIVE_REGULATION_OF_OSSIFICATION	47	0.554374	1.49969	0.0180723	0.112261	1	3596	tags=49%, list=23%, signal=64%
GOBP_EPITHELIAL_TUBE_BRANCHING_INVOLVED_IN_LUNG_MORPHOGENESIS	GOBP_EPITHELIAL_TUBE_BRANCHING_INVOLVED_IN_LUNG_MORPHOGENESIS	29	0.599515	1.49908	0.0356347	0.112623	1	2504	tags=45%, list=16%, signal=53%
GOBP_NEGATIVE_REGULATION_OF_BMP_SIGNALING_PATHWAY	GOBP_NEGATIVE_REGULATION_OF_BMP_SIGNALING_PATHWAY	49	0.546459	1.49903	0.0176471	0.112555	1	3977	tags=37%, list=26%, signal=49%
GOBP_REGULATION_OF_B_CELL_RECEPTOR_SIGNALING_PATHWAY	GOBP_REGULATION_OF_B_CELL_RECEPTOR_SIGNALING_PATHWAY	19	0.736165	1.49865	0.0433071	0.112771	1	3104	tags=74%, list=20%, signal=92%
GOBP_POSITIVE_REGULATION_OF_BEHAVIOR	GOBP_POSITIVE_REGULATION_OF_BEHAVIOR	21	0.617642	1.49837	0.0277228	0.11288	1	1490	tags=33%, list=10%, signal=37%
GOBP_ACTIN_FILAMENT_BASED_MOVEMENT	GOBP_ACTIN_FILAMENT_BASED_MOVEMENT	124	0.481318	1.49827	0.0158416	0.112838	1	2617	tags=31%, list=17%, signal=38%
GOBP_REGULATION_OF_CELLULAR_PH	GOBP_REGULATION_OF_CELLULAR_PH	73	0.437262	1.49815	0.0373281	0.112829	1	3629	tags=34%, list=24%, signal=45%
GOBP_REGULATION_OF_PROTEIN_KINASE_A_SIGNALING	GOBP_REGULATION_OF_PROTEIN_KINASE_A_SIGNALING	16	0.64449	1.49807	0.0263692	0.112802	1	2182	tags=38%, list=14%, signal=44%
GOBP_POSITIVE_REGULATION_OF_P38MAPK_CASCADE	GOBP_POSITIVE_REGULATION_OF_P38MAPK_CASCADE	27	0.566556	1.49749	0.0324544	0.113128	1	3385	tags=48%, list=22%, signal=62%
GOBP_REGULATION_OF_NON_CANONICAL_WNT_SIGNALING_PATHWAY	GOBP_REGULATION_OF_NON_CANONICAL_WNT_SIGNALING_PATHWAY	24	0.596688	1.49736	0.0411523	0.113125	1	4859	tags=63%, list=32%, signal=91%
GOBP_BASEMENT_MEMBRANE_ASSEMBLY	GOBP_BASEMENT_MEMBRANE_ASSEMBLY	15	0.61711	1.49664	0.055336	0.113622	1	3322	tags=40%, list=22%, signal=51%
GOBP_FIBROBLAST_MIGRATION	GOBP_FIBROBLAST_MIGRATION	42	0.428821	1.49628	0.0705645	0.113768	1	5763	tags=57%, list=38%, signal=91%
GOBP_ACTIVATION_OF_CYSTEINE_TYPE_ENDOPEPTIDASE_ACTIVITY	GOBP_ACTIVATION_OF_CYSTEINE_TYPE_ENDOPEPTIDASE_ACTIVITY	19	0.511747	1.49628	0.0655106	0.113668	1	3474	tags=37%, list=23%, signal=48%
GOBP_REGULATION_OF_SYSTEMIC_ARTERIAL_BLOOD_PRESSURE	GOBP_REGULATION_OF_SYSTEMIC_ARTERIAL_BLOOD_PRESSURE	90	0.529369	1.49603	0.0100604	0.113781	1	4109	tags=51%, list=27%, signal=69%
GOBP_CARDIAC_EPITHELIAL_TO_MESENCHYMAL_TRANSITION	GOBP_CARDIAC_EPITHELIAL_TO_MESENCHYMAL_TRANSITION	36	0.592603	1.49582	0.0334728	0.113859	1	4729	tags=67%, list=31%, signal=96%
GOBP_NEGATIVE_REGULATION_OF_PROTEIN_BINDING	GOBP_NEGATIVE_REGULATION_OF_PROTEIN_BINDING	88	0.408563	1.49524	0.0160643	0.114219	1	2014	tags=18%, list=13%, signal=21%
GOBP_POSITIVE_REGULATION_OF_EXTRACELLULAR_MATRIX_ORGANIZATION	GOBP_POSITIVE_REGULATION_OF_EXTRACELLULAR_MATRIX_ORGANIZATION	22	0.590423	1.49469	0.0441767	0.114551	1	5376	tags=73%, list=35%, signal=112%
GOBP_REGULATION_OF_PROTEIN_DEPOLYMERIZATION	GOBP_REGULATION_OF_PROTEIN_DEPOLYMERIZATION	77	0.456951	1.49467	0.0329457	0.114469	1	4574	tags=53%, list=30%, signal=75%
GOBP_RESPONSE_TO_TYPE_I_INTERFERON	GOBP_RESPONSE_TO_TYPE_I_INTERFERON	58	0.447521	1.49438	0.107724	0.114548	1	3441	tags=31%, list=22%, signal=40%
GOBP_HEAT_GENERATION	GOBP_HEAT_GENERATION	16	0.704195	1.49403	0.0277778	0.114734	1	2355	tags=75%, list=15%, signal=88%
GOBP_STEROID_HORMONE_MEDIATED_SIGNALING_PATHWAY	GOBP_STEROID_HORMONE_MEDIATED_SIGNALING_PATHWAY	122	0.386428	1.49373	0.0163265	0.114866	1	5057	tags=38%, list=33%, signal=56%
GOBP_CELL_PROJECTION_ASSEMBLY	GOBP_CELL_PROJECTION_ASSEMBLY	494	0.399401	1.49344	0.0410959	0.114981	1	4875	tags=41%, list=32%, signal=59%
GOBP_BENZENE_CONTAINING_COMPOUND_METABOLIC_PROCESS	GOBP_BENZENE_CONTAINING_COMPOUND_METABOLIC_PROCESS	22	0.629814	1.49273	0.0407332	0.11543	1	3952	tags=73%, list=26%, signal=98%
GOBP_POSITIVE_REGULATION_OF_RHO_PROTEIN_SIGNAL_TRANSDUCTION	GOBP_POSITIVE_REGULATION_OF_RHO_PROTEIN_SIGNAL_TRANSDUCTION	31	0.587946	1.49267	0.0529412	0.115368	1	3361	tags=58%, list=22%, signal=74%
GOBP_RESPONSE_TO_STEROID_HORMONE	GOBP_RESPONSE_TO_STEROID_HORMONE	300	0.406765	1.49243	0.00406504	0.11542	1	2910	tags=23%, list=19%, signal=28%
GOBP_POSITIVE_REGULATION_OF_CATION_CHANNEL_ACTIVITY	GOBP_POSITIVE_REGULATION_OF_CATION_CHANNEL_ACTIVITY	61	0.52616	1.49238	0.0112782	0.115367	1	2995	tags=48%, list=20%, signal=59%
GOBP_RHYTHMIC_BEHAVIOR	GOBP_RHYTHMIC_BEHAVIOR	39	0.512165	1.49233	0.0308008	0.115287	1	1611	tags=26%, list=10%, signal=29%
GOBP_GOLGI_TO_ENDOSOME_TRANSPORT	GOBP_GOLGI_TO_ENDOSOME_TRANSPORT	15	0.455244	1.49188	0.0718563	0.115545	1	5964	tags=60%, list=39%, signal=98%
GOBP_POSITIVE_REGULATION_OF_MACROPHAGE_DERIVED_FOAM_CELL_DIFFERENTIATION	GOBP_POSITIVE_REGULATION_OF_MACROPHAGE_DERIVED_FOAM_CELL_DIFFERENTIATION	18	0.728851	1.49084	0.0223577	0.116321	1	3091	tags=72%, list=20%, signal=90%
GOBP_HEART_GROWTH	GOBP_HEART_GROWTH	74	0.499823	1.49065	0.0188285	0.116383	1	4187	tags=49%, list=27%, signal=67%
GOBP_MAINTENANCE_OF_BLOOD_BRAIN_BARRIER	GOBP_MAINTENANCE_OF_BLOOD_BRAIN_BARRIER	35	0.566226	1.49064	0.0476191	0.116276	1	2944	tags=43%, list=19%, signal=53%
GOBP_RESPONSE_TO_OXIDATIVE_STRESS	GOBP_RESPONSE_TO_OXIDATIVE_STRESS	385	0.346611	1.49061	0.013834	0.1162	1	3528	tags=26%, list=23%, signal=33%
GOBP_GLOMERULAR_EPITHELIAL_CELL_DIFFERENTIATION	GOBP_GLOMERULAR_EPITHELIAL_CELL_DIFFERENTIATION	22	0.592205	1.49053	0.0277778	0.11615	1	3419	tags=50%, list=22%, signal=64%
GOBP_REGULATED_EXOCYTOSIS	GOBP_REGULATED_EXOCYTOSIS	215	0.44902	1.48995	0.0135922	0.116507	1	3118	tags=33%, list=20%, signal=41%
GOBP_NEGATIVE_REGULATION_OF_NUCLEOCYTOPLASMIC_TRANSPORT	GOBP_NEGATIVE_REGULATION_OF_NUCLEOCYTOPLASMIC_TRANSPORT	21	0.505948	1.48967	0.0550098	0.116607	1	3357	tags=33%, list=22%, signal=43%
GOBP_NEGATIVE_REGULATION_OF_FIBROBLAST_PROLIFERATION	GOBP_NEGATIVE_REGULATION_OF_FIBROBLAST_PROLIFERATION	27	0.441415	1.48957	0.0690335	0.116572	1	4710	tags=41%, list=31%, signal=59%
GOBP_NEGATIVE_REGULATION_OF_CELL_MIGRATION_INVOLVED_IN_SPROUTING_ANGIOGENESIS	GOBP_NEGATIVE_REGULATION_OF_CELL_MIGRATION_INVOLVED_IN_SPROUTING_ANGIOGENESIS	15	0.590406	1.48927	0.089613	0.116752	1	2732	tags=33%, list=18%, signal=41%
GOBP_NEURON_CELLULAR_HOMEOSTASIS	GOBP_NEURON_CELLULAR_HOMEOSTASIS	31	0.562657	1.48918	0.0161616	0.116716	1	3147	tags=39%, list=20%, signal=49%
GOBP_NEGATIVE_REGULATION_OF_ADENYLATE_CYCLASE_ACTIVITY	GOBP_NEGATIVE_REGULATION_OF_ADENYLATE_CYCLASE_ACTIVITY	20	0.600265	1.48896	0.0382294	0.116772	1	2736	tags=40%, list=18%, signal=49%
GOBP_RIBONUCLEOSIDE_CATABOLIC_PROCESS	GOBP_RIBONUCLEOSIDE_CATABOLIC_PROCESS	17	0.630642	1.48884	0.052	0.116766	1	4004	tags=59%, list=26%, signal=79%
GOBP_DENDRITIC_SPINE_MAINTENANCE	GOBP_DENDRITIC_SPINE_MAINTENANCE	17	0.570126	1.48882	0.0688976	0.116674	1	2083	tags=35%, list=14%, signal=41%
GOBP_RECEPTOR_INTERNALIZATION	GOBP_RECEPTOR_INTERNALIZATION	106	0.445971	1.48844	0.0262097	0.11686	1	5022	tags=46%, list=33%, signal=68%
GOBP_PLATELET_AGGREGATION	GOBP_PLATELET_AGGREGATION	66	0.531969	1.48753	0.0350195	0.117488	1	3111	tags=44%, list=20%, signal=55%
GOBP_CELLULAR_COMPONENT_DISASSEMBLY	GOBP_CELLULAR_COMPONENT_DISASSEMBLY	414	0.316059	1.4873	0.0173745	0.117569	1	4590	tags=30%, list=30%, signal=41%
GOBP_POSITIVE_REGULATION_OF_AXONOGENESIS	GOBP_POSITIVE_REGULATION_OF_AXONOGENESIS	72	0.471906	1.4873	0.0248566	0.117463	1	3680	tags=38%, list=24%, signal=49%
GOBP_CELLULAR_POLYSACCHARIDE_CATABOLIC_PROCESS	GOBP_CELLULAR_POLYSACCHARIDE_CATABOLIC_PROCESS	16	0.524905	1.48722	0.0578158	0.117424	1	3286	tags=31%, list=21%, signal=40%
GOBP_NEGATIVE_REGULATION_OF_SECRETION	GOBP_NEGATIVE_REGULATION_OF_SECRETION	143	0.452041	1.48714	0.00982318	0.117385	1	2927	tags=29%, list=19%, signal=35%
GOBP_HETEROTYPIC_CELL_CELL_ADHESION	GOBP_HETEROTYPIC_CELL_CELL_ADHESION	59	0.546346	1.48699	0.0501931	0.117399	1	3535	tags=56%, list=23%, signal=72%
GOBP_DOPAMINE_METABOLIC_PROCESS	GOBP_DOPAMINE_METABOLIC_PROCESS	38	0.531551	1.4866	0.0423387	0.117631	1	2972	tags=37%, list=19%, signal=46%
GOBP_TRACHEA_DEVELOPMENT	GOBP_TRACHEA_DEVELOPMENT	18	0.634817	1.48612	0.0398406	0.11788	1	2760	tags=39%, list=18%, signal=47%
GOBP_NEGATIVE_REGULATION_OF_B_CELL_PROLIFERATION	GOBP_NEGATIVE_REGULATION_OF_B_CELL_PROLIFERATION	17	0.664944	1.48489	0.0711382	0.11873	1	3737	tags=71%, list=24%, signal=93%
GOBP_POSITIVE_REGULATION_OF_REACTIVE_OXYGEN_SPECIES_METABOLIC_PROCESS	GOBP_POSITIVE_REGULATION_OF_REACTIVE_OXYGEN_SPECIES_METABOLIC_PROCESS	62	0.510695	1.48476	0.0507099	0.118711	1	3845	tags=48%, list=25%, signal=64%
GOBP_DEVELOPMENTAL_PIGMENTATION	GOBP_DEVELOPMENTAL_PIGMENTATION	43	0.500093	1.48435	0.0280561	0.118904	1	2762	tags=33%, list=18%, signal=40%
GOBP_REGULATION_OF_LAMELLIPODIUM_ASSEMBLY	GOBP_REGULATION_OF_LAMELLIPODIUM_ASSEMBLY	36	0.459841	1.48416	0.0358566	0.118961	1	3794	tags=36%, list=25%, signal=48%
GOBP_REGULATION_OF_CARDIAC_MUSCLE_CONTRACTION	GOBP_REGULATION_OF_CARDIAC_MUSCLE_CONTRACTION	69	0.484777	1.48378	0.028169	0.119143	1	3676	tags=39%, list=24%, signal=51%
GOBP_REGULATION_OF_PROTEIN_LOCALIZATION_TO_MEMBRANE	GOBP_REGULATION_OF_PROTEIN_LOCALIZATION_TO_MEMBRANE	150	0.375009	1.48336	0.015534	0.119351	1	3186	tags=27%, list=21%, signal=34%
GOBP_REGULATION_OF_MEMBRANE_DEPOLARIZATION	GOBP_REGULATION_OF_MEMBRANE_DEPOLARIZATION	43	0.502895	1.48333	0.0141988	0.119269	1	3717	tags=47%, list=24%, signal=61%
GOBP_NEGATIVE_REGULATION_OF_INTRACELLULAR_TRANSPORT	GOBP_NEGATIVE_REGULATION_OF_INTRACELLULAR_TRANSPORT	52	0.438028	1.48332	0.0397614	0.11917	1	2810	tags=21%, list=18%, signal=26%
GOBP_ACTIN_NUCLEATION	GOBP_ACTIN_NUCLEATION	44	0.415915	1.48319	0.0545809	0.119179	1	2739	tags=25%, list=18%, signal=30%
GOBP_REGULATION_OF_SMAD_PROTEIN_SIGNAL_TRANSDUCTION	GOBP_REGULATION_OF_SMAD_PROTEIN_SIGNAL_TRANSDUCTION	30	0.518853	1.4831	0.038961	0.119152	1	3409	tags=43%, list=22%, signal=56%
GOBP_MUSCLE_ORGAN_DEVELOPMENT	GOBP_MUSCLE_ORGAN_DEVELOPMENT	295	0.443076	1.48271	0.012024	0.11939	1	3480	tags=34%, list=23%, signal=43%
GOBP_MEMBRANE_DEPOLARIZATION_DURING_ACTION_POTENTIAL	GOBP_MEMBRANE_DEPOLARIZATION_DURING_ACTION_POTENTIAL	35	0.647424	1.48246	0.0246407	0.119515	1	1440	tags=34%, list=9%, signal=38%
GOBP_LYMPHANGIOGENESIS	GOBP_LYMPHANGIOGENESIS	17	0.663135	1.48238	0.0477178	0.119458	1	3850	tags=65%, list=25%, signal=86%
GOBP_NEGATIVE_REGULATION_OF_INTRACELLULAR_PROTEIN_TRANSPORT	GOBP_NEGATIVE_REGULATION_OF_INTRACELLULAR_PROTEIN_TRANSPORT	39	0.446617	1.48203	0.0355731	0.119639	1	2810	tags=21%, list=18%, signal=25%
GOBP_REGULATION_OF_ALCOHOL_BIOSYNTHETIC_PROCESS	GOBP_REGULATION_OF_ALCOHOL_BIOSYNTHETIC_PROCESS	47	0.506912	1.48197	0.025641	0.119575	1	1541	tags=26%, list=10%, signal=28%
GOBP_PHOSPHATIDYLCHOLINE_METABOLIC_PROCESS	GOBP_PHOSPHATIDYLCHOLINE_METABOLIC_PROCESS	67	0.485726	1.48081	0.0290135	0.120408	1	3259	tags=40%, list=21%, signal=51%
GOBP_NEGATIVE_REGULATION_OF_MYELOID_CELL_DIFFERENTIATION	GOBP_NEGATIVE_REGULATION_OF_MYELOID_CELL_DIFFERENTIATION	72	0.462597	1.48065	0.0403226	0.120423	1	3806	tags=42%, list=25%, signal=55%
GOBP_PHARYNGEAL_SYSTEM_DEVELOPMENT	GOBP_PHARYNGEAL_SYSTEM_DEVELOPMENT	26	0.602615	1.48059	0.034413	0.120357	1	3596	tags=50%, list=23%, signal=65%
GOBP_REGULATION_OF_GLUCOSE_TRANSMEMBRANE_TRANSPORT	GOBP_REGULATION_OF_GLUCOSE_TRANSMEMBRANE_TRANSPORT	67	0.45821	1.48054	0.0227273	0.120294	1	3259	tags=33%, list=21%, signal=41%
GOBP_POSITIVE_REGULATION_OF_INTRACELLULAR_PROTEIN_TRANSPORT	GOBP_POSITIVE_REGULATION_OF_INTRACELLULAR_PROTEIN_TRANSPORT	137	0.307785	1.48026	0.0388548	0.120393	1	3568	tags=23%, list=23%, signal=29%
GOBP_CARDIAC_MUSCLE_TISSUE_DEVELOPMENT	GOBP_CARDIAC_MUSCLE_TISSUE_DEVELOPMENT	205	0.459912	1.47931	0.0181818	0.121108	1	3627	tags=39%, list=24%, signal=50%
GOBP_T_HELPER_17_CELL_DIFFERENTIATION	GOBP_T_HELPER_17_CELL_DIFFERENTIATION	27	0.621508	1.47926	0.0629921	0.121047	1	3090	tags=52%, list=20%, signal=65%
GOBP_MYELOID_DENDRITIC_CELL_DIFFERENTIATION	GOBP_MYELOID_DENDRITIC_CELL_DIFFERENTIATION	17	0.641945	1.47917	0.033264	0.121036	1	2304	tags=41%, list=15%, signal=48%
GOBP_SOMATIC_DIVERSIFICATION_OF_IMMUNOGLOBULINS_INVOLVED_IN_IMMUNE_RESPONSE	GOBP_SOMATIC_DIVERSIFICATION_OF_IMMUNOGLOBULINS_INVOLVED_IN_IMMUNE_RESPONSE	44	0.505589	1.4782	0.0724638	0.121793	1	2538	tags=30%, list=17%, signal=35%
GOBP_SPHINGOLIPID_MEDIATED_SIGNALING_PATHWAY	GOBP_SPHINGOLIPID_MEDIATED_SIGNALING_PATHWAY	16	0.588125	1.47784	0.056338	0.12195	1	2749	tags=31%, list=18%, signal=38%
GOBP_RESPONSE_TO_INTERLEUKIN_1	GOBP_RESPONSE_TO_INTERLEUKIN_1	113	0.512154	1.47754	0.042	0.122069	1	3098	tags=41%, list=20%, signal=51%
GOBP_REGULATION_OF_JUN_KINASE_ACTIVITY	GOBP_REGULATION_OF_JUN_KINASE_ACTIVITY	59	0.461245	1.47732	0.0378486	0.12215	1	3087	tags=31%, list=20%, signal=38%
GOBP_POSITIVE_REGULATION_OF_CARBOHYDRATE_METABOLIC_PROCESS	GOBP_POSITIVE_REGULATION_OF_CARBOHYDRATE_METABOLIC_PROCESS	69	0.469758	1.47727	0.020284	0.122079	1	1436	tags=23%, list=9%, signal=25%
GOBP_REGULATION_OF_PROTEIN_EXPORT_FROM_NUCLEUS	GOBP_REGULATION_OF_PROTEIN_EXPORT_FROM_NUCLEUS	31	0.387157	1.47661	0.0770791	0.122495	1	3772	tags=26%, list=25%, signal=34%
GOBP_ENSHEATHMENT_OF_NEURONS	GOBP_ENSHEATHMENT_OF_NEURONS	130	0.451669	1.47614	0.0326296	0.12278	1	2364	tags=28%, list=15%, signal=32%
GOBP_NATURAL_KILLER_CELL_MEDIATED_IMMUNITY	GOBP_NATURAL_KILLER_CELL_MEDIATED_IMMUNITY	62	0.604419	1.47614	0.0755814	0.122674	1	4029	tags=60%, list=26%, signal=81%
GOBP_NEURON_DEATH	GOBP_NEURON_DEATH	317	0.377228	1.47609	0.00379507	0.122613	1	3474	tags=30%, list=23%, signal=38%
GOBP_REGULATION_OF_STEROL_TRANSPORT	GOBP_REGULATION_OF_STEROL_TRANSPORT	61	0.496556	1.47582	0.0217391	0.122744	1	4501	tags=49%, list=29%, signal=69%
GOBP_HYPEROSMOTIC_RESPONSE	GOBP_HYPEROSMOTIC_RESPONSE	25	0.501787	1.47568	0.0286885	0.12274	1	1145	tags=20%, list=7%, signal=22%
GOBP_SEQUESTERING_OF_TRIGLYCERIDE	GOBP_SEQUESTERING_OF_TRIGLYCERIDE	17	0.611168	1.4754	0.0580913	0.122888	1	2064	tags=35%, list=13%, signal=41%
GOBP_NEGATIVE_REGULATION_OF_INTERLEUKIN_12_PRODUCTION	GOBP_NEGATIVE_REGULATION_OF_INTERLEUKIN_12_PRODUCTION	18	0.74472	1.47405	0.0600414	0.12395	1	2783	tags=78%, list=18%, signal=95%
GOBP_CELLULAR_RESPONSE_TO_INTERLEUKIN_1	GOBP_CELLULAR_RESPONSE_TO_INTERLEUKIN_1	90	0.52626	1.47401	0.0413386	0.12388	1	3098	tags=43%, list=20%, signal=54%
GOBP_POSITIVE_REGULATION_OF_COLD_INDUCED_THERMOGENESIS	GOBP_POSITIVE_REGULATION_OF_COLD_INDUCED_THERMOGENESIS	96	0.452853	1.47285	0.0214844	0.12477	1	2018	tags=24%, list=13%, signal=27%
GOBP_MODULATION_OF_PROCESS_OF_ANOTHER_ORGANISM	GOBP_MODULATION_OF_PROCESS_OF_ANOTHER_ORGANISM	22	0.66501	1.47226	0.027833	0.125174	1	3031	tags=55%, list=20%, signal=68%
GOBP_DEFENSE_RESPONSE_TO_BACTERIUM	GOBP_DEFENSE_RESPONSE_TO_BACTERIUM	230	0.496826	1.47209	0.0120724	0.125206	1	4135	tags=50%, list=27%, signal=67%
GOBP_AUTOPHAGOSOME_MATURATION	GOBP_AUTOPHAGOSOME_MATURATION	52	0.292916	1.47178	0.0649895	0.125325	1	122	tags=4%, list=1%, signal=4%
GOBP_POSITIVE_REGULATION_OF_RECEPTOR_SIGNALING_PATHWAY_VIA_STAT	GOBP_POSITIVE_REGULATION_OF_RECEPTOR_SIGNALING_PATHWAY_VIA_STAT	44	0.545335	1.47144	0.0377734	0.125539	1	4308	tags=57%, list=28%, signal=79%
GOBP_MELANOCYTE_DIFFERENTIATION	GOBP_MELANOCYTE_DIFFERENTIATION	23	0.612276	1.47136	0.0260521	0.125491	1	2466	tags=48%, list=16%, signal=57%
GOBP_GLIAL_CELL_PROLIFERATION	GOBP_GLIAL_CELL_PROLIFERATION	38	0.518763	1.4711	0.037182	0.125583	1	2754	tags=39%, list=18%, signal=48%
GOBP_EXPORT_ACROSS_PLASMA_MEMBRANE	GOBP_EXPORT_ACROSS_PLASMA_MEMBRANE	57	0.542562	1.4708	0.0483559	0.125774	1	2341	tags=33%, list=15%, signal=39%
GOBP_CYTOPLASMIC_PATTERN_RECOGNITION_RECEPTOR_SIGNALING_PATHWAY_IN_RESPONSE_TO_VIRUS	GOBP_CYTOPLASMIC_PATTERN_RECOGNITION_RECEPTOR_SIGNALING_PATHWAY_IN_RESPONSE_TO_VIRUS	29	0.462727	1.47046	0.115063	0.125942	1	3900	tags=34%, list=25%, signal=46%
GOBP_MUSCLE_CELL_APOPTOTIC_PROCESS	GOBP_MUSCLE_CELL_APOPTOTIC_PROCESS	64	0.445292	1.46974	0.0182927	0.126468	1	2585	tags=28%, list=17%, signal=34%
GOBP_NEURON_MATURATION	GOBP_NEURON_MATURATION	44	0.523358	1.46961	0.0362173	0.126467	1	2249	tags=30%, list=15%, signal=35%
GOBP_REGULATION_OF_FIBROBLAST_GROWTH_FACTOR_RECEPTOR_SIGNALING_PATHWAY	GOBP_REGULATION_OF_FIBROBLAST_GROWTH_FACTOR_RECEPTOR_SIGNALING_PATHWAY	30	0.566322	1.46936	0.052	0.12657	1	3275	tags=37%, list=21%, signal=47%
GOBP_ANIMAL_ORGAN_REGENERATION	GOBP_ANIMAL_ORGAN_REGENERATION	64	0.485065	1.46916	0.0268041	0.126613	1	2688	tags=36%, list=18%, signal=43%
GOBP_HUMORAL_IMMUNE_RESPONSE_MEDIATED_BY_CIRCULATING_IMMUNOGLOBULIN	GOBP_HUMORAL_IMMUNE_RESPONSE_MEDIATED_BY_CIRCULATING_IMMUNOGLOBULIN	45	0.600244	1.46899	0.0286299	0.126627	1	3252	tags=60%, list=21%, signal=76%
GOBP_REGULATION_OF_EPITHELIAL_CELL_APOPTOTIC_PROCESS	GOBP_REGULATION_OF_EPITHELIAL_CELL_APOPTOTIC_PROCESS	78	0.496597	1.46883	0.0385396	0.126663	1	3189	tags=41%, list=21%, signal=52%
GOBP_SUBSTRATE_ADHESION_DEPENDENT_CELL_SPREADING	GOBP_SUBSTRATE_ADHESION_DEPENDENT_CELL_SPREADING	104	0.423415	1.46844	0.0375494	0.126866	1	4236	tags=42%, list=28%, signal=58%
GOBP_REGULATION_OF_CANONICAL_WNT_SIGNALING_PATHWAY	GOBP_REGULATION_OF_CANONICAL_WNT_SIGNALING_PATHWAY	226	0.411892	1.46844	0.029106	0.126759	1	4479	tags=39%, list=29%, signal=55%
GOBP_RESPONSE_TO_HYDROGEN_PEROXIDE	GOBP_RESPONSE_TO_HYDROGEN_PEROXIDE	108	0.391819	1.46811	0.0440882	0.126948	1	2716	tags=25%, list=18%, signal=30%
GOBP_REGULATION_OF_PROTEIN_CATABOLIC_PROCESS	GOBP_REGULATION_OF_PROTEIN_CATABOLIC_PROCESS	357	0.281366	1.46744	0.01417	0.127417	1	4015	tags=25%, list=26%, signal=33%
GOBP_MULTICELLULAR_ORGANISMAL_HOMEOSTASIS	GOBP_MULTICELLULAR_ORGANISMAL_HOMEOSTASIS	490	0.416162	1.46731	0	0.127422	1	3363	tags=31%, list=22%, signal=38%
GOBP_REGULATION_OF_SYSTEMIC_ARTERIAL_BLOOD_PRESSURE_BY_CIRCULATORY_RENIN_ANGIOTENSIN	GOBP_REGULATION_OF_SYSTEMIC_ARTERIAL_BLOOD_PRESSURE_BY_CIRCULATORY_RENIN_ANGIOTENSIN	16	0.74541	1.46683	0.0207469	0.127707	1	1012	tags=50%, list=7%, signal=53%
GOBP_NEGATIVE_REGULATION_OF_MIRNA_TRANSCRIPTION	GOBP_NEGATIVE_REGULATION_OF_MIRNA_TRANSCRIPTION	17	0.592144	1.46677	0.0565657	0.127665	1	3486	tags=41%, list=23%, signal=53%
GOBP_REGULATION_OF_NUCLEOCYTOPLASMIC_TRANSPORT	GOBP_REGULATION_OF_NUCLEOCYTOPLASMIC_TRANSPORT	100	0.336728	1.46643	0.0416667	0.127843	1	3556	tags=26%, list=23%, signal=34%
GOBP_REGULATION_OF_CELLULAR_CARBOHYDRATE_METABOLIC_PROCESS	GOBP_REGULATION_OF_CELLULAR_CARBOHYDRATE_METABOLIC_PROCESS	130	0.372146	1.46629	0.0161943	0.127852	1	3785	tags=26%, list=25%, signal=34%
GOBP_RESPONSE_TO_CORTICOSTEROID	GOBP_RESPONSE_TO_CORTICOSTEROID	145	0.454794	1.46626	0.0200401	0.127763	1	2699	tags=28%, list=18%, signal=34%
GOBP_PROTEIN_LOCALIZATION_TO_CILIUM	GOBP_PROTEIN_LOCALIZATION_TO_CILIUM	63	0.453587	1.46604	0.112016	0.127823	1	5446	tags=46%, list=35%, signal=71%
GOBP_BIOMINERALIZATION	GOBP_BIOMINERALIZATION	152	0.473839	1.46544	0.0102459	0.128272	1	3602	tags=37%, list=23%, signal=48%
GOBP_NEGATIVE_REGULATION_OF_SMOOTH_MUSCLE_CELL_MIGRATION	GOBP_NEGATIVE_REGULATION_OF_SMOOTH_MUSCLE_CELL_MIGRATION	23	0.556844	1.46534	0.0708661	0.128245	1	4534	tags=48%, list=30%, signal=68%
GOBP_POSITIVE_REGULATION_OF_CALCIUM_ION_TRANSMEMBRANE_TRANSPORTER_ACTIVITY	GOBP_POSITIVE_REGULATION_OF_CALCIUM_ION_TRANSMEMBRANE_TRANSPORTER_ACTIVITY	32	0.557957	1.46522	0.040568	0.128236	1	3397	tags=47%, list=22%, signal=60%
GOBP_CARDIAC_MUSCLE_CONTRACTION	GOBP_CARDIAC_MUSCLE_CONTRACTION	124	0.478731	1.46521	0.0201207	0.128134	1	3717	tags=40%, list=24%, signal=52%
GOBP_MACROPHAGE_DIFFERENTIATION	GOBP_MACROPHAGE_DIFFERENTIATION	44	0.511508	1.4652	0.0554415	0.128039	1	4368	tags=61%, list=28%, signal=86%
GOBP_NEGATIVE_REGULATION_OF_RHO_PROTEIN_SIGNAL_TRANSDUCTION	GOBP_NEGATIVE_REGULATION_OF_RHO_PROTEIN_SIGNAL_TRANSDUCTION	21	0.53794	1.46506	0.0946502	0.128067	1	4236	tags=48%, list=28%, signal=66%
GOBP_NEGATIVE_REGULATION_OF_INTERLEUKIN_8_PRODUCTION	GOBP_NEGATIVE_REGULATION_OF_INTERLEUKIN_8_PRODUCTION	16	0.630924	1.46502	0.0662393	0.128	1	1649	tags=44%, list=11%, signal=49%
GOBP_LONG_TERM_MEMORY	GOBP_LONG_TERM_MEMORY	35	0.547384	1.46445	0.0326531	0.128418	1	3617	tags=46%, list=24%, signal=60%
GOBP_REGULATION_OF_HEART_CONTRACTION	GOBP_REGULATION_OF_HEART_CONTRACTION	188	0.478156	1.4644	0.0137795	0.128348	1	3717	tags=40%, list=24%, signal=53%
GOBP_HEART_MORPHOGENESIS	GOBP_HEART_MORPHOGENESIS	238	0.442614	1.46426	0.0284553	0.128355	1	3851	tags=40%, list=25%, signal=52%
GOBP_NEGATIVE_REGULATION_OF_PHOSPHOPROTEIN_PHOSPHATASE_ACTIVITY	GOBP_NEGATIVE_REGULATION_OF_PHOSPHOPROTEIN_PHOSPHATASE_ACTIVITY	23	0.521553	1.46388	0.0504854	0.128559	1	3207	tags=35%, list=21%, signal=44%
GOBP_NEGATIVE_REGULATION_OF_ORGAN_GROWTH	GOBP_NEGATIVE_REGULATION_OF_ORGAN_GROWTH	29	0.505693	1.46386	0.0450098	0.128463	1	4187	tags=55%, list=27%, signal=76%
GOBP_G_PROTEIN_COUPLED_RECEPTOR_SIGNALING_PATHWAY_COUPLED_TO_CYCLIC_NUCLEOTIDE_SECOND_MESSENGER	GOBP_G_PROTEIN_COUPLED_RECEPTOR_SIGNALING_PATHWAY_COUPLED_TO_CYCLIC_NUCLEOTIDE_SECOND_MESSENGER	56	0.507952	1.46344	0.00588235	0.128715	1	2089	tags=29%, list=14%, signal=33%
GOBP_REGULATION_OF_LAMELLIPODIUM_ORGANIZATION	GOBP_REGULATION_OF_LAMELLIPODIUM_ORGANIZATION	46	0.42216	1.4632	0.0410959	0.128828	1	4236	tags=41%, list=28%, signal=57%
GOBP_REGULATION_OF_SYSTEMIC_ARTERIAL_BLOOD_PRESSURE_BY_HORMONE	GOBP_REGULATION_OF_SYSTEMIC_ARTERIAL_BLOOD_PRESSURE_BY_HORMONE	37	0.617895	1.46312	0.024	0.128789	1	3959	tags=54%, list=26%, signal=73%
GOBP_NEGATIVE_REGULATION_OF_CALCIUM_ION_TRANSPORT	GOBP_NEGATIVE_REGULATION_OF_CALCIUM_ION_TRANSPORT	53	0.509667	1.4622	0.0487288	0.129479	1	3269	tags=36%, list=21%, signal=45%
GOBP_BASE_CONVERSION_OR_SUBSTITUTION_EDITING	GOBP_BASE_CONVERSION_OR_SUBSTITUTION_EDITING	18	0.58275	1.46151	0.0578512	0.129962	1	4004	tags=44%, list=26%, signal=60%
GOBP_REGULATION_OF_EXTRINSIC_APOPTOTIC_SIGNALING_PATHWAY	GOBP_REGULATION_OF_EXTRINSIC_APOPTOTIC_SIGNALING_PATHWAY	143	0.410971	1.46151	0.0383065	0.129859	1	1992	tags=20%, list=13%, signal=23%
GOBP_PHOSPHATE_ION_TRANSMEMBRANE_TRANSPORT	GOBP_PHOSPHATE_ION_TRANSMEMBRANE_TRANSPORT	16	0.54605	1.46097	0.0813187	0.130237	1	682	tags=13%, list=4%, signal=13%
GOBP_NECROTIC_CELL_DEATH	GOBP_NECROTIC_CELL_DEATH	53	0.400458	1.4609	0.0614203	0.13018	1	4525	tags=40%, list=29%, signal=56%
GOBP_POSITIVE_REGULATION_OF_MAST_CELL_ACTIVATION	GOBP_POSITIVE_REGULATION_OF_MAST_CELL_ACTIVATION	20	0.608272	1.46067	0.0378151	0.130253	1	3393	tags=50%, list=22%, signal=64%
GOBP_POSITIVE_REGULATION_OF_REACTIVE_OXYGEN_SPECIES_BIOSYNTHETIC_PROCESS	GOBP_POSITIVE_REGULATION_OF_REACTIVE_OXYGEN_SPECIES_BIOSYNTHETIC_PROCESS	15	0.632545	1.45965	0.0764463	0.131022	1	3845	tags=53%, list=25%, signal=71%
GOBP_INNATE_IMMUNE_RESPONSE_ACTIVATING_SIGNAL_TRANSDUCTION	GOBP_INNATE_IMMUNE_RESPONSE_ACTIVATING_SIGNAL_TRANSDUCTION	23	0.606588	1.45943	0.0792683	0.131115	1	2787	tags=43%, list=18%, signal=53%
GOBP_NEGATIVE_REGULATION_OF_CYTOSKELETON_ORGANIZATION	GOBP_NEGATIVE_REGULATION_OF_CYTOSKELETON_ORGANIZATION	141	0.399232	1.45911	0.0379242	0.131284	1	3665	tags=36%, list=24%, signal=47%
GOBP_REGULATION_OF_NATURAL_KILLER_CELL_MEDIATED_IMMUNITY	GOBP_REGULATION_OF_NATURAL_KILLER_CELL_MEDIATED_IMMUNITY	39	0.670631	1.4588	0.0736434	0.131425	1	2849	tags=59%, list=19%, signal=72%
GOBP_NEGATIVE_REGULATION_OF_CANONICAL_WNT_SIGNALING_PATHWAY	GOBP_NEGATIVE_REGULATION_OF_CANONICAL_WNT_SIGNALING_PATHWAY	123	0.452137	1.45863	0.0343434	0.131456	1	3912	tags=37%, list=25%, signal=50%
GOBP_REGULATION_OF_SYSTEMIC_ARTERIAL_BLOOD_PRESSURE_BY_RENIN_ANGIOTENSIN	GOBP_REGULATION_OF_SYSTEMIC_ARTERIAL_BLOOD_PRESSURE_BY_RENIN_ANGIOTENSIN	24	0.692169	1.45801	0.0302419	0.131911	1	1988	tags=46%, list=13%, signal=53%
GOBP_NEGATIVE_REGULATION_OF_B_CELL_ACTIVATION	GOBP_NEGATIVE_REGULATION_OF_B_CELL_ACTIVATION	34	0.571219	1.458	0.0997963	0.131806	1	3282	tags=62%, list=21%, signal=78%
GOBP_BONE_MINERALIZATION	GOBP_BONE_MINERALIZATION	108	0.508574	1.45773	0.022541	0.131955	1	3602	tags=44%, list=23%, signal=58%
GOBP_CELLULAR_RESPONSE_TO_FLUID_SHEAR_STRESS	GOBP_CELLULAR_RESPONSE_TO_FLUID_SHEAR_STRESS	19	0.599051	1.45773	0.0779221	0.13185	1	4534	tags=63%, list=30%, signal=90%
GOBP_NEGATIVE_REGULATION_OF_CALCIUM_ION_TRANSMEMBRANE_TRANSPORT	GOBP_NEGATIVE_REGULATION_OF_CALCIUM_ION_TRANSMEMBRANE_TRANSPORT	34	0.543615	1.45771	0.0532787	0.131751	1	1711	tags=24%, list=11%, signal=26%
GOBP_SIGNALING_RECEPTOR_LIGAND_PRECURSOR_PROCESSING	GOBP_SIGNALING_RECEPTOR_LIGAND_PRECURSOR_PROCESSING	33	0.568437	1.45762	0.0423387	0.131723	1	2211	tags=36%, list=14%, signal=42%
GOBP_POSITIVE_REGULATION_OF_T_HELPER_1_TYPE_IMMUNE_RESPONSE	GOBP_POSITIVE_REGULATION_OF_T_HELPER_1_TYPE_IMMUNE_RESPONSE	18	0.6847	1.45757	0.0530452	0.131649	1	1916	tags=61%, list=12%, signal=70%
GOBP_CARDIAC_CHAMBER_MORPHOGENESIS	GOBP_CARDIAC_CHAMBER_MORPHOGENESIS	121	0.472709	1.45754	0.033195	0.131554	1	3440	tags=43%, list=22%, signal=55%
GOBP_REGULATION_OF_ACTIN_FILAMENT_BASED_MOVEMENT	GOBP_REGULATION_OF_ACTIN_FILAMENT_BASED_MOVEMENT	39	0.521122	1.45609	0.0383838	0.132699	1	2394	tags=36%, list=16%, signal=42%
GOBP_POST_GOLGI_VESICLE_MEDIATED_TRANSPORT	GOBP_POST_GOLGI_VESICLE_MEDIATED_TRANSPORT	97	0.283514	1.45587	0.083682	0.132808	1	4989	tags=33%, list=32%, signal=49%
GOBP_DNA_CATABOLIC_PROCESS_ENDONUCLEOLYTIC	GOBP_DNA_CATABOLIC_PROCESS_ENDONUCLEOLYTIC	23	0.523727	1.45569	0.0475207	0.132859	1	52	tags=9%, list=0%, signal=9%
GOBP_POSITIVE_REGULATION_OF_TYPE_2_IMMUNE_RESPONSE	GOBP_POSITIVE_REGULATION_OF_TYPE_2_IMMUNE_RESPONSE	17	0.665059	1.45543	0.0596708	0.132973	1	3486	tags=65%, list=23%, signal=84%
GOBP_POSITIVE_REGULATION_OF_B_CELL_PROLIFERATION	GOBP_POSITIVE_REGULATION_OF_B_CELL_PROLIFERATION	41	0.560393	1.45513	0.0927835	0.133132	1	2330	tags=37%, list=15%, signal=43%
GOBP_POSITIVE_REGULATION_OF_ION_TRANSPORT	GOBP_POSITIVE_REGULATION_OF_ION_TRANSPORT	242	0.462512	1.45509	0.0120724	0.133059	1	3427	tags=39%, list=22%, signal=49%
GOBP_MONOCYTE_CHEMOTAXIS	GOBP_MONOCYTE_CHEMOTAXIS	53	0.630792	1.45436	0.0525253	0.133615	1	2998	tags=62%, list=20%, signal=77%
GOBP_NEGATIVE_REGULATION_OF_CELLULAR_CATABOLIC_PROCESS	GOBP_NEGATIVE_REGULATION_OF_CELLULAR_CATABOLIC_PROCESS	225	0.280136	1.45412	0.004	0.133694	1	3410	tags=19%, list=22%, signal=24%
GOBP_RENAL_SYSTEM_PROCESS_INVOLVED_IN_REGULATION_OF_SYSTEMIC_ARTERIAL_BLOOD_PRESSURE	GOBP_RENAL_SYSTEM_PROCESS_INVOLVED_IN_REGULATION_OF_SYSTEMIC_ARTERIAL_BLOOD_PRESSURE	25	0.638929	1.45307	0.0299401	0.134491	1	2457	tags=52%, list=16%, signal=62%
GOBP_T_CELL_CHEMOTAXIS	GOBP_T_CELL_CHEMOTAXIS	23	0.621437	1.45301	0.0652174	0.134432	1	2953	tags=48%, list=19%, signal=59%
GOBP_NEGATIVE_REGULATION_OF_POTASSIUM_ION_TRANSMEMBRANE_TRANSPORT	GOBP_NEGATIVE_REGULATION_OF_POTASSIUM_ION_TRANSMEMBRANE_TRANSPORT	21	0.636798	1.45283	0.0443548	0.134504	1	2024	tags=38%, list=13%, signal=44%
GOBP_REGULATION_OF_ADENYLATE_CYCLASE_ACTIVITY	GOBP_REGULATION_OF_ADENYLATE_CYCLASE_ACTIVITY	29	0.531601	1.4525	0.061753	0.134657	1	2736	tags=31%, list=18%, signal=38%
GOBP_NEGATIVE_REGULATION_OF_CATABOLIC_PROCESS	GOBP_NEGATIVE_REGULATION_OF_CATABOLIC_PROCESS	278	0.293034	1.45231	0.00801603	0.134696	1	3442	tags=20%, list=22%, signal=25%
GOBP_AXONAL_FASCICULATION	GOBP_AXONAL_FASCICULATION	22	0.618083	1.45186	0.0429688	0.135015	1	3288	tags=50%, list=21%, signal=64%
GOBP_HYDROGEN_PEROXIDE_METABOLIC_PROCESS	GOBP_HYDROGEN_PEROXIDE_METABOLIC_PROCESS	47	0.50574	1.45157	0.0443975	0.135174	1	1965	tags=23%, list=13%, signal=27%
GOBP_REGULATION_OF_POTASSIUM_ION_TRANSPORT	GOBP_REGULATION_OF_POTASSIUM_ION_TRANSPORT	95	0.505425	1.45123	0.0210325	0.135373	1	2938	tags=38%, list=19%, signal=47%
GOBP_POSITIVE_REGULATION_OF_ATP_METABOLIC_PROCESS	GOBP_POSITIVE_REGULATION_OF_ATP_METABOLIC_PROCESS	31	0.522777	1.45085	0.0512821	0.135601	1	2517	tags=32%, list=16%, signal=39%
GOBP_NEGATIVE_REGULATION_OF_PHOSPHATASE_ACTIVITY	GOBP_NEGATIVE_REGULATION_OF_PHOSPHATASE_ACTIVITY	31	0.479295	1.45042	0.06	0.135853	1	3349	tags=32%, list=22%, signal=41%
GOBP_NEGATIVE_REGULATION_OF_TRANSLATIONAL_INITIATION	GOBP_NEGATIVE_REGULATION_OF_TRANSLATIONAL_INITIATION	16	0.456844	1.45015	0.0869565	0.135974	1	195	tags=6%, list=1%, signal=6%
GOBP_REGULATION_OF_FATTY_ACID_OXIDATION	GOBP_REGULATION_OF_FATTY_ACID_OXIDATION	30	0.520873	1.44987	0.0331384	0.136092	1	2417	tags=30%, list=16%, signal=36%
GOBP_LIPID_TRANSLOCATION	GOBP_LIPID_TRANSLOCATION	49	0.488126	1.44978	0.0420842	0.136044	1	3013	tags=37%, list=20%, signal=46%
GOBP_DEFENSE_RESPONSE_TO_FUNGUS	GOBP_DEFENSE_RESPONSE_TO_FUNGUS	46	0.580107	1.44959	0.0434783	0.136113	1	2686	tags=41%, list=17%, signal=50%
GOBP_RESPONSE_TO_MUSCLE_STRETCH	GOBP_RESPONSE_TO_MUSCLE_STRETCH	24	0.564325	1.44917	0.0692308	0.136376	1	2843	tags=46%, list=19%, signal=56%
GOBP_RECEPTOR_CATABOLIC_PROCESS	GOBP_RECEPTOR_CATABOLIC_PROCESS	26	0.454449	1.44898	0.0742268	0.136437	1	2966	tags=35%, list=19%, signal=43%
GOBP_NEGATIVE_REGULATION_OF_MUSCLE_HYPERTROPHY	GOBP_NEGATIVE_REGULATION_OF_MUSCLE_HYPERTROPHY	28	0.490382	1.44877	0.0776699	0.136517	1	3627	tags=36%, list=24%, signal=47%
GOBP_MEMBRANE_DEPOLARIZATION	GOBP_MEMBRANE_DEPOLARIZATION	78	0.507103	1.44869	0.020202	0.136488	1	2991	tags=37%, list=19%, signal=46%
GOBP_POSITIVE_REGULATION_OF_BINDING	GOBP_POSITIVE_REGULATION_OF_BINDING	161	0.37272	1.44856	0.0155642	0.136474	1	4324	tags=34%, list=28%, signal=46%
GOBP_REGENERATION	GOBP_REGENERATION	166	0.413277	1.4484	0.00974659	0.136514	1	3399	tags=35%, list=22%, signal=44%
GOBP_RESPONSE_TO_PROSTAGLANDIN	GOBP_RESPONSE_TO_PROSTAGLANDIN	30	0.600605	1.44783	0.0495049	0.136887	1	1356	tags=30%, list=9%, signal=33%
GOBP_PROTEIN_PROCESSING	GOBP_PROTEIN_PROCESSING	214	0.397086	1.447	0.0175781	0.13754	1	2482	tags=21%, list=16%, signal=25%
GOBP_POSITIVE_REGULATION_OF_TRANSPORTER_ACTIVITY	GOBP_POSITIVE_REGULATION_OF_TRANSPORTER_ACTIVITY	100	0.475591	1.44682	0.0177866	0.137613	1	3453	tags=42%, list=22%, signal=54%
GOBP_POSITIVE_REGULATION_OF_NERVOUS_SYSTEM_PROCESS	GOBP_POSITIVE_REGULATION_OF_NERVOUS_SYSTEM_PROCESS	30	0.53695	1.44668	0.0318949	0.137641	1	2132	tags=33%, list=14%, signal=39%
GOBP_NEGATIVE_REGULATION_OF_MAPK_CASCADE	GOBP_NEGATIVE_REGULATION_OF_MAPK_CASCADE	158	0.391128	1.44668	0.0195312	0.13753	1	4729	tags=45%, list=31%, signal=64%
GOBP_MUSCLE_TISSUE_DEVELOPMENT	GOBP_MUSCLE_TISSUE_DEVELOPMENT	358	0.435222	1.44664	0.010142	0.137468	1	3627	tags=36%, list=24%, signal=46%
GOBP_REGULATION_OF_BONE_MINERALIZATION	GOBP_REGULATION_OF_BONE_MINERALIZATION	70	0.516515	1.44645	0.0305499	0.137511	1	3847	tags=47%, list=25%, signal=63%
GOBP_NEGATIVE_REGULATION_OF_MUSCLE_CONTRACTION	GOBP_NEGATIVE_REGULATION_OF_MUSCLE_CONTRACTION	21	0.625736	1.44642	0.0375	0.137436	1	2394	tags=52%, list=16%, signal=62%
GOBP_ATP_TRANSPORT	GOBP_ATP_TRANSPORT	16	0.498742	1.44609	0.0848485	0.137599	1	4917	tags=50%, list=32%, signal=73%
GOBP_RESPONSE_TO_CAMP	GOBP_RESPONSE_TO_CAMP	85	0.467842	1.44605	0.0238569	0.137518	1	2671	tags=35%, list=17%, signal=42%
GOBP_POSITIVE_REGULATION_OF_ALCOHOL_BIOSYNTHETIC_PROCESS	GOBP_POSITIVE_REGULATION_OF_ALCOHOL_BIOSYNTHETIC_PROCESS	24	0.578725	1.44601	0.0453564	0.137442	1	1436	tags=29%, list=9%, signal=32%
GOBP_GTP_METABOLIC_PROCESS	GOBP_GTP_METABOLIC_PROCESS	22	0.457602	1.44582	0.078629	0.137484	1	764	tags=14%, list=5%, signal=14%
GOBP_STEROL_HOMEOSTASIS	GOBP_STEROL_HOMEOSTASIS	76	0.504409	1.44579	0.0451128	0.13739	1	3300	tags=42%, list=21%, signal=53%
GOBP_REGULATION_OF_REGULATED_SECRETORY_PATHWAY	GOBP_REGULATION_OF_REGULATED_SECRETORY_PATHWAY	128	0.444059	1.44573	0.0173745	0.137321	1	3737	tags=39%, list=24%, signal=51%
GOBP_NEGATIVE_REGULATION_OF_FIBROBLAST_GROWTH_FACTOR_RECEPTOR_SIGNALING_PATHWAY	GOBP_NEGATIVE_REGULATION_OF_FIBROBLAST_GROWTH_FACTOR_RECEPTOR_SIGNALING_PATHWAY	18	0.613977	1.44501	0.0656064	0.137853	1	3275	tags=44%, list=21%, signal=56%
GOBP_POSITIVE_REGULATION_OF_OSTEOBLAST_DIFFERENTIATION	GOBP_POSITIVE_REGULATION_OF_OSTEOBLAST_DIFFERENTIATION	59	0.508767	1.44493	0.0506073	0.137805	1	3596	tags=41%, list=23%, signal=53%
GOBP_RENAL_SYSTEM_PROCESS_INVOLVED_IN_REGULATION_OF_BLOOD_VOLUME	GOBP_RENAL_SYSTEM_PROCESS_INVOLVED_IN_REGULATION_OF_BLOOD_VOLUME	15	0.640173	1.44492	0.056338	0.137703	1	3845	tags=73%, list=25%, signal=98%
GOBP_REGULATION_OF_TUBE_SIZE	GOBP_REGULATION_OF_TUBE_SIZE	132	0.500709	1.44491	0.0318725	0.137602	1	2703	tags=34%, list=18%, signal=41%
GOBP_POSITIVE_REGULATION_OF_MEMBRANE_PROTEIN_ECTODOMAIN_PROTEOLYSIS	GOBP_POSITIVE_REGULATION_OF_MEMBRANE_PROTEIN_ECTODOMAIN_PROTEOLYSIS	15	0.621484	1.44421	0.0683761	0.138101	1	3757	tags=60%, list=24%, signal=79%
GOBP_POST_EMBRYONIC_DEVELOPMENT	GOBP_POST_EMBRYONIC_DEVELOPMENT	80	0.395138	1.44383	0.0515464	0.13835	1	3426	tags=28%, list=22%, signal=35%
GOBP_NEGATIVE_CHEMOTAXIS	GOBP_NEGATIVE_CHEMOTAXIS	47	0.559297	1.44382	0.046371	0.138248	1	3349	tags=45%, list=22%, signal=57%
GOBP_EXOCYTOSIS	GOBP_EXOCYTOSIS	323	0.394998	1.44325	0.0213592	0.138602	1	3156	tags=28%, list=21%, signal=34%
GOBP_RESPONSE_TO_UV_B	GOBP_RESPONSE_TO_UV_B	16	0.618517	1.44293	0.0566802	0.138798	1	2712	tags=50%, list=18%, signal=61%
GOBP_ACUTE_INFLAMMATORY_RESPONSE	GOBP_ACUTE_INFLAMMATORY_RESPONSE	100	0.506366	1.44289	0.0354331	0.138721	1	2394	tags=35%, list=16%, signal=41%
GOBP_REGULATION_OF_PROTEIN_DEACETYLATION	GOBP_REGULATION_OF_PROTEIN_DEACETYLATION	53	0.368081	1.44283	0.0542169	0.138652	1	2707	tags=23%, list=18%, signal=27%
GOBP_POSITIVE_REGULATION_OF_ESTABLISHMENT_OF_PROTEIN_LOCALIZATION	GOBP_POSITIVE_REGULATION_OF_ESTABLISHMENT_OF_PROTEIN_LOCALIZATION	278	0.321998	1.4427	0.0116732	0.138646	1	3842	tags=25%, list=25%, signal=33%
GOBP_REGULATION_OF_PLATELET_ACTIVATION	GOBP_REGULATION_OF_PLATELET_ACTIVATION	45	0.566534	1.44185	0.0355731	0.139215	1	3111	tags=51%, list=20%, signal=64%
GOBP_BONE_CELL_DEVELOPMENT	GOBP_BONE_CELL_DEVELOPMENT	34	0.511819	1.44171	0.0851485	0.13923	1	2604	tags=41%, list=17%, signal=49%
GOBP_POSITIVE_REGULATION_OF_BLOOD_CIRCULATION	GOBP_POSITIVE_REGULATION_OF_BLOOD_CIRCULATION	36	0.56741	1.4416	0.036	0.139234	1	3676	tags=44%, list=24%, signal=58%
GOBP_NEGATIVE_REGULATION_OF_SIGNAL_TRANSDUCTION_IN_ABSENCE_OF_LIGAND	GOBP_NEGATIVE_REGULATION_OF_SIGNAL_TRANSDUCTION_IN_ABSENCE_OF_LIGAND	31	0.572762	1.44117	0.04158	0.139472	1	1875	tags=26%, list=12%, signal=29%
GOBP_POSITIVE_REGULATION_OF_INTRACELLULAR_TRANSPORT	GOBP_POSITIVE_REGULATION_OF_INTRACELLULAR_TRANSPORT	172	0.297066	1.44113	0.0325203	0.139402	1	3568	tags=23%, list=23%, signal=30%
GOBP_POSITIVE_REGULATION_OF_LIPID_LOCALIZATION	GOBP_POSITIVE_REGULATION_OF_LIPID_LOCALIZATION	104	0.461944	1.44052	0.0211946	0.139859	1	3420	tags=39%, list=22%, signal=50%
GOBP_ADAPTIVE_THERMOGENESIS	GOBP_ADAPTIVE_THERMOGENESIS	155	0.411521	1.44042	0.0198413	0.139836	1	3318	tags=28%, list=22%, signal=36%
GOBP_POSITIVE_REGULATION_OF_PROTEIN_LOCALIZATION	GOBP_POSITIVE_REGULATION_OF_PROTEIN_LOCALIZATION	401	0.319349	1.44037	0.00796813	0.139771	1	3798	tags=26%, list=25%, signal=34%
GOBP_REGULATION_OF_TOLERANCE_INDUCTION	GOBP_REGULATION_OF_TOLERANCE_INDUCTION	19	0.672274	1.44003	0.0803383	0.139974	1	3459	tags=74%, list=23%, signal=95%
GOBP_REGULATION_OF_OSTEOBLAST_DIFFERENTIATION	GOBP_REGULATION_OF_OSTEOBLAST_DIFFERENTIATION	112	0.49093	1.43981	0.0506073	0.140089	1	4037	tags=44%, list=26%, signal=59%
GOBP_REGULATION_OF_WNT_SIGNALING_PATHWAY_PLANAR_CELL_POLARITY_PATHWAY	GOBP_REGULATION_OF_WNT_SIGNALING_PATHWAY_PLANAR_CELL_POLARITY_PATHWAY	16	0.641751	1.43959	0.0531915	0.140169	1	4378	tags=63%, list=29%, signal=87%
GOBP_REGULATION_OF_DEFENSE_RESPONSE_TO_BACTERIUM	GOBP_REGULATION_OF_DEFENSE_RESPONSE_TO_BACTERIUM	18	0.606361	1.43936	0.0592885	0.14026	1	4304	tags=78%, list=28%, signal=108%
GOBP_COGNITION	GOBP_COGNITION	283	0.426378	1.43933	0.0128913	0.140185	1	3617	tags=31%, list=24%, signal=40%
GOBP_LYMPH_NODE_DEVELOPMENT	GOBP_LYMPH_NODE_DEVELOPMENT	18	0.632635	1.43882	0.0807087	0.140492	1	3189	tags=61%, list=21%, signal=77%
GOBP_REGULATION_OF_INTRACELLULAR_TRANSPORT	GOBP_REGULATION_OF_INTRACELLULAR_TRANSPORT	293	0.286181	1.43876	0.0250482	0.140433	1	3695	tags=22%, list=24%, signal=28%
GOBP_PYROPTOSIS	GOBP_PYROPTOSIS	20	0.607424	1.43874	0.0763052	0.140347	1	2422	tags=45%, list=16%, signal=53%
GOBP_NEGATIVE_REGULATION_OF_VIRAL_GENOME_REPLICATION	GOBP_NEGATIVE_REGULATION_OF_VIRAL_GENOME_REPLICATION	49	0.500537	1.43858	0.128257	0.140391	1	4140	tags=47%, list=27%, signal=64%
GOBP_VASCULAR_PROCESS_IN_CIRCULATORY_SYSTEM	GOBP_VASCULAR_PROCESS_IN_CIRCULATORY_SYSTEM	251	0.474692	1.43838	0.0141129	0.140453	1	2703	tags=31%, list=18%, signal=38%
GOBP_TRABECULA_MORPHOGENESIS	GOBP_TRABECULA_MORPHOGENESIS	45	0.496694	1.43837	0.0609037	0.14036	1	2418	tags=29%, list=16%, signal=34%
GOBP_CELL_COMMUNICATION_INVOLVED_IN_CARDIAC_CONDUCTION	GOBP_CELL_COMMUNICATION_INVOLVED_IN_CARDIAC_CONDUCTION	53	0.546124	1.43823	0.0479042	0.140341	1	2387	tags=34%, list=16%, signal=40%
GOBP_POSITIVE_REGULATION_OF_STRESS_FIBER_ASSEMBLY	GOBP_POSITIVE_REGULATION_OF_STRESS_FIBER_ASSEMBLY	48	0.434258	1.43778	0.0640496	0.140629	1	4767	tags=40%, list=31%, signal=57%
GOBP_CHEMOKINE_C_X_C_MOTIF_LIGAND_2_PRODUCTION	GOBP_CHEMOKINE_C_X_C_MOTIF_LIGAND_2_PRODUCTION	16	0.587212	1.43773	0.0829876	0.140575	1	4073	tags=56%, list=27%, signal=76%
GOBP_MAINTENANCE_OF_PROTEIN_LOCATION	GOBP_MAINTENANCE_OF_PROTEIN_LOCATION	88	0.333813	1.43767	0.0456432	0.140518	1	4825	tags=34%, list=31%, signal=49%
GOBP_REGULATION_OF_PROTEIN_POLYUBIQUITINATION	GOBP_REGULATION_OF_PROTEIN_POLYUBIQUITINATION	26	0.415539	1.43763	0.0914513	0.14045	1	2717	tags=19%, list=18%, signal=23%
GOBP_CELLULAR_RESPONSE_TO_ATP	GOBP_CELLULAR_RESPONSE_TO_ATP	16	0.588134	1.43736	0.0631164	0.140605	1	2355	tags=31%, list=15%, signal=37%
GOBP_MORPHOGENESIS_OF_AN_ENDOTHELIUM	GOBP_MORPHOGENESIS_OF_AN_ENDOTHELIUM	17	0.556236	1.43679	0.103448	0.140971	1	2532	tags=29%, list=16%, signal=35%
GOBP_VENOUS_BLOOD_VESSEL_DEVELOPMENT	GOBP_VENOUS_BLOOD_VESSEL_DEVELOPMENT	16	0.61006	1.43664	0.0883534	0.140987	1	3409	tags=56%, list=22%, signal=72%
GOBP_RESPONSE_TO_COLD	GOBP_RESPONSE_TO_COLD	48	0.44182	1.43658	0.0320641	0.140942	1	3706	tags=33%, list=24%, signal=44%
GOBP_REGULATION_OF_LIPID_LOCALIZATION	GOBP_REGULATION_OF_LIPID_LOCALIZATION	154	0.438164	1.4363	0.011976	0.1411	1	3207	tags=33%, list=21%, signal=41%
GOBP_NEUROTRANSMITTER_REUPTAKE	GOBP_NEUROTRANSMITTER_REUPTAKE	34	0.563607	1.43625	0.0280374	0.14105	1	1783	tags=29%, list=12%, signal=33%
GOBP_VESICLE_MEDIATED_TRANSPORT_BETWEEN_ENDOSOMAL_COMPARTMENTS	GOBP_VESICLE_MEDIATED_TRANSPORT_BETWEEN_ENDOSOMAL_COMPARTMENTS	41	0.339782	1.43608	0.10989	0.141067	1	2744	tags=17%, list=18%, signal=21%
GOBP_STEM_CELL_DIVISION	GOBP_STEM_CELL_DIVISION	27	0.495928	1.43581	0.0668058	0.141214	1	3118	tags=30%, list=20%, signal=37%
GOBP_REGULATION_OF_CARDIAC_CONDUCTION	GOBP_REGULATION_OF_CARDIAC_CONDUCTION	24	0.551683	1.43538	0.0413386	0.141469	1	3676	tags=42%, list=24%, signal=55%
GOBP_REGULATION_OF_CARBOHYDRATE_BIOSYNTHETIC_PROCESS	GOBP_REGULATION_OF_CARBOHYDRATE_BIOSYNTHETIC_PROCESS	86	0.402557	1.43503	0.0368098	0.1417	1	2925	tags=24%, list=19%, signal=30%
GOBP_POSITIVE_REGULATION_OF_LIPID_BIOSYNTHETIC_PROCESS	GOBP_POSITIVE_REGULATION_OF_LIPID_BIOSYNTHETIC_PROCESS	75	0.448662	1.43462	0.030888	0.141984	1	4016	tags=41%, list=26%, signal=56%
GOBP_POSITIVE_REGULATION_OF_GLYCOPROTEIN_METABOLIC_PROCESS	GOBP_POSITIVE_REGULATION_OF_GLYCOPROTEIN_METABOLIC_PROCESS	20	0.573428	1.43455	0.10119	0.141937	1	1346	tags=25%, list=9%, signal=27%
GOBP_NEUROMUSCULAR_JUNCTION_DEVELOPMENT	GOBP_NEUROMUSCULAR_JUNCTION_DEVELOPMENT	42	0.488288	1.43433	0.0325866	0.142036	1	3370	tags=36%, list=22%, signal=46%
GOBP_POSITIVE_REGULATION_OF_CELL_SUBSTRATE_JUNCTION_ORGANIZATION	GOBP_POSITIVE_REGULATION_OF_CELL_SUBSTRATE_JUNCTION_ORGANIZATION	31	0.484946	1.43373	0.0699589	0.142472	1	4725	tags=48%, list=31%, signal=70%
GOBP_HINDLIMB_MORPHOGENESIS	GOBP_HINDLIMB_MORPHOGENESIS	33	0.561614	1.43339	0.0327198	0.142654	1	3118	tags=39%, list=20%, signal=49%
GOBP_BIOLOGICAL_PROCESS_INVOLVED_IN_INTERACTION_WITH_SYMBIONT	GOBP_BIOLOGICAL_PROCESS_INVOLVED_IN_INTERACTION_WITH_SYMBIONT	89	0.427715	1.43328	0.0253411	0.142626	1	3171	tags=27%, list=21%, signal=34%
GOBP_GLYCOPROTEIN_CATABOLIC_PROCESS	GOBP_GLYCOPROTEIN_CATABOLIC_PROCESS	23	0.522362	1.43318	0.0715835	0.142612	1	5253	tags=61%, list=34%, signal=92%
GOBP_PURINE_CONTAINING_COMPOUND_TRANSMEMBRANE_TRANSPORT	GOBP_PURINE_CONTAINING_COMPOUND_TRANSMEMBRANE_TRANSPORT	25	0.507876	1.43298	0.0552268	0.142675	1	719	tags=12%, list=5%, signal=13%
GOBP_REGULATION_OF_BLOOD_CIRCULATION	GOBP_REGULATION_OF_BLOOD_CIRCULATION	234	0.471941	1.43207	0.0155642	0.143378	1	3717	tags=40%, list=24%, signal=52%
GOBP_REGULATION_OF_EXTRINSIC_APOPTOTIC_SIGNALING_PATHWAY_IN_ABSENCE_OF_LIGAND	GOBP_REGULATION_OF_EXTRINSIC_APOPTOTIC_SIGNALING_PATHWAY_IN_ABSENCE_OF_LIGAND	41	0.515659	1.43186	0.0452675	0.143459	1	1224	tags=20%, list=8%, signal=21%
GOBP_STEROID_CATABOLIC_PROCESS	GOBP_STEROID_CATABOLIC_PROCESS	26	0.54148	1.43183	0.042471	0.143379	1	2518	tags=38%, list=16%, signal=46%
GOBP_POSITIVE_REGULATION_OF_MUSCLE_HYPERTROPHY	GOBP_POSITIVE_REGULATION_OF_MUSCLE_HYPERTROPHY	25	0.524739	1.4317	0.0608519	0.143396	1	4091	tags=48%, list=27%, signal=65%
GOBP_REGULATION_OF_RYANODINE_SENSITIVE_CALCIUM_RELEASE_CHANNEL_ACTIVITY	GOBP_REGULATION_OF_RYANODINE_SENSITIVE_CALCIUM_RELEASE_CHANNEL_ACTIVITY	22	0.613412	1.43164	0.0611814	0.143338	1	3556	tags=55%, list=23%, signal=71%
GOBP_STRIATED_MUSCLE_CELL_DEVELOPMENT	GOBP_STRIATED_MUSCLE_CELL_DEVELOPMENT	64	0.530348	1.43143	0.0567515	0.143428	1	3422	tags=41%, list=22%, signal=52%
GOBP_ICOSANOID_BIOSYNTHETIC_PROCESS	GOBP_ICOSANOID_BIOSYNTHETIC_PROCESS	45	0.527734	1.43037	0.0618763	0.144254	1	3495	tags=47%, list=23%, signal=60%
GOBP_SMOOTH_MUSCLE_CELL_APOPTOTIC_PROCESS	GOBP_SMOOTH_MUSCLE_CELL_APOPTOTIC_PROCESS	21	0.582815	1.42986	0.0572597	0.1446	1	2585	tags=38%, list=17%, signal=46%
GOBP_REGULATION_OF_RUFFLE_ASSEMBLY	GOBP_REGULATION_OF_RUFFLE_ASSEMBLY	29	0.480612	1.42929	0.0662768	0.144986	1	4236	tags=48%, list=28%, signal=67%
GOBP_VASCULAR_ASSOCIATED_SMOOTH_MUSCLE_CELL_DIFFERENTIATION	GOBP_VASCULAR_ASSOCIATED_SMOOTH_MUSCLE_CELL_DIFFERENTIATION	26	0.533407	1.42928	0.0614754	0.144883	1	3440	tags=42%, list=22%, signal=54%
GOBP_STEROL_TRANSPORT	GOBP_STEROL_TRANSPORT	112	0.444921	1.42922	0.0419048	0.144829	1	4501	tags=46%, list=29%, signal=64%
GOBP_ASTROCYTE_DIFFERENTIATION	GOBP_ASTROCYTE_DIFFERENTIATION	73	0.511887	1.4289	0.032381	0.145011	1	3385	tags=41%, list=22%, signal=52%
GOBP_NEURON_DEATH_IN_RESPONSE_TO_OXIDATIVE_STRESS	GOBP_NEURON_DEATH_IN_RESPONSE_TO_OXIDATIVE_STRESS	30	0.476526	1.42871	0.0892857	0.14508	1	3437	tags=33%, list=22%, signal=43%
GOBP_BLOOD_VESSEL_REMODELING	GOBP_BLOOD_VESSEL_REMODELING	41	0.478312	1.42859	0.0549898	0.145065	1	3409	tags=39%, list=22%, signal=50%
GOBP_CELL_GROWTH	GOBP_CELL_GROWTH	437	0.3593	1.42859	0.0193798	0.144961	1	4545	tags=36%, list=30%, signal=50%
GOBP_POSITIVE_REGULATION_OF_SMALL_MOLECULE_METABOLIC_PROCESS	GOBP_POSITIVE_REGULATION_OF_SMALL_MOLECULE_METABOLIC_PROCESS	127	0.436975	1.42845	0.0155642	0.144983	1	1546	tags=20%, list=10%, signal=22%
GOBP_POSITIVE_REGULATION_OF_MACROPHAGE_DIFFERENTIATION	GOBP_POSITIVE_REGULATION_OF_MACROPHAGE_DIFFERENTIATION	15	0.552388	1.42832	0.0934959	0.144979	1	4571	tags=73%, list=30%, signal=104%
GOBP_GLYCOSYL_COMPOUND_CATABOLIC_PROCESS	GOBP_GLYCOSYL_COMPOUND_CATABOLIC_PROCESS	30	0.515985	1.42813	0.0662768	0.145041	1	4004	tags=43%, list=26%, signal=59%
GOBP_SKELETAL_MUSCLE_ORGAN_DEVELOPMENT	GOBP_SKELETAL_MUSCLE_ORGAN_DEVELOPMENT	147	0.44486	1.42802	0.0297619	0.145026	1	3229	tags=33%, list=21%, signal=41%
GOBP_CELL_DIFFERENTIATION_INVOLVED_IN_KIDNEY_DEVELOPMENT	GOBP_CELL_DIFFERENTIATION_INVOLVED_IN_KIDNEY_DEVELOPMENT	55	0.488509	1.42801	0.0351967	0.14492	1	3419	tags=36%, list=22%, signal=47%
GOBP_POSITIVE_REGULATION_OF_ISOTYPE_SWITCHING	GOBP_POSITIVE_REGULATION_OF_ISOTYPE_SWITCHING	20	0.560357	1.42746	0.112474	0.145302	1	1176	tags=25%, list=8%, signal=27%
GOBP_CARDIOCYTE_DIFFERENTIATION	GOBP_CARDIOCYTE_DIFFERENTIATION	129	0.447	1.42741	0.0316206	0.14523	1	3627	tags=39%, list=24%, signal=50%
GOBP_OLFACTORY_LOBE_DEVELOPMENT	GOBP_OLFACTORY_LOBE_DEVELOPMENT	33	0.534816	1.42735	0.0509804	0.145183	1	1146	tags=24%, list=7%, signal=26%
GOBP_REGULATION_OF_FATTY_ACID_METABOLIC_PROCESS	GOBP_REGULATION_OF_FATTY_ACID_METABOLIC_PROCESS	80	0.417052	1.42723	0.0289575	0.145168	1	3259	tags=28%, list=21%, signal=35%
GOBP_SOMATIC_DIVERSIFICATION_OF_IMMUNOGLOBULINS	GOBP_SOMATIC_DIVERSIFICATION_OF_IMMUNOGLOBULINS	56	0.451105	1.42721	0.0995935	0.145078	1	1176	tags=18%, list=8%, signal=19%
GOBP_NEPHRON_TUBULE_FORMATION	GOBP_NEPHRON_TUBULE_FORMATION	18	0.600593	1.42662	0.0423892	0.145462	1	938	tags=22%, list=6%, signal=24%
GOBP_POSITIVE_REGULATION_OF_MAST_CELL_ACTIVATION_INVOLVED_IN_IMMUNE_RESPONSE	GOBP_POSITIVE_REGULATION_OF_MAST_CELL_ACTIVATION_INVOLVED_IN_IMMUNE_RESPONSE	15	0.577878	1.42626	0.0824742	0.145712	1	5983	tags=80%, list=39%, signal=131%
GOBP_POLYOL_BIOSYNTHETIC_PROCESS	GOBP_POLYOL_BIOSYNTHETIC_PROCESS	59	0.43766	1.42558	0.0321932	0.146219	1	1541	tags=19%, list=10%, signal=21%
GOBP_REGULATION_OF_PHOSPHOLIPID_METABOLIC_PROCESS	GOBP_REGULATION_OF_PHOSPHOLIPID_METABOLIC_PROCESS	33	0.461376	1.42514	0.0542798	0.146553	1	5007	tags=55%, list=33%, signal=81%
GOBP_REGULATION_OF_HEART_RATE	GOBP_REGULATION_OF_HEART_RATE	95	0.496681	1.42495	0.0259481	0.146625	1	3664	tags=41%, list=24%, signal=54%
GOBP_OSSIFICATION	GOBP_OSSIFICATION	370	0.438284	1.42482	0.0362903	0.146634	1	3912	tags=39%, list=25%, signal=51%
GOBP_MORPHOGENESIS_OF_AN_EPITHELIAL_BUD	GOBP_MORPHOGENESIS_OF_AN_EPITHELIAL_BUD	15	0.66357	1.42472	0.0698152	0.146622	1	3136	tags=60%, list=20%, signal=75%
GOBP_CELL_DEATH_IN_RESPONSE_TO_OXIDATIVE_STRESS	GOBP_CELL_DEATH_IN_RESPONSE_TO_OXIDATIVE_STRESS	80	0.39178	1.4246	0.0413386	0.14662	1	3133	tags=26%, list=20%, signal=33%
GOBP_PULMONARY_VALVE_MORPHOGENESIS	GOBP_PULMONARY_VALVE_MORPHOGENESIS	17	0.625913	1.42452	0.0813704	0.146604	1	3832	tags=65%, list=25%, signal=86%
GOBP_POSITIVE_REGULATION_OF_MYELOID_LEUKOCYTE_DIFFERENTIATION	GOBP_POSITIVE_REGULATION_OF_MYELOID_LEUKOCYTE_DIFFERENTIATION	50	0.490136	1.42451	0.0640777	0.146497	1	4372	tags=62%, list=28%, signal=86%
GOBP_RENAL_SYSTEM_PROCESS	GOBP_RENAL_SYSTEM_PROCESS	104	0.466618	1.42427	0.028169	0.146622	1	3677	tags=40%, list=24%, signal=53%
GOBP_LONG_TERM_SYNAPTIC_POTENTIATION	GOBP_LONG_TERM_SYNAPTIC_POTENTIATION	79	0.498895	1.42332	0.046875	0.147412	1	3002	tags=34%, list=20%, signal=42%
GOBP_HEART_FORMATION	GOBP_HEART_FORMATION	30	0.569107	1.42298	0.0653061	0.147646	1	3471	tags=47%, list=23%, signal=60%
GOBP_REGULATION_OF_HOMOTYPIC_CELL_CELL_ADHESION	GOBP_REGULATION_OF_HOMOTYPIC_CELL_CELL_ADHESION	32	0.563165	1.42297	0.0632411	0.147542	1	3251	tags=50%, list=21%, signal=63%
GOBP_REGULATION_OF_OXIDATIVE_STRESS_INDUCED_INTRINSIC_APOPTOTIC_SIGNALING_PATHWAY	GOBP_REGULATION_OF_OXIDATIVE_STRESS_INDUCED_INTRINSIC_APOPTOTIC_SIGNALING_PATHWAY	27	0.42969	1.42284	0.117647	0.147554	1	2173	tags=15%, list=14%, signal=17%
GOBP_GLYCEROLIPID_METABOLIC_PROCESS	GOBP_GLYCEROLIPID_METABOLIC_PROCESS	351	0.352659	1.42235	0.0299401	0.147908	1	3540	tags=28%, list=23%, signal=35%
GOBP_REGULATION_OF_BIOLOGICAL_PROCESS_INVOLVED_IN_SYMBIOTIC_INTERACTION	GOBP_REGULATION_OF_BIOLOGICAL_PROCESS_INVOLVED_IN_SYMBIOTIC_INTERACTION	51	0.515437	1.42198	0.0433884	0.148167	1	2730	tags=31%, list=18%, signal=38%
GOBP_REGULATION_OF_TRANSMEMBRANE_RECEPTOR_PROTEIN_SERINE_THREONINE_KINASE_SIGNALING_PATHWAY	GOBP_REGULATION_OF_TRANSMEMBRANE_RECEPTOR_PROTEIN_SERINE_THREONINE_KINASE_SIGNALING_PATHWAY	237	0.422815	1.42178	0.0240964	0.148244	1	3419	tags=32%, list=22%, signal=41%
GOBP_NEGATIVE_REGULATION_OF_PROTEIN_CONTAINING_COMPLEX_DISASSEMBLY	GOBP_NEGATIVE_REGULATION_OF_PROTEIN_CONTAINING_COMPLEX_DISASSEMBLY	71	0.41434	1.42175	0.0544747	0.148167	1	3665	tags=39%, list=24%, signal=52%
GOBP_RENAL_FILTRATION	GOBP_RENAL_FILTRATION	21	0.57838	1.42167	0.0828283	0.148117	1	4354	tags=71%, list=28%, signal=100%
GOBP_PHAGOSOME_MATURATION	GOBP_PHAGOSOME_MATURATION	24	0.489655	1.42154	0.10998	0.148143	1	2762	tags=38%, list=18%, signal=46%
GOBP_POSITIVE_REGULATION_OF_NITRIC_OXIDE_SYNTHASE_ACTIVITY	GOBP_POSITIVE_REGULATION_OF_NITRIC_OXIDE_SYNTHASE_ACTIVITY	20	0.51646	1.42153	0.062249	0.148044	1	2703	tags=35%, list=18%, signal=42%
GOBP_REGULATION_OF_FIBROBLAST_MIGRATION	GOBP_REGULATION_OF_FIBROBLAST_MIGRATION	31	0.461736	1.42126	0.0806452	0.148148	1	5951	tags=61%, list=39%, signal=100%
GOBP_REGULATION_OF_LIPID_CATABOLIC_PROCESS	GOBP_REGULATION_OF_LIPID_CATABOLIC_PROCESS	56	0.470087	1.4212	0.0294695	0.148101	1	2417	tags=30%, list=16%, signal=36%
GOBP_MULTI_MULTICELLULAR_ORGANISM_PROCESS	GOBP_MULTI_MULTICELLULAR_ORGANISM_PROCESS	197	0.426161	1.41973	0.0194175	0.149305	1	3506	tags=32%, list=23%, signal=42%
GOBP_RESPIRATORY_SYSTEM_DEVELOPMENT	GOBP_RESPIRATORY_SYSTEM_DEVELOPMENT	194	0.437168	1.41959	0.0247934	0.149327	1	3826	tags=38%, list=25%, signal=49%
GOBP_REGULATION_OF_RESPONSE_TO_WOUNDING	GOBP_REGULATION_OF_RESPONSE_TO_WOUNDING	149	0.466863	1.41955	0.0242424	0.149255	1	3148	tags=39%, list=20%, signal=48%
GOBP_PHOSPHATIDYLCHOLINE_CATABOLIC_PROCESS	GOBP_PHOSPHATIDYLCHOLINE_CATABOLIC_PROCESS	15	0.600259	1.41908	0.0821918	0.149593	1	3091	tags=60%, list=20%, signal=75%
GOBP_GANGLIOSIDE_METABOLIC_PROCESS	GOBP_GANGLIOSIDE_METABOLIC_PROCESS	25	0.525294	1.41893	0.0630252	0.149633	1	4682	tags=48%, list=30%, signal=69%
GOBP_CELLULAR_RESPONSE_TO_CHEMICAL_STRESS	GOBP_CELLULAR_RESPONSE_TO_CHEMICAL_STRESS	300	0.324243	1.41867	0.0235756	0.149759	1	4313	tags=31%, list=28%, signal=42%
GOBP_REGULATION_OF_OXIDATIVE_STRESS_INDUCED_CELL_DEATH	GOBP_REGULATION_OF_OXIDATIVE_STRESS_INDUCED_CELL_DEATH	62	0.414991	1.41865	0.0630975	0.149665	1	1756	tags=18%, list=11%, signal=20%
GOBP_REGULATION_OF_BINDING	GOBP_REGULATION_OF_BINDING	341	0.342978	1.4186	0.0134357	0.149611	1	3665	tags=26%, list=24%, signal=34%
GOBP_PROTEIN_MATURATION	GOBP_PROTEIN_MATURATION	275	0.354797	1.41841	0.0216535	0.149674	1	2482	tags=19%, list=16%, signal=22%
GOBP_PROTEIN_COMPLEX_OLIGOMERIZATION	GOBP_PROTEIN_COMPLEX_OLIGOMERIZATION	232	0.346029	1.41838	0.0122449	0.149592	1	3397	tags=25%, list=22%, signal=31%
GOBP_REGULATION_OF_GENE_SILENCING_BY_RNA	GOBP_REGULATION_OF_GENE_SILENCING_BY_RNA	45	0.43941	1.41774	0.0842105	0.150089	1	2675	tags=24%, list=17%, signal=30%
GOBP_SEMAPHORIN_PLEXIN_SIGNALING_PATHWAY	GOBP_SEMAPHORIN_PLEXIN_SIGNALING_PATHWAY	43	0.518888	1.41766	0.0748988	0.15006	1	4275	tags=53%, list=28%, signal=74%
GOBP_APOPTOTIC_DNA_FRAGMENTATION	GOBP_APOPTOTIC_DNA_FRAGMENTATION	16	0.605847	1.41761	0.0585774	0.149987	1	52	tags=13%, list=0%, signal=13%
GOBP_ATRIAL_CARDIAC_MUSCLE_CELL_TO_AV_NODE_CELL_SIGNALING	GOBP_ATRIAL_CARDIAC_MUSCLE_CELL_TO_AV_NODE_CELL_SIGNALING	17	0.649106	1.41745	0.0755467	0.150039	1	2267	tags=47%, list=15%, signal=55%
GOBP_T_CELL_TOLERANCE_INDUCTION	GOBP_T_CELL_TOLERANCE_INDUCTION	15	0.684447	1.41685	0.100205	0.150462	1	3459	tags=73%, list=23%, signal=95%
GOBP_POSITIVE_REGULATION_OF_LAMELLIPODIUM_ORGANIZATION	GOBP_POSITIVE_REGULATION_OF_LAMELLIPODIUM_ORGANIZATION	33	0.424962	1.41606	0.0714286	0.151058	1	4777	tags=42%, list=31%, signal=61%
GOBP_PROTEIN_TARGETING_TO_MEMBRANE	GOBP_PROTEIN_TARGETING_TO_MEMBRANE	103	0.309003	1.41601	0.0607287	0.151001	1	3024	tags=17%, list=20%, signal=20%
GOBP_NEURON_PROJECTION_EXTENSION	GOBP_NEURON_PROJECTION_EXTENSION	161	0.40722	1.41573	0.0328185	0.151129	1	3680	tags=34%, list=24%, signal=44%
GOBP_POSITIVE_REGULATION_OF_GRANULOCYTE_CHEMOTAXIS	GOBP_POSITIVE_REGULATION_OF_GRANULOCYTE_CHEMOTAXIS	25	0.583591	1.41473	0.0850202	0.151946	1	2907	tags=48%, list=19%, signal=59%
GOBP_POSITIVE_REGULATION_OF_INTERLEUKIN_17_PRODUCTION	GOBP_POSITIVE_REGULATION_OF_INTERLEUKIN_17_PRODUCTION	24	0.630964	1.41458	0.0795229	0.151974	1	2538	tags=54%, list=17%, signal=65%
GOBP_OVULATION_CYCLE_PROCESS	GOBP_OVULATION_CYCLE_PROCESS	47	0.502718	1.41389	0.048583	0.152519	1	3160	tags=34%, list=21%, signal=43%
GOBP_SKELETAL_MUSCLE_ADAPTATION	GOBP_SKELETAL_MUSCLE_ADAPTATION	21	0.604049	1.41369	0.0730223	0.152591	1	1007	tags=24%, list=7%, signal=25%
GOBP_NEGATIVE_REGULATION_OF_GROWTH	GOBP_NEGATIVE_REGULATION_OF_GROWTH	221	0.408873	1.41352	0.0301205	0.152653	1	3717	tags=37%, list=24%, signal=48%
GOBP_CANONICAL_WNT_SIGNALING_PATHWAY	GOBP_CANONICAL_WNT_SIGNALING_PATHWAY	276	0.394041	1.41335	0.0390947	0.152705	1	4479	tags=38%, list=29%, signal=53%
GOBP_AMINOGLYCAN_BIOSYNTHETIC_PROCESS	GOBP_AMINOGLYCAN_BIOSYNTHETIC_PROCESS	77	0.447976	1.41258	0.0619835	0.153329	1	3610	tags=40%, list=24%, signal=52%
GOBP_EXCITATORY_SYNAPSE_ASSEMBLY	GOBP_EXCITATORY_SYNAPSE_ASSEMBLY	24	0.607802	1.41226	0.0588235	0.153534	1	3553	tags=50%, list=23%, signal=65%
GOBP_NEGATIVE_REGULATION_OF_G_PROTEIN_COUPLED_RECEPTOR_SIGNALING_PATHWAY	GOBP_NEGATIVE_REGULATION_OF_G_PROTEIN_COUPLED_RECEPTOR_SIGNALING_PATHWAY	47	0.488526	1.41224	0.0442656	0.153441	1	3323	tags=36%, list=22%, signal=46%
GOBP_MAINTENANCE_OF_PROTEIN_LOCATION_IN_CELL	GOBP_MAINTENANCE_OF_PROTEIN_LOCATION_IN_CELL	62	0.341151	1.41202	0.0727273	0.153522	1	5013	tags=37%, list=33%, signal=55%
GOBP_POSITIVE_REGULATION_OF_AMYLOID_PRECURSOR_PROTEIN_CATABOLIC_PROCESS	GOBP_POSITIVE_REGULATION_OF_AMYLOID_PRECURSOR_PROTEIN_CATABOLIC_PROCESS	20	0.512238	1.41202	0.0781563	0.153411	1	3951	tags=50%, list=26%, signal=67%
GOBP_REGULATION_OF_GOLGI_ORGANIZATION	GOBP_REGULATION_OF_GOLGI_ORGANIZATION	16	0.393479	1.41175	0.0995851	0.153555	1	3490	tags=25%, list=23%, signal=32%
GOBP_PROTEIN_KINASE_A_SIGNALING	GOBP_PROTEIN_KINASE_A_SIGNALING	30	0.5267	1.41137	0.0533333	0.153815	1	2688	tags=37%, list=18%, signal=44%
GOBP_NEGATIVE_REGULATION_OF_SMOOTH_MUSCLE_CELL_DIFFERENTIATION	GOBP_NEGATIVE_REGULATION_OF_SMOOTH_MUSCLE_CELL_DIFFERENTIATION	16	0.557393	1.41134	0.0921844	0.153735	1	5498	tags=69%, list=36%, signal=107%
GOBP_RIBONUCLEOSIDE_METABOLIC_PROCESS	GOBP_RIBONUCLEOSIDE_METABOLIC_PROCESS	31	0.497121	1.41124	0.0745968	0.153718	1	4004	tags=42%, list=26%, signal=57%
GOBP_ADENYLATE_CYCLASE_ACTIVATING_G_PROTEIN_COUPLED_RECEPTOR_SIGNALING_PATHWAY	GOBP_ADENYLATE_CYCLASE_ACTIVATING_G_PROTEIN_COUPLED_RECEPTOR_SIGNALING_PATHWAY	125	0.457424	1.41115	0.0241449	0.153709	1	3655	tags=38%, list=24%, signal=50%
GOBP_POSITIVE_REGULATION_OF_CANONICAL_WNT_SIGNALING_PATHWAY	GOBP_POSITIVE_REGULATION_OF_CANONICAL_WNT_SIGNALING_PATHWAY	96	0.410053	1.4109	0.0556745	0.153828	1	4753	tags=45%, list=31%, signal=64%
GOBP_SOMATIC_DIVERSIFICATION_OF_IMMUNE_RECEPTORS	GOBP_SOMATIC_DIVERSIFICATION_OF_IMMUNE_RECEPTORS	68	0.436894	1.41077	0.104723	0.153828	1	2538	tags=24%, list=17%, signal=28%
GOBP_CATECHOL_CONTAINING_COMPOUND_METABOLIC_PROCESS	GOBP_CATECHOL_CONTAINING_COMPOUND_METABOLIC_PROCESS	51	0.515728	1.41009	0.0394191	0.154347	1	3129	tags=41%, list=20%, signal=52%
GOBP_NEGATIVE_REGULATION_OF_LYMPHOCYTE_DIFFERENTIATION	GOBP_NEGATIVE_REGULATION_OF_LYMPHOCYTE_DIFFERENTIATION	50	0.475439	1.41005	0.0879346	0.154272	1	3075	tags=38%, list=20%, signal=47%
GOBP_REGULATION_OF_SIGNALING_RECEPTOR_ACTIVITY	GOBP_REGULATION_OF_SIGNALING_RECEPTOR_ACTIVITY	147	0.428276	1.40993	0.0253906	0.15426	1	3129	tags=28%, list=20%, signal=35%
GOBP_NEGATIVE_REGULATION_OF_MONONUCLEAR_CELL_MIGRATION	GOBP_NEGATIVE_REGULATION_OF_MONONUCLEAR_CELL_MIGRATION	16	0.613048	1.4099	0.067623	0.154166	1	3652	tags=69%, list=24%, signal=90%
GOBP_POSITIVE_REGULATION_OF_MEMBRANE_POTENTIAL	GOBP_POSITIVE_REGULATION_OF_MEMBRANE_POTENTIAL	15	0.49681	1.40971	0.0903491	0.154209	1	600	tags=13%, list=4%, signal=14%
GOBP_REGULATION_OF_MEMBRANE_LIPID_DISTRIBUTION	GOBP_REGULATION_OF_MEMBRANE_LIPID_DISTRIBUTION	55	0.448364	1.40967	0.055666	0.154141	1	3013	tags=33%, list=20%, signal=41%
GOBP_ORGAN_GROWTH	GOBP_ORGAN_GROWTH	148	0.431865	1.40965	0.0344828	0.154043	1	4214	tags=42%, list=27%, signal=57%
GOBP_PHOSPHATIDYLINOSITOL_BIOSYNTHETIC_PROCESS	GOBP_PHOSPHATIDYLINOSITOL_BIOSYNTHETIC_PROCESS	121	0.317056	1.40844	0.0518672	0.155076	1	4906	tags=39%, list=32%, signal=57%
GOBP_CELL_CELL_SIGNALING_INVOLVED_IN_CARDIAC_CONDUCTION	GOBP_CELL_CELL_SIGNALING_INVOLVED_IN_CARDIAC_CONDUCTION	30	0.594158	1.40836	0.0773931	0.155022	1	2387	tags=40%, list=16%, signal=47%
GOBP_NEGATIVE_REGULATION_OF_EPITHELIAL_CELL_DIFFERENTIATION	GOBP_NEGATIVE_REGULATION_OF_EPITHELIAL_CELL_DIFFERENTIATION	44	0.479082	1.40787	0.0720165	0.155323	1	4037	tags=43%, list=26%, signal=58%
GOBP_GLYCEROPHOSPHOLIPID_CATABOLIC_PROCESS	GOBP_GLYCEROPHOSPHOLIPID_CATABOLIC_PROCESS	30	0.519533	1.40778	0.0649606	0.155285	1	3438	tags=47%, list=22%, signal=60%
GOBP_ACTIN_FILAMENT_BASED_TRANSPORT	GOBP_ACTIN_FILAMENT_BASED_TRANSPORT	20	0.50702	1.4077	0.0951456	0.155244	1	5452	tags=50%, list=36%, signal=77%
GOBP_NEGATIVE_REGULATION_OF_PEPTIDYL_TYROSINE_PHOSPHORYLATION	GOBP_NEGATIVE_REGULATION_OF_PEPTIDYL_TYROSINE_PHOSPHORYLATION	48	0.400711	1.40718	0.0965092	0.155652	1	4832	tags=50%, list=31%, signal=73%
GOBP_NEGATIVE_REGULATION_OF_TUMOR_NECROSIS_FACTOR_MEDIATED_SIGNALING_PATHWAY	GOBP_NEGATIVE_REGULATION_OF_TUMOR_NECROSIS_FACTOR_MEDIATED_SIGNALING_PATHWAY	21	0.521803	1.40718	0.0973282	0.155545	1	2422	tags=29%, list=16%, signal=34%
GOBP_REGULATION_OF_PROTEIN_KINASE_C_SIGNALING	GOBP_REGULATION_OF_PROTEIN_KINASE_C_SIGNALING	16	0.54511	1.40676	0.0718686	0.155784	1	3899	tags=56%, list=25%, signal=75%
GOBP_LYMPHOID_PROGENITOR_CELL_DIFFERENTIATION	GOBP_LYMPHOID_PROGENITOR_CELL_DIFFERENTIATION	22	0.499354	1.40631	0.0762887	0.156092	1	1875	tags=23%, list=12%, signal=26%
GOBP_ADENYLATE_CYCLASE_MODULATING_G_PROTEIN_COUPLED_RECEPTOR_SIGNALING_PATHWAY	GOBP_ADENYLATE_CYCLASE_MODULATING_G_PROTEIN_COUPLED_RECEPTOR_SIGNALING_PATHWAY	211	0.448054	1.40615	0.0159046	0.156141	1	2946	tags=32%, list=19%, signal=39%
GOBP_POSITIVE_REGULATION_OF_ORGANELLE_ORGANIZATION	GOBP_POSITIVE_REGULATION_OF_ORGANELLE_ORGANIZATION	436	0.310651	1.40558	0.0338645	0.156606	1	2991	tags=20%, list=19%, signal=24%
GOBP_GRANULOCYTE_MACROPHAGE_COLONY_STIMULATING_FACTOR_PRODUCTION	GOBP_GRANULOCYTE_MACROPHAGE_COLONY_STIMULATING_FACTOR_PRODUCTION	17	0.634942	1.40535	0.0621359	0.156721	1	2468	tags=59%, list=16%, signal=70%
GOBP_SKELETAL_MUSCLE_CELL_DIFFERENTIATION	GOBP_SKELETAL_MUSCLE_CELL_DIFFERENTIATION	58	0.475501	1.40487	0.0532319	0.157113	1	2172	tags=26%, list=14%, signal=30%
GOBP_NEUROMUSCULAR_SYNAPTIC_TRANSMISSION	GOBP_NEUROMUSCULAR_SYNAPTIC_TRANSMISSION	24	0.538781	1.40429	0.06	0.157566	1	3274	tags=46%, list=21%, signal=58%
GOBP_COPULATION	GOBP_COPULATION	22	0.619331	1.4042	0.0387597	0.157537	1	910	tags=32%, list=6%, signal=34%
GOBP_NEGATIVE_REGULATION_OF_LIPID_STORAGE	GOBP_NEGATIVE_REGULATION_OF_LIPID_STORAGE	20	0.561089	1.40368	0.0910931	0.157959	1	4197	tags=55%, list=27%, signal=76%
GOBP_CELLULAR_RESPONSE_TO_THYROID_HORMONE_STIMULUS	GOBP_CELLULAR_RESPONSE_TO_THYROID_HORMONE_STIMULUS	16	0.513014	1.40348	0.0876827	0.158024	1	2658	tags=38%, list=17%, signal=45%
GOBP_GLIAL_CELL_DEVELOPMENT	GOBP_GLIAL_CELL_DEVELOPMENT	102	0.468335	1.40347	0.0536398	0.157927	1	3977	tags=40%, list=26%, signal=54%
GOBP_EXPLORATION_BEHAVIOR	GOBP_EXPLORATION_BEHAVIOR	24	0.604238	1.40338	0.0501931	0.157888	1	2132	tags=38%, list=14%, signal=43%
GOBP_BRANCHING_MORPHOGENESIS_OF_AN_EPITHELIAL_TUBE	GOBP_BRANCHING_MORPHOGENESIS_OF_AN_EPITHELIAL_TUBE	148	0.438018	1.40321	0.0304878	0.157926	1	3385	tags=35%, list=22%, signal=45%
GOBP_REGULATION_OF_TRANSLATION_IN_RESPONSE_TO_STRESS	GOBP_REGULATION_OF_TRANSLATION_IN_RESPONSE_TO_STRESS	20	0.36566	1.40317	0.138728	0.157855	1	4247	tags=25%, list=28%, signal=35%
GOBP_STRIATED_MUSCLE_CELL_DIFFERENTIATION	GOBP_STRIATED_MUSCLE_CELL_DIFFERENTIATION	243	0.410135	1.40312	0.0346821	0.15779	1	3627	tags=33%, list=24%, signal=42%
GOBP_REGULATION_OF_SYNAPSE_ASSEMBLY	GOBP_REGULATION_OF_SYNAPSE_ASSEMBLY	92	0.511115	1.40299	0.0396975	0.157793	1	3416	tags=35%, list=22%, signal=44%
GOBP_HYDROGEN_PEROXIDE_BIOSYNTHETIC_PROCESS	GOBP_HYDROGEN_PEROXIDE_BIOSYNTHETIC_PROCESS	16	0.642687	1.40278	0.104294	0.157889	1	2825	tags=44%, list=18%, signal=54%
GOBP_REGULATION_OF_PH	GOBP_REGULATION_OF_PH	83	0.411335	1.40242	0.05	0.158154	1	3629	tags=35%, list=24%, signal=46%
GOBP_REGULATION_OF_ENDOCYTIC_RECYCLING	GOBP_REGULATION_OF_ENDOCYTIC_RECYCLING	15	0.584928	1.40216	0.0953307	0.158298	1	5939	tags=73%, list=39%, signal=119%
GOBP_NEGATIVE_REGULATION_OF_NEURAL_PRECURSOR_CELL_PROLIFERATION	GOBP_NEGATIVE_REGULATION_OF_NEURAL_PRECURSOR_CELL_PROLIFERATION	19	0.547201	1.40149	0.0857143	0.158789	1	2953	tags=37%, list=19%, signal=46%
GOBP_NEGATIVE_REGULATION_OF_OSTEOBLAST_DIFFERENTIATION	GOBP_NEGATIVE_REGULATION_OF_OSTEOBLAST_DIFFERENTIATION	42	0.53957	1.40069	0.0753564	0.159468	1	3977	tags=45%, list=26%, signal=61%
GOBP_EPITHELIAL_TO_MESENCHYMAL_TRANSITION	GOBP_EPITHELIAL_TO_MESENCHYMAL_TRANSITION	148	0.428507	1.40029	0.063655	0.159716	1	4826	tags=49%, list=31%, signal=71%
GOBP_REGULATION_OF_CELL_SIZE	GOBP_REGULATION_OF_CELL_SIZE	168	0.377674	1.40013	0.0397727	0.159756	1	3631	tags=29%, list=24%, signal=38%
GOBP_POSITIVE_REGULATION_OF_NEURON_DEATH	GOBP_POSITIVE_REGULATION_OF_NEURON_DEATH	80	0.403693	1.3998	0.0577689	0.159952	1	3538	tags=36%, list=23%, signal=47%
GOBP_RESPONSE_TO_MITOCHONDRIAL_DEPOLARISATION	GOBP_RESPONSE_TO_MITOCHONDRIAL_DEPOLARISATION	15	0.409638	1.39978	0.11753	0.159864	1	6301	tags=53%, list=41%, signal=90%
GOBP_RESPONSE_TO_OSMOTIC_STRESS	GOBP_RESPONSE_TO_OSMOTIC_STRESS	78	0.399874	1.39938	0.0513347	0.160121	1	4375	tags=41%, list=28%, signal=57%
GOBP_PHOSPHOLIPID_CATABOLIC_PROCESS	GOBP_PHOSPHOLIPID_CATABOLIC_PROCESS	48	0.47224	1.39888	0.0744275	0.160506	1	3441	tags=44%, list=22%, signal=56%
GOBP_MAMMARY_GLAND_DUCT_MORPHOGENESIS	GOBP_MAMMARY_GLAND_DUCT_MORPHOGENESIS	29	0.524248	1.39886	0.0934394	0.160417	1	4037	tags=55%, list=26%, signal=75%
GOBP_FLUID_TRANSPORT	GOBP_FLUID_TRANSPORT	32	0.578808	1.39879	0.0572034	0.160386	1	3287	tags=44%, list=21%, signal=56%
GOBP_RESPONSE_TO_OXYGEN_LEVELS	GOBP_RESPONSE_TO_OXYGEN_LEVELS	291	0.370856	1.39858	0.0339321	0.160465	1	3397	tags=29%, list=22%, signal=36%
GOBP_MACROAUTOPHAGY	GOBP_MACROAUTOPHAGY	279	0.223326	1.39849	0.0861345	0.160442	1	5373	tags=27%, list=35%, signal=41%
GOBP_MATERNAL_PROCESS_INVOLVED_IN_FEMALE_PREGNANCY	GOBP_MATERNAL_PROCESS_INVOLVED_IN_FEMALE_PREGNANCY	55	0.453442	1.3983	0.0444874	0.160507	1	3936	tags=42%, list=26%, signal=56%
GOBP_NEGATIVE_REGULATION_OF_SMALL_MOLECULE_METABOLIC_PROCESS	GOBP_NEGATIVE_REGULATION_OF_SMALL_MOLECULE_METABOLIC_PROCESS	83	0.40626	1.39816	0.0323887	0.160539	1	3882	tags=30%, list=25%, signal=40%
GOBP_PEPTIDYL_SERINE_MODIFICATION	GOBP_PEPTIDYL_SERINE_MODIFICATION	309	0.325967	1.39809	0.018	0.16049	1	3790	tags=28%, list=25%, signal=36%
GOBP_COMPLEMENT_ACTIVATION_ALTERNATIVE_PATHWAY	GOBP_COMPLEMENT_ACTIVATION_ALTERNATIVE_PATHWAY	16	0.691102	1.39756	0.076	0.160865	1	2249	tags=63%, list=15%, signal=73%
GOBP_REGULATION_OF_CALCIUM_ION_IMPORT	GOBP_REGULATION_OF_CALCIUM_ION_IMPORT	38	0.506702	1.39736	0.0489237	0.160929	1	2083	tags=34%, list=14%, signal=39%
GOBP_POSITIVE_REGULATION_OF_ACTIN_NUCLEATION	GOBP_POSITIVE_REGULATION_OF_ACTIN_NUCLEATION	15	0.511145	1.39716	0.115385	0.161024	1	4714	tags=53%, list=31%, signal=77%
GOBP_DICARBOXYLIC_ACID_CATABOLIC_PROCESS	GOBP_DICARBOXYLIC_ACID_CATABOLIC_PROCESS	18	0.56276	1.39683	0.0652174	0.161242	1	1171	tags=17%, list=8%, signal=18%
GOBP_GLOMERULAR_MESANGIUM_DEVELOPMENT	GOBP_GLOMERULAR_MESANGIUM_DEVELOPMENT	16	0.609533	1.39656	0.0875764	0.161425	1	3295	tags=56%, list=21%, signal=72%
GOBP_PLASMA_LIPOPROTEIN_PARTICLE_CLEARANCE	GOBP_PLASMA_LIPOPROTEIN_PARTICLE_CLEARANCE	39	0.531301	1.39599	0.0729367	0.161846	1	4260	tags=51%, list=28%, signal=71%
GOBP_REGULATION_OF_MEMBRANE_REPOLARIZATION	GOBP_REGULATION_OF_MEMBRANE_REPOLARIZATION	31	0.561928	1.39598	0.0870445	0.161739	1	2387	tags=35%, list=16%, signal=42%
GOBP_REGULATION_OF_POTASSIUM_ION_TRANSMEMBRANE_TRANSPORTER_ACTIVITY	GOBP_REGULATION_OF_POTASSIUM_ION_TRANSMEMBRANE_TRANSPORTER_ACTIVITY	53	0.48946	1.39589	0.0454545	0.161717	1	2400	tags=32%, list=16%, signal=38%
GOBP_POSITIVE_REGULATION_OF_ACUTE_INFLAMMATORY_RESPONSE	GOBP_POSITIVE_REGULATION_OF_ACUTE_INFLAMMATORY_RESPONSE	24	0.63559	1.39585	0.0808679	0.161655	1	2355	tags=54%, list=15%, signal=64%
GOBP_NEGATIVE_REGULATION_OF_CELLULAR_RESPONSE_TO_INSULIN_STIMULUS	GOBP_NEGATIVE_REGULATION_OF_CELLULAR_RESPONSE_TO_INSULIN_STIMULUS	32	0.443681	1.39566	0.0697211	0.161742	1	4645	tags=47%, list=30%, signal=67%
GOBP_NEGATIVE_REGULATION_OF_STEM_CELL_DIFFERENTIATION	GOBP_NEGATIVE_REGULATION_OF_STEM_CELL_DIFFERENTIATION	21	0.410735	1.39542	0.117417	0.161883	1	4534	tags=33%, list=30%, signal=47%
GOBP_REGULATION_OF_LIPID_TRANSPORT	GOBP_REGULATION_OF_LIPID_TRANSPORT	127	0.43083	1.39479	0.019685	0.162372	1	3207	tags=33%, list=21%, signal=41%
GOBP_REGULATION_OF_T_HELPER_17_CELL_DIFFERENTIATION	GOBP_REGULATION_OF_T_HELPER_17_CELL_DIFFERENTIATION	17	0.62607	1.39475	0.0863454	0.162293	1	4188	tags=65%, list=27%, signal=89%
GOBP_ENDOTHELIAL_CELL_CHEMOTAXIS	GOBP_ENDOTHELIAL_CELL_CHEMOTAXIS	26	0.539103	1.39435	0.0836653	0.162572	1	3288	tags=42%, list=21%, signal=54%
GOBP_REGULATION_OF_ENDOTHELIAL_CELL_CHEMOTAXIS	GOBP_REGULATION_OF_ENDOTHELIAL_CELL_CHEMOTAXIS	20	0.562472	1.3942	0.0783133	0.162608	1	2991	tags=45%, list=19%, signal=56%
GOBP_POSITIVE_REGULATION_OF_TRIGLYCERIDE_METABOLIC_PROCESS	GOBP_POSITIVE_REGULATION_OF_TRIGLYCERIDE_METABOLIC_PROCESS	21	0.569176	1.39385	0.0910853	0.162866	1	2064	tags=33%, list=13%, signal=38%
GOBP_ACTIN_MEDIATED_CELL_CONTRACTION	GOBP_ACTIN_MEDIATED_CELL_CONTRACTION	95	0.480796	1.3937	0.0435644	0.1629	1	2531	tags=33%, list=16%, signal=39%
GOBP_NEGATIVE_REGULATION_OF_LYMPHOCYTE_APOPTOTIC_PROCESS	GOBP_NEGATIVE_REGULATION_OF_LYMPHOCYTE_APOPTOTIC_PROCESS	31	0.504406	1.39309	0.0731707	0.163426	1	3519	tags=45%, list=23%, signal=58%
GOBP_DNA_CATABOLIC_PROCESS	GOBP_DNA_CATABOLIC_PROCESS	29	0.464408	1.39284	0.0914761	0.16353	1	772	tags=10%, list=5%, signal=11%
GOBP_ANTIVIRAL_INNATE_IMMUNE_RESPONSE	GOBP_ANTIVIRAL_INNATE_IMMUNE_RESPONSE	16	0.549302	1.39256	0.133603	0.163707	1	3900	tags=56%, list=25%, signal=75%
GOBP_POSITIVE_REGULATION_OF_SYNAPTIC_TRANSMISSION	GOBP_POSITIVE_REGULATION_OF_SYNAPTIC_TRANSMISSION	140	0.463964	1.39252	0.0292969	0.163631	1	3096	tags=33%, list=20%, signal=41%
GOBP_POSITIVE_REGULATION_OF_MUSCLE_CELL_APOPTOTIC_PROCESS	GOBP_POSITIVE_REGULATION_OF_MUSCLE_CELL_APOPTOTIC_PROCESS	23	0.536057	1.39195	0.0704225	0.164064	1	2585	tags=30%, list=17%, signal=37%
GOBP_INFLAMMATORY_CELL_APOPTOTIC_PROCESS	GOBP_INFLAMMATORY_CELL_APOPTOTIC_PROCESS	19	0.566042	1.39194	0.0976096	0.163963	1	2373	tags=42%, list=15%, signal=50%
GOBP_REGULATION_OF_G_PROTEIN_COUPLED_RECEPTOR_SIGNALING_PATHWAY	GOBP_REGULATION_OF_G_PROTEIN_COUPLED_RECEPTOR_SIGNALING_PATHWAY	124	0.427505	1.39184	0.0408998	0.163963	1	4357	tags=44%, list=28%, signal=60%
GOBP_REGULATION_OF_EXCRETION	GOBP_REGULATION_OF_EXCRETION	21	0.560802	1.39174	0.0670732	0.163963	1	2736	tags=38%, list=18%, signal=46%
GOBP_REGULATION_OF_OSSIFICATION	GOBP_REGULATION_OF_OSSIFICATION	107	0.467553	1.39171	0.0464646	0.163883	1	3883	tags=43%, list=25%, signal=57%
GOBP_ANIMAL_ORGAN_FORMATION	GOBP_ANIMAL_ORGAN_FORMATION	63	0.5045	1.39166	0.0665281	0.163827	1	3471	tags=44%, list=23%, signal=57%
GOBP_3_UTR_MEDIATED_MRNA_STABILIZATION	GOBP_3_UTR_MEDIATED_MRNA_STABILIZATION	17	0.502307	1.39146	0.111538	0.163926	1	3098	tags=29%, list=20%, signal=37%
GOBP_NEGATIVE_REGULATION_OF_FAT_CELL_DIFFERENTIATION	GOBP_NEGATIVE_REGULATION_OF_FAT_CELL_DIFFERENTIATION	47	0.441457	1.39106	0.0963115	0.164179	1	4753	tags=51%, list=31%, signal=74%
GOBP_VASCULAR_ASSOCIATED_SMOOTH_MUSCLE_CONTRACTION	GOBP_VASCULAR_ASSOCIATED_SMOOTH_MUSCLE_CONTRACTION	24	0.559258	1.39044	0.0727969	0.164697	1	2516	tags=38%, list=16%, signal=45%
GOBP_LOW_DENSITY_LIPOPROTEIN_PARTICLE_CLEARANCE	GOBP_LOW_DENSITY_LIPOPROTEIN_PARTICLE_CLEARANCE	27	0.53725	1.39019	0.0756972	0.164866	1	4493	tags=52%, list=29%, signal=73%
GOBP_LIPID_LOCALIZATION	GOBP_LIPID_LOCALIZATION	403	0.395654	1.39014	0.0134615	0.164808	1	3320	tags=30%, list=22%, signal=37%
GOBP_RESPONSE_TO_TEMPERATURE_STIMULUS	GOBP_RESPONSE_TO_TEMPERATURE_STIMULUS	164	0.369466	1.38998	0.0321932	0.164867	1	4277	tags=30%, list=28%, signal=42%
GOBP_POSITIVE_REGULATION_OF_DEVELOPMENTAL_GROWTH	GOBP_POSITIVE_REGULATION_OF_DEVELOPMENTAL_GROWTH	149	0.40796	1.38985	0.0389864	0.164891	1	3580	tags=32%, list=23%, signal=42%
GOBP_POSITIVE_REGULATION_OF_SYNAPTIC_TRANSMISSION_GLUTAMATERGIC	GOBP_POSITIVE_REGULATION_OF_SYNAPTIC_TRANSMISSION_GLUTAMATERGIC	27	0.578294	1.38971	0.0885827	0.164928	1	3377	tags=48%, list=22%, signal=62%
GOBP_REGULATION_OF_RECEPTOR_RECYCLING	GOBP_REGULATION_OF_RECEPTOR_RECYCLING	20	0.518718	1.38919	0.0752033	0.165364	1	1646	tags=20%, list=11%, signal=22%
GOBP_POSITIVE_REGULATION_OF_SMOOTH_MUSCLE_CONTRACTION	GOBP_POSITIVE_REGULATION_OF_SMOOTH_MUSCLE_CONTRACTION	27	0.547012	1.38883	0.0502008	0.165619	1	3363	tags=44%, list=22%, signal=57%
GOBP_REGULATION_OF_DEVELOPMENTAL_GROWTH	GOBP_REGULATION_OF_DEVELOPMENTAL_GROWTH	294	0.396351	1.38866	0.0251938	0.165704	1	3710	tags=34%, list=24%, signal=44%
GOBP_VASCULAR_TRANSPORT	GOBP_VASCULAR_TRANSPORT	86	0.479335	1.38859	0.05	0.165658	1	3497	tags=38%, list=23%, signal=49%
GOBP_HISTAMINE_TRANSPORT	GOBP_HISTAMINE_TRANSPORT	15	0.581765	1.38837	0.0943026	0.165766	1	393	tags=20%, list=3%, signal=21%
GOBP_DEFENSE_RESPONSE_TO_GRAM_NEGATIVE_BACTERIUM	GOBP_DEFENSE_RESPONSE_TO_GRAM_NEGATIVE_BACTERIUM	66	0.517797	1.38818	0.0414201	0.165828	1	2707	tags=39%, list=18%, signal=48%
GOBP_NEGATIVE_REGULATION_OF_HYDROLASE_ACTIVITY	GOBP_NEGATIVE_REGULATION_OF_HYDROLASE_ACTIVITY	316	0.400237	1.3878	0.0261044	0.166078	1	3353	tags=32%, list=22%, signal=40%
GOBP_CARDIAC_CHAMBER_DEVELOPMENT	GOBP_CARDIAC_CHAMBER_DEVELOPMENT	161	0.426016	1.38755	0.0515464	0.166205	1	3440	tags=37%, list=22%, signal=47%
GOBP_REGULATION_OF_WOUND_HEALING	GOBP_REGULATION_OF_WOUND_HEALING	120	0.48072	1.38752	0.0309278	0.166122	1	3148	tags=40%, list=20%, signal=50%
GOBP_ACTIVATION_OF_PROTEIN_KINASE_ACTIVITY	GOBP_ACTIVATION_OF_PROTEIN_KINASE_ACTIVITY	132	0.372867	1.38713	0.0168067	0.166404	1	3795	tags=34%, list=25%, signal=45%
GOBP_RESPONSE_TO_HEAT	GOBP_RESPONSE_TO_HEAT	98	0.366196	1.38706	0.0382294	0.16636	1	2532	tags=17%, list=16%, signal=21%
GOBP_EPITHELIAL_TUBE_MORPHOGENESIS	GOBP_EPITHELIAL_TUBE_MORPHOGENESIS	318	0.383622	1.38682	0.032	0.166458	1	3610	tags=32%, list=24%, signal=41%
GOBP_MAMMARY_GLAND_EPITHELIAL_CELL_DIFFERENTIATION	GOBP_MAMMARY_GLAND_EPITHELIAL_CELL_DIFFERENTIATION	18	0.56578	1.3868	0.0914513	0.166367	1	3052	tags=39%, list=20%, signal=48%
GOBP_VASOCONSTRICTION	GOBP_VASOCONSTRICTION	79	0.51202	1.38663	0.0652174	0.166412	1	2516	tags=33%, list=16%, signal=39%
GOBP_LIPID_STORAGE	GOBP_LIPID_STORAGE	75	0.422375	1.38661	0.0666667	0.166339	1	5167	tags=51%, list=34%, signal=76%
GOBP_PROTEIN_HOMOTETRAMERIZATION	GOBP_PROTEIN_HOMOTETRAMERIZATION	56	0.423994	1.38636	0.0564854	0.166438	1	2539	tags=27%, list=17%, signal=32%
GOBP_MUSCLE_CELL_DEVELOPMENT	GOBP_MUSCLE_CELL_DEVELOPMENT	162	0.438817	1.38598	0.0524272	0.166733	1	3452	tags=35%, list=22%, signal=45%
GOBP_CALCIUM_ION_IMPORT	GOBP_CALCIUM_ION_IMPORT	72	0.453454	1.38594	0.0470588	0.166654	1	3785	tags=38%, list=25%, signal=50%
GOBP_IMMUNE_RESPONSE_TO_TUMOR_CELL	GOBP_IMMUNE_RESPONSE_TO_TUMOR_CELL	21	0.622819	1.38586	0.119608	0.166619	1	1971	tags=48%, list=13%, signal=55%
GOBP_NEGATIVE_REGULATION_OF_PROTEIN_LOCALIZATION_TO_MEMBRANE	GOBP_NEGATIVE_REGULATION_OF_PROTEIN_LOCALIZATION_TO_MEMBRANE	29	0.449504	1.38577	0.0968379	0.166594	1	6059	tags=66%, list=39%, signal=108%
GOBP_PLASMA_MEMBRANE_ORGANIZATION	GOBP_PLASMA_MEMBRANE_ORGANIZATION	133	0.371983	1.38568	0.0266393	0.166578	1	3554	tags=31%, list=23%, signal=40%
GOBP_ENDOPLASMIC_RETICULUM_ORGANIZATION	GOBP_ENDOPLASMIC_RETICULUM_ORGANIZATION	69	0.334411	1.38562	0.0784314	0.166533	1	2995	tags=13%, list=20%, signal=16%
GOBP_REGULATION_OF_MUSCLE_CELL_DIFFERENTIATION	GOBP_REGULATION_OF_MUSCLE_CELL_DIFFERENTIATION	118	0.399146	1.38487	0.0535714	0.167168	1	3627	tags=31%, list=24%, signal=41%
GOBP_NEGATIVE_REGULATION_OF_DEVELOPMENTAL_GROWTH	GOBP_NEGATIVE_REGULATION_OF_DEVELOPMENTAL_GROWTH	98	0.450883	1.38454	0.0543689	0.16739	1	3710	tags=46%, list=24%, signal=60%
GOBP_BONE_REMODELING	GOBP_BONE_REMODELING	84	0.45461	1.38407	0.0528376	0.167733	1	3794	tags=46%, list=25%, signal=61%
GOBP_REGULATION_OF_PROTEIN_AUTOPHOSPHORYLATION	GOBP_REGULATION_OF_PROTEIN_AUTOPHOSPHORYLATION	39	0.44746	1.38368	0.0828283	0.167989	1	3276	tags=36%, list=21%, signal=46%
GOBP_PROTEIN_HOMOOLIGOMERIZATION	GOBP_PROTEIN_HOMOOLIGOMERIZATION	180	0.35814	1.38338	0.0183299	0.168194	1	3083	tags=26%, list=20%, signal=32%
GOBP_POSITIVE_REGULATION_OF_LIPID_TRANSPORT	GOBP_POSITIVE_REGULATION_OF_LIPID_TRANSPORT	83	0.45804	1.38278	0.0361905	0.168665	1	3186	tags=37%, list=21%, signal=47%
GOBP_SUBSTRATE_DEPENDENT_CELL_MIGRATION	GOBP_SUBSTRATE_DEPENDENT_CELL_MIGRATION	23	0.500001	1.38222	0.0886076	0.169122	1	3756	tags=35%, list=24%, signal=46%
GOBP_POSITIVE_REGULATION_OF_PROTEASOMAL_UBIQUITIN_DEPENDENT_PROTEIN_CATABOLIC_PROCESS	GOBP_POSITIVE_REGULATION_OF_PROTEASOMAL_UBIQUITIN_DEPENDENT_PROTEIN_CATABOLIC_PROCESS	83	0.299793	1.38147	0.0730223	0.169757	1	2005	tags=13%, list=13%, signal=15%
GOBP_CELL_JUNCTION_ASSEMBLY	GOBP_CELL_JUNCTION_ASSEMBLY	392	0.415013	1.38054	0.0479846	0.170609	1	3856	tags=36%, list=25%, signal=47%
GOBP_NEGATIVE_REGULATION_OF_RESPONSE_TO_OXIDATIVE_STRESS	GOBP_NEGATIVE_REGULATION_OF_RESPONSE_TO_OXIDATIVE_STRESS	18	0.547354	1.38044	0.0791075	0.170593	1	1378	tags=33%, list=9%, signal=37%
GOBP_SARCOMERE_ORGANIZATION	GOBP_SARCOMERE_ORGANIZATION	41	0.537412	1.38026	0.0710059	0.170648	1	2516	tags=29%, list=16%, signal=35%
GOBP_PROTEIN_LIPID_COMPLEX_SUBUNIT_ORGANIZATION	GOBP_PROTEIN_LIPID_COMPLEX_SUBUNIT_ORGANIZATION	48	0.51862	1.38022	0.0644531	0.170562	1	4501	tags=56%, list=29%, signal=79%
GOBP_TRANSMEMBRANE_RECEPTOR_PROTEIN_SERINE_THREONINE_KINASE_SIGNALING_PATHWAY	GOBP_TRANSMEMBRANE_RECEPTOR_PROTEIN_SERINE_THREONINE_KINASE_SIGNALING_PATHWAY	332	0.386085	1.38007	0.0344828	0.17059	1	3419	tags=29%, list=22%, signal=36%
GOBP_MAMMARY_GLAND_EPITHELIUM_DEVELOPMENT	GOBP_MAMMARY_GLAND_EPITHELIUM_DEVELOPMENT	64	0.448259	1.37982	0.0547667	0.170726	1	3136	tags=36%, list=20%, signal=45%
GOBP_REGULATION_OF_PEPTIDYL_LYSINE_ACETYLATION	GOBP_REGULATION_OF_PEPTIDYL_LYSINE_ACETYLATION	69	0.362903	1.37961	0.0507099	0.170825	1	2942	tags=23%, list=19%, signal=29%
GOBP_POSITIVE_REGULATION_OF_PROTEIN_CONTAINING_COMPLEX_DISASSEMBLY	GOBP_POSITIVE_REGULATION_OF_PROTEIN_CONTAINING_COMPLEX_DISASSEMBLY	26	0.52415	1.37937	0.097166	0.170932	1	2708	tags=35%, list=18%, signal=42%
GOBP_POSITIVE_REGULATION_OF_RELEASE_OF_SEQUESTERED_CALCIUM_ION_INTO_CYTOSOL	GOBP_POSITIVE_REGULATION_OF_RELEASE_OF_SEQUESTERED_CALCIUM_ION_INTO_CYTOSOL	36	0.530931	1.37936	0.0551181	0.170823	1	3361	tags=50%, list=22%, signal=64%
GOBP_REGULATION_OF_SMALL_MOLECULE_METABOLIC_PROCESS	GOBP_REGULATION_OF_SMALL_MOLECULE_METABOLIC_PROCESS	296	0.361103	1.37864	0.0349515	0.171439	1	3810	tags=28%, list=25%, signal=37%
GOBP_REGULATION_OF_LIPID_STORAGE	GOBP_REGULATION_OF_LIPID_STORAGE	49	0.455167	1.37855	0.0791667	0.171404	1	5398	tags=59%, list=35%, signal=91%
GOBP_PATHWAY_RESTRICTED_SMAD_PROTEIN_PHOSPHORYLATION	GOBP_PATHWAY_RESTRICTED_SMAD_PROTEIN_PHOSPHORYLATION	62	0.471682	1.37701	0.0484848	0.172931	1	2986	tags=40%, list=19%, signal=50%
GOBP_CYTOPLASMIC_MICROTUBULE_ORGANIZATION	GOBP_CYTOPLASMIC_MICROTUBULE_ORGANIZATION	53	0.35836	1.37688	0.119843	0.172942	1	4449	tags=34%, list=29%, signal=48%
GOBP_EPITHELIAL_CELL_DEVELOPMENT	GOBP_EPITHELIAL_CELL_DEVELOPMENT	199	0.389127	1.37677	0.0338645	0.172932	1	3905	tags=35%, list=25%, signal=47%
GOBP_SENSORY_PERCEPTION_OF_PAIN	GOBP_SENSORY_PERCEPTION_OF_PAIN	88	0.491363	1.37658	0.0275049	0.173003	1	2567	tags=42%, list=17%, signal=50%
GOBP_NEGATIVE_REGULATION_OF_NEURON_DEATH	GOBP_NEGATIVE_REGULATION_OF_NEURON_DEATH	188	0.381665	1.37471	0.0295858	0.17477	1	3187	tags=27%, list=21%, signal=34%
GOBP_RAB_PROTEIN_SIGNAL_TRANSDUCTION	GOBP_RAB_PROTEIN_SIGNAL_TRANSDUCTION	19	0.478378	1.37445	0.123984	0.174949	1	4707	tags=47%, list=31%, signal=68%
GOBP_CERAMIDE_BIOSYNTHETIC_PROCESS	GOBP_CERAMIDE_BIOSYNTHETIC_PROCESS	60	0.412431	1.37373	0.0707269	0.175599	1	3441	tags=27%, list=22%, signal=34%
GOBP_MESENCHYMAL_CELL_DIFFERENTIATION	GOBP_MESENCHYMAL_CELL_DIFFERENTIATION	227	0.423371	1.37352	0.0569106	0.175696	1	3596	tags=37%, list=23%, signal=47%
GOBP_NEGATIVE_REGULATION_OF_CALCIUM_ION_TRANSPORT_INTO_CYTOSOL	GOBP_NEGATIVE_REGULATION_OF_CALCIUM_ION_TRANSPORT_INTO_CYTOSOL	16	0.571556	1.37275	0.0941884	0.176395	1	3225	tags=38%, list=21%, signal=47%
GOBP_ARF_PROTEIN_SIGNAL_TRANSDUCTION	GOBP_ARF_PROTEIN_SIGNAL_TRANSDUCTION	19	0.448313	1.37261	0.133595	0.176414	1	4623	tags=47%, list=30%, signal=68%
GOBP_REGULATION_OF_B_CELL_DIFFERENTIATION	GOBP_REGULATION_OF_B_CELL_DIFFERENTIATION	30	0.574272	1.37229	0.121032	0.176607	1	3055	tags=57%, list=20%, signal=71%
GOBP_CARDIAC_MUSCLE_CELL_CONTRACTION	GOBP_CARDIAC_MUSCLE_CELL_CONTRACTION	68	0.497827	1.37229	0.0704225	0.176491	1	2452	tags=35%, list=16%, signal=42%
GOBP_POSITIVE_REGULATION_OF_SIGNAL_TRANSDUCTION_BY_P53_CLASS_MEDIATOR	GOBP_POSITIVE_REGULATION_OF_SIGNAL_TRANSDUCTION_BY_P53_CLASS_MEDIATOR	25	0.439828	1.37228	0.116	0.176391	1	4710	tags=36%, list=31%, signal=52%
GOBP_REGULATION_OF_TOLL_LIKE_RECEPTOR_4_SIGNALING_PATHWAY	GOBP_REGULATION_OF_TOLL_LIKE_RECEPTOR_4_SIGNALING_PATHWAY	20	0.558702	1.37206	0.115234	0.176491	1	4036	tags=55%, list=26%, signal=75%
GOBP_GLAND_MORPHOGENESIS	GOBP_GLAND_MORPHOGENESIS	119	0.443889	1.37203	0.0708661	0.176411	1	3288	tags=38%, list=21%, signal=48%
GOBP_STRIATED_MUSCLE_ADAPTATION	GOBP_STRIATED_MUSCLE_ADAPTATION	43	0.479588	1.37171	0.0690335	0.176637	1	3572	tags=33%, list=23%, signal=42%
GOBP_RENAL_SODIUM_EXCRETION	GOBP_RENAL_SODIUM_EXCRETION	19	0.559285	1.37165	0.0912698	0.176582	1	2736	tags=37%, list=18%, signal=45%
GOBP_MOTOR_NEURON_AXON_GUIDANCE	GOBP_MOTOR_NEURON_AXON_GUIDANCE	28	0.495105	1.37154	0.083499	0.176578	1	3730	tags=39%, list=24%, signal=52%
GOBP_OSTEOBLAST_DIFFERENTIATION	GOBP_OSTEOBLAST_DIFFERENTIATION	205	0.429223	1.37133	0.0661157	0.176672	1	3794	tags=35%, list=25%, signal=45%
GOBP_RETROGRADE_TRANSPORT_ENDOSOME_TO_GOLGI	GOBP_RETROGRADE_TRANSPORT_ENDOSOME_TO_GOLGI	76	0.272613	1.37104	0.121593	0.176838	1	974	tags=5%, list=6%, signal=6%
GOBP_MESENCHYME_DEVELOPMENT	GOBP_MESENCHYME_DEVELOPMENT	275	0.427294	1.37083	0.0599174	0.176924	1	3461	tags=36%, list=23%, signal=45%
GOBP_MEMORY	GOBP_MEMORY	115	0.448645	1.3707	0.0515267	0.176956	1	3617	tags=34%, list=24%, signal=44%
GOBP_POSITIVE_REGULATION_OF_MUSCLE_CELL_DIFFERENTIATION	GOBP_POSITIVE_REGULATION_OF_MUSCLE_CELL_DIFFERENTIATION	56	0.436789	1.37028	0.0626263	0.177282	1	3236	tags=34%, list=21%, signal=43%
GOBP_ERYTHROCYTE_DEVELOPMENT	GOBP_ERYTHROCYTE_DEVELOPMENT	33	0.438344	1.37026	0.0949495	0.177181	1	4368	tags=36%, list=28%, signal=51%
GOBP_SULFUR_COMPOUND_METABOLIC_PROCESS	GOBP_SULFUR_COMPOUND_METABOLIC_PROCESS	292	0.343604	1.3701	0.0226804	0.177219	1	3503	tags=26%, list=23%, signal=34%
GOBP_POSITIVE_REGULATION_OF_MONOOXYGENASE_ACTIVITY	GOBP_POSITIVE_REGULATION_OF_MONOOXYGENASE_ACTIVITY	30	0.493152	1.36993	0.0821643	0.17727	1	2756	tags=33%, list=18%, signal=41%
GOBP_NEGATIVE_REGULATION_OF_ANDROGEN_RECEPTOR_SIGNALING_PATHWAY	GOBP_NEGATIVE_REGULATION_OF_ANDROGEN_RECEPTOR_SIGNALING_PATHWAY	15	0.546694	1.3696	0.114458	0.177497	1	789	tags=13%, list=5%, signal=14%
GOBP_SECONDARY_PALATE_DEVELOPMENT	GOBP_SECONDARY_PALATE_DEVELOPMENT	24	0.552392	1.369	0.10241	0.178022	1	3258	tags=50%, list=21%, signal=63%
GOBP_REGULATION_OF_PROTEIN_ACETYLATION	GOBP_REGULATION_OF_PROTEIN_ACETYLATION	76	0.345567	1.36881	0.0565657	0.178105	1	2942	tags=21%, list=19%, signal=26%
GOBP_EMBRYONIC_HEART_TUBE_MORPHOGENESIS	GOBP_EMBRYONIC_HEART_TUBE_MORPHOGENESIS	66	0.402164	1.36806	0.0690335	0.178784	1	3851	tags=36%, list=25%, signal=48%
GOBP_VASODILATION	GOBP_VASODILATION	43	0.526456	1.36779	0.0747475	0.178971	1	1941	tags=37%, list=13%, signal=42%
GOBP_NEGATIVE_REGULATION_OF_PROTEIN_LOCALIZATION_TO_CELL_PERIPHERY	GOBP_NEGATIVE_REGULATION_OF_PROTEIN_LOCALIZATION_TO_CELL_PERIPHERY	25	0.475782	1.36765	0.101392	0.179009	1	6059	tags=72%, list=39%, signal=119%
GOBP_POSITIVE_REGULATION_OF_IMMUNOGLOBULIN_PRODUCTION	GOBP_POSITIVE_REGULATION_OF_IMMUNOGLOBULIN_PRODUCTION	44	0.493846	1.36761	0.134387	0.17893	1	4279	tags=50%, list=28%, signal=69%
GOBP_NEGATIVE_REGULATION_OF_ACTIN_FILAMENT_DEPOLYMERIZATION	GOBP_NEGATIVE_REGULATION_OF_ACTIN_FILAMENT_DEPOLYMERIZATION	37	0.462333	1.36718	0.120755	0.179248	1	4267	tags=54%, list=28%, signal=75%
GOBP_ORGANOPHOSPHATE_ESTER_TRANSPORT	GOBP_ORGANOPHOSPHATE_ESTER_TRANSPORT	131	0.375581	1.3665	0.0474308	0.179785	1	3091	tags=25%, list=20%, signal=31%
GOBP_CARDIAC_VENTRICLE_DEVELOPMENT	GOBP_CARDIAC_VENTRICLE_DEVELOPMENT	122	0.427335	1.36512	0.0731707	0.181125	1	3440	tags=36%, list=22%, signal=46%
GOBP_REGULATION_OF_FLAGELLATED_SPERM_MOTILITY	GOBP_REGULATION_OF_FLAGELLATED_SPERM_MOTILITY	15	0.601718	1.36475	0.0769231	0.181374	1	861	tags=20%, list=6%, signal=21%
GOBP_LIPID_CATABOLIC_PROCESS	GOBP_LIPID_CATABOLIC_PROCESS	292	0.369857	1.3647	0.026465	0.181311	1	3557	tags=29%, list=23%, signal=38%
GOBP_CELLULAR_RESPONSE_TO_ABIOTIC_STIMULUS	GOBP_CELLULAR_RESPONSE_TO_ABIOTIC_STIMULUS	296	0.325372	1.36426	0.0304878	0.181644	1	3757	tags=28%, list=24%, signal=37%
GOBP_ESTABLISHMENT_OF_PROTEIN_LOCALIZATION_TO_PLASMA_MEMBRANE	GOBP_ESTABLISHMENT_OF_PROTEIN_LOCALIZATION_TO_PLASMA_MEMBRANE	55	0.292847	1.36414	0.11002	0.181664	1	5652	tags=44%, list=37%, signal=69%
GOBP_NEGATIVE_REGULATION_OF_LIPID_CATABOLIC_PROCESS	GOBP_NEGATIVE_REGULATION_OF_LIPID_CATABOLIC_PROCESS	22	0.566417	1.36395	0.0962672	0.181751	1	2417	tags=50%, list=16%, signal=59%
GOBP_REGULATION_OF_ACTION_POTENTIAL	GOBP_REGULATION_OF_ACTION_POTENTIAL	49	0.461543	1.36377	0.0690335	0.181827	1	2387	tags=35%, list=16%, signal=41%
GOBP_POSITIVE_REGULATION_OF_HEART_RATE	GOBP_POSITIVE_REGULATION_OF_HEART_RATE	25	0.562409	1.36348	0.056338	0.181978	1	4293	tags=52%, list=28%, signal=72%
GOBP_REGULATION_OF_RECEPTOR_LOCALIZATION_TO_SYNAPSE	GOBP_REGULATION_OF_RECEPTOR_LOCALIZATION_TO_SYNAPSE	17	0.447975	1.36215	0.10664	0.183263	1	2351	tags=24%, list=15%, signal=28%
GOBP_CELLULAR_RESPONSE_TO_ESTROGEN_STIMULUS	GOBP_CELLULAR_RESPONSE_TO_ESTROGEN_STIMULUS	15	0.566512	1.36186	0.115308	0.183416	1	5205	tags=73%, list=34%, signal=111%
GOBP_PHAGOLYSOSOME_ASSEMBLY	GOBP_PHAGOLYSOSOME_ASSEMBLY	15	0.498443	1.3616	0.126016	0.183552	1	1721	tags=27%, list=11%, signal=30%
GOBP_INTRINSIC_APOPTOTIC_SIGNALING_PATHWAY_IN_RESPONSE_TO_OXIDATIVE_STRESS	GOBP_INTRINSIC_APOPTOTIC_SIGNALING_PATHWAY_IN_RESPONSE_TO_OXIDATIVE_STRESS	41	0.364925	1.36134	0.115686	0.183699	1	2896	tags=22%, list=19%, signal=27%
GOBP_NEGATIVE_REGULATION_OF_POSTTRANSCRIPTIONAL_GENE_SILENCING	GOBP_NEGATIVE_REGULATION_OF_POSTTRANSCRIPTIONAL_GENE_SILENCING	15	0.522776	1.36127	0.11609	0.18365	1	2538	tags=27%, list=17%, signal=32%
GOBP_CELLULAR_RESPONSE_TO_CADMIUM_ION	GOBP_CELLULAR_RESPONSE_TO_CADMIUM_ION	33	0.470986	1.36059	0.127168	0.184245	1	2794	tags=33%, list=18%, signal=41%
GOBP_REGULATION_OF_PROTEIN_MATURATION	GOBP_REGULATION_OF_PROTEIN_MATURATION	59	0.407135	1.36053	0.0533597	0.184212	1	2654	tags=24%, list=17%, signal=29%
GOBP_OVULATION	GOBP_OVULATION	22	0.573029	1.3603	0.0965795	0.184344	1	3093	tags=45%, list=20%, signal=57%
GOBP_RECEPTOR_RECYCLING	GOBP_RECEPTOR_RECYCLING	28	0.431175	1.3601	0.109344	0.184436	1	1646	tags=14%, list=11%, signal=16%
GOBP_REGULATION_OF_MYELINATION	GOBP_REGULATION_OF_MYELINATION	43	0.458113	1.35945	0.0916497	0.185009	1	2088	tags=30%, list=14%, signal=35%
GOBP_CARDIAC_MUSCLE_CELL_ACTION_POTENTIAL	GOBP_CARDIAC_MUSCLE_CELL_ACTION_POTENTIAL	68	0.473962	1.35853	0.0841487	0.185849	1	2387	tags=31%, list=16%, signal=36%
GOBP_RESPONSE_TO_INSULIN	GOBP_RESPONSE_TO_INSULIN	234	0.328257	1.35839	0.052	0.185874	1	5043	tags=38%, list=33%, signal=56%
GOBP_EPIBOLY	GOBP_EPIBOLY	32	0.465013	1.3583	0.135524	0.185851	1	4816	tags=44%, list=31%, signal=64%
GOBP_REGULATION_OF_CAMP_DEPENDENT_PROTEIN_KINASE_ACTIVITY	GOBP_REGULATION_OF_CAMP_DEPENDENT_PROTEIN_KINASE_ACTIVITY	18	0.557601	1.35822	0.126415	0.185825	1	5101	tags=61%, list=33%, signal=91%
GOBP_POSITIVE_REGULATION_OF_CYTOSOLIC_CALCIUM_ION_CONCENTRATION_INVOLVED_IN_PHOSPHOLIPASE_C_ACTIVATING_G_PROTEIN_COUPLED_SIGNALING_PATHWAY	GOBP_POSITIVE_REGULATION_OF_CYTOSOLIC_CALCIUM_ION_CONCENTRATION_INVOLVED_IN_PHOSPHOLIPASE_C_ACTIVATING_G_PROTEIN_COUPLED_SIGNALING_PATHWAY	31	0.561033	1.35783	0.0790514	0.186086	1	3677	tags=61%, list=24%, signal=80%
GOBP_NEGATIVE_REGULATION_OF_SYNAPTIC_TRANSMISSION	GOBP_NEGATIVE_REGULATION_OF_SYNAPTIC_TRANSMISSION	65	0.506737	1.35774	0.0589354	0.186071	1	3096	tags=35%, list=20%, signal=44%
GOBP_MATING	GOBP_MATING	39	0.517922	1.35773	0.0587121	0.185961	1	1514	tags=26%, list=10%, signal=28%
GOBP_MORPHOGENESIS_OF_AN_EPITHELIUM	GOBP_MORPHOGENESIS_OF_AN_EPITHELIUM	491	0.380418	1.35747	0.0460922	0.186104	1	3610	tags=31%, list=24%, signal=40%
GOBP_CELLULAR_RESPONSE_TO_KETONE	GOBP_CELLULAR_RESPONSE_TO_KETONE	86	0.39815	1.35746	0.0585859	0.185986	1	3136	tags=27%, list=20%, signal=33%
GOBP_LUNG_ALVEOLUS_DEVELOPMENT	GOBP_LUNG_ALVEOLUS_DEVELOPMENT	43	0.486494	1.35746	0.114286	0.185869	1	3602	tags=42%, list=23%, signal=55%
GOBP_GLIAL_CELL_APOPTOTIC_PROCESS	GOBP_GLIAL_CELL_APOPTOTIC_PROCESS	16	0.466654	1.35733	0.114754	0.185904	1	4645	tags=44%, list=30%, signal=63%
GOBP_REGULATION_OF_RENAL_SYSTEM_PROCESS	GOBP_REGULATION_OF_RENAL_SYSTEM_PROCESS	31	0.535436	1.35728	0.0874752	0.185829	1	3845	tags=52%, list=25%, signal=69%
GOBP_HOMOTYPIC_CELL_CELL_ADHESION	GOBP_HOMOTYPIC_CELL_CELL_ADHESION	85	0.454784	1.35711	0.0637066	0.185896	1	3111	tags=36%, list=20%, signal=45%
GOBP_POSITIVE_REGULATION_OF_VIRAL_PROCESS	GOBP_POSITIVE_REGULATION_OF_VIRAL_PROCESS	55	0.323043	1.35689	0.124248	0.186062	1	2545	tags=16%, list=17%, signal=20%
GOBP_DEVELOPMENTAL_CELL_GROWTH	GOBP_DEVELOPMENTAL_CELL_GROWTH	205	0.387938	1.35685	0.0469043	0.185971	1	3680	tags=33%, list=24%, signal=43%
GOBP_CENTRAL_NERVOUS_SYSTEM_PROJECTION_NEURON_AXONOGENESIS	GOBP_CENTRAL_NERVOUS_SYSTEM_PROJECTION_NEURON_AXONOGENESIS	25	0.522846	1.3567	0.110429	0.185995	1	3442	tags=36%, list=22%, signal=46%
GOBP_POSITIVE_REGULATION_OF_REGULATORY_T_CELL_DIFFERENTIATION	GOBP_POSITIVE_REGULATION_OF_REGULATORY_T_CELL_DIFFERENTIATION	16	0.618643	1.35624	0.173737	0.186376	1	3358	tags=63%, list=22%, signal=80%
GOBP_REGULATION_OF_CATECHOLAMINE_METABOLIC_PROCESS	GOBP_REGULATION_OF_CATECHOLAMINE_METABOLIC_PROCESS	19	0.559873	1.35491	0.104938	0.187656	1	2132	tags=32%, list=14%, signal=37%
GOBP_CARDIAC_CONDUCTION	GOBP_CARDIAC_CONDUCTION	88	0.477256	1.35458	0.0798403	0.18788	1	3825	tags=40%, list=25%, signal=53%
GOBP_CELLULAR_RESPONSE_TO_OXYGEN_RADICAL	GOBP_CELLULAR_RESPONSE_TO_OXYGEN_RADICAL	20	0.479475	1.35431	0.122661	0.187987	1	2756	tags=25%, list=18%, signal=30%
GOBP_POSITIVE_REGULATION_OF_MACROPHAGE_ACTIVATION	GOBP_POSITIVE_REGULATION_OF_MACROPHAGE_ACTIVATION	24	0.580666	1.35431	0.10338	0.187869	1	3087	tags=54%, list=20%, signal=68%
GOBP_HISTONE_H3_K14_ACETYLATION	GOBP_HISTONE_H3_K14_ACETYLATION	17	0.477405	1.3541	0.138365	0.187961	1	602	tags=12%, list=4%, signal=12%
GOBP_KILLING_OF_CELLS_OF_ANOTHER_ORGANISM	GOBP_KILLING_OF_CELLS_OF_ANOTHER_ORGANISM	34	0.542183	1.35405	0.0892857	0.187896	1	3031	tags=35%, list=20%, signal=44%
GOBP_EPITHELIAL_CELL_DIFFERENTIATION_INVOLVED_IN_KIDNEY_DEVELOPMENT	GOBP_EPITHELIAL_CELL_DIFFERENTIATION_INVOLVED_IN_KIDNEY_DEVELOPMENT	46	0.477716	1.35397	0.0599174	0.187866	1	3419	tags=37%, list=22%, signal=47%
GOBP_CELL_CELL_RECOGNITION	GOBP_CELL_CELL_RECOGNITION	63	0.435568	1.35352	0.0688336	0.188217	1	2757	tags=27%, list=18%, signal=33%
GOBP_POSITIVE_REGULATION_OF_MYOBLAST_DIFFERENTIATION	GOBP_POSITIVE_REGULATION_OF_MYOBLAST_DIFFERENTIATION	21	0.513752	1.35328	0.0946746	0.188348	1	2329	tags=29%, list=15%, signal=34%
GOBP_NEGATIVE_REGULATION_OF_RECEPTOR_SIGNALING_PATHWAY_VIA_JAK_STAT	GOBP_NEGATIVE_REGULATION_OF_RECEPTOR_SIGNALING_PATHWAY_VIA_JAK_STAT	20	0.472601	1.3531	0.128968	0.188423	1	4607	tags=50%, list=30%, signal=71%
GOBP_POSITIVE_REGULATION_OF_HISTONE_DEACETYLATION	GOBP_POSITIVE_REGULATION_OF_HISTONE_DEACETYLATION	22	0.425841	1.35255	0.137177	0.188894	1	2707	tags=18%, list=18%, signal=22%
GOBP_RESPONSE_TO_ELECTRICAL_STIMULUS	GOBP_RESPONSE_TO_ELECTRICAL_STIMULUS	38	0.448005	1.35239	0.0742188	0.188956	1	3854	tags=37%, list=25%, signal=49%
GOBP_PROTEIN_CONTAINING_COMPLEX_REMODELING	GOBP_PROTEIN_CONTAINING_COMPLEX_REMODELING	33	0.574342	1.35181	0.0684932	0.189426	1	3091	tags=48%, list=20%, signal=61%
GOBP_NUCLEOSIDE_CATABOLIC_PROCESS	GOBP_NUCLEOSIDE_CATABOLIC_PROCESS	23	0.539238	1.35155	0.0996094	0.189586	1	4004	tags=48%, list=26%, signal=65%
GOBP_POSITIVE_REGULATION_OF_WNT_SIGNALING_PATHWAY	GOBP_POSITIVE_REGULATION_OF_WNT_SIGNALING_PATHWAY	128	0.377893	1.35092	0.0852391	0.190136	1	4609	tags=41%, list=30%, signal=58%
GOBP_REGULATION_OF_CLATHRIN_DEPENDENT_ENDOCYTOSIS	GOBP_REGULATION_OF_CLATHRIN_DEPENDENT_ENDOCYTOSIS	18	0.492556	1.35067	0.126233	0.190278	1	5319	tags=50%, list=35%, signal=76%
GOBP_NEGATIVE_REGULATION_OF_CELL_CYCLE_G1_S_PHASE_TRANSITION	GOBP_NEGATIVE_REGULATION_OF_CELL_CYCLE_G1_S_PHASE_TRANSITION	73	0.357985	1.35047	0.0661323	0.190385	1	4669	tags=47%, list=30%, signal=67%
GOBP_METAL_ION_EXPORT	GOBP_METAL_ION_EXPORT	43	0.516715	1.3504	0.0998004	0.190343	1	2864	tags=35%, list=19%, signal=43%
GOBP_HEPARIN_METABOLIC_PROCESS	GOBP_HEPARIN_METABOLIC_PROCESS	15	0.546992	1.35023	0.128151	0.190387	1	5527	tags=73%, list=36%, signal=114%
GOBP_MAMMARY_GLAND_DEVELOPMENT	GOBP_MAMMARY_GLAND_DEVELOPMENT	124	0.406821	1.35016	0.052	0.190349	1	3158	tags=32%, list=21%, signal=40%
GOBP_ROOF_OF_MOUTH_DEVELOPMENT	GOBP_ROOF_OF_MOUTH_DEVELOPMENT	87	0.457992	1.34976	0.109244	0.19062	1	3977	tags=40%, list=26%, signal=54%
GOBP_POSITIVE_REGULATION_OF_LIPID_STORAGE	GOBP_POSITIVE_REGULATION_OF_LIPID_STORAGE	23	0.509003	1.34964	0.0965092	0.190628	1	3390	tags=43%, list=22%, signal=56%
GOBP_POSITIVE_REGULATION_OF_GLYCOLYTIC_PROCESS	GOBP_POSITIVE_REGULATION_OF_GLYCOLYTIC_PROCESS	19	0.554312	1.34888	0.122	0.191296	1	2517	tags=37%, list=16%, signal=44%
GOBP_POSITIVE_REGULATION_OF_NATURAL_KILLER_CELL_MEDIATED_CYTOTOXICITY	GOBP_POSITIVE_REGULATION_OF_NATURAL_KILLER_CELL_MEDIATED_CYTOTOXICITY	23	0.693049	1.34835	0.153257	0.191746	1	2849	tags=65%, list=19%, signal=80%
GOBP_PROTEIN_CONTAINING_COMPLEX_DISASSEMBLY	GOBP_PROTEIN_CONTAINING_COMPLEX_DISASSEMBLY	215	0.287	1.34815	0.0751445	0.191847	1	4574	tags=32%, list=30%, signal=44%
GOBP_POLYSACCHARIDE_METABOLIC_PROCESS	GOBP_POLYSACCHARIDE_METABOLIC_PROCESS	96	0.367301	1.34743	0.0480167	0.192452	1	3785	tags=30%, list=25%, signal=40%
GOBP_GLUCOSAMINE_CONTAINING_COMPOUND_METABOLIC_PROCESS	GOBP_GLUCOSAMINE_CONTAINING_COMPOUND_METABOLIC_PROCESS	22	0.513762	1.3473	0.0920771	0.19247	1	2524	tags=27%, list=16%, signal=33%
GOBP_PHOTOTRANSDUCTION_VISIBLE_LIGHT	GOBP_PHOTOTRANSDUCTION_VISIBLE_LIGHT	19	0.524789	1.34661	0.115063	0.193106	1	5042	tags=47%, list=33%, signal=70%
GOBP_LIPID_HOMEOSTASIS	GOBP_LIPID_HOMEOSTASIS	137	0.408185	1.34633	0.0516899	0.193298	1	3300	tags=30%, list=21%, signal=38%
GOBP_LONG_CHAIN_FATTY_ACID_TRANSPORT	GOBP_LONG_CHAIN_FATTY_ACID_TRANSPORT	61	0.477331	1.34588	0.0650407	0.193644	1	2248	tags=30%, list=15%, signal=34%
GOBP_BROWN_FAT_CELL_DIFFERENTIATION	GOBP_BROWN_FAT_CELL_DIFFERENTIATION	47	0.480357	1.34587	0.0887097	0.193534	1	2608	tags=28%, list=17%, signal=33%
GOBP_CYCLIC_NUCLEOTIDE_BIOSYNTHETIC_PROCESS	GOBP_CYCLIC_NUCLEOTIDE_BIOSYNTHETIC_PROCESS	20	0.539686	1.34577	0.0901961	0.193503	1	3816	tags=45%, list=25%, signal=60%
GOBP_REGULATION_OF_POSITIVE_CHEMOTAXIS	GOBP_REGULATION_OF_POSITIVE_CHEMOTAXIS	24	0.573428	1.34569	0.0981595	0.193477	1	1845	tags=38%, list=12%, signal=43%
GOBP_PHOSPHATE_ION_TRANSPORT	GOBP_PHOSPHATE_ION_TRANSPORT	26	0.490082	1.34564	0.126609	0.193407	1	682	tags=12%, list=4%, signal=12%
GOBP_GLIOGENESIS	GOBP_GLIOGENESIS	268	0.394484	1.34536	0.0529301	0.193602	1	3385	tags=29%, list=22%, signal=37%
GOBP_PROTEIN_DEGLYCOSYLATION	GOBP_PROTEIN_DEGLYCOSYLATION	23	0.403772	1.3449	0.170297	0.193975	1	5467	tags=48%, list=36%, signal=74%
GOBP_CELL_DEATH_IN_RESPONSE_TO_HYDROGEN_PEROXIDE	GOBP_CELL_DEATH_IN_RESPONSE_TO_HYDROGEN_PEROXIDE	23	0.467643	1.34471	0.097166	0.194038	1	1378	tags=22%, list=9%, signal=24%
GOBP_RETINA_VASCULATURE_DEVELOPMENT_IN_CAMERA_TYPE_EYE	GOBP_RETINA_VASCULATURE_DEVELOPMENT_IN_CAMERA_TYPE_EYE	19	0.522079	1.34456	0.15304	0.194084	1	3759	tags=53%, list=24%, signal=70%
GOBP_PHENOL_CONTAINING_COMPOUND_METABOLIC_PROCESS	GOBP_PHENOL_CONTAINING_COMPOUND_METABOLIC_PROCESS	102	0.460474	1.34435	0.0376984	0.19418	1	3129	tags=37%, list=20%, signal=46%
GOBP_MEGAKARYOCYTE_DEVELOPMENT	GOBP_MEGAKARYOCYTE_DEVELOPMENT	16	0.529133	1.34429	0.165323	0.194106	1	2604	tags=44%, list=17%, signal=53%
GOBP_NEURON_PROJECTION_REGENERATION	GOBP_NEURON_PROJECTION_REGENERATION	52	0.44144	1.34359	0.0785855	0.1947	1	3631	tags=40%, list=24%, signal=53%
GOBP_RHYTHMIC_PROCESS	GOBP_RHYTHMIC_PROCESS	279	0.359695	1.34341	0.0263158	0.19477	1	2664	tags=21%, list=17%, signal=25%
GOBP_NEGATIVE_REGULATION_OF_ESTABLISHMENT_OF_PROTEIN_LOCALIZATION	GOBP_NEGATIVE_REGULATION_OF_ESTABLISHMENT_OF_PROTEIN_LOCALIZATION	108	0.365202	1.34284	0.0707269	0.195248	1	4811	tags=34%, list=31%, signal=50%
GOBP_SODIUM_ION_TRANSMEMBRANE_TRANSPORT	GOBP_SODIUM_ION_TRANSMEMBRANE_TRANSPORT	161	0.431458	1.3426	0.0510806	0.195389	1	3644	tags=34%, list=24%, signal=44%
GOBP_MESODERM_DEVELOPMENT	GOBP_MESODERM_DEVELOPMENT	114	0.398489	1.34202	0.0725806	0.195864	1	3850	tags=32%, list=25%, signal=42%
GOBP_REGULATION_OF_HEART_RATE_BY_CARDIAC_CONDUCTION	GOBP_REGULATION_OF_HEART_RATE_BY_CARDIAC_CONDUCTION	36	0.534013	1.34119	0.10241	0.196621	1	2387	tags=33%, list=16%, signal=39%
GOBP_NEGATIVE_REGULATION_OF_VASCULAR_PERMEABILITY	GOBP_NEGATIVE_REGULATION_OF_VASCULAR_PERMEABILITY	16	0.612966	1.34075	0.113872	0.196971	1	1393	tags=31%, list=9%, signal=34%
GOBP_CARBOHYDRATE_TRANSMEMBRANE_TRANSPORT	GOBP_CARBOHYDRATE_TRANSMEMBRANE_TRANSPORT	104	0.40124	1.34068	0.0648536	0.196911	1	3321	tags=31%, list=22%, signal=39%
GOBP_CARDIAC_LEFT_VENTRICLE_MORPHOGENESIS	GOBP_CARDIAC_LEFT_VENTRICLE_MORPHOGENESIS	15	0.597689	1.33932	0.133205	0.198323	1	3440	tags=47%, list=22%, signal=60%
GOBP_REGULATION_OF_CILIUM_ASSEMBLY	GOBP_REGULATION_OF_CILIUM_ASSEMBLY	79	0.343648	1.33851	0.144841	0.19908	1	4731	tags=38%, list=31%, signal=55%
GOBP_BRANCHING_INVOLVED_IN_MAMMARY_GLAND_DUCT_MORPHOGENESIS	GOBP_BRANCHING_INVOLVED_IN_MAMMARY_GLAND_DUCT_MORPHOGENESIS	22	0.515671	1.33808	0.125	0.199425	1	4037	tags=55%, list=26%, signal=74%
GOBP_POSITIVE_REGULATION_OF_RESPONSE_TO_WOUNDING	GOBP_POSITIVE_REGULATION_OF_RESPONSE_TO_WOUNDING	62	0.462957	1.33802	0.10084	0.199371	1	3148	tags=37%, list=20%, signal=46%
GOBP_REGULATION_OF_VOLTAGE_GATED_CALCIUM_CHANNEL_ACTIVITY	GOBP_REGULATION_OF_VOLTAGE_GATED_CALCIUM_CHANNEL_ACTIVITY	29	0.498025	1.33799	0.0961145	0.199279	1	2843	tags=38%, list=19%, signal=46%
GOBP_RESPONSE_TO_SALT	GOBP_RESPONSE_TO_SALT	17	0.498718	1.33726	0.154004	0.199974	1	2516	tags=24%, list=16%, signal=28%
GOBP_HEART_FIELD_SPECIFICATION	GOBP_HEART_FIELD_SPECIFICATION	17	0.615047	1.33652	0.11245	0.200668	1	3385	tags=59%, list=22%, signal=75%
GOBP_REGULATION_OF_NEURON_PROJECTION_DEVELOPMENT	GOBP_REGULATION_OF_NEURON_PROJECTION_DEVELOPMENT	398	0.378496	1.33642	0.0597015	0.200654	1	3750	tags=33%, list=24%, signal=42%
GOBP_POSITIVE_REGULATION_OF_GLUCOSE_TRANSMEMBRANE_TRANSPORT	GOBP_POSITIVE_REGULATION_OF_GLUCOSE_TRANSMEMBRANE_TRANSPORT	40	0.434998	1.33616	0.0929293	0.200835	1	3076	tags=30%, list=20%, signal=37%
GOBP_REGULATION_OF_TRIGLYCERIDE_BIOSYNTHETIC_PROCESS	GOBP_REGULATION_OF_TRIGLYCERIDE_BIOSYNTHETIC_PROCESS	17	0.550652	1.33566	0.142857	0.201265	1	2249	tags=35%, list=15%, signal=41%
GOBP_POSITIVE_REGULATION_OF_NATURAL_KILLER_CELL_MEDIATED_IMMUNITY	GOBP_POSITIVE_REGULATION_OF_NATURAL_KILLER_CELL_MEDIATED_IMMUNITY	26	0.687605	1.33554	0.15444	0.201286	1	2849	tags=65%, list=19%, signal=80%
GOBP_NEGATIVE_REGULATION_OF_PEPTIDASE_ACTIVITY	GOBP_NEGATIVE_REGULATION_OF_PEPTIDASE_ACTIVITY	222	0.420433	1.3351	0.0402414	0.201634	1	3353	tags=35%, list=22%, signal=44%
GOBP_CARDIAC_MUSCLE_TISSUE_MORPHOGENESIS	GOBP_CARDIAC_MUSCLE_TISSUE_MORPHOGENESIS	59	0.464557	1.33501	0.0862745	0.201622	1	3440	tags=41%, list=22%, signal=52%
GOBP_DEVELOPMENTAL_GROWTH_INVOLVED_IN_MORPHOGENESIS	GOBP_DEVELOPMENTAL_GROWTH_INVOLVED_IN_MORPHOGENESIS	218	0.383933	1.33467	0.0502901	0.201858	1	3680	tags=33%, list=24%, signal=43%
GOBP_HEMATOPOIETIC_PROGENITOR_CELL_DIFFERENTIATION	GOBP_HEMATOPOIETIC_PROGENITOR_CELL_DIFFERENTIATION	117	0.371333	1.33427	0.0662768	0.202195	1	2766	tags=22%, list=18%, signal=27%
GOBP_NEURON_PROJECTION_ORGANIZATION	GOBP_NEURON_PROJECTION_ORGANIZATION	82	0.398062	1.33371	0.0772128	0.202652	1	3147	tags=27%, list=20%, signal=34%
GOBP_CRANIOFACIAL_SUTURE_MORPHOGENESIS	GOBP_CRANIOFACIAL_SUTURE_MORPHOGENESIS	17	0.57338	1.33369	0.10387	0.202553	1	4751	tags=53%, list=31%, signal=77%
GOBP_REGULATION_OF_TISSUE_REMODELING	GOBP_REGULATION_OF_TISSUE_REMODELING	69	0.469165	1.33362	0.0701754	0.202496	1	4370	tags=55%, list=28%, signal=77%
GOBP_RESPONSE_TO_FOLLICLE_STIMULATING_HORMONE	GOBP_RESPONSE_TO_FOLLICLE_STIMULATING_HORMONE	17	0.51997	1.33353	0.130952	0.202468	1	2671	tags=35%, list=17%, signal=43%
GOBP_TORC1_SIGNALING	GOBP_TORC1_SIGNALING	41	0.337076	1.33216	0.122661	0.203856	1	4491	tags=32%, list=29%, signal=45%
GOBP_RESPONSE_TO_INCREASED_OXYGEN_LEVELS	GOBP_RESPONSE_TO_INCREASED_OXYGEN_LEVELS	25	0.448659	1.33097	0.147475	0.205058	1	3826	tags=36%, list=25%, signal=48%
GOBP_OLIGOSACCHARIDE_METABOLIC_PROCESS	GOBP_OLIGOSACCHARIDE_METABOLIC_PROCESS	58	0.437408	1.33024	0.0903846	0.205681	1	4674	tags=40%, list=30%, signal=57%
GOBP_RESPONSE_TO_INORGANIC_SUBSTANCE	GOBP_RESPONSE_TO_INORGANIC_SUBSTANCE	478	0.339557	1.32994	0.0385356	0.20586	1	3526	tags=28%, list=23%, signal=36%
GOBP_HOMOPHILIC_CELL_ADHESION_VIA_PLASMA_MEMBRANE_ADHESION_MOLECULES	GOBP_HOMOPHILIC_CELL_ADHESION_VIA_PLASMA_MEMBRANE_ADHESION_MOLECULES	141	0.486751	1.32981	0.07393	0.205892	1	3628	tags=42%, list=24%, signal=54%
GOBP_REGULATION_OF_RESPONSE_TO_TUMOR_CELL	GOBP_REGULATION_OF_RESPONSE_TO_TUMOR_CELL	19	0.601982	1.3293	0.166016	0.206318	1	2585	tags=47%, list=17%, signal=57%
GOBP_POSITIVE_REGULATION_OF_STRIATED_MUSCLE_CELL_DIFFERENTIATION	GOBP_POSITIVE_REGULATION_OF_STRIATED_MUSCLE_CELL_DIFFERENTIATION	42	0.459288	1.32886	0.0817996	0.206688	1	3066	tags=36%, list=20%, signal=45%
GOBP_FATTY_ACID_TRANSPORT	GOBP_FATTY_ACID_TRANSPORT	90	0.452483	1.32865	0.0557769	0.206813	1	2691	tags=33%, list=18%, signal=40%
GOBP_PHOTOPERIODISM	GOBP_PHOTOPERIODISM	31	0.434144	1.32856	0.134694	0.206784	1	4315	tags=45%, list=28%, signal=63%
GOBP_REGULATION_OF_FATTY_ACID_BIOSYNTHETIC_PROCESS	GOBP_REGULATION_OF_FATTY_ACID_BIOSYNTHETIC_PROCESS	41	0.423278	1.32847	0.0855513	0.206747	1	4607	tags=44%, list=30%, signal=63%
GOBP_IMPORT_INTO_CELL	GOBP_IMPORT_INTO_CELL	213	0.393874	1.32837	0.0316206	0.206744	1	3695	tags=34%, list=24%, signal=45%
GOBP_REGULATION_OF_WNT_SIGNALING_PATHWAY	GOBP_REGULATION_OF_WNT_SIGNALING_PATHWAY	291	0.361802	1.3276	0.0872211	0.207479	1	4479	tags=36%, list=29%, signal=50%
GOBP_MESODERM_MORPHOGENESIS	GOBP_MESODERM_MORPHOGENESIS	65	0.447887	1.32759	0.101626	0.207356	1	3850	tags=34%, list=25%, signal=45%
GOBP_CELLULAR_PIGMENTATION	GOBP_CELLULAR_PIGMENTATION	48	0.378784	1.32741	0.129436	0.207427	1	4964	tags=35%, list=32%, signal=52%
GOBP_NEGATIVE_REGULATION_OF_AMINE_TRANSPORT	GOBP_NEGATIVE_REGULATION_OF_AMINE_TRANSPORT	26	0.591806	1.32738	0.0949495	0.207339	1	3897	tags=62%, list=25%, signal=82%
GOBP_TRANSEPITHELIAL_TRANSPORT	GOBP_TRANSEPITHELIAL_TRANSPORT	32	0.524769	1.3272	0.0991735	0.207391	1	3957	tags=53%, list=26%, signal=71%
GOBP_RESPONSE_TO_CATECHOLAMINE	GOBP_RESPONSE_TO_CATECHOLAMINE	90	0.404049	1.32697	0.076	0.207539	1	3646	tags=31%, list=24%, signal=41%
GOBP_NEGATIVE_REGULATION_OF_GLUCOSE_TRANSMEMBRANE_TRANSPORT	GOBP_NEGATIVE_REGULATION_OF_GLUCOSE_TRANSMEMBRANE_TRANSPORT	16	0.563164	1.32627	0.15121	0.208201	1	1988	tags=31%, list=13%, signal=36%
GOBP_PROTEIN_CATABOLIC_PROCESS_IN_THE_VACUOLE	GOBP_PROTEIN_CATABOLIC_PROCESS_IN_THE_VACUOLE	21	0.453334	1.32619	0.162698	0.20819	1	4952	tags=48%, list=32%, signal=70%
GOBP_POSITIVE_REGULATION_OF_AXON_EXTENSION	GOBP_POSITIVE_REGULATION_OF_AXON_EXTENSION	37	0.417888	1.32528	0.138614	0.209023	1	3580	tags=32%, list=23%, signal=42%
GOBP_PIGMENTATION	GOBP_PIGMENTATION	92	0.37083	1.32467	0.0641822	0.209578	1	2762	tags=23%, list=18%, signal=28%
GOBP_CHAPERONE_MEDIATED_AUTOPHAGY	GOBP_CHAPERONE_MEDIATED_AUTOPHAGY	16	0.49479	1.32446	0.147705	0.209678	1	1931	tags=25%, list=13%, signal=29%
GOBP_CELLULAR_SODIUM_ION_HOMEOSTASIS	GOBP_CELLULAR_SODIUM_ION_HOMEOSTASIS	22	0.562572	1.32406	0.0929752	0.21006	1	2140	tags=32%, list=14%, signal=37%
GOBP_RESPONSE_TO_MINERALOCORTICOID	GOBP_RESPONSE_TO_MINERALOCORTICOID	27	0.500981	1.32402	0.105263	0.209987	1	3845	tags=37%, list=25%, signal=49%
GOBP_REGULATION_OF_T_CELL_CHEMOTAXIS	GOBP_REGULATION_OF_T_CELL_CHEMOTAXIS	15	0.602334	1.32351	0.1417	0.210427	1	2953	tags=47%, list=19%, signal=58%
GOBP_POSITIVE_REGULATION_OF_SMAD_PROTEIN_SIGNAL_TRANSDUCTION	GOBP_POSITIVE_REGULATION_OF_SMAD_PROTEIN_SIGNAL_TRANSDUCTION	18	0.518831	1.32339	0.118393	0.210459	1	4437	tags=56%, list=29%, signal=78%
GOBP_INTERFERON_GAMMA_MEDIATED_SIGNALING_PATHWAY	GOBP_INTERFERON_GAMMA_MEDIATED_SIGNALING_PATHWAY	23	0.527947	1.32328	0.176955	0.210459	1	3251	tags=43%, list=21%, signal=55%
GOBP_REGULATION_OF_FATTY_ACID_BETA_OXIDATION	GOBP_REGULATION_OF_FATTY_ACID_BETA_OXIDATION	18	0.474853	1.32318	0.123552	0.210441	1	2417	tags=28%, list=16%, signal=33%
GOBP_NEUROTRANSMITTER_UPTAKE	GOBP_NEUROTRANSMITTER_UPTAKE	42	0.512718	1.32308	0.0688336	0.210414	1	1783	tags=26%, list=12%, signal=30%
GOBP_MEMBRANE_FUSION	GOBP_MEMBRANE_FUSION	135	0.318344	1.323	0.0737052	0.210378	1	3202	tags=22%, list=21%, signal=28%
GOBP_CHRONIC_INFLAMMATORY_RESPONSE	GOBP_CHRONIC_INFLAMMATORY_RESPONSE	16	0.673782	1.32282	0.124248	0.21046	1	3374	tags=56%, list=22%, signal=72%
GOBP_POSITIVE_REGULATION_OF_PROTEIN_SECRETION	GOBP_POSITIVE_REGULATION_OF_PROTEIN_SECRETION	119	0.390335	1.32259	0.0586011	0.210626	1	3842	tags=31%, list=25%, signal=41%
GOBP_REGULATION_OF_GLUCOSE_IMPORT	GOBP_REGULATION_OF_GLUCOSE_IMPORT	52	0.417707	1.32243	0.108333	0.210664	1	3209	tags=27%, list=21%, signal=34%
GOBP_REGULATION_OF_LIPOPROTEIN_PARTICLE_CLEARANCE	GOBP_REGULATION_OF_LIPOPROTEIN_PARTICLE_CLEARANCE	20	0.516256	1.3222	0.124506	0.210769	1	4260	tags=50%, list=28%, signal=69%
GOBP_NEGATIVE_REGULATION_OF_NECROTIC_CELL_DEATH	GOBP_NEGATIVE_REGULATION_OF_NECROTIC_CELL_DEATH	16	0.447717	1.32214	0.157058	0.210715	1	4492	tags=44%, list=29%, signal=62%
GOBP_NEPHRON_DEVELOPMENT	GOBP_NEPHRON_DEVELOPMENT	142	0.4259	1.32184	0.0725806	0.210924	1	3419	tags=32%, list=22%, signal=41%
GOBP_EXTRACELLULAR_MATRIX_DISASSEMBLY	GOBP_EXTRACELLULAR_MATRIX_DISASSEMBLY	57	0.500917	1.32174	0.130612	0.210905	1	4017	tags=44%, list=26%, signal=59%
GOBP_POSITIVE_REGULATION_OF_GROWTH	GOBP_POSITIVE_REGULATION_OF_GROWTH	222	0.353387	1.32155	0.0394477	0.210983	1	4370	tags=34%, list=28%, signal=47%
GOBP_AMYLOID_PRECURSOR_PROTEIN_METABOLIC_PROCESS	GOBP_AMYLOID_PRECURSOR_PROTEIN_METABOLIC_PROCESS	65	0.380113	1.32152	0.148221	0.210898	1	3209	tags=29%, list=21%, signal=37%
GOBP_REVERSE_CHOLESTEROL_TRANSPORT	GOBP_REVERSE_CHOLESTEROL_TRANSPORT	16	0.594969	1.32106	0.15458	0.211298	1	2800	tags=56%, list=18%, signal=69%
GOBP_REGULATION_OF_SYNAPSE_STRUCTURE_OR_ACTIVITY	GOBP_REGULATION_OF_SYNAPSE_STRUCTURE_OR_ACTIVITY	191	0.430788	1.32093	0.0819048	0.211311	1	3418	tags=32%, list=22%, signal=41%
GOBP_POSITIVE_REGULATION_OF_CELL_ADHESION_MEDIATED_BY_INTEGRIN	GOBP_POSITIVE_REGULATION_OF_CELL_ADHESION_MEDIATED_BY_INTEGRIN	20	0.544531	1.32026	0.116232	0.211955	1	2508	tags=45%, list=16%, signal=54%
GOBP_POSITIVE_REGULATION_OF_TRANSMEMBRANE_RECEPTOR_PROTEIN_SERINE_THREONINE_KINASE_SIGNALING_PATHWAY	GOBP_POSITIVE_REGULATION_OF_TRANSMEMBRANE_RECEPTOR_PROTEIN_SERINE_THREONINE_KINASE_SIGNALING_PATHWAY	112	0.403831	1.3201	0.0576541	0.212007	1	3419	tags=33%, list=22%, signal=42%
GOBP_PURINE_CONTAINING_COMPOUND_METABOLIC_PROCESS	GOBP_PURINE_CONTAINING_COMPOUND_METABOLIC_PROCESS	343	0.315931	1.31996	0.0465587	0.21204	1	3975	tags=27%, list=26%, signal=35%
GOBP_REGULATION_OF_NEURON_PROJECTION_ARBORIZATION	GOBP_REGULATION_OF_NEURON_PROJECTION_ARBORIZATION	15	0.515196	1.31962	0.131931	0.212283	1	2977	tags=33%, list=19%, signal=41%
GOBP_AMMONIUM_ION_METABOLIC_PROCESS	GOBP_AMMONIUM_ION_METABOLIC_PROCESS	23	0.556429	1.31947	0.1139	0.212337	1	3617	tags=48%, list=24%, signal=62%
GOBP_PROTEIN_LOCALIZATION_TO_ENDOPLASMIC_RETICULUM	GOBP_PROTEIN_LOCALIZATION_TO_ENDOPLASMIC_RETICULUM	64	0.279858	1.31927	0.135081	0.212433	1	3364	tags=14%, list=22%, signal=18%
GOBP_REGULATION_OF_LYMPHOCYTE_CHEMOTAXIS	GOBP_REGULATION_OF_LYMPHOCYTE_CHEMOTAXIS	19	0.591474	1.31918	0.150905	0.212422	1	3336	tags=53%, list=22%, signal=67%
GOBP_POSITIVE_REGULATION_OF_FATTY_ACID_BIOSYNTHETIC_PROCESS	GOBP_POSITIVE_REGULATION_OF_FATTY_ACID_BIOSYNTHETIC_PROCESS	21	0.501859	1.31866	0.121495	0.212892	1	4372	tags=48%, list=28%, signal=66%
GOBP_ACTIN_MYOSIN_FILAMENT_SLIDING	GOBP_ACTIN_MYOSIN_FILAMENT_SLIDING	16	0.621342	1.31856	0.120155	0.212883	1	3341	tags=38%, list=22%, signal=48%
GOBP_CELLULAR_RESPONSE_TO_PROSTAGLANDIN_STIMULUS	GOBP_CELLULAR_RESPONSE_TO_PROSTAGLANDIN_STIMULUS	19	0.578309	1.3181	0.117647	0.213284	1	1356	tags=32%, list=9%, signal=35%
GOBP_REGULATORY_T_CELL_DIFFERENTIATION	GOBP_REGULATORY_T_CELL_DIFFERENTIATION	30	0.568687	1.31776	0.206478	0.213534	1	2527	tags=47%, list=16%, signal=56%
GOBP_ANATOMICAL_STRUCTURE_MATURATION	GOBP_ANATOMICAL_STRUCTURE_MATURATION	219	0.391163	1.3172	0.0335306	0.214051	1	2249	tags=23%, list=15%, signal=27%
GOBP_PROTEIN_LOCALIZATION_TO_CILIARY_MEMBRANE	GOBP_PROTEIN_LOCALIZATION_TO_CILIARY_MEMBRANE	15	0.459089	1.31716	0.206287	0.213961	1	5446	tags=47%, list=35%, signal=72%
GOBP_RESPONSE_TO_ESTROGEN	GOBP_RESPONSE_TO_ESTROGEN	63	0.436628	1.31703	0.100189	0.213977	1	3486	tags=43%, list=23%, signal=55%
GOBP_CELLULAR_RESPONSE_TO_INSULIN_STIMULUS	GOBP_CELLULAR_RESPONSE_TO_INSULIN_STIMULUS	183	0.325914	1.31688	0.0684105	0.214029	1	5035	tags=37%, list=33%, signal=55%
GOBP_ENDOCRINE_PROCESS	GOBP_ENDOCRINE_PROCESS	80	0.46503	1.31634	0.0359281	0.214472	1	3363	tags=39%, list=22%, signal=49%
GOBP_VASCULAR_ASSOCIATED_SMOOTH_MUSCLE_CELL_MIGRATION	GOBP_VASCULAR_ASSOCIATED_SMOOTH_MUSCLE_CELL_MIGRATION	21	0.538176	1.31597	0.117764	0.214758	1	2925	tags=38%, list=19%, signal=47%
GOBP_NEUTROPHIL_HOMEOSTASIS	GOBP_NEUTROPHIL_HOMEOSTASIS	15	0.534168	1.31564	0.15534	0.215032	1	4290	tags=73%, list=28%, signal=102%
GOBP_NEGATIVE_REGULATION_OF_PROTEIN_CONTAINING_COMPLEX_ASSEMBLY	GOBP_NEGATIVE_REGULATION_OF_PROTEIN_CONTAINING_COMPLEX_ASSEMBLY	126	0.343333	1.31523	0.0801603	0.215396	1	4470	tags=38%, list=29%, signal=53%
GOBP_POSITIVE_REGULATION_OF_PROTEIN_AUTOPHOSPHORYLATION	GOBP_POSITIVE_REGULATION_OF_PROTEIN_AUTOPHOSPHORYLATION	24	0.438707	1.31494	0.145263	0.215642	1	3276	tags=33%, list=21%, signal=42%
GOBP_NEGATIVE_REGULATION_OF_MUSCLE_CELL_DIFFERENTIATION	GOBP_NEGATIVE_REGULATION_OF_MUSCLE_CELL_DIFFERENTIATION	54	0.422124	1.31492	0.128906	0.215536	1	5035	tags=43%, list=33%, signal=63%
GOBP_GLYCOSPHINGOLIPID_BIOSYNTHETIC_PROCESS	GOBP_GLYCOSPHINGOLIPID_BIOSYNTHETIC_PROCESS	30	0.504589	1.31487	0.122047	0.21547	1	3263	tags=30%, list=21%, signal=38%
GOBP_NEGATIVE_REGULATION_OF_WOUND_HEALING	GOBP_NEGATIVE_REGULATION_OF_WOUND_HEALING	69	0.505341	1.31455	0.0776892	0.215699	1	3111	tags=46%, list=20%, signal=58%
GOBP_CELLULAR_OXIDANT_DETOXIFICATION	GOBP_CELLULAR_OXIDANT_DETOXIFICATION	78	0.405675	1.31404	0.090535	0.216185	1	2802	tags=24%, list=18%, signal=30%
GOBP_RESPONSE_TO_PEPTIDE_HORMONE	GOBP_RESPONSE_TO_PEPTIDE_HORMONE	364	0.332842	1.31395	0.0444015	0.216159	1	2783	tags=21%, list=18%, signal=25%
GOBP_UROGENITAL_SYSTEM_DEVELOPMENT	GOBP_UROGENITAL_SYSTEM_DEVELOPMENT	340	0.401269	1.31359	0.0626263	0.216431	1	3850	tags=36%, list=25%, signal=48%
GOBP_REGULATION_OF_CARDIAC_MUSCLE_CELL_ACTION_POTENTIAL	GOBP_REGULATION_OF_CARDIAC_MUSCLE_CELL_ACTION_POTENTIAL	25	0.478088	1.31261	0.139535	0.217392	1	1906	tags=32%, list=12%, signal=36%
GOBP_POSITIVE_REGULATION_OF_FATTY_ACID_METABOLIC_PROCESS	GOBP_POSITIVE_REGULATION_OF_FATTY_ACID_METABOLIC_PROCESS	36	0.466471	1.3126	0.094162	0.217279	1	2355	tags=25%, list=15%, signal=29%
GOBP_ESTABLISHMENT_OF_TISSUE_POLARITY	GOBP_ESTABLISHMENT_OF_TISSUE_POLARITY	70	0.437404	1.31254	0.0972516	0.21724	1	3417	tags=33%, list=22%, signal=42%
GOBP_RENAL_TUBULAR_SECRETION	GOBP_RENAL_TUBULAR_SECRETION	24	0.507649	1.31242	0.108	0.217257	1	2736	tags=33%, list=18%, signal=40%
GOBP_SYNAPSE_ORGANIZATION	GOBP_SYNAPSE_ORGANIZATION	386	0.409974	1.31089	0.0664137	0.218842	1	3418	tags=31%, list=22%, signal=39%
GOBP_RESPONSE_TO_KETONE	GOBP_RESPONSE_TO_KETONE	177	0.38788	1.31054	0.0750988	0.219132	1	3160	tags=26%, list=21%, signal=32%
GOBP_PHOSPHOLIPID_TRANSPORT	GOBP_PHOSPHOLIPID_TRANSPORT	89	0.396782	1.31047	0.0984252	0.21909	1	3091	tags=29%, list=20%, signal=36%
GOBP_BRANCHING_INVOLVED_IN_SALIVARY_GLAND_MORPHOGENESIS	GOBP_BRANCHING_INVOLVED_IN_SALIVARY_GLAND_MORPHOGENESIS	21	0.515083	1.31039	0.147609	0.219056	1	3756	tags=43%, list=24%, signal=57%
GOBP_REGULATION_OF_SENSORY_PERCEPTION	GOBP_REGULATION_OF_SENSORY_PERCEPTION	26	0.566013	1.3102	0.103734	0.219137	1	3397	tags=54%, list=22%, signal=69%
GOBP_NEGATIVE_REGULATION_OF_AXON_EXTENSION_INVOLVED_IN_AXON_GUIDANCE	GOBP_NEGATIVE_REGULATION_OF_AXON_EXTENSION_INVOLVED_IN_AXON_GUIDANCE	25	0.524041	1.30996	0.140281	0.219283	1	3349	tags=44%, list=22%, signal=56%
GOBP_GLYCOSPHINGOLIPID_METABOLIC_PROCESS	GOBP_GLYCOSPHINGOLIPID_METABOLIC_PROCESS	54	0.413725	1.30982	0.101871	0.219299	1	4682	tags=35%, list=30%, signal=50%
GOBP_EPIDERMIS_MORPHOGENESIS	GOBP_EPIDERMIS_MORPHOGENESIS	33	0.515664	1.30928	0.11306	0.219772	1	3091	tags=39%, list=20%, signal=49%
GOBP_SPHINGOLIPID_METABOLIC_PROCESS	GOBP_SPHINGOLIPID_METABOLIC_PROCESS	142	0.34767	1.30828	0.0737864	0.220785	1	3557	tags=23%, list=23%, signal=30%
GOBP_REGULATION_OF_CILIUM_MOVEMENT	GOBP_REGULATION_OF_CILIUM_MOVEMENT	25	0.577207	1.30818	0.142308	0.220787	1	1111	tags=24%, list=7%, signal=26%
GOBP_LONG_TERM_SYNAPTIC_DEPRESSION	GOBP_LONG_TERM_SYNAPTIC_DEPRESSION	28	0.53831	1.3076	0.103586	0.221334	1	3096	tags=43%, list=20%, signal=54%
GOBP_POSITIVE_REGULATION_OF_PROTEIN_MATURATION	GOBP_POSITIVE_REGULATION_OF_PROTEIN_MATURATION	23	0.451624	1.30654	0.109278	0.222488	1	2452	tags=26%, list=16%, signal=31%
GOBP_RESPONSE_TO_AMPHETAMINE	GOBP_RESPONSE_TO_AMPHETAMINE	27	0.538967	1.30638	0.140873	0.222516	1	3854	tags=48%, list=25%, signal=64%
GOBP_AXON_DEVELOPMENT	GOBP_AXON_DEVELOPMENT	449	0.385525	1.30637	0.0766283	0.222415	1	3600	tags=33%, list=23%, signal=41%
GOBP_REGULATION_OF_MYOTUBE_DIFFERENTIATION	GOBP_REGULATION_OF_MYOTUBE_DIFFERENTIATION	39	0.444963	1.3053	0.133201	0.223499	1	2812	tags=23%, list=18%, signal=28%
GOBP_REGULATION_OF_ORGANELLE_ASSEMBLY	GOBP_REGULATION_OF_ORGANELLE_ASSEMBLY	206	0.264533	1.30503	0.0882957	0.223711	1	4936	tags=31%, list=32%, signal=45%
GOBP_BONE_DEVELOPMENT	GOBP_BONE_DEVELOPMENT	202	0.385632	1.30482	0.118577	0.223822	1	4470	tags=42%, list=29%, signal=58%
GOBP_PERICARDIUM_DEVELOPMENT	GOBP_PERICARDIUM_DEVELOPMENT	18	0.530541	1.3048	0.101031	0.223715	1	3385	tags=39%, list=22%, signal=50%
GOBP_RESPONSE_TO_ISOQUINOLINE_ALKALOID	GOBP_RESPONSE_TO_ISOQUINOLINE_ALKALOID	28	0.503758	1.30476	0.120155	0.22363	1	1737	tags=29%, list=11%, signal=32%
GOBP_TRABECULA_FORMATION	GOBP_TRABECULA_FORMATION	24	0.529432	1.30468	0.144016	0.223596	1	2418	tags=33%, list=16%, signal=40%
GOBP_MUSCLE_ORGAN_MORPHOGENESIS	GOBP_MUSCLE_ORGAN_MORPHOGENESIS	77	0.443614	1.30462	0.100402	0.223524	1	3440	tags=39%, list=22%, signal=50%
GOBP_MORPHOGENESIS_OF_A_BRANCHING_STRUCTURE	GOBP_MORPHOGENESIS_OF_A_BRANCHING_STRUCTURE	192	0.409865	1.3044	0.0978474	0.223658	1	3385	tags=33%, list=22%, signal=42%
GOBP_REGULATION_OF_BONE_RESORPTION	GOBP_REGULATION_OF_BONE_RESORPTION	39	0.484229	1.30439	0.108911	0.223545	1	4274	tags=59%, list=28%, signal=82%
GOBP_AMINE_METABOLIC_PROCESS	GOBP_AMINE_METABOLIC_PROCESS	111	0.40939	1.3035	0.0641283	0.224403	1	2972	tags=30%, list=19%, signal=37%
GOBP_PROTEIN_LOCALIZATION_TO_VACUOLE	GOBP_PROTEIN_LOCALIZATION_TO_VACUOLE	62	0.292938	1.30323	0.175258	0.224583	1	5939	tags=45%, list=39%, signal=73%
GOBP_NEGATIVE_REGULATION_OF_ENDOPLASMIC_RETICULUM_STRESS_INDUCED_INTRINSIC_APOPTOTIC_SIGNALING_PATHWAY	GOBP_NEGATIVE_REGULATION_OF_ENDOPLASMIC_RETICULUM_STRESS_INDUCED_INTRINSIC_APOPTOTIC_SIGNALING_PATHWAY	16	0.444423	1.30266	0.196116	0.225123	1	3964	tags=25%, list=26%, signal=34%
GOBP_POSITIVE_REGULATION_OF_CELL_JUNCTION_ASSEMBLY	GOBP_POSITIVE_REGULATION_OF_CELL_JUNCTION_ASSEMBLY	96	0.45215	1.30165	0.109848	0.226164	1	4124	tags=39%, list=27%, signal=52%
GOBP_NEGATIVE_REGULATION_OF_APOPTOTIC_SIGNALING_PATHWAY	GOBP_NEGATIVE_REGULATION_OF_APOPTOTIC_SIGNALING_PATHWAY	199	0.312309	1.30111	0.0873016	0.22665	1	3756	tags=21%, list=24%, signal=28%
GOBP_POSITIVE_REGULATION_OF_OSTEOCLAST_DIFFERENTIATION	GOBP_POSITIVE_REGULATION_OF_OSTEOCLAST_DIFFERENTIATION	23	0.538167	1.30105	0.148496	0.226589	1	3758	tags=65%, list=24%, signal=86%
GOBP_REGULATION_OF_RECEPTOR_BINDING	GOBP_REGULATION_OF_RECEPTOR_BINDING	21	0.530657	1.30104	0.117409	0.226462	1	4324	tags=43%, list=28%, signal=60%
GOBP_MAMMARY_GLAND_ALVEOLUS_DEVELOPMENT	GOBP_MAMMARY_GLAND_ALVEOLUS_DEVELOPMENT	18	0.553608	1.30031	0.127953	0.227193	1	3610	tags=50%, list=24%, signal=65%
GOBP_NUCLEAR_TRANSCRIBED_MRNA_POLY_A_TAIL_SHORTENING	GOBP_NUCLEAR_TRANSCRIBED_MRNA_POLY_A_TAIL_SHORTENING	23	0.384614	1.30013	0.206349	0.227282	1	5594	tags=43%, list=36%, signal=68%
GOBP_POSITIVE_REGULATION_OF_DENDRITE_DEVELOPMENT	GOBP_POSITIVE_REGULATION_OF_DENDRITE_DEVELOPMENT	15	0.603083	1.29999	0.129666	0.227302	1	2629	tags=47%, list=17%, signal=56%
GOBP_RESPONSE_TO_ANTIBIOTIC	GOBP_RESPONSE_TO_ANTIBIOTIC	45	0.36186	1.29995	0.123232	0.227213	1	3807	tags=36%, list=25%, signal=47%
GOBP_RESPIRATORY_SYSTEM_PROCESS	GOBP_RESPIRATORY_SYSTEM_PROCESS	34	0.479128	1.29901	0.154618	0.228207	1	3286	tags=41%, list=21%, signal=52%
GOBP_REGULATION_OF_CYTOPLASMIC_TRANSPORT	GOBP_REGULATION_OF_CYTOPLASMIC_TRANSPORT	23	0.383141	1.29862	0.176471	0.228556	1	789	tags=9%, list=5%, signal=9%
GOBP_CELLULAR_RESPONSE_TO_NUTRIENT	GOBP_CELLULAR_RESPONSE_TO_NUTRIENT	40	0.452589	1.29858	0.0877863	0.228473	1	1928	tags=25%, list=13%, signal=29%
GOBP_TRANSFORMING_GROWTH_FACTOR_BETA_PRODUCTION	GOBP_TRANSFORMING_GROWTH_FACTOR_BETA_PRODUCTION	38	0.457228	1.29818	0.131313	0.2288	1	2927	tags=34%, list=19%, signal=42%
GOBP_REGULATION_OF_VASCULAR_PERMEABILITY	GOBP_REGULATION_OF_VASCULAR_PERMEABILITY	46	0.476503	1.29757	0.133612	0.229367	1	1542	tags=22%, list=10%, signal=24%
GOBP_ORGANIC_HYDROXY_COMPOUND_TRANSPORT	GOBP_ORGANIC_HYDROXY_COMPOUND_TRANSPORT	248	0.403865	1.2975	0.0449438	0.229315	1	3300	tags=31%, list=21%, signal=39%
GOBP_SULFATION	GOBP_SULFATION	19	0.581137	1.29709	0.136986	0.229649	1	3373	tags=58%, list=22%, signal=74%
GOBP_POSITIVE_REGULATION_OF_LONG_TERM_SYNAPTIC_POTENTIATION	GOBP_POSITIVE_REGULATION_OF_LONG_TERM_SYNAPTIC_POTENTIATION	20	0.518079	1.29695	0.150602	0.229686	1	2964	tags=30%, list=19%, signal=37%
GOBP_GOLGI_TO_PLASMA_MEMBRANE_TRANSPORT	GOBP_GOLGI_TO_PLASMA_MEMBRANE_TRANSPORT	57	0.279483	1.29611	0.151064	0.230546	1	4931	tags=32%, list=32%, signal=46%
GOBP_CELL_CELL_SIGNALING_BY_WNT	GOBP_CELL_CELL_SIGNALING_BY_WNT	404	0.340485	1.29604	0.0819672	0.230478	1	4479	tags=35%, list=29%, signal=48%
GOBP_PROTEIN_LOCALIZATION_TO_LYSOSOME	GOBP_PROTEIN_LOCALIZATION_TO_LYSOSOME	40	0.34146	1.29533	0.174168	0.231168	1	5939	tags=50%, list=39%, signal=81%
GOBP_INTRINSIC_APOPTOTIC_SIGNALING_PATHWAY_IN_RESPONSE_TO_DNA_DAMAGE_BY_P53_CLASS_MEDIATOR	GOBP_INTRINSIC_APOPTOTIC_SIGNALING_PATHWAY_IN_RESPONSE_TO_DNA_DAMAGE_BY_P53_CLASS_MEDIATOR	39	0.346736	1.29492	0.152439	0.231528	1	5071	tags=46%, list=33%, signal=69%
GOBP_CELLULAR_COMPONENT_DISASSEMBLY_INVOLVED_IN_EXECUTION_PHASE_OF_APOPTOSIS	GOBP_CELLULAR_COMPONENT_DISASSEMBLY_INVOLVED_IN_EXECUTION_PHASE_OF_APOPTOSIS	26	0.459787	1.2946	0.119141	0.231769	1	52	tags=8%, list=0%, signal=8%
GOBP_RIBOSE_PHOSPHATE_METABOLIC_PROCESS	GOBP_RIBOSE_PHOSPHATE_METABOLIC_PROCESS	330	0.298326	1.29373	0.0575397	0.232694	1	3073	tags=20%, list=20%, signal=24%
GOBP_CELL_SURFACE_RECEPTOR_SIGNALING_PATHWAY_INVOLVED_IN_HEART_DEVELOPMENT	GOBP_CELL_SURFACE_RECEPTOR_SIGNALING_PATHWAY_INVOLVED_IN_HEART_DEVELOPMENT	29	0.504348	1.29328	0.130252	0.23308	1	4861	tags=55%, list=32%, signal=81%
GOBP_NEURON_PROJECTION_EXTENSION_INVOLVED_IN_NEURON_PROJECTION_GUIDANCE	GOBP_NEURON_PROJECTION_EXTENSION_INVOLVED_IN_NEURON_PROJECTION_GUIDANCE	35	0.497675	1.29304	0.135524	0.233224	1	3409	tags=43%, list=22%, signal=55%
GOBP_SMOOTH_MUSCLE_TISSUE_DEVELOPMENT	GOBP_SMOOTH_MUSCLE_TISSUE_DEVELOPMENT	22	0.51934	1.29303	0.150515	0.233105	1	3236	tags=41%, list=21%, signal=52%
GOBP_RESPONSE_TO_LECTIN	GOBP_RESPONSE_TO_LECTIN	19	0.548297	1.29296	0.192079	0.233062	1	3839	tags=47%, list=25%, signal=63%
GOBP_CELL_SURFACE_RECEPTOR_SIGNALING_PATHWAY_INVOLVED_IN_CELL_CELL_SIGNALING	GOBP_CELL_SURFACE_RECEPTOR_SIGNALING_PATHWAY_INVOLVED_IN_CELL_CELL_SIGNALING	493	0.343141	1.29293	0.0704225	0.232951	1	3417	tags=26%, list=22%, signal=33%
GOBP_REGULATION_OF_MEMBRANE_POTENTIAL	GOBP_REGULATION_OF_MEMBRANE_POTENTIAL	387	0.394959	1.29283	0.0611855	0.232919	1	2448	tags=23%, list=16%, signal=26%
GOBP_NEGATIVE_REGULATION_OF_LIPID_METABOLIC_PROCESS	GOBP_NEGATIVE_REGULATION_OF_LIPID_METABOLIC_PROCESS	84	0.40311	1.29269	0.0910891	0.232948	1	3882	tags=38%, list=25%, signal=51%
GOBP_CARDIAC_MUSCLE_CELL_ACTION_POTENTIAL_INVOLVED_IN_CONTRACTION	GOBP_CARDIAC_MUSCLE_CELL_ACTION_POTENTIAL_INVOLVED_IN_CONTRACTION	48	0.484595	1.29257	0.129412	0.232965	1	2387	tags=33%, list=16%, signal=39%
GOBP_ORGANELLE_MEMBRANE_FUSION	GOBP_ORGANELLE_MEMBRANE_FUSION	95	0.328605	1.29171	0.115686	0.233878	1	5373	tags=46%, list=35%, signal=71%
GOBP_RESPONSE_TO_OXYGEN_RADICAL	GOBP_RESPONSE_TO_OXYGEN_RADICAL	24	0.422516	1.29127	0.157895	0.234296	1	1700	tags=17%, list=11%, signal=19%
GOBP_NEGATIVE_REGULATION_OF_BINDING	GOBP_NEGATIVE_REGULATION_OF_BINDING	150	0.332623	1.29105	0.0689655	0.234445	1	2925	tags=21%, list=19%, signal=26%
GOBP_MORPHOGENESIS_OF_AN_EPITHELIAL_SHEET	GOBP_MORPHOGENESIS_OF_AN_EPITHELIAL_SHEET	53	0.407992	1.29097	0.145418	0.234404	1	4816	tags=40%, list=31%, signal=58%
GOBP_NEGATIVE_REGULATION_OF_PROTEOLYSIS	GOBP_NEGATIVE_REGULATION_OF_PROTEOLYSIS	295	0.371773	1.2905	0.0629921	0.234786	1	3371	tags=30%, list=22%, signal=37%
GOBP_POSITIVE_REGULATION_OF_VACUOLE_ORGANIZATION	GOBP_POSITIVE_REGULATION_OF_VACUOLE_ORGANIZATION	19	0.356172	1.29029	0.172962	0.234907	1	2846	tags=21%, list=19%, signal=26%
GOBP_REGULATION_OF_DNA_TEMPLATED_TRANSCRIPTION_IN_RESPONSE_TO_STRESS	GOBP_REGULATION_OF_DNA_TEMPLATED_TRANSCRIPTION_IN_RESPONSE_TO_STRESS	50	0.327446	1.29014	0.158824	0.234959	1	4748	tags=34%, list=31%, signal=49%
GOBP_CHONDROITIN_SULFATE_PROTEOGLYCAN_BIOSYNTHETIC_PROCESS	GOBP_CHONDROITIN_SULFATE_PROTEOGLYCAN_BIOSYNTHETIC_PROCESS	22	0.496505	1.29005	0.182752	0.234926	1	4272	tags=45%, list=28%, signal=63%
GOBP_REGULATION_OF_VASOCONSTRICTION	GOBP_REGULATION_OF_VASOCONSTRICTION	61	0.502511	1.28982	0.132673	0.235064	1	2516	tags=33%, list=16%, signal=39%
GOBP_EMBRYONIC_HEART_TUBE_DEVELOPMENT	GOBP_EMBRYONIC_HEART_TUBE_DEVELOPMENT	77	0.375116	1.28859	0.102041	0.236342	1	4378	tags=40%, list=29%, signal=56%
GOBP_REGULATION_OF_INSULIN_RECEPTOR_SIGNALING_PATHWAY	GOBP_REGULATION_OF_INSULIN_RECEPTOR_SIGNALING_PATHWAY	56	0.369495	1.28839	0.123482	0.236421	1	4645	tags=38%, list=30%, signal=54%
GOBP_REGULATION_OF_PROTEASOMAL_PROTEIN_CATABOLIC_PROCESS	GOBP_REGULATION_OF_PROTEASOMAL_PROTEIN_CATABOLIC_PROCESS	167	0.226125	1.28796	0.112474	0.236817	1	2005	tags=10%, list=13%, signal=12%
GOBP_POSITIVE_REGULATION_OF_LYMPHOCYTE_CHEMOTAXIS	GOBP_POSITIVE_REGULATION_OF_LYMPHOCYTE_CHEMOTAXIS	16	0.569953	1.28747	0.17154	0.237285	1	2953	tags=44%, list=19%, signal=54%
GOBP_VENTRICULAR_CARDIAC_MUSCLE_TISSUE_DEVELOPMENT	GOBP_VENTRICULAR_CARDIAC_MUSCLE_TISSUE_DEVELOPMENT	56	0.433594	1.28711	0.101215	0.237568	1	3440	tags=39%, list=22%, signal=50%
GOBP_PROSTANOID_BIOSYNTHETIC_PROCESS	GOBP_PROSTANOID_BIOSYNTHETIC_PROCESS	28	0.50803	1.28682	0.143141	0.237806	1	3363	tags=46%, list=22%, signal=59%
GOBP_POTASSIUM_ION_TRANSPORT	GOBP_POTASSIUM_ION_TRANSPORT	220	0.40624	1.28644	0.0542636	0.23809	1	3001	tags=29%, list=20%, signal=36%
GOBP_GLYCOSAMINOGLYCAN_CATABOLIC_PROCESS	GOBP_GLYCOSAMINOGLYCAN_CATABOLIC_PROCESS	24	0.473715	1.286	0.123203	0.23845	1	2943	tags=33%, list=19%, signal=41%
GOBP_REGULATION_OF_NEUROTRANSMITTER_RECEPTOR_ACTIVITY	GOBP_REGULATION_OF_NEUROTRANSMITTER_RECEPTOR_ACTIVITY	57	0.46571	1.28581	0.108055	0.238532	1	2964	tags=26%, list=19%, signal=32%
GOBP_CELLULAR_RESPONSE_TO_OSMOTIC_STRESS	GOBP_CELLULAR_RESPONSE_TO_OSMOTIC_STRESS	39	0.406053	1.28566	0.140756	0.238599	1	4375	tags=41%, list=28%, signal=57%
GOBP_NEGATIVE_REGULATION_OF_CYCLIN_DEPENDENT_PROTEIN_SERINE_THREONINE_KINASE_ACTIVITY	GOBP_NEGATIVE_REGULATION_OF_CYCLIN_DEPENDENT_PROTEIN_SERINE_THREONINE_KINASE_ACTIVITY	28	0.407417	1.28494	0.15625	0.239313	1	3710	tags=32%, list=24%, signal=42%
GOBP_AMINO_SUGAR_METABOLIC_PROCESS	GOBP_AMINO_SUGAR_METABOLIC_PROCESS	38	0.418701	1.28424	0.121019	0.240077	1	4102	tags=39%, list=27%, signal=54%
GOBP_PROTEOGLYCAN_BIOSYNTHETIC_PROCESS	GOBP_PROTEOGLYCAN_BIOSYNTHETIC_PROCESS	55	0.411733	1.28354	0.142553	0.240757	1	3432	tags=31%, list=22%, signal=40%
GOBP_PHYSIOLOGICAL_CARDIAC_MUSCLE_HYPERTROPHY	GOBP_PHYSIOLOGICAL_CARDIAC_MUSCLE_HYPERTROPHY	20	0.506965	1.28316	0.144898	0.241077	1	3922	tags=50%, list=26%, signal=67%
GOBP_INTRINSIC_APOPTOTIC_SIGNALING_PATHWAY_IN_RESPONSE_TO_DNA_DAMAGE	GOBP_INTRINSIC_APOPTOTIC_SIGNALING_PATHWAY_IN_RESPONSE_TO_DNA_DAMAGE	93	0.328237	1.28277	0.169811	0.241384	1	3852	tags=28%, list=25%, signal=37%
GOBP_ENDOMEMBRANE_SYSTEM_ORGANIZATION	GOBP_ENDOMEMBRANE_SYSTEM_ORGANIZATION	452	0.24012	1.28249	0.055102	0.241602	1	4384	tags=23%, list=29%, signal=32%
GOBP_PEPTIDE_CATABOLIC_PROCESS	GOBP_PEPTIDE_CATABOLIC_PROCESS	22	0.456443	1.2824	0.153535	0.241568	1	2780	tags=41%, list=18%, signal=50%
GOBP_REGULATION_OF_CELL_ADHESION_MEDIATED_BY_INTEGRIN	GOBP_REGULATION_OF_CELL_ADHESION_MEDIATED_BY_INTEGRIN	46	0.445321	1.28207	0.136456	0.241862	1	3822	tags=43%, list=25%, signal=58%
GOBP_OSTEOBLAST_PROLIFERATION	GOBP_OSTEOBLAST_PROLIFERATION	29	0.522351	1.28	0.178279	0.244278	1	3410	tags=45%, list=22%, signal=58%
GOBP_SUBSTANTIA_NIGRA_DEVELOPMENT	GOBP_SUBSTANTIA_NIGRA_DEVELOPMENT	39	0.424583	1.2793	0.150301	0.244981	1	1551	tags=18%, list=10%, signal=20%
GOBP_SCHWANN_CELL_DIFFERENTIATION	GOBP_SCHWANN_CELL_DIFFERENTIATION	34	0.421998	1.27929	0.158215	0.24487	1	3977	tags=32%, list=26%, signal=44%
GOBP_SCHWANN_CELL_DEVELOPMENT	GOBP_SCHWANN_CELL_DEVELOPMENT	28	0.446787	1.27903	0.179487	0.245011	1	4304	tags=36%, list=28%, signal=50%
GOBP_FIBROBLAST_PROLIFERATION	GOBP_FIBROBLAST_PROLIFERATION	75	0.378194	1.27894	0.17551	0.244969	1	5071	tags=48%, list=33%, signal=71%
GOBP_IRON_ION_TRANSMEMBRANE_TRANSPORT	GOBP_IRON_ION_TRANSMEMBRANE_TRANSPORT	21	0.453875	1.27881	0.166994	0.244974	1	4324	tags=52%, list=28%, signal=73%
GOBP_ACTIVATION_OF_ADENYLATE_CYCLASE_ACTIVITY	GOBP_ACTIVATION_OF_ADENYLATE_CYCLASE_ACTIVITY	26	0.521509	1.27855	0.109344	0.245169	1	1502	tags=27%, list=10%, signal=30%
GOBP_OSTEOCLAST_DEVELOPMENT	GOBP_OSTEOCLAST_DEVELOPMENT	18	0.534688	1.27817	0.180747	0.245518	1	4171	tags=61%, list=27%, signal=84%
GOBP_NEGATIVE_REGULATION_OF_EPITHELIAL_TO_MESENCHYMAL_TRANSITION	GOBP_NEGATIVE_REGULATION_OF_EPITHELIAL_TO_MESENCHYMAL_TRANSITION	33	0.474291	1.27807	0.169772	0.24549	1	3275	tags=42%, list=21%, signal=54%
GOBP_CELLULAR_RESPONSE_TO_CAMP	GOBP_CELLULAR_RESPONSE_TO_CAMP	51	0.425693	1.27792	0.100569	0.245553	1	2660	tags=33%, list=17%, signal=40%
GOBP_CELLULAR_RESPONSE_TO_PEPTIDE_HORMONE_STIMULUS	GOBP_CELLULAR_RESPONSE_TO_PEPTIDE_HORMONE_STIMULUS	262	0.326475	1.27788	0.0792079	0.245477	1	5035	tags=39%, list=33%, signal=57%
GOBP_REGULATION_OF_CELL_FATE_COMMITMENT	GOBP_REGULATION_OF_CELL_FATE_COMMITMENT	24	0.520021	1.27755	0.112676	0.245732	1	4418	tags=58%, list=29%, signal=82%
GOBP_REGULATION_OF_URINE_VOLUME	GOBP_REGULATION_OF_URINE_VOLUME	19	0.516595	1.27754	0.128713	0.245607	1	5000	tags=58%, list=33%, signal=86%
GOBP_DEVELOPMENTAL_MATURATION	GOBP_DEVELOPMENTAL_MATURATION	264	0.37094	1.27745	0.0587084	0.245599	1	3196	tags=28%, list=21%, signal=35%
GOBP_REGULATION_OF_BMP_SIGNALING_PATHWAY	GOBP_REGULATION_OF_BMP_SIGNALING_PATHWAY	93	0.436498	1.27723	0.139959	0.245731	1	4037	tags=37%, list=26%, signal=49%
GOBP_POSITIVE_REGULATION_OF_ERBB_SIGNALING_PATHWAY	GOBP_POSITIVE_REGULATION_OF_ERBB_SIGNALING_PATHWAY	31	0.465643	1.27697	0.141199	0.245913	1	2794	tags=35%, list=18%, signal=43%
GOBP_REGULATION_OF_TRANS_SYNAPTIC_SIGNALING	GOBP_REGULATION_OF_TRANS_SYNAPTIC_SIGNALING	390	0.399686	1.27623	0.0940959	0.24668	1	3560	tags=31%, list=23%, signal=39%
GOBP_REGULATION_OF_SODIUM_ION_TRANSMEMBRANE_TRANSPORT	GOBP_REGULATION_OF_SODIUM_ION_TRANSMEMBRANE_TRANSPORT	61	0.443935	1.27604	0.145455	0.246759	1	3397	tags=38%, list=22%, signal=48%
GOBP_NEGATIVE_REGULATION_OF_WNT_SIGNALING_PATHWAY	GOBP_NEGATIVE_REGULATION_OF_WNT_SIGNALING_PATHWAY	151	0.390968	1.27589	0.121457	0.246808	1	3829	tags=34%, list=25%, signal=45%
GOBP_ACTION_POTENTIAL	GOBP_ACTION_POTENTIAL	131	0.435205	1.27584	0.103586	0.246724	1	2387	tags=27%, list=16%, signal=32%
GOBP_NEGATIVE_REGULATION_OF_CELL_GROWTH	GOBP_NEGATIVE_REGULATION_OF_CELL_GROWTH	169	0.36519	1.27568	0.135029	0.246793	1	4429	tags=39%, list=29%, signal=54%
GOBP_REGULATION_OF_PLATELET_DERIVED_GROWTH_FACTOR_RECEPTOR_SIGNALING_PATHWAY	GOBP_REGULATION_OF_PLATELET_DERIVED_GROWTH_FACTOR_RECEPTOR_SIGNALING_PATHWAY	22	0.450749	1.27559	0.156436	0.246755	1	4475	tags=45%, list=29%, signal=64%
GOBP_REGULATION_OF_EPITHELIAL_TO_MESENCHYMAL_TRANSITION	GOBP_REGULATION_OF_EPITHELIAL_TO_MESENCHYMAL_TRANSITION	89	0.406802	1.27495	0.138211	0.247365	1	3912	tags=39%, list=25%, signal=52%
GOBP_PLASMA_MEMBRANE_TUBULATION	GOBP_PLASMA_MEMBRANE_TUBULATION	18	0.41781	1.27491	0.211066	0.24728	1	3554	tags=28%, list=23%, signal=36%
GOBP_PERIPHERAL_NERVOUS_SYSTEM_DEVELOPMENT	GOBP_PERIPHERAL_NERVOUS_SYSTEM_DEVELOPMENT	71	0.434944	1.27482	0.0996016	0.247244	1	1268	tags=18%, list=8%, signal=20%
GOBP_FOREBRAIN_CELL_MIGRATION	GOBP_FOREBRAIN_CELL_MIGRATION	60	0.434845	1.27471	0.137931	0.247237	1	3241	tags=30%, list=21%, signal=38%
GOBP_CELLULAR_RESPONSE_TO_EXTRACELLULAR_STIMULUS	GOBP_CELLULAR_RESPONSE_TO_EXTRACELLULAR_STIMULUS	219	0.303033	1.27344	0.105882	0.248647	1	4606	tags=30%, list=30%, signal=42%
GOBP_REGULATION_OF_UBIQUITIN_DEPENDENT_PROTEIN_CATABOLIC_PROCESS	GOBP_REGULATION_OF_UBIQUITIN_DEPENDENT_PROTEIN_CATABOLIC_PROCESS	151	0.243701	1.2726	0.120902	0.249518	1	4985	tags=29%, list=32%, signal=43%
GOBP_MYELIN_ASSEMBLY	GOBP_MYELIN_ASSEMBLY	19	0.476255	1.27221	0.166341	0.249845	1	3856	tags=37%, list=25%, signal=49%
GOBP_ACIDIC_AMINO_ACID_TRANSPORT	GOBP_ACIDIC_AMINO_ACID_TRANSPORT	62	0.449111	1.27201	0.130604	0.24995	1	1644	tags=19%, list=11%, signal=22%
GOBP_REGULATION_OF_ANIMAL_ORGAN_MORPHOGENESIS	GOBP_REGULATION_OF_ANIMAL_ORGAN_MORPHOGENESIS	124	0.443473	1.27175	0.134694	0.250132	1	3417	tags=38%, list=22%, signal=48%
GOBP_STEM_CELL_DIFFERENTIATION	GOBP_STEM_CELL_DIFFERENTIATION	206	0.385643	1.2712	0.1222	0.250723	1	3349	tags=29%, list=22%, signal=36%
GOBP_MAINTENANCE_OF_PROTEIN_LOCATION_IN_NUCLEUS	GOBP_MAINTENANCE_OF_PROTEIN_LOCATION_IN_NUCLEUS	23	0.314405	1.27087	0.167339	0.251003	1	3687	tags=22%, list=24%, signal=29%
GOBP_UNSATURATED_FATTY_ACID_BIOSYNTHETIC_PROCESS	GOBP_UNSATURATED_FATTY_ACID_BIOSYNTHETIC_PROCESS	47	0.442515	1.27038	0.0941884	0.251475	1	3503	tags=40%, list=23%, signal=52%
GOBP_NEGATIVE_REGULATION_OF_SODIUM_ION_TRANSPORT	GOBP_NEGATIVE_REGULATION_OF_SODIUM_ION_TRANSPORT	18	0.503448	1.27028	0.141176	0.251471	1	1695	tags=22%, list=11%, signal=25%
GOBP_PROTEOGLYCAN_METABOLIC_PROCESS	GOBP_PROTEOGLYCAN_METABOLIC_PROCESS	76	0.398133	1.27026	0.133466	0.251343	1	3432	tags=30%, list=22%, signal=39%
GOBP_RIBONUCLEOSIDE_TRIPHOSPHATE_METABOLIC_PROCESS	GOBP_RIBONUCLEOSIDE_TRIPHOSPHATE_METABOLIC_PROCESS	54	0.316114	1.26954	0.167984	0.252151	1	798	tags=9%, list=5%, signal=10%
GOBP_ENERGY_RESERVE_METABOLIC_PROCESS	GOBP_ENERGY_RESERVE_METABOLIC_PROCESS	73	0.353223	1.26933	0.119919	0.252302	1	2665	tags=19%, list=17%, signal=23%
GOBP_REGULATION_OF_LYASE_ACTIVITY	GOBP_REGULATION_OF_LYASE_ACTIVITY	45	0.431132	1.26892	0.0992218	0.252661	1	3612	tags=31%, list=24%, signal=41%
GOBP_CARBOHYDRATE_TRANSPORT	GOBP_CARBOHYDRATE_TRANSPORT	135	0.362505	1.26865	0.11134	0.252833	1	3321	tags=27%, list=22%, signal=34%
GOBP_MORPHOGENESIS_OF_AN_EPITHELIAL_FOLD	GOBP_MORPHOGENESIS_OF_AN_EPITHELIAL_FOLD	23	0.519911	1.26857	0.157143	0.252822	1	3136	tags=48%, list=20%, signal=60%
GOBP_NEUTRAL_LIPID_METABOLIC_PROCESS	GOBP_NEUTRAL_LIPID_METABOLIC_PROCESS	115	0.394197	1.26768	0.101961	0.253755	1	2931	tags=29%, list=19%, signal=35%
GOBP_NUCLEOTIDE_TRANSPORT	GOBP_NUCLEOTIDE_TRANSPORT	36	0.358524	1.26762	0.17505	0.253696	1	4917	tags=31%, list=32%, signal=45%
GOBP_INTEGRIN_ACTIVATION	GOBP_INTEGRIN_ACTIVATION	26	0.508797	1.26755	0.17364	0.253638	1	2661	tags=42%, list=17%, signal=51%
GOBP_REGULATION_OF_RESPIRATORY_BURST	GOBP_REGULATION_OF_RESPIRATORY_BURST	15	0.522165	1.26649	0.232653	0.254846	1	2907	tags=40%, list=19%, signal=49%
GOBP_MORPHOGENESIS_OF_A_POLARIZED_EPITHELIUM	GOBP_MORPHOGENESIS_OF_A_POLARIZED_EPITHELIUM	93	0.386584	1.26635	0.127932	0.254856	1	3417	tags=29%, list=22%, signal=37%
GOBP_FATTY_ACID_BIOSYNTHETIC_PROCESS	GOBP_FATTY_ACID_BIOSYNTHETIC_PROCESS	140	0.371917	1.26632	0.0796813	0.254763	1	3984	tags=34%, list=26%, signal=46%
GOBP_POSITIVE_REGULATION_OF_POTASSIUM_ION_TRANSPORT	GOBP_POSITIVE_REGULATION_OF_POTASSIUM_ION_TRANSPORT	44	0.485653	1.26619	0.10728	0.254768	1	2394	tags=39%, list=16%, signal=46%
GOBP_MITOCHONDRIAL_DEPOLARIZATION	GOBP_MITOCHONDRIAL_DEPOLARIZATION	19	0.480079	1.26616	0.161554	0.254662	1	3331	tags=42%, list=22%, signal=54%
GOBP_SKELETAL_MUSCLE_TISSUE_REGENERATION	GOBP_SKELETAL_MUSCLE_TISSUE_REGENERATION	31	0.395061	1.2661	0.152941	0.254611	1	3118	tags=32%, list=20%, signal=40%
GOBP_POSITIVE_REGULATION_OF_ANIMAL_ORGAN_MORPHOGENESIS	GOBP_POSITIVE_REGULATION_OF_ANIMAL_ORGAN_MORPHOGENESIS	33	0.539808	1.26582	0.130522	0.254792	1	3385	tags=55%, list=22%, signal=70%
GOBP_CYCLIC_NUCLEOTIDE_METABOLIC_PROCESS	GOBP_CYCLIC_NUCLEOTIDE_METABOLIC_PROCESS	36	0.474258	1.26558	0.143396	0.254975	1	3816	tags=47%, list=25%, signal=63%
GOBP_REGULATION_OF_PROTEIN_MODIFICATION_BY_SMALL_PROTEIN_CONJUGATION_OR_REMOVAL	GOBP_REGULATION_OF_PROTEIN_MODIFICATION_BY_SMALL_PROTEIN_CONJUGATION_OR_REMOVAL	217	0.234059	1.26481	0.11875	0.255718	1	2093	tags=11%, list=14%, signal=13%
GOBP_GLYCEROLIPID_CATABOLIC_PROCESS	GOBP_GLYCEROLIPID_CATABOLIC_PROCESS	62	0.426577	1.2648	0.125	0.255599	1	3091	tags=35%, list=20%, signal=44%
GOBP_RESPONSE_TO_HYPEROXIA	GOBP_RESPONSE_TO_HYPEROXIA	18	0.495704	1.26478	0.197581	0.25548	1	3826	tags=44%, list=25%, signal=59%
GOBP_ERBB_SIGNALING_PATHWAY	GOBP_ERBB_SIGNALING_PATHWAY	107	0.352954	1.26466	0.121514	0.255481	1	2936	tags=25%, list=19%, signal=31%
GOBP_REGULATION_OF_NUCLEOTIDE_METABOLIC_PROCESS	GOBP_REGULATION_OF_NUCLEOTIDE_METABOLIC_PROCESS	76	0.388657	1.26425	0.129412	0.255835	1	3073	tags=24%, list=20%, signal=29%
GOBP_EXTRINSIC_APOPTOTIC_SIGNALING_PATHWAY_VIA_DEATH_DOMAIN_RECEPTORS	GOBP_EXTRINSIC_APOPTOTIC_SIGNALING_PATHWAY_VIA_DEATH_DOMAIN_RECEPTORS	76	0.379737	1.26403	0.176938	0.255956	1	3474	tags=26%, list=23%, signal=34%
GOBP_REGULATION_OF_KERATINOCYTE_PROLIFERATION	GOBP_REGULATION_OF_KERATINOCYTE_PROLIFERATION	32	0.448387	1.2632	0.135496	0.256872	1	4365	tags=47%, list=28%, signal=65%
GOBP_REGULATION_OF_LIPID_BIOSYNTHETIC_PROCESS	GOBP_REGULATION_OF_LIPID_BIOSYNTHETIC_PROCESS	153	0.356074	1.26309	0.0782779	0.256887	1	4016	tags=35%, list=26%, signal=46%
GOBP_REGULATION_OF_ANDROGEN_RECEPTOR_SIGNALING_PATHWAY	GOBP_REGULATION_OF_ANDROGEN_RECEPTOR_SIGNALING_PATHWAY	28	0.399406	1.26274	0.198758	0.257143	1	5583	tags=43%, list=36%, signal=67%
GOBP_PEPTIDYL_TYROSINE_DEPHOSPHORYLATION	GOBP_PEPTIDYL_TYROSINE_DEPHOSPHORYLATION	92	0.350333	1.26221	0.111332	0.257683	1	4318	tags=40%, list=28%, signal=56%
GOBP_GAP_JUNCTION_ASSEMBLY	GOBP_GAP_JUNCTION_ASSEMBLY	17	0.573705	1.26176	0.165323	0.258083	1	3717	tags=65%, list=24%, signal=85%
GOBP_POSITIVE_REGULATION_OF_POSTTRANSCRIPTIONAL_GENE_SILENCING	GOBP_POSITIVE_REGULATION_OF_POSTTRANSCRIPTIONAL_GENE_SILENCING	30	0.430364	1.26166	0.185567	0.258067	1	2675	tags=27%, list=17%, signal=32%
GOBP_RESPONSE_TO_FIBROBLAST_GROWTH_FACTOR	GOBP_RESPONSE_TO_FIBROBLAST_GROWTH_FACTOR	102	0.406854	1.26157	0.113821	0.258057	1	3275	tags=29%, list=21%, signal=37%
GOBP_P_BODY_ASSEMBLY	GOBP_P_BODY_ASSEMBLY	19	0.378735	1.26124	0.204322	0.25833	1	3182	tags=16%, list=21%, signal=20%
GOBP_FIBROBLAST_APOPTOTIC_PROCESS	GOBP_FIBROBLAST_APOPTOTIC_PROCESS	20	0.45863	1.26097	0.179435	0.258542	1	4777	tags=50%, list=31%, signal=72%
GOBP_CILIUM_ORGANIZATION	GOBP_CILIUM_ORGANIZATION	318	0.396887	1.26094	0.222437	0.258436	1	4743	tags=38%, list=31%, signal=54%
GOBP_MONOCARBOXYLIC_ACID_BIOSYNTHETIC_PROCESS	GOBP_MONOCARBOXYLIC_ACID_BIOSYNTHETIC_PROCESS	189	0.376567	1.26087	0.093361	0.258392	1	4016	tags=36%, list=26%, signal=48%
GOBP_PYRIDINE_NUCLEOTIDE_METABOLIC_PROCESS	GOBP_PYRIDINE_NUCLEOTIDE_METABOLIC_PROCESS	26	0.470779	1.26031	0.15619	0.258941	1	3014	tags=38%, list=20%, signal=48%
GOBP_NEGATIVE_REGULATION_OF_ACTIN_FILAMENT_POLYMERIZATION	GOBP_NEGATIVE_REGULATION_OF_ACTIN_FILAMENT_POLYMERIZATION	54	0.403835	1.26023	0.168986	0.258902	1	4267	tags=46%, list=28%, signal=64%
GOBP_REGULATION_OF_INTRINSIC_APOPTOTIC_SIGNALING_PATHWAY	GOBP_REGULATION_OF_INTRINSIC_APOPTOTIC_SIGNALING_PATHWAY	146	0.284323	1.26017	0.157371	0.258841	1	4825	tags=27%, list=31%, signal=40%
GOBP_NEGATIVE_REGULATION_OF_SIGNALING_RECEPTOR_ACTIVITY	GOBP_NEGATIVE_REGULATION_OF_SIGNALING_RECEPTOR_ACTIVITY	48	0.430486	1.26014	0.134809	0.258745	1	3129	tags=29%, list=20%, signal=37%
GOBP_SPHINGOMYELIN_METABOLIC_PROCESS	GOBP_SPHINGOMYELIN_METABOLIC_PROCESS	18	0.462899	1.26005	0.204819	0.258709	1	5260	tags=50%, list=34%, signal=76%
GOBP_CIRCADIAN_REGULATION_OF_GENE_EXPRESSION	GOBP_CIRCADIAN_REGULATION_OF_GENE_EXPRESSION	61	0.350641	1.26001	0.160714	0.258626	1	3569	tags=26%, list=23%, signal=34%
GOBP_NUCLEOBASE_CONTAINING_SMALL_MOLECULE_CATABOLIC_PROCESS	GOBP_NUCLEOBASE_CONTAINING_SMALL_MOLECULE_CATABOLIC_PROCESS	28	0.466463	1.25999	0.165354	0.258508	1	4327	tags=46%, list=28%, signal=65%
GOBP_MODIFICATION_OF_SYNAPTIC_STRUCTURE	GOBP_MODIFICATION_OF_SYNAPTIC_STRUCTURE	19	0.446213	1.25981	0.217054	0.258585	1	3002	tags=26%, list=20%, signal=33%
GOBP_NEGATIVE_REGULATION_OF_ENDOCYTOSIS	GOBP_NEGATIVE_REGULATION_OF_ENDOCYTOSIS	51	0.374374	1.25975	0.139887	0.258531	1	4950	tags=41%, list=32%, signal=61%
GOBP_CELL_MATURATION	GOBP_CELL_MATURATION	160	0.381543	1.259	0.0710173	0.259346	1	1618	tags=19%, list=11%, signal=21%
GOBP_NEGATIVE_REGULATION_OF_ENDOTHELIAL_CELL_APOPTOTIC_PROCESS	GOBP_NEGATIVE_REGULATION_OF_ENDOTHELIAL_CELL_APOPTOTIC_PROCESS	31	0.517187	1.25896	0.177419	0.259247	1	1593	tags=35%, list=10%, signal=40%
GOBP_RENAL_ABSORPTION	GOBP_RENAL_ABSORPTION	20	0.550328	1.25868	0.194882	0.259476	1	3453	tags=50%, list=22%, signal=64%
GOBP_REGULATION_OF_COAGULATION	GOBP_REGULATION_OF_COAGULATION	68	0.465349	1.25768	0.132039	0.260611	1	3111	tags=46%, list=20%, signal=57%
GOBP_TRIGLYCERIDE_METABOLIC_PROCESS	GOBP_TRIGLYCERIDE_METABOLIC_PROCESS	90	0.409739	1.25713	0.122047	0.261161	1	2375	tags=27%, list=15%, signal=31%
GOBP_CERAMIDE_METABOLIC_PROCESS	GOBP_CERAMIDE_METABOLIC_PROCESS	93	0.348591	1.25711	0.117417	0.261046	1	3557	tags=24%, list=23%, signal=31%
GOBP_REGULATION_OF_CYCLASE_ACTIVITY	GOBP_REGULATION_OF_CYCLASE_ACTIVITY	48	0.432783	1.2569	0.125984	0.261183	1	3525	tags=29%, list=23%, signal=38%
GOBP_SODIUM_ION_TRANSPORT	GOBP_SODIUM_ION_TRANSPORT	225	0.395694	1.25656	0.0785855	0.26149	1	3644	tags=31%, list=24%, signal=40%
GOBP_FORMATION_OF_PRIMARY_GERM_LAYER	GOBP_FORMATION_OF_PRIMARY_GERM_LAYER	109	0.398345	1.25609	0.169422	0.261941	1	3850	tags=31%, list=25%, signal=41%
GOBP_IMPORT_ACROSS_PLASMA_MEMBRANE	GOBP_IMPORT_ACROSS_PLASMA_MEMBRANE	167	0.375934	1.25548	0.0816733	0.262564	1	3676	tags=34%, list=24%, signal=44%
GOBP_FEMALE_GENITALIA_DEVELOPMENT	GOBP_FEMALE_GENITALIA_DEVELOPMENT	16	0.532007	1.25529	0.177778	0.262667	1	2953	tags=44%, list=19%, signal=54%
GOBP_LYSOSOMAL_TRANSPORT	GOBP_LYSOSOMAL_TRANSPORT	111	0.26158	1.25527	0.191837	0.262551	1	5477	tags=33%, list=36%, signal=51%
GOBP_LEUKOTRIENE_METABOLIC_PROCESS	GOBP_LEUKOTRIENE_METABOLIC_PROCESS	27	0.504745	1.25485	0.16501	0.262911	1	2780	tags=37%, list=18%, signal=45%
GOBP_PYRIDINE_NUCLEOTIDE_BIOSYNTHETIC_PROCESS	GOBP_PYRIDINE_NUCLEOTIDE_BIOSYNTHETIC_PROCESS	23	0.494436	1.25481	0.176699	0.262817	1	3014	tags=39%, list=20%, signal=49%
GOBP_PURINE_NUCLEOTIDE_TRANSPORT	GOBP_PURINE_NUCLEOTIDE_TRANSPORT	30	0.372067	1.25434	0.176587	0.263264	1	4917	tags=33%, list=32%, signal=49%
GOBP_CELLULAR_COMPONENT_MAINTENANCE	GOBP_CELLULAR_COMPONENT_MAINTENANCE	56	0.38564	1.25388	0.113546	0.263698	1	2083	tags=20%, list=14%, signal=23%
GOBP_RESPONSE_TO_LEAD_ION	GOBP_RESPONSE_TO_LEAD_ION	20	0.463462	1.2536	0.211382	0.26391	1	5699	tags=60%, list=37%, signal=95%
GOBP_REGULATION_OF_PHOSPHOLIPID_TRANSPORT	GOBP_REGULATION_OF_PHOSPHOLIPID_TRANSPORT	15	0.563338	1.2535	0.188976	0.263894	1	2830	tags=40%, list=18%, signal=49%
GOBP_POSITIVE_REGULATION_OF_FOCAL_ADHESION_ASSEMBLY	GOBP_POSITIVE_REGULATION_OF_FOCAL_ADHESION_ASSEMBLY	26	0.446563	1.25343	0.185336	0.263836	1	4725	tags=42%, list=31%, signal=61%
GOBP_POSITIVE_REGULATION_OF_ORGANELLE_ASSEMBLY	GOBP_POSITIVE_REGULATION_OF_ORGANELLE_ASSEMBLY	74	0.303419	1.25299	0.179226	0.264241	1	3888	tags=24%, list=25%, signal=32%
GOBP_CARDIAC_MUSCLE_CELL_MEMBRANE_REPOLARIZATION	GOBP_CARDIAC_MUSCLE_CELL_MEMBRANE_REPOLARIZATION	34	0.478975	1.25252	0.170588	0.264679	1	2387	tags=29%, list=16%, signal=35%
GOBP_REGULATION_OF_ENDOTHELIAL_CELL_DIFFERENTIATION	GOBP_REGULATION_OF_ENDOTHELIAL_CELL_DIFFERENTIATION	37	0.443474	1.25211	0.193277	0.265046	1	1642	tags=22%, list=11%, signal=24%
GOBP_NEGATIVE_REGULATION_OF_RESPONSE_TO_WOUNDING	GOBP_NEGATIVE_REGULATION_OF_RESPONSE_TO_WOUNDING	85	0.454766	1.25187	0.122288	0.265201	1	3142	tags=41%, list=20%, signal=51%
GOBP_NEURON_RECOGNITION	GOBP_NEURON_RECOGNITION	48	0.488143	1.25153	0.131048	0.265448	1	3316	tags=44%, list=22%, signal=56%
GOBP_POLY_A_PLUS_MRNA_EXPORT_FROM_NUCLEUS	GOBP_POLY_A_PLUS_MRNA_EXPORT_FROM_NUCLEUS	17	0.453377	1.251	0.180747	0.26598	1	1092	tags=12%, list=7%, signal=13%
GOBP_CELLULAR_RESPONSE_TO_INORGANIC_SUBSTANCE	GOBP_CELLULAR_RESPONSE_TO_INORGANIC_SUBSTANCE	195	0.340635	1.2509	0.0717054	0.265949	1	3796	tags=34%, list=25%, signal=44%
GOBP_RESPONSE_TO_EXTRACELLULAR_STIMULUS	GOBP_RESPONSE_TO_EXTRACELLULAR_STIMULUS	440	0.315665	1.24911	0.0849421	0.268007	1	2864	tags=20%, list=19%, signal=24%
GOBP_NON_CANONICAL_WNT_SIGNALING_PATHWAY	GOBP_NON_CANONICAL_WNT_SIGNALING_PATHWAY	70	0.424586	1.24907	0.153518	0.267921	1	3417	tags=34%, list=22%, signal=44%
GOBP_GENITALIA_DEVELOPMENT	GOBP_GENITALIA_DEVELOPMENT	43	0.433182	1.24902	0.114286	0.267854	1	3759	tags=37%, list=24%, signal=49%
GOBP_RESPONSE_TO_ESTRADIOL	GOBP_RESPONSE_TO_ESTRADIOL	114	0.370244	1.24901	0.0998004	0.267716	1	4377	tags=39%, list=29%, signal=55%
GOBP_REGULATION_OF_ESTABLISHMENT_OF_PROTEIN_LOCALIZATION	GOBP_REGULATION_OF_ESTABLISHMENT_OF_PROTEIN_LOCALIZATION	455	0.286878	1.24858	0.0833333	0.268156	1	4648	tags=29%, list=30%, signal=41%
GOBP_REGULATION_OF_PROTEIN_STABILITY	GOBP_REGULATION_OF_PROTEIN_STABILITY	259	0.236164	1.24818	0.116424	0.268528	1	5144	tags=32%, list=33%, signal=47%
GOBP_HYDROGEN_PEROXIDE_CATABOLIC_PROCESS	GOBP_HYDROGEN_PEROXIDE_CATABOLIC_PROCESS	24	0.498094	1.24795	0.17759	0.268681	1	3260	tags=29%, list=21%, signal=37%
GOBP_REGULATION_OF_ESTABLISHMENT_OF_PLANAR_POLARITY	GOBP_REGULATION_OF_ESTABLISHMENT_OF_PLANAR_POLARITY	55	0.433417	1.24792	0.17234	0.26859	1	4445	tags=45%, list=29%, signal=64%
GOBP_PROTEIN_DEPOLYMERIZATION	GOBP_PROTEIN_DEPOLYMERIZATION	106	0.366177	1.24755	0.151456	0.268892	1	4574	tags=48%, list=30%, signal=68%
GOBP_ARGININE_METABOLIC_PROCESS	GOBP_ARGININE_METABOLIC_PROCESS	19	0.514665	1.24682	0.173653	0.269634	1	1549	tags=21%, list=10%, signal=23%
GOBP_SMAD_PROTEIN_SIGNAL_TRANSDUCTION	GOBP_SMAD_PROTEIN_SIGNAL_TRANSDUCTION	80	0.410956	1.24674	0.115464	0.269593	1	3417	tags=39%, list=22%, signal=50%
GOBP_REGULATION_OF_PROTEIN_LOCALIZATION_TO_SYNAPSE	GOBP_REGULATION_OF_PROTEIN_LOCALIZATION_TO_SYNAPSE	18	0.44621	1.24663	0.193227	0.269566	1	4781	tags=39%, list=31%, signal=56%
GOBP_KIDNEY_EPITHELIUM_DEVELOPMENT	GOBP_KIDNEY_EPITHELIUM_DEVELOPMENT	137	0.403683	1.2462	0.13556	0.269972	1	3486	tags=34%, list=23%, signal=44%
GOBP_REGULATION_OF_SYNAPTIC_PLASTICITY	GOBP_REGULATION_OF_SYNAPTIC_PLASTICITY	171	0.409851	1.24618	0.12233	0.269862	1	3147	tags=29%, list=20%, signal=36%
GOBP_WATER_TRANSPORT	GOBP_WATER_TRANSPORT	23	0.54075	1.24456	0.175403	0.271764	1	4634	tags=57%, list=30%, signal=81%
GOBP_REGULATION_OF_MORPHOGENESIS_OF_AN_EPITHELIUM	GOBP_REGULATION_OF_MORPHOGENESIS_OF_AN_EPITHELIUM	61	0.455711	1.24455	0.144898	0.271643	1	3136	tags=34%, list=20%, signal=43%
GOBP_RESPONSE_TO_XENOBIOTIC_STIMULUS	GOBP_RESPONSE_TO_XENOBIOTIC_STIMULUS	359	0.359659	1.24392	0.0828283	0.272219	1	2716	tags=25%, list=18%, signal=30%
GOBP_RESPONSE_TO_CALCIUM_ION	GOBP_RESPONSE_TO_CALCIUM_ION	136	0.382177	1.24385	0.108738	0.272157	1	3076	tags=31%, list=20%, signal=38%
GOBP_NEGATIVE_REGULATION_OF_SMOOTHENED_SIGNALING_PATHWAY	GOBP_NEGATIVE_REGULATION_OF_SMOOTHENED_SIGNALING_PATHWAY	31	0.426777	1.24374	0.199593	0.272146	1	2654	tags=23%, list=17%, signal=27%
GOBP_POSITIVE_REGULATION_OF_OXIDATIVE_STRESS_INDUCED_CELL_DEATH	GOBP_POSITIVE_REGULATION_OF_OXIDATIVE_STRESS_INDUCED_CELL_DEATH	17	0.492664	1.24346	0.210526	0.272378	1	3526	tags=29%, list=23%, signal=38%
GOBP_REGULATION_OF_ATP_DEPENDENT_ACTIVITY	GOBP_REGULATION_OF_ATP_DEPENDENT_ACTIVITY	64	0.351724	1.24343	0.144351	0.272289	1	3341	tags=25%, list=22%, signal=32%
GOBP_ARACHIDONIC_ACID_SECRETION	GOBP_ARACHIDONIC_ACID_SECRETION	29	0.492906	1.2433	0.161034	0.272301	1	2548	tags=34%, list=17%, signal=41%
GOBP_NEURON_APOPTOTIC_PROCESS	GOBP_NEURON_APOPTOTIC_PROCESS	218	0.338687	1.24304	0.0715706	0.272457	1	2278	tags=21%, list=15%, signal=24%
GOBP_MEMBRANE_LIPID_METABOLIC_PROCESS	GOBP_MEMBRANE_LIPID_METABOLIC_PROCESS	182	0.30558	1.24204	0.114	0.273622	1	3557	tags=22%, list=23%, signal=28%
GOBP_REGULATION_OF_ODONTOGENESIS	GOBP_REGULATION_OF_ODONTOGENESIS	17	0.555904	1.2415	0.166341	0.274152	1	2516	tags=47%, list=16%, signal=56%
GOBP_REGULATION_OF_COLLAGEN_METABOLIC_PROCESS	GOBP_REGULATION_OF_COLLAGEN_METABOLIC_PROCESS	31	0.467356	1.24119	0.18107	0.274441	1	4851	tags=55%, list=32%, signal=80%
GOBP_TOOTH_MINERALIZATION	GOBP_TOOTH_MINERALIZATION	23	0.468576	1.24076	0.14959	0.274836	1	858	tags=17%, list=6%, signal=18%
GOBP_REGULATION_OF_NERVOUS_SYSTEM_PROCESS	GOBP_REGULATION_OF_NERVOUS_SYSTEM_PROCESS	125	0.419734	1.24054	0.130682	0.274976	1	3397	tags=32%, list=22%, signal=41%
GOBP_NEGATIVE_REGULATION_OF_EXTRINSIC_APOPTOTIC_SIGNALING_PATHWAY	GOBP_NEGATIVE_REGULATION_OF_EXTRINSIC_APOPTOTIC_SIGNALING_PATHWAY	89	0.377209	1.24029	0.144603	0.275138	1	1875	tags=17%, list=12%, signal=19%
GOBP_GLYCEROLIPID_BIOSYNTHETIC_PROCESS	GOBP_GLYCEROLIPID_BIOSYNTHETIC_PROCESS	225	0.292736	1.23959	0.139165	0.275875	1	4583	tags=33%, list=30%, signal=46%
GOBP_NUCLEOSIDE_METABOLIC_PROCESS	GOBP_NUCLEOSIDE_METABOLIC_PROCESS	54	0.380534	1.23898	0.159681	0.276536	1	4205	tags=35%, list=27%, signal=48%
GOBP_GASTRULATION	GOBP_GASTRULATION	168	0.360465	1.2388	0.171779	0.276619	1	3903	tags=29%, list=25%, signal=39%
GOBP_LENS_DEVELOPMENT_IN_CAMERA_TYPE_EYE	GOBP_LENS_DEVELOPMENT_IN_CAMERA_TYPE_EYE	80	0.366595	1.23759	0.128906	0.277997	1	3977	tags=35%, list=26%, signal=47%
GOBP_CELLULAR_ANION_HOMEOSTASIS	GOBP_CELLULAR_ANION_HOMEOSTASIS	16	0.461286	1.23743	0.171488	0.278055	1	2105	tags=19%, list=14%, signal=22%
GOBP_APOPTOTIC_PROCESS_INVOLVED_IN_DEVELOPMENT	GOBP_APOPTOTIC_PROCESS_INVOLVED_IN_DEVELOPMENT	36	0.442653	1.23707	0.150713	0.278334	1	2662	tags=31%, list=17%, signal=37%
GOBP_PROTEIN_TARGETING_TO_VACUOLE	GOBP_PROTEIN_TARGETING_TO_VACUOLE	36	0.29383	1.23694	0.199195	0.278366	1	5939	tags=53%, list=39%, signal=86%
GOBP_CHEMICAL_HOMEOSTASIS_WITHIN_A_TISSUE	GOBP_CHEMICAL_HOMEOSTASIS_WITHIN_A_TISSUE	15	0.55994	1.23688	0.210425	0.278307	1	2991	tags=40%, list=19%, signal=50%
GOBP_NEGATIVE_REGULATION_OF_MUSCLE_CELL_APOPTOTIC_PROCESS	GOBP_NEGATIVE_REGULATION_OF_MUSCLE_CELL_APOPTOTIC_PROCESS	34	0.426081	1.23668	0.152577	0.278424	1	2567	tags=29%, list=17%, signal=35%
GOBP_REGULATION_OF_CARDIAC_MUSCLE_CELL_DIFFERENTIATION	GOBP_REGULATION_OF_CARDIAC_MUSCLE_CELL_DIFFERENTIATION	15	0.536118	1.23666	0.214286	0.278301	1	3385	tags=47%, list=22%, signal=60%
GOBP_POSITIVE_REGULATION_OF_VIRAL_GENOME_REPLICATION	GOBP_POSITIVE_REGULATION_OF_VIRAL_GENOME_REPLICATION	29	0.34865	1.23638	0.219561	0.278543	1	2278	tags=14%, list=15%, signal=16%
GOBP_HISTONE_H3_ACETYLATION	GOBP_HISTONE_H3_ACETYLATION	65	0.28269	1.2358	0.175	0.279135	1	856	tags=8%, list=6%, signal=8%
GOBP_THIOESTER_METABOLIC_PROCESS	GOBP_THIOESTER_METABOLIC_PROCESS	80	0.340274	1.23538	0.159596	0.279491	1	4245	tags=28%, list=28%, signal=38%
GOBP_REGULATION_OF_SUBSTRATE_ADHESION_DEPENDENT_CELL_SPREADING	GOBP_REGULATION_OF_SUBSTRATE_ADHESION_DEPENDENT_CELL_SPREADING	54	0.380832	1.23525	0.210037	0.279529	1	4236	tags=39%, list=28%, signal=54%
GOBP_DNA_DEALKYLATION	GOBP_DNA_DEALKYLATION	28	0.422198	1.23513	0.199584	0.279526	1	2520	tags=25%, list=16%, signal=30%
GOBP_VACUOLAR_TRANSPORT	GOBP_VACUOLAR_TRANSPORT	143	0.245311	1.23483	0.210744	0.279762	1	5839	tags=36%, list=38%, signal=57%
GOBP_VITAMIN_BIOSYNTHETIC_PROCESS	GOBP_VITAMIN_BIOSYNTHETIC_PROCESS	19	0.516705	1.23446	0.20122	0.28009	1	3756	tags=47%, list=24%, signal=63%
GOBP_CELLULAR_RESPONSE_TO_COPPER_ION	GOBP_CELLULAR_RESPONSE_TO_COPPER_ION	22	0.484726	1.23433	0.249497	0.280132	1	3881	tags=41%, list=25%, signal=55%
GOBP_REGULATION_OF_NEURON_PROJECTION_REGENERATION	GOBP_REGULATION_OF_NEURON_PROJECTION_REGENERATION	28	0.436751	1.23425	0.178499	0.280084	1	3631	tags=43%, list=24%, signal=56%
GOBP_GAS_TRANSPORT	GOBP_GAS_TRANSPORT	17	0.555773	1.23415	0.173489	0.280083	1	3260	tags=47%, list=21%, signal=60%
GOBP_REGULATION_OF_PROTEIN_LOCALIZATION_TO_NUCLEUS	GOBP_REGULATION_OF_PROTEIN_LOCALIZATION_TO_NUCLEUS	127	0.285009	1.23401	0.170974	0.280136	1	2707	tags=18%, list=18%, signal=22%
GOBP_NEGATIVE_REGULATION_OF_GTPASE_ACTIVITY	GOBP_NEGATIVE_REGULATION_OF_GTPASE_ACTIVITY	30	0.362713	1.23388	0.196787	0.280177	1	3652	tags=30%, list=24%, signal=39%
GOBP_REGULATION_OF_EXOCYTOSIS	GOBP_REGULATION_OF_EXOCYTOSIS	187	0.369067	1.23375	0.122371	0.280213	1	4018	tags=36%, list=26%, signal=48%
GOBP_NEGATIVE_REGULATION_OF_ANOIKIS	GOBP_NEGATIVE_REGULATION_OF_ANOIKIS	17	0.478243	1.23327	0.188	0.280713	1	4816	tags=47%, list=31%, signal=68%
GOBP_REGULATION_OF_AMINO_ACID_TRANSPORT	GOBP_REGULATION_OF_AMINO_ACID_TRANSPORT	38	0.470064	1.2331	0.175542	0.280792	1	4377	tags=47%, list=29%, signal=66%
GOBP_NEGATIVE_REGULATION_OF_OXIDATIVE_STRESS_INDUCED_CELL_DEATH	GOBP_NEGATIVE_REGULATION_OF_OXIDATIVE_STRESS_INDUCED_CELL_DEATH	42	0.385893	1.23265	0.153398	0.281218	1	2173	tags=19%, list=14%, signal=22%
[truncated: 1,377 more rows]

## Sheet: gsea_report_for_AutCluser B
NAME	GS<br> follow link to MSigDB	SIZE	ES	NES	NOM p-val	FDR q-val	FWER p-val	RANK AT MAX	LEADING EDGE	Column1
HALLMARK_MYC_TARGETS_V1	HALLMARK_MYC_TARGETS_V1	187	-0.566719	-2.06925	0.00202429	0.00766132	0.018	4701	tags=59%, list=31%, signal=84%
HALLMARK_MYC_TARGETS_V2	HALLMARK_MYC_TARGETS_V2	58	-0.632515	-1.81511	0.00414079	0.0311001	0.106	3359	tags=71%, list=22%, signal=90%
HALLMARK_UNFOLDED_PROTEIN_RESPONSE	HALLMARK_UNFOLDED_PROTEIN_RESPONSE	105	-0.407298	-1.68453	0.0589354	0.0647845	0.256	4045	tags=45%, list=26%, signal=60%
HALLMARK_G2M_CHECKPOINT	HALLMARK_G2M_CHECKPOINT	187	-0.707881	-1.66941	0.0123457	0.0536179	0.274	1782	tags=45%, list=12%, signal=50%
HALLMARK_E2F_TARGETS	HALLMARK_E2F_TARGETS	192	-0.706058	-1.65545	0.0185185	0.047644	0.294	1756	tags=45%, list=11%, signal=50%
HALLMARK_DNA_REPAIR	HALLMARK_DNA_REPAIR	133	-0.334549	-1.57705	0.0833333	0.0663741	0.404	4164	tags=47%, list=27%, signal=63%
HALLMARK_OXIDATIVE_PHOSPHORYLATION	HALLMARK_OXIDATIVE_PHOSPHORYLATION	181	-0.308292	-1.44117	0.174636	0.126077	0.632	5113	tags=50%, list=33%, signal=74%
HALLMARK_MTORC1_SIGNALING	HALLMARK_MTORC1_SIGNALING	192	-0.373708	-1.40879	0.153386	0.131106	0.686	2570	tags=34%, list=17%, signal=40%
HALLMARK_GLYCOLYSIS	HALLMARK_GLYCOLYSIS	196	-0.366531	-1.31178	0.123016	0.179632	0.814	3645	tags=39%, list=24%, signal=51%
HALLMARK_MITOTIC_SPINDLE	HALLMARK_MITOTIC_SPINDLE	194	-0.372823	-1.29643	0.228571	0.173293	0.832	1465	tags=18%, list=10%, signal=20%
HALLMARK_SPERMATOGENESIS	HALLMARK_SPERMATOGENESIS	132	-0.36767	-1.06326	0.342795	0.375538	0.956	2728	tags=37%, list=18%, signal=45%
HALLMARK_PANCREAS_BETA_CELLS	HALLMARK_PANCREAS_BETA_CELLS	40	-0.330699	-0.783949	0.788703	0.721353	0.994	3397	tags=45%, list=22%, signal=58%
GOBP_RIBONUCLEOPROTEIN_COMPLEX_BIOGENESIS	GOBP_RIBONUCLEOPROTEIN_COMPLEX_BIOGENESIS	360	-0.486843	-2.2715	0	0.00556569	0.01	4972	tags=60%, list=32%, signal=86%
GOBP_MITOCHONDRIAL_GENE_EXPRESSION	GOBP_MITOCHONDRIAL_GENE_EXPRESSION	84	-0.635579	-2.25837	0	0.00352717	0.013	4268	tags=75%, list=28%, signal=103%
GOBP_MITOCHONDRIAL_TRANSLATION	GOBP_MITOCHONDRIAL_TRANSLATION	60	-0.664576	-2.25366	0	0.00258217	0.014	4380	tags=78%, list=29%, signal=109%
GOBP_NCRNA_PROCESSING	GOBP_NCRNA_PROCESSING	313	-0.492664	-2.23714	0.00203666	0.0023347	0.015	4573	tags=56%, list=30%, signal=78%
GOBP_RRNA_METABOLIC_PROCESS	GOBP_RRNA_METABOLIC_PROCESS	223	-0.504284	-2.22806	0	0.0022919	0.017	4448	tags=56%, list=29%, signal=77%
GOBP_RIBOSOME_BIOGENESIS	GOBP_RIBOSOME_BIOGENESIS	258	-0.523137	-2.22443	0	0.00209835	0.019	4448	tags=56%, list=29%, signal=78%
GOBP_TRNA_METABOLIC_PROCESS	GOBP_TRNA_METABOLIC_PROCESS	138	-0.522206	-2.17198	0	0.00330457	0.034	4260	tags=54%, list=28%, signal=75%
GOBP_NCRNA_METABOLIC_PROCESS	GOBP_NCRNA_METABOLIC_PROCESS	420	-0.45161	-2.16768	0	0.00301126	0.036	4591	tags=55%, list=30%, signal=76%
GOBP_PROTEIN_TRANSMEMBRANE_IMPORT_INTO_INTRACELLULAR_ORGANELLE	GOBP_PROTEIN_TRANSMEMBRANE_IMPORT_INTO_INTRACELLULAR_ORGANELLE	30	-0.616966	-2.12071	0.00392927	0.00533232	0.063	3415	tags=53%, list=22%, signal=68%
GOBP_MITOCHONDRIAL_RNA_METABOLIC_PROCESS	GOBP_MITOCHONDRIAL_RNA_METABOLIC_PROCESS	39	-0.623053	-2.09674	0.00199601	0.00692024	0.086	2906	tags=59%, list=19%, signal=73%
GOBP_RRNA_TRANSCRIPTION	GOBP_RRNA_TRANSCRIPTION	26	-0.566662	-2.09645	0.00192678	0.00629112	0.086	5098	tags=81%, list=33%, signal=121%
GOBP_RRNA_MODIFICATION	GOBP_RRNA_MODIFICATION	28	-0.610624	-2.07384	0.0040568	0.00816272	0.115	4939	tags=68%, list=32%, signal=100%
GOBP_MATURATION_OF_5_8S_RRNA	GOBP_MATURATION_OF_5_8S_RRNA	33	-0.631248	-2.05622	0.00201613	0.00984822	0.143	4448	tags=64%, list=29%, signal=89%
GOBP_RIBOSOMAL_LARGE_SUBUNIT_BIOGENESIS	GOBP_RIBOSOMAL_LARGE_SUBUNIT_BIOGENESIS	60	-0.584765	-2.05561	0.00204082	0.00936409	0.146	4959	tags=63%, list=32%, signal=93%
GOBP_RIBOSOMAL_SMALL_SUBUNIT_BIOGENESIS	GOBP_RIBOSOMAL_SMALL_SUBUNIT_BIOGENESIS	62	-0.545125	-2.04298	0.00608519	0.00994773	0.162	4397	tags=58%, list=29%, signal=81%
GOBP_TRNA_PROCESSING	GOBP_TRNA_PROCESSING	98	-0.501122	-2.03976	0	0.00965739	0.164	4692	tags=59%, list=31%, signal=85%
GOBP_REGULATION_OF_MITOCHONDRIAL_GENE_EXPRESSION	GOBP_REGULATION_OF_MITOCHONDRIAL_GENE_EXPRESSION	21	-0.650068	-2.03179	0	0.0100896	0.179	4268	tags=71%, list=28%, signal=99%
GOBP_AMINO_ACID_ACTIVATION	GOBP_AMINO_ACID_ACTIVATION	24	-0.647408	-1.9973	0.003861	0.0144946	0.259	2339	tags=46%, list=15%, signal=54%
GOBP_RIBONUCLEOPROTEIN_COMPLEX_SUBUNIT_ORGANIZATION	GOBP_RIBONUCLEOPROTEIN_COMPLEX_SUBUNIT_ORGANIZATION	157	-0.403949	-1.98671	0.0125523	0.0156609	0.291	3851	tags=38%, list=25%, signal=50%
GOBP_MATURATION_OF_SSU_RRNA_FROM_TRICISTRONIC_RRNA_TRANSCRIPT_SSU_RRNA_5_8S_RRNA_LSU_RRNA	GOBP_MATURATION_OF_SSU_RRNA_FROM_TRICISTRONIC_RRNA_TRANSCRIPT_SSU_RRNA_5_8S_RRNA_LSU_RRNA	31	-0.619125	-1.9727	0.00590551	0.0171414	0.32	4397	tags=68%, list=29%, signal=95%
GOBP_MATURATION_OF_SSU_RRNA	GOBP_MATURATION_OF_SSU_RRNA	41	-0.572363	-1.95943	0.00205761	0.0191612	0.351	4397	tags=66%, list=29%, signal=92%
GOBP_POSITIVE_REGULATION_OF_TELOMERASE_RNA_LOCALIZATION_TO_CAJAL_BODY	GOBP_POSITIVE_REGULATION_OF_TELOMERASE_RNA_LOCALIZATION_TO_CAJAL_BODY	15	-0.716248	-1.94887	0	0.0203943	0.371	3194	tags=73%, list=21%, signal=93%
GOBP_DNA_STRAND_ELONGATION	GOBP_DNA_STRAND_ELONGATION	35	-0.68078	-1.94817	0.0040404	0.0197423	0.374	1937	tags=46%, list=13%, signal=52%
GOBP_MITOCHONDRIAL_RNA_PROCESSING	GOBP_MITOCHONDRIAL_RNA_PROCESSING	18	-0.674809	-1.93381	0	0.0219802	0.413	4057	tags=78%, list=26%, signal=106%
GOBP_MATURATION_OF_5_8S_RRNA_FROM_TRICISTRONIC_RRNA_TRANSCRIPT_SSU_RRNA_5_8S_RRNA_LSU_RRNA	GOBP_MATURATION_OF_5_8S_RRNA_FROM_TRICISTRONIC_RRNA_TRANSCRIPT_SSU_RRNA_5_8S_RRNA_LSU_RRNA	23	-0.646826	-1.93257	0.0100604	0.0212364	0.414	3660	tags=57%, list=24%, signal=74%
GOBP_TELOMERASE_RNA_LOCALIZATION	GOBP_TELOMERASE_RNA_LOCALIZATION	19	-0.614613	-1.91848	0.00198413	0.0236878	0.458	3194	tags=63%, list=21%, signal=80%
GOBP_INTRACELLULAR_PROTEIN_TRANSMEMBRANE_TRANSPORT	GOBP_INTRACELLULAR_PROTEIN_TRANSMEMBRANE_TRANSPORT	45	-0.47293	-1.90412	0.00596422	0.0267924	0.503	3415	tags=42%, list=22%, signal=54%
GOBP_NEGATIVE_REGULATION_OF_DNA_REPLICATION	GOBP_NEGATIVE_REGULATION_OF_DNA_REPLICATION	29	-0.693387	-1.90186	0	0.0266176	0.512	2002	tags=48%, list=13%, signal=55%
GOBP_RNA_3_END_PROCESSING	GOBP_RNA_3_END_PROCESSING	94	-0.427196	-1.89905	0.0123967	0.0263226	0.522	4541	tags=52%, list=30%, signal=74%
GOBP_PSEUDOURIDINE_SYNTHESIS	GOBP_PSEUDOURIDINE_SYNTHESIS	17	-0.665253	-1.89874	0.00195695	0.025478	0.522	3942	tags=82%, list=26%, signal=111%
GOBP_CLEAVAGE_INVOLVED_IN_RRNA_PROCESSING	GOBP_CLEAVAGE_INVOLVED_IN_RRNA_PROCESSING	26	-0.610865	-1.89632	0.0121951	0.0253258	0.529	4939	tags=69%, list=32%, signal=102%
GOBP_RIBOSOME_ASSEMBLY	GOBP_RIBOSOME_ASSEMBLY	51	-0.505457	-1.88297	0.0188285	0.0286718	0.572	5100	tags=57%, list=33%, signal=85%
GOBP_NUCLEOBASE_BIOSYNTHETIC_PROCESS	GOBP_NUCLEOBASE_BIOSYNTHETIC_PROCESS	18	-0.760916	-1.88	0	0.0287693	0.581	2672	tags=67%, list=17%, signal=81%
GOBP_CYTOKINETIC_PROCESS	GOBP_CYTOKINETIC_PROCESS	38	-0.605977	-1.8779	0.00625	0.0285938	0.588	1489	tags=29%, list=10%, signal=32%
GOBP_MATURATION_OF_LSU_RRNA	GOBP_MATURATION_OF_LSU_RRNA	23	-0.634159	-1.87029	0.00835073	0.0300471	0.608	3842	tags=57%, list=25%, signal=75%
GOBP_BASE_EXCISION_REPAIR	GOBP_BASE_EXCISION_REPAIR	41	-0.587952	-1.85886	0.00413223	0.0327937	0.65	2934	tags=46%, list=19%, signal=57%
GOBP_RRNA_CATABOLIC_PROCESS	GOBP_RRNA_CATABOLIC_PROCESS	19	-0.605032	-1.85867	0.00833333	0.0319976	0.65	2362	tags=37%, list=15%, signal=43%
GOBP_HISTONE_EXCHANGE	GOBP_HISTONE_EXCHANGE	20	-0.716378	-1.85658	0	0.0318092	0.655	840	tags=30%, list=5%, signal=32%
GOBP_NCRNA_TRANSCRIPTION	GOBP_NCRNA_TRANSCRIPTION	46	-0.45075	-1.85585	0.00205339	0.0311629	0.657	5098	tags=65%, list=33%, signal=97%
GOBP_SPLICEOSOMAL_SNRNP_ASSEMBLY	GOBP_SPLICEOSOMAL_SNRNP_ASSEMBLY	32	-0.561335	-1.85366	0.014	0.0309156	0.66	4835	tags=66%, list=31%, signal=96%
GOBP_NCRNA_3_END_PROCESSING	GOBP_NCRNA_3_END_PROCESSING	34	-0.522543	-1.84799	0.0186722	0.0322422	0.678	4712	tags=59%, list=31%, signal=85%
GOBP_ESTABLISHMENT_OF_PROTEIN_LOCALIZATION_TO_CHROMOSOME	GOBP_ESTABLISHMENT_OF_PROTEIN_LOCALIZATION_TO_CHROMOSOME	20	-0.644356	-1.83262	0.00809717	0.0364531	0.725	4015	tags=75%, list=26%, signal=101%
GOBP_MITOTIC_SPINDLE_ASSEMBLY	GOBP_MITOTIC_SPINDLE_ASSEMBLY	61	-0.643106	-1.82778	0.0198807	0.0376607	0.741	1598	tags=30%, list=10%, signal=33%
GOBP_REGULATION_OF_DNA_STRAND_ELONGATION	GOBP_REGULATION_OF_DNA_STRAND_ELONGATION	16	-0.551016	-1.81245	0.0175439	0.0431117	0.782	1937	tags=31%, list=13%, signal=36%
GOBP_TRNA_MODIFICATION	GOBP_TRNA_MODIFICATION	70	-0.467492	-1.81036	0.0214425	0.0431376	0.796	4214	tags=51%, list=27%, signal=71%
GOBP_RRNA_METHYLATION	GOBP_RRNA_METHYLATION	18	-0.569271	-1.80637	0.0208333	0.0437441	0.804	4889	tags=56%, list=32%, signal=81%
GOBP_SISTER_CHROMATID_SEGREGATION	GOBP_SISTER_CHROMATID_SEGREGATION	179	-0.643633	-1.79214	0.0180723	0.0494071	0.843	1823	tags=38%, list=12%, signal=43%
GOBP_ESTABLISHMENT_OF_PROTEIN_LOCALIZATION_TO_TELOMERE	GOBP_ESTABLISHMENT_OF_PROTEIN_LOCALIZATION_TO_TELOMERE	16	-0.671132	-1.79132	0.00403226	0.0487931	0.845	3194	tags=69%, list=21%, signal=87%
GOBP_METAPHASE_PLATE_CONGRESSION	GOBP_METAPHASE_PLATE_CONGRESSION	61	-0.687377	-1.78897	0.016129	0.0488709	0.846	1424	tags=34%, list=9%, signal=38%
GOBP_MITOTIC_METAPHASE_PLATE_CONGRESSION	GOBP_MITOTIC_METAPHASE_PLATE_CONGRESSION	49	-0.709955	-1.78567	0.0181818	0.0495626	0.855	1823	tags=41%, list=12%, signal=46%
GOBP_MITOTIC_SISTER_CHROMATID_SEGREGATION	GOBP_MITOTIC_SISTER_CHROMATID_SEGREGATION	155	-0.659664	-1.78005	0.0199203	0.0513447	0.865	1823	tags=40%, list=12%, signal=45%
GOBP_UBIQUINONE_METABOLIC_PROCESS	GOBP_UBIQUINONE_METABOLIC_PROCESS	16	-0.589184	-1.77916	0.0182186	0.0507578	0.867	2795	tags=44%, list=18%, signal=53%
GOBP_CHROMOSOME_LOCALIZATION	GOBP_CHROMOSOME_LOCALIZATION	75	-0.633943	-1.7723	0.0201613	0.0533013	0.886	1424	tags=29%, list=9%, signal=32%
GOBP_RNA_5_END_PROCESSING	GOBP_RNA_5_END_PROCESSING	18	-0.643752	-1.77061	0.00808081	0.0533092	0.886	4562	tags=78%, list=30%, signal=111%
GOBP_MULTIVESICULAR_BODY_ORGANIZATION	GOBP_MULTIVESICULAR_BODY_ORGANIZATION	29	-0.468827	-1.76221	0.0155039	0.0571773	0.899	4120	tags=45%, list=27%, signal=61%
GOBP_INNER_MITOCHONDRIAL_MEMBRANE_ORGANIZATION	GOBP_INNER_MITOCHONDRIAL_MEMBRANE_ORGANIZATION	30	-0.484415	-1.75866	0.0241449	0.0582158	0.908	3980	tags=57%, list=26%, signal=76%
GOBP_NUCLEAR_CHROMOSOME_SEGREGATION	GOBP_NUCLEAR_CHROMOSOME_SEGREGATION	237	-0.615858	-1.75594	0.0222222	0.0589048	0.911	1823	tags=35%, list=12%, signal=39%
GOBP_CHROMOSOME_SEGREGATION	GOBP_CHROMOSOME_SEGREGATION	293	-0.599822	-1.75534	0.0223124	0.0583064	0.912	1823	tags=34%, list=12%, signal=38%
GOBP_UBIQUITIN_DEPENDENT_PROTEIN_CATABOLIC_PROCESS_VIA_THE_MULTIVESICULAR_BODY_SORTING_PATHWAY	GOBP_UBIQUITIN_DEPENDENT_PROTEIN_CATABOLIC_PROCESS_VIA_THE_MULTIVESICULAR_BODY_SORTING_PATHWAY	30	-0.456532	-1.75374	0.0211132	0.0581736	0.915	4120	tags=43%, list=27%, signal=59%
GOBP_POSITIVE_REGULATION_OF_MRNA_SPLICING_VIA_SPLICEOSOME	GOBP_POSITIVE_REGULATION_OF_MRNA_SPLICING_VIA_SPLICEOSOME	22	-0.615785	-1.75069	0.00835073	0.059045	0.921	3101	tags=41%, list=20%, signal=51%
GOBP_MITOTIC_SPINDLE_ORGANIZATION	GOBP_MITOTIC_SPINDLE_ORGANIZATION	110	-0.60062	-1.74979	0.0316206	0.0586169	0.922	1598	tags=32%, list=10%, signal=35%
GOBP_RIBOSOMAL_LARGE_SUBUNIT_ASSEMBLY	GOBP_RIBOSOMAL_LARGE_SUBUNIT_ASSEMBLY	23	-0.564617	-1.73621	0.0247934	0.0662073	0.938	1836	tags=30%, list=12%, signal=35%
GOBP_DNA_REPAIR	GOBP_DNA_REPAIR	438	-0.432112	-1.73167	0.0379242	0.0678772	0.944	3193	tags=36%, list=21%, signal=45%
GOBP_SPINDLE_ASSEMBLY	GOBP_SPINDLE_ASSEMBLY	107	-0.532368	-1.72835	0.0396825	0.0691019	0.948	1675	tags=24%, list=11%, signal=27%
GOBP_PROTEIN_K11_LINKED_UBIQUITINATION	GOBP_PROTEIN_K11_LINKED_UBIQUITINATION	27	-0.521821	-1.72831	0.0159681	0.0680638	0.948	1799	tags=22%, list=12%, signal=25%
GOBP_DNA_GEOMETRIC_CHANGE	GOBP_DNA_GEOMETRIC_CHANGE	86	-0.612605	-1.71713	0.030303	0.0743758	0.959	1712	tags=37%, list=11%, signal=42%
GOBP_NUCLEOTIDE_SUGAR_METABOLIC_PROCESS	GOBP_NUCLEOTIDE_SUGAR_METABOLIC_PROCESS	30	-0.485431	-1.71604	0.0224949	0.0739742	0.959	2731	tags=43%, list=18%, signal=53%
GOBP_MICROTUBULE_CYTOSKELETON_ORGANIZATION_INVOLVED_IN_MITOSIS	GOBP_MICROTUBULE_CYTOSKELETON_ORGANIZATION_INVOLVED_IN_MITOSIS	135	-0.550432	-1.7133	0.0411765	0.0746752	0.961	1945	tags=32%, list=13%, signal=36%
GOBP_DNA_DEPENDENT_DNA_REPLICATION	GOBP_DNA_DEPENDENT_DNA_REPLICATION	138	-0.628839	-1.71296	0.024948	0.0738234	0.961	2650	tags=51%, list=17%, signal=61%
GOBP_REGULATION_OF_CENTROSOME_CYCLE	GOBP_REGULATION_OF_CENTROSOME_CYCLE	46	-0.548706	-1.71174	0.0262097	0.0737119	0.962	1754	tags=37%, list=11%, signal=42%
GOBP_REGULATION_OF_DNA_REPLICATION	GOBP_REGULATION_OF_DNA_REPLICATION	119	-0.519814	-1.71037	0.0366599	0.0735558	0.965	2002	tags=34%, list=13%, signal=39%
GOBP_OLIGOSACCHARIDE_LIPID_INTERMEDIATE_BIOSYNTHETIC_PROCESS	GOBP_OLIGOSACCHARIDE_LIPID_INTERMEDIATE_BIOSYNTHETIC_PROCESS	16	-0.546748	-1.70567	0.0348162	0.0757164	0.968	5165	tags=63%, list=34%, signal=94%
GOBP_REGULATION_OF_CHROMOSOME_SEGREGATION	GOBP_REGULATION_OF_CHROMOSOME_SEGREGATION	83	-0.65408	-1.70337	0.027833	0.076416	0.97	1823	tags=43%, list=12%, signal=49%
GOBP_SISTER_CHROMATID_COHESION	GOBP_SISTER_CHROMATID_COHESION	46	-0.625139	-1.70128	0.0357143	0.0768853	0.973	855	tags=24%, list=6%, signal=25%
GOBP_NUCLEUS_ORGANIZATION	GOBP_NUCLEUS_ORGANIZATION	124	-0.37154	-1.69705	0.00631579	0.0787502	0.975	1440	tags=17%, list=9%, signal=19%
GOBP_REGULATION_OF_CHROMOSOME_ORGANIZATION	GOBP_REGULATION_OF_CHROMOSOME_ORGANIZATION	189	-0.474591	-1.6947	0.040404	0.0795683	0.977	2327	tags=31%, list=15%, signal=36%
GOBP_DNA_REPLICATION	GOBP_DNA_REPLICATION	250	-0.512014	-1.6922	0.0392562	0.0802949	0.978	3196	tags=45%, list=21%, signal=56%
GOBP_TETRAPYRROLE_BIOSYNTHETIC_PROCESS	GOBP_TETRAPYRROLE_BIOSYNTHETIC_PROCESS	32	-0.455683	-1.68441	0.0481928	0.0853194	0.978	3250	tags=41%, list=21%, signal=51%
GOBP_SNRNA_PROCESSING	GOBP_SNRNA_PROCESSING	22	-0.532214	-1.67944	0.0244898	0.0880727	0.978	4712	tags=59%, list=31%, signal=85%
GOBP_ATTACHMENT_OF_SPINDLE_MICROTUBULES_TO_KINETOCHORE	GOBP_ATTACHMENT_OF_SPINDLE_MICROTUBULES_TO_KINETOCHORE	30	-0.765864	-1.67727	0.026	0.0886375	0.98	1325	tags=47%, list=9%, signal=51%
GOBP_NEGATIVE_REGULATION_OF_CHROMOSOME_ORGANIZATION	GOBP_NEGATIVE_REGULATION_OF_CHROMOSOME_ORGANIZATION	77	-0.589215	-1.67517	0.0552268	0.0893526	0.982	1823	tags=35%, list=12%, signal=40%
GOBP_MITOCHONDRIAL_TRANSMEMBRANE_TRANSPORT	GOBP_MITOCHONDRIAL_TRANSMEMBRANE_TRANSPORT	69	-0.405278	-1.67487	0.015534	0.0885036	0.982	3130	tags=38%, list=20%, signal=47%
GOBP_BINDING_OF_SPERM_TO_ZONA_PELLUCIDA	GOBP_BINDING_OF_SPERM_TO_ZONA_PELLUCIDA	36	-0.58994	-1.67393	0.0020202	0.0881313	0.983	3636	tags=53%, list=24%, signal=69%
GOBP_DNA_REPLICATION_INDEPENDENT_CHROMATIN_ORGANIZATION	GOBP_DNA_REPLICATION_INDEPENDENT_CHROMATIN_ORGANIZATION	17	-0.704663	-1.6717	0.0161616	0.0889817	0.984	922	tags=35%, list=6%, signal=38%
GOBP_CYTOSKELETON_DEPENDENT_CYTOKINESIS	GOBP_CYTOSKELETON_DEPENDENT_CYTOKINESIS	82	-0.474269	-1.66534	0.0337302	0.0931718	0.989	1489	tags=23%, list=10%, signal=26%
GOBP_SPINDLE_ORGANIZATION	GOBP_SPINDLE_ORGANIZATION	164	-0.508058	-1.66504	0.0634921	0.0923482	0.989	1675	tags=26%, list=11%, signal=29%
GOBP_CELL_CYCLE_CHECKPOINT_SIGNALING	GOBP_CELL_CYCLE_CHECKPOINT_SIGNALING	149	-0.536973	-1.66442	0.0327198	0.0918661	0.989	1823	tags=31%, list=12%, signal=35%
GOBP_DOUBLE_STRAND_BREAK_REPAIR	GOBP_DOUBLE_STRAND_BREAK_REPAIR	223	-0.478109	-1.66218	0.0482897	0.0927469	0.989	3192	tags=40%, list=21%, signal=50%
GOBP_REGULATION_OF_DNA_DEPENDENT_DNA_REPLICATION	GOBP_REGULATION_OF_DNA_DEPENDENT_DNA_REPLICATION	47	-0.690014	-1.66204	0.022869	0.0917915	0.989	2723	tags=64%, list=18%, signal=77%
GOBP_REGULATION_OF_CHROMOSOME_SEPARATION	GOBP_REGULATION_OF_CHROMOSOME_SEPARATION	68	-0.650753	-1.65894	0.0417495	0.0933927	0.991	1823	tags=46%, list=12%, signal=51%
GOBP_PROTEIN_LOCALIZATION_TO_CHROMOSOME_TELOMERIC_REGION	GOBP_PROTEIN_LOCALIZATION_TO_CHROMOSOME_TELOMERIC_REGION	28	-0.466531	-1.65603	0.0598802	0.0946865	0.991	3194	tags=46%, list=21%, signal=59%
GOBP_MRNA_3_END_PROCESSING	GOBP_MRNA_3_END_PROCESSING	58	-0.367814	-1.65518	0.0484848	0.0943819	0.991	4082	tags=45%, list=27%, signal=61%
GOBP_POSITIVE_REGULATION_OF_CELL_CYCLE_G2_M_PHASE_TRANSITION	GOBP_POSITIVE_REGULATION_OF_CELL_CYCLE_G2_M_PHASE_TRANSITION	31	-0.660002	-1.65365	0.0125523	0.0946443	0.991	1230	tags=32%, list=8%, signal=35%
GOBP_METAPHASE_ANAPHASE_TRANSITION_OF_CELL_CYCLE	GOBP_METAPHASE_ANAPHASE_TRANSITION_OF_CELL_CYCLE	62	-0.657584	-1.6529	0.0473373	0.0942934	0.991	1823	tags=45%, list=12%, signal=51%
GOBP_CENTROSOME_SEPARATION	GOBP_CENTROSOME_SEPARATION	15	-0.726471	-1.64474	0.0142857	0.100269	0.994	879	tags=33%, list=6%, signal=35%
GOBP_MITOTIC_CELL_CYCLE_CHECKPOINT_SIGNALING	GOBP_MITOTIC_CELL_CYCLE_CHECKPOINT_SIGNALING	113	-0.543603	-1.64404	0.0536779	0.0997762	0.994	1823	tags=32%, list=12%, signal=36%
GOBP_MIDBODY_ABSCISSION	GOBP_MIDBODY_ABSCISSION	16	-0.591595	-1.64306	0.026749	0.0995181	0.994	2835	tags=38%, list=18%, signal=46%
GOBP_SNRNA_METABOLIC_PROCESS	GOBP_SNRNA_METABOLIC_PROCESS	47	-0.405195	-1.6405	0.040404	0.100805	0.994	5045	tags=51%, list=33%, signal=76%
GOBP_CHROMOSOME_SEPARATION	GOBP_CHROMOSOME_SEPARATION	87	-0.628529	-1.63996	0.0386179	0.100276	0.994	1823	tags=40%, list=12%, signal=45%
GOBP_MITOCHONDRIAL_RESPIRATORY_CHAIN_COMPLEX_ASSEMBLY	GOBP_MITOCHONDRIAL_RESPIRATORY_CHAIN_COMPLEX_ASSEMBLY	66	-0.420477	-1.63495	0.0732673	0.103552	0.994	3959	tags=44%, list=26%, signal=59%
GOBP_DNA_DOUBLE_STRAND_BREAK_PROCESSING	GOBP_DNA_DOUBLE_STRAND_BREAK_PROCESSING	16	-0.701044	-1.63254	0.0180361	0.104568	0.994	947	tags=31%, list=6%, signal=33%
GOBP_REGULATION_OF_MITOTIC_SPINDLE_ASSEMBLY	GOBP_REGULATION_OF_MITOTIC_SPINDLE_ASSEMBLY	20	-0.557831	-1.6289	0.050813	0.106778	0.995	2835	tags=35%, list=18%, signal=43%
GOBP_TRANSCRIPTION_BY_RNA_POLYMERASE_I	GOBP_TRANSCRIPTION_BY_RNA_POLYMERASE_I	43	-0.410954	-1.62385	0.0489237	0.110329	0.996	3058	tags=40%, list=20%, signal=49%
GOBP_REGULATION_OF_SPINDLE_ORGANIZATION	GOBP_REGULATION_OF_SPINDLE_ORGANIZATION	41	-0.488351	-1.62231	0.061753	0.110621	0.996	2835	tags=32%, list=18%, signal=39%
GOBP_SNO_S_RNA_METABOLIC_PROCESS	GOBP_SNO_S_RNA_METABOLIC_PROCESS	15	-0.546118	-1.62221	0.0582329	0.109662	0.996	2304	tags=40%, list=15%, signal=47%
GOBP_NCRNA_CATABOLIC_PROCESS	GOBP_NCRNA_CATABOLIC_PROCESS	36	-0.444166	-1.61593	0.0394477	0.114567	0.996	2362	tags=28%, list=15%, signal=33%
GOBP_RNA_EXPORT_FROM_NUCLEUS	GOBP_RNA_EXPORT_FROM_NUCLEUS	70	-0.342463	-1.61096	0.0591966	0.118806	0.997	4258	tags=43%, list=28%, signal=59%
GOBP_MANNOSYLATION	GOBP_MANNOSYLATION	25	-0.50141	-1.60891	0.0227273	0.119677	0.997	4715	tags=60%, list=31%, signal=86%
GOBP_MITOTIC_CYTOKINETIC_PROCESS	GOBP_MITOTIC_CYTOKINETIC_PROCESS	22	-0.519149	-1.60794	0.0524194	0.119488	0.997	1413	tags=23%, list=9%, signal=25%
GOBP_NADPH_REGENERATION	GOBP_NADPH_REGENERATION	16	-0.570043	-1.60589	0.0551181	0.120423	0.998	4460	tags=75%, list=29%, signal=106%
GOBP_REGULATION_OF_MITOCHONDRIAL_MEMBRANE_PERMEABILITY_INVOLVED_IN_APOPTOTIC_PROCESS	GOBP_REGULATION_OF_MITOCHONDRIAL_MEMBRANE_PERMEABILITY_INVOLVED_IN_APOPTOTIC_PROCESS	35	-0.434923	-1.60566	0.0294695	0.119529	0.998	3573	tags=40%, list=23%, signal=52%
GOBP_SPERMATID_NUCLEUS_DIFFERENTIATION	GOBP_SPERMATID_NUCLEUS_DIFFERENTIATION	17	-0.631993	-1.60431	0.0207039	0.119794	0.998	584	tags=18%, list=4%, signal=18%
GOBP_PYRIMIDINE_NUCLEOSIDE_MONOPHOSPHATE_BIOSYNTHETIC_PROCESS	GOBP_PYRIMIDINE_NUCLEOSIDE_MONOPHOSPHATE_BIOSYNTHETIC_PROCESS	15	-0.592036	-1.60229	0.0350877	0.12073	0.998	2050	tags=47%, list=13%, signal=54%
GOBP_ORGANELLE_FISSION	GOBP_ORGANELLE_FISSION	423	-0.502757	-1.60116	0.0416667	0.120835	0.998	1858	tags=31%, list=12%, signal=34%
GOBP_DNA_STRAND_ELONGATION_INVOLVED_IN_DNA_REPLICATION	GOBP_DNA_STRAND_ELONGATION_INVOLVED_IN_DNA_REPLICATION	15	-0.770707	-1.60005	0.0164609	0.120935	0.999	1883	tags=67%, list=12%, signal=76%
GOBP_CELL_CYCLE_DNA_REPLICATION	GOBP_CELL_CYCLE_DNA_REPLICATION	39	-0.718061	-1.59563	0.0327869	0.124294	0.999	1899	tags=56%, list=12%, signal=64%
GOBP_NEGATIVE_REGULATION_OF_METAPHASE_ANAPHASE_TRANSITION_OF_CELL_CYCLE	GOBP_NEGATIVE_REGULATION_OF_METAPHASE_ANAPHASE_TRANSITION_OF_CELL_CYCLE	40	-0.673254	-1.59308	0.0567515	0.125661	0.999	1994	tags=52%, list=13%, signal=60%
GOBP_TELOMERE_MAINTENANCE	GOBP_TELOMERE_MAINTENANCE	122	-0.378179	-1.59131	0.0688976	0.126307	0.999	3194	tags=31%, list=21%, signal=39%
GOBP_MRNA_CLEAVAGE	GOBP_MRNA_CLEAVAGE	18	-0.447513	-1.59109	0.0552268	0.125449	0.999	4930	tags=72%, list=32%, signal=106%
GOBP_MITOTIC_NUCLEAR_DIVISION	GOBP_MITOTIC_NUCLEAR_DIVISION	267	-0.527004	-1.59061	0.0663984	0.124867	0.999	1858	tags=33%, list=12%, signal=36%
GOBP_SPLICEOSOMAL_COMPLEX_ASSEMBLY	GOBP_SPLICEOSOMAL_COMPLEX_ASSEMBLY	50	-0.42268	-1.5862	0.0596708	0.128481	1	3529	tags=44%, list=23%, signal=57%
GOBP_RECOMBINATIONAL_REPAIR	GOBP_RECOMBINATIONAL_REPAIR	132	-0.496719	-1.58567	0.0674847	0.127996	1	3192	tags=42%, list=21%, signal=52%
GOBP_DNA_DEPENDENT_DNA_REPLICATION_MAINTENANCE_OF_FIDELITY	GOBP_DNA_DEPENDENT_DNA_REPLICATION_MAINTENANCE_OF_FIDELITY	36	-0.588978	-1.58552	0.0550098	0.127072	1	1883	tags=44%, list=12%, signal=51%
GOBP_CHROMOSOME_CONDENSATION	GOBP_CHROMOSOME_CONDENSATION	32	-0.611596	-1.58463	0.0627451	0.127012	1	2848	tags=47%, list=19%, signal=57%
GOBP_NUCLEOSOME_MOBILIZATION	GOBP_NUCLEOSOME_MOBILIZATION	20	-0.458962	-1.58411	0.0565302	0.126488	1	1937	tags=25%, list=13%, signal=29%
GOBP_ANAPHASE_PROMOTING_COMPLEX_DEPENDENT_CATABOLIC_PROCESS	GOBP_ANAPHASE_PROMOTING_COMPLEX_DEPENDENT_CATABOLIC_PROCESS	16	-0.677617	-1.583	0.0382166	0.126647	1	1799	tags=38%, list=12%, signal=42%
GOBP_RNA_DEPENDENT_DNA_BIOSYNTHETIC_PROCESS	GOBP_RNA_DEPENDENT_DNA_BIOSYNTHETIC_PROCESS	65	-0.339129	-1.58187	0.0587084	0.126779	1	3194	tags=29%, list=21%, signal=37%
GOBP_NUCLEAR_MEMBRANE_REASSEMBLY	GOBP_NUCLEAR_MEMBRANE_REASSEMBLY	22	-0.458355	-1.57761	0.0666667	0.129961	1	4381	tags=55%, list=29%, signal=76%
GOBP_REGULATION_OF_MITOTIC_SISTER_CHROMATID_SEGREGATION	GOBP_REGULATION_OF_MITOTIC_SISTER_CHROMATID_SEGREGATION	43	-0.664549	-1.57547	0.0784314	0.131109	1	1994	tags=51%, list=13%, signal=59%
GOBP_MEIOTIC_CELL_CYCLE_PROCESS	GOBP_MEIOTIC_CELL_CYCLE_PROCESS	167	-0.582252	-1.57529	0.014	0.130276	1	2661	tags=44%, list=17%, signal=52%
GOBP_MEIOTIC_CELL_CYCLE	GOBP_MEIOTIC_CELL_CYCLE	220	-0.545218	-1.57497	0.0177866	0.129558	1	2661	tags=40%, list=17%, signal=47%
GOBP_DNA_INTEGRITY_CHECKPOINT_SIGNALING	GOBP_DNA_INTEGRITY_CHECKPOINT_SIGNALING	108	-0.486777	-1.57467	0.0691057	0.128879	1	1756	tags=27%, list=11%, signal=30%
GOBP_TELOMERE_ORGANIZATION	GOBP_TELOMERE_ORGANIZATION	126	-0.375559	-1.57281	0.0735587	0.129852	1	3194	tags=31%, list=21%, signal=39%
GOBP_MITOTIC_G2_M_TRANSITION_CHECKPOINT	GOBP_MITOTIC_G2_M_TRANSITION_CHECKPOINT	37	-0.586452	-1.57267	0.0718563	0.129024	1	705	tags=24%, list=5%, signal=25%
GOBP_DNA_REPLICATION_CHECKPOINT_SIGNALING	GOBP_DNA_REPLICATION_CHECKPOINT_SIGNALING	16	-0.778284	-1.5724	0.0262097	0.128316	1	1048	tags=50%, list=7%, signal=54%
GOBP_PROTEIN_LOCALIZATION_TO_CHROMOSOME_CENTROMERIC_REGION	GOBP_PROTEIN_LOCALIZATION_TO_CHROMOSOME_CENTROMERIC_REGION	21	-0.756013	-1.57035	0.0412574	0.129347	1	1823	tags=48%, list=12%, signal=54%
GOBP_REGULATION_OF_SISTER_CHROMATID_COHESION	GOBP_REGULATION_OF_SISTER_CHROMATID_COHESION	16	-0.626235	-1.56286	0.0641283	0.136113	1	765	tags=25%, list=5%, signal=26%
GOBP_REGULATION_OF_SPINDLE_ASSEMBLY	GOBP_REGULATION_OF_SPINDLE_ASSEMBLY	27	-0.508074	-1.56158	0.0793319	0.136469	1	1175	tags=19%, list=8%, signal=20%
GOBP_REGULATION_OF_CELL_CYCLE_G2_M_PHASE_TRANSITION	GOBP_REGULATION_OF_CELL_CYCLE_G2_M_PHASE_TRANSITION	92	-0.533814	-1.56013	0.0591966	0.13702	1	705	tags=22%, list=5%, signal=23%
GOBP_MITOCHONDRIAL_OUTER_MEMBRANE_PERMEABILIZATION_INVOLVED_IN_PROGRAMMED_CELL_DEATH	GOBP_MITOCHONDRIAL_OUTER_MEMBRANE_PERMEABILIZATION_INVOLVED_IN_PROGRAMMED_CELL_DEATH	32	-0.436333	-1.55999	0.0466019	0.136182	1	3323	tags=34%, list=22%, signal=44%
GOBP_COENZYME_A_METABOLIC_PROCESS	GOBP_COENZYME_A_METABOLIC_PROCESS	17	-0.527118	-1.5569	0.0693069	0.138457	1	2873	tags=35%, list=19%, signal=43%
GOBP_RNA_METHYLATION	GOBP_RNA_METHYLATION	62	-0.36893	-1.55473	0.084507	0.13988	1	4692	tags=45%, list=31%, signal=65%
GOBP_POSITIVE_REGULATION_OF_MITOTIC_CELL_CYCLE_PHASE_TRANSITION	GOBP_POSITIVE_REGULATION_OF_MITOTIC_CELL_CYCLE_PHASE_TRANSITION	87	-0.502963	-1.55265	0.0575693	0.141214	1	1445	tags=29%, list=9%, signal=32%
GOBP_DNA_REPLICATION_INITIATION	GOBP_DNA_REPLICATION_INITIATION	36	-0.679532	-1.54958	0.0502092	0.143639	1	2426	tags=58%, list=16%, signal=69%
GOBP_DNA_CONFORMATION_CHANGE	GOBP_DNA_CONFORMATION_CHANGE	249	-0.423272	-1.54954	0.0918367	0.142695	1	3217	tags=36%, list=21%, signal=44%
GOBP_REGULATION_OF_DNA_REPAIR	GOBP_REGULATION_OF_DNA_REPAIR	124	-0.394695	-1.54446	0.0649606	0.147335	1	3266	tags=33%, list=21%, signal=42%
GOBP_CENTROSOME_DUPLICATION	GOBP_CENTROSOME_DUPLICATION	68	-0.464693	-1.5443	0.0641283	0.146507	1	3212	tags=44%, list=21%, signal=56%
GOBP_CELL_CYCLE_G2_M_PHASE_TRANSITION	GOBP_CELL_CYCLE_G2_M_PHASE_TRANSITION	136	-0.487648	-1.54403	0.0701031	0.145845	1	2534	tags=35%, list=17%, signal=42%
GOBP_REGULATION_OF_CENTRIOLE_REPLICATION	GOBP_REGULATION_OF_CENTRIOLE_REPLICATION	21	-0.572269	-1.54208	0.06	0.147056	1	1455	tags=43%, list=9%, signal=47%
GOBP_MITOTIC_DNA_INTEGRITY_CHECKPOINT_SIGNALING	GOBP_MITOTIC_DNA_INTEGRITY_CHECKPOINT_SIGNALING	74	-0.472705	-1.542	0.0775348	0.146136	1	1119	tags=23%, list=7%, signal=25%
GOBP_MITOCHONDRIAL_TRANSPORT	GOBP_MITOCHONDRIAL_TRANSPORT	157	-0.292094	-1.53961	0.0512821	0.147758	1	3675	tags=37%, list=24%, signal=48%
GOBP_PEPTIDYL_LYSINE_DIMETHYLATION	GOBP_PEPTIDYL_LYSINE_DIMETHYLATION	19	-0.513218	-1.53574	0.0629921	0.151143	1	1935	tags=21%, list=13%, signal=24%
GOBP_FEMALE_MEIOTIC_NUCLEAR_DIVISION	GOBP_FEMALE_MEIOTIC_NUCLEAR_DIVISION	23	-0.724764	-1.5342	0.0491159	0.151863	1	1603	tags=52%, list=10%, signal=58%
GOBP_ESTABLISHMENT_OF_PROTEIN_LOCALIZATION_TO_MITOCHONDRIAL_MEMBRANE	GOBP_ESTABLISHMENT_OF_PROTEIN_LOCALIZATION_TO_MITOCHONDRIAL_MEMBRANE	24	-0.445541	-1.52912	0.0664062	0.156611	1	4141	tags=46%, list=27%, signal=63%
GOBP_MEIOTIC_CHROMOSOME_SEGREGATION	GOBP_MEIOTIC_CHROMOSOME_SEGREGATION	70	-0.623785	-1.52605	0.0555556	0.158967	1	2620	tags=46%, list=17%, signal=55%
GOBP_PROTEIN_DNA_COMPLEX_SUBUNIT_ORGANIZATION	GOBP_PROTEIN_DNA_COMPLEX_SUBUNIT_ORGANIZATION	162	-0.404233	-1.52273	0.0894309	0.161838	1	3195	tags=35%, list=21%, signal=43%
GOBP_NEGATIVE_REGULATION_OF_CELL_CYCLE_G2_M_PHASE_TRANSITION	GOBP_NEGATIVE_REGULATION_OF_CELL_CYCLE_G2_M_PHASE_TRANSITION	50	-0.517459	-1.52061	0.0959184	0.163202	1	705	tags=22%, list=5%, signal=23%
GOBP_TRANSCRIPTION_BY_RNA_POLYMERASE_III	GOBP_TRANSCRIPTION_BY_RNA_POLYMERASE_III	49	-0.338227	-1.51995	0.0600414	0.162966	1	4164	tags=47%, list=27%, signal=64%
GOBP_ALDITOL_METABOLIC_PROCESS	GOBP_ALDITOL_METABOLIC_PROCESS	20	-0.643514	-1.51979	0.0309278	0.162171	1	3616	tags=65%, list=24%, signal=85%
GOBP_TRNA_METHYLATION	GOBP_TRNA_METHYLATION	32	-0.429604	-1.51961	0.0843137	0.16136	1	4049	tags=47%, list=26%, signal=64%
GOBP_MICROTUBULE_ORGANIZING_CENTER_ORGANIZATION	GOBP_MICROTUBULE_ORGANIZING_CENTER_ORGANIZATION	135	-0.40955	-1.51805	0.0657371	0.162152	1	1863	tags=25%, list=12%, signal=28%
GOBP_MITOTIC_CYTOKINESIS	GOBP_MITOTIC_CYTOKINESIS	68	-0.43943	-1.51719	0.0980392	0.162111	1	1489	tags=24%, list=10%, signal=26%
GOBP_POSITIVE_REGULATION_OF_CELL_CYCLE_PHASE_TRANSITION	GOBP_POSITIVE_REGULATION_OF_CELL_CYCLE_PHASE_TRANSITION	106	-0.469998	-1.51618	0.0576923	0.162259	1	1445	tags=27%, list=9%, signal=30%
GOBP_PROTEIN_LOCALIZATION_TO_MITOCHONDRION	GOBP_PROTEIN_LOCALIZATION_TO_MITOCHONDRION	109	-0.302459	-1.51561	0.0638723	0.161955	1	3613	tags=37%, list=24%, signal=48%
GOBP_NEGATIVE_REGULATION_OF_NUCLEAR_DIVISION	GOBP_NEGATIVE_REGULATION_OF_NUCLEAR_DIVISION	53	-0.611548	-1.51435	0.0732673	0.162297	1	2138	tags=49%, list=14%, signal=57%
GOBP_POSITIVE_REGULATION_OF_METAPHASE_ANAPHASE_TRANSITION_OF_CELL_CYCLE	GOBP_POSITIVE_REGULATION_OF_METAPHASE_ANAPHASE_TRANSITION_OF_CELL_CYCLE	16	-0.64509	-1.50579	0.0547667	0.171346	1	1767	tags=38%, list=12%, signal=42%
GOBP_PROTEIN_LOCALIZATION_TO_CONDENSED_CHROMOSOME	GOBP_PROTEIN_LOCALIZATION_TO_CONDENSED_CHROMOSOME	15	-0.798242	-1.50524	0.035503	0.170928	1	1823	tags=60%, list=12%, signal=68%
GOBP_VIRAL_BUDDING	GOBP_VIRAL_BUDDING	24	-0.419583	-1.50293	0.08577	0.172717	1	4120	tags=46%, list=27%, signal=63%
GOBP_MEIOSIS_I_CELL_CYCLE_PROCESS	GOBP_MEIOSIS_I_CELL_CYCLE_PROCESS	104	-0.585186	-1.50271	0.0440882	0.171966	1	2620	tags=43%, list=17%, signal=52%
GOBP_POLYAMINE_METABOLIC_PROCESS	GOBP_POLYAMINE_METABOLIC_PROCESS	17	-0.51092	-1.50255	0.0838323	0.171142	1	1680	tags=24%, list=11%, signal=26%
GOBP_CENTROMERE_COMPLEX_ASSEMBLY	GOBP_CENTROMERE_COMPLEX_ASSEMBLY	24	-0.80037	-1.50179	0.0343434	0.171126	1	1404	tags=58%, list=9%, signal=64%
GOBP_INTRA_GOLGI_VESICLE_MEDIATED_TRANSPORT	GOBP_INTRA_GOLGI_VESICLE_MEDIATED_TRANSPORT	29	-0.406665	-1.49861	0.0817996	0.173955	1	4344	tags=48%, list=28%, signal=67%
GOBP_REGULATION_OF_DOUBLE_STRAND_BREAK_REPAIR	GOBP_REGULATION_OF_DOUBLE_STRAND_BREAK_REPAIR	87	-0.418124	-1.49725	0.084	0.174572	1	3192	tags=33%, list=21%, signal=42%
GOBP_REGULATION_OF_TELOMERE_MAINTENANCE_VIA_TELOMERE_LENGTHENING	GOBP_REGULATION_OF_TELOMERE_MAINTENANCE_VIA_TELOMERE_LENGTHENING	55	-0.341557	-1.49377	0.0833333	0.177863	1	3194	tags=31%, list=21%, signal=39%
GOBP_PROTEIN_TARGETING_TO_MITOCHONDRION	GOBP_PROTEIN_TARGETING_TO_MITOCHONDRION	88	-0.300458	-1.49189	0.0836653	0.179108	1	3613	tags=40%, list=24%, signal=52%
GOBP_DNA_UNWINDING_INVOLVED_IN_DNA_REPLICATION	GOBP_DNA_UNWINDING_INVOLVED_IN_DNA_REPLICATION	21	-0.71622	-1.49051	0.0752033	0.17974	1	1612	tags=52%, list=10%, signal=58%
GOBP_POST_TRANSLATIONAL_PROTEIN_MODIFICATION	GOBP_POST_TRANSLATIONAL_PROTEIN_MODIFICATION	34	-0.409338	-1.48937	0.0748988	0.180111	1	1915	tags=18%, list=12%, signal=20%
GOBP_MEIOTIC_CHROMOSOME_SEPARATION	GOBP_MEIOTIC_CHROMOSOME_SEPARATION	19	-0.691271	-1.48836	0.0693878	0.180329	1	357	tags=26%, list=2%, signal=27%
GOBP_POSITIVE_REGULATION_OF_MITOTIC_CELL_CYCLE	GOBP_POSITIVE_REGULATION_OF_MITOTIC_CELL_CYCLE	115	-0.434003	-1.48421	0.0794297	0.184444	1	1859	tags=27%, list=12%, signal=30%
GOBP_REGULATION_OF_CELL_CYCLE_CHECKPOINT	GOBP_REGULATION_OF_CELL_CYCLE_CHECKPOINT	30	-0.527745	-1.48044	0.0912698	0.18809	1	1994	tags=37%, list=13%, signal=42%
GOBP_REPLICATION_FORK_PROCESSING	GOBP_REPLICATION_FORK_PROCESSING	28	-0.577257	-1.47979	0.0949612	0.187814	1	1883	tags=39%, list=12%, signal=45%
GOBP_CYTOCHROME_COMPLEX_ASSEMBLY	GOBP_CYTOCHROME_COMPLEX_ASSEMBLY	20	-0.424264	-1.47594	0.095723	0.191876	1	2766	tags=40%, list=18%, signal=49%
GOBP_CYTOKINESIS	GOBP_CYTOKINESIS	147	-0.402806	-1.47459	0.105051	0.192571	1	1489	tags=18%, list=10%, signal=20%
GOBP_HISTONE_MRNA_METABOLIC_PROCESS	GOBP_HISTONE_MRNA_METABOLIC_PROCESS	20	-0.456084	-1.47313	0.09375	0.193523	1	2821	tags=45%, list=18%, signal=55%
GOBP_MITOTIC_SISTER_CHROMATID_COHESION	GOBP_MITOTIC_SISTER_CHROMATID_COHESION	23	-0.526226	-1.46924	0.118343	0.197611	1	816	tags=17%, list=5%, signal=18%
GOBP_POSITIVE_REGULATION_OF_CHROMOSOME_SEPARATION	GOBP_POSITIVE_REGULATION_OF_CHROMOSOME_SEPARATION	18	-0.591506	-1.46883	0.0741483	0.197083	1	1767	tags=33%, list=12%, signal=38%
GOBP_NUCLEAR_ENVELOPE_ORGANIZATION	GOBP_NUCLEAR_ENVELOPE_ORGANIZATION	54	-0.340626	-1.46155	0.0959693	0.205729	1	1311	tags=17%, list=9%, signal=18%
GOBP_HOMOLOGOUS_RECOMBINATION	GOBP_HOMOLOGOUS_RECOMBINATION	48	-0.57307	-1.45818	0.0901804	0.20908	1	1730	tags=27%, list=11%, signal=30%
GOBP_PROTEIN_LOCALIZATION_TO_CHROMOSOME	GOBP_PROTEIN_LOCALIZATION_TO_CHROMOSOME	78	-0.467876	-1.45811	0.165992	0.208078	1	3194	tags=42%, list=21%, signal=53%
GOBP_REGULATION_OF_MEIOTIC_CELL_CYCLE	GOBP_REGULATION_OF_MEIOTIC_CELL_CYCLE	46	-0.565744	-1.45808	0.0641283	0.207036	1	2352	tags=39%, list=15%, signal=46%
GOBP_MRNA_PROCESSING	GOBP_MRNA_PROCESSING	410	-0.239246	-1.45692	0.104839	0.207582	1	3802	tags=29%, list=25%, signal=38%
GOBP_MITOCHONDRIAL_MEMBRANE_ORGANIZATION	GOBP_MITOCHONDRIAL_MEMBRANE_ORGANIZATION	93	-0.300809	-1.45571	0.084453	0.208152	1	4141	tags=45%, list=27%, signal=61%
GOBP_NEGATIVE_REGULATION_OF_DNA_REPAIR	GOBP_NEGATIVE_REGULATION_OF_DNA_REPAIR	26	-0.550344	-1.45341	0.0996094	0.210037	1	2737	tags=35%, list=18%, signal=42%
GOBP_NUCLEOTIDE_SUGAR_BIOSYNTHETIC_PROCESS	GOBP_NUCLEOTIDE_SUGAR_BIOSYNTHETIC_PROCESS	15	-0.489562	-1.45206	0.107784	0.210622	1	2632	tags=47%, list=17%, signal=56%
GOBP_KINETOCHORE_ORGANIZATION	GOBP_KINETOCHORE_ORGANIZATION	19	-0.817243	-1.45029	0.0618763	0.211969	1	1724	tags=68%, list=11%, signal=77%
GOBP_RNA_LOCALIZATION	GOBP_RNA_LOCALIZATION	171	-0.281471	-1.44967	0.114458	0.211733	1	4258	tags=42%, list=28%, signal=58%
GOBP_INTERSTRAND_CROSS_LINK_REPAIR	GOBP_INTERSTRAND_CROSS_LINK_REPAIR	24	-0.553072	-1.44943	0.123732	0.210983	1	3185	tags=46%, list=21%, signal=58%
GOBP_GLUTAMINE_METABOLIC_PROCESS	GOBP_GLUTAMINE_METABOLIC_PROCESS	21	-0.585144	-1.44731	0.0582329	0.212808	1	2672	tags=52%, list=17%, signal=63%
GOBP_POSTREPLICATION_REPAIR	GOBP_POSTREPLICATION_REPAIR	29	-0.430924	-1.44594	0.12024	0.21353	1	2650	tags=34%, list=17%, signal=42%
GOBP_POSITIVE_REGULATION_OF_DNA_REPAIR	GOBP_POSITIVE_REGULATION_OF_DNA_REPAIR	77	-0.369727	-1.444	0.0836653	0.215109	1	3489	tags=34%, list=23%, signal=43%
GOBP_MITOTIC_CELL_CYCLE_PHASE_TRANSITION	GOBP_MITOTIC_CELL_CYCLE_PHASE_TRANSITION	383	-0.385468	-1.43994	0.126761	0.219603	1	1446	tags=22%, list=9%, signal=24%
GOBP_MONOUBIQUITINATED_PROTEIN_DEUBIQUITINATION	GOBP_MONOUBIQUITINATED_PROTEIN_DEUBIQUITINATION	31	-0.343389	-1.43757	0.0938124	0.221823	1	3948	tags=39%, list=26%, signal=52%
GOBP_REGULATION_OF_DOUBLE_STRAND_BREAK_REPAIR_VIA_HOMOLOGOUS_RECOMBINATION	GOBP_REGULATION_OF_DOUBLE_STRAND_BREAK_REPAIR_VIA_HOMOLOGOUS_RECOMBINATION	57	-0.44923	-1.43625	0.121086	0.222474	1	3192	tags=35%, list=21%, signal=44%
GOBP_TETRAHYDROFOLATE_METABOLIC_PROCESS	GOBP_TETRAHYDROFOLATE_METABOLIC_PROCESS	17	-0.552245	-1.43461	0.0685484	0.223688	1	3293	tags=71%, list=21%, signal=90%
GOBP_REGULATION_OF_UBIQUITIN_PROTEIN_TRANSFERASE_ACTIVITY	GOBP_REGULATION_OF_UBIQUITIN_PROTEIN_TRANSFERASE_ACTIVITY	53	-0.429005	-1.43225	0.11359	0.225951	1	1230	tags=19%, list=8%, signal=20%
GOBP_RNA_SPLICING_VIA_TRANSESTERIFICATION_REACTIONS	GOBP_RNA_SPLICING_VIA_TRANSESTERIFICATION_REACTIONS	264	-0.247366	-1.42897	0.133874	0.229496	1	4627	tags=34%, list=30%, signal=48%
GOBP_CHROMOSOME_ORGANIZATION_INVOLVED_IN_MEIOTIC_CELL_CYCLE	GOBP_CHROMOSOME_ORGANIZATION_INVOLVED_IN_MEIOTIC_CELL_CYCLE	53	-0.580155	-1.42671	0.0983936	0.231716	1	2651	tags=47%, list=17%, signal=57%
GOBP_POSITIVE_REGULATION_OF_DOUBLE_STRAND_BREAK_REPAIR	GOBP_POSITIVE_REGULATION_OF_DOUBLE_STRAND_BREAK_REPAIR	51	-0.382319	-1.4263	0.113169	0.231187	1	3192	tags=31%, list=21%, signal=39%
GOBP_NEGATIVE_REGULATION_OF_PROTEASOMAL_UBIQUITIN_DEPENDENT_PROTEIN_CATABOLIC_PROCESS	GOBP_NEGATIVE_REGULATION_OF_PROTEASOMAL_UBIQUITIN_DEPENDENT_PROTEIN_CATABOLIC_PROCESS	30	-0.338995	-1.42162	0.0887097	0.23677	1	712	tags=7%, list=5%, signal=7%
GOBP_REGULATION_OF_CYTOKINESIS	GOBP_REGULATION_OF_CYTOKINESIS	82	-0.441616	-1.41764	0.132265	0.241314	1	600	tags=16%, list=4%, signal=16%
GOBP_REGULATION_OF_UBIQUITIN_PROTEIN_LIGASE_ACTIVITY	GOBP_REGULATION_OF_UBIQUITIN_PROTEIN_LIGASE_ACTIVITY	24	-0.578451	-1.41679	0.121399	0.241428	1	1603	tags=33%, list=10%, signal=37%
GOBP_MITOTIC_G2_DNA_DAMAGE_CHECKPOINT_SIGNALING	GOBP_MITOTIC_G2_DNA_DAMAGE_CHECKPOINT_SIGNALING	28	-0.550559	-1.41522	0.145709	0.242465	1	705	tags=25%, list=5%, signal=26%
GOBP_REGULATION_OF_MITOTIC_CELL_CYCLE_PHASE_TRANSITION	GOBP_REGULATION_OF_MITOTIC_CELL_CYCLE_PHASE_TRANSITION	272	-0.397052	-1.40922	0.14959	0.250163	1	1446	tags=22%, list=9%, signal=24%
GOBP_REGULATION_OF_CELL_CYCLE_PHASE_TRANSITION	GOBP_REGULATION_OF_CELL_CYCLE_PHASE_TRANSITION	350	-0.382849	-1.40386	0.132653	0.256848	1	1767	tags=24%, list=12%, signal=27%
GOBP_HISTONE_H3_K9_TRIMETHYLATION	GOBP_HISTONE_H3_K9_TRIMETHYLATION	17	-0.477181	-1.40252	0.105788	0.257663	1	1302	tags=24%, list=8%, signal=26%
GOBP_CELL_CYCLE_PHASE_TRANSITION	GOBP_CELL_CYCLE_PHASE_TRANSITION	465	-0.368028	-1.40103	0.135628	0.258708	1	1823	tags=24%, list=12%, signal=26%
GOBP_NADH_DEHYDROGENASE_COMPLEX_ASSEMBLY	GOBP_NADH_DEHYDROGENASE_COMPLEX_ASSEMBLY	44	-0.400639	-1.40014	0.176471	0.258853	1	4399	tags=43%, list=29%, signal=60%
GOBP_NEGATIVE_REGULATION_OF_CELL_DIVISION	GOBP_NEGATIVE_REGULATION_OF_CELL_DIVISION	17	-0.632461	-1.39721	0.0930693	0.262168	1	600	tags=41%, list=4%, signal=43%
GOBP_RNA_PHOSPHODIESTER_BOND_HYDROLYSIS_ENDONUCLEOLYTIC	GOBP_RNA_PHOSPHODIESTER_BOND_HYDROLYSIS_ENDONUCLEOLYTIC	66	-0.354743	-1.39709	0.0987654	0.261123	1	3070	tags=41%, list=20%, signal=51%
GOBP_POSITIVE_REGULATION_OF_DOUBLE_STRAND_BREAK_REPAIR_VIA_HOMOLOGOUS_RECOMBINATION	GOBP_POSITIVE_REGULATION_OF_DOUBLE_STRAND_BREAK_REPAIR_VIA_HOMOLOGOUS_RECOMBINATION	33	-0.41105	-1.39395	0.140845	0.264734	1	3489	tags=36%, list=23%, signal=47%
GOBP_NEGATIVE_REGULATION_OF_MEIOTIC_CELL_CYCLE	GOBP_NEGATIVE_REGULATION_OF_MEIOTIC_CELL_CYCLE	16	-0.628553	-1.39322	0.088	0.264637	1	2138	tags=56%, list=14%, signal=65%
GOBP_PROTEIN_DNA_COMPLEX_ASSEMBLY	GOBP_PROTEIN_DNA_COMPLEX_ASSEMBLY	112	-0.427659	-1.39237	0.167331	0.264775	1	1574	tags=24%, list=10%, signal=27%
GOBP_POSITIVE_REGULATION_OF_UBIQUITIN_PROTEIN_TRANSFERASE_ACTIVITY	GOBP_POSITIVE_REGULATION_OF_UBIQUITIN_PROTEIN_TRANSFERASE_ACTIVITY	29	-0.465257	-1.39012	0.131846	0.267119	1	998	tags=21%, list=6%, signal=22%
GOBP_NEGATIVE_REGULATION_OF_CELL_CYCLE_PROCESS	GOBP_NEGATIVE_REGULATION_OF_CELL_CYCLE_PROCESS	249	-0.393828	-1.38985	0.146881	0.266364	1	1858	tags=26%, list=12%, signal=29%
GOBP_SPINDLE_LOCALIZATION	GOBP_SPINDLE_LOCALIZATION	51	-0.443269	-1.38897	0.0955285	0.26652	1	1823	tags=24%, list=12%, signal=27%
GOBP_HOMOLOGOUS_CHROMOSOME_SEGREGATION	GOBP_HOMOLOGOUS_CHROMOSOME_SEGREGATION	44	-0.572205	-1.3879	0.101961	0.267	1	2620	tags=48%, list=17%, signal=57%
GOBP_PROTEIN_MANNOSYLATION	GOBP_PROTEIN_MANNOSYLATION	15	-0.538169	-1.38781	0.11306	0.265947	1	4633	tags=67%, list=30%, signal=95%
GOBP_NEGATIVE_REGULATION_OF_CELL_CYCLE_PHASE_TRANSITION	GOBP_NEGATIVE_REGULATION_OF_CELL_CYCLE_PHASE_TRANSITION	209	-0.394402	-1.38455	0.151822	0.269708	1	1758	tags=25%, list=11%, signal=28%
GOBP_REGULATION_OF_MEIOTIC_NUCLEAR_DIVISION	GOBP_REGULATION_OF_MEIOTIC_NUCLEAR_DIVISION	29	-0.562276	-1.38381	0.0760234	0.269696	1	2352	tags=45%, list=15%, signal=53%
GOBP_POSITIVE_REGULATION_OF_TELOMERE_MAINTENANCE_VIA_TELOMERE_LENGTHENING	GOBP_POSITIVE_REGULATION_OF_TELOMERE_MAINTENANCE_VIA_TELOMERE_LENGTHENING	36	-0.367869	-1.3833	0.130097	0.269319	1	3448	tags=36%, list=22%, signal=46%
GOBP_POSITIVE_REGULATION_OF_CHROMOSOME_ORGANIZATION	GOBP_POSITIVE_REGULATION_OF_CHROMOSOME_ORGANIZATION	78	-0.33471	-1.38245	0.156187	0.269408	1	3194	tags=32%, list=21%, signal=40%
GOBP_MRNA_CIS_SPLICING_VIA_SPLICEOSOME	GOBP_MRNA_CIS_SPLICING_VIA_SPLICEOSOME	22	-0.405624	-1.38109	0.142	0.270208	1	5575	tags=59%, list=36%, signal=93%
GOBP_NEGATIVE_REGULATION_OF_RNA_SPLICING	GOBP_NEGATIVE_REGULATION_OF_RNA_SPLICING	24	-0.401579	-1.37526	0.143713	0.277963	1	4265	tags=38%, list=28%, signal=52%
GOBP_RNA_PHOSPHODIESTER_BOND_HYDROLYSIS	GOBP_RNA_PHOSPHODIESTER_BOND_HYDROLYSIS	128	-0.291605	-1.375	0.113402	0.277135	1	3399	tags=38%, list=22%, signal=48%
GOBP_MITOTIC_INTRA_S_DNA_DAMAGE_CHECKPOINT_SIGNALING	GOBP_MITOTIC_INTRA_S_DNA_DAMAGE_CHECKPOINT_SIGNALING	16	-0.56964	-1.37417	0.155242	0.27719	1	1119	tags=31%, list=7%, signal=34%
GOBP_TELOMERE_MAINTENANCE_VIA_TELOMERE_LENGTHENING	GOBP_TELOMERE_MAINTENANCE_VIA_TELOMERE_LENGTHENING	73	-0.295789	-1.37319	0.135029	0.277592	1	3194	tags=27%, list=21%, signal=34%
GOBP_RNA_POLYADENYLATION	GOBP_RNA_POLYADENYLATION	43	-0.315609	-1.37099	0.135903	0.279803	1	3921	tags=42%, list=26%, signal=56%
GOBP_NUCLEOTIDE_EXCISION_REPAIR	GOBP_NUCLEOTIDE_EXCISION_REPAIR	54	-0.354349	-1.37095	0.16381	0.278684	1	2941	tags=37%, list=19%, signal=46%
GOBP_LATE_ENDOSOME_TO_VACUOLE_TRANSPORT	GOBP_LATE_ENDOSOME_TO_VACUOLE_TRANSPORT	23	-0.373129	-1.36802	0.146825	0.282091	1	4120	tags=39%, list=27%, signal=53%
GOBP_POSITIVE_REGULATION_OF_MITOCHONDRIAL_FISSION	GOBP_POSITIVE_REGULATION_OF_MITOCHONDRIAL_FISSION	17	-0.422698	-1.36585	0.126415	0.284314	1	1613	tags=24%, list=11%, signal=26%
GOBP_DNA_TEMPLATED_TRANSCRIPTION_ELONGATION	GOBP_DNA_TEMPLATED_TRANSCRIPTION_ELONGATION	65	-0.274135	-1.36583	0.136929	0.283148	1	4229	tags=38%, list=28%, signal=53%
GOBP_TRANSCRIPTION_INITIATION_FROM_RNA_POLYMERASE_II_PROMOTER	GOBP_TRANSCRIPTION_INITIATION_FROM_RNA_POLYMERASE_II_PROMOTER	69	-0.301833	-1.36322	0.116667	0.285979	1	3377	tags=30%, list=22%, signal=39%
GOBP_POSITIVE_REGULATION_OF_MRNA_PROCESSING	GOBP_POSITIVE_REGULATION_OF_MRNA_PROCESSING	31	-0.418349	-1.36185	0.132505	0.286949	1	3327	tags=39%, list=22%, signal=49%
GOBP_REGULATION_OF_NUCLEAR_DIVISION	GOBP_REGULATION_OF_NUCLEAR_DIVISION	130	-0.480745	-1.36118	0.134653	0.286833	1	1858	tags=35%, list=12%, signal=40%
GOBP_RNA_PHOSPHODIESTER_BOND_HYDROLYSIS_EXONUCLEOLYTIC	GOBP_RNA_PHOSPHODIESTER_BOND_HYDROLYSIS_EXONUCLEOLYTIC	39	-0.323894	-1.36065	0.143141	0.286457	1	4448	tags=41%, list=29%, signal=58%
GOBP_BLASTOCYST_GROWTH	GOBP_BLASTOCYST_GROWTH	18	-0.615234	-1.36005	0.140684	0.286298	1	1641	tags=33%, list=11%, signal=37%
GOBP_NUCLEOSIDE_MONOPHOSPHATE_BIOSYNTHETIC_PROCESS	GOBP_NUCLEOSIDE_MONOPHOSPHATE_BIOSYNTHETIC_PROCESS	40	-0.407784	-1.35609	0.14786	0.291636	1	2419	tags=38%, list=16%, signal=44%
GOBP_HISTONE_H2A_ACETYLATION	GOBP_HISTONE_H2A_ACETYLATION	21	-0.383623	-1.35369	0.15735	0.294183	1	3489	tags=33%, list=23%, signal=43%
GOBP_PROTEIN_LOCALIZATION_TO_MICROTUBULE_ORGANIZING_CENTER	GOBP_PROTEIN_LOCALIZATION_TO_MICROTUBULE_ORGANIZING_CENTER	33	-0.368565	-1.35227	0.160417	0.295157	1	690	tags=9%, list=4%, signal=9%
GOBP_GONADOTROPIN_SECRETION	GOBP_GONADOTROPIN_SECRETION	15	-0.642583	-1.35218	0.0947581	0.294111	1	1300	tags=33%, list=8%, signal=36%
GOBP_REGULATION_OF_MITOTIC_CELL_CYCLE_SPINDLE_ASSEMBLY_CHECKPOINT	GOBP_REGULATION_OF_MITOTIC_CELL_CYCLE_SPINDLE_ASSEMBLY_CHECKPOINT	16	-0.584469	-1.34839	0.161355	0.298933	1	1994	tags=50%, list=13%, signal=57%
GOBP_TRANSLATIONAL_INITIATION	GOBP_TRANSLATIONAL_INITIATION	106	-0.243063	-1.34803	0.144016	0.298395	1	3529	tags=31%, list=23%, signal=40%
GOBP_PIGMENT_BIOSYNTHETIC_PROCESS	GOBP_PIGMENT_BIOSYNTHETIC_PROCESS	62	-0.353874	-1.34646	0.0800821	0.299778	1	2501	tags=34%, list=16%, signal=40%
GOBP_MITOTIC_CHROMOSOME_CONDENSATION	GOBP_MITOTIC_CHROMOSOME_CONDENSATION	17	-0.606296	-1.34599	0.193159	0.299345	1	2081	tags=41%, list=14%, signal=48%
GOBP_POSITIVE_REGULATION_OF_MEMBRANE_PERMEABILITY	GOBP_POSITIVE_REGULATION_OF_MEMBRANE_PERMEABILITY	39	-0.359841	-1.34315	0.134241	0.302494	1	2941	tags=33%, list=19%, signal=41%
GOBP_REGULATION_OF_TELOMERE_MAINTENANCE	GOBP_REGULATION_OF_TELOMERE_MAINTENANCE	72	-0.267937	-1.34242	0.170974	0.302465	1	3194	tags=25%, list=21%, signal=31%
GOBP_SERINE_FAMILY_AMINO_ACID_BIOSYNTHETIC_PROCESS	GOBP_SERINE_FAMILY_AMINO_ACID_BIOSYNTHETIC_PROCESS	15	-0.563439	-1.33879	0.161885	0.306998	1	2291	tags=47%, list=15%, signal=55%
GOBP_HISTONE_DEUBIQUITINATION	GOBP_HISTONE_DEUBIQUITINATION	36	-0.3181	-1.3372	0.162698	0.308359	1	3948	tags=39%, list=26%, signal=52%
GOBP_REGULATION_OF_MITOTIC_CELL_CYCLE	GOBP_REGULATION_OF_MITOTIC_CELL_CYCLE	414	-0.355377	-1.335	0.15213	0.310716	1	1859	tags=24%, list=12%, signal=26%
GOBP_POSITIVE_REGULATION_OF_CELL_CYCLE_PROCESS	GOBP_POSITIVE_REGULATION_OF_CELL_CYCLE_PROCESS	213	-0.397511	-1.33439	0.156627	0.310529	1	1859	tags=27%, list=12%, signal=30%
GOBP_REGULATION_OF_MITOTIC_NUCLEAR_DIVISION	GOBP_REGULATION_OF_MITOTIC_NUCLEAR_DIVISION	105	-0.483474	-1.33102	0.186898	0.314925	1	1858	tags=37%, list=12%, signal=42%
GOBP_POSITIVE_REGULATION_OF_HISTONE_METHYLATION	GOBP_POSITIVE_REGULATION_OF_HISTONE_METHYLATION	41	-0.35563	-1.32943	0.150206	0.316387	1	1851	tags=17%, list=12%, signal=19%
GOBP_POLYOL_CATABOLIC_PROCESS	GOBP_POLYOL_CATABOLIC_PROCESS	24	-0.454251	-1.32614	0.141717	0.320544	1	2599	tags=46%, list=17%, signal=55%
GOBP_NEURONAL_STEM_CELL_POPULATION_MAINTENANCE	GOBP_NEURONAL_STEM_CELL_POPULATION_MAINTENANCE	22	-0.539758	-1.32611	0.12685	0.319383	1	2620	tags=36%, list=17%, signal=44%
GOBP_NEGATIVE_REGULATION_OF_MITOTIC_CELL_CYCLE	GOBP_NEGATIVE_REGULATION_OF_MITOTIC_CELL_CYCLE	191	-0.369144	-1.32294	0.176	0.323365	1	1119	tags=20%, list=7%, signal=22%
GOBP_RNA_SPLICING	GOBP_RNA_SPLICING	356	-0.211985	-1.31935	0.169661	0.328139	1	4627	tags=34%, list=30%, signal=48%
GOBP_NEGATIVE_REGULATION_OF_MRNA_PROCESSING	GOBP_NEGATIVE_REGULATION_OF_MRNA_PROCESSING	27	-0.362883	-1.31924	0.186275	0.327099	1	9795	tags=100%, list=64%, signal=276%
GOBP_RNA_MODIFICATION	GOBP_RNA_MODIFICATION	133	-0.292339	-1.31829	0.167355	0.327493	1	4692	tags=47%, list=31%, signal=68%
GOBP_CENTRIOLE_ASSEMBLY	GOBP_CENTRIOLE_ASSEMBLY	43	-0.426378	-1.31708	0.178862	0.328311	1	1788	tags=28%, list=12%, signal=31%
GOBP_RIBONUCLEOSIDE_MONOPHOSPHATE_BIOSYNTHETIC_PROCESS	GOBP_RIBONUCLEOSIDE_MONOPHOSPHATE_BIOSYNTHETIC_PROCESS	32	-0.421494	-1.31648	0.154143	0.32804	1	2749	tags=41%, list=18%, signal=49%
GOBP_NEGATIVE_REGULATION_OF_MITOTIC_CELL_CYCLE_PHASE_TRANSITION	GOBP_NEGATIVE_REGULATION_OF_MITOTIC_CELL_CYCLE_PHASE_TRANSITION	147	-0.38792	-1.31447	0.204	0.330128	1	1823	tags=26%, list=12%, signal=29%
GOBP_POSITIVE_REGULATION_OF_TELOMERE_MAINTENANCE	GOBP_POSITIVE_REGULATION_OF_TELOMERE_MAINTENANCE	47	-0.304044	-1.31186	0.168279	0.33327	1	3194	tags=28%, list=21%, signal=35%
GOBP_POSITIVE_REGULATION_OF_CELL_CYCLE	GOBP_POSITIVE_REGULATION_OF_CELL_CYCLE	288	-0.372288	-1.31094	0.145455	0.333635	1	1859	tags=26%, list=12%, signal=29%
GOBP_REGULATION_OF_HISTONE_H3_K9_METHYLATION	GOBP_REGULATION_OF_HISTONE_H3_K9_METHYLATION	24	-0.402687	-1.30889	0.185336	0.335958	1	705	tags=13%, list=5%, signal=13%
GOBP_DEOXYRIBONUCLEOTIDE_BIOSYNTHETIC_PROCESS	GOBP_DEOXYRIBONUCLEOTIDE_BIOSYNTHETIC_PROCESS	15	-0.471921	-1.30265	0.177419	0.345409	1	1942	tags=33%, list=13%, signal=38%
GOBP_GLYCOSYL_COMPOUND_BIOSYNTHETIC_PROCESS	GOBP_GLYCOSYL_COMPOUND_BIOSYNTHETIC_PROCESS	16	-0.459394	-1.30257	0.152893	0.344312	1	2467	tags=38%, list=16%, signal=45%
GOBP_DNA_PACKAGING	GOBP_DNA_PACKAGING	161	-0.326176	-1.302	0.182927	0.344017	1	1157	tags=15%, list=8%, signal=16%
GOBP_MICROTUBULE_ORGANIZING_CENTER_LOCALIZATION	GOBP_MICROTUBULE_ORGANIZING_CENTER_LOCALIZATION	29	-0.438404	-1.30123	0.177645	0.34408	1	343	tags=14%, list=2%, signal=14%
GOBP_TELOMERE_MAINTENANCE_VIA_RECOMBINATION	GOBP_TELOMERE_MAINTENANCE_VIA_RECOMBINATION	15	-0.49088	-1.29804	0.221328	0.348484	1	3760	tags=47%, list=24%, signal=62%
GOBP_HOMOLOGOUS_CHROMOSOME_PAIRING_AT_MEIOSIS	GOBP_HOMOLOGOUS_CHROMOSOME_PAIRING_AT_MEIOSIS	37	-0.549829	-1.29697	0.143713	0.349067	1	2620	tags=46%, list=17%, signal=55%
GOBP_MITOTIC_RECOMBINATION	GOBP_MITOTIC_RECOMBINATION	25	-0.488398	-1.29351	0.197652	0.353814	1	2527	tags=48%, list=16%, signal=57%
GOBP_NEGATIVE_REGULATION_OF_UBIQUITIN_PROTEIN_TRANSFERASE_ACTIVITY	GOBP_NEGATIVE_REGULATION_OF_UBIQUITIN_PROTEIN_TRANSFERASE_ACTIVITY	22	-0.504582	-1.2897	0.215726	0.359126	1	1230	tags=23%, list=8%, signal=25%
GOBP_LATE_ENDOSOME_TO_VACUOLE_TRANSPORT_VIA_MULTIVESICULAR_BODY_SORTING_PATHWAY	GOBP_LATE_ENDOSOME_TO_VACUOLE_TRANSPORT_VIA_MULTIVESICULAR_BODY_SORTING_PATHWAY	17	-0.369768	-1.28931	0.183633	0.358492	1	4120	tags=41%, list=27%, signal=56%
GOBP_REGULATION_OF_TELOMERE_CAPPING	GOBP_REGULATION_OF_TELOMERE_CAPPING	24	-0.377335	-1.2888	0.18797	0.358101	1	91	tags=8%, list=1%, signal=8%
GOBP_NEGATIVE_REGULATION_OF_PROTEASOMAL_PROTEIN_CATABOLIC_PROCESS	GOBP_NEGATIVE_REGULATION_OF_PROTEASOMAL_PROTEIN_CATABOLIC_PROCESS	39	-0.297382	-1.27998	0.138298	0.372694	1	2058	tags=15%, list=13%, signal=18%
GOBP_MRNA_EXPORT_FROM_NUCLEUS	GOBP_MRNA_EXPORT_FROM_NUCLEUS	52	-0.283816	-1.27929	0.210638	0.372648	1	5008	tags=52%, list=33%, signal=77%
GOBP_DNA_METHYLATION_INVOLVED_IN_GAMETE_GENERATION	GOBP_DNA_METHYLATION_INVOLVED_IN_GAMETE_GENERATION	20	-0.594247	-1.27904	0.155206	0.371807	1	2115	tags=45%, list=14%, signal=52%
GOBP_PROTEIN_TRANSMEMBRANE_TRANSPORT	GOBP_PROTEIN_TRANSMEMBRANE_TRANSPORT	56	-0.290382	-1.27065	0.173228	0.385573	1	3004	tags=36%, list=20%, signal=44%
GOBP_POSITIVE_REGULATION_OF_CYCLIN_DEPENDENT_PROTEIN_KINASE_ACTIVITY	GOBP_POSITIVE_REGULATION_OF_CYCLIN_DEPENDENT_PROTEIN_KINASE_ACTIVITY	32	-0.432253	-1.26635	0.168803	0.39227	1	1627	tags=28%, list=11%, signal=31%
GOBP_NUCLEIC_ACID_PHOSPHODIESTER_BOND_HYDROLYSIS	GOBP_NUCLEIC_ACID_PHOSPHODIESTER_BOND_HYDROLYSIS	224	-0.271742	-1.26536	0.146341	0.392791	1	3014	tags=33%, list=20%, signal=41%
GOBP_MITOCHONDRIAL_OUTER_MEMBRANE_PERMEABILIZATION	GOBP_MITOCHONDRIAL_OUTER_MEMBRANE_PERMEABILIZATION	28	-0.3556	-1.26357	0.166987	0.394558	1	3323	tags=29%, list=22%, signal=36%
GOBP_DNA_BIOSYNTHETIC_PROCESS	GOBP_DNA_BIOSYNTHETIC_PROCESS	174	-0.298701	-1.26344	0.194981	0.393444	1	2650	tags=27%, list=17%, signal=32%
GOBP_MRNA_MODIFICATION	GOBP_MRNA_MODIFICATION	24	-0.419978	-1.26296	0.236025	0.392996	1	4278	tags=54%, list=28%, signal=75%
GOBP_PROTEIN_HYDROXYLATION	GOBP_PROTEIN_HYDROXYLATION	19	-0.507513	-1.26145	0.233202	0.39446	1	2046	tags=37%, list=13%, signal=42%
GOBP_POSITIVE_REGULATION_OF_TELOMERE_CAPPING	GOBP_POSITIVE_REGULATION_OF_TELOMERE_CAPPING	15	-0.473965	-1.26123	0.199616	0.393529	1	91	tags=13%, list=1%, signal=13%
GOBP_POSITIVE_REGULATION_OF_DNA_REPLICATION	GOBP_POSITIVE_REGULATION_OF_DNA_REPLICATION	39	-0.454227	-1.26097	0.197154	0.392652	1	955	tags=21%, list=6%, signal=22%
GOBP_TRANSCRIPTION_PREINITIATION_COMPLEX_ASSEMBLY	GOBP_TRANSCRIPTION_PREINITIATION_COMPLEX_ASSEMBLY	38	-0.324252	-1.25518	0.223553	0.401924	1	4191	tags=42%, list=27%, signal=58%
GOBP_DNA_TEMPLATED_TRANSCRIPTION_INITIATION	GOBP_DNA_TEMPLATED_TRANSCRIPTION_INITIATION	104	-0.257192	-1.25422	0.175649	0.402354	1	4323	tags=38%, list=28%, signal=52%
GOBP_ESTABLISHMENT_OF_RNA_LOCALIZATION	GOBP_ESTABLISHMENT_OF_RNA_LOCALIZATION	137	-0.248655	-1.25381	0.215447	0.401806	1	4258	tags=39%, list=28%, signal=54%
GOBP_HISTONE_H3_K9_METHYLATION	GOBP_HISTONE_H3_K9_METHYLATION	38	-0.347028	-1.24967	0.190476	0.408239	1	1459	tags=18%, list=10%, signal=20%
GOBP_PROTEIN_LOCALIZATION_TO_CYTOSKELETON	GOBP_PROTEIN_LOCALIZATION_TO_CYTOSKELETON	52	-0.332109	-1.24921	0.221116	0.407743	1	1413	tags=13%, list=9%, signal=15%
GOBP_MALE_MEIOTIC_NUCLEAR_DIVISION	GOBP_MALE_MEIOTIC_NUCLEAR_DIVISION	42	-0.509323	-1.24795	0.173077	0.408761	1	2115	tags=36%, list=14%, signal=41%
GOBP_NON_MEMBRANE_BOUNDED_ORGANELLE_ASSEMBLY	GOBP_NON_MEMBRANE_BOUNDED_ORGANELLE_ASSEMBLY	339	-0.297215	-1.24634	0.208661	0.410394	1	1675	tags=19%, list=11%, signal=21%
GOBP_MRNA_TRANSPORT	GOBP_MRNA_TRANSPORT	105	-0.272259	-1.24601	0.226415	0.409603	1	3715	tags=33%, list=24%, signal=44%
GOBP_POSITIVE_REGULATION_OF_CYTOKINESIS	GOBP_POSITIVE_REGULATION_OF_CYTOKINESIS	37	-0.436568	-1.2444	0.217213	0.411202	1	1413	tags=22%, list=9%, signal=24%
GOBP_NUCLEOSOME_ORGANIZATION	GOBP_NUCLEOSOME_ORGANIZATION	94	-0.2886	-1.23837	0.201258	0.421313	1	1937	tags=18%, list=13%, signal=21%
GOBP_MISMATCH_REPAIR	GOBP_MISMATCH_REPAIR	27	-0.357336	-1.23781	0.22549	0.421044	1	2317	tags=26%, list=15%, signal=30%
GOBP_REGULATION_OF_CELL_AGING	GOBP_REGULATION_OF_CELL_AGING	42	-0.371336	-1.23596	0.212237	0.423142	1	1744	tags=26%, list=11%, signal=29%
GOBP_SYNAPTONEMAL_COMPLEX_ORGANIZATION	GOBP_SYNAPTONEMAL_COMPLEX_ORGANIZATION	21	-0.552243	-1.23184	0.203557	0.429648	1	2534	tags=48%, list=17%, signal=57%
GOBP_NEGATIVE_REGULATION_OF_HISTONE_METHYLATION	GOBP_NEGATIVE_REGULATION_OF_HISTONE_METHYLATION	20	-0.393259	-1.23022	0.268293	0.431425	1	1461	tags=15%, list=10%, signal=17%
GOBP_MITOCHONDRIAL_GENOME_MAINTENANCE	GOBP_MITOCHONDRIAL_GENOME_MAINTENANCE	21	-0.418828	-1.22959	0.203252	0.431259	1	2941	tags=43%, list=19%, signal=53%
GOBP_POSITIVE_REGULATION_OF_MEIOTIC_CELL_CYCLE	GOBP_POSITIVE_REGULATION_OF_MEIOTIC_CELL_CYCLE	22	-0.515849	-1.22803	0.187625	0.432928	1	1858	tags=32%, list=12%, signal=36%
GOBP_NEGATIVE_REGULATION_OF_CELL_CYCLE	GOBP_NEGATIVE_REGULATION_OF_CELL_CYCLE	321	-0.321856	-1.22657	0.214141	0.434352	1	1858	tags=23%, list=12%, signal=25%
GOBP_POSITIVE_REGULATION_OF_HISTONE_H3_K4_METHYLATION	GOBP_POSITIVE_REGULATION_OF_HISTONE_H3_K4_METHYLATION	22	-0.387998	-1.22574	0.258134	0.434574	1	1851	tags=18%, list=12%, signal=21%
GOBP_DOSAGE_COMPENSATION	GOBP_DOSAGE_COMPENSATION	18	-0.36104	-1.22256	0.25	0.439244	1	9820	tags=100%, list=64%, signal=277%
GOBP_DNA_METHYLATION	GOBP_DNA_METHYLATION	65	-0.410365	-1.22254	0.179134	0.437908	1	2287	tags=34%, list=15%, signal=40%
GOBP_REGULATION_OF_TRANSLATIONAL_INITIATION	GOBP_REGULATION_OF_TRANSLATIONAL_INITIATION	73	-0.234666	-1.22241	0.235409	0.436784	1	3529	tags=34%, list=23%, signal=44%
GOBP_EXIT_FROM_MITOSIS	GOBP_EXIT_FROM_MITOSIS	29	-0.392055	-1.2221	0.26749	0.435967	1	338	tags=14%, list=2%, signal=14%
GOBP_DNA_SYNTHESIS_INVOLVED_IN_DNA_REPAIR	GOBP_DNA_SYNTHESIS_INVOLVED_IN_DNA_REPAIR	32	-0.373707	-1.22145	0.225806	0.43575	1	1883	tags=25%, list=12%, signal=28%
GOBP_FOLIC_ACID_CONTAINING_COMPOUND_METABOLIC_PROCESS	GOBP_FOLIC_ACID_CONTAINING_COMPOUND_METABOLIC_PROCESS	26	-0.423837	-1.21499	0.219067	0.447101	1	3359	tags=58%, list=22%, signal=74%
GOBP_NEGATIVE_REGULATION_OF_UBIQUITIN_DEPENDENT_PROTEIN_CATABOLIC_PROCESS	GOBP_NEGATIVE_REGULATION_OF_UBIQUITIN_DEPENDENT_PROTEIN_CATABOLIC_PROCESS	42	-0.269245	-1.21376	0.214	0.44818	1	2058	tags=12%, list=13%, signal=14%
GOBP_RESPIRATORY_ELECTRON_TRANSPORT_CHAIN	GOBP_RESPIRATORY_ELECTRON_TRANSPORT_CHAIN	87	-0.29114	-1.21143	0.255952	0.451429	1	4721	tags=51%, list=31%, signal=73%
GOBP_PYRIMIDINE_NUCLEOSIDE_TRIPHOSPHATE_METABOLIC_PROCESS	GOBP_PYRIMIDINE_NUCLEOSIDE_TRIPHOSPHATE_METABOLIC_PROCESS	21	-0.372395	-1.21067	0.242308	0.451545	1	4099	tags=62%, list=27%, signal=84%
GOBP_COLLECTING_DUCT_DEVELOPMENT	GOBP_COLLECTING_DUCT_DEVELOPMENT	15	-0.513477	-1.20993	0.192067	0.45152	1	857	tags=27%, list=6%, signal=28%
GOBP_INNER_EAR_RECEPTOR_CELL_STEREOCILIUM_ORGANIZATION	GOBP_INNER_EAR_RECEPTOR_CELL_STEREOCILIUM_ORGANIZATION	26	-0.408017	-1.20959	0.242171	0.450791	1	3734	tags=46%, list=24%, signal=61%
GOBP_TRANSCRIPTION_ELONGATION_FROM_RNA_POLYMERASE_II_PROMOTER	GOBP_TRANSCRIPTION_ELONGATION_FROM_RNA_POLYMERASE_II_PROMOTER	52	-0.247661	-1.20791	0.234592	0.452686	1	4229	tags=37%, list=28%, signal=50%
GOBP_PROTEIN_LOCALIZATION_TO_CHROMATIN	GOBP_PROTEIN_LOCALIZATION_TO_CHROMATIN	25	-0.413525	-1.20419	0.3125	0.458658	1	414	tags=20%, list=3%, signal=21%
GOBP_TRANSLESION_SYNTHESIS	GOBP_TRANSLESION_SYNTHESIS	20	-0.377338	-1.20276	0.271457	0.459928	1	1883	tags=25%, list=12%, signal=28%
GOBP_NUCLEAR_TRANSCRIBED_MRNA_CATABOLIC_PROCESS_EXONUCLEOLYTIC	GOBP_NUCLEAR_TRANSCRIBED_MRNA_CATABOLIC_PROCESS_EXONUCLEOLYTIC	18	-0.368292	-1.20009	0.282051	0.463811	1	4163	tags=39%, list=27%, signal=53%
GOBP_N_TERMINAL_PROTEIN_AMINO_ACID_ACETYLATION	GOBP_N_TERMINAL_PROTEIN_AMINO_ACID_ACETYLATION	16	-0.390694	-1.19981	0.230769	0.462923	1	3553	tags=63%, list=23%, signal=81%
GOBP_AEROBIC_RESPIRATION	GOBP_AEROBIC_RESPIRATION	139	-0.251158	-1.19614	0.266798	0.468827	1	3431	tags=29%, list=22%, signal=38%
GOBP_NEGATIVE_REGULATION_OF_TELOMERE_MAINTENANCE_VIA_TELOMERASE	GOBP_NEGATIVE_REGULATION_OF_TELOMERE_MAINTENANCE_VIA_TELOMERASE	17	-0.350755	-1.19179	0.244856	0.476194	1	2327	tags=24%, list=15%, signal=28%
GOBP_REGULATION_OF_MITOCHONDRIAL_OUTER_MEMBRANE_PERMEABILIZATION_INVOLVED_IN_APOPTOTIC_SIGNALING_PATHWAY	GOBP_REGULATION_OF_MITOCHONDRIAL_OUTER_MEMBRANE_PERMEABILIZATION_INVOLVED_IN_APOPTOTIC_SIGNALING_PATHWAY	18	-0.381935	-1.18772	0.252408	0.482958	1	3323	tags=33%, list=22%, signal=42%
GOBP_NUCLEAR_TRANSCRIBED_MRNA_CATABOLIC_PROCESS	GOBP_NUCLEAR_TRANSCRIBED_MRNA_CATABOLIC_PROCESS	108	-0.214715	-1.18691	0.238477	0.483167	1	3605	tags=30%, list=23%, signal=38%
GOBP_POSITIVE_REGULATION_OF_TELOMERASE_ACTIVITY	GOBP_POSITIVE_REGULATION_OF_TELOMERASE_ACTIVITY	34	-0.349298	-1.18609	0.250965	0.483366	1	3448	tags=38%, list=22%, signal=49%
GOBP_SIGNAL_TRANSDUCTION_IN_RESPONSE_TO_DNA_DAMAGE	GOBP_SIGNAL_TRANSDUCTION_IN_RESPONSE_TO_DNA_DAMAGE	155	-0.318484	-1.17884	0.269777	0.49632	1	2774	tags=28%, list=18%, signal=34%
GOBP_REGULATION_OF_CYCLIN_DEPENDENT_PROTEIN_KINASE_ACTIVITY	GOBP_REGULATION_OF_CYCLIN_DEPENDENT_PROTEIN_KINASE_ACTIVITY	91	-0.354959	-1.17504	0.244939	0.502681	1	976	tags=22%, list=6%, signal=23%
GOBP_FACULTATIVE_HETEROCHROMATIN_ASSEMBLY	GOBP_FACULTATIVE_HETEROCHROMATIN_ASSEMBLY	29	-0.33519	-1.17352	0.256566	0.504277	1	2774	tags=34%, list=18%, signal=42%
GOBP_NEGATIVE_REGULATION_OF_MRNA_SPLICING_VIA_SPLICEOSOME	GOBP_NEGATIVE_REGULATION_OF_MRNA_SPLICING_VIA_SPLICEOSOME	19	-0.383609	-1.17063	0.293651	0.508816	1	4265	tags=37%, list=28%, signal=51%
GOBP_ATP_SYNTHESIS_COUPLED_ELECTRON_TRANSPORT	GOBP_ATP_SYNTHESIS_COUPLED_ELECTRON_TRANSPORT	70	-0.287695	-1.17062	0.327103	0.507345	1	4721	tags=49%, list=31%, signal=70%
GOBP_GPI_ANCHOR_METABOLIC_PROCESS	GOBP_GPI_ANCHOR_METABOLIC_PROCESS	28	-0.361783	-1.1683	0.294695	0.510685	1	3338	tags=46%, list=22%, signal=59%
GOBP_POSITIVE_REGULATION_OF_RNA_SPLICING	GOBP_POSITIVE_REGULATION_OF_RNA_SPLICING	33	-0.343637	-1.16826	0.26294	0.509286	1	3101	tags=30%, list=20%, signal=38%
GOBP_REGULATION_OF_TELOMERASE_ACTIVITY	GOBP_REGULATION_OF_TELOMERASE_ACTIVITY	47	-0.303368	-1.1671	0.266798	0.510186	1	3448	tags=36%, list=22%, signal=46%
GOBP_MALE_MEIOSIS_I	GOBP_MALE_MEIOSIS_I	24	-0.490083	-1.16639	0.250988	0.510122	1	2527	tags=33%, list=16%, signal=40%
GOBP_PROTEIN_REFOLDING	GOBP_PROTEIN_REFOLDING	18	-0.361158	-1.15935	0.260081	0.523233	1	3980	tags=39%, list=26%, signal=52%
GOBP_MICROTUBULE_NUCLEATION	GOBP_MICROTUBULE_NUCLEATION	33	-0.303828	-1.15766	0.276342	0.52534	1	2476	tags=21%, list=16%, signal=25%
GOBP_METHYLATION	GOBP_METHYLATION	295	-0.241428	-1.15619	0.210526	0.526902	1	2914	tags=24%, list=19%, signal=29%
GOBP_NUCLEOBASE_METABOLIC_PROCESS	GOBP_NUCLEOBASE_METABOLIC_PROCESS	36	-0.37241	-1.15592	0.262745	0.525988	1	2774	tags=44%, list=18%, signal=54%
GOBP_ESTABLISHMENT_OF_MITOTIC_SPINDLE_LOCALIZATION	GOBP_ESTABLISHMENT_OF_MITOTIC_SPINDLE_LOCALIZATION	32	-0.404851	-1.15559	0.278557	0.52521	1	1823	tags=25%, list=12%, signal=28%
GOBP_PTERIDINE_CONTAINING_COMPOUND_METABOLIC_PROCESS	GOBP_PTERIDINE_CONTAINING_COMPOUND_METABOLIC_PROCESS	33	-0.364851	-1.15542	0.268102	0.524089	1	3359	tags=48%, list=22%, signal=62%
GOBP_NEGATIVE_REGULATION_OF_CELL_AGING	GOBP_NEGATIVE_REGULATION_OF_CELL_AGING	22	-0.457948	-1.15343	0.264529	0.526818	1	1744	tags=32%, list=11%, signal=36%
GOBP_QUINONE_METABOLIC_PROCESS	GOBP_QUINONE_METABOLIC_PROCESS	36	-0.4682	-1.15304	0.328629	0.526049	1	2288	tags=39%, list=15%, signal=46%
GOBP_REPLICATIVE_SENESCENCE	GOBP_REPLICATIVE_SENESCENCE	16	-0.507632	-1.14702	0.300578	0.537483	1	1526	tags=31%, list=10%, signal=35%
GOBP_VIRION_ASSEMBLY	GOBP_VIRION_ASSEMBLY	32	-0.300642	-1.14668	0.3083	0.536674	1	4120	tags=41%, list=27%, signal=55%
GOBP_DNA_TEMPLATED_TRANSCRIPTION_TERMINATION	GOBP_DNA_TEMPLATED_TRANSCRIPTION_TERMINATION	15	-0.354986	-1.14653	0.294355	0.535467	1	3319	tags=27%, list=22%, signal=34%
GOBP_PROTEIN_METHYLATION	GOBP_PROTEIN_METHYLATION	159	-0.239076	-1.14483	0.25102	0.537637	1	3195	tags=24%, list=21%, signal=30%
GOBP_REGULATION_OF_RESPONSE_TO_DNA_DAMAGE_STIMULUS	GOBP_REGULATION_OF_RESPONSE_TO_DNA_DAMAGE_STIMULUS	207	-0.265218	-1.1443	0.264706	0.537258	1	3192	tags=27%, list=21%, signal=34%
GOBP_PROTEIN_FOLDING	GOBP_PROTEIN_FOLDING	178	-0.217715	-1.14392	0.256214	0.536538	1	4076	tags=40%, list=27%, signal=54%
GOBP_TELOMERE_CAPPING	GOBP_TELOMERE_CAPPING	35	-0.292416	-1.14057	0.302682	0.542059	1	91	tags=6%, list=1%, signal=6%
GOBP_INOSITOL_PHOSPHATE_CATABOLIC_PROCESS	GOBP_INOSITOL_PHOSPHATE_CATABOLIC_PROCESS	17	-0.417902	-1.13416	0.312369	0.55433	1	2266	tags=41%, list=15%, signal=48%
GOBP_HISTONE_PHOSPHORYLATION	GOBP_HISTONE_PHOSPHORYLATION	41	-0.406122	-1.13217	0.310204	0.557188	1	367	tags=15%, list=2%, signal=15%
GOBP_GANGLION_DEVELOPMENT	GOBP_GANGLION_DEVELOPMENT	17	-0.53749	-1.13141	0.29918	0.557281	1	2128	tags=47%, list=14%, signal=55%
GOBP_GLUTAMINE_FAMILY_AMINO_ACID_METABOLIC_PROCESS	GOBP_GLUTAMINE_FAMILY_AMINO_ACID_METABOLIC_PROCESS	69	-0.379787	-1.13087	0.25641	0.556904	1	2695	tags=41%, list=18%, signal=49%
GOBP_PORPHYRIN_CONTAINING_COMPOUND_METABOLIC_PROCESS	GOBP_PORPHYRIN_CONTAINING_COMPOUND_METABOLIC_PROCESS	48	-0.341185	-1.13024	0.314583	0.556733	1	3250	tags=38%, list=21%, signal=47%
GOBP_PROTEIN_HETEROOLIGOMERIZATION	GOBP_PROTEIN_HETEROOLIGOMERIZATION	26	-0.375421	-1.13013	0.318471	0.55544	1	1882	tags=19%, list=12%, signal=22%
GOBP_PYRIMIDINE_CONTAINING_COMPOUND_BIOSYNTHETIC_PROCESS	GOBP_PYRIMIDINE_CONTAINING_COMPOUND_BIOSYNTHETIC_PROCESS	32	-0.345801	-1.12863	0.303823	0.557233	1	2050	tags=31%, list=13%, signal=36%
GOBP_TYROSINE_METABOLIC_PROCESS	GOBP_TYROSINE_METABOLIC_PROCESS	15	-0.52808	-1.12735	0.327309	0.558407	1	952	tags=20%, list=6%, signal=21%
GOBP_REGULATION_OF_MITOCHONDRIAL_MEMBRANE_PERMEABILITY	GOBP_REGULATION_OF_MITOCHONDRIAL_MEMBRANE_PERMEABILITY	50	-0.274139	-1.12719	0.29222	0.557231	1	3573	tags=34%, list=23%, signal=44%
GOBP_PROTEIN_MONOUBIQUITINATION	GOBP_PROTEIN_MONOUBIQUITINATION	68	-0.266384	-1.12625	0.337325	0.557767	1	3572	tags=31%, list=23%, signal=40%
GOBP_PEPTIDYL_ASPARAGINE_MODIFICATION	GOBP_PEPTIDYL_ASPARAGINE_MODIFICATION	24	-0.371038	-1.12305	0.342857	0.563073	1	4906	tags=58%, list=32%, signal=86%
GOBP_PROTEIN_MODIFICATION_BY_SMALL_PROTEIN_REMOVAL	GOBP_PROTEIN_MODIFICATION_BY_SMALL_PROTEIN_REMOVAL	132	-0.218477	-1.12211	0.315789	0.563528	1	3948	tags=34%, list=26%, signal=45%
GOBP_RIBOSOMAL_SMALL_SUBUNIT_ASSEMBLY	GOBP_RIBOSOMAL_SMALL_SUBUNIT_ASSEMBLY	17	-0.352782	-1.11505	0.325253	0.577349	1	5100	tags=47%, list=33%, signal=70%
GOBP_TRICARBOXYLIC_ACID_CYCLE	GOBP_TRICARBOXYLIC_ACID_CYCLE	30	-0.320366	-1.11421	0.36345	0.577671	1	5113	tags=53%, list=33%, signal=80%
GOBP_POSITIVE_REGULATION_OF_DNA_BIOSYNTHETIC_PROCESS	GOBP_POSITIVE_REGULATION_OF_DNA_BIOSYNTHETIC_PROCESS	72	-0.310959	-1.11419	0.313093	0.57617	1	2590	tags=35%, list=17%, signal=42%
GOBP_PEPTIDYL_PROLINE_MODIFICATION	GOBP_PEPTIDYL_PROLINE_MODIFICATION	43	-0.298828	-1.11152	0.306238	0.580461	1	2359	tags=26%, list=15%, signal=30%
GOBP_DNA_RECOMBINATION	GOBP_DNA_RECOMBINATION	256	-0.311822	-1.11144	0.34638	0.579067	1	3217	tags=36%, list=21%, signal=44%
GOBP_DNA_MODIFICATION	GOBP_DNA_MODIFICATION	108	-0.322106	-1.11084	0.292157	0.578809	1	2115	tags=31%, list=14%, signal=35%
GOBP_OXIDATIVE_PHOSPHORYLATION	GOBP_OXIDATIVE_PHOSPHORYLATION	96	-0.261297	-1.11084	0.312741	0.57728	1	3431	tags=32%, list=22%, signal=41%
GOBP_VIRAL_TRANSLATION	GOBP_VIRAL_TRANSLATION	17	-0.328553	-1.11063	0.303502	0.576202	1	10318	tags=100%, list=67%, signal=304%
GOBP_REGULATION_OF_SIGNAL_TRANSDUCTION_BY_P53_CLASS_MEDIATOR	GOBP_REGULATION_OF_SIGNAL_TRANSDUCTION_BY_P53_CLASS_MEDIATOR	90	-0.286693	-1.11015	0.315068	0.575746	1	1983	tags=20%, list=13%, signal=23%
[truncated: 423 more rows]
