# Supplementary material for: Combining autophagy and immune characterizations to predict prognosis and therapeutic response in lung adenocarcinoma
Source: Front Immunol. 2022 Sep 13;13:944378. doi: 10.3389/fimmu.2022.944378 (PMC9513242; doi:10.3389/fimmu.2022.944378)
Supplement: Supplementary file 11 [file Table_4.xlsx]

## Sheet: gsea_report_for_ImmCluster A
NAME	GS<br> follow link to MSigDB	SIZE	ES	NES	NOM p-val	FDR q-val	FWER p-val	RANK AT MAX	LEADING EDGE	Column1
HALLMARK_INFLAMMATORY_RESPONSE	HALLMARK_INFLAMMATORY_RESPONSE	196	0.668974	1.77122	0	0.305377	0.143	3460	tags=63%, list=23%, signal=81%
HALLMARK_IL6_JAK_STAT3_SIGNALING	HALLMARK_IL6_JAK_STAT3_SIGNALING	87	0.66739	1.74092	0.00197628	0.200991	0.175	3276	tags=61%, list=21%, signal=77%
HALLMARK_COMPLEMENT	HALLMARK_COMPLEMENT	191	0.547502	1.72067	0.0020284	0.155363	0.2	4009	tags=51%, list=26%, signal=68%
HALLMARK_IL2_STAT5_SIGNALING	HALLMARK_IL2_STAT5_SIGNALING	193	0.525157	1.69988	0.00801603	0.13568	0.232	3479	tags=50%, list=23%, signal=64%
HALLMARK_UV_RESPONSE_DN	HALLMARK_UV_RESPONSE_DN	136	0.490081	1.67521	0.0102459	0.131256	0.27	4780	tags=55%, list=31%, signal=79%
HALLMARK_INTERFERON_GAMMA_RESPONSE	HALLMARK_INTERFERON_GAMMA_RESPONSE	192	0.617465	1.67019	0.034	0.113042	0.274	3734	tags=60%, list=24%, signal=79%
HALLMARK_KRAS_SIGNALING_UP	HALLMARK_KRAS_SIGNALING_UP	191	0.553534	1.66771	0.00394477	0.0996333	0.28	4032	tags=59%, list=26%, signal=79%
HALLMARK_APOPTOSIS	HALLMARK_APOPTOSIS	156	0.466996	1.66632	0.0188679	0.0877262	0.282	4757	tags=49%, list=31%, signal=70%
HALLMARK_ALLOGRAFT_REJECTION	HALLMARK_ALLOGRAFT_REJECTION	191	0.673553	1.65855	0.0219124	0.0814094	0.291	3144	tags=62%, list=20%, signal=77%
HALLMARK_TGF_BETA_SIGNALING	HALLMARK_TGF_BETA_SIGNALING	54	0.474834	1.62407	0.0534979	0.0912273	0.333	3977	tags=33%, list=26%, signal=45%
HALLMARK_MYOGENESIS	HALLMARK_MYOGENESIS	196	0.540959	1.59823	0.0120724	0.0998363	0.373	2538	tags=35%, list=17%, signal=42%
HALLMARK_APICAL_JUNCTION	HALLMARK_APICAL_JUNCTION	191	0.469642	1.57432	0.0147679	0.105334	0.406	4455	tags=42%, list=29%, signal=59%
HALLMARK_P53_PATHWAY	HALLMARK_P53_PATHWAY	187	0.40139	1.56191	0.0238095	0.105652	0.427	3888	tags=39%, list=25%, signal=51%
HALLMARK_TNFA_SIGNALING_VIA_NFKB	HALLMARK_TNFA_SIGNALING_VIA_NFKB	192	0.586821	1.56131	0.0587002	0.0985282	0.428	4710	tags=66%, list=31%, signal=94%
HALLMARK_INTERFERON_ALPHA_RESPONSE	HALLMARK_INTERFERON_ALPHA_RESPONSE	92	0.614371	1.55145	0.083499	0.0979074	0.458	3994	tags=61%, list=26%, signal=82%
HALLMARK_ADIPOGENESIS	HALLMARK_ADIPOGENESIS	185	0.344359	1.52321	0.0648855	0.109268	0.51	2328	tags=14%, list=15%, signal=16%
HALLMARK_COAGULATION	HALLMARK_COAGULATION	135	0.494041	1.48192	0.0180361	0.130556	0.58	3333	tags=43%, list=22%, signal=54%
HALLMARK_NOTCH_SIGNALING	HALLMARK_NOTCH_SIGNALING	32	0.459789	1.45993	0.0876827	0.137374	0.617	4889	tags=44%, list=32%, signal=64%
HALLMARK_HEME_METABOLISM	HALLMARK_HEME_METABOLISM	188	0.340198	1.45339	0.0212355	0.134311	0.621	4824	tags=39%, list=31%, signal=57%
HALLMARK_HEDGEHOG_SIGNALING	HALLMARK_HEDGEHOG_SIGNALING	35	0.516427	1.42942	0.0658174	0.147848	0.655	4179	tags=43%, list=27%, signal=59%
HALLMARK_BILE_ACID_METABOLISM	HALLMARK_BILE_ACID_METABOLISM	112	0.454868	1.42817	0.0322581	0.141524	0.656	4110	tags=42%, list=27%, signal=57%
HALLMARK_APICAL_SURFACE	HALLMARK_APICAL_SURFACE	43	0.493966	1.41385	0.0564516	0.145804	0.677	3741	tags=47%, list=24%, signal=61%
HALLMARK_ANGIOGENESIS	HALLMARK_ANGIOGENESIS	36	0.497223	1.38906	0.112205	0.159001	0.722	4906	tags=56%, list=32%, signal=81%
HALLMARK_EPITHELIAL_MESENCHYMAL_TRANSITION	HALLMARK_EPITHELIAL_MESENCHYMAL_TRANSITION	193	0.466566	1.17757	0.3125	0.37043	0.904	4034	tags=45%, list=26%, signal=60%
HALLMARK_XENOBIOTIC_METABOLISM	HALLMARK_XENOBIOTIC_METABOLISM	193	0.355632	1.15166	0.236686	0.392326	0.917	3981	tags=35%, list=26%, signal=47%
HALLMARK_UV_RESPONSE_UP	HALLMARK_UV_RESPONSE_UP	151	0.296797	1.13623	0.249501	0.396895	0.926	2236	tags=17%, list=15%, signal=20%
HALLMARK_KRAS_SIGNALING_DN	HALLMARK_KRAS_SIGNALING_DN	184	0.364218	1.09327	0.254032	0.440824	0.942	3521	tags=33%, list=23%, signal=42%
HALLMARK_ESTROGEN_RESPONSE_EARLY	HALLMARK_ESTROGEN_RESPONSE_EARLY	192	0.308605	1.08086	0.327345	0.44116	0.948	3964	tags=31%, list=26%, signal=41%
HALLMARK_ANDROGEN_RESPONSE	HALLMARK_ANDROGEN_RESPONSE	95	0.273498	1.07278	0.340426	0.436794	0.951	4930	tags=36%, list=32%, signal=52%
HALLMARK_PI3K_AKT_MTOR_SIGNALING	HALLMARK_PI3K_AKT_MTOR_SIGNALING	103	0.236636	1.03837	0.386774	0.470117	0.966	3203	tags=17%, list=21%, signal=22%
HALLMARK_REACTIVE_OXYGEN_SPECIES_PATHWAY	HALLMARK_REACTIVE_OXYGEN_SPECIES_PATHWAY	44	0.273243	0.953551	0.494208	0.580142	0.984	2822	tags=20%, list=18%, signal=25%
HALLMARK_FATTY_ACID_METABOLISM	HALLMARK_FATTY_ACID_METABOLISM	150	0.250582	0.938708	0.533333	0.588589	0.987	2173	tags=12%, list=14%, signal=14%
HALLMARK_WNT_BETA_CATENIN_SIGNALING	HALLMARK_WNT_BETA_CATENIN_SIGNALING	41	0.275768	0.915381	0.588486	0.60732	0.991	5125	tags=37%, list=33%, signal=55%
HALLMARK_CHOLESTEROL_HOMEOSTASIS	HALLMARK_CHOLESTEROL_HOMEOSTASIS	69	0.250015	0.908778	0.579882	0.600185	0.991	4691	tags=32%, list=31%, signal=46%
HALLMARK_PROTEIN_SECRETION	HALLMARK_PROTEIN_SECRETION	95	0.176249	0.907169	0.531915	0.585462	0.991	4907	tags=27%, list=32%, signal=40%
HALLMARK_ESTROGEN_RESPONSE_LATE	HALLMARK_ESTROGEN_RESPONSE_LATE	191	0.265018	0.883747	0.690662	0.6049	0.992	3259	tags=26%, list=21%, signal=32%
HALLMARK_PEROXISOME	HALLMARK_PEROXISOME	102	0.221348	0.869503	0.656189	0.60958	0.992	4313	tags=27%, list=28%, signal=38%
HALLMARK_HYPOXIA	HALLMARK_HYPOXIA	190	0.236153	0.841181	0.682474	0.634328	0.992	3471	tags=27%, list=23%, signal=34%
GOBP_REGULATION_OF_VACUOLE_ORGANIZATION	GOBP_REGULATION_OF_VACUOLE_ORGANIZATION	48	0.434668	1.9334	0.00204082	1	0.43	2846	tags=23%, list=19%, signal=28%
GOBP_AUTOPHAGOSOME_ORGANIZATION	GOBP_AUTOPHAGOSOME_ORGANIZATION	95	0.35642	1.91196	0.00590551	1	0.488	4584	tags=24%, list=30%, signal=34%
GOBP_NEGATIVE_REGULATION_OF_ATP_METABOLIC_PROCESS	GOBP_NEGATIVE_REGULATION_OF_ATP_METABOLIC_PROCESS	26	0.608643	1.90556	0	1	0.512	1978	tags=23%, list=13%, signal=26%
GOBP_IMMUNE_RESPONSE_REGULATING_SIGNALING_PATHWAY	GOBP_IMMUNE_RESPONSE_REGULATING_SIGNALING_PATHWAY	360	0.644677	1.90343	0.00396825	0.872122	0.515	3109	tags=48%, list=20%, signal=59%
GOBP_FC_RECEPTOR_SIGNALING_PATHWAY	GOBP_FC_RECEPTOR_SIGNALING_PATHWAY	49	0.679321	1.90059	0	0.711566	0.52	2945	tags=49%, list=19%, signal=60%
GOBP_VASCULAR_ENDOTHELIAL_CELL_PROLIFERATION	GOBP_VASCULAR_ENDOTHELIAL_CELL_PROLIFERATION	20	0.741884	1.8843	0	0.706142	0.581	2335	tags=40%, list=15%, signal=47%
GOBP_POSITIVE_REGULATION_OF_EPITHELIAL_CELL_MIGRATION	GOBP_POSITIVE_REGULATION_OF_EPITHELIAL_CELL_MIGRATION	137	0.555039	1.88051	0	0.628047	0.595	3409	tags=42%, list=22%, signal=53%
GOBP_NEGATIVE_REGULATION_OF_IMMUNE_RESPONSE	GOBP_NEGATIVE_REGULATION_OF_IMMUNE_RESPONSE	161	0.615891	1.87704	0.00199203	0.570423	0.601	3160	tags=46%, list=21%, signal=57%
GOBP_REGULATION_OF_RESPONSE_TO_CYTOKINE_STIMULUS	GOBP_REGULATION_OF_RESPONSE_TO_CYTOKINE_STIMULUS	142	0.539669	1.87498	0.00206186	0.518922	0.605	2966	tags=33%, list=19%, signal=41%
GOBP_ACTIVATION_OF_IMMUNE_RESPONSE	GOBP_ACTIVATION_OF_IMMUNE_RESPONSE	278	0.65807	1.86762	0.00200401	0.501606	0.635	3160	tags=50%, list=21%, signal=62%
GOBP_REGULATION_OF_GTPASE_ACTIVITY	GOBP_REGULATION_OF_GTPASE_ACTIVITY	323	0.484687	1.86694	0	0.459477	0.637	4215	tags=46%, list=27%, signal=61%
GOBP_REGULATION_OF_NIK_NF_KAPPAB_SIGNALING	GOBP_REGULATION_OF_NIK_NF_KAPPAB_SIGNALING	91	0.616951	1.86679	0	0.421653	0.637	2788	tags=41%, list=18%, signal=49%
GOBP_POSITIVE_REGULATION_OF_CHEMOKINE_PRODUCTION	GOBP_POSITIVE_REGULATION_OF_CHEMOKINE_PRODUCTION	66	0.690515	1.86585	0	0.393282	0.639	3098	tags=58%, list=20%, signal=72%
GOBP_CALCINEURIN_MEDIATED_SIGNALING	GOBP_CALCINEURIN_MEDIATED_SIGNALING	43	0.646083	1.86487	0	0.36919	0.643	3403	tags=47%, list=22%, signal=60%
GOBP_NEGATIVE_REGULATION_OF_OXIDOREDUCTASE_ACTIVITY	GOBP_NEGATIVE_REGULATION_OF_OXIDOREDUCTASE_ACTIVITY	22	0.742034	1.86481	0	0.34504	0.643	1774	tags=41%, list=12%, signal=46%
GOBP_CHEMOKINE_PRODUCTION	GOBP_CHEMOKINE_PRODUCTION	88	0.672459	1.86238	0	0.331477	0.651	3098	tags=55%, list=20%, signal=68%
GOBP_I_KAPPAB_KINASE_NF_KAPPAB_SIGNALING	GOBP_I_KAPPAB_KINASE_NF_KAPPAB_SIGNALING	258	0.502775	1.8623	0	0.312049	0.651	4140	tags=40%, list=27%, signal=54%
GOBP_POSITIVE_REGULATION_OF_GTPASE_ACTIVITY	GOBP_POSITIVE_REGULATION_OF_GTPASE_ACTIVITY	237	0.500121	1.86027	0	0.300664	0.661	4215	tags=49%, list=27%, signal=66%
GOBP_CALCIUM_MEDIATED_SIGNALING	GOBP_CALCIUM_MEDIATED_SIGNALING	181	0.656404	1.8594	0	0.287119	0.662	3057	tags=49%, list=20%, signal=61%
GOBP_PATTERN_RECOGNITION_RECEPTOR_SIGNALING_PATHWAY	GOBP_PATTERN_RECOGNITION_RECEPTOR_SIGNALING_PATHWAY	156	0.587891	1.85817	0.00407332	0.274917	0.663	4135	tags=51%, list=27%, signal=69%
GOBP_REGULATION_OF_ENDOTHELIAL_CELL_MIGRATION	GOBP_REGULATION_OF_ENDOTHELIAL_CELL_MIGRATION	155	0.563774	1.85687	0	0.265178	0.67	3409	tags=44%, list=22%, signal=56%
GOBP_CYTOPLASMIC_PATTERN_RECOGNITION_RECEPTOR_SIGNALING_PATHWAY	GOBP_CYTOPLASMIC_PATTERN_RECOGNITION_RECEPTOR_SIGNALING_PATHWAY	50	0.551619	1.85486	0.00809717	0.258136	0.677	2323	tags=30%, list=15%, signal=35%
GOBP_INOSITOL_PHOSPHATE_MEDIATED_SIGNALING	GOBP_INOSITOL_PHOSPHATE_MEDIATED_SIGNALING	53	0.644145	1.85358	0	0.250551	0.681	3403	tags=51%, list=22%, signal=65%
GOBP_REGULATION_OF_CALCIUM_MEDIATED_SIGNALING	GOBP_REGULATION_OF_CALCIUM_MEDIATED_SIGNALING	68	0.685829	1.85161	0	0.24378	0.686	3403	tags=56%, list=22%, signal=71%
GOBP_NEGATIVE_REGULATION_OF_SMALL_GTPASE_MEDIATED_SIGNAL_TRANSDUCTION	GOBP_NEGATIVE_REGULATION_OF_SMALL_GTPASE_MEDIATED_SIGNAL_TRANSDUCTION	53	0.559287	1.85119	0	0.23477	0.688	3308	tags=43%, list=22%, signal=55%
GOBP_NEGATIVE_REGULATION_OF_RESPONSE_TO_BIOTIC_STIMULUS	GOBP_NEGATIVE_REGULATION_OF_RESPONSE_TO_BIOTIC_STIMULUS	98	0.567625	1.85026	0.00205761	0.227638	0.69	4482	tags=52%, list=29%, signal=73%
GOBP_TUMOR_NECROSIS_FACTOR_SUPERFAMILY_CYTOKINE_PRODUCTION	GOBP_TUMOR_NECROSIS_FACTOR_SUPERFAMILY_CYTOKINE_PRODUCTION	155	0.66908	1.84976	0	0.220825	0.694	2953	tags=54%, list=19%, signal=66%
GOBP_SELECTIVE_AUTOPHAGY	GOBP_SELECTIVE_AUTOPHAGY	68	0.375199	1.84959	0.00625	0.213203	0.695	5833	tags=37%, list=38%, signal=59%
GOBP_POSITIVE_REGULATION_OF_NF_KAPPAB_TRANSCRIPTION_FACTOR_ACTIVITY	GOBP_POSITIVE_REGULATION_OF_NF_KAPPAB_TRANSCRIPTION_FACTOR_ACTIVITY	144	0.562566	1.84747	0	0.209729	0.706	3136	tags=40%, list=20%, signal=50%
GOBP_NEGATIVE_REGULATION_OF_DEFENSE_RESPONSE	GOBP_NEGATIVE_REGULATION_OF_DEFENSE_RESPONSE	203	0.580407	1.84602	0	0.205046	0.711	2927	tags=40%, list=19%, signal=49%
GOBP_NIK_NF_KAPPAB_SIGNALING	GOBP_NIK_NF_KAPPAB_SIGNALING	117	0.565934	1.84072	0	0.209753	0.735	3109	tags=39%, list=20%, signal=49%
GOBP_POSITIVE_REGULATION_OF_CELL_ADHESION	GOBP_POSITIVE_REGULATION_OF_CELL_ADHESION	407	0.595933	1.83926	0	0.206725	0.743	3382	tags=50%, list=22%, signal=62%
GOBP_PHAGOCYTOSIS	GOBP_PHAGOCYTOSIS	216	0.596456	1.83771	0	0.203581	0.749	3320	tags=50%, list=22%, signal=63%
GOBP_NEGATIVE_REGULATION_OF_IMMUNE_EFFECTOR_PROCESS	GOBP_NEGATIVE_REGULATION_OF_IMMUNE_EFFECTOR_PROCESS	106	0.678511	1.83193	0.00204499	0.209809	0.765	3160	tags=58%, list=21%, signal=72%
GOBP_REGULATION_OF_SMALL_GTPASE_MEDIATED_SIGNAL_TRANSDUCTION	GOBP_REGULATION_OF_SMALL_GTPASE_MEDIATED_SIGNAL_TRANSDUCTION	284	0.481101	1.83067	0	0.206578	0.768	4236	tags=48%, list=28%, signal=65%
GOBP_SMALL_GTPASE_MEDIATED_SIGNAL_TRANSDUCTION	GOBP_SMALL_GTPASE_MEDIATED_SIGNAL_TRANSDUCTION	471	0.451041	1.8294	0	0.203092	0.771	4168	tags=42%, list=27%, signal=56%
GOBP_NEGATIVE_REGULATION_OF_AUTOPHAGY	GOBP_NEGATIVE_REGULATION_OF_AUTOPHAGY	79	0.470284	1.82934	0.00202429	0.197603	0.771	2293	tags=20%, list=15%, signal=24%
GOBP_REGULATION_OF_PROTEIN_TARGETING	GOBP_REGULATION_OF_PROTEIN_TARGETING	62	0.427584	1.8292	0.00414079	0.192591	0.771	3024	tags=21%, list=20%, signal=26%
GOBP_NEGATIVE_REGULATION_OF_ENDOTHELIAL_CELL_PROLIFERATION	GOBP_NEGATIVE_REGULATION_OF_ENDOTHELIAL_CELL_PROLIFERATION	36	0.693564	1.82725	0	0.190902	0.775	3174	tags=56%, list=21%, signal=70%
GOBP_REGULATION_OF_PHOSPHATASE_ACTIVITY	GOBP_REGULATION_OF_PHOSPHATASE_ACTIVITY	74	0.540942	1.8259	0.00203666	0.188842	0.782	3538	tags=39%, list=23%, signal=51%
GOBP_FC_EPSILON_RECEPTOR_SIGNALING_PATHWAY	GOBP_FC_EPSILON_RECEPTOR_SIGNALING_PATHWAY	24	0.713702	1.8248	0	0.186571	0.785	2945	tags=50%, list=19%, signal=62%
GOBP_REGULATION_OF_OXIDOREDUCTASE_ACTIVITY	GOBP_REGULATION_OF_OXIDOREDUCTASE_ACTIVITY	87	0.547211	1.82336	0	0.18455	0.791	2783	tags=33%, list=18%, signal=40%
GOBP_REGULATION_OF_CALCINEURIN_MEDIATED_SIGNALING	GOBP_REGULATION_OF_CALCINEURIN_MEDIATED_SIGNALING	34	0.673021	1.82283	0.00201613	0.18112	0.792	3403	tags=50%, list=22%, signal=64%
GOBP_POSITIVE_REGULATION_OF_ENDOTHELIAL_CELL_MIGRATION	GOBP_POSITIVE_REGULATION_OF_ENDOTHELIAL_CELL_MIGRATION	96	0.583644	1.82125	0	0.180361	0.801	3409	tags=43%, list=22%, signal=55%
GOBP_MEMBRANE_INVAGINATION	GOBP_MEMBRANE_INVAGINATION	68	0.577298	1.82084	0.00197628	0.176942	0.802	2913	tags=44%, list=19%, signal=54%
GOBP_POSITIVE_REGULATION_OF_CYTOKINE_PRODUCTION	GOBP_POSITIVE_REGULATION_OF_CYTOKINE_PRODUCTION	424	0.598268	1.81949	0	0.175243	0.805	2978	tags=44%, list=19%, signal=53%
GOBP_INTERLEUKIN_6_PRODUCTION	GOBP_INTERLEUKIN_6_PRODUCTION	135	0.665637	1.81777	0	0.175019	0.811	3098	tags=58%, list=20%, signal=72%
GOBP_REGULATION_OF_PATTERN_RECOGNITION_RECEPTOR_SIGNALING_PATHWAY	GOBP_REGULATION_OF_PATTERN_RECOGNITION_RECEPTOR_SIGNALING_PATHWAY	88	0.588295	1.81721	0.002	0.172149	0.812	3109	tags=41%, list=20%, signal=51%
GOBP_REGULATION_OF_EPITHELIAL_CELL_MIGRATION	GOBP_REGULATION_OF_EPITHELIAL_CELL_MIGRATION	213	0.521671	1.81713	0	0.168687	0.812	3409	tags=41%, list=22%, signal=52%
GOBP_REGULATION_OF_VASCULATURE_DEVELOPMENT	GOBP_REGULATION_OF_VASCULATURE_DEVELOPMENT	253	0.580277	1.81695	0	0.16568	0.813	3288	tags=46%, list=21%, signal=57%
GOBP_T_CELL_PROLIFERATION	GOBP_T_CELL_PROLIFERATION	187	0.649072	1.81664	0.0040568	0.16283	0.814	3374	tags=55%, list=22%, signal=70%
GOBP_RAS_PROTEIN_SIGNAL_TRANSDUCTION	GOBP_RAS_PROTEIN_SIGNAL_TRANSDUCTION	325	0.442506	1.81591	0	0.160816	0.815	3931	tags=39%, list=26%, signal=52%
GOBP_REGULATION_OF_INFLAMMATORY_RESPONSE	GOBP_REGULATION_OF_INFLAMMATORY_RESPONSE	321	0.607119	1.81408	0	0.160685	0.821	2953	tags=45%, list=19%, signal=55%
GOBP_POSITIVE_REGULATION_OF_IMMUNE_RESPONSE	GOBP_POSITIVE_REGULATION_OF_IMMUNE_RESPONSE	456	0.624054	1.81383	0.00411523	0.158058	0.822	3132	tags=47%, list=20%, signal=58%
GOBP_POSITIVE_REGULATION_OF_CALCIUM_MEDIATED_SIGNALING	GOBP_POSITIVE_REGULATION_OF_CALCIUM_MEDIATED_SIGNALING	31	0.717356	1.81382	0.00200401	0.155184	0.822	3403	tags=58%, list=22%, signal=74%
GOBP_TOLL_LIKE_RECEPTOR_3_SIGNALING_PATHWAY	GOBP_TOLL_LIKE_RECEPTOR_3_SIGNALING_PATHWAY	19	0.72534	1.81287	0	0.153805	0.822	1507	tags=42%, list=10%, signal=47%
GOBP_REGULATION_OF_PROTEIN_DEPHOSPHORYLATION	GOBP_REGULATION_OF_PROTEIN_DEPHOSPHORYLATION	81	0.470219	1.81276	0	0.151273	0.822	3538	tags=32%, list=23%, signal=41%
GOBP_TOLL_LIKE_RECEPTOR_SIGNALING_PATHWAY	GOBP_TOLL_LIKE_RECEPTOR_SIGNALING_PATHWAY	112	0.613578	1.81265	0.00204499	0.14874	0.822	3109	tags=45%, list=20%, signal=56%
GOBP_POSITIVE_REGULATION_OF_I_KAPPAB_KINASE_NF_KAPPAB_SIGNALING	GOBP_POSITIVE_REGULATION_OF_I_KAPPAB_KINASE_NF_KAPPAB_SIGNALING	173	0.484211	1.81213	0.00198413	0.147406	0.825	4140	tags=40%, list=27%, signal=55%
GOBP_IMMUNE_RESPONSE_REGULATING_CELL_SURFACE_RECEPTOR_SIGNALING_PATHWAY	GOBP_IMMUNE_RESPONSE_REGULATING_CELL_SURFACE_RECEPTOR_SIGNALING_PATHWAY	225	0.680201	1.80824	0.00813008	0.150767	0.833	2605	tags=48%, list=17%, signal=57%
GOBP_NUCLEOTIDE_BINDING_DOMAIN_LEUCINE_RICH_REPEAT_CONTAINING_RECEPTOR_SIGNALING_PATHWAY	GOBP_NUCLEOTIDE_BINDING_DOMAIN_LEUCINE_RICH_REPEAT_CONTAINING_RECEPTOR_SIGNALING_PATHWAY	21	0.690334	1.8078	0.00613497	0.149091	0.833	2035	tags=43%, list=13%, signal=49%
GOBP_REGULATION_OF_SPROUTING_ANGIOGENESIS	GOBP_REGULATION_OF_SPROUTING_ANGIOGENESIS	36	0.663172	1.8069	0.00199601	0.148242	0.833	2017	tags=36%, list=13%, signal=41%
GOBP_CYTOKINE_MEDIATED_SIGNALING_PATHWAY	GOBP_CYTOKINE_MEDIATED_SIGNALING_PATHWAY	418	0.578072	1.80684	0	0.145966	0.833	3028	tags=41%, list=20%, signal=50%
GOBP_POSITIVE_REGULATION_OF_RESPONSE_TO_EXTERNAL_STIMULUS	GOBP_POSITIVE_REGULATION_OF_RESPONSE_TO_EXTERNAL_STIMULUS	391	0.596152	1.80605	0	0.145409	0.839	3409	tags=48%, list=22%, signal=60%
GOBP_POSITIVE_REGULATION_OF_VASCULATURE_DEVELOPMENT	GOBP_POSITIVE_REGULATION_OF_VASCULATURE_DEVELOPMENT	145	0.604785	1.80392	0	0.146148	0.844	3288	tags=48%, list=21%, signal=60%
GOBP_LEUKOCYTE_CELL_CELL_ADHESION	GOBP_LEUKOCYTE_CELL_CELL_ADHESION	337	0.636552	1.80226	0.00408163	0.146117	0.846	3090	tags=52%, list=20%, signal=64%
GOBP_MYELOID_LEUKOCYTE_ACTIVATION	GOBP_MYELOID_LEUKOCYTE_ACTIVATION	211	0.649081	1.80196	0	0.14444	0.847	3109	tags=57%, list=20%, signal=70%
GOBP_NEGATIVE_REGULATION_OF_INFLAMMATORY_RESPONSE	GOBP_NEGATIVE_REGULATION_OF_INFLAMMATORY_RESPONSE	130	0.615715	1.80157	0	0.142744	0.847	2927	tags=45%, list=19%, signal=56%
GOBP_NEGATIVE_REGULATION_OF_IMMUNE_SYSTEM_PROCESS	GOBP_NEGATIVE_REGULATION_OF_IMMUNE_SYSTEM_PROCESS	365	0.606961	1.80155	0.00204082	0.140734	0.847	3119	tags=48%, list=20%, signal=58%
GOBP_RAC_PROTEIN_SIGNAL_TRANSDUCTION	GOBP_RAC_PROTEIN_SIGNAL_TRANSDUCTION	40	0.524464	1.80082	0.00204082	0.139547	0.849	4157	tags=50%, list=27%, signal=68%
GOBP_FC_RECEPTOR_MEDIATED_STIMULATORY_SIGNALING_PATHWAY	GOBP_FC_RECEPTOR_MEDIATED_STIMULATORY_SIGNALING_PATHWAY	32	0.624775	1.799	0.00408998	0.140065	0.854	3737	tags=56%, list=24%, signal=74%
GOBP_NATURAL_KILLER_CELL_DIFFERENTIATION	GOBP_NATURAL_KILLER_CELL_DIFFERENTIATION	24	0.665825	1.79762	0.00801603	0.140119	0.857	3649	tags=50%, list=24%, signal=65%
GOBP_POSITIVE_REGULATION_OF_MACROAUTOPHAGY	GOBP_POSITIVE_REGULATION_OF_MACROAUTOPHAGY	67	0.416004	1.79506	0.0162933	0.141657	0.858	2991	tags=22%, list=19%, signal=28%
GOBP_VACUOLE_ORGANIZATION	GOBP_VACUOLE_ORGANIZATION	164	0.334982	1.79497	0.00400802	0.13984	0.858	5180	tags=33%, list=34%, signal=49%
GOBP_INTERLEUKIN_2_PRODUCTION	GOBP_INTERLEUKIN_2_PRODUCTION	61	0.725064	1.79433	0.004	0.138959	0.86	2646	tags=61%, list=17%, signal=73%
GOBP_REGULATION_OF_MONONUCLEAR_CELL_MIGRATION	GOBP_REGULATION_OF_MONONUCLEAR_CELL_MIGRATION	100	0.65941	1.79426	0	0.137294	0.86	3035	tags=55%, list=20%, signal=68%
GOBP_POSITIVE_REGULATION_OF_TUMOR_NECROSIS_FACTOR_SUPERFAMILY_CYTOKINE_PRODUCTION	GOBP_POSITIVE_REGULATION_OF_TUMOR_NECROSIS_FACTOR_SUPERFAMILY_CYTOKINE_PRODUCTION	97	0.648386	1.7921	0.00411523	0.138825	0.864	2605	tags=47%, list=17%, signal=57%
GOBP_NEGATIVE_REGULATION_OF_CYTOKINE_PRODUCTION	GOBP_NEGATIVE_REGULATION_OF_CYTOKINE_PRODUCTION	246	0.603389	1.7918	0	0.137605	0.864	2927	tags=46%, list=19%, signal=56%
GOBP_ANTIGEN_RECEPTOR_MEDIATED_SIGNALING_PATHWAY	GOBP_ANTIGEN_RECEPTOR_MEDIATED_SIGNALING_PATHWAY	155	0.683949	1.79174	0.00801603	0.135918	0.864	2605	tags=48%, list=17%, signal=57%
GOBP_POSITIVE_REGULATION_OF_CYSTEINE_TYPE_ENDOPEPTIDASE_ACTIVITY	GOBP_POSITIVE_REGULATION_OF_CYSTEINE_TYPE_ENDOPEPTIDASE_ACTIVITY	130	0.523875	1.79171	0.00208768	0.134245	0.864	2902	tags=35%, list=19%, signal=42%
GOBP_REGULATION_OF_RESPONSE_TO_BIOTIC_STIMULUS	GOBP_REGULATION_OF_RESPONSE_TO_BIOTIC_STIMULUS	307	0.546142	1.79059	0.0182186	0.134033	0.866	4140	tags=48%, list=27%, signal=64%
GOBP_REGULATION_OF_LEUKOCYTE_MEDIATED_IMMUNITY	GOBP_REGULATION_OF_LEUKOCYTE_MEDIATED_IMMUNITY	211	0.654901	1.79032	0.0040404	0.132667	0.866	3119	tags=54%, list=20%, signal=67%
GOBP_POSITIVE_REGULATION_OF_PROTEOLYSIS	GOBP_POSITIVE_REGULATION_OF_PROTEOLYSIS	333	0.417395	1.78888	0	0.132837	0.871	3002	tags=25%, list=20%, signal=31%
GOBP_REGULATION_OF_IMMUNE_EFFECTOR_PROCESS	GOBP_REGULATION_OF_IMMUNE_EFFECTOR_PROCESS	320	0.625744	1.78862	0.00204499	0.131696	0.872	3119	tags=50%, list=20%, signal=61%
GOBP_POSITIVE_REGULATION_OF_MONONUCLEAR_CELL_MIGRATION	GOBP_POSITIVE_REGULATION_OF_MONONUCLEAR_CELL_MIGRATION	60	0.704146	1.78804	0.00206612	0.131004	0.872	2953	tags=58%, list=19%, signal=72%
GOBP_REGULATION_OF_ADAPTIVE_IMMUNE_RESPONSE	GOBP_REGULATION_OF_ADAPTIVE_IMMUNE_RESPONSE	170	0.654768	1.78786	0.00202429	0.129653	0.875	2705	tags=52%, list=18%, signal=62%
GOBP_INTEGRIN_MEDIATED_SIGNALING_PATHWAY	GOBP_INTEGRIN_MEDIATED_SIGNALING_PATHWAY	99	0.601402	1.78758	0.00202429	0.128487	0.876	3587	tags=47%, list=23%, signal=62%
GOBP_REGULATION_OF_T_CELL_ACTIVATION	GOBP_REGULATION_OF_T_CELL_ACTIVATION	308	0.623057	1.78743	0.00601202	0.12715	0.877	3187	tags=52%, list=21%, signal=64%
GOBP_MYELOID_CELL_ACTIVATION_INVOLVED_IN_IMMUNE_RESPONSE	GOBP_MYELOID_CELL_ACTIVATION_INVOLVED_IN_IMMUNE_RESPONSE	90	0.651714	1.78717	0	0.125952	0.877	3109	tags=58%, list=20%, signal=72%
GOBP_REGULATION_OF_RAS_PROTEIN_SIGNAL_TRANSDUCTION	GOBP_REGULATION_OF_RAS_PROTEIN_SIGNAL_TRANSDUCTION	178	0.459414	1.78696	0	0.125012	0.877	4398	tags=47%, list=29%, signal=65%
GOBP_POSITIVE_REGULATION_OF_BLOOD_VESSEL_ENDOTHELIAL_CELL_MIGRATION	GOBP_POSITIVE_REGULATION_OF_BLOOD_VESSEL_ENDOTHELIAL_CELL_MIGRATION	49	0.584716	1.78619	0.00400802	0.124603	0.88	3288	tags=41%, list=21%, signal=52%
GOBP_NEGATIVE_REGULATION_OF_EXOCYTOSIS	GOBP_NEGATIVE_REGULATION_OF_EXOCYTOSIS	30	0.694767	1.78605	0	0.123366	0.88	2885	tags=53%, list=19%, signal=66%
GOBP_NEGATIVE_REGULATION_OF_INTERLEUKIN_6_PRODUCTION	GOBP_NEGATIVE_REGULATION_OF_INTERLEUKIN_6_PRODUCTION	43	0.769176	1.78572	0	0.122426	0.88	2927	tags=77%, list=19%, signal=95%
GOBP_REGULATION_OF_PHOSPHOPROTEIN_PHOSPHATASE_ACTIVITY	GOBP_REGULATION_OF_PHOSPHOPROTEIN_PHOSPHATASE_ACTIVITY	52	0.527184	1.78547	0.00414079	0.12149	0.88	3538	tags=35%, list=23%, signal=45%
GOBP_T_CELL_ACTIVATION	GOBP_T_CELL_ACTIVATION	458	0.608613	1.78501	0.00821355	0.120616	0.882	3374	tags=50%, list=22%, signal=62%
GOBP_REGULATION_OF_PHOSPHATIDYLINOSITOL_3_KINASE_ACTIVITY	GOBP_REGULATION_OF_PHOSPHATIDYLINOSITOL_3_KINASE_ACTIVITY	51	0.657836	1.78431	0	0.120207	0.882	2925	tags=51%, list=19%, signal=63%
GOBP_POSITIVE_REGULATION_OF_NIK_NF_KAPPAB_SIGNALING	GOBP_POSITIVE_REGULATION_OF_NIK_NF_KAPPAB_SIGNALING	63	0.63778	1.784	0.00200803	0.11935	0.883	3109	tags=48%, list=20%, signal=59%
GOBP_LEUKOCYTE_PROLIFERATION	GOBP_LEUKOCYTE_PROLIFERATION	303	0.622235	1.78305	0.00610998	0.119321	0.888	3383	tags=52%, list=22%, signal=66%
GOBP_REGULATION_OF_CELL_CELL_ADHESION	GOBP_REGULATION_OF_CELL_CELL_ADHESION	404	0.579456	1.78288	0	0.118359	0.888	3187	tags=46%, list=21%, signal=56%
GOBP_CELL_ACTIVATION_INVOLVED_IN_IMMUNE_RESPONSE	GOBP_CELL_ACTIVATION_INVOLVED_IN_IMMUNE_RESPONSE	267	0.60196	1.78287	0.00618557	0.117207	0.888	3419	tags=50%, list=22%, signal=63%
GOBP_NEGATIVE_REGULATION_OF_ACTIN_FILAMENT_BUNDLE_ASSEMBLY	GOBP_NEGATIVE_REGULATION_OF_ACTIN_FILAMENT_BUNDLE_ASSEMBLY	30	0.627224	1.78235	0	0.116559	0.888	2493	tags=43%, list=16%, signal=52%
GOBP_POSITIVE_REGULATION_OF_ALPHA_BETA_T_CELL_ACTIVATION	GOBP_POSITIVE_REGULATION_OF_ALPHA_BETA_T_CELL_ACTIVATION	63	0.70671	1.78124	0.00399202	0.116359	0.889	3128	tags=63%, list=20%, signal=79%
GOBP_CELLULAR_RESPONSE_TO_BIOTIC_STIMULUS	GOBP_CELLULAR_RESPONSE_TO_BIOTIC_STIMULUS	218	0.602227	1.78019	0.00409836	0.116357	0.891	2783	tags=41%, list=18%, signal=50%
GOBP_STRESS_FIBER_ASSEMBLY	GOBP_STRESS_FIBER_ASSEMBLY	101	0.489434	1.78014	0.00583658	0.115307	0.891	4437	tags=44%, list=29%, signal=61%
GOBP_MUSCLE_CELL_PROLIFERATION	GOBP_MUSCLE_CELL_PROLIFERATION	179	0.573615	1.77961	0	0.114811	0.892	3717	tags=47%, list=24%, signal=62%
GOBP_ANTIGEN_PROCESSING_AND_PRESENTATION_OF_PEPTIDE_ANTIGEN	GOBP_ANTIGEN_PROCESSING_AND_PRESENTATION_OF_PEPTIDE_ANTIGEN	52	0.665902	1.77565	0.00616016	0.117878	0.901	4349	tags=77%, list=28%, signal=107%
GOBP_CELLULAR_RESPONSE_TO_AMYLOID_BETA	GOBP_CELLULAR_RESPONSE_TO_AMYLOID_BETA	41	0.667844	1.77481	0.00206186	0.117547	0.903	3087	tags=56%, list=20%, signal=70%
GOBP_INTERLEUKIN_1_PRODUCTION	GOBP_INTERLEUKIN_1_PRODUCTION	97	0.685618	1.77468	0	0.116614	0.903	2567	tags=54%, list=17%, signal=64%
GOBP_BLOOD_VESSEL_ENDOTHELIAL_CELL_MIGRATION	GOBP_BLOOD_VESSEL_ENDOTHELIAL_CELL_MIGRATION	107	0.550271	1.77427	0.00200803	0.115812	0.905	3308	tags=41%, list=22%, signal=52%
GOBP_CELLULAR_RESPONSE_TO_MOLECULE_OF_BACTERIAL_ORIGIN	GOBP_CELLULAR_RESPONSE_TO_MOLECULE_OF_BACTERIAL_ORIGIN	193	0.628038	1.7733	0.00207469	0.115784	0.905	2783	tags=45%, list=18%, signal=54%
GOBP_LEUKOCYTE_MEDIATED_IMMUNITY	GOBP_LEUKOCYTE_MEDIATED_IMMUNITY	347	0.621889	1.77279	0.00410678	0.115301	0.906	3132	tags=50%, list=20%, signal=61%
GOBP_CYTOSOLIC_CALCIUM_ION_TRANSPORT	GOBP_CYTOSOLIC_CALCIUM_ION_TRANSPORT	157	0.590046	1.77251	0	0.114552	0.906	2896	tags=45%, list=19%, signal=54%
GOBP_VIRAL_LIFE_CYCLE	GOBP_VIRAL_LIFE_CYCLE	282	0.443023	1.77247	0.00201613	0.113591	0.906	3134	tags=28%, list=20%, signal=35%
GOBP_REGULATION_OF_LEUKOCYTE_MIGRATION	GOBP_REGULATION_OF_LEUKOCYTE_MIGRATION	192	0.633849	1.77062	0	0.114076	0.907	3363	tags=55%, list=22%, signal=70%
GOBP_POSITIVE_REGULATION_OF_LEUKOCYTE_MIGRATION	GOBP_POSITIVE_REGULATION_OF_LEUKOCYTE_MIGRATION	130	0.638643	1.76685	0	0.117137	0.91	2998	tags=52%, list=20%, signal=63%
GOBP_POSITIVE_REGULATION_OF_LEUKOCYTE_CELL_CELL_ADHESION	GOBP_POSITIVE_REGULATION_OF_LEUKOCYTE_CELL_CELL_ADHESION	222	0.662954	1.7668	0.00410678	0.116157	0.91	3172	tags=59%, list=21%, signal=73%
GOBP_REGULATION_OF_NITRIC_OXIDE_METABOLIC_PROCESS	GOBP_REGULATION_OF_NITRIC_OXIDE_METABOLIC_PROCESS	54	0.650455	1.76671	0.00204918	0.115244	0.91	3294	tags=56%, list=21%, signal=70%
GOBP_POSITIVE_REGULATION_OF_CELL_CELL_ADHESION	GOBP_POSITIVE_REGULATION_OF_CELL_CELL_ADHESION	262	0.631063	1.76637	0.00202429	0.114497	0.91	3128	tags=54%, list=20%, signal=66%
GOBP_NEGATIVE_REGULATION_OF_LEUKOCYTE_MEDIATED_IMMUNITY	GOBP_NEGATIVE_REGULATION_OF_LEUKOCYTE_MEDIATED_IMMUNITY	62	0.705222	1.76622	0.0020202	0.113744	0.912	2885	tags=61%, list=19%, signal=75%
GOBP_POSITIVE_REGULATION_OF_PROTEIN_TARGETING_TO_MEMBRANE	GOBP_POSITIVE_REGULATION_OF_PROTEIN_TARGETING_TO_MEMBRANE	18	0.591053	1.76541	0.00594059	0.113747	0.912	3024	tags=39%, list=20%, signal=48%
GOBP_REGULATION_OF_LYMPHOCYTE_ACTIVATION	GOBP_REGULATION_OF_LYMPHOCYTE_ACTIVATION	410	0.5914	1.76421	0.0119522	0.114017	0.914	3384	tags=50%, list=22%, signal=63%
GOBP_ACTIN_FILAMENT_ORGANIZATION	GOBP_ACTIN_FILAMENT_ORGANIZATION	401	0.45782	1.76381	0	0.113374	0.914	3677	tags=35%, list=24%, signal=45%
GOBP_INFLAMMATORY_RESPONSE_TO_ANTIGENIC_STIMULUS	GOBP_INFLAMMATORY_RESPONSE_TO_ANTIGENIC_STIMULUS	64	0.684592	1.76326	0	0.113107	0.914	2860	tags=48%, list=19%, signal=59%
GOBP_REGULATION_OF_T_CELL_PROLIFERATION	GOBP_REGULATION_OF_T_CELL_PROLIFERATION	157	0.654765	1.76324	0.0040568	0.112206	0.914	3187	tags=55%, list=21%, signal=69%
GOBP_RECEPTOR_MEDIATED_ENDOCYTOSIS	GOBP_RECEPTOR_MEDIATED_ENDOCYTOSIS	234	0.479647	1.763	0	0.111551	0.915	3294	tags=31%, list=21%, signal=39%
GOBP_REGULATION_OF_DEPHOSPHORYLATION	GOBP_REGULATION_OF_DEPHOSPHORYLATION	116	0.441455	1.76243	0	0.111209	0.915	3538	tags=32%, list=23%, signal=41%
GOBP_ACTIVATION_OF_CYSTEINE_TYPE_ENDOPEPTIDASE_ACTIVITY_INVOLVED_IN_APOPTOTIC_PROCESS	GOBP_ACTIVATION_OF_CYSTEINE_TYPE_ENDOPEPTIDASE_ACTIVITY_INVOLVED_IN_APOPTOTIC_PROCESS	74	0.555003	1.76216	0.00204499	0.110569	0.915	2896	tags=38%, list=19%, signal=46%
GOBP_POSITIVE_REGULATION_OF_AUTOPHAGY	GOBP_POSITIVE_REGULATION_OF_AUTOPHAGY	127	0.374644	1.76175	0	0.110087	0.915	4400	tags=30%, list=29%, signal=42%
GOBP_ADAPTIVE_IMMUNE_RESPONSE_BASED_ON_SOMATIC_RECOMBINATION_OF_IMMUNE_RECEPTORS_BUILT_FROM_IMMUNOGLOBULIN_SUPERFAMILY_DOMAINS	GOBP_ADAPTIVE_IMMUNE_RESPONSE_BASED_ON_SOMATIC_RECOMBINATION_OF_IMMUNE_RECEPTORS_BUILT_FROM_IMMUNOGLOBULIN_SUPERFAMILY_DOMAINS	271	0.631256	1.76153	0.00811359	0.109443	0.915	3132	tags=53%, list=20%, signal=65%
GOBP_REGULATION_OF_CELL_MIGRATION_INVOLVED_IN_SPROUTING_ANGIOGENESIS	GOBP_REGULATION_OF_CELL_MIGRATION_INVOLVED_IN_SPROUTING_ANGIOGENESIS	37	0.613532	1.76132	0.0019685	0.108743	0.915	3288	tags=46%, list=21%, signal=58%
GOBP_RESPONSE_TO_MURAMYL_DIPEPTIDE	GOBP_RESPONSE_TO_MURAMYL_DIPEPTIDE	18	0.661614	1.75998	0.010101	0.109214	0.915	2435	tags=44%, list=16%, signal=53%
GOBP_POSITIVE_REGULATION_OF_DEFENSE_RESPONSE	GOBP_POSITIVE_REGULATION_OF_DEFENSE_RESPONSE	253	0.608927	1.75792	0.0040568	0.110588	0.917	2953	tags=43%, list=19%, signal=53%
GOBP_CELLULAR_RESPONSE_TO_DSRNA	GOBP_CELLULAR_RESPONSE_TO_DSRNA	20	0.626158	1.75693	0.008	0.110707	0.919	2783	tags=35%, list=18%, signal=43%
GOBP_T_CELL_RECEPTOR_SIGNALING_PATHWAY	GOBP_T_CELL_RECEPTOR_SIGNALING_PATHWAY	116	0.641298	1.75679	0.0102249	0.110093	0.92	2605	tags=41%, list=17%, signal=48%
GOBP_POSITIVE_REGULATION_OF_PATTERN_RECOGNITION_RECEPTOR_SIGNALING_PATHWAY	GOBP_POSITIVE_REGULATION_OF_PATTERN_RECOGNITION_RECEPTOR_SIGNALING_PATHWAY	40	0.603103	1.75665	0.00986193	0.109369	0.92	1512	tags=33%, list=10%, signal=36%
GOBP_POSITIVE_REGULATION_OF_LEUKOCYTE_PROLIFERATION	GOBP_POSITIVE_REGULATION_OF_LEUKOCYTE_PROLIFERATION	145	0.657815	1.75559	0.00612245	0.109589	0.921	3172	tags=56%, list=21%, signal=70%
GOBP_LEUKOCYTE_MIGRATION	GOBP_LEUKOCYTE_MIGRATION	338	0.619667	1.75516	0	0.10916	0.921	3126	tags=51%, list=20%, signal=63%
GOBP_VASCULOGENESIS	GOBP_VASCULOGENESIS	77	0.584802	1.75453	0.00195695	0.109129	0.922	3844	tags=52%, list=25%, signal=69%
GOBP_POSITIVE_REGULATION_OF_ALPHA_BETA_T_CELL_DIFFERENTIATION	GOBP_POSITIVE_REGULATION_OF_ALPHA_BETA_T_CELL_DIFFERENTIATION	46	0.6752	1.75322	0.00401606	0.109619	0.924	3796	tags=65%, list=25%, signal=86%
GOBP_POSITIVE_REGULATION_OF_CHEMOTAXIS	GOBP_POSITIVE_REGULATION_OF_CHEMOTAXIS	130	0.61924	1.75315	0	0.108922	0.924	3409	tags=55%, list=22%, signal=71%
GOBP_REGULATION_OF_ALPHA_BETA_T_CELL_ACTIVATION	GOBP_REGULATION_OF_ALPHA_BETA_T_CELL_ACTIVATION	93	0.678429	1.75299	0.0100806	0.108278	0.924	3306	tags=60%, list=22%, signal=76%
GOBP_DEFENSE_RESPONSE_TO_SYMBIONT	GOBP_DEFENSE_RESPONSE_TO_SYMBIONT	253	0.491028	1.75298	0.0162933	0.10753	0.924	4188	tags=42%, list=27%, signal=57%
GOBP_NEGATIVE_REGULATION_OF_LOCOMOTION	GOBP_NEGATIVE_REGULATION_OF_LOCOMOTION	283	0.531416	1.7527	0	0.106978	0.924	3430	tags=41%, list=22%, signal=51%
GOBP_CALCIUM_ION_TRANSPORT_INTO_CYTOSOL	GOBP_CALCIUM_ION_TRANSPORT_INTO_CYTOSOL	145	0.605817	1.75176	0	0.10717	0.927	2896	tags=48%, list=19%, signal=59%
GOBP_POSITIVE_REGULATION_OF_DEPHOSPHORYLATION	GOBP_POSITIVE_REGULATION_OF_DEPHOSPHORYLATION	56	0.567522	1.75145	0	0.106825	0.927	3538	tags=50%, list=23%, signal=65%
GOBP_POSITIVE_REGULATION_OF_PROTEIN_CATABOLIC_PROCESS	GOBP_POSITIVE_REGULATION_OF_PROTEIN_CATABOLIC_PROCESS	215	0.375446	1.75105	0	0.106413	0.927	5057	tags=40%, list=33%, signal=58%
GOBP_EMBRYONIC_HEMOPOIESIS	GOBP_EMBRYONIC_HEMOPOIESIS	23	0.598092	1.75032	0.00407332	0.10634	0.927	3262	tags=43%, list=21%, signal=55%
GOBP_VASCULAR_ENDOTHELIAL_GROWTH_FACTOR_PRODUCTION	GOBP_VASCULAR_ENDOTHELIAL_GROWTH_FACTOR_PRODUCTION	34	0.727159	1.75023	0	0.105758	0.927	2663	tags=62%, list=17%, signal=75%
GOBP_POSITIVE_REGULATION_OF_CELL_ACTIVATION	GOBP_POSITIVE_REGULATION_OF_CELL_ACTIVATION	318	0.621623	1.75019	0.004158	0.105083	0.927	3128	tags=51%, list=20%, signal=63%
GOBP_T_CELL_MEDIATED_IMMUNITY	GOBP_T_CELL_MEDIATED_IMMUNITY	103	0.658865	1.75009	0.00814664	0.104526	0.927	2849	tags=53%, list=19%, signal=65%
GOBP_RESPONSE_TO_VIRUS	GOBP_RESPONSE_TO_VIRUS	336	0.490681	1.74969	0.00833333	0.104175	0.927	3105	tags=33%, list=20%, signal=41%
GOBP_REGULATION_OF_ACTIN_FILAMENT_ORGANIZATION	GOBP_REGULATION_OF_ACTIN_FILAMENT_ORGANIZATION	237	0.477195	1.74902	0	0.104115	0.927	3677	tags=37%, list=24%, signal=48%
GOBP_POSITIVE_REGULATION_OF_SYNCYTIUM_FORMATION_BY_PLASMA_MEMBRANE_FUSION	GOBP_POSITIVE_REGULATION_OF_SYNCYTIUM_FORMATION_BY_PLASMA_MEMBRANE_FUSION	20	0.698261	1.74882	0.00200401	0.103559	0.927	3195	tags=65%, list=21%, signal=82%
GOBP_REGULATION_OF_AUTOPHAGY	GOBP_REGULATION_OF_AUTOPHAGY	316	0.322924	1.74881	0	0.102887	0.927	4492	tags=28%, list=29%, signal=39%
GOBP_REGULATION_OF_ERYTHROCYTE_DIFFERENTIATION	GOBP_REGULATION_OF_ERYTHROCYTE_DIFFERENTIATION	42	0.494918	1.7479	0.0105042	0.103062	0.928	3737	tags=31%, list=24%, signal=41%
GOBP_I_KAPPAB_PHOSPHORYLATION	GOBP_I_KAPPAB_PHOSPHORYLATION	20	0.724565	1.74769	0	0.102612	0.928	1672	tags=40%, list=11%, signal=45%
GOBP_MACROPHAGE_MIGRATION	GOBP_MACROPHAGE_MIGRATION	47	0.702343	1.74733	0.00203666	0.102329	0.928	3377	tags=62%, list=22%, signal=79%
GOBP_ENDOTHELIAL_CELL_MIGRATION	GOBP_ENDOTHELIAL_CELL_MIGRATION	201	0.528807	1.74726	0	0.101764	0.928	3409	tags=41%, list=22%, signal=52%
GOBP_REGULATION_OF_CYSTEINE_TYPE_ENDOPEPTIDASE_ACTIVITY	GOBP_REGULATION_OF_CYSTEINE_TYPE_ENDOPEPTIDASE_ACTIVITY	206	0.49071	1.74687	0.0021322	0.101508	0.928	2936	tags=33%, list=19%, signal=41%
GOBP_POSITIVE_REGULATION_OF_T_CELL_PROLIFERATION	GOBP_POSITIVE_REGULATION_OF_T_CELL_PROLIFERATION	94	0.70869	1.74583	0.00402414	0.101902	0.928	2207	tags=55%, list=14%, signal=64%
GOBP_POSITIVE_REGULATION_OF_PHOSPHATASE_ACTIVITY	GOBP_POSITIVE_REGULATION_OF_PHOSPHATASE_ACTIVITY	34	0.646247	1.74578	0	0.101316	0.928	3757	tags=62%, list=24%, signal=82%
GOBP_REGULATION_OF_ACTIN_CYTOSKELETON_REORGANIZATION	GOBP_REGULATION_OF_ACTIN_CYTOSKELETON_REORGANIZATION	39	0.588738	1.74544	0.00406504	0.100921	0.928	1845	tags=33%, list=12%, signal=38%
GOBP_MODULATION_BY_HOST_OF_SYMBIONT_PROCESS	GOBP_MODULATION_BY_HOST_OF_SYMBIONT_PROCESS	59	0.485328	1.74521	0.00411523	0.100483	0.928	3171	tags=25%, list=21%, signal=32%
GOBP_VIRAL_PROCESS	GOBP_VIRAL_PROCESS	376	0.398755	1.74482	0.00613497	0.10031	0.928	5004	tags=38%, list=33%, signal=55%
GOBP_POSITIVE_REGULATION_OF_PEPTIDYL_TYROSINE_PHOSPHORYLATION	GOBP_POSITIVE_REGULATION_OF_PEPTIDYL_TYROSINE_PHOSPHORYLATION	170	0.568249	1.74439	0	0.100239	0.928	3003	tags=45%, list=20%, signal=55%
GOBP_T_CELL_DIFFERENTIATION	GOBP_T_CELL_DIFFERENTIATION	245	0.604379	1.74428	0.010101	0.0997194	0.928	3090	tags=46%, list=20%, signal=57%
GOBP_MYELOID_LEUKOCYTE_MEDIATED_IMMUNITY	GOBP_MYELOID_LEUKOCYTE_MEDIATED_IMMUNITY	100	0.615781	1.74303	0	0.100271	0.929	3104	tags=48%, list=20%, signal=60%
GOBP_MACROPHAGE_ACTIVATION	GOBP_MACROPHAGE_ACTIVATION	95	0.654359	1.74252	0.00205761	0.100038	0.931	3363	tags=65%, list=22%, signal=83%
GOBP_ACTIN_POLYMERIZATION_OR_DEPOLYMERIZATION	GOBP_ACTIN_POLYMERIZATION_OR_DEPOLYMERIZATION	171	0.487481	1.74212	0.00206186	0.0997614	0.931	3454	tags=38%, list=22%, signal=48%
GOBP_NEGATIVE_REGULATION_OF_INTERLEUKIN_1_PRODUCTION	GOBP_NEGATIVE_REGULATION_OF_INTERLEUKIN_1_PRODUCTION	33	0.73536	1.74175	0.00206612	0.0994902	0.932	2567	tags=58%, list=17%, signal=69%
GOBP_POSITIVE_REGULATION_OF_PHAGOCYTOSIS	GOBP_POSITIVE_REGULATION_OF_PHAGOCYTOSIS	65	0.679091	1.74135	0.00404858	0.0992883	0.933	3845	tags=72%, list=25%, signal=96%
GOBP_REGULATION_OF_PROTEIN_TARGETING_TO_MEMBRANE	GOBP_REGULATION_OF_PROTEIN_TARGETING_TO_MEMBRANE	21	0.583999	1.74035	0.00813008	0.0995383	0.936	3024	tags=38%, list=20%, signal=47%
GOBP_MONONUCLEAR_CELL_DIFFERENTIATION	GOBP_MONONUCLEAR_CELL_DIFFERENTIATION	403	0.572059	1.74005	0.0102041	0.0991793	0.936	3104	tags=42%, list=20%, signal=51%
GOBP_REGULATION_OF_PEPTIDYL_TYROSINE_PHOSPHORYLATION	GOBP_REGULATION_OF_PEPTIDYL_TYROSINE_PHOSPHORYLATION	231	0.528178	1.73992	0	0.0987589	0.936	3003	tags=40%, list=20%, signal=49%
GOBP_LIPOPOLYSACCHARIDE_MEDIATED_SIGNALING_PATHWAY	GOBP_LIPOPOLYSACCHARIDE_MEDIATED_SIGNALING_PATHWAY	57	0.64	1.7399	0.0102459	0.0982097	0.936	2717	tags=46%, list=18%, signal=55%
GOBP_POSITIVE_REGULATION_OF_CATABOLIC_PROCESS	GOBP_POSITIVE_REGULATION_OF_CATABOLIC_PROCESS	469	0.335921	1.73977	0	0.0977444	0.936	4649	tags=31%, list=30%, signal=43%
GOBP_NEGATIVE_REGULATION_OF_INNATE_IMMUNE_RESPONSE	GOBP_NEGATIVE_REGULATION_OF_INNATE_IMMUNE_RESPONSE	63	0.579911	1.73892	0.0204082	0.0979085	0.936	4586	tags=54%, list=30%, signal=77%
GOBP_REGULATION_OF_LEUKOCYTE_PROLIFERATION	GOBP_REGULATION_OF_LEUKOCYTE_PROLIFERATION	232	0.634566	1.73864	0.00621118	0.0976053	0.936	3383	tags=56%, list=22%, signal=71%
GOBP_APOPTOTIC_CELL_CLEARANCE	GOBP_APOPTOTIC_CELL_CLEARANCE	46	0.653898	1.73685	0.00412371	0.0990576	0.936	3132	tags=54%, list=20%, signal=68%
GOBP_REGULATION_OF_MYELOID_LEUKOCYTE_MEDIATED_IMMUNITY	GOBP_REGULATION_OF_MYELOID_LEUKOCYTE_MEDIATED_IMMUNITY	58	0.650015	1.73677	0	0.0986531	0.936	3104	tags=50%, list=20%, signal=62%
GOBP_LEUKOCYTE_ADHESION_TO_VASCULAR_ENDOTHELIAL_CELL	GOBP_LEUKOCYTE_ADHESION_TO_VASCULAR_ENDOTHELIAL_CELL	46	0.712982	1.73655	0	0.0983376	0.936	2524	tags=57%, list=16%, signal=67%
GOBP_ADAPTIVE_IMMUNE_RESPONSE	GOBP_ADAPTIVE_IMMUNE_RESPONSE	401	0.641721	1.73628	0.00824742	0.0980555	0.936	2642	tags=51%, list=17%, signal=60%
GOBP_POSITIVE_REGULATION_OF_LEUKOCYTE_CHEMOTAXIS	GOBP_POSITIVE_REGULATION_OF_LEUKOCYTE_CHEMOTAXIS	85	0.631596	1.73615	0.00200803	0.0976496	0.936	2953	tags=51%, list=19%, signal=62%
GOBP_MONONUCLEAR_CELL_MIGRATION	GOBP_MONONUCLEAR_CELL_MIGRATION	168	0.652088	1.7359	0.00204918	0.0973211	0.936	3044	tags=57%, list=20%, signal=70%
GOBP_ANGIOGENESIS_INVOLVED_IN_WOUND_HEALING	GOBP_ANGIOGENESIS_INVOLVED_IN_WOUND_HEALING	25	0.647515	1.73581	0	0.0968262	0.936	3267	tags=44%, list=21%, signal=56%
GOBP_NEGATIVE_REGULATION_OF_TUMOR_NECROSIS_FACTOR_SUPERFAMILY_CYTOKINE_PRODUCTION	GOBP_NEGATIVE_REGULATION_OF_TUMOR_NECROSIS_FACTOR_SUPERFAMILY_CYTOKINE_PRODUCTION	55	0.704716	1.73511	0	0.0969769	0.938	2723	tags=62%, list=18%, signal=75%
GOBP_NEGATIVE_REGULATION_OF_RESPONSE_TO_CYTOKINE_STIMULUS	GOBP_NEGATIVE_REGULATION_OF_RESPONSE_TO_CYTOKINE_STIMULUS	67	0.581822	1.73452	0.00200803	0.0970024	0.939	2829	tags=34%, list=18%, signal=42%
GOBP_REGULATION_OF_CALCIUM_ION_TRANSPORT_INTO_CYTOSOL	GOBP_REGULATION_OF_CALCIUM_ION_TRANSPORT_INTO_CYTOSOL	90	0.59969	1.73421	0	0.0967216	0.939	2995	tags=49%, list=20%, signal=60%
GOBP_MACROPHAGE_CHEMOTAXIS	GOBP_MACROPHAGE_CHEMOTAXIS	32	0.665193	1.7333	0.00621118	0.0971762	0.94	3363	tags=56%, list=22%, signal=72%
GOBP_SECOND_MESSENGER_MEDIATED_SIGNALING	GOBP_SECOND_MESSENGER_MEDIATED_SIGNALING	273	0.569873	1.73318	0	0.0967345	0.94	3057	tags=41%, list=20%, signal=50%
GOBP_REGULATION_OF_SYNCYTIUM_FORMATION_BY_PLASMA_MEMBRANE_FUSION	GOBP_REGULATION_OF_SYNCYTIUM_FORMATION_BY_PLASMA_MEMBRANE_FUSION	25	0.649783	1.7331	0	0.0962723	0.94	3195	tags=64%, list=21%, signal=81%
GOBP_REGULATION_OF_LYMPHOCYTE_MIGRATION	GOBP_REGULATION_OF_LYMPHOCYTE_MIGRATION	51	0.666406	1.73285	0.00623701	0.095966	0.94	3035	tags=53%, list=20%, signal=66%
GOBP_NEGATIVE_REGULATION_OF_EPITHELIAL_CELL_PROLIFERATION	GOBP_NEGATIVE_REGULATION_OF_EPITHELIAL_CELL_PROLIFERATION	118	0.550224	1.73274	0.00201207	0.0955757	0.941	3174	tags=40%, list=21%, signal=50%
GOBP_REGULATION_OF_CHEMOTAXIS	GOBP_REGULATION_OF_CHEMOTAXIS	196	0.579511	1.73009	0	0.097511	0.945	3442	tags=50%, list=22%, signal=64%
GOBP_CELLULAR_EXTRAVASATION	GOBP_CELLULAR_EXTRAVASATION	71	0.653898	1.7297	0.00194553	0.0973875	0.945	2642	tags=51%, list=17%, signal=61%
GOBP_NEGATIVE_REGULATION_OF_RESPONSE_TO_EXTERNAL_STIMULUS	GOBP_NEGATIVE_REGULATION_OF_RESPONSE_TO_EXTERNAL_STIMULUS	347	0.534368	1.72963	0	0.0969457	0.945	3358	tags=42%, list=22%, signal=53%
GOBP_NEGATIVE_REGULATION_OF_INTERLEUKIN_1_BETA_PRODUCTION	GOBP_NEGATIVE_REGULATION_OF_INTERLEUKIN_1_BETA_PRODUCTION	27	0.741137	1.7285	0	0.0973505	0.946	2896	tags=63%, list=19%, signal=77%
GOBP_NEGATIVE_REGULATION_OF_AUTOPHAGOSOME_ASSEMBLY	GOBP_NEGATIVE_REGULATION_OF_AUTOPHAGOSOME_ASSEMBLY	15	0.551728	1.72827	0.0142857	0.0970138	0.946	2293	tags=27%, list=15%, signal=31%
GOBP_RESPONSE_TO_AMYLOID_BETA	GOBP_RESPONSE_TO_AMYLOID_BETA	49	0.654644	1.72821	0	0.0965363	0.946	3087	tags=55%, list=20%, signal=69%
GOBP_POSITIVE_REGULATION_OF_INFLAMMATORY_RESPONSE	GOBP_POSITIVE_REGULATION_OF_INFLAMMATORY_RESPONSE	128	0.653313	1.72799	0	0.0962666	0.946	3109	tags=53%, list=20%, signal=66%
GOBP_NEGATIVE_REGULATION_OF_INTERLEUKIN_2_PRODUCTION	GOBP_NEGATIVE_REGULATION_OF_INTERLEUKIN_2_PRODUCTION	27	0.761769	1.72794	0.00607287	0.0958269	0.946	2549	tags=70%, list=17%, signal=84%
GOBP_NEGATIVE_REGULATION_OF_PHOSPHORUS_METABOLIC_PROCESS	GOBP_NEGATIVE_REGULATION_OF_PHOSPHORUS_METABOLIC_PROCESS	379	0.430008	1.72729	0	0.0958404	0.946	4682	tags=44%, list=30%, signal=61%
GOBP_POSITIVE_REGULATION_OF_ENDOCYTOSIS	GOBP_POSITIVE_REGULATION_OF_ENDOCYTOSIS	95	0.532705	1.72725	0.00201613	0.0953846	0.946	4396	tags=51%, list=29%, signal=70%
GOBP_PRODUCTION_OF_MOLECULAR_MEDIATOR_OF_IMMUNE_RESPONSE	GOBP_PRODUCTION_OF_MOLECULAR_MEDIATOR_OF_IMMUNE_RESPONSE	197	0.585489	1.72716	0.0120724	0.0949851	0.947	2098	tags=37%, list=14%, signal=42%
GOBP_RESPONSE_TO_DSRNA	GOBP_RESPONSE_TO_DSRNA	49	0.494128	1.72703	0.006	0.0946276	0.947	4120	tags=35%, list=27%, signal=47%
GOBP_REGULATION_OF_PRODUCTION_OF_MOLECULAR_MEDIATOR_OF_IMMUNE_RESPONSE	GOBP_REGULATION_OF_PRODUCTION_OF_MOLECULAR_MEDIATOR_OF_IMMUNE_RESPONSE	154	0.601201	1.72666	0.00598802	0.0944702	0.948	2849	tags=44%, list=19%, signal=53%
GOBP_REGULATION_OF_PHAGOCYTOSIS	GOBP_REGULATION_OF_PHAGOCYTOSIS	91	0.625887	1.72658	0.00813008	0.0941052	0.948	3320	tags=57%, list=22%, signal=72%
GOBP_SMOOTH_MUSCLE_CELL_PROLIFERATION	GOBP_SMOOTH_MUSCLE_CELL_PROLIFERATION	133	0.581936	1.72615	0	0.0940507	0.948	3430	tags=48%, list=22%, signal=61%
GOBP_CYTOKINE_PRODUCTION_INVOLVED_IN_IMMUNE_RESPONSE	GOBP_CYTOKINE_PRODUCTION_INVOLVED_IN_IMMUNE_RESPONSE	95	0.632649	1.72574	0.00205339	0.0939251	0.948	2953	tags=51%, list=19%, signal=62%
GOBP_POSITIVE_REGULATION_OF_RESPONSE_TO_CYTOKINE_STIMULUS	GOBP_POSITIVE_REGULATION_OF_RESPONSE_TO_CYTOKINE_STIMULUS	55	0.547166	1.72573	0.0224033	0.0934938	0.948	2642	tags=33%, list=17%, signal=39%
GOBP_NEGATIVE_REGULATION_OF_ADAPTIVE_IMMUNE_RESPONSE	GOBP_NEGATIVE_REGULATION_OF_ADAPTIVE_IMMUNE_RESPONSE	58	0.667651	1.72477	0.00808081	0.0937232	0.949	2705	tags=53%, list=18%, signal=65%
GOBP_PEPTIDYL_TYROSINE_MODIFICATION	GOBP_PEPTIDYL_TYROSINE_MODIFICATION	344	0.504506	1.7247	0.00204918	0.0933515	0.949	3807	tags=45%, list=25%, signal=59%
GOBP_AMYLOID_BETA_CLEARANCE	GOBP_AMYLOID_BETA_CLEARANCE	36	0.652222	1.72429	0.00204918	0.0932581	0.949	2986	tags=50%, list=19%, signal=62%
GOBP_ACTIVATED_T_CELL_PROLIFERATION	GOBP_ACTIVATED_T_CELL_PROLIFERATION	44	0.703238	1.72388	0.002	0.0930918	0.949	3172	tags=64%, list=21%, signal=80%
GOBP_POSITIVE_REGULATION_OF_INTERLEUKIN_1_PRODUCTION	GOBP_POSITIVE_REGULATION_OF_INTERLEUKIN_1_PRODUCTION	61	0.686578	1.72377	0	0.0928054	0.949	2517	tags=56%, list=16%, signal=66%
GOBP_MICROGLIAL_CELL_ACTIVATION	GOBP_MICROGLIAL_CELL_ACTIVATION	41	0.732623	1.72372	0.00414079	0.0924425	0.949	2846	tags=73%, list=19%, signal=90%
GOBP_REGULATION_OF_ALPHA_BETA_T_CELL_DIFFERENTIATION	GOBP_REGULATION_OF_ALPHA_BETA_T_CELL_DIFFERENTIATION	63	0.659806	1.7235	0.00606061	0.0922217	0.949	3796	tags=62%, list=25%, signal=82%
GOBP_ANTIGEN_PROCESSING_AND_PRESENTATION	GOBP_ANTIGEN_PROCESSING_AND_PRESENTATION	95	0.63814	1.72329	0.00632911	0.0919146	0.949	3358	tags=58%, list=22%, signal=74%
GOBP_ENDOTHELIAL_CELL_PROLIFERATION	GOBP_ENDOTHELIAL_CELL_PROLIFERATION	140	0.591146	1.723	0	0.0917276	0.949	3409	tags=46%, list=22%, signal=58%
GOBP_REGULATION_OF_HEMOPOIESIS	GOBP_REGULATION_OF_HEMOPOIESIS	328	0.530497	1.72288	0.00838574	0.0914168	0.949	3090	tags=39%, list=20%, signal=48%
GOBP_POSITIVE_REGULATION_OF_JNK_CASCADE	GOBP_POSITIVE_REGULATION_OF_JNK_CASCADE	92	0.545369	1.72241	0	0.0913802	0.95	3278	tags=42%, list=21%, signal=54%
GOBP_CELL_VOLUME_HOMEOSTASIS	GOBP_CELL_VOLUME_HOMEOSTASIS	31	0.542528	1.72176	0.00407332	0.0915691	0.953	2836	tags=26%, list=18%, signal=32%
GOBP_CELL_CHEMOTAXIS	GOBP_CELL_CHEMOTAXIS	261	0.609385	1.72166	0.00201613	0.0912303	0.953	3374	tags=52%, list=22%, signal=66%
GOBP_JNK_CASCADE	GOBP_JNK_CASCADE	168	0.489046	1.72165	0	0.0908278	0.953	3430	tags=36%, list=22%, signal=46%
GOBP_LYMPHOCYTE_MEDIATED_IMMUNITY	GOBP_LYMPHOCYTE_MEDIATED_IMMUNITY	258	0.626619	1.7215	0.0122951	0.0905869	0.953	3132	tags=51%, list=20%, signal=63%
GOBP_POSITIVE_REGULATION_OF_INTERLEUKIN_1_BETA_PRODUCTION	GOBP_POSITIVE_REGULATION_OF_INTERLEUKIN_1_BETA_PRODUCTION	52	0.714627	1.72111	0	0.0904994	0.953	2517	tags=62%, list=16%, signal=73%
GOBP_VACUOLAR_LOCALIZATION	GOBP_VACUOLAR_LOCALIZATION	74	0.525152	1.72097	0.00614754	0.0902005	0.953	4380	tags=47%, list=29%, signal=66%
GOBP_CLATHRIN_DEPENDENT_ENDOCYTOSIS	GOBP_CLATHRIN_DEPENDENT_ENDOCYTOSIS	46	0.482656	1.72065	0.00398406	0.0900448	0.953	5864	tags=54%, list=38%, signal=88%
GOBP_REGULATION_OF_CELL_SHAPE	GOBP_REGULATION_OF_CELL_SHAPE	139	0.479005	1.72031	0.00210526	0.0900215	0.953	3931	tags=42%, list=26%, signal=57%
GOBP_ACTIVATION_OF_INNATE_IMMUNE_RESPONSE	GOBP_ACTIVATION_OF_INNATE_IMMUNE_RESPONSE	50	0.607546	1.71985	0.0261569	0.089955	0.953	2787	tags=36%, list=18%, signal=44%
GOBP_REGULATION_OF_T_CELL_DIFFERENTIATION	GOBP_REGULATION_OF_T_CELL_DIFFERENTIATION	140	0.602085	1.71878	0.0141129	0.0905742	0.953	3090	tags=47%, list=20%, signal=58%
GOBP_NEGATIVE_REGULATION_OF_KINASE_ACTIVITY	GOBP_NEGATIVE_REGULATION_OF_KINASE_ACTIVITY	203	0.437974	1.71846	0	0.0903932	0.953	4669	tags=46%, list=30%, signal=65%
GOBP_REGULATION_OF_ACTIN_FILAMENT_BUNDLE_ASSEMBLY	GOBP_REGULATION_OF_ACTIN_FILAMENT_BUNDLE_ASSEMBLY	96	0.491292	1.71815	0.00984252	0.0902912	0.953	2593	tags=29%, list=17%, signal=35%
GOBP_POSITIVE_REGULATION_OF_PEPTIDASE_ACTIVITY	GOBP_POSITIVE_REGULATION_OF_PEPTIDASE_ACTIVITY	173	0.479024	1.71785	0	0.0901698	0.953	3114	tags=32%, list=20%, signal=39%
GOBP_NEGATIVE_REGULATION_OF_REGULATED_SECRETORY_PATHWAY	GOBP_NEGATIVE_REGULATION_OF_REGULATED_SECRETORY_PATHWAY	22	0.724095	1.71773	0.00198807	0.0898421	0.953	2885	tags=59%, list=19%, signal=73%
GOBP_LEUKOCYTE_DEGRANULATION	GOBP_LEUKOCYTE_DEGRANULATION	72	0.624413	1.71675	0.00816326	0.0904134	0.954	1738	tags=39%, list=11%, signal=44%
GOBP_POSITIVE_REGULATION_OF_PROTEIN_BINDING	GOBP_POSITIVE_REGULATION_OF_PROTEIN_BINDING	80	0.467739	1.71645	0	0.0903023	0.954	4400	tags=41%, list=29%, signal=58%
GOBP_POSITIVE_REGULATION_OF_LIPASE_ACTIVITY	GOBP_POSITIVE_REGULATION_OF_LIPASE_ACTIVITY	65	0.609678	1.71586	0	0.0904065	0.954	2675	tags=43%, list=17%, signal=52%
GOBP_REGULATION_OF_LEUKOCYTE_DEGRANULATION	GOBP_REGULATION_OF_LEUKOCYTE_DEGRANULATION	46	0.639965	1.71436	0.0104167	0.0913076	0.954	3737	tags=54%, list=24%, signal=72%
GOBP_PROCESS_UTILIZING_AUTOPHAGIC_MECHANISM	GOBP_PROCESS_UTILIZING_AUTOPHAGIC_MECHANISM	492	0.289636	1.71399	0.002	0.0912916	0.954	5065	tags=30%, list=33%, signal=43%
GOBP_NEGATIVE_REGULATION_OF_NIK_NF_KAPPAB_SIGNALING	GOBP_NEGATIVE_REGULATION_OF_NIK_NF_KAPPAB_SIGNALING	22	0.642792	1.7134	0.00211864	0.0914025	0.954	3616	tags=50%, list=24%, signal=65%
GOBP_REGULATION_OF_T_CELL_MEDIATED_IMMUNITY	GOBP_REGULATION_OF_T_CELL_MEDIATED_IMMUNITY	80	0.680688	1.7131	0.00828157	0.0912351	0.955	2098	tags=49%, list=14%, signal=56%
GOBP_ACTIVATION_OF_GTPASE_ACTIVITY	GOBP_ACTIVATION_OF_GTPASE_ACTIVITY	97	0.482587	1.713	0.00391389	0.0909237	0.955	4396	tags=47%, list=29%, signal=66%
GOBP_CELL_JUNCTION_DISASSEMBLY	GOBP_CELL_JUNCTION_DISASSEMBLY	21	0.69774	1.71296	0.00594059	0.0905772	0.955	3002	tags=57%, list=20%, signal=71%
GOBP_RESPONSE_TO_MOLECULE_OF_BACTERIAL_ORIGIN	GOBP_RESPONSE_TO_MOLECULE_OF_BACTERIAL_ORIGIN	310	0.583146	1.71262	0	0.0904466	0.956	3132	tags=46%, list=20%, signal=56%
GOBP_RHO_PROTEIN_SIGNAL_TRANSDUCTION	GOBP_RHO_PROTEIN_SIGNAL_TRANSDUCTION	128	0.49654	1.71242	0	0.0902726	0.956	4398	tags=48%, list=29%, signal=67%
GOBP_ALPHA_BETA_T_CELL_ACTIVATION	GOBP_ALPHA_BETA_T_CELL_ACTIVATION	143	0.648484	1.71217	0.0121704	0.0900733	0.956	3306	tags=57%, list=22%, signal=72%
GOBP_T_CELL_DIFFERENTIATION_IN_THYMUS	GOBP_T_CELL_DIFFERENTIATION_IN_THYMUS	74	0.616323	1.7118	0.00833333	0.090063	0.956	3055	tags=42%, list=20%, signal=52%
GOBP_LEUKOCYTE_CHEMOTAXIS	GOBP_LEUKOCYTE_CHEMOTAXIS	198	0.631224	1.71078	0.0040568	0.0905608	0.957	2998	tags=52%, list=20%, signal=64%
GOBP_POSITIVE_REGULATION_OF_SMOOTH_MUSCLE_CELL_PROLIFERATION	GOBP_POSITIVE_REGULATION_OF_SMOOTH_MUSCLE_CELL_PROLIFERATION	78	0.601996	1.71069	0.0020202	0.0902752	0.957	3297	tags=53%, list=21%, signal=67%
GOBP_MYELOID_CELL_DIFFERENTIATION	GOBP_MYELOID_CELL_DIFFERENTIATION	344	0.452874	1.71064	0.0020284	0.0899758	0.957	4207	tags=40%, list=27%, signal=54%
GOBP_COLLAGEN_ACTIVATED_SIGNALING_PATHWAY	GOBP_COLLAGEN_ACTIVATED_SIGNALING_PATHWAY	16	0.784865	1.71049	0	0.0897266	0.957	2018	tags=56%, list=13%, signal=65%
GOBP_REGULATION_OF_LYMPHOCYTE_MEDIATED_IMMUNITY	GOBP_REGULATION_OF_LYMPHOCYTE_MEDIATED_IMMUNITY	151	0.658917	1.71004	0.0123711	0.0897435	0.959	2849	tags=53%, list=19%, signal=64%
GOBP_SLEEP	GOBP_SLEEP	27	0.667888	1.70995	0.0019802	0.0894364	0.959	2448	tags=44%, list=16%, signal=53%
GOBP_RESPONSE_TO_FLUID_SHEAR_STRESS	GOBP_RESPONSE_TO_FLUID_SHEAR_STRESS	32	0.619644	1.70973	0.00823045	0.0893106	0.96	4534	tags=66%, list=30%, signal=93%
GOBP_TRANSFORMING_GROWTH_FACTOR_BETA_RECEPTOR_SIGNALING_PATHWAY	GOBP_TRANSFORMING_GROWTH_FACTOR_BETA_RECEPTOR_SIGNALING_PATHWAY	183	0.474853	1.70965	0.01002	0.0889848	0.961	3824	tags=35%, list=25%, signal=46%
GOBP_NEGATIVE_REGULATION_OF_CALCIUM_MEDIATED_SIGNALING	GOBP_NEGATIVE_REGULATION_OF_CALCIUM_MEDIATED_SIGNALING	19	0.732418	1.70947	0.00212766	0.0888812	0.961	3020	tags=58%, list=20%, signal=72%
GOBP_ANTIGEN_PROCESSING_AND_PRESENTATION_OF_EXOGENOUS_PEPTIDE_ANTIGEN	GOBP_ANTIGEN_PROCESSING_AND_PRESENTATION_OF_EXOGENOUS_PEPTIDE_ANTIGEN	30	0.715013	1.70946	0.00204499	0.0885367	0.961	3871	tags=80%, list=25%, signal=107%
GOBP_REGULATION_OF_CALCIUM_ION_TRANSPORT	GOBP_REGULATION_OF_CALCIUM_ION_TRANSPORT	214	0.527517	1.70936	0	0.0882677	0.961	3737	tags=47%, list=24%, signal=61%
GOBP_POSITIVE_REGULATION_OF_LAMELLIPODIUM_ASSEMBLY	GOBP_POSITIVE_REGULATION_OF_LAMELLIPODIUM_ASSEMBLY	26	0.546845	1.70754	0.0182186	0.0894668	0.963	4777	tags=46%, list=31%, signal=67%
GOBP_SYNCYTIUM_FORMATION	GOBP_SYNCYTIUM_FORMATION	54	0.557719	1.70713	0	0.0894281	0.963	3195	tags=41%, list=21%, signal=51%
GOBP_PLATELET_MORPHOGENESIS	GOBP_PLATELET_MORPHOGENESIS	21	0.550825	1.70492	0.0148305	0.0907379	0.964	2508	tags=29%, list=16%, signal=34%
GOBP_NEGATIVE_REGULATION_OF_PHOSPHORYLATION	GOBP_NEGATIVE_REGULATION_OF_PHOSPHORYLATION	328	0.431631	1.70491	0	0.0904079	0.964	4678	tags=45%, list=30%, signal=64%
GOBP_BIOLOGICAL_PROCESS_INVOLVED_IN_INTERACTION_WITH_HOST	GOBP_BIOLOGICAL_PROCESS_INVOLVED_IN_INTERACTION_WITH_HOST	173	0.452348	1.7049	0.00608519	0.0900654	0.964	2730	tags=27%, list=18%, signal=32%
GOBP_REGULATION_OF_LIPID_KINASE_ACTIVITY	GOBP_REGULATION_OF_LIPID_KINASE_ACTIVITY	62	0.571335	1.70425	0.00614754	0.0902239	0.965	2925	tags=44%, list=19%, signal=54%
GOBP_REGULATION_OF_PHOSPHATIDYLINOSITOL_3_KINASE_SIGNALING	GOBP_REGULATION_OF_PHOSPHATIDYLINOSITOL_3_KINASE_SIGNALING	100	0.588659	1.70409	0	0.0900358	0.965	3807	tags=53%, list=25%, signal=70%
GOBP_B_CELL_HOMEOSTASIS	GOBP_B_CELL_HOMEOSTASIS	30	0.630922	1.70401	0.0121951	0.089817	0.965	1996	tags=33%, list=13%, signal=38%
GOBP_POSITIVE_REGULATION_OF_PROTEIN_EXPORT_FROM_NUCLEUS	GOBP_POSITIVE_REGULATION_OF_PROTEIN_EXPORT_FROM_NUCLEUS	17	0.571123	1.7037	0.00835073	0.0897165	0.967	3556	tags=29%, list=23%, signal=38%
GOBP_POSITIVE_REGULATION_OF_STRESS_ACTIVATED_PROTEIN_KINASE_SIGNALING_CASCADE	GOBP_POSITIVE_REGULATION_OF_STRESS_ACTIVATED_PROTEIN_KINASE_SIGNALING_CASCADE	123	0.52458	1.70309	0	0.0898776	0.967	4068	tags=48%, list=26%, signal=65%
GOBP_POSITIVE_REGULATION_OF_STEROL_TRANSPORT	GOBP_POSITIVE_REGULATION_OF_STEROL_TRANSPORT	36	0.617124	1.70299	0	0.0896389	0.967	4501	tags=61%, list=29%, signal=86%
GOBP_POSITIVE_REGULATION_OF_IMMUNE_EFFECTOR_PROCESS	GOBP_POSITIVE_REGULATION_OF_IMMUNE_EFFECTOR_PROCESS	220	0.605125	1.70276	0.0121212	0.0894833	0.968	3104	tags=48%, list=20%, signal=59%
GOBP_CELL_KILLING	GOBP_CELL_KILLING	157	0.623463	1.70273	0.0060241	0.0891747	0.968	3119	tags=49%, list=20%, signal=61%
GOBP_POSITIVE_REGULATION_OF_PROTEOLYSIS_INVOLVED_IN_CELLULAR_PROTEIN_CATABOLIC_PROCESS	GOBP_POSITIVE_REGULATION_OF_PROTEOLYSIS_INVOLVED_IN_CELLULAR_PROTEIN_CATABOLIC_PROCESS	122	0.350989	1.70214	0	0.0893208	0.968	2088	tags=16%, list=14%, signal=19%
GOBP_POSITIVE_REGULATION_OF_PROTEIN_CONTAINING_COMPLEX_ASSEMBLY	GOBP_POSITIVE_REGULATION_OF_PROTEIN_CONTAINING_COMPLEX_ASSEMBLY	175	0.461287	1.702	0.00412371	0.0890909	0.968	3583	tags=34%, list=23%, signal=44%
GOBP_NATURAL_KILLER_CELL_ACTIVATION	GOBP_NATURAL_KILLER_CELL_ACTIVATION	83	0.599259	1.70188	0.00607287	0.0888458	0.968	3758	tags=46%, list=24%, signal=60%
GOBP_ENTRY_INTO_HOST	GOBP_ENTRY_INTO_HOST	139	0.494283	1.70181	0.00400802	0.0885843	0.968	2730	tags=32%, list=18%, signal=38%
GOBP_AMYLOID_BETA_METABOLIC_PROCESS	GOBP_AMYLOID_BETA_METABOLIC_PROCESS	49	0.512382	1.70098	0.00412371	0.0889441	0.97	3209	tags=37%, list=21%, signal=46%
GOBP_CALCIUM_ION_TRANSPORT	GOBP_CALCIUM_ION_TRANSPORT	365	0.51324	1.70072	0	0.088829	0.97	2998	tags=36%, list=20%, signal=44%
GOBP_POSITIVE_REGULATION_OF_VASCULAR_ENDOTHELIAL_CELL_PROLIFERATION	GOBP_POSITIVE_REGULATION_OF_VASCULAR_ENDOTHELIAL_CELL_PROLIFERATION	15	0.639875	1.69966	0.010142	0.0893742	0.971	2335	tags=27%, list=15%, signal=31%
GOBP_REGULATION_OF_FEEDING_BEHAVIOR	GOBP_REGULATION_OF_FEEDING_BEHAVIOR	23	0.682156	1.69957	0.00400802	0.0891012	0.971	1528	tags=35%, list=10%, signal=39%
GOBP_CALCIUM_ION_TRANSMEMBRANE_TRANSPORT	GOBP_CALCIUM_ION_TRANSMEMBRANE_TRANSPORT	266	0.513971	1.69938	0	0.0889483	0.971	2889	tags=35%, list=19%, signal=42%
GOBP_NEGATIVE_REGULATION_OF_PROTEIN_KINASE_B_SIGNALING	GOBP_NEGATIVE_REGULATION_OF_PROTEIN_KINASE_B_SIGNALING	37	0.538837	1.69933	0.0078125	0.0886425	0.971	4748	tags=49%, list=31%, signal=70%
GOBP_CELLULAR_RESPONSE_TO_ACID_CHEMICAL	GOBP_CELLULAR_RESPONSE_TO_ACID_CHEMICAL	72	0.500467	1.69902	0	0.0886328	0.972	4777	tags=47%, list=31%, signal=68%
GOBP_REGULATION_OF_P38MAPK_CASCADE	GOBP_REGULATION_OF_P38MAPK_CASCADE	41	0.607852	1.69882	0.00197628	0.0885375	0.972	3385	tags=51%, list=22%, signal=66%
GOBP_TISSUE_MIGRATION	GOBP_TISSUE_MIGRATION	285	0.486376	1.69872	0.00199601	0.0882877	0.972	3409	tags=39%, list=22%, signal=49%
GOBP_REGULATION_OF_INNATE_IMMUNE_RESPONSE	GOBP_REGULATION_OF_INNATE_IMMUNE_RESPONSE	202	0.557287	1.69859	0.0227743	0.0880721	0.972	3474	tags=42%, list=23%, signal=54%
GOBP_REGULATION_OF_MAST_CELL_ACTIVATION	GOBP_REGULATION_OF_MAST_CELL_ACTIVATION	41	0.644158	1.69817	0.00206186	0.0881377	0.972	3393	tags=56%, list=22%, signal=72%
GOBP_CELL_SUBSTRATE_ADHESION	GOBP_CELL_SUBSTRATE_ADHESION	340	0.508282	1.69784	0.00200401	0.0880471	0.972	3844	tags=44%, list=25%, signal=58%
GOBP_T_CELL_MIGRATION	GOBP_T_CELL_MIGRATION	60	0.666282	1.69769	0.00612245	0.0878204	0.972	3035	tags=55%, list=20%, signal=68%
GOBP_PROTEIN_KINASE_B_SIGNALING	GOBP_PROTEIN_KINASE_B_SIGNALING	174	0.520296	1.69766	0	0.087557	0.972	2761	tags=33%, list=18%, signal=39%
GOBP_NEGATIVE_REGULATION_OF_TYPE_I_INTERFERON_PRODUCTION	GOBP_NEGATIVE_REGULATION_OF_TYPE_I_INTERFERON_PRODUCTION	25	0.644872	1.69735	0.0186722	0.0874592	0.972	2263	tags=44%, list=15%, signal=52%
GOBP_LYMPHOCYTE_ACTIVATION_INVOLVED_IN_IMMUNE_RESPONSE	GOBP_LYMPHOCYTE_ACTIVATION_INVOLVED_IN_IMMUNE_RESPONSE	183	0.571986	1.69731	0.0182556	0.0872073	0.972	3314	tags=44%, list=22%, signal=56%
GOBP_REGULATION_OF_CYTOSOLIC_CALCIUM_ION_CONCENTRATION	GOBP_REGULATION_OF_CYTOSOLIC_CALCIUM_ION_CONCENTRATION	317	0.567414	1.69703	0	0.0871016	0.972	3111	tags=44%, list=20%, signal=55%
GOBP_REGULATION_OF_RHO_PROTEIN_SIGNAL_TRANSDUCTION	GOBP_REGULATION_OF_RHO_PROTEIN_SIGNAL_TRANSDUCTION	82	0.527298	1.69619	0	0.0874872	0.972	4398	tags=55%, list=29%, signal=76%
GOBP_TYPE_I_INTERFERON_PRODUCTION	GOBP_TYPE_I_INTERFERON_PRODUCTION	88	0.519317	1.69584	0.0398323	0.0874949	0.972	2766	tags=32%, list=18%, signal=39%
GOBP_NEGATIVE_REGULATION_OF_BLOOD_CIRCULATION	GOBP_NEGATIVE_REGULATION_OF_BLOOD_CIRCULATION	22	0.751271	1.69545	0.002079	0.0874571	0.972	2402	tags=59%, list=16%, signal=70%
GOBP_REGULATION_OF_SUPRAMOLECULAR_FIBER_ORGANIZATION	GOBP_REGULATION_OF_SUPRAMOLECULAR_FIBER_ORGANIZATION	332	0.431335	1.69541	0.00202429	0.0871815	0.972	4777	tags=45%, list=31%, signal=64%
GOBP_REGULATION_OF_LEUKOCYTE_DIFFERENTIATION	GOBP_REGULATION_OF_LEUKOCYTE_DIFFERENTIATION	263	0.556468	1.69539	0.0146444	0.0869094	0.972	3806	tags=51%, list=25%, signal=66%
GOBP_POSITIVE_REGULATION_OF_INTERLEUKIN_2_PRODUCTION	GOBP_POSITIVE_REGULATION_OF_INTERLEUKIN_2_PRODUCTION	33	0.730213	1.69438	0.00814664	0.0873863	0.972	1628	tags=48%, list=11%, signal=54%
GOBP_REGULATION_OF_CHOLESTEROL_EFFLUX	GOBP_REGULATION_OF_CHOLESTEROL_EFFLUX	35	0.62444	1.69359	0.00205339	0.087649	0.972	4682	tags=63%, list=30%, signal=90%
GOBP_MYELOID_LEUKOCYTE_DIFFERENTIATION	GOBP_MYELOID_LEUKOCYTE_DIFFERENTIATION	192	0.526011	1.69272	0	0.0879562	0.973	3806	tags=47%, list=25%, signal=62%
GOBP_POSITIVE_REGULATION_OF_NATURAL_KILLER_CELL_ACTIVATION	GOBP_POSITIVE_REGULATION_OF_NATURAL_KILLER_CELL_ACTIVATION	22	0.702595	1.69218	0.00798403	0.0880388	0.974	3128	tags=64%, list=20%, signal=80%
GOBP_RESPONSE_TO_INTERFERON_ALPHA	GOBP_RESPONSE_TO_INTERFERON_ALPHA	19	0.684126	1.69178	0.0122699	0.0880581	0.975	2982	tags=47%, list=19%, signal=59%
GOBP_REGULATION_OF_LYMPHOCYTE_DIFFERENTIATION	GOBP_REGULATION_OF_LYMPHOCYTE_DIFFERENTIATION	169	0.580974	1.6915	0.0181818	0.0880326	0.975	3090	tags=47%, list=20%, signal=58%
GOBP_LEUKOCYTE_MEDIATED_CYTOTOXICITY	GOBP_LEUKOCYTE_MEDIATED_CYTOTOXICITY	112	0.647704	1.69104	0.00795229	0.0880837	0.975	3098	tags=54%, list=20%, signal=67%
GOBP_NEGATIVE_REGULATION_OF_PRODUCTION_OF_MOLECULAR_MEDIATOR_OF_IMMUNE_RESPONSE	GOBP_NEGATIVE_REGULATION_OF_PRODUCTION_OF_MOLECULAR_MEDIATOR_OF_IMMUNE_RESPONSE	38	0.733561	1.6907	0.006	0.0881244	0.975	2795	tags=66%, list=18%, signal=80%
GOBP_MEMBRANE_PROTEIN_PROTEOLYSIS	GOBP_MEMBRANE_PROTEIN_PROTEOLYSIS	56	0.514576	1.69055	0.00603622	0.0879594	0.975	3127	tags=32%, list=20%, signal=40%
GOBP_NEGATIVE_REGULATION_OF_LYMPHOCYTE_MEDIATED_IMMUNITY	GOBP_NEGATIVE_REGULATION_OF_LYMPHOCYTE_MEDIATED_IMMUNITY	50	0.669843	1.69039	0.010101	0.0878338	0.975	3459	tags=62%, list=23%, signal=80%
GOBP_ACTIN_CYTOSKELETON_REORGANIZATION	GOBP_ACTIN_CYTOSKELETON_REORGANIZATION	105	0.492255	1.69023	0.0126316	0.087662	0.975	3419	tags=36%, list=22%, signal=46%
GOBP_ANTIGEN_PROCESSING_AND_PRESENTATION_OF_PEPTIDE_ANTIGEN_VIA_MHC_CLASS_I	GOBP_ANTIGEN_PROCESSING_AND_PRESENTATION_OF_PEPTIDE_ANTIGEN_VIA_MHC_CLASS_I	27	0.608346	1.68981	0.025641	0.0876936	0.975	4895	tags=74%, list=32%, signal=109%
GOBP_POSITIVE_REGULATION_OF_ADAPTIVE_IMMUNE_RESPONSE	GOBP_POSITIVE_REGULATION_OF_ADAPTIVE_IMMUNE_RESPONSE	98	0.650626	1.6896	0.00826446	0.0875897	0.975	2642	tags=52%, list=17%, signal=62%
GOBP_NEGATIVE_REGULATION_OF_VASCULATURE_DEVELOPMENT	GOBP_NEGATIVE_REGULATION_OF_VASCULATURE_DEVELOPMENT	89	0.561624	1.68925	0.0019802	0.0875688	0.976	2217	tags=36%, list=14%, signal=42%
GOBP_POSITIVE_REGULATION_OF_CELL_MATRIX_ADHESION	GOBP_POSITIVE_REGULATION_OF_CELL_MATRIX_ADHESION	54	0.555415	1.68828	0.00398406	0.0879327	0.976	3702	tags=44%, list=24%, signal=58%
GOBP_REGULATION_OF_DNA_BINDING_TRANSCRIPTION_FACTOR_ACTIVITY	GOBP_REGULATION_OF_DNA_BINDING_TRANSCRIPTION_FACTOR_ACTIVITY	395	0.445934	1.68824	0	0.0876863	0.976	3569	tags=35%, list=23%, signal=44%
GOBP_INTERLEUKIN_10_PRODUCTION	GOBP_INTERLEUKIN_10_PRODUCTION	54	0.70065	1.68805	0.00614754	0.0875149	0.976	2098	tags=52%, list=14%, signal=60%
GOBP_REGULATION_OF_MACROPHAGE_MIGRATION	GOBP_REGULATION_OF_MACROPHAGE_MIGRATION	35	0.701635	1.68805	0.00206612	0.0872441	0.976	2927	tags=54%, list=19%, signal=67%
GOBP_REGULATION_OF_T_CELL_MIGRATION	GOBP_REGULATION_OF_T_CELL_MIGRATION	40	0.676237	1.68792	0.0104167	0.0870931	0.976	3035	tags=52%, list=20%, signal=65%
GOBP_P38MAPK_CASCADE	GOBP_P38MAPK_CASCADE	50	0.564119	1.68776	0.00403226	0.0869674	0.976	3999	tags=52%, list=26%, signal=70%
GOBP_POSITIVE_REGULATION_OF_MAP_KINASE_ACTIVITY	GOBP_POSITIVE_REGULATION_OF_MAP_KINASE_ACTIVITY	112	0.555624	1.6875	0	0.0868504	0.976	3377	tags=46%, list=22%, signal=58%
GOBP_INOSITOL_LIPID_MEDIATED_SIGNALING	GOBP_INOSITOL_LIPID_MEDIATED_SIGNALING	164	0.549406	1.68724	0	0.0867999	0.976	3685	tags=48%, list=24%, signal=62%
GOBP_SPROUTING_ANGIOGENESIS	GOBP_SPROUTING_ANGIOGENESIS	117	0.578203	1.68722	0.00592885	0.0865388	0.976	3297	tags=45%, list=21%, signal=57%
GOBP_REGULATION_OF_TOLL_LIKE_RECEPTOR_SIGNALING_PATHWAY	GOBP_REGULATION_OF_TOLL_LIKE_RECEPTOR_SIGNALING_PATHWAY	65	0.589771	1.68696	0.0143443	0.0865179	0.976	3109	tags=43%, list=20%, signal=54%
GOBP_POSITIVE_REGULATION_OF_DNA_BINDING_TRANSCRIPTION_FACTOR_ACTIVITY	GOBP_POSITIVE_REGULATION_OF_DNA_BINDING_TRANSCRIPTION_FACTOR_ACTIVITY	247	0.473667	1.6867	0	0.0864625	0.976	3416	tags=34%, list=22%, signal=43%
GOBP_NEGATIVE_REGULATION_OF_LEUKOCYTE_CELL_CELL_ADHESION	GOBP_NEGATIVE_REGULATION_OF_LEUKOCYTE_CELL_CELL_ADHESION	118	0.599556	1.68666	0.0122951	0.0862281	0.976	2918	tags=46%, list=19%, signal=56%
GOBP_REGULATION_OF_LEUKOCYTE_CHEMOTAXIS	GOBP_REGULATION_OF_LEUKOCYTE_CHEMOTAXIS	105	0.622569	1.68647	0	0.0860904	0.976	2953	tags=50%, list=19%, signal=62%
GOBP_NEGATIVE_REGULATION_OF_NF_KAPPAB_TRANSCRIPTION_FACTOR_ACTIVITY	GOBP_NEGATIVE_REGULATION_OF_NF_KAPPAB_TRANSCRIPTION_FACTOR_ACTIVITY	76	0.518472	1.68629	0.00828157	0.0859768	0.976	4405	tags=46%, list=29%, signal=64%
GOBP_B_CELL_MEDIATED_IMMUNITY	GOBP_B_CELL_MEDIATED_IMMUNITY	128	0.610709	1.68491	0.0139442	0.0866619	0.976	3132	tags=52%, list=20%, signal=64%
GOBP_T_CELL_ACTIVATION_INVOLVED_IN_IMMUNE_RESPONSE	GOBP_T_CELL_ACTIVATION_INVOLVED_IN_IMMUNE_RESPONSE	107	0.59824	1.68475	0.00621118	0.0865445	0.976	3795	tags=52%, list=25%, signal=69%
GOBP_POSITIVE_REGULATION_OF_PHOSPHOLIPASE_ACTIVITY	GOBP_POSITIVE_REGULATION_OF_PHOSPHOLIPASE_ACTIVITY	54	0.63396	1.68423	0.00211416	0.0867058	0.976	2901	tags=50%, list=19%, signal=61%
GOBP_T_CELL_CYTOKINE_PRODUCTION	GOBP_T_CELL_CYTOKINE_PRODUCTION	37	0.695187	1.68393	0.00819672	0.0866562	0.976	2705	tags=54%, list=18%, signal=65%
GOBP_REGULATION_OF_ESTABLISHMENT_OR_MAINTENANCE_OF_CELL_POLARITY	GOBP_REGULATION_OF_ESTABLISHMENT_OR_MAINTENANCE_OF_CELL_POLARITY	22	0.576541	1.68391	0.00204918	0.0864079	0.976	2452	tags=32%, list=16%, signal=38%
GOBP_NEGATIVE_REGULATION_OF_NUCLEOTIDE_METABOLIC_PROCESS	GOBP_NEGATIVE_REGULATION_OF_NUCLEOTIDE_METABOLIC_PROCESS	19	0.602065	1.68382	0.0103093	0.0861897	0.976	3047	tags=26%, list=20%, signal=33%
GOBP_POSITIVE_REGULATION_OF_KINASE_ACTIVITY	GOBP_POSITIVE_REGULATION_OF_KINASE_ACTIVITY	436	0.455295	1.68364	0	0.0860914	0.976	3795	tags=38%, list=25%, signal=49%
GOBP_NEGATIVE_REGULATION_OF_CELL_CELL_ADHESION	GOBP_NEGATIVE_REGULATION_OF_CELL_CELL_ADHESION	170	0.543928	1.68325	0.00826446	0.086105	0.976	3187	tags=41%, list=21%, signal=51%
GOBP_PHOSPHATIDYLINOSITOL_3_KINASE_SIGNALING	GOBP_PHOSPHATIDYLINOSITOL_3_KINASE_SIGNALING	129	0.568436	1.68206	0	0.0867865	0.977	3807	tags=50%, list=25%, signal=66%
GOBP_ACTIN_FILAMENT_BUNDLE_ORGANIZATION	GOBP_ACTIN_FILAMENT_BUNDLE_ORGANIZATION	148	0.449083	1.68202	0.00589391	0.0865653	0.977	4437	tags=43%, list=29%, signal=59%
GOBP_REGULATION_OF_VIRAL_PROCESS	GOBP_REGULATION_OF_VIRAL_PROCESS	141	0.451868	1.68157	0.0246407	0.086654	0.977	2795	tags=27%, list=18%, signal=33%
GOBP_NEGATIVE_REGULATION_OF_INTRACELLULAR_SIGNAL_TRANSDUCTION	GOBP_NEGATIVE_REGULATION_OF_INTRACELLULAR_SIGNAL_TRANSDUCTION	449	0.404801	1.68147	0	0.0864805	0.977	4006	tags=35%, list=26%, signal=46%
GOBP_AMYLOID_BETA_FORMATION	GOBP_AMYLOID_BETA_FORMATION	40	0.519076	1.68122	0.00206186	0.08642	0.977	3209	tags=38%, list=21%, signal=47%
GOBP_REGULATION_OF_PHOSPHOLIPASE_ACTIVITY	GOBP_REGULATION_OF_PHOSPHOLIPASE_ACTIVITY	64	0.616519	1.68054	0	0.0867178	0.977	3093	tags=50%, list=20%, signal=62%
GOBP_INTERLEUKIN_6_MEDIATED_SIGNALING_PATHWAY	GOBP_INTERLEUKIN_6_MEDIATED_SIGNALING_PATHWAY	18	0.645815	1.68053	0.0040404	0.0864635	0.977	2098	tags=39%, list=14%, signal=45%
GOBP_POSITIVE_REGULATION_OF_INTERLEUKIN_6_PRODUCTION	GOBP_POSITIVE_REGULATION_OF_INTERLEUKIN_6_PRODUCTION	88	0.604239	1.68007	0.004158	0.0865628	0.977	3098	tags=50%, list=20%, signal=62%
GOBP_REGULATION_OF_B_CELL_MEDIATED_IMMUNITY	GOBP_REGULATION_OF_B_CELL_MEDIATED_IMMUNITY	53	0.652644	1.6793	0.0118812	0.0868705	0.978	2538	tags=51%, list=17%, signal=61%
GOBP_NEGATIVE_REGULATION_OF_CELL_ACTIVATION	GOBP_NEGATIVE_REGULATION_OF_CELL_ACTIVATION	190	0.593511	1.67903	0.00816326	0.0867813	0.978	3111	tags=52%, list=20%, signal=65%
GOBP_NEGATIVE_REGULATION_OF_CELL_ADHESION	GOBP_NEGATIVE_REGULATION_OF_CELL_ADHESION	262	0.509352	1.67864	0.00614754	0.0867987	0.978	4036	tags=46%, list=26%, signal=61%
GOBP_HOMEOSTASIS_OF_NUMBER_OF_CELLS	GOBP_HOMEOSTASIS_OF_NUMBER_OF_CELLS	263	0.450967	1.67836	0.0122699	0.0867347	0.979	3091	tags=29%, list=20%, signal=36%
GOBP_REGULATION_OF_RESPONSE_TO_OXIDATIVE_STRESS	GOBP_REGULATION_OF_RESPONSE_TO_OXIDATIVE_STRESS	81	0.471831	1.67756	0.00393701	0.0871871	0.979	2173	tags=23%, list=14%, signal=27%
GOBP_CELL_MATRIX_ADHESION	GOBP_CELL_MATRIX_ADHESION	219	0.511429	1.67755	0.00198807	0.0869365	0.979	3741	tags=42%, list=24%, signal=55%
GOBP_NEGATIVE_REGULATION_OF_CELL_JUNCTION_ASSEMBLY	GOBP_NEGATIVE_REGULATION_OF_CELL_JUNCTION_ASSEMBLY	29	0.633279	1.6771	0.00596422	0.0869631	0.979	1988	tags=38%, list=13%, signal=43%
GOBP_POSITIVE_REGULATION_OF_CELLULAR_COMPONENT_BIOGENESIS	GOBP_POSITIVE_REGULATION_OF_CELLULAR_COMPONENT_BIOGENESIS	446	0.429029	1.6767	0	0.0869926	0.979	3794	tags=33%, list=25%, signal=43%
GOBP_ENDOCARDIAL_CUSHION_DEVELOPMENT	GOBP_ENDOCARDIAL_CUSHION_DEVELOPMENT	49	0.636991	1.67576	0.00411523	0.0874328	0.979	4533	tags=67%, list=30%, signal=95%
GOBP_REGULATION_OF_ACTIN_FILAMENT_BASED_PROCESS	GOBP_REGULATION_OF_ACTIN_FILAMENT_BASED_PROCESS	355	0.456788	1.67506	0	0.0878776	0.979	3627	tags=37%, list=24%, signal=47%
GOBP_MAST_CELL_ACTIVATION	GOBP_MAST_CELL_ACTIVATION	65	0.61512	1.6747	0.00996016	0.0879217	0.979	3393	tags=54%, list=22%, signal=69%
GOBP_REGULATION_OF_ENDOCYTOSIS	GOBP_REGULATION_OF_ENDOCYTOSIS	199	0.449186	1.67457	0	0.0878384	0.979	4396	tags=39%, list=29%, signal=54%
GOBP_RESPONSE_TO_TRANSFORMING_GROWTH_FACTOR_BETA	GOBP_RESPONSE_TO_TRANSFORMING_GROWTH_FACTOR_BETA	237	0.477703	1.67426	0.00603622	0.0878489	0.979	3824	tags=36%, list=25%, signal=48%
GOBP_ALPHA_BETA_T_CELL_DIFFERENTIATION	GOBP_ALPHA_BETA_T_CELL_DIFFERENTIATION	104	0.629478	1.67405	0.01417	0.0877614	0.979	3306	tags=55%, list=22%, signal=69%
GOBP_RESPONSE_TO_ISCHEMIA	GOBP_RESPONSE_TO_ISCHEMIA	48	0.531678	1.67392	0.004	0.0876052	0.979	2949	tags=35%, list=19%, signal=44%
GOBP_POSITIVE_REGULATION_OF_HEMOPOIESIS	GOBP_POSITIVE_REGULATION_OF_HEMOPOIESIS	148	0.565685	1.67388	0.014433	0.0873803	0.979	3806	tags=55%, list=25%, signal=72%
GOBP_POSITIVE_REGULATION_OF_LYMPHOCYTE_DIFFERENTIATION	GOBP_POSITIVE_REGULATION_OF_LYMPHOCYTE_DIFFERENTIATION	99	0.615757	1.67346	0.0145833	0.0874222	0.98	3090	tags=51%, list=20%, signal=63%
GOBP_LYMPHOCYTE_MIGRATION	GOBP_LYMPHOCYTE_MIGRATION	94	0.668614	1.67299	0.0124224	0.0875332	0.98	3035	tags=56%, list=20%, signal=70%
GOBP_REGULATION_OF_CELL_KILLING	GOBP_REGULATION_OF_CELL_KILLING	90	0.686026	1.67295	0.006	0.0873203	0.98	3119	tags=63%, list=20%, signal=79%
GOBP_MYOBLAST_FUSION	GOBP_MYOBLAST_FUSION	40	0.574728	1.67254	0	0.0874018	0.98	3195	tags=45%, list=21%, signal=57%
GOBP_POSITIVE_REGULATION_OF_CYTOKINE_PRODUCTION_INVOLVED_IN_INFLAMMATORY_RESPONSE	GOBP_POSITIVE_REGULATION_OF_CYTOKINE_PRODUCTION_INVOLVED_IN_INFLAMMATORY_RESPONSE	22	0.690312	1.67195	0.010395	0.0876005	0.981	3098	tags=59%, list=20%, signal=74%
GOBP_POSITIVE_REGULATION_OF_CELLULAR_PROTEIN_CATABOLIC_PROCESS	GOBP_POSITIVE_REGULATION_OF_CELLULAR_PROTEIN_CATABOLIC_PROCESS	143	0.360734	1.67193	0.00819672	0.0873788	0.981	3990	tags=28%, list=26%, signal=37%
GOBP_RESPONSE_TO_TUMOR_NECROSIS_FACTOR	GOBP_RESPONSE_TO_TUMOR_NECROSIS_FACTOR	198	0.510264	1.67103	0.0102249	0.0878381	0.982	2822	tags=35%, list=18%, signal=42%
GOBP_POSITIVE_REGULATION_OF_PROTEIN_SERINE_THREONINE_KINASE_ACTIVITY	GOBP_POSITIVE_REGULATION_OF_PROTEIN_SERINE_THREONINE_KINASE_ACTIVITY	192	0.468821	1.67102	0.00199601	0.0875981	0.982	3409	tags=35%, list=22%, signal=45%
GOBP_ACTIN_FILAMENT_POLYMERIZATION	GOBP_ACTIN_FILAMENT_POLYMERIZATION	144	0.472867	1.67049	0.00419287	0.0878092	0.982	2920	tags=35%, list=19%, signal=42%
GOBP_TOLL_LIKE_RECEPTOR_9_SIGNALING_PATHWAY	GOBP_TOLL_LIKE_RECEPTOR_9_SIGNALING_PATHWAY	18	0.728159	1.67033	0.0101215	0.08768	0.982	1477	tags=33%, list=10%, signal=37%
GOBP_POSITIVE_REGULATION_OF_PROTEIN_KINASE_ACTIVITY	GOBP_POSITIVE_REGULATION_OF_PROTEIN_KINASE_ACTIVITY	361	0.447988	1.66976	0	0.0879552	0.982	3723	tags=37%, list=24%, signal=48%
GOBP_NEGATIVE_REGULATION_OF_MACROAUTOPHAGY	GOBP_NEGATIVE_REGULATION_OF_MACROAUTOPHAGY	33	0.400848	1.66947	0.027027	0.0879605	0.982	2293	tags=15%, list=15%, signal=18%
GOBP_T_CELL_APOPTOTIC_PROCESS	GOBP_T_CELL_APOPTOTIC_PROCESS	47	0.593365	1.66947	0.0169133	0.0877355	0.982	3519	tags=45%, list=23%, signal=58%
GOBP_CELLULAR_RESPONSE_TO_LIPOPROTEIN_PARTICLE_STIMULUS	GOBP_CELLULAR_RESPONSE_TO_LIPOPROTEIN_PARTICLE_STIMULUS	30	0.648331	1.66936	0.0143443	0.0875974	0.982	3297	tags=53%, list=21%, signal=68%
GOBP_POSITIVE_REGULATION_OF_MYELINATION	GOBP_POSITIVE_REGULATION_OF_MYELINATION	15	0.718446	1.6693	0.00192678	0.0873843	0.982	1929	tags=47%, list=13%, signal=53%
GOBP_NEGATIVE_REGULATION_OF_PROTEIN_SERINE_THREONINE_KINASE_ACTIVITY	GOBP_NEGATIVE_REGULATION_OF_PROTEIN_SERINE_THREONINE_KINASE_ACTIVITY	109	0.483958	1.66885	0.00622407	0.0874477	0.982	4729	tags=54%, list=31%, signal=78%
GOBP_POSITIVE_REGULATION_OF_MACROPHAGE_MIGRATION	GOBP_POSITIVE_REGULATION_OF_MACROPHAGE_MIGRATION	23	0.710346	1.66864	0.00804829	0.0874136	0.982	3273	tags=61%, list=21%, signal=77%
GOBP_MAST_CELL_ACTIVATION_INVOLVED_IN_IMMUNE_RESPONSE	GOBP_MAST_CELL_ACTIVATION_INVOLVED_IN_IMMUNE_RESPONSE	52	0.595944	1.66859	0.0101626	0.0872004	0.982	3104	tags=48%, list=20%, signal=60%
GOBP_REGULATION_OF_T_CELL_DIFFERENTIATION_IN_THYMUS	GOBP_REGULATION_OF_T_CELL_DIFFERENTIATION_IN_THYMUS	23	0.659407	1.66856	0.00408163	0.086989	0.982	2776	tags=43%, list=18%, signal=53%
GOBP_REGULATION_OF_MYOBLAST_DIFFERENTIATION	GOBP_REGULATION_OF_MYOBLAST_DIFFERENTIATION	50	0.577891	1.66846	0.00197628	0.0868358	0.982	2895	tags=42%, list=19%, signal=52%
GOBP_CELLULAR_RESPONSE_TO_MECHANICAL_STIMULUS	GOBP_CELLULAR_RESPONSE_TO_MECHANICAL_STIMULUS	68	0.535633	1.6678	0.0160966	0.0870659	0.982	3098	tags=43%, list=20%, signal=53%
GOBP_POSITIVE_REGULATION_OF_NITRIC_OXIDE_METABOLIC_PROCESS	GOBP_POSITIVE_REGULATION_OF_NITRIC_OXIDE_METABOLIC_PROCESS	38	0.628791	1.66725	0.00603622	0.0872877	0.982	3294	tags=55%, list=21%, signal=70%
GOBP_BIOLOGICAL_PROCESS_INVOLVED_IN_SYMBIOTIC_INTERACTION	GOBP_BIOLOGICAL_PROCESS_INVOLVED_IN_SYMBIOTIC_INTERACTION	256	0.432591	1.66629	0.00198413	0.0877604	0.983	3171	tags=28%, list=21%, signal=34%
GOBP_INTERLEUKIN_5_PRODUCTION	GOBP_INTERLEUKIN_5_PRODUCTION	18	0.692273	1.66549	0.00804829	0.0881886	0.984	1996	tags=44%, list=13%, signal=51%
GOBP_RESPONSE_TO_INTERLEUKIN_4	GOBP_RESPONSE_TO_INTERLEUKIN_4	31	0.585004	1.66542	0.0182186	0.0880124	0.984	1970	tags=32%, list=13%, signal=37%
GOBP_CELL_SUBSTRATE_JUNCTION_ORGANIZATION	GOBP_CELL_SUBSTRATE_JUNCTION_ORGANIZATION	96	0.484118	1.66459	0.0176817	0.0883837	0.984	4817	tags=48%, list=31%, signal=69%
GOBP_REGULATION_OF_PROTEIN_LOCALIZATION_TO_PLASMA_MEMBRANE	GOBP_REGULATION_OF_PROTEIN_LOCALIZATION_TO_PLASMA_MEMBRANE	96	0.452255	1.66456	0.00408998	0.0881749	0.984	3301	tags=32%, list=21%, signal=41%
GOBP_REGULATION_OF_CALCIUM_ION_TRANSMEMBRANE_TRANSPORT	GOBP_REGULATION_OF_CALCIUM_ION_TRANSMEMBRANE_TRANSPORT	132	0.537701	1.66439	0	0.0880225	0.984	2889	tags=40%, list=19%, signal=49%
GOBP_REGULATION_OF_DEFENSE_RESPONSE_TO_VIRUS	GOBP_REGULATION_OF_DEFENSE_RESPONSE_TO_VIRUS	62	0.564485	1.66421	0.0265306	0.0879616	0.985	4606	tags=52%, list=30%, signal=73%
GOBP_REGULATION_OF_CD4_POSITIVE_ALPHA_BETA_T_CELL_ACTIVATION	GOBP_REGULATION_OF_CD4_POSITIVE_ALPHA_BETA_T_CELL_ACTIVATION	56	0.674703	1.664	0.01417	0.0878935	0.985	3090	tags=57%, list=20%, signal=71%
GOBP_MYELOID_LEUKOCYTE_MIGRATION	GOBP_MYELOID_LEUKOCYTE_MIGRATION	198	0.606947	1.66371	0.00603622	0.0878803	0.985	2998	tags=51%, list=20%, signal=63%
GOBP_GRANULOCYTE_ACTIVATION	GOBP_GRANULOCYTE_ACTIVATION	41	0.691622	1.66337	0.00603622	0.0879349	0.985	3098	tags=66%, list=20%, signal=82%
GOBP_REGULATION_OF_LEUKOCYTE_ADHESION_TO_VASCULAR_ENDOTHELIAL_CELL	GOBP_REGULATION_OF_LEUKOCYTE_ADHESION_TO_VASCULAR_ENDOTHELIAL_CELL	29	0.713065	1.66263	0.00790514	0.0883607	0.985	2524	tags=59%, list=16%, signal=70%
GOBP_REGULATION_OF_INFLAMMATORY_RESPONSE_TO_ANTIGENIC_STIMULUS	GOBP_REGULATION_OF_INFLAMMATORY_RESPONSE_TO_ANTIGENIC_STIMULUS	36	0.717194	1.6626	0.00205761	0.0881539	0.985	2249	tags=50%, list=15%, signal=58%
GOBP_TUMOR_NECROSIS_FACTOR_MEDIATED_SIGNALING_PATHWAY	GOBP_TUMOR_NECROSIS_FACTOR_MEDIATED_SIGNALING_PATHWAY	91	0.478527	1.6625	0.0203666	0.087993	0.985	2422	tags=30%, list=16%, signal=35%
GOBP_PROTEIN_AUTOPHOSPHORYLATION	GOBP_PROTEIN_AUTOPHOSPHORYLATION	216	0.393613	1.66249	0.0101626	0.0877722	0.985	3759	tags=33%, list=24%, signal=43%
GOBP_FC_GAMMA_RECEPTOR_SIGNALING_PATHWAY	GOBP_FC_GAMMA_RECEPTOR_SIGNALING_PATHWAY	28	0.627235	1.66221	0.0167715	0.0877495	0.985	2945	tags=50%, list=19%, signal=62%
GOBP_PROTEIN_LOCALIZATION_TO_CELL_SURFACE	GOBP_PROTEIN_LOCALIZATION_TO_CELL_SURFACE	61	0.523059	1.66214	0.00817996	0.0875819	0.985	4781	tags=48%, list=31%, signal=69%
GOBP_ACTIVATION_OF_PHOSPHOLIPASE_C_ACTIVITY	GOBP_ACTIVATION_OF_PHOSPHOLIPASE_C_ACTIVITY	30	0.674901	1.66161	0.00420168	0.0877766	0.985	2675	tags=57%, list=17%, signal=68%
GOBP_CELLULAR_RESPONSE_TO_EXOGENOUS_DSRNA	GOBP_CELLULAR_RESPONSE_TO_EXOGENOUS_DSRNA	15	0.65132	1.66104	0.0219561	0.0878485	0.985	2323	tags=33%, list=15%, signal=39%
GOBP_POSITIVE_REGULATION_OF_PROTEIN_POLYMERIZATION	GOBP_POSITIVE_REGULATION_OF_PROTEIN_POLYMERIZATION	85	0.458626	1.66101	0.0020284	0.0876478	0.985	2739	tags=27%, list=18%, signal=33%
GOBP_LEUKOCYTE_HOMEOSTASIS	GOBP_LEUKOCYTE_HOMEOSTASIS	86	0.585879	1.661	0.0144628	0.0874314	0.985	2373	tags=40%, list=15%, signal=46%
GOBP_STRESS_ACTIVATED_PROTEIN_KINASE_SIGNALING_CASCADE	GOBP_STRESS_ACTIVATED_PROTEIN_KINASE_SIGNALING_CASCADE	235	0.455694	1.66065	0.00198807	0.0874316	0.985	3437	tags=34%, list=22%, signal=43%
GOBP_CARDIAC_SEPTUM_MORPHOGENESIS	GOBP_CARDIAC_SEPTUM_MORPHOGENESIS	67	0.583614	1.65958	0.0163265	0.0879241	0.985	3596	tags=52%, list=23%, signal=68%
GOBP_HEART_VALVE_MORPHOGENESIS	GOBP_HEART_VALVE_MORPHOGENESIS	53	0.598272	1.65948	0.00406504	0.0878021	0.985	3832	tags=55%, list=25%, signal=73%
GOBP_MEMBRANE_RAFT_ORGANIZATION	GOBP_MEMBRANE_RAFT_ORGANIZATION	23	0.604907	1.65906	0.0121704	0.087823	0.985	4384	tags=65%, list=29%, signal=91%
GOBP_OSTEOCLAST_DIFFERENTIATION	GOBP_OSTEOCLAST_DIFFERENTIATION	88	0.556356	1.65829	0.00612245	0.0882211	0.986	3880	tags=51%, list=25%, signal=68%
GOBP_REGULATION_OF_LEUKOCYTE_MEDIATED_CYTOTOXICITY	GOBP_REGULATION_OF_LEUKOCYTE_MEDIATED_CYTOTOXICITY	72	0.703607	1.65663	0.008	0.089342	0.988	1916	tags=51%, list=12%, signal=58%
GOBP_ESTABLISHMENT_OF_ENDOTHELIAL_BARRIER	GOBP_ESTABLISHMENT_OF_ENDOTHELIAL_BARRIER	51	0.520361	1.65623	0.0203666	0.0894562	0.988	4088	tags=51%, list=27%, signal=69%
GOBP_LEUKOCYTE_APOPTOTIC_PROCESS	GOBP_LEUKOCYTE_APOPTOTIC_PROCESS	102	0.557755	1.65594	0.0144033	0.0894327	0.988	3796	tags=49%, list=25%, signal=65%
GOBP_CORONARY_VASCULATURE_DEVELOPMENT	GOBP_CORONARY_VASCULATURE_DEVELOPMENT	43	0.599303	1.65577	0.00809717	0.0893273	0.988	3440	tags=51%, list=22%, signal=66%
GOBP_NEGATIVE_REGULATION_OF_PROTEIN_MODIFICATION_PROCESS	GOBP_NEGATIVE_REGULATION_OF_PROTEIN_MODIFICATION_PROCESS	450	0.374015	1.65547	0	0.0893264	0.988	4678	tags=38%, list=30%, signal=54%
GOBP_INTERFERON_GAMMA_PRODUCTION	GOBP_INTERFERON_GAMMA_PRODUCTION	103	0.686803	1.65427	0.00817996	0.0899955	0.988	2192	tags=56%, list=14%, signal=65%
GOBP_ENDOCARDIAL_CUSHION_MORPHOGENESIS	GOBP_ENDOCARDIAL_CUSHION_MORPHOGENESIS	40	0.640261	1.65412	0.00613497	0.0898879	0.988	4533	tags=68%, list=30%, signal=96%
GOBP_POSITIVE_REGULATION_OF_CHOLESTEROL_EFFLUX	GOBP_POSITIVE_REGULATION_OF_CHOLESTEROL_EFFLUX	25	0.641349	1.65402	0.00202429	0.0897731	0.988	4501	tags=64%, list=29%, signal=90%
GOBP_REGULATION_OF_NITRIC_OXIDE_SYNTHASE_ACTIVITY	GOBP_REGULATION_OF_NITRIC_OXIDE_SYNTHASE_ACTIVITY	35	0.58441	1.65399	0.00801603	0.089598	0.988	2703	tags=40%, list=18%, signal=48%
GOBP_REGULATION_OF_MAST_CELL_ACTIVATION_INVOLVED_IN_IMMUNE_RESPONSE	GOBP_REGULATION_OF_MAST_CELL_ACTIVATION_INVOLVED_IN_IMMUNE_RESPONSE	32	0.6115	1.65397	0.0104384	0.0893988	0.988	3950	tags=56%, list=26%, signal=76%
GOBP_POSITIVE_REGULATION_OF_PROTEIN_DEPHOSPHORYLATION	GOBP_POSITIVE_REGULATION_OF_PROTEIN_DEPHOSPHORYLATION	41	0.535541	1.65368	0.0165631	0.0893941	0.988	3538	tags=44%, list=23%, signal=57%
GOBP_NEGATIVE_REGULATION_OF_OSTEOCLAST_DIFFERENTIATION	GOBP_NEGATIVE_REGULATION_OF_OSTEOCLAST_DIFFERENTIATION	27	0.650144	1.65362	0.0162602	0.0892157	0.988	3036	tags=48%, list=20%, signal=60%
GOBP_LYMPHOCYTE_HOMEOSTASIS	GOBP_LYMPHOCYTE_HOMEOSTASIS	63	0.607568	1.65347	0.0207039	0.0891275	0.988	2171	tags=37%, list=14%, signal=42%
GOBP_REACTIVE_OXYGEN_SPECIES_METABOLIC_PROCESS	GOBP_REACTIVE_OXYGEN_SPECIES_METABOLIC_PROCESS	197	0.468679	1.65312	0.00607287	0.0891676	0.988	3295	tags=36%, list=21%, signal=45%
GOBP_N_GLYCAN_PROCESSING	GOBP_N_GLYCAN_PROCESSING	18	0.624342	1.65281	0.0122449	0.089184	0.988	2318	tags=28%, list=15%, signal=33%
GOBP_POSITIVE_REGULATION_OF_INTERLEUKIN_10_PRODUCTION	GOBP_POSITIVE_REGULATION_OF_INTERLEUKIN_10_PRODUCTION	38	0.71682	1.65265	0.00614754	0.089098	0.988	2098	tags=53%, list=14%, signal=61%
GOBP_CELL_MIGRATION_INVOLVED_IN_SPROUTING_ANGIOGENESIS	GOBP_CELL_MIGRATION_INVOLVED_IN_SPROUTING_ANGIOGENESIS	51	0.574469	1.65233	0.020284	0.0891906	0.988	3288	tags=43%, list=21%, signal=55%
GOBP_PROTEIN_DESTABILIZATION	GOBP_PROTEIN_DESTABILIZATION	40	0.418622	1.65192	0.0192308	0.0893411	0.988	4497	tags=43%, list=29%, signal=60%
GOBP_CD4_POSITIVE_ALPHA_BETA_T_CELL_ACTIVATION	GOBP_CD4_POSITIVE_ALPHA_BETA_T_CELL_ACTIVATION	90	0.627813	1.65183	0.0141988	0.0891537	0.988	3306	tags=54%, list=22%, signal=69%
GOBP_MEMBRANE_PROTEIN_ECTODOMAIN_PROTEOLYSIS	GOBP_MEMBRANE_PROTEIN_ECTODOMAIN_PROTEOLYSIS	45	0.537057	1.65174	0.0204082	0.0890109	0.988	3127	tags=33%, list=20%, signal=42%
GOBP_SEQUESTERING_OF_CALCIUM_ION	GOBP_SEQUESTERING_OF_CALCIUM_ION	113	0.573052	1.65115	0.00386847	0.0892518	0.988	2889	tags=45%, list=19%, signal=55%
GOBP_PHAGOCYTOSIS_RECOGNITION	GOBP_PHAGOCYTOSIS_RECOGNITION	25	0.723331	1.65082	0	0.0893377	0.988	1869	tags=44%, list=12%, signal=50%
GOBP_REGULATION_OF_MAP_KINASE_ACTIVITY	GOBP_REGULATION_OF_MAP_KINASE_ACTIVITY	179	0.493982	1.65079	0.0039604	0.0891395	0.988	3441	tags=40%, list=22%, signal=51%
GOBP_MAINTENANCE_OF_LOCATION_IN_CELL	GOBP_MAINTENANCE_OF_LOCATION_IN_CELL	198	0.481465	1.64988	0	0.089632	0.988	3737	tags=39%, list=24%, signal=51%
GOBP_DIVALENT_INORGANIC_CATION_HOMEOSTASIS	GOBP_DIVALENT_INORGANIC_CATION_HOMEOSTASIS	455	0.517608	1.64984	0	0.0894524	0.988	3162	tags=38%, list=21%, signal=47%
GOBP_POSITIVE_REGULATION_OF_MACROPHAGE_CHEMOTAXIS	GOBP_POSITIVE_REGULATION_OF_MACROPHAGE_CHEMOTAXIS	17	0.670914	1.64913	0.0162272	0.089833	0.988	3273	tags=59%, list=21%, signal=75%
GOBP_POSITIVE_REGULATION_OF_SUPRAMOLECULAR_FIBER_ORGANIZATION	GOBP_POSITIVE_REGULATION_OF_SUPRAMOLECULAR_FIBER_ORGANIZATION	160	0.458092	1.64911	0	0.0896433	0.988	4970	tags=46%, list=32%, signal=68%
GOBP_POSITIVE_REGULATION_OF_SMALL_GTPASE_MEDIATED_SIGNAL_TRANSDUCTION	GOBP_POSITIVE_REGULATION_OF_SMALL_GTPASE_MEDIATED_SIGNAL_TRANSDUCTION	66	0.562168	1.64907	0.00595238	0.0894599	0.988	3419	tags=47%, list=22%, signal=60%
GOBP_REGULATION_OF_MONOOXYGENASE_ACTIVITY	GOBP_REGULATION_OF_MONOOXYGENASE_ACTIVITY	48	0.570428	1.64904	0	0.0892682	0.988	2783	tags=40%, list=18%, signal=48%
GOBP_POSITIVE_REGULATION_OF_PROTEIN_KINASE_B_SIGNALING	GOBP_POSITIVE_REGULATION_OF_PROTEIN_KINASE_B_SIGNALING	100	0.554581	1.64869	0	0.0893772	0.988	2675	tags=38%, list=17%, signal=46%
GOBP_REGULATION_OF_MACROPHAGE_CHEMOTAXIS	GOBP_REGULATION_OF_MACROPHAGE_CHEMOTAXIS	24	0.655989	1.64834	0.0102881	0.0894371	0.988	3273	tags=54%, list=21%, signal=69%
GOBP_REGULATION_OF_CELLULAR_RESPONSE_TO_GROWTH_FACTOR_STIMULUS	GOBP_REGULATION_OF_CELLULAR_RESPONSE_TO_GROWTH_FACTOR_STIMULUS	268	0.504437	1.64819	0.00591716	0.0893516	0.988	3419	tags=35%, list=22%, signal=44%
GOBP_MUSCLE_ADAPTATION	GOBP_MUSCLE_ADAPTATION	96	0.512355	1.64812	0.00190476	0.0892225	0.988	3627	tags=39%, list=24%, signal=50%
GOBP_OUTFLOW_TRACT_SEPTUM_MORPHOGENESIS	GOBP_OUTFLOW_TRACT_SEPTUM_MORPHOGENESIS	26	0.640823	1.64766	0.01222	0.0894262	0.988	4179	tags=69%, list=27%, signal=95%
GOBP_REGULATION_OF_CELL_MATRIX_ADHESION	GOBP_REGULATION_OF_CELL_MATRIX_ADHESION	115	0.478563	1.6473	0.00806452	0.089498	0.988	3844	tags=38%, list=25%, signal=51%
GOBP_T_CELL_SELECTION	GOBP_T_CELL_SELECTION	48	0.736111	1.64708	0.0143149	0.0894748	0.988	2098	tags=56%, list=14%, signal=65%
GOBP_REGULATION_OF_NATURAL_KILLER_CELL_ACTIVATION	GOBP_REGULATION_OF_NATURAL_KILLER_CELL_ACTIVATION	35	0.653886	1.64654	0.00808081	0.0896761	0.988	3270	tags=57%, list=21%, signal=72%
GOBP_NEGATIVE_REGULATION_OF_RESPONSE_TO_ENDOPLASMIC_RETICULUM_STRESS	GOBP_NEGATIVE_REGULATION_OF_RESPONSE_TO_ENDOPLASMIC_RETICULUM_STRESS	38	0.422634	1.64626	0.0448065	0.0896453	0.988	5155	tags=37%, list=34%, signal=55%
GOBP_STRIATED_MUSCLE_CELL_PROLIFERATION	GOBP_STRIATED_MUSCLE_CELL_PROLIFERATION	56	0.566516	1.646	0.00596422	0.0896582	0.988	3543	tags=41%, list=23%, signal=53%
GOBP_NEGATIVE_REGULATION_OF_I_KAPPAB_KINASE_NF_KAPPAB_SIGNALING	GOBP_NEGATIVE_REGULATION_OF_I_KAPPAB_KINASE_NF_KAPPAB_SIGNALING	42	0.522242	1.64578	0.0305499	0.0895973	0.988	4667	tags=45%, list=30%, signal=65%
GOBP_MONOCYTE_CHEMOTACTIC_PROTEIN_1_PRODUCTION	GOBP_MONOCYTE_CHEMOTACTIC_PROTEIN_1_PRODUCTION	17	0.742094	1.64546	0.00197628	0.089674	0.989	2788	tags=53%, list=18%, signal=65%
GOBP_RELEASE_OF_SEQUESTERED_CALCIUM_ION_INTO_CYTOSOL_BY_ENDOPLASMIC_RETICULUM	GOBP_RELEASE_OF_SEQUESTERED_CALCIUM_ION_INTO_CYTOSOL_BY_ENDOPLASMIC_RETICULUM	31	0.691926	1.64541	0	0.0895128	0.989	1711	tags=45%, list=11%, signal=51%
GOBP_POSITIVE_REGULATION_OF_INTERLEUKIN_8_PRODUCTION	GOBP_POSITIVE_REGULATION_OF_INTERLEUKIN_8_PRODUCTION	58	0.60055	1.64472	0.0101626	0.0897728	0.989	2468	tags=41%, list=16%, signal=49%
GOBP_CELLULAR_DEFENSE_RESPONSE	GOBP_CELLULAR_DEFENSE_RESPONSE	48	0.714533	1.64458	0.00401606	0.0896824	0.989	2250	tags=54%, list=15%, signal=63%
GOBP_VIRAL_GENOME_REPLICATION	GOBP_VIRAL_GENOME_REPLICATION	117	0.440963	1.64413	0.0372671	0.0897568	0.989	4606	tags=38%, list=30%, signal=55%
GOBP_POSITIVE_REGULATION_OF_CYTOSKELETON_ORGANIZATION	GOBP_POSITIVE_REGULATION_OF_CYTOSKELETON_ORGANIZATION	179	0.450829	1.64408	0	0.0896038	0.989	2593	tags=26%, list=17%, signal=31%
GOBP_RUFFLE_ORGANIZATION	GOBP_RUFFLE_ORGANIZATION	52	0.498977	1.64406	0.0142566	0.0894261	0.989	1737	tags=25%, list=11%, signal=28%
GOBP_POSITIVE_REGULATION_OF_CELL_MIGRATION_INVOLVED_IN_SPROUTING_ANGIOGENESIS	GOBP_POSITIVE_REGULATION_OF_CELL_MIGRATION_INVOLVED_IN_SPROUTING_ANGIOGENESIS	20	0.672377	1.64372	0.0100402	0.089495	0.989	3288	tags=60%, list=21%, signal=76%
GOBP_POSITIVE_REGULATION_OF_PLASMA_MEMBRANE_BOUNDED_CELL_PROJECTION_ASSEMBLY	GOBP_POSITIVE_REGULATION_OF_PLASMA_MEMBRANE_BOUNDED_CELL_PROJECTION_ASSEMBLY	94	0.460143	1.64371	0.00998004	0.0893026	0.989	3677	tags=34%, list=24%, signal=44%
GOBP_REGULATION_OF_PHOSPHOLIPASE_C_ACTIVITY	GOBP_REGULATION_OF_PHOSPHOLIPASE_C_ACTIVITY	43	0.637368	1.64367	0.00636943	0.0891399	0.989	2675	tags=49%, list=17%, signal=59%
GOBP_NEGATIVE_REGULATION_OF_CELLULAR_RESPONSE_TO_GROWTH_FACTOR_STIMULUS	GOBP_NEGATIVE_REGULATION_OF_CELLULAR_RESPONSE_TO_GROWTH_FACTOR_STIMULUS	92	0.565273	1.64278	0.00394477	0.0896283	0.989	3275	tags=39%, list=21%, signal=49%
GOBP_LAMELLIPODIUM_ORGANIZATION	GOBP_LAMELLIPODIUM_ORGANIZATION	81	0.447426	1.64239	0.00395257	0.0897174	0.989	4243	tags=44%, list=28%, signal=61%
GOBP_POSITIVE_REGULATION_OF_MAPK_CASCADE	GOBP_POSITIVE_REGULATION_OF_MAPK_CASCADE	427	0.498421	1.64226	0.00200803	0.0896287	0.989	3463	tags=42%, list=23%, signal=52%
GOBP_MUSCLE_CELL_MIGRATION	GOBP_MUSCLE_CELL_MIGRATION	77	0.531231	1.64197	0.00386847	0.0896682	0.989	3430	tags=39%, list=22%, signal=50%
GOBP_INTERLEUKIN_4_PRODUCTION	GOBP_INTERLEUKIN_4_PRODUCTION	29	0.704658	1.64166	0.0119284	0.0897595	0.989	2018	tags=52%, list=13%, signal=59%
GOBP_MONOCYTE_DIFFERENTIATION	GOBP_MONOCYTE_DIFFERENTIATION	32	0.582731	1.64125	0.0101626	0.0899052	0.99	2244	tags=38%, list=15%, signal=44%
GOBP_CELLULAR_RESPONSE_TO_INTERFERON_GAMMA	GOBP_CELLULAR_RESPONSE_TO_INTERFERON_GAMMA	98	0.615703	1.64076	0.0125	0.0900385	0.99	3096	tags=48%, list=20%, signal=60%
GOBP_POSITIVE_REGULATION_OF_PHOSPHATIDYLINOSITOL_3_KINASE_SIGNALING	GOBP_POSITIVE_REGULATION_OF_PHOSPHATIDYLINOSITOL_3_KINASE_SIGNALING	74	0.61643	1.64027	0.00206186	0.0901543	0.99	3807	tags=59%, list=25%, signal=79%
GOBP_REGULATION_OF_CELL_COMMUNICATION_BY_ELECTRICAL_COUPLING	GOBP_REGULATION_OF_CELL_COMMUNICATION_BY_ELECTRICAL_COUPLING	15	0.732005	1.64025	0.00804829	0.08996	0.99	1906	tags=53%, list=12%, signal=61%
GOBP_NEGATIVE_REGULATION_OF_ION_TRANSMEMBRANE_TRANSPORTER_ACTIVITY	GOBP_NEGATIVE_REGULATION_OF_ION_TRANSMEMBRANE_TRANSPORTER_ACTIVITY	60	0.582086	1.63996	0.00199601	0.0899945	0.99	3269	tags=40%, list=21%, signal=51%
GOBP_ANTIGEN_PROCESSING_AND_PRESENTATION_OF_EXOGENOUS_ANTIGEN	GOBP_ANTIGEN_PROCESSING_AND_PRESENTATION_OF_EXOGENOUS_ANTIGEN	39	0.724688	1.63927	0	0.0903021	0.992	3294	tags=69%, list=21%, signal=88%
GOBP_NEGATIVE_REGULATION_OF_CELL_SUBSTRATE_JUNCTION_ORGANIZATION	GOBP_NEGATIVE_REGULATION_OF_CELL_SUBSTRATE_JUNCTION_ORGANIZATION	16	0.639958	1.63914	0.0241935	0.0902078	0.992	1973	tags=38%, list=13%, signal=43%
GOBP_MESENCHYME_MORPHOGENESIS	GOBP_MESENCHYME_MORPHOGENESIS	55	0.625773	1.6383	0.01222	0.090601	0.992	4826	tags=69%, list=31%, signal=100%
GOBP_POSITIVE_REGULATION_OF_LEUKOCYTE_MEDIATED_IMMUNITY	GOBP_POSITIVE_REGULATION_OF_LEUKOCYTE_MEDIATED_IMMUNITY	118	0.650154	1.63824	0.0144628	0.0904516	0.992	2849	tags=52%, list=19%, signal=63%
GOBP_NEGATIVE_REGULATION_OF_T_CELL_DIFFERENTIATION	GOBP_NEGATIVE_REGULATION_OF_T_CELL_DIFFERENTIATION	41	0.586416	1.63813	0.0206186	0.090313	0.992	2705	tags=39%, list=18%, signal=47%
GOBP_REGULATION_OF_CELLULAR_RESPONSE_TO_TRANSFORMING_GROWTH_FACTOR_BETA_STIMULUS	GOBP_REGULATION_OF_CELLULAR_RESPONSE_TO_TRANSFORMING_GROWTH_FACTOR_BETA_STIMULUS	118	0.479854	1.63764	0.0159681	0.0904329	0.992	3385	tags=33%, list=22%, signal=42%
GOBP_RESPONSE_TO_SALT_STRESS	GOBP_RESPONSE_TO_SALT_STRESS	26	0.566736	1.63758	0.0101833	0.0902895	0.992	1380	tags=23%, list=9%, signal=25%
GOBP_NEGATIVE_REGULATION_OF_ALPHA_BETA_T_CELL_ACTIVATION	GOBP_NEGATIVE_REGULATION_OF_ALPHA_BETA_T_CELL_ACTIVATION	34	0.605322	1.6375	0.0398406	0.0901868	0.992	3075	tags=47%, list=20%, signal=59%
GOBP_LEUKOCYTE_TETHERING_OR_ROLLING	GOBP_LEUKOCYTE_TETHERING_OR_ROLLING	33	0.723835	1.63715	0.0059761	0.09029	0.993	2524	tags=61%, list=16%, signal=72%
GOBP_POSITIVE_REGULATION_OF_INTERFERON_GAMMA_PRODUCTION	GOBP_POSITIVE_REGULATION_OF_INTERFERON_GAMMA_PRODUCTION	70	0.708111	1.63698	0.0102669	0.0902049	0.993	2184	tags=57%, list=14%, signal=66%
GOBP_VASCULAR_ENDOTHELIAL_GROWTH_FACTOR_RECEPTOR_SIGNALING_PATHWAY	GOBP_VASCULAR_ENDOTHELIAL_GROWTH_FACTOR_RECEPTOR_SIGNALING_PATHWAY	51	0.541943	1.63694	0.0197628	0.0900441	0.993	3288	tags=41%, list=21%, signal=52%
GOBP_REGULATION_OF_ACTIN_FILAMENT_LENGTH	GOBP_REGULATION_OF_ACTIN_FILAMENT_LENGTH	138	0.469339	1.63627	0	0.0904586	0.993	4267	tags=45%, list=28%, signal=62%
GOBP_POSITIVE_REGULATION_OF_OXIDOREDUCTASE_ACTIVITY	GOBP_POSITIVE_REGULATION_OF_OXIDOREDUCTASE_ACTIVITY	53	0.518755	1.63556	0.0060241	0.0908969	0.993	3035	tags=34%, list=20%, signal=42%
GOBP_INTERLEUKIN_8_PRODUCTION	GOBP_INTERLEUKIN_8_PRODUCTION	76	0.597383	1.63522	0.00610998	0.0910031	0.994	3693	tags=54%, list=24%, signal=71%
GOBP_LYMPH_VESSEL_DEVELOPMENT	GOBP_LYMPH_VESSEL_DEVELOPMENT	29	0.66989	1.6351	0.0180723	0.090873	0.994	3850	tags=66%, list=25%, signal=87%
GOBP_POSITIVE_REGULATION_OF_ERK1_AND_ERK2_CASCADE	GOBP_POSITIVE_REGULATION_OF_ERK1_AND_ERK2_CASCADE	178	0.564547	1.63449	0	0.0911327	0.994	3419	tags=51%, list=22%, signal=64%
GOBP_CELL_CELL_ADHESION_MEDIATED_BY_INTEGRIN	GOBP_CELL_CELL_ADHESION_MEDIATED_BY_INTEGRIN	15	0.720945	1.63372	0.0181087	0.0915275	0.994	2111	tags=47%, list=14%, signal=54%
GOBP_NEGATIVE_REGULATION_OF_T_CELL_PROLIFERATION	GOBP_NEGATIVE_REGULATION_OF_T_CELL_PROLIFERATION	59	0.62001	1.63348	0.0163599	0.0915102	0.994	2918	tags=49%, list=19%, signal=60%
GOBP_REGULATION_OF_MYOBLAST_FUSION	GOBP_REGULATION_OF_MYOBLAST_FUSION	19	0.631448	1.63323	0.0181818	0.0915166	0.994	3195	tags=63%, list=21%, signal=80%
GOBP_REGULATION_OF_CARDIAC_MUSCLE_CELL_PROLIFERATION	GOBP_REGULATION_OF_CARDIAC_MUSCLE_CELL_PROLIFERATION	36	0.613328	1.63301	0.0102249	0.0914953	0.995	3543	tags=50%, list=23%, signal=65%
GOBP_POSITIVE_REGULATION_OF_ORGAN_GROWTH	GOBP_POSITIVE_REGULATION_OF_ORGAN_GROWTH	40	0.630014	1.63297	0.01002	0.0913272	0.995	2516	tags=45%, list=16%, signal=54%
GOBP_NEGATIVE_REGULATION_OF_DNA_BINDING_TRANSCRIPTION_FACTOR_ACTIVITY	GOBP_NEGATIVE_REGULATION_OF_DNA_BINDING_TRANSCRIPTION_FACTOR_ACTIVITY	154	0.435152	1.63191	0.004	0.0919863	0.995	3569	tags=36%, list=23%, signal=47%
GOBP_POSITIVE_REGULATION_OF_T_CELL_MEDIATED_IMMUNITY	GOBP_POSITIVE_REGULATION_OF_T_CELL_MEDIATED_IMMUNITY	52	0.673692	1.63172	0.00829876	0.0919444	0.995	2098	tags=48%, list=14%, signal=55%
GOBP_CALCIUM_ION_IMPORT_INTO_CYTOSOL	GOBP_CALCIUM_ION_IMPORT_INTO_CYTOSOL	21	0.676	1.63149	0.00767754	0.0918721	0.995	2580	tags=52%, list=17%, signal=63%
GOBP_ENDOTHELIUM_DEVELOPMENT	GOBP_ENDOTHELIUM_DEVELOPMENT	123	0.498637	1.63125	0.00843882	0.0918953	0.995	3899	tags=45%, list=25%, signal=59%
GOBP_RESPONSE_TO_TUMOR_CELL	GOBP_RESPONSE_TO_TUMOR_CELL	35	0.638941	1.63109	0.0242424	0.0918016	0.995	2006	tags=46%, list=13%, signal=52%
GOBP_REGULATION_OF_FILOPODIUM_ASSEMBLY	GOBP_REGULATION_OF_FILOPODIUM_ASSEMBLY	41	0.51499	1.63082	0.0146444	0.0918147	0.995	2486	tags=24%, list=16%, signal=29%
GOBP_SARCOPLASMIC_RETICULUM_CALCIUM_ION_TRANSPORT	GOBP_SARCOPLASMIC_RETICULUM_CALCIUM_ION_TRANSPORT	35	0.664519	1.63078	0.00775194	0.0916419	0.995	1711	tags=40%, list=11%, signal=45%
GOBP_REGULATION_OF_LEUKOCYTE_APOPTOTIC_PROCESS	GOBP_REGULATION_OF_LEUKOCYTE_APOPTOTIC_PROCESS	79	0.562941	1.63051	0.0163599	0.0916605	0.995	3796	tags=54%, list=25%, signal=72%
GOBP_RESPONSE_TO_REACTIVE_OXYGEN_SPECIES	GOBP_RESPONSE_TO_REACTIVE_OXYGEN_SPECIES	176	0.427249	1.6302	0.0121457	0.0917471	0.995	2794	tags=27%, list=18%, signal=33%
GOBP_DEPHOSPHORYLATION	GOBP_DEPHOSPHORYLATION	363	0.352516	1.63013	0.00200401	0.0915976	0.995	4675	tags=37%, list=30%, signal=51%
GOBP_POSITIVE_REGULATION_OF_CD4_POSITIVE_ALPHA_BETA_T_CELL_ACTIVATION	GOBP_POSITIVE_REGULATION_OF_CD4_POSITIVE_ALPHA_BETA_T_CELL_ACTIVATION	35	0.699845	1.62996	0.0121704	0.0915312	0.995	3090	tags=66%, list=20%, signal=82%
GOBP_REGULATION_OF_CELL_PROJECTION_ASSEMBLY	GOBP_REGULATION_OF_CELL_PROJECTION_ASSEMBLY	198	0.396573	1.62962	0.00608519	0.0915411	0.995	4810	tags=40%, list=31%, signal=57%
GOBP_LAMELLIPODIUM_ASSEMBLY	GOBP_LAMELLIPODIUM_ASSEMBLY	65	0.47171	1.62954	0.00400802	0.0914088	0.995	3811	tags=40%, list=25%, signal=53%
GOBP_POSITIVE_REGULATION_OF_CYTOKINE_PRODUCTION_INVOLVED_IN_IMMUNE_RESPONSE	GOBP_POSITIVE_REGULATION_OF_CYTOKINE_PRODUCTION_INVOLVED_IN_IMMUNE_RESPONSE	63	0.598875	1.6293	0.0162272	0.0913802	0.995	3875	tags=56%, list=25%, signal=74%
GOBP_REGULATION_OF_LIPASE_ACTIVITY	GOBP_REGULATION_OF_LIPASE_ACTIVITY	85	0.555821	1.62926	0.00214133	0.091215	0.995	3093	tags=44%, list=20%, signal=54%
GOBP_REGULATION_OF_T_CELL_APOPTOTIC_PROCESS	GOBP_REGULATION_OF_T_CELL_APOPTOTIC_PROCESS	31	0.601996	1.62853	0.0209644	0.0916084	0.995	3519	tags=52%, list=23%, signal=67%
GOBP_POSITIVE_T_CELL_SELECTION	GOBP_POSITIVE_T_CELL_SELECTION	35	0.747759	1.62837	0.0204499	0.091531	0.995	2098	tags=57%, list=14%, signal=66%
GOBP_POSITIVE_REGULATION_OF_PROTEIN_LOCALIZATION_TO_MEMBRANE	GOBP_POSITIVE_REGULATION_OF_PROTEIN_LOCALIZATION_TO_MEMBRANE	87	0.425783	1.62818	0.00413223	0.0915058	0.995	3126	tags=30%, list=20%, signal=37%
GOBP_POSITIVE_REGULATION_OF_PROTEIN_LOCALIZATION_TO_CELL_PERIPHERY	GOBP_POSITIVE_REGULATION_OF_PROTEIN_LOCALIZATION_TO_CELL_PERIPHERY	63	0.466542	1.62809	0.0020202	0.0913863	0.995	3126	tags=33%, list=20%, signal=42%
GOBP_INTERFERON_BETA_PRODUCTION	GOBP_INTERFERON_BETA_PRODUCTION	53	0.515781	1.62807	0.0475207	0.0912442	0.995	2527	tags=30%, list=16%, signal=36%
GOBP_ACTOMYOSIN_STRUCTURE_ORGANIZATION	GOBP_ACTOMYOSIN_STRUCTURE_ORGANIZATION	187	0.464899	1.62799	0.00578035	0.0911484	0.995	3599	tags=37%, list=23%, signal=48%
GOBP_THYMIC_T_CELL_SELECTION	GOBP_THYMIC_T_CELL_SELECTION	22	0.74024	1.62795	0.0205339	0.0910042	0.995	1165	tags=45%, list=8%, signal=49%
GOBP_POSITIVE_REGULATION_OF_JUN_KINASE_ACTIVITY	GOBP_POSITIVE_REGULATION_OF_JUN_KINASE_ACTIVITY	42	0.531909	1.62785	0.0141129	0.0909252	0.995	3377	tags=43%, list=22%, signal=55%
GOBP_NEGATIVE_REGULATION_OF_PROTEIN_ACETYLATION	GOBP_NEGATIVE_REGULATION_OF_PROTEIN_ACETYLATION	21	0.544514	1.62705	0.0168776	0.091311	0.995	2702	tags=24%, list=18%, signal=29%
GOBP_RESPONSE_TO_INTERFERON_GAMMA	GOBP_RESPONSE_TO_INTERFERON_GAMMA	118	0.590225	1.62683	0.018595	0.0912767	0.995	3096	tags=45%, list=20%, signal=56%
GOBP_CELLULAR_RESPONSE_TO_GROWTH_HORMONE_STIMULUS	GOBP_CELLULAR_RESPONSE_TO_GROWTH_HORMONE_STIMULUS	22	0.576378	1.6268	0.033195	0.0911104	0.995	4710	tags=64%, list=31%, signal=92%
GOBP_CARDIAC_MUSCLE_CELL_PROLIFERATION	GOBP_CARDIAC_MUSCLE_CELL_PROLIFERATION	43	0.583169	1.62652	0.0118343	0.0911535	0.995	4345	tags=53%, list=28%, signal=74%
GOBP_POSITIVE_REGULATION_OF_ACTIN_FILAMENT_POLYMERIZATION	GOBP_POSITIVE_REGULATION_OF_ACTIN_FILAMENT_POLYMERIZATION	47	0.54042	1.6265	0.0139165	0.0909934	0.995	2739	tags=36%, list=18%, signal=44%
GOBP_MUSCLE_CONTRACTION	GOBP_MUSCLE_CONTRACTION	318	0.527071	1.6263	0.00377358	0.0909278	0.995	2548	tags=33%, list=17%, signal=39%
GOBP_ENDOCARDIAL_CUSHION_FORMATION	GOBP_ENDOCARDIAL_CUSHION_FORMATION	31	0.657231	1.62622	0.0144033	0.0907866	0.995	4533	tags=74%, list=30%, signal=105%
GOBP_ANTIGEN_PROCESSING_AND_PRESENTATION_OF_PEPTIDE_OR_POLYSACCHARIDE_ANTIGEN_VIA_MHC_CLASS_II	GOBP_ANTIGEN_PROCESSING_AND_PRESENTATION_OF_PEPTIDE_OR_POLYSACCHARIDE_ANTIGEN_VIA_MHC_CLASS_II	27	0.706493	1.62608	0.0103093	0.0906802	0.995	3294	tags=70%, list=21%, signal=89%
GOBP_POSITIVE_REGULATION_OF_EPITHELIAL_CELL_APOPTOTIC_PROCESS	GOBP_POSITIVE_REGULATION_OF_EPITHELIAL_CELL_APOPTOTIC_PROCESS	26	0.664661	1.62571	0.0100806	0.0907469	0.995	3358	tags=58%, list=22%, signal=74%
GOBP_NEUROTROPHIN_SIGNALING_PATHWAY	GOBP_NEUROTROPHIN_SIGNALING_PATHWAY	36	0.614231	1.62528	0.00803213	0.0908824	0.995	3591	tags=50%, list=23%, signal=65%
GOBP_DETECTION_OF_OTHER_ORGANISM	GOBP_DETECTION_OF_OTHER_ORGANISM	17	0.727754	1.62516	0.0164271	0.0908094	0.995	3459	tags=71%, list=23%, signal=91%
GOBP_FOAM_CELL_DIFFERENTIATION	GOBP_FOAM_CELL_DIFFERENTIATION	37	0.652805	1.62508	0.00394477	0.0906874	0.995	4493	tags=73%, list=29%, signal=103%
GOBP_REGULATION_OF_PROTEIN_CONTAINING_COMPLEX_ASSEMBLY	GOBP_REGULATION_OF_PROTEIN_CONTAINING_COMPLEX_ASSEMBLY	354	0.387437	1.62508	0	0.0905196	0.995	3908	tags=33%, list=25%, signal=43%
GOBP_NEGATIVE_REGULATION_OF_ALPHA_BETA_T_CELL_DIFFERENTIATION	GOBP_NEGATIVE_REGULATION_OF_ALPHA_BETA_T_CELL_DIFFERENTIATION	24	0.634203	1.62477	0.01875	0.0905597	0.995	3075	tags=46%, list=20%, signal=57%
GOBP_POSITIVE_REGULATION_OF_PROTEIN_DEACETYLATION	GOBP_POSITIVE_REGULATION_OF_PROTEIN_DEACETYLATION	28	0.463216	1.62462	0.0271967	0.0905211	0.995	2707	tags=21%, list=18%, signal=26%
GOBP_CD4_POSITIVE_ALPHA_BETA_T_CELL_DIFFERENTIATION	GOBP_CD4_POSITIVE_ALPHA_BETA_T_CELL_DIFFERENTIATION	76	0.629043	1.62445	0.0203252	0.0904931	0.995	3306	tags=55%, list=22%, signal=70%
GOBP_REGULATION_OF_ATP_METABOLIC_PROCESS	GOBP_REGULATION_OF_ATP_METABOLIC_PROCESS	75	0.435343	1.62434	0.00610998	0.0903979	0.995	2766	tags=24%, list=18%, signal=29%
GOBP_TYROSINE_PHOSPHORYLATION_OF_STAT_PROTEIN	GOBP_TYROSINE_PHOSPHORYLATION_OF_STAT_PROTEIN	73	0.573306	1.62391	0.00196464	0.0904828	0.995	2585	tags=38%, list=17%, signal=46%
GOBP_REGULATION_OF_T_HELPER_CELL_DIFFERENTIATION	GOBP_REGULATION_OF_T_HELPER_CELL_DIFFERENTIATION	36	0.661906	1.62324	0.0198807	0.0907708	0.995	3795	tags=64%, list=25%, signal=85%
GOBP_POSITIVE_REGULATION_OF_INTERFERON_BETA_PRODUCTION	GOBP_POSITIVE_REGULATION_OF_INTERFERON_BETA_PRODUCTION	37	0.539596	1.6231	0.0529532	0.090704	0.995	2527	tags=30%, list=16%, signal=35%
GOBP_POSITIVE_REGULATION_OF_VASCULAR_ENDOTHELIAL_GROWTH_FACTOR_PRODUCTION	GOBP_POSITIVE_REGULATION_OF_VASCULAR_ENDOTHELIAL_GROWTH_FACTOR_PRODUCTION	28	0.672021	1.62223	0.00205339	0.0912557	0.996	2663	tags=54%, list=17%, signal=65%
GOBP_ALPHA_BETA_T_CELL_PROLIFERATION	GOBP_ALPHA_BETA_T_CELL_PROLIFERATION	34	0.686807	1.62212	0.0240964	0.0911536	0.996	3128	tags=62%, list=20%, signal=77%
GOBP_NEGATIVE_REGULATION_OF_LYMPHOCYTE_ACTIVATION	GOBP_NEGATIVE_REGULATION_OF_LYMPHOCYTE_ACTIVATION	143	0.560087	1.62178	0.0381526	0.0912066	0.996	3104	tags=48%, list=20%, signal=59%
GOBP_SIALYLATION	GOBP_SIALYLATION	19	0.672266	1.62172	0.00784314	0.091069	0.996	3263	tags=53%, list=21%, signal=67%
GOBP_REGULATION_OF_PROTEIN_LOCALIZATION_TO_CELL_PERIPHERY	GOBP_REGULATION_OF_PROTEIN_LOCALIZATION_TO_CELL_PERIPHERY	115	0.417799	1.62023	0.00806452	0.0919714	0.997	3301	tags=30%, list=21%, signal=37%
GOBP_NEGATIVE_REGULATION_OF_HISTONE_ACETYLATION	GOBP_NEGATIVE_REGULATION_OF_HISTONE_ACETYLATION	16	0.597878	1.62015	0.0330578	0.0918763	0.997	1996	tags=25%, list=13%, signal=29%
GOBP_POSITIVE_REGULATION_OF_FAT_CELL_DIFFERENTIATION	GOBP_POSITIVE_REGULATION_OF_FAT_CELL_DIFFERENTIATION	59	0.545096	1.61984	0.00610998	0.0919549	0.997	3858	tags=49%, list=25%, signal=65%
GOBP_IMMUNOGLOBULIN_PRODUCTION_INVOLVED_IN_IMMUNOGLOBULIN_MEDIATED_IMMUNE_RESPONSE	GOBP_IMMUNOGLOBULIN_PRODUCTION_INVOLVED_IN_IMMUNOGLOBULIN_MEDIATED_IMMUNE_RESPONSE	60	0.611526	1.61982	0.0282258	0.0917958	0.997	2078	tags=38%, list=14%, signal=44%
GOBP_REGULATION_OF_SUPEROXIDE_METABOLIC_PROCESS	GOBP_REGULATION_OF_SUPEROXIDE_METABOLIC_PROCESS	28	0.639762	1.61943	0.00622407	0.0918834	0.997	4645	tags=71%, list=30%, signal=102%
GOBP_POSITIVE_REGULATION_OF_CELL_SUBSTRATE_ADHESION	GOBP_POSITIVE_REGULATION_OF_CELL_SUBSTRATE_ADHESION	117	0.517334	1.61743	0.00603622	0.0932033	0.997	3587	tags=44%, list=23%, signal=58%
GOBP_B_CELL_ACTIVATION	GOBP_B_CELL_ACTIVATION	243	0.533147	1.61699	0.0361446	0.0933811	0.997	3474	tags=42%, list=23%, signal=54%
GOBP_CARDIAC_SEPTUM_DEVELOPMENT	GOBP_CARDIAC_SEPTUM_DEVELOPMENT	101	0.51248	1.61684	0.029703	0.0932871	0.997	3440	tags=42%, list=22%, signal=53%
GOBP_SEGMENT_SPECIFICATION	GOBP_SEGMENT_SPECIFICATION	15	0.725304	1.61672	0.00591716	0.0931809	0.997	2629	tags=47%, list=17%, signal=56%
GOBP_NEUROINFLAMMATORY_RESPONSE	GOBP_NEUROINFLAMMATORY_RESPONSE	34	0.727647	1.61601	0	0.0935767	0.997	2927	tags=71%, list=19%, signal=87%
GOBP_REGULATION_OF_VESICLE_MEDIATED_TRANSPORT	GOBP_REGULATION_OF_VESICLE_MEDIATED_TRANSPORT	490	0.437104	1.61541	0.002079	0.0938886	0.997	4396	tags=40%, list=29%, signal=55%
GOBP_POSITIVE_REGULATION_OF_CELL_PROJECTION_ORGANIZATION	GOBP_POSITIVE_REGULATION_OF_CELL_PROJECTION_ORGANIZATION	309	0.440263	1.61541	0	0.0937163	0.997	3750	tags=35%, list=24%, signal=45%
GOBP_REGULATION_OF_JNK_CASCADE	GOBP_REGULATION_OF_JNK_CASCADE	136	0.467718	1.61531	0.00398406	0.0936098	0.997	3413	tags=35%, list=22%, signal=45%
GOBP_HEART_VALVE_DEVELOPMENT	GOBP_HEART_VALVE_DEVELOPMENT	62	0.579075	1.61529	0.0143149	0.0934486	0.997	3832	tags=53%, list=25%, signal=71%
GOBP_REGULATION_OF_ACTOMYOSIN_STRUCTURE_ORGANIZATION	GOBP_REGULATION_OF_ACTOMYOSIN_STRUCTURE_ORGANIZATION	92	0.449916	1.61527	0.0136187	0.093286	0.997	3599	tags=34%, list=23%, signal=44%
GOBP_REGULATION_OF_EXTRACELLULAR_MATRIX_ORGANIZATION	GOBP_REGULATION_OF_EXTRACELLULAR_MATRIX_ORGANIZATION	41	0.593619	1.61374	0.0272904	0.0941768	0.997	4695	tags=59%, list=31%, signal=84%
GOBP_NEGATIVE_REGULATION_OF_RELEASE_OF_CYTOCHROME_C_FROM_MITOCHONDRIA	GOBP_NEGATIVE_REGULATION_OF_RELEASE_OF_CYTOCHROME_C_FROM_MITOCHONDRIA	18	0.505825	1.6136	0.0417537	0.0940967	0.997	3031	tags=28%, list=20%, signal=35%
GOBP_DENDRITIC_CELL_DIFFERENTIATION	GOBP_DENDRITIC_CELL_DIFFERENTIATION	44	0.648419	1.6134	0.018595	0.0940857	0.997	4333	tags=70%, list=28%, signal=98%
GOBP_RELAXATION_OF_MUSCLE	GOBP_RELAXATION_OF_MUSCLE	30	0.649664	1.61318	0.00621118	0.0940825	0.997	3093	tags=53%, list=20%, signal=67%
GOBP_T_CELL_LINEAGE_COMMITMENT	GOBP_T_CELL_LINEAGE_COMMITMENT	27	0.699934	1.61295	0.0166667	0.0941052	0.997	2098	tags=48%, list=14%, signal=56%
GOBP_CELLULAR_RESPONSE_TO_HEAT	GOBP_CELLULAR_RESPONSE_TO_HEAT	58	0.426884	1.61272	0.0165975	0.0941224	0.997	1556	tags=12%, list=10%, signal=13%
GOBP_AMINOGLYCAN_METABOLIC_PROCESS	GOBP_AMINOGLYCAN_METABOLIC_PROCESS	125	0.503967	1.6126	0.00613497	0.0940687	0.997	3432	tags=39%, list=22%, signal=50%
GOBP_REGULATION_OF_PEPTIDYL_SERINE_PHOSPHORYLATION	GOBP_REGULATION_OF_PEPTIDYL_SERINE_PHOSPHORYLATION	128	0.459646	1.61243	0.00404858	0.0940486	0.997	4243	tags=39%, list=28%, signal=54%
GOBP_T_CELL_MEDIATED_CYTOTOXICITY	GOBP_T_CELL_MEDIATED_CYTOTOXICITY	44	0.705027	1.6121	0.00835073	0.094108	0.997	3062	tags=66%, list=20%, signal=82%
GOBP_LYMPHOCYTE_COSTIMULATION	GOBP_LYMPHOCYTE_COSTIMULATION	44	0.707381	1.61166	0.018595	0.0942988	0.997	3172	tags=70%, list=21%, signal=89%
GOBP_B_CELL_PROLIFERATION	GOBP_B_CELL_PROLIFERATION	93	0.619179	1.61165	0.0241935	0.0941434	0.997	2330	tags=39%, list=15%, signal=45%
GOBP_WOUND_HEALING	GOBP_WOUND_HEALING	396	0.473019	1.61137	0.00792079	0.0941308	0.997	3449	tags=37%, list=22%, signal=46%
GOBP_B_CELL_RECEPTOR_SIGNALING_PATHWAY	GOBP_B_CELL_RECEPTOR_SIGNALING_PATHWAY	53	0.741091	1.61109	0.0143443	0.0941883	0.997	3104	tags=70%, list=20%, signal=87%
GOBP_SEROTONIN_TRANSPORT	GOBP_SEROTONIN_TRANSPORT	19	0.730143	1.61102	0.00796813	0.0940754	0.997	2018	tags=58%, list=13%, signal=67%
GOBP_REGULATION_OF_MIRNA_TRANSCRIPTION	GOBP_REGULATION_OF_MIRNA_TRANSCRIPTION	55	0.552393	1.61095	0.0158103	0.0939544	0.997	2955	tags=36%, list=19%, signal=45%
GOBP_REGULATION_OF_CELL_SUBSTRATE_JUNCTION_ORGANIZATION	GOBP_REGULATION_OF_CELL_SUBSTRATE_JUNCTION_ORGANIZATION	67	0.475985	1.61076	0.03	0.0939625	0.997	4725	tags=46%, list=31%, signal=67%
GOBP_MYELOID_CELL_APOPTOTIC_PROCESS	GOBP_MYELOID_CELL_APOPTOTIC_PROCESS	29	0.556667	1.61061	0.0265849	0.0939127	0.997	2373	tags=38%, list=15%, signal=45%
GOBP_VASCULAR_WOUND_HEALING	GOBP_VASCULAR_WOUND_HEALING	17	0.660394	1.61019	0.00617284	0.0940887	0.997	2991	tags=47%, list=19%, signal=58%
GOBP_REGULATION_OF_SYNAPTIC_VESICLE_RECYCLING	GOBP_REGULATION_OF_SYNAPTIC_VESICLE_RECYCLING	18	0.655802	1.6101	0.0249042	0.0939678	0.997	1266	tags=22%, list=8%, signal=24%
GOBP_REGULATION_OF_VASCULOGENESIS	GOBP_REGULATION_OF_VASCULOGENESIS	16	0.673948	1.60992	0.0120968	0.0940013	0.997	3539	tags=63%, list=23%, signal=81%
GOBP_CARBOHYDRATE_DERIVATIVE_CATABOLIC_PROCESS	GOBP_CARBOHYDRATE_DERIVATIVE_CATABOLIC_PROCESS	150	0.427617	1.60981	0.00581395	0.093936	0.997	4747	tags=46%, list=31%, signal=66%
GOBP_REGULATION_OF_CELL_SUBSTRATE_ADHESION	GOBP_REGULATION_OF_CELL_SUBSTRATE_ADHESION	202	0.472801	1.60971	0.0101215	0.0938254	0.997	4010	tags=42%, list=26%, signal=56%
GOBP_MYELOID_CELL_DEVELOPMENT	GOBP_MYELOID_CELL_DEVELOPMENT	68	0.482477	1.60954	0.0142276	0.093764	0.997	4171	tags=46%, list=27%, signal=62%
GOBP_RESPONSE_TO_INTERLEUKIN_6	GOBP_RESPONSE_TO_INTERLEUKIN_6	35	0.614253	1.60924	0.00416667	0.0938385	0.997	2098	tags=43%, list=14%, signal=50%
GOBP_CD4_POSITIVE_ALPHA_BETA_T_CELL_CYTOKINE_PRODUCTION	GOBP_CD4_POSITIVE_ALPHA_BETA_T_CELL_CYTOKINE_PRODUCTION	19	0.749872	1.60838	0.010142	0.0943245	0.997	2642	tags=63%, list=17%, signal=76%
GOBP_NEGATIVE_REGULATION_OF_CYTOKINE_PRODUCTION_INVOLVED_IN_IMMUNE_RESPONSE	GOBP_NEGATIVE_REGULATION_OF_CYTOKINE_PRODUCTION_INVOLVED_IN_IMMUNE_RESPONSE	27	0.709157	1.60815	0.0102669	0.0943401	0.997	2795	tags=67%, list=18%, signal=81%
GOBP_RESPONSE_TO_HYDROPEROXIDE	GOBP_RESPONSE_TO_HYDROPEROXIDE	16	0.597271	1.60794	0.0126582	0.0943239	0.997	4645	tags=56%, list=30%, signal=81%
GOBP_REGULATION_OF_LIPOPOLYSACCHARIDE_MEDIATED_SIGNALING_PATHWAY	GOBP_REGULATION_OF_LIPOPOLYSACCHARIDE_MEDIATED_SIGNALING_PATHWAY	23	0.644688	1.60794	0.0102041	0.0941601	0.997	3487	tags=52%, list=23%, signal=67%
GOBP_REACTIVE_NITROGEN_SPECIES_METABOLIC_PROCESS	GOBP_REACTIVE_NITROGEN_SPECIES_METABOLIC_PROCESS	70	0.553964	1.60782	0.01417	0.0940882	0.997	3294	tags=47%, list=21%, signal=60%
GOBP_MAINTENANCE_OF_LOCATION	GOBP_MAINTENANCE_OF_LOCATION	296	0.448314	1.60748	0.00197239	0.0941772	0.997	3580	tags=34%, list=23%, signal=43%
GOBP_INTRACELLULAR_RECEPTOR_SIGNALING_PATHWAY	GOBP_INTRACELLULAR_RECEPTOR_SIGNALING_PATHWAY	235	0.411243	1.60712	0.00198807	0.0942679	0.997	4805	tags=40%, list=31%, signal=58%
GOBP_POSITIVE_REGULATION_OF_LEUKOCYTE_ADHESION_TO_VASCULAR_ENDOTHELIAL_CELL	GOBP_POSITIVE_REGULATION_OF_LEUKOCYTE_ADHESION_TO_VASCULAR_ENDOTHELIAL_CELL	22	0.72028	1.6065	0.0040568	0.0945701	0.997	3313	tags=68%, list=22%, signal=87%
GOBP_REGULATION_OF_TUMOR_NECROSIS_FACTOR_MEDIATED_SIGNALING_PATHWAY	GOBP_REGULATION_OF_TUMOR_NECROSIS_FACTOR_MEDIATED_SIGNALING_PATHWAY	46	0.464416	1.60645	0.0259481	0.0944481	0.997	2422	tags=26%, list=16%, signal=31%
GOBP_POSITIVE_REGULATION_OF_TRANSMEMBRANE_TRANSPORT	GOBP_POSITIVE_REGULATION_OF_TRANSMEMBRANE_TRANSPORT	184	0.49757	1.60609	0	0.0945722	0.997	2995	tags=38%, list=20%, signal=47%
GOBP_ERK1_AND_ERK2_CASCADE	GOBP_ERK1_AND_ERK2_CASCADE	283	0.506432	1.60598	0	0.0945051	0.997	3794	tags=47%, list=25%, signal=62%
GOBP_CD4_POSITIVE_OR_CD8_POSITIVE_ALPHA_BETA_T_CELL_LINEAGE_COMMITMENT	GOBP_CD4_POSITIVE_OR_CD8_POSITIVE_ALPHA_BETA_T_CELL_LINEAGE_COMMITMENT	21	0.751314	1.60566	0.0165631	0.0945329	0.997	2098	tags=57%, list=14%, signal=66%
GOBP_POSITIVE_REGULATION_OF_LYMPHOCYTE_MEDIATED_IMMUNITY	GOBP_POSITIVE_REGULATION_OF_LYMPHOCYTE_MEDIATED_IMMUNITY	97	0.653049	1.60534	0.0204082	0.0945969	0.997	2849	tags=54%, list=19%, signal=65%
GOBP_VENTRICULAR_SEPTUM_MORPHOGENESIS	GOBP_VENTRICULAR_SEPTUM_MORPHOGENESIS	39	0.627393	1.60526	0.0124224	0.0945174	0.997	3832	tags=56%, list=25%, signal=75%
GOBP_MUSCLE_SYSTEM_PROCESS	GOBP_MUSCLE_SYSTEM_PROCESS	395	0.50994	1.60525	0.00382409	0.0943626	0.997	2548	tags=31%, list=17%, signal=37%
GOBP_POSITIVE_REGULATION_OF_CALCIUM_ION_TRANSPORT	GOBP_POSITIVE_REGULATION_OF_CALCIUM_ION_TRANSPORT	105	0.535363	1.60525	0.00197628	0.0942067	0.997	3397	tags=46%, list=22%, signal=58%
GOBP_TOLL_LIKE_RECEPTOR_4_SIGNALING_PATHWAY	GOBP_TOLL_LIKE_RECEPTOR_4_SIGNALING_PATHWAY	35	0.598055	1.60513	0.0163265	0.094144	0.997	4120	tags=57%, list=27%, signal=78%
GOBP_DEFENSE_RESPONSE_TO_GRAM_POSITIVE_BACTERIUM	GOBP_DEFENSE_RESPONSE_TO_GRAM_POSITIVE_BACTERIUM	75	0.593723	1.60471	0.00419287	0.0942722	0.997	2849	tags=47%, list=19%, signal=57%
GOBP_REGULATION_OF_CD4_POSITIVE_ALPHA_BETA_T_CELL_DIFFERENTIATION	GOBP_REGULATION_OF_CD4_POSITIVE_ALPHA_BETA_T_CELL_DIFFERENTIATION	46	0.669245	1.60467	0.0307377	0.0941363	0.997	3795	tags=65%, list=25%, signal=86%
GOBP_POSITIVE_REGULATION_OF_APOPTOTIC_SIGNALING_PATHWAY	GOBP_POSITIVE_REGULATION_OF_APOPTOTIC_SIGNALING_PATHWAY	116	0.421665	1.60466	0.0237624	0.0939855	0.997	2088	tags=18%, list=14%, signal=21%
GOBP_PHOSPHATIDYLINOSITOL_PHOSPHATE_BIOSYNTHETIC_PROCESS	GOBP_PHOSPHATIDYLINOSITOL_PHOSPHATE_BIOSYNTHETIC_PROCESS	60	0.414535	1.60463	0.0180723	0.0938417	0.997	4583	tags=40%, list=30%, signal=57%
GOBP_REGULATION_OF_BEHAVIOR	GOBP_REGULATION_OF_BEHAVIOR	62	0.55161	1.60404	0.002	0.094144	0.997	1528	tags=26%, list=10%, signal=29%
GOBP_NEGATIVE_REGULATION_OF_TOLL_LIKE_RECEPTOR_SIGNALING_PATHWAY	GOBP_NEGATIVE_REGULATION_OF_TOLL_LIKE_RECEPTOR_SIGNALING_PATHWAY	31	0.583047	1.604	0.030303	0.0939971	0.997	3737	tags=48%, list=24%, signal=64%
GOBP_VENTRICULAR_SEPTUM_DEVELOPMENT	GOBP_VENTRICULAR_SEPTUM_DEVELOPMENT	69	0.54365	1.60369	0.014	0.0941217	0.997	3596	tags=45%, list=23%, signal=58%
GOBP_POSITIVE_REGULATION_OF_MIRNA_TRANSCRIPTION	GOBP_POSITIVE_REGULATION_OF_MIRNA_TRANSCRIPTION	42	0.581269	1.60368	0.00792079	0.0939721	0.997	2955	tags=40%, list=19%, signal=50%
GOBP_REGULATION_OF_OSTEOCLAST_DIFFERENTIATION	GOBP_REGULATION_OF_OSTEOCLAST_DIFFERENTIATION	58	0.588588	1.60367	0.0204082	0.0938209	0.997	3423	tags=52%, list=22%, signal=66%
GOBP_PHOSPHATIDYLETHANOLAMINE_METABOLIC_PROCESS	GOBP_PHOSPHATIDYLETHANOLAMINE_METABOLIC_PROCESS	20	0.656524	1.60361	0.00578035	0.093706	0.997	3091	tags=50%, list=20%, signal=63%
GOBP_NITRIC_OXIDE_SYNTHASE_BIOSYNTHETIC_PROCESS	GOBP_NITRIC_OXIDE_SYNTHASE_BIOSYNTHETIC_PROCESS	19	0.711816	1.60325	0.0162933	0.0938068	0.997	2991	tags=63%, list=19%, signal=78%
GOBP_NEUTROPHIL_MEDIATED_IMMUNITY	GOBP_NEUTROPHIL_MEDIATED_IMMUNITY	36	0.63757	1.60302	0.0100806	0.0938439	0.997	2435	tags=44%, list=16%, signal=53%
GOBP_PEPTIDYL_TYROSINE_AUTOPHOSPHORYLATION	GOBP_PEPTIDYL_TYROSINE_AUTOPHOSPHORYLATION	21	0.604613	1.60292	0.0219124	0.0937848	0.997	2991	tags=48%, list=19%, signal=59%
GOBP_REGULATION_OF_MEMBRANE_INVAGINATION	GOBP_REGULATION_OF_MEMBRANE_INVAGINATION	15	0.738477	1.60264	0.00402414	0.0938334	0.997	2885	tags=73%, list=19%, signal=90%
GOBP_PURINERGIC_NUCLEOTIDE_RECEPTOR_SIGNALING_PATHWAY	GOBP_PURINERGIC_NUCLEOTIDE_RECEPTOR_SIGNALING_PATHWAY	30	0.700679	1.60236	0.00632911	0.0938807	0.997	3049	tags=63%, list=20%, signal=79%
GOBP_POSITIVE_REGULATION_OF_T_CELL_MIGRATION	GOBP_POSITIVE_REGULATION_OF_T_CELL_MIGRATION	28	0.658583	1.60211	0.0226337	0.0938854	0.997	2953	tags=50%, list=19%, signal=62%
GOBP_REGULATION_OF_GRANULOCYTE_CHEMOTAXIS	GOBP_REGULATION_OF_GRANULOCYTE_CHEMOTAXIS	46	0.609101	1.60185	0.00811359	0.0939653	0.997	3290	tags=54%, list=21%, signal=69%
GOBP_POLYSACCHARIDE_CATABOLIC_PROCESS	GOBP_POLYSACCHARIDE_CATABOLIC_PROCESS	18	0.630683	1.60178	0.0181452	0.0938599	0.997	2442	tags=33%, list=16%, signal=40%
GOBP_NEGATIVE_REGULATION_OF_HEMOPOIESIS	GOBP_NEGATIVE_REGULATION_OF_HEMOPOIESIS	95	0.52121	1.60158	0.0208768	0.0938501	0.997	3806	tags=46%, list=25%, signal=61%
GOBP_RECEPTOR_SIGNALING_PATHWAY_VIA_STAT	GOBP_RECEPTOR_SIGNALING_PATHWAY_VIA_STAT	158	0.489007	1.60149	0.00591716	0.0937984	0.997	3251	tags=35%, list=21%, signal=44%
GOBP_REGULATION_OF_FAT_CELL_DIFFERENTIATION	GOBP_REGULATION_OF_FAT_CELL_DIFFERENTIATION	119	0.472337	1.60143	0.00204918	0.0936973	0.997	4753	tags=50%, list=31%, signal=72%
GOBP_ACTIVATION_OF_PROTEIN_KINASE_B_ACTIVITY	GOBP_ACTIVATION_OF_PROTEIN_KINASE_B_ACTIVITY	27	0.602939	1.60126	0.0216963	0.0936663	0.997	2953	tags=37%, list=19%, signal=46%
GOBP_POSITIVE_REGULATION_OF_RESPONSE_TO_BIOTIC_STIMULUS	GOBP_POSITIVE_REGULATION_OF_RESPONSE_TO_BIOTIC_STIMULUS	156	0.536767	1.60119	0.0344828	0.0935813	0.997	3845	tags=46%, list=25%, signal=60%
GOBP_NEGATIVE_REGULATION_OF_INFLAMMATORY_RESPONSE_TO_ANTIGENIC_STIMULUS	GOBP_NEGATIVE_REGULATION_OF_INFLAMMATORY_RESPONSE_TO_ANTIGENIC_STIMULUS	24	0.648132	1.60107	0.0221774	0.093497	0.997	2035	tags=38%, list=13%, signal=43%
GOBP_REGULATION_OF_REACTIVE_OXYGEN_SPECIES_METABOLIC_PROCESS	GOBP_REGULATION_OF_REACTIVE_OXYGEN_SPECIES_METABOLIC_PROCESS	127	0.448779	1.6004	0.00798403	0.0938657	0.997	3295	tags=35%, list=21%, signal=45%
GOBP_CIRCADIAN_SLEEP_WAKE_CYCLE_SLEEP	GOBP_CIRCADIAN_SLEEP_WAKE_CYCLE_SLEEP	16	0.685569	1.6003	0.0163265	0.0937863	0.997	1462	tags=38%, list=10%, signal=41%
GOBP_POSITIVE_REGULATION_OF_ENDOTHELIAL_CELL_PROLIFERATION	GOBP_POSITIVE_REGULATION_OF_ENDOTHELIAL_CELL_PROLIFERATION	86	0.576916	1.60025	0.0164609	0.093654	0.997	3409	tags=45%, list=22%, signal=58%
GOBP_NEGATIVE_REGULATION_OF_TRANSFORMING_GROWTH_FACTOR_BETA_RECEPTOR_SIGNALING_PATHWAY	GOBP_NEGATIVE_REGULATION_OF_TRANSFORMING_GROWTH_FACTOR_BETA_RECEPTOR_SIGNALING_PATHWAY	70	0.50004	1.59953	0.0184049	0.0940431	0.997	3385	tags=33%, list=22%, signal=42%
GOBP_B_CELL_ACTIVATION_INVOLVED_IN_IMMUNE_RESPONSE	GOBP_B_CELL_ACTIVATION_INVOLVED_IN_IMMUNE_RESPONSE	78	0.566651	1.59924	0.0342742	0.0940949	0.997	2605	tags=38%, list=17%, signal=46%
GOBP_POSITIVE_REGULATION_OF_ACTIVATED_T_CELL_PROLIFERATION	GOBP_POSITIVE_REGULATION_OF_ACTIVATED_T_CELL_PROLIFERATION	24	0.705659	1.59923	0.010101	0.0939446	0.997	2124	tags=50%, list=14%, signal=58%
GOBP_REGULATION_OF_COMPLEMENT_ACTIVATION	GOBP_REGULATION_OF_COMPLEMENT_ACTIVATION	20	0.699701	1.59915	0.0181452	0.0938616	0.997	3160	tags=70%, list=21%, signal=88%
GOBP_SMOOTH_MUSCLE_CELL_MIGRATION	GOBP_SMOOTH_MUSCLE_CELL_MIGRATION	64	0.536837	1.59905	0.0199203	0.0937792	0.997	3430	tags=41%, list=22%, signal=52%
GOBP_ENGULFMENT_OF_APOPTOTIC_CELL	GOBP_ENGULFMENT_OF_APOPTOTIC_CELL	16	0.6608	1.5985	0.011976	0.0940083	0.997	3126	tags=50%, list=20%, signal=63%
GOBP_REGULATION_OF_CATION_TRANSMEMBRANE_TRANSPORT	GOBP_REGULATION_OF_CATION_TRANSMEMBRANE_TRANSPORT	303	0.485991	1.5983	0	0.0940021	0.997	3093	tags=36%, list=20%, signal=45%
GOBP_REGULATION_OF_RELEASE_OF_SEQUESTERED_CALCIUM_ION_INTO_CYTOSOL	GOBP_REGULATION_OF_RELEASE_OF_SEQUESTERED_CALCIUM_ION_INTO_CYTOSOL	70	0.565099	1.59824	0.00194553	0.0938863	0.997	3845	tags=56%, list=25%, signal=74%
GOBP_NEGATIVE_REGULATION_OF_BLOOD_VESSEL_ENDOTHELIAL_CELL_MIGRATION	GOBP_NEGATIVE_REGULATION_OF_BLOOD_VESSEL_ENDOTHELIAL_CELL_MIGRATION	34	0.585472	1.59779	0.0300601	0.0940727	0.997	3021	tags=44%, list=20%, signal=55%
GOBP_POSITIVE_REGULATION_OF_SIGNALING_RECEPTOR_ACTIVITY	GOBP_POSITIVE_REGULATION_OF_SIGNALING_RECEPTOR_ACTIVITY	41	0.588296	1.59776	0.0123711	0.0939569	0.997	3288	tags=44%, list=21%, signal=56%
GOBP_REGULATION_OF_INTRACELLULAR_PROTEIN_TRANSPORT	GOBP_REGULATION_OF_INTRACELLULAR_PROTEIN_TRANSPORT	198	0.328695	1.59697	0.0123711	0.0943761	0.997	3568	tags=23%, list=23%, signal=30%
GOBP_POSITIVE_REGULATION_OF_LEUKOCYTE_DEGRANULATION	GOBP_POSITIVE_REGULATION_OF_LEUKOCYTE_DEGRANULATION	24	0.610716	1.59657	0.0124224	0.0945912	0.997	4372	tags=58%, list=28%, signal=81%
GOBP_POSITIVE_REGULATION_OF_CALCIUM_ION_TRANSPORT_INTO_CYTOSOL	GOBP_POSITIVE_REGULATION_OF_CALCIUM_ION_TRANSPORT_INTO_CYTOSOL	50	0.58726	1.59653	0.0038835	0.0944922	0.997	3361	tags=52%, list=22%, signal=66%
GOBP_REGULATION_OF_LONG_TERM_SYNAPTIC_POTENTIATION	GOBP_REGULATION_OF_LONG_TERM_SYNAPTIC_POTENTIATION	41	0.615677	1.59615	0.00200803	0.0946022	0.997	3002	tags=46%, list=20%, signal=57%
GOBP_SUPEROXIDE_METABOLIC_PROCESS	GOBP_SUPEROXIDE_METABOLIC_PROCESS	62	0.550888	1.59577	0.00601202	0.0947953	0.998	2756	tags=40%, list=18%, signal=49%
GOBP_NEGATIVE_REGULATION_OF_TRANSPORTER_ACTIVITY	GOBP_NEGATIVE_REGULATION_OF_TRANSPORTER_ACTIVITY	68	0.545542	1.59564	0.00607287	0.0947533	0.998	1711	tags=26%, list=11%, signal=30%
GOBP_LEUKOCYTE_MIGRATION_INVOLVED_IN_INFLAMMATORY_RESPONSE	GOBP_LEUKOCYTE_MIGRATION_INVOLVED_IN_INFLAMMATORY_RESPONSE	19	0.751619	1.59514	0.00198413	0.0949365	0.998	1636	tags=58%, list=11%, signal=65%
GOBP_POSITIVE_REGULATION_OF_FILOPODIUM_ASSEMBLY	GOBP_POSITIVE_REGULATION_OF_FILOPODIUM_ASSEMBLY	24	0.590148	1.59513	0.0263158	0.0947934	0.998	3317	tags=38%, list=22%, signal=48%
GOBP_FILOPODIUM_ASSEMBLY	GOBP_FILOPODIUM_ASSEMBLY	57	0.489122	1.59502	0.00819672	0.0947318	0.998	3317	tags=33%, list=22%, signal=42%
GOBP_POSITIVE_REGULATION_OF_PEPTIDYL_SERINE_PHOSPHORYLATION	GOBP_POSITIVE_REGULATION_OF_PEPTIDYL_SERINE_PHOSPHORYLATION	98	0.479156	1.59458	0.00202429	0.0949085	0.998	2707	tags=30%, list=18%, signal=36%
GOBP_NEGATIVE_REGULATION_OF_SMOOTH_MUSCLE_CELL_PROLIFERATION	GOBP_NEGATIVE_REGULATION_OF_SMOOTH_MUSCLE_CELL_PROLIFERATION	50	0.616186	1.59411	0.00596422	0.0951251	0.998	4729	tags=68%, list=31%, signal=98%
GOBP_POSITIVE_REGULATION_OF_CD4_POSITIVE_ALPHA_BETA_T_CELL_DIFFERENTIATION	GOBP_POSITIVE_REGULATION_OF_CD4_POSITIVE_ALPHA_BETA_T_CELL_DIFFERENTIATION	29	0.699842	1.59382	0.020284	0.095213	0.998	3795	tags=76%, list=25%, signal=101%
GOBP_COMPLEMENT_ACTIVATION	GOBP_COMPLEMENT_ACTIVATION	53	0.662931	1.59361	0.00420168	0.0952113	0.998	3254	tags=60%, list=21%, signal=76%
GOBP_REGULATION_OF_ANION_TRANSMEMBRANE_TRANSPORT	GOBP_REGULATION_OF_ANION_TRANSMEMBRANE_TRANSPORT	22	0.624696	1.59351	0.00631579	0.0951384	0.998	3897	tags=55%, list=25%, signal=73%
GOBP_AMEBOIDAL_TYPE_CELL_MIGRATION	GOBP_AMEBOIDAL_TYPE_CELL_MIGRATION	394	0.441542	1.59297	0.00198807	0.0954094	0.998	3409	tags=36%, list=22%, signal=44%
GOBP_SKELETAL_MUSCLE_CONTRACTION	GOBP_SKELETAL_MUSCLE_CONTRACTION	39	0.633657	1.59274	0.00573614	0.0954294	0.998	2843	tags=46%, list=19%, signal=56%
GOBP_POSITIVE_REGULATION_OF_ERYTHROCYTE_DIFFERENTIATION	GOBP_POSITIVE_REGULATION_OF_ERYTHROCYTE_DIFFERENTIATION	28	0.467668	1.59168	0.0509554	0.0960895	0.999	3543	tags=25%, list=23%, signal=32%
GOBP_REGULATION_OF_HUMORAL_IMMUNE_RESPONSE	GOBP_REGULATION_OF_HUMORAL_IMMUNE_RESPONSE	42	0.667483	1.59137	0.0040568	0.096166	0.999	3160	tags=64%, list=21%, signal=81%
GOBP_MYELOID_LEUKOCYTE_CYTOKINE_PRODUCTION	GOBP_MYELOID_LEUKOCYTE_CYTOKINE_PRODUCTION	30	0.567377	1.59081	0.0263692	0.0964564	0.999	3875	tags=50%, list=25%, signal=67%
GOBP_POSITIVE_REGULATION_OF_UBIQUITIN_DEPENDENT_PROTEIN_CATABOLIC_PROCESS	GOBP_POSITIVE_REGULATION_OF_UBIQUITIN_DEPENDENT_PROTEIN_CATABOLIC_PROCESS	99	0.335826	1.59066	0.0158103	0.0964083	0.999	2006	tags=15%, list=13%, signal=17%
GOBP_TRANSPORT_OF_VIRUS	GOBP_TRANSPORT_OF_VIRUS	18	0.555895	1.5898	0.0524194	0.0969325	0.999	3134	tags=44%, list=20%, signal=56%
GOBP_POSITIVE_REGULATION_OF_INTERLEUKIN_12_PRODUCTION	GOBP_POSITIVE_REGULATION_OF_INTERLEUKIN_12_PRODUCTION	40	0.671289	1.58972	0.0198807	0.0968445	0.999	2605	tags=52%, list=17%, signal=63%
GOBP_INTERLEUKIN_12_PRODUCTION	GOBP_INTERLEUKIN_12_PRODUCTION	60	0.667803	1.58941	0.0264766	0.0969165	0.999	2939	tags=58%, list=19%, signal=72%
GOBP_MYD88_DEPENDENT_TOLL_LIKE_RECEPTOR_SIGNALING_PATHWAY	GOBP_MYD88_DEPENDENT_TOLL_LIKE_RECEPTOR_SIGNALING_PATHWAY	24	0.66766	1.58941	0.035124	0.0967715	0.999	3285	tags=58%, list=21%, signal=74%
GOBP_NEGATIVE_REGULATION_OF_CYSTEINE_TYPE_ENDOPEPTIDASE_ACTIVITY	GOBP_NEGATIVE_REGULATION_OF_CYSTEINE_TYPE_ENDOPEPTIDASE_ACTIVITY	76	0.485735	1.58936	0.0246914	0.0966546	0.999	3203	tags=37%, list=21%, signal=46%
GOBP_RENAL_SYSTEM_VASCULATURE_DEVELOPMENT	GOBP_RENAL_SYSTEM_VASCULATURE_DEVELOPMENT	29	0.657455	1.58922	0.0232068	0.0966099	0.999	3419	tags=62%, list=22%, signal=80%
GOBP_REGULATION_OF_MACROAUTOPHAGY	GOBP_REGULATION_OF_MACROAUTOPHAGY	149	0.294353	1.58866	0.0263158	0.0968341	0.999	3593	tags=18%, list=23%, signal=23%
GOBP_NEGATIVE_REGULATION_OF_CELL_KILLING	GOBP_NEGATIVE_REGULATION_OF_CELL_KILLING	23	0.70554	1.58849	0.0189873	0.0968166	0.999	3459	tags=65%, list=23%, signal=84%
GOBP_NEGATIVE_REGULATION_OF_PEPTIDYL_LYSINE_ACETYLATION	GOBP_NEGATIVE_REGULATION_OF_PEPTIDYL_LYSINE_ACETYLATION	19	0.551926	1.58844	0.0293501	0.0966935	0.999	2702	tags=26%, list=18%, signal=32%
GOBP_ENDOCYTIC_RECYCLING	GOBP_ENDOCYTIC_RECYCLING	62	0.370427	1.58837	0.0452675	0.0965958	0.999	5704	tags=44%, list=37%, signal=69%
GOBP_POSITIVE_REGULATION_OF_ION_TRANSMEMBRANE_TRANSPORT	GOBP_POSITIVE_REGULATION_OF_ION_TRANSMEMBRANE_TRANSPORT	139	0.521229	1.58836	0	0.0964488	0.999	2995	tags=42%, list=20%, signal=51%
GOBP_NEGATIVE_REGULATION_OF_CELL_SUBSTRATE_ADHESION	GOBP_NEGATIVE_REGULATION_OF_CELL_SUBSTRATE_ADHESION	56	0.514353	1.58813	0.0168067	0.0964334	0.999	2101	tags=25%, list=14%, signal=29%
GOBP_REGULATION_OF_GLYCOLYTIC_PROCESS	GOBP_REGULATION_OF_GLYCOLYTIC_PROCESS	43	0.491967	1.58804	0.0146444	0.0963595	0.999	2766	tags=28%, list=18%, signal=34%
GOBP_AMYLOID_PRECURSOR_PROTEIN_CATABOLIC_PROCESS	GOBP_AMYLOID_PRECURSOR_PROTEIN_CATABOLIC_PROCESS	51	0.453946	1.58802	0.0186335	0.0962201	0.999	3209	tags=31%, list=21%, signal=40%
GOBP_INTERFERON_ALPHA_PRODUCTION	GOBP_INTERFERON_ALPHA_PRODUCTION	27	0.639949	1.58801	0.0413223	0.0960966	0.999	2323	tags=37%, list=15%, signal=44%
GOBP_NEGATIVE_REGULATION_OF_ION_TRANSMEMBRANE_TRANSPORT	GOBP_NEGATIVE_REGULATION_OF_ION_TRANSMEMBRANE_TRANSPORT	79	0.529393	1.588	0.00617284	0.095964	0.999	3627	tags=41%, list=24%, signal=53%
GOBP_POSITIVE_REGULATION_OF_PHOSPHOPROTEIN_PHOSPHATASE_ACTIVITY	GOBP_POSITIVE_REGULATION_OF_PHOSPHOPROTEIN_PHOSPHATASE_ACTIVITY	20	0.621646	1.58794	0.0288066	0.0958686	0.999	3538	tags=50%, list=23%, signal=65%
GOBP_MYELOID_DENDRITIC_CELL_ACTIVATION	GOBP_MYELOID_DENDRITIC_CELL_ACTIVATION	26	0.720333	1.58785	0.0209205	0.0957884	0.999	2458	tags=58%, list=16%, signal=69%
GOBP_PRODUCTION_OF_MOLECULAR_MEDIATOR_INVOLVED_IN_INFLAMMATORY_RESPONSE	GOBP_PRODUCTION_OF_MOLECULAR_MEDIATOR_INVOLVED_IN_INFLAMMATORY_RESPONSE	78	0.560358	1.58755	0.0379747	0.0958968	0.999	3098	tags=45%, list=20%, signal=56%
GOBP_POSITIVE_REGULATION_OF_PRODUCTION_OF_MOLECULAR_MEDIATOR_OF_IMMUNE_RESPONSE	GOBP_POSITIVE_REGULATION_OF_PRODUCTION_OF_MOLECULAR_MEDIATOR_OF_IMMUNE_RESPONSE	108	0.540192	1.58754	0.0360721	0.0957549	0.999	3875	tags=48%, list=25%, signal=64%
GOBP_INOSITOL_PHOSPHATE_BIOSYNTHETIC_PROCESS	GOBP_INOSITOL_PHOSPHATE_BIOSYNTHETIC_PROCESS	27	0.628969	1.58737	0.0118812	0.0957258	0.999	2605	tags=41%, list=17%, signal=49%
GOBP_HORMONE_MEDIATED_SIGNALING_PATHWAY	GOBP_HORMONE_MEDIATED_SIGNALING_PATHWAY	172	0.422672	1.58737	0.00609756	0.0955825	0.999	5057	tags=41%, list=33%, signal=60%
GOBP_NEGATIVE_REGULATION_OF_TRANSFERASE_ACTIVITY	GOBP_NEGATIVE_REGULATION_OF_TRANSFERASE_ACTIVITY	236	0.38202	1.58713	0.00603622	0.0956293	0.999	4669	tags=42%, list=30%, signal=59%
GOBP_PLATELET_DERIVED_GROWTH_FACTOR_RECEPTOR_SIGNALING_PATHWAY	GOBP_PLATELET_DERIVED_GROWTH_FACTOR_RECEPTOR_SIGNALING_PATHWAY	52	0.489851	1.58701	0.0357143	0.0955989	0.999	4545	tags=50%, list=30%, signal=71%
GOBP_MUSCLE_CELL_CELLULAR_HOMEOSTASIS	GOBP_MUSCLE_CELL_CELLULAR_HOMEOSTASIS	19	0.607963	1.58693	0.0298211	0.0955073	0.999	3978	tags=53%, list=26%, signal=71%
GOBP_DOPAMINE_RECEPTOR_SIGNALING_PATHWAY	GOBP_DOPAMINE_RECEPTOR_SIGNALING_PATHWAY	36	0.521807	1.58679	0.0140281	0.0954574	0.999	3646	tags=42%, list=24%, signal=55%
GOBP_ACUTE_INFLAMMATORY_RESPONSE_TO_ANTIGENIC_STIMULUS	GOBP_ACUTE_INFLAMMATORY_RESPONSE_TO_ANTIGENIC_STIMULUS	21	0.727988	1.58673	0.01	0.0953596	0.999	3160	tags=57%, list=21%, signal=72%
GOBP_RECEPTOR_METABOLIC_PROCESS	GOBP_RECEPTOR_METABOLIC_PROCESS	152	0.421471	1.58649	0.0103306	0.0953989	0.999	3747	tags=30%, list=24%, signal=40%
GOBP_LYMPHOCYTE_APOPTOTIC_PROCESS	GOBP_LYMPHOCYTE_APOPTOTIC_PROCESS	71	0.532667	1.58594	0.0347648	0.0957315	0.999	3583	tags=42%, list=23%, signal=55%
GOBP_REGULATION_OF_CELLULAR_EXTRAVASATION	GOBP_REGULATION_OF_CELLULAR_EXTRAVASATION	38	0.632564	1.58587	0.012	0.0956391	0.999	3313	tags=58%, list=22%, signal=74%
GOBP_ANTIGEN_PROCESSING_AND_PRESENTATION_OF_EXOGENOUS_PEPTIDE_ANTIGEN_VIA_MHC_CLASS_II	GOBP_ANTIGEN_PROCESSING_AND_PRESENTATION_OF_EXOGENOUS_PEPTIDE_ANTIGEN_VIA_MHC_CLASS_II	23	0.716145	1.58586	0.0143737	0.0954993	0.999	3871	tags=83%, list=25%, signal=110%
GOBP_REGULATION_OF_CARDIAC_MUSCLE_CONTRACTION_BY_CALCIUM_ION_SIGNALING	GOBP_REGULATION_OF_CARDIAC_MUSCLE_CONTRACTION_BY_CALCIUM_ION_SIGNALING	23	0.682349	1.58568	0.012	0.0955151	0.999	3556	tags=61%, list=23%, signal=79%
GOBP_VASCULAR_ASSOCIATED_SMOOTH_MUSCLE_CELL_PROLIFERATION	GOBP_VASCULAR_ASSOCIATED_SMOOTH_MUSCLE_CELL_PROLIFERATION	52	0.58196	1.58565	0.00994036	0.0953854	0.999	3236	tags=44%, list=21%, signal=56%
GOBP_MACROPHAGE_ACTIVATION_INVOLVED_IN_IMMUNE_RESPONSE	GOBP_MACROPHAGE_ACTIVATION_INVOLVED_IN_IMMUNE_RESPONSE	18	0.711674	1.58502	0.0121212	0.095734	0.999	3109	tags=78%, list=20%, signal=97%
GOBP_RESPONSE_TO_MECHANICAL_STIMULUS	GOBP_RESPONSE_TO_MECHANICAL_STIMULUS	187	0.474251	1.58404	0.00610998	0.0964582	0.999	2843	tags=36%, list=19%, signal=44%
GOBP_CELL_ADHESION_MEDIATED_BY_INTEGRIN	GOBP_CELL_ADHESION_MEDIATED_BY_INTEGRIN	80	0.560462	1.58358	0.0162933	0.0966791	0.999	3822	tags=54%, list=25%, signal=71%
GOBP_REGULATION_OF_PROTEIN_CONTAINING_COMPLEX_DISASSEMBLY	GOBP_REGULATION_OF_PROTEIN_CONTAINING_COMPLEX_DISASSEMBLY	108	0.425731	1.58349	0.0200401	0.0965771	0.999	4649	tags=45%, list=30%, signal=65%
GOBP_NEGATIVE_REGULATION_OF_LEUKOCYTE_PROLIFERATION	GOBP_NEGATIVE_REGULATION_OF_LEUKOCYTE_PROLIFERATION	81	0.606334	1.58315	0.0355649	0.0966994	0.999	3358	tags=57%, list=22%, signal=72%
GOBP_POSITIVE_REGULATION_OF_ACTIN_CYTOSKELETON_REORGANIZATION	GOBP_POSITIVE_REGULATION_OF_ACTIN_CYTOSKELETON_REORGANIZATION	19	0.641997	1.58312	0.0243902	0.0965761	0.999	1845	tags=37%, list=12%, signal=42%
GOBP_REGULATION_OF_T_CELL_MEDIATED_CYTOTOXICITY	GOBP_REGULATION_OF_T_CELL_MEDIATED_CYTOTOXICITY	34	0.729391	1.58301	0.00621118	0.0965179	0.999	1916	tags=56%, list=12%, signal=64%
GOBP_POSITIVE_REGULATION_OF_TYPE_I_INTERFERON_PRODUCTION	GOBP_POSITIVE_REGULATION_OF_TYPE_I_INTERFERON_PRODUCTION	55	0.495779	1.58284	0.0814196	0.0965236	0.999	2605	tags=27%, list=17%, signal=33%
GOBP_ENDOTHELIAL_CELL_DEVELOPMENT	GOBP_ENDOTHELIAL_CELL_DEVELOPMENT	66	0.487408	1.58275	0.020202	0.096448	0.999	3899	tags=47%, list=25%, signal=63%
GOBP_FOCAL_ADHESION_ASSEMBLY	GOBP_FOCAL_ADHESION_ASSEMBLY	81	0.466282	1.58222	0.0356436	0.0967205	0.999	4817	tags=46%, list=31%, signal=66%
GOBP_REGULATION_OF_PROTEIN_POLYMERIZATION	GOBP_REGULATION_OF_PROTEIN_POLYMERIZATION	179	0.407812	1.58217	0.00604839	0.0966057	0.999	4267	tags=39%, list=28%, signal=53%
GOBP_POSITIVE_REGULATION_OF_T_CELL_CYTOKINE_PRODUCTION	GOBP_POSITIVE_REGULATION_OF_T_CELL_CYTOKINE_PRODUCTION	25	0.682334	1.58178	0.0262626	0.0967869	0.999	2642	tags=52%, list=17%, signal=63%
GOBP_NEGATIVE_REGULATION_OF_PHAGOCYTOSIS	GOBP_NEGATIVE_REGULATION_OF_PHAGOCYTOSIS	19	0.604729	1.58141	0.0364372	0.0969488	0.999	3320	tags=53%, list=22%, signal=67%
GOBP_POSITIVE_REGULATION_OF_LYMPHOCYTE_MIGRATION	GOBP_POSITIVE_REGULATION_OF_LYMPHOCYTE_MIGRATION	32	0.663837	1.58141	0.0195652	0.0968089	0.999	2532	tags=50%, list=16%, signal=60%
GOBP_MEMBRANE_DEPOLARIZATION_DURING_CARDIAC_MUSCLE_CELL_ACTION_POTENTIAL	GOBP_MEMBRANE_DEPOLARIZATION_DURING_CARDIAC_MUSCLE_CELL_ACTION_POTENTIAL	21	0.733215	1.58125	0.0102041	0.0967736	0.999	2387	tags=52%, list=16%, signal=62%
GOBP_CELL_COMMUNICATION_BY_ELECTRICAL_COUPLING	GOBP_CELL_COMMUNICATION_BY_ELECTRICAL_COUPLING	32	0.637111	1.58118	0.012	0.0966859	0.999	3717	tags=59%, list=24%, signal=78%
GOBP_POSITIVE_REGULATION_OF_BIOMINERALIZATION	GOBP_POSITIVE_REGULATION_OF_BIOMINERALIZATION	47	0.582551	1.58099	0.00200401	0.0967194	0.999	3596	tags=49%, list=23%, signal=64%
GOBP_POSITIVE_REGULATION_OF_VASCULAR_ASSOCIATED_SMOOTH_MUSCLE_CELL_PROLIFERATION	GOBP_POSITIVE_REGULATION_OF_VASCULAR_ASSOCIATED_SMOOTH_MUSCLE_CELL_PROLIFERATION	31	0.618909	1.58093	0.0100806	0.0966314	0.999	3186	tags=52%, list=21%, signal=65%
GOBP_PROTEIN_TARGETING_TO_LYSOSOME	GOBP_PROTEIN_TARGETING_TO_LYSOSOME	22	0.422082	1.58044	0.0432099	0.0968827	0.999	5939	tags=64%, list=39%, signal=104%
GOBP_REGULATION_OF_TRANSMEMBRANE_TRANSPORT	GOBP_REGULATION_OF_TRANSMEMBRANE_TRANSPORT	499	0.467444	1.58035	0	0.0968297	0.999	3737	tags=39%, list=24%, signal=50%
GOBP_POSITIVE_REGULATION_OF_MYELOID_LEUKOCYTE_MEDIATED_IMMUNITY	GOBP_POSITIVE_REGULATION_OF_MYELOID_LEUKOCYTE_MEDIATED_IMMUNITY	20	0.681606	1.58033	0.0224033	0.0967106	0.999	1416	tags=40%, list=9%, signal=44%
GOBP_REGULATION_OF_REACTIVE_OXYGEN_SPECIES_BIOSYNTHETIC_PROCESS	GOBP_REGULATION_OF_REACTIVE_OXYGEN_SPECIES_BIOSYNTHETIC_PROCESS	36	0.527777	1.57973	0.0218254	0.0970249	0.999	3114	tags=33%, list=20%, signal=42%
GOBP_SEMI_LUNAR_VALVE_DEVELOPMENT	GOBP_SEMI_LUNAR_VALVE_DEVELOPMENT	41	0.609512	1.57947	0.0226337	0.0971065	0.999	3832	tags=56%, list=25%, signal=75%
GOBP_DEFINITIVE_HEMOPOIESIS	GOBP_DEFINITIVE_HEMOPOIESIS	19	0.645157	1.57931	0.0278884	0.0970644	0.999	2871	tags=42%, list=19%, signal=52%
GOBP_BLOOD_VESSEL_ENDOTHELIAL_CELL_PROLIFERATION_INVOLVED_IN_SPROUTING_ANGIOGENESIS	GOBP_BLOOD_VESSEL_ENDOTHELIAL_CELL_PROLIFERATION_INVOLVED_IN_SPROUTING_ANGIOGENESIS	22	0.742644	1.57887	0.013834	0.0972165	0.999	2871	tags=68%, list=19%, signal=84%
GOBP_REGULATION_OF_MACROPHAGE_DERIVED_FOAM_CELL_DIFFERENTIATION	GOBP_REGULATION_OF_MACROPHAGE_DERIVED_FOAM_CELL_DIFFERENTIATION	31	0.677941	1.57876	0.00788955	0.0971756	0.999	4372	tags=77%, list=28%, signal=108%
GOBP_POSITIVE_REGULATION_OF_INNATE_IMMUNE_RESPONSE	GOBP_POSITIVE_REGULATION_OF_INNATE_IMMUNE_RESPONSE	122	0.561535	1.57853	0.0431211	0.097209	0.999	3358	tags=41%, list=22%, signal=52%
GOBP_DETECTION_OF_EXTERNAL_BIOTIC_STIMULUS	GOBP_DETECTION_OF_EXTERNAL_BIOTIC_STIMULUS	21	0.677872	1.57797	0.030303	0.097494	0.999	3487	tags=67%, list=23%, signal=86%
GOBP_POSITIVE_REGULATION_OF_DEFENSE_RESPONSE_TO_VIRUS_BY_HOST	GOBP_POSITIVE_REGULATION_OF_DEFENSE_RESPONSE_TO_VIRUS_BY_HOST	27	0.625969	1.57767	0.0447154	0.0975629	0.999	4606	tags=63%, list=30%, signal=90%
GOBP_CELLULAR_RESPONSE_TO_VASCULAR_ENDOTHELIAL_GROWTH_FACTOR_STIMULUS	GOBP_CELLULAR_RESPONSE_TO_VASCULAR_ENDOTHELIAL_GROWTH_FACTOR_STIMULUS	58	0.549764	1.57765	0.0141414	0.0974364	0.999	3854	tags=45%, list=25%, signal=60%
GOBP_NEGATIVE_REGULATION_OF_HUMORAL_IMMUNE_RESPONSE	GOBP_NEGATIVE_REGULATION_OF_HUMORAL_IMMUNE_RESPONSE	16	0.748024	1.57728	0.0238095	0.0975547	0.999	3160	tags=81%, list=21%, signal=102%
GOBP_DENDRITIC_CELL_MIGRATION	GOBP_DENDRITIC_CELL_MIGRATION	31	0.753261	1.57711	0.0127119	0.0975322	0.999	1793	tags=55%, list=12%, signal=62%
GOBP_HEMOSTASIS	GOBP_HEMOSTASIS	213	0.509697	1.57663	0.013834	0.0977221	0.999	3122	tags=40%, list=20%, signal=50%
GOBP_REGULATION_OF_CARBOHYDRATE_CATABOLIC_PROCESS	GOBP_REGULATION_OF_CARBOHYDRATE_CATABOLIC_PROCESS	52	0.449274	1.57632	0.0105932	0.0978185	0.999	2766	tags=23%, list=18%, signal=28%
GOBP_ANATOMICAL_STRUCTURE_HOMEOSTASIS	GOBP_ANATOMICAL_STRUCTURE_HOMEOSTASIS	291	0.4649	1.57596	0	0.0979797	0.999	3850	tags=39%, list=25%, signal=51%
GOBP_T_HELPER_17_TYPE_IMMUNE_RESPONSE	GOBP_T_HELPER_17_TYPE_IMMUNE_RESPONSE	38	0.639931	1.57559	0.022869	0.0980751	0.999	2705	tags=50%, list=18%, signal=61%
GOBP_GRANULOCYTE_CHEMOTAXIS	GOBP_GRANULOCYTE_CHEMOTAXIS	107	0.622872	1.57528	0.0164609	0.0981597	0.999	2998	tags=53%, list=20%, signal=66%
GOBP_PROTEIN_DEPHOSPHORYLATION	GOBP_PROTEIN_DEPHOSPHORYLATION	261	0.353345	1.57525	0.00413223	0.0980501	0.999	4650	tags=36%, list=30%, signal=51%
GOBP_EPITHELIAL_TO_MESENCHYMAL_TRANSITION_INVOLVED_IN_ENDOCARDIAL_CUSHION_FORMATION	GOBP_EPITHELIAL_TO_MESENCHYMAL_TRANSITION_INVOLVED_IN_ENDOCARDIAL_CUSHION_FORMATION	20	0.649878	1.57514	0.0283976	0.0979982	0.999	4533	tags=70%, list=30%, signal=99%
GOBP_GLIAL_CELL_MIGRATION	GOBP_GLIAL_CELL_MIGRATION	45	0.558935	1.5749	0.0140281	0.0980515	0.999	2096	tags=33%, list=14%, signal=38%
GOBP_POSITIVE_REGULATION_OF_ALPHA_BETA_T_CELL_PROLIFERATION	GOBP_POSITIVE_REGULATION_OF_ALPHA_BETA_T_CELL_PROLIFERATION	21	0.75791	1.57409	0.0218254	0.0985354	0.999	2207	tags=67%, list=14%, signal=78%
GOBP_NEGATIVE_REGULATION_OF_TRANSPORT	GOBP_NEGATIVE_REGULATION_OF_TRANSPORT	380	0.438621	1.57336	0.0040404	0.0989835	0.999	3361	tags=30%, list=22%, signal=38%
GOBP_INFLAMMATORY_RESPONSE_TO_WOUNDING	GOBP_INFLAMMATORY_RESPONSE_TO_WOUNDING	15	0.73514	1.57316	0.0143149	0.0989759	0.999	3361	tags=67%, list=22%, signal=85%
GOBP_NEGATIVE_REGULATION_OF_PROTEIN_DEPHOSPHORYLATION	GOBP_NEGATIVE_REGULATION_OF_PROTEIN_DEPHOSPHORYLATION	31	0.511035	1.57281	0.037037	0.0991102	0.999	3207	tags=29%, list=21%, signal=37%
GOBP_REGULATION_OF_ION_TRANSMEMBRANE_TRANSPORT	GOBP_REGULATION_OF_ION_TRANSMEMBRANE_TRANSPORT	422	0.479087	1.57223	0	0.0994359	0.999	3737	tags=41%, list=24%, signal=52%
GOBP_REGULATION_OF_PROTEIN_LOCALIZATION_TO_CELL_SURFACE	GOBP_REGULATION_OF_PROTEIN_LOCALIZATION_TO_CELL_SURFACE	37	0.538906	1.57219	0.024	0.0993243	0.999	1854	tags=24%, list=12%, signal=28%
GOBP_POSITIVE_REGULATION_OF_CELL_KILLING	GOBP_POSITIVE_REGULATION_OF_CELL_KILLING	57	0.700356	1.57212	0.0219561	0.0992257	0.999	2018	tags=54%, list=13%, signal=62%
GOBP_NEGATIVE_REGULATION_OF_CELL_MATRIX_ADHESION	GOBP_NEGATIVE_REGULATION_OF_CELL_MATRIX_ADHESION	33	0.558955	1.5719	0.0169851	0.0992377	0.999	2101	tags=27%, list=14%, signal=32%
GOBP_NEGATIVE_REGULATION_OF_LEUKOCYTE_MIGRATION	GOBP_NEGATIVE_REGULATION_OF_LEUKOCYTE_MIGRATION	37	0.669854	1.57171	0.0144628	0.0992343	0.999	2927	tags=59%, list=19%, signal=73%
GOBP_GRANULOCYTE_MIGRATION	GOBP_GRANULOCYTE_MIGRATION	134	0.59261	1.57117	0.0184426	0.0995346	0.999	3581	tags=55%, list=23%, signal=71%
GOBP_ADENYLATE_CYCLASE_ACTIVATING_ADRENERGIC_RECEPTOR_SIGNALING_PATHWAY	GOBP_ADENYLATE_CYCLASE_ACTIVATING_ADRENERGIC_RECEPTOR_SIGNALING_PATHWAY	24	0.657211	1.57102	0.0162602	0.099522	0.999	2736	tags=50%, list=18%, signal=61%
GOBP_REGULATION_OF_STRESS_ACTIVATED_PROTEIN_KINASE_SIGNALING_CASCADE	GOBP_REGULATION_OF_STRESS_ACTIVATED_PROTEIN_KINASE_SIGNALING_CASCADE	188	0.447207	1.57082	0.00608519	0.0995551	0.999	3437	tags=35%, list=22%, signal=44%
GOBP_REGULATION_OF_NEUTROPHIL_MIGRATION	GOBP_REGULATION_OF_NEUTROPHIL_MIGRATION	42	0.615757	1.57067	0.0158416	0.0995346	0.999	3290	tags=57%, list=21%, signal=73%
GOBP_CD40_SIGNALING_PATHWAY	GOBP_CD40_SIGNALING_PATHWAY	16	0.660222	1.57048	0.0532787	0.099546	0.999	1507	tags=38%, list=10%, signal=42%
GOBP_GRANULOCYTE_DIFFERENTIATION	GOBP_GRANULOCYTE_DIFFERENTIATION	35	0.553121	1.56969	0.0214133	0.0999625	0.999	3806	tags=49%, list=25%, signal=64%
GOBP_IMMUNOGLOBULIN_PRODUCTION	GOBP_IMMUNOGLOBULIN_PRODUCTION	108	0.552324	1.56962	0.0366599	0.0998813	0.999	2098	tags=32%, list=14%, signal=37%
GOBP_PROGRAMMED_NECROTIC_CELL_DEATH	GOBP_PROGRAMMED_NECROTIC_CELL_DEATH	40	0.463346	1.56754	0.0502092	0.101427	0.999	3593	tags=38%, list=23%, signal=49%
GOBP_REGULATION_OF_B_CELL_ACTIVATION	GOBP_REGULATION_OF_B_CELL_ACTIVATION	115	0.569756	1.56714	0.0584677	0.10162	0.999	3384	tags=50%, list=22%, signal=64%
GOBP_RESPONSE_TO_ETHANOL	GOBP_RESPONSE_TO_ETHANOL	115	0.49339	1.56709	0	0.101529	0.999	4146	tags=44%, list=27%, signal=60%
GOBP_ADRENERGIC_RECEPTOR_SIGNALING_PATHWAY	GOBP_ADRENERGIC_RECEPTOR_SIGNALING_PATHWAY	29	0.610986	1.56692	0.016129	0.101552	0.999	4343	tags=59%, list=28%, signal=82%
GOBP_PINOCYTOSIS	GOBP_PINOCYTOSIS	22	0.493722	1.56687	0.0622318	0.101465	0.999	4245	tags=41%, list=28%, signal=56%
GOBP_REGULATION_OF_PROTEIN_BINDING	GOBP_REGULATION_OF_PROTEIN_BINDING	184	0.400359	1.56659	0.01222	0.101522	0.999	3665	tags=29%, list=24%, signal=38%
GOBP_REGULATION_OF_GLYCOPROTEIN_METABOLIC_PROCESS	GOBP_REGULATION_OF_GLYCOPROTEIN_METABOLIC_PROCESS	41	0.547271	1.5662	0.0240964	0.101711	0.999	1957	tags=29%, list=13%, signal=33%
GOBP_MACROPHAGE_CYTOKINE_PRODUCTION	GOBP_MACROPHAGE_CYTOKINE_PRODUCTION	17	0.652132	1.56582	0.0392927	0.101932	0.999	4595	tags=76%, list=30%, signal=109%
GOBP_REGULATION_OF_TRANSPORTER_ACTIVITY	GOBP_REGULATION_OF_TRANSPORTER_ACTIVITY	243	0.48103	1.56549	0.00194553	0.102018	0.999	3053	tags=35%, list=20%, signal=42%
GOBP_REGULATION_OF_ANTIGEN_RECEPTOR_MEDIATED_SIGNALING_PATHWAY	GOBP_REGULATION_OF_ANTIGEN_RECEPTOR_MEDIATED_SIGNALING_PATHWAY	58	0.679002	1.565	0.0346232	0.102267	0.999	3104	tags=53%, list=20%, signal=67%
GOBP_EXTRINSIC_APOPTOTIC_SIGNALING_PATHWAY	GOBP_EXTRINSIC_APOPTOTIC_SIGNALING_PATHWAY	206	0.427867	1.56464	0.0164271	0.102411	0.999	3288	tags=28%, list=21%, signal=35%
GOBP_NATURAL_KILLER_CELL_ACTIVATION_INVOLVED_IN_IMMUNE_RESPONSE	GOBP_NATURAL_KILLER_CELL_ACTIVATION_INVOLVED_IN_IMMUNE_RESPONSE	27	0.565876	1.56388	0.0200803	0.102877	0.999	1989	tags=22%, list=13%, signal=25%
GOBP_REGULATION_OF_CALCIUM_ION_TRANSMEMBRANE_TRANSPORTER_ACTIVITY	GOBP_REGULATION_OF_CALCIUM_ION_TRANSMEMBRANE_TRANSPORTER_ACTIVITY	73	0.544566	1.56383	0.00961539	0.102788	0.999	3556	tags=45%, list=23%, signal=59%
GOBP_NEGATIVE_REGULATION_OF_TRANSMEMBRANE_TRANSPORT	GOBP_NEGATIVE_REGULATION_OF_TRANSMEMBRANE_TRANSPORT	102	0.492541	1.56364	0.00813008	0.102796	0.999	3627	tags=36%, list=24%, signal=47%
GOBP_T_HELPER_1_TYPE_IMMUNE_RESPONSE	GOBP_T_HELPER_1_TYPE_IMMUNE_RESPONSE	43	0.651365	1.56363	0.0344828	0.102672	0.999	3314	tags=63%, list=22%, signal=80%
GOBP_REGULATION_OF_CELL_JUNCTION_ASSEMBLY	GOBP_REGULATION_OF_CELL_JUNCTION_ASSEMBLY	187	0.488705	1.56349	0.011583	0.102644	0.999	3794	tags=39%, list=25%, signal=51%
GOBP_REGULATION_OF_CIRCADIAN_SLEEP_WAKE_CYCLE	GOBP_REGULATION_OF_CIRCADIAN_SLEEP_WAKE_CYCLE	16	0.685572	1.56341	0.0160321	0.102575	0.999	1462	tags=38%, list=10%, signal=41%
GOBP_INTERLEUKIN_13_PRODUCTION	GOBP_INTERLEUKIN_13_PRODUCTION	18	0.632385	1.56327	0.0227743	0.102553	0.999	3715	tags=56%, list=24%, signal=73%
GOBP_POSITIVE_REGULATION_OF_LIPID_METABOLIC_PROCESS	GOBP_POSITIVE_REGULATION_OF_LIPID_METABOLIC_PROCESS	139	0.493367	1.56317	0.0041841	0.102486	0.999	2954	tags=35%, list=19%, signal=43%
GOBP_REGULATION_OF_TRIGLYCERIDE_METABOLIC_PROCESS	GOBP_REGULATION_OF_TRIGLYCERIDE_METABOLIC_PROCESS	37	0.52947	1.56308	0.0174757	0.102415	0.999	2249	tags=27%, list=15%, signal=32%
GOBP_REACTIVE_OXYGEN_SPECIES_BIOSYNTHETIC_PROCESS	GOBP_REACTIVE_OXYGEN_SPECIES_BIOSYNTHETIC_PROCESS	48	0.537174	1.56289	0.0177866	0.102403	0.999	3114	tags=35%, list=20%, signal=44%
GOBP_NEUTROPHIL_ACTIVATION_INVOLVED_IN_IMMUNE_RESPONSE	GOBP_NEUTROPHIL_ACTIVATION_INVOLVED_IN_IMMUNE_RESPONSE	21	0.673356	1.56278	0.0284553	0.102365	0.999	3399	tags=62%, list=22%, signal=79%
GOBP_NEGATIVE_REGULATION_OF_RECEPTOR_SIGNALING_PATHWAY_VIA_STAT	GOBP_NEGATIVE_REGULATION_OF_RECEPTOR_SIGNALING_PATHWAY_VIA_STAT	23	0.583519	1.56269	0.0389864	0.102299	0.999	1407	tags=30%, list=9%, signal=33%
GOBP_NEUTROPHIL_CHEMOTAXIS	GOBP_NEUTROPHIL_CHEMOTAXIS	86	0.642874	1.56257	0.0261044	0.102255	0.999	2532	tags=52%, list=16%, signal=62%
GOBP_NEGATIVE_REGULATION_OF_ANTIGEN_RECEPTOR_MEDIATED_SIGNALING_PATHWAY	GOBP_NEGATIVE_REGULATION_OF_ANTIGEN_RECEPTOR_MEDIATED_SIGNALING_PATHWAY	32	0.698189	1.56231	0.0283976	0.102301	0.999	2083	tags=50%, list=14%, signal=58%
GOBP_CORONARY_VASCULATURE_MORPHOGENESIS	GOBP_CORONARY_VASCULATURE_MORPHOGENESIS	18	0.667535	1.56223	0.0185567	0.10223	0.999	3440	tags=56%, list=22%, signal=72%
GOBP_REGULATION_OF_MYELOID_LEUKOCYTE_DIFFERENTIATION	GOBP_REGULATION_OF_MYELOID_LEUKOCYTE_DIFFERENTIATION	105	0.507066	1.56179	0.0203666	0.102368	0.999	3806	tags=49%, list=25%, signal=64%
GOBP_NEGATIVE_REGULATION_OF_VIRAL_PROCESS	GOBP_NEGATIVE_REGULATION_OF_VIRAL_PROCESS	82	0.490609	1.56172	0.0427699	0.102283	0.999	2795	tags=32%, list=18%, signal=39%
GOBP_REGULATION_OF_AMYLOID_PRECURSOR_PROTEIN_CATABOLIC_PROCESS	GOBP_REGULATION_OF_AMYLOID_PRECURSOR_PROTEIN_CATABOLIC_PROCESS	38	0.506006	1.56168	0.0295983	0.102168	0.999	3209	tags=37%, list=21%, signal=46%
GOBP_POSITIVE_REGULATION_OF_CARDIAC_MUSCLE_CELL_PROLIFERATION	GOBP_POSITIVE_REGULATION_OF_CARDIAC_MUSCLE_CELL_PROLIFERATION	22	0.667041	1.56146	0.0285714	0.102201	0.999	1659	tags=45%, list=11%, signal=51%
GOBP_ORGANISM_EMERGENCE_FROM_PROTECTIVE_STRUCTURE	GOBP_ORGANISM_EMERGENCE_FROM_PROTECTIVE_STRUCTURE	23	0.532537	1.56137	0.0247423	0.102155	0.999	3071	tags=30%, list=20%, signal=38%
GOBP_REGULATION_OF_CELLULAR_COMPONENT_SIZE	GOBP_REGULATION_OF_CELLULAR_COMPONENT_SIZE	318	0.406127	1.56134	0.00196078	0.102043	0.999	4275	tags=38%, list=28%, signal=51%
GOBP_REGULATION_OF_BLOOD_PRESSURE	GOBP_REGULATION_OF_BLOOD_PRESSURE	170	0.515806	1.56081	0.00197239	0.102347	0.999	3677	tags=42%, list=24%, signal=55%
GOBP_B_CELL_DIFFERENTIATION	GOBP_B_CELL_DIFFERENTIATION	135	0.523229	1.56072	0.0406504	0.102285	0.999	2113	tags=31%, list=14%, signal=36%
GOBP_NEGATIVE_REGULATION_OF_CATION_CHANNEL_ACTIVITY	GOBP_NEGATIVE_REGULATION_OF_CATION_CHANNEL_ACTIVITY	36	0.552655	1.56043	0.0177515	0.102409	0.999	3269	tags=39%, list=21%, signal=49%
GOBP_NEGATIVE_REGULATION_OF_CD4_POSITIVE_ALPHA_BETA_T_CELL_ACTIVATION	GOBP_NEGATIVE_REGULATION_OF_CD4_POSITIVE_ALPHA_BETA_T_CELL_ACTIVATION	24	0.628665	1.56031	0.0504032	0.102403	0.999	3075	tags=46%, list=20%, signal=57%
GOBP_REGULATION_OF_AMYLOID_BETA_CLEARANCE	GOBP_REGULATION_OF_AMYLOID_BETA_CLEARANCE	17	0.632887	1.5602	0.0162272	0.102336	0.999	2986	tags=47%, list=19%, signal=58%
GOBP_LUNG_MORPHOGENESIS	GOBP_LUNG_MORPHOGENESIS	49	0.525179	1.55975	0.0269151	0.102535	0.999	2504	tags=31%, list=16%, signal=36%
GOBP_MODULATION_BY_HOST_OF_VIRAL_PROCESS	GOBP_MODULATION_BY_HOST_OF_VIRAL_PROCESS	29	0.525377	1.55942	0.0205339	0.102662	0.999	3024	tags=31%, list=20%, signal=39%
GOBP_SYNAPTIC_MEMBRANE_ADHESION	GOBP_SYNAPTIC_MEMBRANE_ADHESION	25	0.684602	1.55905	0.0116505	0.102805	0.999	1920	tags=44%, list=13%, signal=50%
GOBP_REGULATION_OF_MUSCLE_SYSTEM_PROCESS	GOBP_REGULATION_OF_MUSCLE_SYSTEM_PROCESS	211	0.478723	1.55852	0.00589391	0.103074	0.999	3731	tags=37%, list=24%, signal=48%
GOBP_REGULATION_OF_MYELOID_CELL_DIFFERENTIATION	GOBP_REGULATION_OF_MYELOID_CELL_DIFFERENTIATION	173	0.443355	1.5585	0.0206612	0.102947	0.999	3806	tags=38%, list=25%, signal=50%
GOBP_REGULATION_OF_MEMBRANE_PROTEIN_ECTODOMAIN_PROTEOLYSIS	GOBP_REGULATION_OF_MEMBRANE_PROTEIN_ECTODOMAIN_PROTEOLYSIS	23	0.608624	1.55821	0.0225873	0.103035	0.999	3757	tags=52%, list=24%, signal=69%
GOBP_POSITIVE_REGULATION_OF_NITRIC_OXIDE_SYNTHASE_BIOSYNTHETIC_PROCESS	GOBP_POSITIVE_REGULATION_OF_NITRIC_OXIDE_SYNTHASE_BIOSYNTHETIC_PROCESS	17	0.714057	1.55803	0.0207469	0.103057	0.999	2991	tags=65%, list=19%, signal=80%
GOBP_REGULATION_OF_METAL_ION_TRANSPORT	GOBP_REGULATION_OF_METAL_ION_TRANSPORT	346	0.477255	1.55803	0	0.10293	0.999	3053	tags=37%, list=20%, signal=45%
GOBP_HEART_TRABECULA_MORPHOGENESIS	GOBP_HEART_TRABECULA_MORPHOGENESIS	30	0.57498	1.558	0.0332031	0.102827	0.999	2096	tags=33%, list=14%, signal=39%
GOBP_REGULATION_OF_PODOSOME_ASSEMBLY	GOBP_REGULATION_OF_PODOSOME_ASSEMBLY	15	0.650997	1.55793	0.0367965	0.102753	0.999	3521	tags=53%, list=23%, signal=69%
GOBP_MYELOID_CELL_HOMEOSTASIS	GOBP_MYELOID_CELL_HOMEOSTASIS	147	0.379855	1.55749	0.0234542	0.102991	0.999	4079	tags=32%, list=27%, signal=43%
GOBP_GLOMERULUS_DEVELOPMENT	GOBP_GLOMERULUS_DEVELOPMENT	64	0.574896	1.55711	0.0224949	0.103114	0.999	3850	tags=52%, list=25%, signal=69%
GOBP_CELL_RECOGNITION	GOBP_CELL_RECOGNITION	143	0.521177	1.55662	0.0060241	0.103354	1	2829	tags=36%, list=18%, signal=43%
GOBP_NEGATIVE_REGULATION_OF_PEPTIDYL_SERINE_PHOSPHORYLATION	GOBP_NEGATIVE_REGULATION_OF_PEPTIDYL_SERINE_PHOSPHORYLATION	24	0.511595	1.55661	0.0462777	0.10323	1	4557	tags=54%, list=30%, signal=77%
GOBP_PODOSOME_ASSEMBLY	GOBP_PODOSOME_ASSEMBLY	20	0.626748	1.5563	0.0310421	0.103357	1	3880	tags=55%, list=25%, signal=73%
GOBP_T_CELL_DIFFERENTIATION_INVOLVED_IN_IMMUNE_RESPONSE	GOBP_T_CELL_DIFFERENTIATION_INVOLVED_IN_IMMUNE_RESPONSE	71	0.605763	1.55558	0.026971	0.103775	1	4276	tags=66%, list=28%, signal=91%
GOBP_MUCOPOLYSACCHARIDE_METABOLIC_PROCESS	GOBP_MUCOPOLYSACCHARIDE_METABOLIC_PROCESS	84	0.508554	1.55536	0.0161943	0.103838	1	3432	tags=42%, list=22%, signal=53%
GOBP_DETECTION_OF_BIOTIC_STIMULUS	GOBP_DETECTION_OF_BIOTIC_STIMULUS	32	0.62776	1.55535	0.035124	0.10371	1	2422	tags=44%, list=16%, signal=52%
GOBP_REGULATION_OF_PLASMA_LIPOPROTEIN_PARTICLE_LEVELS	GOBP_REGULATION_OF_PLASMA_LIPOPROTEIN_PARTICLE_LEVELS	70	0.551324	1.55496	0.0156863	0.103913	1	4501	tags=59%, list=29%, signal=82%
GOBP_MYOBLAST_DIFFERENTIATION	GOBP_MYOBLAST_DIFFERENTIATION	81	0.476237	1.55461	0.0118343	0.104034	1	3044	tags=31%, list=20%, signal=38%
GOBP_SMOOTH_MUSCLE_CONTRACTION	GOBP_SMOOTH_MUSCLE_CONTRACTION	103	0.543302	1.55454	0.0181452	0.103957	1	2548	tags=36%, list=17%, signal=43%
GOBP_POSITIVE_REGULATION_OF_SPROUTING_ANGIOGENESIS	GOBP_POSITIVE_REGULATION_OF_SPROUTING_ANGIOGENESIS	19	0.636515	1.55416	0.0239521	0.104143	1	1649	tags=32%, list=11%, signal=35%
GOBP_NEGATIVE_REGULATION_OF_ATP_DEPENDENT_ACTIVITY	GOBP_NEGATIVE_REGULATION_OF_ATP_DEPENDENT_ACTIVITY	18	0.610366	1.55319	0.0319361	0.104764	1	1711	tags=33%, list=11%, signal=37%
GOBP_POSITIVE_REGULATION_OF_LEUKOCYTE_APOPTOTIC_PROCESS	GOBP_POSITIVE_REGULATION_OF_LEUKOCYTE_APOPTOTIC_PROCESS	23	0.599306	1.55256	0.0345528	0.105121	1	3737	tags=52%, list=24%, signal=69%
GOBP_POSITIVE_REGULATION_OF_TOLL_LIKE_RECEPTOR_SIGNALING_PATHWAY	GOBP_POSITIVE_REGULATION_OF_TOLL_LIKE_RECEPTOR_SIGNALING_PATHWAY	26	0.57167	1.55242	0.030888	0.105108	1	4036	tags=54%, list=26%, signal=73%
GOBP_NEGATIVE_REGULATION_OF_DEFENSE_RESPONSE_TO_VIRUS	GOBP_NEGATIVE_REGULATION_OF_DEFENSE_RESPONSE_TO_VIRUS	22	0.462462	1.55223	0.0677618	0.105126	1	3932	tags=36%, list=26%, signal=49%
GOBP_REGULATION_OF_HEART_GROWTH	GOBP_REGULATION_OF_HEART_GROWTH	57	0.539434	1.55215	0.0217822	0.105057	1	3627	tags=47%, list=24%, signal=62%
GOBP_GANGLIOSIDE_BIOSYNTHETIC_PROCESS	GOBP_GANGLIOSIDE_BIOSYNTHETIC_PROCESS	15	0.662234	1.55204	0.0222672	0.105028	1	3263	tags=47%, list=21%, signal=59%
GOBP_EXTRACELLULAR_MATRIX_ASSEMBLY	GOBP_EXTRACELLULAR_MATRIX_ASSEMBLY	44	0.576859	1.55182	0.0394477	0.105096	1	3602	tags=43%, list=23%, signal=56%
GOBP_TYPE_2_IMMUNE_RESPONSE	GOBP_TYPE_2_IMMUNE_RESPONSE	36	0.628699	1.55167	0.033264	0.105092	1	2247	tags=44%, list=15%, signal=52%
GOBP_REGULATION_OF_SYSTEMIC_ARTERIAL_BLOOD_PRESSURE_MEDIATED_BY_A_CHEMICAL_SIGNAL	GOBP_REGULATION_OF_SYSTEMIC_ARTERIAL_BLOOD_PRESSURE_MEDIATED_BY_A_CHEMICAL_SIGNAL	47	0.638558	1.55142	0.0144628	0.105201	1	1493	tags=32%, list=10%, signal=35%
GOBP_POSITIVE_REGULATION_OF_INTERLEUKIN_4_PRODUCTION	GOBP_POSITIVE_REGULATION_OF_INTERLEUKIN_4_PRODUCTION	23	0.714441	1.5514	0.029703	0.105086	1	2018	tags=57%, list=13%, signal=65%
GOBP_POSITIVE_REGULATION_OF_T_HELPER_CELL_DIFFERENTIATION	GOBP_POSITIVE_REGULATION_OF_T_HELPER_CELL_DIFFERENTIATION	21	0.692142	1.55137	0.026	0.104975	1	3795	tags=71%, list=25%, signal=95%
GOBP_NEGATIVE_REGULATION_OF_MAP_KINASE_ACTIVITY	GOBP_NEGATIVE_REGULATION_OF_MAP_KINASE_ACTIVITY	57	0.513195	1.55105	0.0162272	0.105113	1	4729	tags=61%, list=31%, signal=88%
GOBP_REGULATION_OF_INOSITOL_PHOSPHATE_BIOSYNTHETIC_PROCESS	GOBP_REGULATION_OF_INOSITOL_PHOSPHATE_BIOSYNTHETIC_PROCESS	15	0.727399	1.55097	0.0144928	0.10504	1	2302	tags=60%, list=15%, signal=71%
GOBP_SMOOTH_MUSCLE_CELL_DIFFERENTIATION	GOBP_SMOOTH_MUSCLE_CELL_DIFFERENTIATION	56	0.553147	1.55075	0.0338645	0.105063	1	2477	tags=38%, list=16%, signal=45%
GOBP_REGULATION_OF_LYMPHOCYTE_APOPTOTIC_PROCESS	GOBP_REGULATION_OF_LYMPHOCYTE_APOPTOTIC_PROCESS	53	0.538759	1.55069	0.0331263	0.104984	1	3737	tags=49%, list=24%, signal=65%
GOBP_REGULATION_OF_T_HELPER_1_TYPE_IMMUNE_RESPONSE	GOBP_REGULATION_OF_T_HELPER_1_TYPE_IMMUNE_RESPONSE	29	0.704455	1.55064	0.0239521	0.104883	1	1966	tags=62%, list=13%, signal=71%
GOBP_NEGATIVE_REGULATION_OF_CHEMOTAXIS	GOBP_NEGATIVE_REGULATION_OF_CHEMOTAXIS	53	0.571352	1.5505	0.0201613	0.104871	1	3349	tags=49%, list=22%, signal=63%
GOBP_PULMONARY_VALVE_DEVELOPMENT	GOBP_PULMONARY_VALVE_DEVELOPMENT	21	0.627458	1.55047	0.0262626	0.104764	1	3832	tags=62%, list=25%, signal=82%
GOBP_ACTIN_FILAMENT_DEPOLYMERIZATION	GOBP_ACTIN_FILAMENT_DEPOLYMERIZATION	50	0.513614	1.55026	0.0241935	0.104791	1	4352	tags=56%, list=28%, signal=78%
GOBP_REGULATION_OF_SUPEROXIDE_ANION_GENERATION	GOBP_REGULATION_OF_SUPEROXIDE_ANION_GENERATION	21	0.648273	1.55014	0.018711	0.104764	1	4208	tags=67%, list=27%, signal=92%
GOBP_NEGATIVE_REGULATION_OF_MACROPHAGE_ACTIVATION	GOBP_NEGATIVE_REGULATION_OF_MACROPHAGE_ACTIVATION	15	0.740112	1.54958	0.0145228	0.105117	1	2927	tags=73%, list=19%, signal=91%
GOBP_NEGATIVE_REGULATION_OF_LEUKOCYTE_APOPTOTIC_PROCESS	GOBP_NEGATIVE_REGULATION_OF_LEUKOCYTE_APOPTOTIC_PROCESS	47	0.587455	1.54957	0.0375783	0.10499	1	4073	tags=62%, list=27%, signal=84%
GOBP_NEGATIVE_REGULATION_OF_T_CELL_MEDIATED_IMMUNITY	GOBP_NEGATIVE_REGULATION_OF_T_CELL_MEDIATED_IMMUNITY	26	0.700003	1.54919	0.048583	0.105136	1	2035	tags=54%, list=13%, signal=62%
GOBP_CD8_POSITIVE_ALPHA_BETA_T_CELL_ACTIVATION	GOBP_CD8_POSITIVE_ALPHA_BETA_T_CELL_ACTIVATION	23	0.768067	1.54905	0.0185185	0.105114	1	2849	tags=78%, list=19%, signal=96%
GOBP_NEGATIVE_REGULATION_OF_CD4_POSITIVE_ALPHA_BETA_T_CELL_DIFFERENTIATION	GOBP_NEGATIVE_REGULATION_OF_CD4_POSITIVE_ALPHA_BETA_T_CELL_DIFFERENTIATION	20	0.63501	1.54837	0.045738	0.105477	1	3075	tags=45%, list=20%, signal=56%
GOBP_CARDIOBLAST_DIFFERENTIATION	GOBP_CARDIOBLAST_DIFFERENTIATION	17	0.663375	1.54802	0.02	0.10564	1	2096	tags=41%, list=14%, signal=48%
GOBP_REGULATION_OF_IMMUNOGLOBULIN_PRODUCTION	GOBP_REGULATION_OF_IMMUNOGLOBULIN_PRODUCTION	66	0.571289	1.54763	0.0357853	0.105797	1	2849	tags=39%, list=19%, signal=48%
GOBP_ARTERY_DEVELOPMENT	GOBP_ARTERY_DEVELOPMENT	96	0.523161	1.54762	0.0180361	0.105676	1	3440	tags=45%, list=22%, signal=57%
GOBP_RUFFLE_ASSEMBLY	GOBP_RUFFLE_ASSEMBLY	41	0.467821	1.54726	0.0283976	0.105819	1	1737	tags=24%, list=11%, signal=27%
GOBP_EMBRYONIC_HINDLIMB_MORPHOGENESIS	GOBP_EMBRYONIC_HINDLIMB_MORPHOGENESIS	26	0.635588	1.54709	0.01875	0.105835	1	1605	tags=31%, list=10%, signal=34%
GOBP_CLATHRIN_COAT_ASSEMBLY	GOBP_CLATHRIN_COAT_ASSEMBLY	16	0.561668	1.54693	0.0336634	0.105822	1	3134	tags=38%, list=20%, signal=47%
GOBP_MONOVALENT_INORGANIC_CATION_HOMEOSTASIS	GOBP_MONOVALENT_INORGANIC_CATION_HOMEOSTASIS	140	0.468197	1.54685	0.00988142	0.105772	1	3629	tags=36%, list=24%, signal=46%
GOBP_REGULATION_OF_RIG_I_SIGNALING_PATHWAY	GOBP_REGULATION_OF_RIG_I_SIGNALING_PATHWAY	17	0.552679	1.54678	0.0572597	0.105681	1	3821	tags=41%, list=25%, signal=55%
GOBP_POSITIVE_CHEMOTAXIS	GOBP_POSITIVE_CHEMOTAXIS	49	0.589809	1.54655	0.0238095	0.105795	1	3297	tags=53%, list=21%, signal=67%
GOBP_CELLULAR_COMPONENT_ASSEMBLY_INVOLVED_IN_MORPHOGENESIS	GOBP_CELLULAR_COMPONENT_ASSEMBLY_INVOLVED_IN_MORPHOGENESIS	103	0.499631	1.5464	0.0168224	0.105785	1	3422	tags=36%, list=22%, signal=46%
GOBP_POSITIVE_REGULATION_OF_CALCINEURIN_MEDIATED_SIGNALING	GOBP_POSITIVE_REGULATION_OF_CALCINEURIN_MEDIATED_SIGNALING	15	0.672018	1.54615	0.0292398	0.105865	1	3403	tags=47%, list=22%, signal=60%
GOBP_CELLULAR_RESPONSE_TO_PEPTIDE	GOBP_CELLULAR_RESPONSE_TO_PEPTIDE	324	0.398367	1.54558	0.00201613	0.106251	1	3114	tags=27%, list=20%, signal=34%
GOBP_REGULATION_OF_HYDROGEN_PEROXIDE_METABOLIC_PROCESS	GOBP_REGULATION_OF_HYDROGEN_PEROXIDE_METABOLIC_PROCESS	17	0.591634	1.54529	0.0296443	0.106341	1	3526	tags=35%, list=23%, signal=46%
GOBP_HOMEOSTASIS_OF_NUMBER_OF_CELLS_WITHIN_A_TISSUE	GOBP_HOMEOSTASIS_OF_NUMBER_OF_CELLS_WITHIN_A_TISSUE	28	0.573533	1.54482	0.0276596	0.106612	1	2335	tags=36%, list=15%, signal=42%
GOBP_REGULATION_OF_RAC_PROTEIN_SIGNAL_TRANSDUCTION	GOBP_REGULATION_OF_RAC_PROTEIN_SIGNAL_TRANSDUCTION	21	0.53034	1.54424	0.0309278	0.106948	1	3308	tags=43%, list=22%, signal=55%
GOBP_REGULATION_OF_VIRAL_ENTRY_INTO_HOST_CELL	GOBP_REGULATION_OF_VIRAL_ENTRY_INTO_HOST_CELL	39	0.528998	1.54416	0.0368852	0.106884	1	2730	tags=31%, list=18%, signal=37%
GOBP_POSITIVE_REGULATION_OF_SMOOTH_MUSCLE_CELL_MIGRATION	GOBP_POSITIVE_REGULATION_OF_SMOOTH_MUSCLE_CELL_MIGRATION	31	0.597716	1.54414	0.0209644	0.10677	1	3295	tags=55%, list=21%, signal=70%
GOBP_CELLULAR_RESPONSE_TO_LOW_DENSITY_LIPOPROTEIN_PARTICLE_STIMULUS	GOBP_CELLULAR_RESPONSE_TO_LOW_DENSITY_LIPOPROTEIN_PARTICLE_STIMULUS	17	0.67359	1.54405	0.027833	0.106722	1	3297	tags=59%, list=21%, signal=75%
GOBP_NEGATIVE_REGULATION_OF_T_CELL_APOPTOTIC_PROCESS	GOBP_NEGATIVE_REGULATION_OF_T_CELL_APOPTOTIC_PROCESS	19	0.666642	1.54403	0.0254237	0.106606	1	3519	tags=63%, list=23%, signal=82%
GOBP_ASTROCYTE_ACTIVATION	GOBP_ASTROCYTE_ACTIVATION	18	0.743727	1.54386	0.0106157	0.106587	1	2986	tags=72%, list=19%, signal=90%
GOBP_NEGATIVE_REGULATION_OF_AMYLOID_PRECURSOR_PROTEIN_CATABOLIC_PROCESS	GOBP_NEGATIVE_REGULATION_OF_AMYLOID_PRECURSOR_PROTEIN_CATABOLIC_PROCESS	20	0.58311	1.54354	0.0365112	0.106747	1	2083	tags=35%, list=14%, signal=40%
GOBP_DENDRITIC_CELL_CHEMOTAXIS	GOBP_DENDRITIC_CELL_CHEMOTAXIS	24	0.756357	1.54344	0.036961	0.106711	1	1636	tags=54%, list=11%, signal=61%
GOBP_POSITIVE_REGULATION_OF_LIPID_KINASE_ACTIVITY	GOBP_POSITIVE_REGULATION_OF_LIPID_KINASE_ACTIVITY	37	0.606585	1.54344	0.0329218	0.106584	1	3759	tags=59%, list=24%, signal=79%
GOBP_SUPEROXIDE_ANION_GENERATION	GOBP_SUPEROXIDE_ANION_GENERATION	39	0.578047	1.54234	0.0162933	0.107302	1	3026	tags=49%, list=20%, signal=61%
GOBP_VASCULAR_ENDOTHELIAL_GROWTH_FACTOR_SIGNALING_PATHWAY	GOBP_VASCULAR_ENDOTHELIAL_GROWTH_FACTOR_SIGNALING_PATHWAY	39	0.570641	1.54231	0.0182556	0.107202	1	3295	tags=49%, list=21%, signal=62%
GOBP_REGULATION_OF_BICELLULAR_TIGHT_JUNCTION_ASSEMBLY	GOBP_REGULATION_OF_BICELLULAR_TIGHT_JUNCTION_ASSEMBLY	20	0.551368	1.54202	0.034413	0.107308	1	3794	tags=45%, list=25%, signal=60%
GOBP_CELLULAR_RESPONSE_TO_VIRUS	GOBP_CELLULAR_RESPONSE_TO_VIRUS	66	0.493476	1.54188	0.0454545	0.107309	1	3900	tags=36%, list=25%, signal=49%
GOBP_OUTFLOW_TRACT_MORPHOGENESIS	GOBP_OUTFLOW_TRACT_MORPHOGENESIS	78	0.53102	1.54128	0.0283401	0.107727	1	3850	tags=53%, list=25%, signal=70%
GOBP_RESPONSE_TO_ATP	GOBP_RESPONSE_TO_ATP	28	0.590387	1.54092	0.0185185	0.107893	1	2672	tags=43%, list=17%, signal=52%
GOBP_T_HELPER_1_CELL_DIFFERENTIATION	GOBP_T_HELPER_1_CELL_DIFFERENTIATION	20	0.673171	1.54074	0.0504032	0.107906	1	4207	tags=70%, list=27%, signal=96%
GOBP_POSITIVE_REGULATION_OF_MONOCYTE_CHEMOTAXIS	GOBP_POSITIVE_REGULATION_OF_MONOCYTE_CHEMOTAXIS	19	0.691482	1.54066	0.0392562	0.107864	1	2902	tags=63%, list=19%, signal=78%
GOBP_REGULATION_OF_SMOOTH_MUSCLE_CELL_DIFFERENTIATION	GOBP_REGULATION_OF_SMOOTH_MUSCLE_CELL_DIFFERENTIATION	28	0.566253	1.54001	0.0324544	0.10825	1	4390	tags=54%, list=29%, signal=75%
GOBP_PIGMENT_GRANULE_ORGANIZATION	GOBP_PIGMENT_GRANULE_ORGANIZATION	24	0.503636	1.53995	0.0357895	0.108161	1	2762	tags=29%, list=18%, signal=36%
GOBP_POSITIVE_REGULATION_OF_NOTCH_SIGNALING_PATHWAY	GOBP_POSITIVE_REGULATION_OF_NOTCH_SIGNALING_PATHWAY	41	0.491465	1.5399	0.026971	0.108075	1	2096	tags=22%, list=14%, signal=25%
GOBP_REGULATION_OF_RESPONSE_TO_REACTIVE_OXYGEN_SPECIES	GOBP_REGULATION_OF_RESPONSE_TO_REACTIVE_OXYGEN_SPECIES	28	0.561545	1.53986	0.028	0.107987	1	1934	tags=36%, list=13%, signal=41%
GOBP_PROTEIN_ADP_RIBOSYLATION	GOBP_PROTEIN_ADP_RIBOSYLATION	34	0.46591	1.53969	0.0444444	0.107987	1	2540	tags=21%, list=17%, signal=25%
GOBP_RESPONSE_TO_ALCOHOL	GOBP_RESPONSE_TO_ALCOHOL	217	0.460783	1.53966	0.00796813	0.107883	1	4146	tags=40%, list=27%, signal=54%
GOBP_REGULATION_OF_ISOTYPE_SWITCHING	GOBP_REGULATION_OF_ISOTYPE_SWITCHING	30	0.579707	1.5395	0.0491803	0.107883	1	2538	tags=37%, list=17%, signal=44%
GOBP_REGULATION_OF_CATION_CHANNEL_ACTIVITY	GOBP_REGULATION_OF_CATION_CHANNEL_ACTIVITY	145	0.485759	1.53935	0.00193798	0.107874	1	3024	tags=37%, list=20%, signal=46%
GOBP_REGULATION_OF_CELL_MORPHOGENESIS	GOBP_REGULATION_OF_CELL_MORPHOGENESIS	283	0.389753	1.53883	0.0124224	0.10814	1	3956	tags=35%, list=26%, signal=46%
GOBP_ERYTHROCYTE_HOMEOSTASIS	GOBP_ERYTHROCYTE_HOMEOSTASIS	121	0.373192	1.53879	0.0190678	0.108047	1	4079	tags=30%, list=27%, signal=40%
GOBP_NEGATIVE_REGULATION_OF_T_HELPER_CELL_DIFFERENTIATION	GOBP_NEGATIVE_REGULATION_OF_T_HELPER_CELL_DIFFERENTIATION	17	0.636339	1.53829	0.0412371	0.108339	1	3075	tags=47%, list=20%, signal=59%
GOBP_CELL_COMMUNICATION_BY_ELECTRICAL_COUPLING_INVOLVED_IN_CARDIAC_CONDUCTION	GOBP_CELL_COMMUNICATION_BY_ELECTRICAL_COUPLING_INVOLVED_IN_CARDIAC_CONDUCTION	25	0.634228	1.53782	0.0389344	0.108634	1	1906	tags=40%, list=12%, signal=46%
GOBP_LIPOPROTEIN_LOCALIZATION	GOBP_LIPOPROTEIN_LOCALIZATION	16	0.6632	1.53763	0.0314961	0.108656	1	698	tags=25%, list=5%, signal=26%
GOBP_PIGMENT_CELL_DIFFERENTIATION	GOBP_PIGMENT_CELL_DIFFERENTIATION	32	0.565187	1.53692	0.015625	0.109111	1	2762	tags=41%, list=18%, signal=49%
GOBP_REGULATION_OF_DEFENSE_RESPONSE_TO_VIRUS_BY_HOST	GOBP_REGULATION_OF_DEFENSE_RESPONSE_TO_VIRUS_BY_HOST	36	0.603988	1.53683	0.0709939	0.109049	1	4606	tags=58%, list=30%, signal=83%
GOBP_REGULATION_OF_MUSCLE_ADAPTATION	GOBP_REGULATION_OF_MUSCLE_ADAPTATION	73	0.476703	1.53682	0.0216963	0.108929	1	3627	tags=33%, list=24%, signal=43%
GOBP_REGULATION_OF_CELLULAR_PROTEIN_CATABOLIC_PROCESS	GOBP_REGULATION_OF_CELLULAR_PROTEIN_CATABOLIC_PROCESS	228	0.279568	1.53671	0.0257426	0.108892	1	4985	tags=31%, list=32%, signal=45%
GOBP_RESPONSE_TO_PEPTIDE	GOBP_RESPONSE_TO_PEPTIDE	442	0.397613	1.53642	0.0040568	0.108996	1	3116	tags=28%, list=20%, signal=34%
GOBP_HYALURONAN_METABOLIC_PROCESS	GOBP_HYALURONAN_METABOLIC_PROCESS	27	0.627522	1.53633	0.0141988	0.108968	1	2925	tags=48%, list=19%, signal=59%
GOBP_VESICLE_MEDIATED_TRANSPORT_TO_THE_PLASMA_MEMBRANE	GOBP_VESICLE_MEDIATED_TRANSPORT_TO_THE_PLASMA_MEMBRANE	122	0.317216	1.53601	0.043659	0.109137	1	5704	tags=42%, list=37%, signal=66%
GOBP_REGULATION_OF_CYTOSKELETON_ORGANIZATION	GOBP_REGULATION_OF_CYTOSKELETON_ORGANIZATION	476	0.367977	1.53587	0.00809717	0.109129	1	3925	tags=34%, list=26%, signal=44%
GOBP_FAT_CELL_DIFFERENTIATION	GOBP_FAT_CELL_DIFFERENTIATION	208	0.43787	1.53551	0.00617284	0.109336	1	4753	tags=46%, list=31%, signal=65%
GOBP_PHOSPHOLIPID_METABOLIC_PROCESS	GOBP_PHOSPHOLIPID_METABOLIC_PROCESS	339	0.359944	1.53526	0.0153257	0.109422	1	3540	tags=27%, list=23%, signal=34%
GOBP_TISSUE_REMODELING	GOBP_TISSUE_REMODELING	155	0.489746	1.53463	0.0139721	0.109801	1	3850	tags=45%, list=25%, signal=60%
GOBP_NEGATIVE_REGULATION_OF_MYOBLAST_DIFFERENTIATION	GOBP_NEGATIVE_REGULATION_OF_MYOBLAST_DIFFERENTIATION	24	0.622296	1.53424	0.0207039	0.109982	1	2895	tags=54%, list=19%, signal=67%
GOBP_SIGNAL_TRANSDUCTION_IN_ABSENCE_OF_LIGAND	GOBP_SIGNAL_TRANSDUCTION_IN_ABSENCE_OF_LIGAND	62	0.496037	1.53351	0.0224033	0.110449	1	1265	tags=18%, list=8%, signal=19%
GOBP_REGULATION_OF_CARBOHYDRATE_METABOLIC_PROCESS	GOBP_REGULATION_OF_CARBOHYDRATE_METABOLIC_PROCESS	162	0.398514	1.53339	0.006	0.110422	1	3177	tags=25%, list=21%, signal=32%
GOBP_POSITIVE_REGULATION_OF_PROTEIN_TYROSINE_KINASE_ACTIVITY	GOBP_POSITIVE_REGULATION_OF_PROTEIN_TYROSINE_KINASE_ACTIVITY	46	0.552148	1.53316	0.0242915	0.110483	1	3715	tags=54%, list=24%, signal=71%
GOBP_CELL_PROLIFERATION_INVOLVED_IN_KIDNEY_DEVELOPMENT	GOBP_CELL_PROLIFERATION_INVOLVED_IN_KIDNEY_DEVELOPMENT	21	0.649826	1.5328	0.0144628	0.110615	1	3385	tags=62%, list=22%, signal=79%
GOBP_REGULATION_OF_MACROPHAGE_ACTIVATION	GOBP_REGULATION_OF_MACROPHAGE_ACTIVATION	52	0.611544	1.53235	0.0210526	0.110858	1	3091	tags=56%, list=20%, signal=70%
GOBP_RIG_I_SIGNALING_PATHWAY	GOBP_RIG_I_SIGNALING_PATHWAY	25	0.472492	1.53212	0.105368	0.110919	1	3900	tags=36%, list=25%, signal=48%
GOBP_MAINTENANCE_OF_BLOOD_BRAIN_BARRIER	GOBP_MAINTENANCE_OF_BLOOD_BRAIN_BARRIER	35	0.566226	1.53198	0.0333333	0.110917	1	2944	tags=43%, list=19%, signal=53%
GOBP_REGULATION_OF_PROGRAMMED_NECROTIC_CELL_DEATH	GOBP_REGULATION_OF_PROGRAMMED_NECROTIC_CELL_DEATH	22	0.475086	1.53194	0.0686869	0.110831	1	4492	tags=50%, list=29%, signal=71%
GOBP_POST_EMBRYONIC_ANIMAL_ORGAN_DEVELOPMENT	GOBP_POST_EMBRYONIC_ANIMAL_ORGAN_DEVELOPMENT	16	0.612252	1.53177	0.0339703	0.110883	1	3036	tags=44%, list=20%, signal=54%
GOBP_DENDRITIC_CELL_CYTOKINE_PRODUCTION	GOBP_DENDRITIC_CELL_CYTOKINE_PRODUCTION	16	0.620402	1.53155	0.0538302	0.110944	1	2795	tags=50%, list=18%, signal=61%
GOBP_INFLAMMASOME_COMPLEX_ASSEMBLY	GOBP_INFLAMMASOME_COMPLEX_ASSEMBLY	20	0.650821	1.5305	0.0488798	0.111706	1	3098	tags=65%, list=20%, signal=81%
GOBP_REGULATION_OF_MUSCLE_CONTRACTION	GOBP_REGULATION_OF_MUSCLE_CONTRACTION	150	0.494132	1.53047	0.0137255	0.111604	1	2851	tags=33%, list=19%, signal=41%
GOBP_NEGATIVE_REGULATION_OF_INTERLEUKIN_10_PRODUCTION	GOBP_NEGATIVE_REGULATION_OF_INTERLEUKIN_10_PRODUCTION	18	0.716964	1.53028	0.0286885	0.111608	1	1996	tags=56%, list=13%, signal=64%
GOBP_POSITIVE_REGULATION_OF_BONE_MINERALIZATION	GOBP_POSITIVE_REGULATION_OF_BONE_MINERALIZATION	38	0.587657	1.52964	0.0121212	0.112052	1	3596	tags=53%, list=23%, signal=69%
GOBP_ENDOSOMAL_TRANSPORT	GOBP_ENDOSOMAL_TRANSPORT	193	0.279653	1.52936	0.0452675	0.112157	1	6006	tags=40%, list=39%, signal=66%
GOBP_REGULATION_OF_ACUTE_INFLAMMATORY_RESPONSE	GOBP_REGULATION_OF_ACUTE_INFLAMMATORY_RESPONSE	43	0.623556	1.52877	0.01222	0.112496	1	2394	tags=49%, list=16%, signal=58%
GOBP_REGULATION_OF_VIRAL_INDUCED_CYTOPLASMIC_PATTERN_RECOGNITION_RECEPTOR_SIGNALING_PATHWAY	GOBP_REGULATION_OF_VIRAL_INDUCED_CYTOPLASMIC_PATTERN_RECOGNITION_RECEPTOR_SIGNALING_PATHWAY	18	0.535847	1.52875	0.0613497	0.112384	1	2263	tags=28%, list=15%, signal=33%
GOBP_REGULATION_OF_MICROGLIAL_CELL_ACTIVATION	GOBP_REGULATION_OF_MICROGLIAL_CELL_ACTIVATION	15	0.73709	1.52865	0.0276008	0.112338	1	3282	tags=80%, list=21%, signal=102%
GOBP_MULTICELLULAR_ORGANISMAL_MOVEMENT	GOBP_MULTICELLULAR_ORGANISMAL_MOVEMENT	52	0.555156	1.52844	0.0132325	0.112369	1	3286	tags=40%, list=21%, signal=51%
GOBP_HUMORAL_IMMUNE_RESPONSE	GOBP_HUMORAL_IMMUNE_RESPONSE	211	0.558255	1.52827	0.00204082	0.112358	1	3314	tags=47%, list=22%, signal=59%
GOBP_NEGATIVE_REGULATION_OF_VIRAL_ENTRY_INTO_HOST_CELL	GOBP_NEGATIVE_REGULATION_OF_VIRAL_ENTRY_INTO_HOST_CELL	22	0.598126	1.52818	0.032	0.112317	1	759	tags=23%, list=5%, signal=24%
GOBP_STRIATED_MUSCLE_CONTRACTION	GOBP_STRIATED_MUSCLE_CONTRACTION	159	0.503091	1.52806	0.00595238	0.112287	1	2452	tags=31%, list=16%, signal=37%
GOBP_PROTEIN_LOCALIZATION_TO_PLASMA_MEMBRANE	GOBP_PROTEIN_LOCALIZATION_TO_PLASMA_MEMBRANE	265	0.360844	1.5279	0.027833	0.112278	1	3195	tags=26%, list=21%, signal=32%
GOBP_RESPONSE_TO_FUNGUS	GOBP_RESPONSE_TO_FUNGUS	56	0.596456	1.52785	0.0279441	0.112206	1	4024	tags=55%, list=26%, signal=75%
GOBP_REGULATION_OF_BODY_FLUID_LEVELS	GOBP_REGULATION_OF_BODY_FLUID_LEVELS	360	0.457438	1.52736	0.00596422	0.11248	1	3122	tags=33%, list=20%, signal=41%
GOBP_HETEROPHILIC_CELL_CELL_ADHESION_VIA_PLASMA_MEMBRANE_CELL_ADHESION_MOLECULES	GOBP_HETEROPHILIC_CELL_CELL_ADHESION_VIA_PLASMA_MEMBRANE_CELL_ADHESION_MOLECULES	35	0.624643	1.52719	0.0133843	0.112513	1	2687	tags=46%, list=17%, signal=55%
GOBP_CIRCADIAN_SLEEP_WAKE_CYCLE	GOBP_CIRCADIAN_SLEEP_WAKE_CYCLE	19	0.629608	1.52686	0.0280561	0.112687	1	1462	tags=32%, list=10%, signal=35%
GOBP_NEGATIVE_REGULATION_OF_ERK1_AND_ERK2_CASCADE	GOBP_NEGATIVE_REGULATION_OF_ERK1_AND_ERK2_CASCADE	66	0.456941	1.52684	0.018595	0.112591	1	3323	tags=36%, list=22%, signal=46%
GOBP_CARDIAC_EPITHELIAL_TO_MESENCHYMAL_TRANSITION	GOBP_CARDIAC_EPITHELIAL_TO_MESENCHYMAL_TRANSITION	36	0.592603	1.52681	0.0459082	0.112482	1	4729	tags=67%, list=31%, signal=96%
GOBP_REGULATION_OF_NMDA_RECEPTOR_ACTIVITY	GOBP_REGULATION_OF_NMDA_RECEPTOR_ACTIVITY	22	0.642881	1.52556	0.0218688	0.113339	1	1563	tags=32%, list=10%, signal=35%
GOBP_NEGATIVE_REGULATION_OF_LYASE_ACTIVITY	GOBP_NEGATIVE_REGULATION_OF_LYASE_ACTIVITY	25	0.575795	1.52545	0.0282258	0.113301	1	3612	tags=44%, list=24%, signal=57%
GOBP_REGULATION_OF_MUSCLE_HYPERTROPHY	GOBP_REGULATION_OF_MUSCLE_HYPERTROPHY	53	0.50793	1.52541	0.0278884	0.113208	1	3627	tags=40%, list=24%, signal=52%
GOBP_AORTIC_VALVE_MORPHOGENESIS	GOBP_AORTIC_VALVE_MORPHOGENESIS	32	0.619065	1.52528	0.039916	0.113186	1	3832	tags=53%, list=25%, signal=71%
GOBP_NEGATIVE_REGULATION_OF_VIRAL_LIFE_CYCLE	GOBP_NEGATIVE_REGULATION_OF_VIRAL_LIFE_CYCLE	25	0.573125	1.52509	0.0324544	0.113208	1	3129	tags=36%, list=20%, signal=45%
GOBP_MHC_CLASS_II_BIOSYNTHETIC_PROCESS	GOBP_MHC_CLASS_II_BIOSYNTHETIC_PROCESS	16	0.693664	1.52494	0.045082	0.113168	1	2517	tags=50%, list=16%, signal=60%
GOBP_REGULATION_OF_ANATOMICAL_STRUCTURE_SIZE	GOBP_REGULATION_OF_ANATOMICAL_STRUCTURE_SIZE	444	0.430192	1.52449	0.00199203	0.113409	1	3418	tags=32%, list=22%, signal=40%
GOBP_TOLL_LIKE_RECEPTOR_2_SIGNALING_PATHWAY	GOBP_TOLL_LIKE_RECEPTOR_2_SIGNALING_PATHWAY	16	0.648651	1.52428	0.0566038	0.113433	1	3845	tags=63%, list=25%, signal=83%
GOBP_CHOLESTEROL_EFFLUX	GOBP_CHOLESTEROL_EFFLUX	52	0.520741	1.52412	0.0169492	0.113436	1	4501	tags=54%, list=29%, signal=76%
GOBP_NEGATIVE_REGULATION_OF_INTERFERON_GAMMA_PRODUCTION	GOBP_NEGATIVE_REGULATION_OF_INTERFERON_GAMMA_PRODUCTION	34	0.670502	1.52409	0.0307377	0.113327	1	2192	tags=59%, list=14%, signal=68%
GOBP_NEGATIVE_REGULATION_OF_SUPRAMOLECULAR_FIBER_ORGANIZATION	GOBP_NEGATIVE_REGULATION_OF_SUPRAMOLECULAR_FIBER_ORGANIZATION	145	0.425839	1.52334	0.0224033	0.113825	1	3665	tags=39%, list=24%, signal=50%
GOBP_RESPONSE_TO_AMINO_ACID_STARVATION	GOBP_RESPONSE_TO_AMINO_ACID_STARVATION	45	0.398062	1.52314	0.0755102	0.113872	1	4669	tags=33%, list=30%, signal=48%
GOBP_NEGATIVE_REGULATION_OF_EPITHELIAL_CELL_MIGRATION	GOBP_NEGATIVE_REGULATION_OF_EPITHELIAL_CELL_MIGRATION	65	0.488272	1.52306	0.0277778	0.11381	1	3174	tags=40%, list=21%, signal=50%
GOBP_POSITIVE_REGULATION_OF_CELLULAR_RESPONSE_TO_TRANSFORMING_GROWTH_FACTOR_BETA_STIMULUS	GOBP_POSITIVE_REGULATION_OF_CELLULAR_RESPONSE_TO_TRANSFORMING_GROWTH_FACTOR_BETA_STIMULUS	31	0.527672	1.52295	0.0500963	0.11376	1	1970	tags=23%, list=13%, signal=26%
GOBP_MATURE_B_CELL_DIFFERENTIATION	GOBP_MATURE_B_CELL_DIFFERENTIATION	34	0.644886	1.52285	0.0430328	0.113698	1	2098	tags=50%, list=14%, signal=58%
GOBP_TRACHEA_DEVELOPMENT	GOBP_TRACHEA_DEVELOPMENT	18	0.634817	1.5224	0.044898	0.113995	1	2760	tags=39%, list=18%, signal=47%
GOBP_POSITIVE_REGULATION_OF_ANTIGEN_RECEPTOR_MEDIATED_SIGNALING_PATHWAY	GOBP_POSITIVE_REGULATION_OF_ANTIGEN_RECEPTOR_MEDIATED_SIGNALING_PATHWAY	21	0.727643	1.52211	0.037037	0.1141	1	1418	tags=38%, list=9%, signal=42%
GOBP_NEUTROPHIL_MIGRATION	GOBP_NEUTROPHIL_MIGRATION	109	0.59908	1.52181	0.0304878	0.114225	1	3581	tags=57%, list=23%, signal=74%
GOBP_CELLULAR_MONOVALENT_INORGANIC_CATION_HOMEOSTASIS	GOBP_CELLULAR_MONOVALENT_INORGANIC_CATION_HOMEOSTASIS	97	0.455185	1.52159	0.015444	0.114262	1	3629	tags=35%, list=24%, signal=46%
GOBP_EPITHELIAL_TUBE_BRANCHING_INVOLVED_IN_LUNG_MORPHOGENESIS	GOBP_EPITHELIAL_TUBE_BRANCHING_INVOLVED_IN_LUNG_MORPHOGENESIS	29	0.599515	1.52153	0.0232558	0.114192	1	2504	tags=45%, list=16%, signal=53%
GOBP_POSITIVE_REGULATION_OF_RECEPTOR_MEDIATED_ENDOCYTOSIS	GOBP_POSITIVE_REGULATION_OF_RECEPTOR_MEDIATED_ENDOCYTOSIS	51	0.502373	1.52151	0.0327869	0.114085	1	4396	tags=51%, list=29%, signal=71%
GOBP_REGULATION_OF_CELLULAR_PH	GOBP_REGULATION_OF_CELLULAR_PH	73	0.437262	1.5215	0.0216535	0.113977	1	3629	tags=34%, list=24%, signal=45%
GOBP_LYTIC_VACUOLE_ORGANIZATION	GOBP_LYTIC_VACUOLE_ORGANIZATION	65	0.360122	1.52139	0.0470588	0.113933	1	5289	tags=42%, list=34%, signal=63%
GOBP_REGULATION_OF_NEUTROPHIL_CHEMOTAXIS	GOBP_REGULATION_OF_NEUTROPHIL_CHEMOTAXIS	29	0.630879	1.52103	0.0276134	0.114113	1	2516	tags=52%, list=16%, signal=62%
GOBP_RESPONSE_TO_AXON_INJURY	GOBP_RESPONSE_TO_AXON_INJURY	75	0.460283	1.52069	0.0219124	0.114275	1	3737	tags=41%, list=24%, signal=54%
GOBP_ANTIGEN_PROCESSING_AND_PRESENTATION_OF_ENDOGENOUS_PEPTIDE_ANTIGEN	GOBP_ANTIGEN_PROCESSING_AND_PRESENTATION_OF_ENDOGENOUS_PEPTIDE_ANTIGEN	16	0.625521	1.51978	0.057377	0.114855	1	4349	tags=81%, list=28%, signal=113%
GOBP_REGULATION_OF_MULTICELLULAR_ORGANISM_GROWTH	GOBP_REGULATION_OF_MULTICELLULAR_ORGANISM_GROWTH	61	0.473163	1.51957	0.0173913	0.114897	1	2902	tags=30%, list=19%, signal=36%
GOBP_POSITIVE_REGULATION_OF_TYROSINE_PHOSPHORYLATION_OF_STAT_PROTEIN	GOBP_POSITIVE_REGULATION_OF_TYROSINE_PHOSPHORYLATION_OF_STAT_PROTEIN	60	0.561446	1.51927	0.00994036	0.115003	1	2098	tags=35%, list=14%, signal=40%
GOBP_RESPIRATORY_GASEOUS_EXCHANGE_BY_RESPIRATORY_SYSTEM	GOBP_RESPIRATORY_GASEOUS_EXCHANGE_BY_RESPIRATORY_SYSTEM	63	0.52657	1.51917	0.0144628	0.114964	1	2696	tags=35%, list=18%, signal=42%
GOBP_REGULATION_OF_B_CELL_PROLIFERATION	GOBP_REGULATION_OF_B_CELL_PROLIFERATION	62	0.609709	1.51887	0.0657084	0.115135	1	3747	tags=58%, list=24%, signal=76%
GOBP_ATRIOVENTRICULAR_VALVE_DEVELOPMENT	GOBP_ATRIOVENTRICULAR_VALVE_DEVELOPMENT	26	0.582837	1.51877	0.0393375	0.115093	1	4153	tags=58%, list=27%, signal=79%
GOBP_LYMPH_VESSEL_MORPHOGENESIS	GOBP_LYMPH_VESSEL_MORPHOGENESIS	22	0.653553	1.51876	0.0442656	0.114976	1	3850	tags=59%, list=25%, signal=79%
GOBP_CELLULAR_RESPONSE_TO_EXTERNAL_STIMULUS	GOBP_CELLULAR_RESPONSE_TO_EXTERNAL_STIMULUS	281	0.376579	1.51855	0.012024	0.115014	1	2864	tags=23%, list=19%, signal=28%
GOBP_REGULATION_OF_STEROL_TRANSPORT	GOBP_REGULATION_OF_STEROL_TRANSPORT	61	0.496556	1.51855	0.015748	0.114893	1	4501	tags=49%, list=29%, signal=69%
GOBP_CALCIUM_MEDIATED_SIGNALING_USING_INTRACELLULAR_CALCIUM_SOURCE	GOBP_CALCIUM_MEDIATED_SIGNALING_USING_INTRACELLULAR_CALCIUM_SOURCE	19	0.636763	1.51839	0.0160643	0.114911	1	3702	tags=63%, list=24%, signal=83%
GOBP_POSITIVE_REGULATION_OF_AMYLOID_BETA_FORMATION	GOBP_POSITIVE_REGULATION_OF_AMYLOID_BETA_FORMATION	15	0.576509	1.51755	0.0610526	0.1155	1	3002	tags=40%, list=20%, signal=50%
GOBP_BASEMENT_MEMBRANE_ASSEMBLY	GOBP_BASEMENT_MEMBRANE_ASSEMBLY	15	0.61711	1.51754	0.0495049	0.115377	1	3322	tags=40%, list=22%, signal=51%
GOBP_RELAXATION_OF_CARDIAC_MUSCLE	GOBP_RELAXATION_OF_CARDIAC_MUSCLE	17	0.667877	1.51743	0.0326531	0.115349	1	3551	tags=65%, list=23%, signal=84%
GOBP_ESTABLISHMENT_OF_CELL_POLARITY	GOBP_ESTABLISHMENT_OF_CELL_POLARITY	135	0.376012	1.51715	0.00198807	0.115443	1	4032	tags=32%, list=26%, signal=43%
GOBP_GLYCEROPHOSPHOLIPID_METABOLIC_PROCESS	GOBP_GLYCEROPHOSPHOLIPID_METABOLIC_PROCESS	277	0.353716	1.517	0.0153551	0.115432	1	4372	tags=34%, list=28%, signal=47%
GOBP_ACTIVATION_OF_CYSTEINE_TYPE_ENDOPEPTIDASE_ACTIVITY	GOBP_ACTIVATION_OF_CYSTEINE_TYPE_ENDOPEPTIDASE_ACTIVITY	19	0.511747	1.51699	0.0510638	0.115318	1	3474	tags=37%, list=23%, signal=48%
GOBP_FEAR_RESPONSE	GOBP_FEAR_RESPONSE	35	0.580329	1.51677	0.0116732	0.115401	1	1875	tags=31%, list=12%, signal=36%
GOBP_REGULATION_OF_CARDIOCYTE_DIFFERENTIATION	GOBP_REGULATION_OF_CARDIOCYTE_DIFFERENTIATION	25	0.609941	1.51666	0.0284553	0.11537	1	3440	tags=56%, list=22%, signal=72%
GOBP_POSITIVE_REGULATION_OF_ENDOTHELIAL_CELL_APOPTOTIC_PROCESS	GOBP_POSITIVE_REGULATION_OF_ENDOTHELIAL_CELL_APOPTOTIC_PROCESS	15	0.702345	1.51656	0.031746	0.115335	1	3358	tags=67%, list=22%, signal=85%
GOBP_REGULATION_OF_MYELOID_CELL_APOPTOTIC_PROCESS	GOBP_REGULATION_OF_MYELOID_CELL_APOPTOTIC_PROCESS	25	0.52789	1.51644	0.0371901	0.115306	1	2373	tags=36%, list=15%, signal=43%
GOBP_RESPIRATORY_BURST	GOBP_RESPIRATORY_BURST	29	0.619697	1.51584	0.0635246	0.115686	1	2907	tags=48%, list=19%, signal=59%
GOBP_REGULATION_OF_CARDIAC_MUSCLE_CONTRACTION_BY_REGULATION_OF_THE_RELEASE_OF_SEQUESTERED_CALCIUM_ION	GOBP_REGULATION_OF_CARDIAC_MUSCLE_CONTRACTION_BY_REGULATION_OF_THE_RELEASE_OF_SEQUESTERED_CALCIUM_ION	19	0.708547	1.51579	0.019802	0.115596	1	1711	tags=47%, list=11%, signal=53%
GOBP_HEART_PROCESS	GOBP_HEART_PROCESS	232	0.487777	1.51525	0.0122699	0.115934	1	3717	tags=41%, list=24%, signal=53%
GOBP_AXON_EXTENSION	GOBP_AXON_EXTENSION	115	0.447056	1.51475	0.0285714	0.11624	1	3631	tags=37%, list=24%, signal=47%
GOBP_MAMMARY_GLAND_MORPHOGENESIS	GOBP_MAMMARY_GLAND_MORPHOGENESIS	41	0.552773	1.5146	0.0311284	0.116234	1	4121	tags=56%, list=27%, signal=76%
GOBP_3_UTR_MEDIATED_MRNA_DESTABILIZATION	GOBP_3_UTR_MEDIATED_MRNA_DESTABILIZATION	17	0.533665	1.51425	0.0521235	0.116376	1	3685	tags=35%, list=24%, signal=46%
GOBP_NEGATIVE_REGULATION_OF_DEPHOSPHORYLATION	GOBP_NEGATIVE_REGULATION_OF_DEPHOSPHORYLATION	41	0.451631	1.5142	0.0368852	0.116293	1	4675	tags=39%, list=30%, signal=56%
GOBP_REGULATION_OF_ANTIGEN_PROCESSING_AND_PRESENTATION	GOBP_REGULATION_OF_ANTIGEN_PROCESSING_AND_PRESENTATION	20	0.743141	1.51408	0.0409836	0.116267	1	2486	tags=70%, list=16%, signal=83%
GOBP_REGULATION_OF_MONOCYTE_DIFFERENTIATION	GOBP_REGULATION_OF_MONOCYTE_DIFFERENTIATION	17	0.558615	1.51396	0.0637066	0.116241	1	5620	tags=76%, list=37%, signal=120%
GOBP_POSITIVE_REGULATION_OF_MYELOID_LEUKOCYTE_CYTOKINE_PRODUCTION_INVOLVED_IN_IMMUNE_RESPONSE	GOBP_POSITIVE_REGULATION_OF_MYELOID_LEUKOCYTE_CYTOKINE_PRODUCTION_INVOLVED_IN_IMMUNE_RESPONSE	23	0.552751	1.51357	0.0509165	0.116464	1	3875	tags=48%, list=25%, signal=64%
GOBP_NEGATIVE_REGULATION_OF_T_CELL_RECEPTOR_SIGNALING_PATHWAY	GOBP_NEGATIVE_REGULATION_OF_T_CELL_RECEPTOR_SIGNALING_PATHWAY	25	0.669274	1.51346	0.039501	0.116404	1	2508	tags=48%, list=16%, signal=57%
GOBP_NEGATIVE_REGULATION_OF_CELL_MIGRATION_INVOLVED_IN_SPROUTING_ANGIOGENESIS	GOBP_NEGATIVE_REGULATION_OF_CELL_MIGRATION_INVOLVED_IN_SPROUTING_ANGIOGENESIS	15	0.590406	1.51341	0.0705394	0.116353	1	2732	tags=33%, list=18%, signal=41%
GOBP_REGULATION_OF_ORGAN_GROWTH	GOBP_REGULATION_OF_ORGAN_GROWTH	82	0.495403	1.51338	0.0224033	0.116262	1	3953	tags=45%, list=26%, signal=60%
GOBP_NEGATIVE_REGULATION_OF_MIRNA_TRANSCRIPTION	GOBP_NEGATIVE_REGULATION_OF_MIRNA_TRANSCRIPTION	17	0.592144	1.51322	0.0588235	0.116285	1	3486	tags=41%, list=23%, signal=53%
GOBP_NEGATIVE_REGULATION_OF_PROTEIN_LOCALIZATION_TO_NUCLEUS	GOBP_NEGATIVE_REGULATION_OF_PROTEIN_LOCALIZATION_TO_NUCLEUS	32	0.532549	1.51263	0.0192719	0.116646	1	2545	tags=28%, list=17%, signal=34%
GOBP_RESPONSE_TO_PROSTAGLANDIN_E	GOBP_RESPONSE_TO_PROSTAGLANDIN_E	22	0.626414	1.51259	0.0304878	0.116572	1	1356	tags=32%, list=9%, signal=35%
GOBP_POSITIVE_REGULATION_OF_NEURON_PROJECTION_DEVELOPMENT	GOBP_POSITIVE_REGULATION_OF_NEURON_PROJECTION_DEVELOPMENT	134	0.46053	1.51153	0.0181087	0.117403	1	3750	tags=38%, list=24%, signal=50%
GOBP_RESPONSE_TO_PURINE_CONTAINING_COMPOUND	GOBP_RESPONSE_TO_PURINE_CONTAINING_COMPOUND	126	0.488164	1.5114	0.00610998	0.11738	1	2672	tags=36%, list=17%, signal=43%
GOBP_VESICLE_ORGANIZATION	GOBP_VESICLE_ORGANIZATION	270	0.293203	1.51129	0.0156863	0.117334	1	5375	tags=36%, list=35%, signal=54%
GOBP_REGULATION_OF_PROTEIN_KINASE_A_SIGNALING	GOBP_REGULATION_OF_PROTEIN_KINASE_A_SIGNALING	16	0.64449	1.51106	0.0314342	0.117409	1	2182	tags=38%, list=14%, signal=44%
GOBP_REGULATION_OF_RECEPTOR_MEDIATED_ENDOCYTOSIS	GOBP_REGULATION_OF_RECEPTOR_MEDIATED_ENDOCYTOSIS	105	0.405989	1.51099	0.00801603	0.117335	1	4396	tags=37%, list=29%, signal=52%
GOBP_NEGATIVE_REGULATION_OF_PROTEIN_LOCALIZATION	GOBP_NEGATIVE_REGULATION_OF_PROTEIN_LOCALIZATION	171	0.391875	1.50989	0.0144033	0.118165	1	4811	tags=36%, list=31%, signal=51%
GOBP_CYTOKINE_PRODUCTION_INVOLVED_IN_INFLAMMATORY_RESPONSE	GOBP_CYTOKINE_PRODUCTION_INVOLVED_IN_INFLAMMATORY_RESPONSE	53	0.556624	1.50911	0.057377	0.11872	1	3098	tags=47%, list=20%, signal=59%
GOBP_REGULATION_OF_T_CELL_RECEPTOR_SIGNALING_PATHWAY	GOBP_REGULATION_OF_T_CELL_RECEPTOR_SIGNALING_PATHWAY	41	0.643176	1.5086	0.0613497	0.119041	1	2083	tags=37%, list=14%, signal=42%
GOBP_NEUROTROPHIN_TRK_RECEPTOR_SIGNALING_PATHWAY	GOBP_NEUROTROPHIN_TRK_RECEPTOR_SIGNALING_PATHWAY	23	0.527662	1.50834	0.0445344	0.1191	1	2113	tags=30%, list=14%, signal=35%
GOBP_POSITIVE_REGULATION_OF_MYELOID_CELL_DIFFERENTIATION	GOBP_POSITIVE_REGULATION_OF_MYELOID_CELL_DIFFERENTIATION	86	0.453617	1.50831	0.0402414	0.119006	1	4585	tags=51%, list=30%, signal=73%
GOBP_CELL_CELL_ADHESION_VIA_PLASMA_MEMBRANE_ADHESION_MOLECULES	GOBP_CELL_CELL_ADHESION_VIA_PLASMA_MEMBRANE_ADHESION_MOLECULES	236	0.522976	1.50804	0.00393701	0.119098	1	3631	tags=43%, list=24%, signal=56%
GOBP_ANTIFUNGAL_INNATE_IMMUNE_RESPONSE	GOBP_ANTIFUNGAL_INNATE_IMMUNE_RESPONSE	17	0.714084	1.50779	0.0307377	0.119189	1	2605	tags=59%, list=17%, signal=71%
GOBP_REGULATION_OF_PEPTIDASE_ACTIVITY	GOBP_REGULATION_OF_PEPTIDASE_ACTIVITY	395	0.426082	1.50759	0.00411523	0.119254	1	3160	tags=31%, list=21%, signal=39%
GOBP_REGULATION_OF_PROTEIN_SERINE_THREONINE_KINASE_ACTIVITY	GOBP_REGULATION_OF_PROTEIN_SERINE_THREONINE_KINASE_ACTIVITY	344	0.396105	1.50744	0.0123457	0.119278	1	3737	tags=35%, list=24%, signal=45%
GOBP_GLOMERULAR_EPITHELIUM_DEVELOPMENT	GOBP_GLOMERULAR_EPITHELIUM_DEVELOPMENT	25	0.593986	1.50741	0.027833	0.119195	1	4545	tags=64%, list=30%, signal=91%
GOBP_REGULATION_OF_RECEPTOR_SIGNALING_PATHWAY_VIA_STAT	GOBP_REGULATION_OF_RECEPTOR_SIGNALING_PATHWAY_VIA_STAT	95	0.48202	1.50735	0.0162272	0.11913	1	3610	tags=37%, list=24%, signal=48%
GOBP_EPITHELIAL_CELL_PROLIFERATION	GOBP_EPITHELIAL_CELL_PROLIFERATION	371	0.457256	1.50734	0.0100402	0.119014	1	3419	tags=36%, list=22%, signal=45%
GOBP_MYOTUBE_DIFFERENTIATION	GOBP_MYOTUBE_DIFFERENTIATION	105	0.454837	1.50728	0.00996016	0.118944	1	3195	tags=32%, list=21%, signal=41%
GOBP_REGULATION_OF_T_HELPER_17_TYPE_IMMUNE_RESPONSE	GOBP_REGULATION_OF_T_HELPER_17_TYPE_IMMUNE_RESPONSE	24	0.651747	1.50726	0.0328542	0.11884	1	3090	tags=54%, list=20%, signal=68%
GOBP_GAMMA_DELTA_T_CELL_ACTIVATION	GOBP_GAMMA_DELTA_T_CELL_ACTIVATION	17	0.711566	1.50711	0.0273109	0.118845	1	2492	tags=65%, list=16%, signal=77%
GOBP_POSITIVE_REGULATION_OF_CALCIUM_ION_TRANSMEMBRANE_TRANSPORT	GOBP_POSITIVE_REGULATION_OF_CALCIUM_ION_TRANSMEMBRANE_TRANSPORT	62	0.54488	1.50707	0.00788955	0.118757	1	3397	tags=48%, list=22%, signal=62%
GOBP_PHARYNGEAL_SYSTEM_DEVELOPMENT	GOBP_PHARYNGEAL_SYSTEM_DEVELOPMENT	26	0.602615	1.50707	0.0194932	0.118642	1	3596	tags=50%, list=23%, signal=65%
GOBP_NEGATIVE_REGULATION_OF_INTRACELLULAR_PROTEIN_TRANSPORT	GOBP_NEGATIVE_REGULATION_OF_INTRACELLULAR_PROTEIN_TRANSPORT	39	0.446617	1.50691	0.0475207	0.118648	1	2810	tags=21%, list=18%, signal=25%
GOBP_PEPTIDE_ANTIGEN_ASSEMBLY_WITH_MHC_PROTEIN_COMPLEX	GOBP_PEPTIDE_ANTIGEN_ASSEMBLY_WITH_MHC_PROTEIN_COMPLEX	15	0.752422	1.50667	0.0228216	0.118726	1	1976	tags=60%, list=13%, signal=69%
GOBP_REGULATION_OF_LEUKOCYTE_TETHERING_OR_ROLLING	GOBP_REGULATION_OF_LEUKOCYTE_TETHERING_OR_ROLLING	16	0.73371	1.50651	0.0238095	0.118728	1	2524	tags=69%, list=16%, signal=82%
GOBP_REGULATION_OF_STRIATED_MUSCLE_CONTRACTION	GOBP_REGULATION_OF_STRIATED_MUSCLE_CONTRACTION	85	0.484914	1.50631	0.0155642	0.118767	1	3676	tags=38%, list=24%, signal=49%
GOBP_DNA_CATABOLIC_PROCESS_ENDONUCLEOLYTIC	GOBP_DNA_CATABOLIC_PROCESS_ENDONUCLEOLYTIC	23	0.523727	1.50624	0.037182	0.118707	1	52	tags=9%, list=0%, signal=9%
GOBP_NEGATIVE_REGULATION_OF_NATURAL_KILLER_CELL_MEDIATED_IMMUNITY	GOBP_NEGATIVE_REGULATION_OF_NATURAL_KILLER_CELL_MEDIATED_IMMUNITY	15	0.719171	1.50555	0.0313152	0.119145	1	3459	tags=73%, list=23%, signal=95%
GOBP_BONE_RESORPTION	GOBP_BONE_RESORPTION	61	0.519842	1.50529	0.0214844	0.119214	1	4274	tags=56%, list=28%, signal=77%
GOBP_NEGATIVE_REGULATION_OF_B_CELL_MEDIATED_IMMUNITY	GOBP_NEGATIVE_REGULATION_OF_B_CELL_MEDIATED_IMMUNITY	16	0.696938	1.50523	0.039604	0.119142	1	3119	tags=63%, list=20%, signal=78%
GOBP_AORTA_DEVELOPMENT	GOBP_AORTA_DEVELOPMENT	58	0.517575	1.50501	0.0412371	0.119199	1	3440	tags=45%, list=22%, signal=58%
GOBP_ESTABLISHMENT_OR_MAINTENANCE_OF_CELL_POLARITY	GOBP_ESTABLISHMENT_OR_MAINTENANCE_OF_CELL_POLARITY	206	0.362419	1.50441	0.00607287	0.119611	1	3741	tags=28%, list=24%, signal=37%
GOBP_REGULATION_OF_THE_FORCE_OF_HEART_CONTRACTION	GOBP_REGULATION_OF_THE_FORCE_OF_HEART_CONTRACTION	25	0.620297	1.50428	0.0318091	0.11962	1	3397	tags=48%, list=22%, signal=62%
GOBP_PEROXISOME_PROLIFERATOR_ACTIVATED_RECEPTOR_SIGNALING_PATHWAY	GOBP_PEROXISOME_PROLIFERATOR_ACTIVATED_RECEPTOR_SIGNALING_PATHWAY	21	0.591118	1.50425	0.0372549	0.119523	1	3385	tags=48%, list=22%, signal=61%
GOBP_ASTROCYTE_DEVELOPMENT	GOBP_ASTROCYTE_DEVELOPMENT	37	0.624341	1.50392	0.0295983	0.119678	1	3377	tags=57%, list=22%, signal=73%
GOBP_DOPAMINE_METABOLIC_PROCESS	GOBP_DOPAMINE_METABOLIC_PROCESS	38	0.531551	1.50383	0.0182186	0.119634	1	2972	tags=37%, list=19%, signal=46%
GOBP_PHASIC_SMOOTH_MUSCLE_CONTRACTION	GOBP_PHASIC_SMOOTH_MUSCLE_CONTRACTION	22	0.621728	1.50303	0.0224033	0.120177	1	2516	tags=41%, list=16%, signal=49%
GOBP_POSITIVE_REGULATION_OF_EXTRINSIC_APOPTOTIC_SIGNALING_PATHWAY	GOBP_POSITIVE_REGULATION_OF_EXTRINSIC_APOPTOTIC_SIGNALING_PATHWAY	48	0.48807	1.50225	0.0510204	0.120715	1	1992	tags=25%, list=13%, signal=29%
GOBP_PHOSPHATIDYLSERINE_METABOLIC_PROCESS	GOBP_PHOSPHATIDYLSERINE_METABOLIC_PROCESS	25	0.533399	1.50209	0.0503018	0.120725	1	5155	tags=56%, list=34%, signal=84%
GOBP_NEGATIVE_REGULATION_OF_CARDIAC_MUSCLE_TISSUE_GROWTH	GOBP_NEGATIVE_REGULATION_OF_CARDIAC_MUSCLE_TISSUE_GROWTH	21	0.54979	1.50169	0.0753564	0.120938	1	4187	tags=52%, list=27%, signal=72%
GOBP_REGULATION_OF_PROTEIN_TYROSINE_KINASE_ACTIVITY	GOBP_REGULATION_OF_PROTEIN_TYROSINE_KINASE_ACTIVITY	78	0.456719	1.50157	0.0325203	0.120919	1	3002	tags=37%, list=20%, signal=46%
GOBP_ENDOTHELIAL_CELL_APOPTOTIC_PROCESS	GOBP_ENDOTHELIAL_CELL_APOPTOTIC_PROCESS	52	0.577128	1.50117	0.0416667	0.121163	1	1610	tags=38%, list=10%, signal=43%
GOBP_NEGATIVE_REGULATION_OF_MYELOID_LEUKOCYTE_DIFFERENTIATION	GOBP_NEGATIVE_REGULATION_OF_MYELOID_LEUKOCYTE_DIFFERENTIATION	45	0.530387	1.50102	0.0447154	0.121174	1	3806	tags=49%, list=25%, signal=65%
GOBP_POSITIVE_REGULATION_OF_INTERFERON_ALPHA_PRODUCTION	GOBP_POSITIVE_REGULATION_OF_INTERFERON_ALPHA_PRODUCTION	21	0.588066	1.50051	0.0826446	0.121478	1	2323	tags=29%, list=15%, signal=34%
GOBP_RESPONSE_TO_PROTOZOAN	GOBP_RESPONSE_TO_PROTOZOAN	23	0.698735	1.49973	0.0318725	0.122026	1	3314	tags=70%, list=22%, signal=89%
GOBP_PHOSPHATE_ION_TRANSMEMBRANE_TRANSPORT	GOBP_PHOSPHATE_ION_TRANSMEMBRANE_TRANSPORT	16	0.54605	1.49929	0.0428571	0.122303	1	682	tags=13%, list=4%, signal=13%
GOBP_NEGATIVE_REGULATION_OF_VASCULAR_ASSOCIATED_SMOOTH_MUSCLE_CELL_PROLIFERATION	GOBP_NEGATIVE_REGULATION_OF_VASCULAR_ASSOCIATED_SMOOTH_MUSCLE_CELL_PROLIFERATION	21	0.638311	1.49922	0.0414201	0.122236	1	4729	tags=67%, list=31%, signal=96%
GOBP_CYTOPLASMIC_PATTERN_RECOGNITION_RECEPTOR_SIGNALING_PATHWAY_IN_RESPONSE_TO_VIRUS	GOBP_CYTOPLASMIC_PATTERN_RECOGNITION_RECEPTOR_SIGNALING_PATHWAY_IN_RESPONSE_TO_VIRUS	29	0.462727	1.49919	0.125253	0.122135	1	3900	tags=34%, list=25%, signal=46%
GOBP_NEGATIVE_REGULATION_OF_ADENYLATE_CYCLASE_ACTIVITY	GOBP_NEGATIVE_REGULATION_OF_ADENYLATE_CYCLASE_ACTIVITY	20	0.600265	1.49896	0.0319361	0.122197	1	2736	tags=40%, list=18%, signal=49%
GOBP_TOLERANCE_INDUCTION	GOBP_TOLERANCE_INDUCTION	28	0.661263	1.49894	0.0443038	0.1221	1	3737	tags=71%, list=24%, signal=94%
GOBP_REGULATION_OF_CD8_POSITIVE_ALPHA_BETA_T_CELL_ACTIVATION	GOBP_REGULATION_OF_CD8_POSITIVE_ALPHA_BETA_T_CELL_ACTIVATION	16	0.734381	1.49884	0.0474227	0.122065	1	2849	tags=69%, list=19%, signal=84%
GOBP_MUSCLE_HYPERTROPHY	GOBP_MUSCLE_HYPERTROPHY	79	0.485372	1.49883	0.0251451	0.121964	1	3922	tags=38%, list=26%, signal=51%
GOBP_RESPONSE_TO_CHEMOKINE	GOBP_RESPONSE_TO_CHEMOKINE	77	0.650283	1.49858	0.0360721	0.122037	1	2532	tags=53%, list=16%, signal=63%
GOBP_POSITIVE_REGULATION_OF_B_CELL_ACTIVATION	GOBP_POSITIVE_REGULATION_OF_B_CELL_ACTIVATION	70	0.557248	1.49844	0.0761099	0.122031	1	2538	tags=36%, list=17%, signal=43%
GOBP_IMMUNOLOGICAL_SYNAPSE_FORMATION	GOBP_IMMUNOLOGICAL_SYNAPSE_FORMATION	15	0.756848	1.49839	0.0309917	0.121956	1	2695	tags=67%, list=18%, signal=81%
GOBP_ARTERY_MORPHOGENESIS	GOBP_ARTERY_MORPHOGENESIS	69	0.507369	1.49834	0.0273438	0.121878	1	3440	tags=45%, list=22%, signal=58%
GOBP_POSITIVE_REGULATION_OF_BEHAVIOR	GOBP_POSITIVE_REGULATION_OF_BEHAVIOR	21	0.617642	1.49829	0.0222672	0.121814	1	1490	tags=33%, list=10%, signal=37%
GOBP_POSITIVE_REGULATION_OF_MACROPHAGE_DERIVED_FOAM_CELL_DIFFERENTIATION	GOBP_POSITIVE_REGULATION_OF_MACROPHAGE_DERIVED_FOAM_CELL_DIFFERENTIATION	18	0.728851	1.4981	0.0217391	0.121842	1	3091	tags=72%, list=20%, signal=90%
GOBP_RECEPTOR_INTERNALIZATION	GOBP_RECEPTOR_INTERNALIZATION	106	0.445971	1.49785	0.031746	0.121942	1	5022	tags=46%, list=33%, signal=68%
GOBP_NEGATIVE_REGULATION_OF_INTRACELLULAR_TRANSPORT	GOBP_NEGATIVE_REGULATION_OF_INTRACELLULAR_TRANSPORT	52	0.438028	1.49721	0.0414079	0.122407	1	2810	tags=21%, list=18%, signal=26%
GOBP_POSITIVE_REGULATION_OF_EPITHELIAL_CELL_PROLIFERATION	GOBP_POSITIVE_REGULATION_OF_EPITHELIAL_CELL_PROLIFERATION	176	0.483565	1.49698	0.0214425	0.122504	1	3419	tags=36%, list=22%, signal=46%
GOBP_RESPONSE_TO_INTERFERON_BETA	GOBP_RESPONSE_TO_INTERFERON_BETA	27	0.562266	1.49697	0.105691	0.122387	1	3320	tags=41%, list=22%, signal=52%
GOBP_REGULATION_OF_SYSTEMIC_ARTERIAL_BLOOD_PRESSURE	GOBP_REGULATION_OF_SYSTEMIC_ARTERIAL_BLOOD_PRESSURE	90	0.529369	1.49685	0.0138889	0.12238	1	4109	tags=51%, list=27%, signal=69%
GOBP_REGULATION_OF_PLATELET_AGGREGATION	GOBP_REGULATION_OF_PLATELET_AGGREGATION	26	0.629256	1.49614	0.0383065	0.12284	1	3111	tags=54%, list=20%, signal=67%
GOBP_PROTEIN_POLYMERIZATION	GOBP_PROTEIN_POLYMERIZATION	243	0.376803	1.49594	0.0145833	0.122916	1	4267	tags=37%, list=28%, signal=50%
GOBP_POSITIVE_REGULATION_OF_NEUTROPHIL_MIGRATION	GOBP_POSITIVE_REGULATION_OF_NEUTROPHIL_MIGRATION	30	0.600154	1.4958	0.0372549	0.122896	1	2907	tags=50%, list=19%, signal=62%
GOBP_CELLULAR_RESPONSE_TO_STEROID_HORMONE_STIMULUS	GOBP_CELLULAR_RESPONSE_TO_STEROID_HORMONE_STIMULUS	180	0.378025	1.49575	0.00406504	0.122804	1	4805	tags=36%, list=31%, signal=52%
GOBP_POSITIVE_REGULATION_OF_CELLULAR_CARBOHYDRATE_METABOLIC_PROCESS	GOBP_POSITIVE_REGULATION_OF_CELLULAR_CARBOHYDRATE_METABOLIC_PROCESS	49	0.482893	1.49538	0.0223124	0.122997	1	1436	tags=22%, list=9%, signal=25%
GOBP_REGULATION_OF_PROTEIN_CATABOLIC_PROCESS	GOBP_REGULATION_OF_PROTEIN_CATABOLIC_PROCESS	357	0.281366	1.49527	0.0179641	0.122981	1	4015	tags=25%, list=26%, signal=33%
GOBP_PHOSPHATIDYLINOSITOL_METABOLIC_PROCESS	GOBP_PHOSPHATIDYLINOSITOL_METABOLIC_PROCESS	145	0.337537	1.49518	0.00988142	0.122925	1	4583	tags=38%, list=30%, signal=54%
GOBP_SODIUM_ION_HOMEOSTASIS	GOBP_SODIUM_ION_HOMEOSTASIS	53	0.549912	1.49515	0.028169	0.122828	1	3029	tags=38%, list=20%, signal=47%
GOBP_NEGATIVE_REGULATION_OF_NUCLEOCYTOPLASMIC_TRANSPORT	GOBP_NEGATIVE_REGULATION_OF_NUCLEOCYTOPLASMIC_TRANSPORT	21	0.505948	1.49513	0.0521921	0.122721	1	3357	tags=33%, list=22%, signal=43%
GOBP_NEURON_CELLULAR_HOMEOSTASIS	GOBP_NEURON_CELLULAR_HOMEOSTASIS	31	0.562657	1.49375	0.0355731	0.123764	1	3147	tags=39%, list=20%, signal=49%
GOBP_T_HELPER_2_CELL_DIFFERENTIATION	GOBP_T_HELPER_2_CELL_DIFFERENTIATION	15	0.645538	1.49374	0.0644491	0.123663	1	3486	tags=53%, list=23%, signal=69%
GOBP_PHOSPHOLIPASE_C_ACTIVATING_G_PROTEIN_COUPLED_RECEPTOR_SIGNALING_PATHWAY	GOBP_PHOSPHOLIPASE_C_ACTIVATING_G_PROTEIN_COUPLED_RECEPTOR_SIGNALING_PATHWAY	97	0.547816	1.49347	0.0141129	0.123786	1	3677	tags=48%, list=24%, signal=63%
GOBP_MUSCLE_CELL_DIFFERENTIATION	GOBP_MUSCLE_CELL_DIFFERENTIATION	325	0.437463	1.49344	0.0156863	0.123678	1	3627	tags=35%, list=24%, signal=45%
GOBP_POSITIVE_REGULATION_OF_OSSIFICATION	GOBP_POSITIVE_REGULATION_OF_OSSIFICATION	47	0.554374	1.49312	0.0181818	0.123847	1	3596	tags=49%, list=23%, signal=64%
GOBP_REGULATION_OF_SMOOTH_MUSCLE_CONTRACTION	GOBP_REGULATION_OF_SMOOTH_MUSCLE_CONTRACTION	57	0.56268	1.49292	0.0142276	0.123902	1	2548	tags=40%, list=17%, signal=48%
GOBP_REGULATION_OF_VASCULAR_ENDOTHELIAL_GROWTH_FACTOR_RECEPTOR_SIGNALING_PATHWAY	GOBP_REGULATION_OF_VASCULAR_ENDOTHELIAL_GROWTH_FACTOR_RECEPTOR_SIGNALING_PATHWAY	26	0.565879	1.4927	0.042885	0.12396	1	2966	tags=42%, list=19%, signal=52%
GOBP_POSITIVE_REGULATION_OF_T_CELL_MEDIATED_CYTOTOXICITY	GOBP_POSITIVE_REGULATION_OF_T_CELL_MEDIATED_CYTOTOXICITY	25	0.704032	1.49214	0.0301811	0.124294	1	1916	tags=52%, list=12%, signal=59%
GOBP_POSITIVE_REGULATION_OF_HEART_GROWTH	GOBP_POSITIVE_REGULATION_OF_HEART_GROWTH	31	0.617188	1.49178	0.0447154	0.124483	1	2516	tags=48%, list=16%, signal=58%
GOBP_POSITIVE_REGULATION_OF_CATION_CHANNEL_ACTIVITY	GOBP_POSITIVE_REGULATION_OF_CATION_CHANNEL_ACTIVITY	61	0.52616	1.49151	0.00972763	0.124568	1	2995	tags=48%, list=20%, signal=59%
GOBP_REGULATION_OF_APOPTOTIC_SIGNALING_PATHWAY	GOBP_REGULATION_OF_APOPTOTIC_SIGNALING_PATHWAY	322	0.355936	1.4904	0.0208333	0.125388	1	3136	tags=20%, list=20%, signal=25%
GOBP_REGULATION_OF_CARDIAC_MUSCLE_CONTRACTION	GOBP_REGULATION_OF_CARDIAC_MUSCLE_CONTRACTION	69	0.484777	1.49022	0.0199601	0.125422	1	3676	tags=39%, list=24%, signal=51%
GOBP_AMINOGLYCAN_CATABOLIC_PROCESS	GOBP_AMINOGLYCAN_CATABOLIC_PROCESS	29	0.576689	1.48975	0.0241935	0.125696	1	2943	tags=38%, list=19%, signal=47%
GOBP_RESPONSE_TO_TYPE_I_INTERFERON	GOBP_RESPONSE_TO_TYPE_I_INTERFERON	58	0.447521	1.48962	0.136555	0.1257	1	3441	tags=31%, list=22%, signal=40%
GOBP_REGULATION_OF_BIOMINERALIZATION	GOBP_REGULATION_OF_BIOMINERALIZATION	90	0.511076	1.48942	0.0226337	0.125747	1	3717	tags=42%, list=24%, signal=55%
GOBP_PHOSPHATIDYLCHOLINE_METABOLIC_PROCESS	GOBP_PHOSPHATIDYLCHOLINE_METABOLIC_PROCESS	67	0.485726	1.48938	0.0365854	0.125668	1	3259	tags=40%, list=21%, signal=51%
GOBP_MEMBRANE_REPOLARIZATION	GOBP_MEMBRANE_REPOLARIZATION	44	0.596281	1.48937	0.046371	0.125555	1	2387	tags=36%, list=16%, signal=43%
GOBP_NEGATIVE_REGULATION_OF_POTASSIUM_ION_TRANSPORT	GOBP_NEGATIVE_REGULATION_OF_POTASSIUM_ION_TRANSPORT	28	0.649508	1.48934	0.022	0.125453	1	2089	tags=39%, list=14%, signal=45%
GOBP_RESPONSE_TO_STEROID_HORMONE	GOBP_RESPONSE_TO_STEROID_HORMONE	300	0.406765	1.48915	0.012024	0.125516	1	2910	tags=23%, list=19%, signal=28%
GOBP_PROTEIN_KINASE_C_SIGNALING	GOBP_PROTEIN_KINASE_C_SIGNALING	30	0.548463	1.48915	0.0389864	0.125411	1	3899	tags=50%, list=25%, signal=67%
GOBP_MEMBRANE_DEPOLARIZATION_DURING_ACTION_POTENTIAL	GOBP_MEMBRANE_DEPOLARIZATION_DURING_ACTION_POTENTIAL	35	0.647424	1.4889	0.0337302	0.125526	1	1440	tags=34%, list=9%, signal=38%
GOBP_NEGATIVE_REGULATION_OF_ION_TRANSPORT	GOBP_NEGATIVE_REGULATION_OF_ION_TRANSPORT	126	0.497155	1.48858	0.0181452	0.125652	1	3627	tags=41%, list=24%, signal=54%
GOBP_CELLULAR_RESPONSE_TO_INTERFERON_BETA	GOBP_CELLULAR_RESPONSE_TO_INTERFERON_BETA	20	0.577709	1.48847	0.0784708	0.125628	1	2766	tags=35%, list=18%, signal=43%
GOBP_GOLGI_TO_ENDOSOME_TRANSPORT	GOBP_GOLGI_TO_ENDOSOME_TRANSPORT	15	0.455244	1.48821	0.0885312	0.125736	1	5964	tags=60%, list=39%, signal=98%
GOBP_REGULATION_OF_MONOCYTE_CHEMOTAXIS	GOBP_REGULATION_OF_MONOCYTE_CHEMOTAXIS	24	0.658304	1.48785	0.0649895	0.125976	1	2902	tags=63%, list=19%, signal=77%
GOBP_CELLULAR_RESPONSE_TO_REACTIVE_OXYGEN_SPECIES	GOBP_CELLULAR_RESPONSE_TO_REACTIVE_OXYGEN_SPECIES	127	0.382209	1.48777	0.0376984	0.125922	1	2794	tags=25%, list=18%, signal=31%
GOBP_NEGATIVE_REGULATION_OF_TRANSMEMBRANE_RECEPTOR_PROTEIN_SERINE_THREONINE_KINASE_SIGNALING_PATHWAY	GOBP_NEGATIVE_REGULATION_OF_TRANSMEMBRANE_RECEPTOR_PROTEIN_SERINE_THREONINE_KINASE_SIGNALING_PATHWAY	113	0.476534	1.48768	0.0188285	0.125905	1	3417	tags=31%, list=22%, signal=40%
GOBP_REGULATION_OF_HUMORAL_IMMUNE_RESPONSE_MEDIATED_BY_CIRCULATING_IMMUNOGLOBULIN	GOBP_REGULATION_OF_HUMORAL_IMMUNE_RESPONSE_MEDIATED_BY_CIRCULATING_IMMUNOGLOBULIN	18	0.73297	1.48743	0.0263158	0.12598	1	2508	tags=72%, list=16%, signal=86%
GOBP_REGULATION_OF_PROTEIN_DEPOLYMERIZATION	GOBP_REGULATION_OF_PROTEIN_DEPOLYMERIZATION	77	0.456951	1.48736	0.0383065	0.125945	1	4574	tags=53%, list=30%, signal=75%
GOBP_REGULATION_OF_GLUCOSE_TRANSMEMBRANE_TRANSPORT	GOBP_REGULATION_OF_GLUCOSE_TRANSMEMBRANE_TRANSPORT	67	0.45821	1.48714	0.0245399	0.125995	1	3259	tags=33%, list=21%, signal=41%
GOBP_BASEMENT_MEMBRANE_ORGANIZATION	GOBP_BASEMENT_MEMBRANE_ORGANIZATION	32	0.566164	1.48689	0.0523139	0.126105	1	3322	tags=38%, list=22%, signal=48%
GOBP_ACTIN_FILAMENT_BASED_MOVEMENT	GOBP_ACTIN_FILAMENT_BASED_MOVEMENT	124	0.481318	1.48639	0.0137255	0.126408	1	2617	tags=31%, list=17%, signal=38%
GOBP_GLOMERULAR_EPITHELIAL_CELL_DIFFERENTIATION	GOBP_GLOMERULAR_EPITHELIAL_CELL_DIFFERENTIATION	22	0.592205	1.48631	0.0349515	0.126363	1	3419	tags=50%, list=22%, signal=64%
GOBP_RHYTHMIC_BEHAVIOR	GOBP_RHYTHMIC_BEHAVIOR	39	0.512165	1.48624	0.0302419	0.126313	1	1611	tags=26%, list=10%, signal=29%
GOBP_NEGATIVE_REGULATION_OF_CARBOHYDRATE_METABOLIC_PROCESS	GOBP_NEGATIVE_REGULATION_OF_CARBOHYDRATE_METABOLIC_PROCESS	40	0.45519	1.486	0.0425963	0.126413	1	2788	tags=20%, list=18%, signal=24%
GOBP_T_CELL_HOMEOSTASIS	GOBP_T_CELL_HOMEOSTASIS	38	0.577311	1.48592	0.0673684	0.126371	1	3035	tags=42%, list=20%, signal=52%
GOBP_T_HELPER_CELL_LINEAGE_COMMITMENT	GOBP_T_HELPER_CELL_LINEAGE_COMMITMENT	17	0.725635	1.48568	0.0539419	0.126474	1	2098	tags=53%, list=14%, signal=61%
GOBP_HEART_GROWTH	GOBP_HEART_GROWTH	74	0.499823	1.48546	0.0298805	0.126595	1	4187	tags=49%, list=27%, signal=67%
GOBP_AUTOPHAGOSOME_MATURATION	GOBP_AUTOPHAGOSOME_MATURATION	52	0.292916	1.48534	0.0723141	0.126583	1	122	tags=4%, list=1%, signal=4%
GOBP_REGULATION_OF_LIPID_METABOLIC_PROCESS	GOBP_REGULATION_OF_LIPID_METABOLIC_PROCESS	296	0.411864	1.48515	0.0121704	0.126631	1	3318	tags=31%, list=22%, signal=39%
GOBP_ATRIAL_SEPTUM_DEVELOPMENT	GOBP_ATRIAL_SEPTUM_DEVELOPMENT	21	0.572678	1.48459	0.0649087	0.126967	1	3596	tags=52%, list=23%, signal=68%
GOBP_NEGATIVE_REGULATION_OF_FIBROBLAST_PROLIFERATION	GOBP_NEGATIVE_REGULATION_OF_FIBROBLAST_PROLIFERATION	27	0.441415	1.48439	0.0969072	0.127017	1	4710	tags=41%, list=31%, signal=59%
GOBP_PROTEIN_LOCALIZATION_TO_CELL_PERIPHERY	GOBP_PROTEIN_LOCALIZATION_TO_CELL_PERIPHERY	314	0.348944	1.48427	0.0182556	0.127011	1	3195	tags=25%, list=21%, signal=30%
GOBP_NEGATIVE_REGULATION_OF_RHO_PROTEIN_SIGNAL_TRANSDUCTION	GOBP_NEGATIVE_REGULATION_OF_RHO_PROTEIN_SIGNAL_TRANSDUCTION	21	0.53794	1.48421	0.0591716	0.126962	1	4236	tags=48%, list=28%, signal=66%
GOBP_REGULATION_OF_LAMELLIPODIUM_ASSEMBLY	GOBP_REGULATION_OF_LAMELLIPODIUM_ASSEMBLY	36	0.459841	1.48389	0.0438247	0.127132	1	3794	tags=36%, list=25%, signal=48%
GOBP_CHOLESTEROL_STORAGE	GOBP_CHOLESTEROL_STORAGE	18	0.645123	1.48361	0.0509165	0.127262	1	4016	tags=61%, list=26%, signal=83%
GOBP_POSITIVE_REGULATION_OF_PROTEIN_LOCALIZATION_TO_CELL_SURFACE	GOBP_POSITIVE_REGULATION_OF_PROTEIN_LOCALIZATION_TO_CELL_SURFACE	17	0.597567	1.4834	0.0389344	0.127347	1	1416	tags=29%, list=9%, signal=32%
GOBP_POSITIVE_REGULATION_OF_INTRACELLULAR_PROTEIN_TRANSPORT	GOBP_POSITIVE_REGULATION_OF_INTRACELLULAR_PROTEIN_TRANSPORT	137	0.307785	1.48315	0.0315582	0.12744	1	3568	tags=23%, list=23%, signal=29%
GOBP_ACTIN_NUCLEATION	GOBP_ACTIN_NUCLEATION	44	0.415915	1.48239	0.0614754	0.12798	1	2739	tags=25%, list=18%, signal=30%
GOBP_EPITHELIAL_CELL_APOPTOTIC_PROCESS	GOBP_EPITHELIAL_CELL_APOPTOTIC_PROCESS	101	0.477285	1.48197	0.0233051	0.128235	1	3409	tags=42%, list=22%, signal=53%
GOBP_TEMPERATURE_HOMEOSTASIS	GOBP_TEMPERATURE_HOMEOSTASIS	172	0.440293	1.48194	0.00808081	0.128146	1	2485	tags=27%, list=16%, signal=32%
GOBP_REGULATION_OF_ALCOHOL_BIOSYNTHETIC_PROCESS	GOBP_REGULATION_OF_ALCOHOL_BIOSYNTHETIC_PROCESS	47	0.506912	1.48127	0.0270833	0.128626	1	1541	tags=26%, list=10%, signal=28%
GOBP_ENSHEATHMENT_OF_NEURONS	GOBP_ENSHEATHMENT_OF_NEURONS	130	0.451669	1.48036	0.0251938	0.129252	1	2364	tags=28%, list=15%, signal=32%
GOBP_CELL_PROJECTION_ASSEMBLY	GOBP_CELL_PROJECTION_ASSEMBLY	494	0.399401	1.48011	0.0395257	0.129345	1	4875	tags=41%, list=32%, signal=59%
GOBP_AMYLOID_FIBRIL_FORMATION	GOBP_AMYLOID_FIBRIL_FORMATION	28	0.462536	1.48008	0.0681818	0.129252	1	3035	tags=36%, list=20%, signal=44%
GOBP_CELLULAR_RESPONSE_TO_FLUID_SHEAR_STRESS	GOBP_CELLULAR_RESPONSE_TO_FLUID_SHEAR_STRESS	19	0.599051	1.47989	0.0565657	0.129282	1	4534	tags=63%, list=30%, signal=90%
GOBP_EXTERNAL_ENCAPSULATING_STRUCTURE_ORGANIZATION	GOBP_EXTERNAL_ENCAPSULATING_STRUCTURE_ORGANIZATION	283	0.517742	1.47955	0.0397614	0.129475	1	3392	tags=39%, list=22%, signal=49%
GOBP_LYMPHOCYTE_CHEMOTAXIS	GOBP_LYMPHOCYTE_CHEMOTAXIS	45	0.647756	1.47899	0.0635246	0.129863	1	2998	tags=51%, list=20%, signal=63%
GOBP_NEURON_DEATH	GOBP_NEURON_DEATH	317	0.377228	1.47881	0.010101	0.129887	1	3474	tags=30%, list=23%, signal=38%
GOBP_RESPONSE_TO_OXIDATIVE_STRESS	GOBP_RESPONSE_TO_OXIDATIVE_STRESS	385	0.346611	1.47875	0.0199203	0.129819	1	3528	tags=26%, list=23%, signal=33%
GOBP_REGULATION_OF_PROTEIN_LOCALIZATION_TO_MEMBRANE	GOBP_REGULATION_OF_PROTEIN_LOCALIZATION_TO_MEMBRANE	150	0.375009	1.47809	0.0263158	0.130229	1	3186	tags=27%, list=21%, signal=34%
GOBP_NEGATIVE_REGULATION_OF_BMP_SIGNALING_PATHWAY	GOBP_NEGATIVE_REGULATION_OF_BMP_SIGNALING_PATHWAY	49	0.546459	1.47791	0.0265306	0.13029	1	3977	tags=37%, list=26%, signal=49%
GOBP_GTP_METABOLIC_PROCESS	GOBP_GTP_METABOLIC_PROCESS	22	0.457602	1.47715	0.0613497	0.130787	1	764	tags=14%, list=5%, signal=14%
GOBP_RESPONSE_TO_CORTICOSTEROID	GOBP_RESPONSE_TO_CORTICOSTEROID	145	0.454794	1.47711	0.0195695	0.130716	1	2699	tags=28%, list=18%, signal=34%
GOBP_STEROID_HORMONE_MEDIATED_SIGNALING_PATHWAY	GOBP_STEROID_HORMONE_MEDIATED_SIGNALING_PATHWAY	122	0.386428	1.47699	0.0334029	0.130695	1	5057	tags=38%, list=33%, signal=56%
GOBP_REGULATION_OF_B_CELL_RECEPTOR_SIGNALING_PATHWAY	GOBP_REGULATION_OF_B_CELL_RECEPTOR_SIGNALING_PATHWAY	19	0.736165	1.47678	0.0475248	0.130745	1	3104	tags=74%, list=20%, signal=92%
GOBP_LONG_TERM_MEMORY	GOBP_LONG_TERM_MEMORY	35	0.547384	1.47638	0.0181087	0.130974	1	3617	tags=46%, list=24%, signal=60%
GOBP_MELANOCYTE_DIFFERENTIATION	GOBP_MELANOCYTE_DIFFERENTIATION	23	0.612276	1.47577	0.032882	0.131364	1	2466	tags=48%, list=16%, signal=57%
GOBP_POSITIVE_REGULATION_OF_EXTRACELLULAR_MATRIX_ORGANIZATION	GOBP_POSITIVE_REGULATION_OF_EXTRACELLULAR_MATRIX_ORGANIZATION	22	0.590423	1.47571	0.0777096	0.131305	1	5376	tags=73%, list=35%, signal=112%
GOBP_HYDROGEN_PEROXIDE_METABOLIC_PROCESS	GOBP_HYDROGEN_PEROXIDE_METABOLIC_PROCESS	47	0.50574	1.4756	0.0181818	0.131266	1	1965	tags=23%, list=13%, signal=27%
GOBP_DEVELOPMENTAL_PIGMENTATION	GOBP_DEVELOPMENTAL_PIGMENTATION	43	0.500093	1.47515	0.0270793	0.131543	1	2762	tags=33%, list=18%, signal=40%
GOBP_PLATELET_ACTIVATION	GOBP_PLATELET_ACTIVATION	123	0.498314	1.47494	0.0335968	0.131622	1	3361	tags=42%, list=22%, signal=54%
GOBP_PROTEIN_TETRAMERIZATION	GOBP_PROTEIN_TETRAMERIZATION	85	0.421802	1.47447	0.015748	0.131945	1	3312	tags=27%, list=22%, signal=34%
GOBP_NEURON_MATURATION	GOBP_NEURON_MATURATION	44	0.523358	1.47444	0.0295359	0.131844	1	2249	tags=30%, list=15%, signal=35%
GOBP_REGULATION_OF_PROTEIN_EXPORT_FROM_NUCLEUS	GOBP_REGULATION_OF_PROTEIN_EXPORT_FROM_NUCLEUS	31	0.387157	1.47412	0.0809717	0.132013	1	3772	tags=26%, list=25%, signal=34%
GOBP_POSITIVE_REGULATION_OF_P38MAPK_CASCADE	GOBP_POSITIVE_REGULATION_OF_P38MAPK_CASCADE	27	0.566556	1.47359	0.0376984	0.132397	1	3385	tags=48%, list=22%, signal=62%
GOBP_POSITIVE_REGULATION_OF_MAST_CELL_ACTIVATION	GOBP_POSITIVE_REGULATION_OF_MAST_CELL_ACTIVATION	20	0.608272	1.47337	0.0529532	0.132473	1	3393	tags=50%, list=22%, signal=64%
GOBP_REGULATION_OF_CELLULAR_RESPONSE_TO_VASCULAR_ENDOTHELIAL_GROWTH_FACTOR_STIMULUS	GOBP_REGULATION_OF_CELLULAR_RESPONSE_TO_VASCULAR_ENDOTHELIAL_GROWTH_FACTOR_STIMULUS	21	0.6059	1.47316	0.0323232	0.132567	1	3167	tags=52%, list=21%, signal=66%
GOBP_REGULATION_OF_VIRAL_GENOME_REPLICATION	GOBP_REGULATION_OF_VIRAL_GENOME_REPLICATION	76	0.44732	1.47311	0.0903491	0.132474	1	4140	tags=37%, list=27%, signal=50%
GOBP_REGULATED_EXOCYTOSIS	GOBP_REGULATED_EXOCYTOSIS	215	0.44902	1.47306	0.0141988	0.132393	1	3118	tags=33%, list=20%, signal=41%
GOBP_POSITIVE_REGULATION_OF_ACTIN_FILAMENT_BUNDLE_ASSEMBLY	GOBP_POSITIVE_REGULATION_OF_ACTIN_FILAMENT_BUNDLE_ASSEMBLY	57	0.463052	1.47293	0.055102	0.132387	1	4767	tags=44%, list=31%, signal=63%
GOBP_VESICLE_MEDIATED_TRANSPORT_BETWEEN_ENDOSOMAL_COMPARTMENTS	GOBP_VESICLE_MEDIATED_TRANSPORT_BETWEEN_ENDOSOMAL_COMPARTMENTS	41	0.339782	1.47208	0.0963115	0.13302	1	2744	tags=17%, list=18%, signal=21%
GOBP_HEAT_GENERATION	GOBP_HEAT_GENERATION	16	0.704195	1.47193	0.0403226	0.133031	1	2355	tags=75%, list=15%, signal=88%
GOBP_STEROL_TRANSPORT	GOBP_STEROL_TRANSPORT	112	0.444921	1.47137	0.0346154	0.133438	1	4501	tags=46%, list=29%, signal=64%
GOBP_REGULATION_OF_ADENYLATE_CYCLASE_ACTIVITY	GOBP_REGULATION_OF_ADENYLATE_CYCLASE_ACTIVITY	29	0.531601	1.47094	0.0420842	0.133724	1	2736	tags=31%, list=18%, signal=38%
GOBP_POSITIVE_REGULATION_OF_AXONOGENESIS	GOBP_POSITIVE_REGULATION_OF_AXONOGENESIS	72	0.471906	1.47092	0.0271845	0.133615	1	3680	tags=38%, list=24%, signal=49%
GOBP_REGULATION_OF_JUN_KINASE_ACTIVITY	GOBP_REGULATION_OF_JUN_KINASE_ACTIVITY	59	0.461245	1.47055	0.0390144	0.1338	1	3087	tags=31%, list=20%, signal=38%
GOBP_POSITIVE_REGULATION_OF_CALCIUM_ION_TRANSMEMBRANE_TRANSPORTER_ACTIVITY	GOBP_POSITIVE_REGULATION_OF_CALCIUM_ION_TRANSMEMBRANE_TRANSPORTER_ACTIVITY	32	0.557957	1.47048	0.0481696	0.133736	1	3397	tags=47%, list=22%, signal=60%
GOBP_POSITIVE_REGULATION_OF_CARBOHYDRATE_METABOLIC_PROCESS	GOBP_POSITIVE_REGULATION_OF_CARBOHYDRATE_METABOLIC_PROCESS	69	0.469758	1.46987	0.0182186	0.134202	1	1436	tags=23%, list=9%, signal=25%
GOBP_SUBSTRATE_ADHESION_DEPENDENT_CELL_SPREADING	GOBP_SUBSTRATE_ADHESION_DEPENDENT_CELL_SPREADING	104	0.423415	1.46978	0.0453608	0.134164	1	4236	tags=42%, list=28%, signal=58%
GOBP_POSITIVE_REGULATION_OF_TRANSPORTER_ACTIVITY	GOBP_POSITIVE_REGULATION_OF_TRANSPORTER_ACTIVITY	100	0.475591	1.46969	0.00782779	0.134139	1	3453	tags=42%, list=22%, signal=54%
GOBP_BENZENE_CONTAINING_COMPOUND_METABOLIC_PROCESS	GOBP_BENZENE_CONTAINING_COMPOUND_METABOLIC_PROCESS	22	0.629814	1.46945	0.0471311	0.134229	1	3952	tags=73%, list=26%, signal=98%
GOBP_POSITIVE_REGULATION_OF_REACTIVE_OXYGEN_SPECIES_METABOLIC_PROCESS	GOBP_POSITIVE_REGULATION_OF_REACTIVE_OXYGEN_SPECIES_METABOLIC_PROCESS	62	0.510695	1.46896	0.0536779	0.134522	1	3845	tags=48%, list=25%, signal=64%
GOBP_INTERLEUKIN_17_PRODUCTION	GOBP_INTERLEUKIN_17_PRODUCTION	36	0.640916	1.46892	0.0672098	0.134438	1	2585	tags=56%, list=17%, signal=67%
GOBP_NEURON_DEATH_IN_RESPONSE_TO_OXIDATIVE_STRESS	GOBP_NEURON_DEATH_IN_RESPONSE_TO_OXIDATIVE_STRESS	30	0.476526	1.46883	0.0703934	0.134403	1	3437	tags=33%, list=22%, signal=43%
GOBP_PROTEIN_LOCALIZATION_TO_CILIUM	GOBP_PROTEIN_LOCALIZATION_TO_CILIUM	63	0.453587	1.46838	0.106426	0.134713	1	5446	tags=46%, list=35%, signal=71%
GOBP_NEGATIVE_REGULATION_OF_PROTEIN_BINDING	GOBP_NEGATIVE_REGULATION_OF_PROTEIN_BINDING	88	0.408563	1.46821	0.0325203	0.134774	1	2014	tags=18%, list=13%, signal=21%
GOBP_REGULATION_OF_SYSTEMIC_ARTERIAL_BLOOD_PRESSURE_BY_CIRCULATORY_RENIN_ANGIOTENSIN	GOBP_REGULATION_OF_SYSTEMIC_ARTERIAL_BLOOD_PRESSURE_BY_CIRCULATORY_RENIN_ANGIOTENSIN	16	0.74541	1.46757	0.0309917	0.135262	1	1012	tags=50%, list=7%, signal=53%
GOBP_POSITIVE_REGULATION_OF_REACTIVE_OXYGEN_SPECIES_BIOSYNTHETIC_PROCESS	GOBP_POSITIVE_REGULATION_OF_REACTIVE_OXYGEN_SPECIES_BIOSYNTHETIC_PROCESS	15	0.632545	1.46711	0.0525253	0.135526	1	3845	tags=53%, list=25%, signal=71%
GOBP_REGULATION_OF_SYSTEMIC_ARTERIAL_BLOOD_PRESSURE_BY_RENIN_ANGIOTENSIN	GOBP_REGULATION_OF_SYSTEMIC_ARTERIAL_BLOOD_PRESSURE_BY_RENIN_ANGIOTENSIN	24	0.692169	1.46617	0.0365112	0.136255	1	1988	tags=46%, list=13%, signal=53%
GOBP_NEGATIVE_REGULATION_OF_PHOSPHATASE_ACTIVITY	GOBP_NEGATIVE_REGULATION_OF_PHOSPHATASE_ACTIVITY	31	0.479295	1.46536	0.0498008	0.136872	1	3349	tags=32%, list=22%, signal=41%
GOBP_CARDIAC_MUSCLE_TISSUE_DEVELOPMENT	GOBP_CARDIAC_MUSCLE_TISSUE_DEVELOPMENT	205	0.459912	1.46527	0.0214425	0.136812	1	3627	tags=39%, list=24%, signal=50%
GOBP_REGULATION_OF_LAMELLIPODIUM_ORGANIZATION	GOBP_REGULATION_OF_LAMELLIPODIUM_ORGANIZATION	46	0.42216	1.46475	0.0437376	0.137162	1	4236	tags=41%, list=28%, signal=57%
GOBP_NEGATIVE_REGULATION_OF_CHEMOKINE_PRODUCTION	GOBP_NEGATIVE_REGULATION_OF_CHEMOKINE_PRODUCTION	20	0.634491	1.46446	0.060166	0.137239	1	3794	tags=55%, list=25%, signal=73%
GOBP_APOPTOTIC_DNA_FRAGMENTATION	GOBP_APOPTOTIC_DNA_FRAGMENTATION	16	0.605847	1.46426	0.0398406	0.137307	1	52	tags=13%, list=0%, signal=13%
GOBP_REGULATION_OF_MEMBRANE_DEPOLARIZATION	GOBP_REGULATION_OF_MEMBRANE_DEPOLARIZATION	43	0.502895	1.464	0.0359281	0.137416	1	3717	tags=47%, list=24%, signal=61%
GOBP_POSITIVE_REGULATION_OF_INTRACELLULAR_TRANSPORT	GOBP_POSITIVE_REGULATION_OF_INTRACELLULAR_TRANSPORT	172	0.297066	1.46379	0.0271318	0.137475	1	3568	tags=23%, list=23%, signal=30%
GOBP_HYPEROSMOTIC_RESPONSE	GOBP_HYPEROSMOTIC_RESPONSE	25	0.501787	1.46369	0.0441767	0.137438	1	1145	tags=20%, list=7%, signal=22%
GOBP_REGULATION_OF_NON_CANONICAL_WNT_SIGNALING_PATHWAY	GOBP_REGULATION_OF_NON_CANONICAL_WNT_SIGNALING_PATHWAY	24	0.596688	1.46346	0.0503018	0.137529	1	4859	tags=63%, list=32%, signal=91%
GOBP_CELLULAR_POLYSACCHARIDE_CATABOLIC_PROCESS	GOBP_CELLULAR_POLYSACCHARIDE_CATABOLIC_PROCESS	16	0.524905	1.46325	0.0501002	0.137628	1	3286	tags=31%, list=21%, signal=40%
GOBP_NEGATIVE_REGULATION_OF_PHOSPHOPROTEIN_PHOSPHATASE_ACTIVITY	GOBP_NEGATIVE_REGULATION_OF_PHOSPHOPROTEIN_PHOSPHATASE_ACTIVITY	23	0.521553	1.4632	0.0702811	0.137548	1	3207	tags=35%, list=21%, signal=44%
GOBP_ANTIGEN_PROCESSING_AND_PRESENTATION_OF_ENDOGENOUS_ANTIGEN	GOBP_ANTIGEN_PROCESSING_AND_PRESENTATION_OF_ENDOGENOUS_ANTIGEN	23	0.668063	1.4629	0.08159	0.137704	1	4349	tags=78%, list=28%, signal=109%
GOBP_POSITIVE_REGULATION_OF_CELLULAR_EXTRAVASATION	GOBP_POSITIVE_REGULATION_OF_CELLULAR_EXTRAVASATION	17	0.628831	1.46217	0.0529532	0.138281	1	2939	tags=47%, list=19%, signal=58%
GOBP_MYELOID_DENDRITIC_CELL_DIFFERENTIATION	GOBP_MYELOID_DENDRITIC_CELL_DIFFERENTIATION	17	0.641945	1.46198	0.0578512	0.138324	1	2304	tags=41%, list=15%, signal=48%
GOBP_POSITIVE_REGULATION_OF_RECEPTOR_SIGNALING_PATHWAY_VIA_STAT	GOBP_POSITIVE_REGULATION_OF_RECEPTOR_SIGNALING_PATHWAY_VIA_STAT	44	0.545335	1.46181	0.0303644	0.138363	1	4308	tags=57%, list=28%, signal=79%
GOBP_NEGATIVE_REGULATION_OF_MYELOID_CELL_DIFFERENTIATION	GOBP_NEGATIVE_REGULATION_OF_MYELOID_CELL_DIFFERENTIATION	72	0.462597	1.46165	0.0444444	0.13838	1	3806	tags=42%, list=25%, signal=55%
GOBP_CELLULAR_COMPONENT_DISASSEMBLY	GOBP_CELLULAR_COMPONENT_DISASSEMBLY	414	0.316059	1.46145	0.0141414	0.138426	1	4590	tags=30%, list=30%, signal=41%
GOBP_CARDIAC_MUSCLE_CONTRACTION	GOBP_CARDIAC_MUSCLE_CONTRACTION	124	0.478731	1.46135	0.0259481	0.138378	1	3717	tags=40%, list=24%, signal=52%
GOBP_AXONAL_FASCICULATION	GOBP_AXONAL_FASCICULATION	22	0.618083	1.46086	0.0511247	0.138755	1	3288	tags=50%, list=21%, signal=64%
GOBP_EXPORT_ACROSS_PLASMA_MEMBRANE	GOBP_EXPORT_ACROSS_PLASMA_MEMBRANE	57	0.542562	1.46071	0.0406977	0.138789	1	2341	tags=33%, list=15%, signal=39%
GOBP_CARDIAC_CHAMBER_MORPHOGENESIS	GOBP_CARDIAC_CHAMBER_MORPHOGENESIS	121	0.472709	1.4605	0.0376238	0.138892	1	3440	tags=43%, list=22%, signal=55%
GOBP_G_PROTEIN_COUPLED_RECEPTOR_SIGNALING_PATHWAY_COUPLED_TO_CYCLIC_NUCLEOTIDE_SECOND_MESSENGER	GOBP_G_PROTEIN_COUPLED_RECEPTOR_SIGNALING_PATHWAY_COUPLED_TO_CYCLIC_NUCLEOTIDE_SECOND_MESSENGER	56	0.507952	1.45957	0.0156863	0.139605	1	2089	tags=29%, list=14%, signal=33%
GOBP_POSITIVE_REGULATION_OF_HUMORAL_IMMUNE_RESPONSE	GOBP_POSITIVE_REGULATION_OF_HUMORAL_IMMUNE_RESPONSE	20	0.68337	1.45943	0.030426	0.139596	1	2249	tags=55%, list=15%, signal=64%
GOBP_CHONDROITIN_SULFATE_PROTEOGLYCAN_METABOLIC_PROCESS	GOBP_CHONDROITIN_SULFATE_PROTEOGLYCAN_METABOLIC_PROCESS	33	0.547706	1.45939	0.0525253	0.13951	1	3376	tags=42%, list=22%, signal=54%
GOBP_RESPONSE_TO_MUSCLE_STRETCH	GOBP_RESPONSE_TO_MUSCLE_STRETCH	24	0.564325	1.45886	0.0772277	0.139866	1	2843	tags=46%, list=19%, signal=56%
GOBP_REGULATION_OF_CANONICAL_WNT_SIGNALING_PATHWAY	GOBP_REGULATION_OF_CANONICAL_WNT_SIGNALING_PATHWAY	226	0.411892	1.45879	0.0394477	0.139811	1	4479	tags=39%, list=29%, signal=55%
GOBP_POSITIVE_REGULATION_OF_CELL_SUBSTRATE_JUNCTION_ORGANIZATION	GOBP_POSITIVE_REGULATION_OF_CELL_SUBSTRATE_JUNCTION_ORGANIZATION	31	0.484946	1.45872	0.0703125	0.139767	1	4725	tags=48%, list=31%, signal=70%
GOBP_LYMPHANGIOGENESIS	GOBP_LYMPHANGIOGENESIS	17	0.663135	1.45814	0.0737705	0.14016	1	3850	tags=65%, list=25%, signal=86%
GOBP_HEART_MORPHOGENESIS	GOBP_HEART_MORPHOGENESIS	238	0.442614	1.45801	0.0352941	0.140154	1	3851	tags=40%, list=25%, signal=52%
GOBP_MODULATION_OF_PROCESS_OF_ANOTHER_ORGANISM	GOBP_MODULATION_OF_PROCESS_OF_ANOTHER_ORGANISM	22	0.66501	1.45796	0.0400802	0.140086	1	3031	tags=55%, list=20%, signal=68%
GOBP_NECROTIC_CELL_DEATH	GOBP_NECROTIC_CELL_DEATH	53	0.400458	1.45742	0.0805085	0.140439	1	4525	tags=40%, list=29%, signal=56%
GOBP_NEGATIVE_REGULATION_OF_INTERLEUKIN_12_PRODUCTION	GOBP_NEGATIVE_REGULATION_OF_INTERLEUKIN_12_PRODUCTION	18	0.74472	1.45722	0.0762887	0.140485	1	2783	tags=78%, list=18%, signal=95%
GOBP_DEFENSE_RESPONSE_TO_BACTERIUM	GOBP_DEFENSE_RESPONSE_TO_BACTERIUM	230	0.496826	1.45642	0.0257426	0.141082	1	4135	tags=50%, list=27%, signal=67%
GOBP_REGULATION_OF_SMAD_PROTEIN_SIGNAL_TRANSDUCTION	GOBP_REGULATION_OF_SMAD_PROTEIN_SIGNAL_TRANSDUCTION	30	0.518853	1.45601	0.0438413	0.141318	1	3409	tags=43%, list=22%, signal=56%
GOBP_LIPID_TRANSLOCATION	GOBP_LIPID_TRANSLOCATION	49	0.488126	1.45569	0.0190275	0.14151	1	3013	tags=37%, list=20%, signal=46%
GOBP_POSITIVE_REGULATION_OF_ATP_METABOLIC_PROCESS	GOBP_POSITIVE_REGULATION_OF_ATP_METABOLIC_PROCESS	31	0.522777	1.45535	0.034413	0.141752	1	2517	tags=32%, list=16%, signal=39%
GOBP_MULTICELLULAR_ORGANISMAL_HOMEOSTASIS	GOBP_MULTICELLULAR_ORGANISMAL_HOMEOSTASIS	490	0.416162	1.45534	0.00407332	0.14164	1	3363	tags=31%, list=22%, signal=38%
GOBP_STEROID_CATABOLIC_PROCESS	GOBP_STEROID_CATABOLIC_PROCESS	26	0.54148	1.45528	0.0357853	0.141579	1	2518	tags=38%, list=16%, signal=46%
GOBP_MUSCLE_ORGAN_DEVELOPMENT	GOBP_MUSCLE_ORGAN_DEVELOPMENT	295	0.443076	1.45502	0.0194553	0.141701	1	3480	tags=34%, list=23%, signal=43%
GOBP_NEGATIVE_REGULATION_OF_CATABOLIC_PROCESS	GOBP_NEGATIVE_REGULATION_OF_CATABOLIC_PROCESS	278	0.293034	1.45485	0.0136719	0.141743	1	3442	tags=20%, list=22%, signal=25%
GOBP_GLIAL_CELL_PROLIFERATION	GOBP_GLIAL_CELL_PROLIFERATION	38	0.518763	1.45482	0.0484848	0.141645	1	2754	tags=39%, list=18%, signal=48%
GOBP_POSITIVE_REGULATION_OF_B_CELL_MEDIATED_IMMUNITY	GOBP_POSITIVE_REGULATION_OF_B_CELL_MEDIATED_IMMUNITY	32	0.61781	1.45443	0.0659794	0.141877	1	2849	tags=50%, list=19%, signal=61%
GOBP_NEGATIVE_REGULATION_OF_CALCIUM_ION_TRANSPORT	GOBP_NEGATIVE_REGULATION_OF_CALCIUM_ION_TRANSPORT	53	0.509667	1.45428	0.0301811	0.141889	1	3269	tags=36%, list=21%, signal=45%
GOBP_NEGATIVE_REGULATION_OF_POTASSIUM_ION_TRANSMEMBRANE_TRANSPORT	GOBP_NEGATIVE_REGULATION_OF_POTASSIUM_ION_TRANSMEMBRANE_TRANSPORT	21	0.636798	1.45427	0.0625	0.141773	1	2024	tags=38%, list=13%, signal=44%
GOBP_OVULATION_CYCLE	GOBP_OVULATION_CYCLE	69	0.520985	1.45413	0.0244898	0.141772	1	2603	tags=32%, list=17%, signal=38%
GOBP_REGULATION_OF_PROTEIN_DEACETYLATION	GOBP_REGULATION_OF_PROTEIN_DEACETYLATION	53	0.368081	1.45401	0.0652174	0.141768	1	2707	tags=23%, list=18%, signal=27%
GOBP_REGULATION_OF_FATTY_ACID_OXIDATION	GOBP_REGULATION_OF_FATTY_ACID_OXIDATION	30	0.520873	1.45345	0.0494071	0.142165	1	2417	tags=30%, list=16%, signal=36%
GOBP_DENDRITIC_SPINE_MAINTENANCE	GOBP_DENDRITIC_SPINE_MAINTENANCE	17	0.570126	1.4534	0.0562249	0.142076	1	2083	tags=35%, list=14%, signal=41%
GOBP_REGULATION_OF_ACTIN_FILAMENT_BASED_MOVEMENT	GOBP_REGULATION_OF_ACTIN_FILAMENT_BASED_MOVEMENT	39	0.521122	1.45286	0.0387755	0.142453	1	2394	tags=36%, list=16%, signal=42%
GOBP_NEGATIVE_REGULATION_OF_CALCIUM_ION_TRANSMEMBRANE_TRANSPORT	GOBP_NEGATIVE_REGULATION_OF_CALCIUM_ION_TRANSMEMBRANE_TRANSPORT	34	0.543615	1.45261	0.0588235	0.142585	1	1711	tags=24%, list=11%, signal=26%
GOBP_POSITIVE_REGULATION_OF_ION_TRANSPORT	GOBP_POSITIVE_REGULATION_OF_ION_TRANSPORT	242	0.462512	1.45258	0.00200401	0.142502	1	3427	tags=39%, list=22%, signal=49%
GOBP_ATP_TRANSPORT	GOBP_ATP_TRANSPORT	16	0.498742	1.45233	0.0767677	0.142598	1	4917	tags=50%, list=32%, signal=73%
GOBP_BIOMINERALIZATION	GOBP_BIOMINERALIZATION	152	0.473839	1.45218	0.0242915	0.142613	1	3602	tags=37%, list=23%, signal=48%
GOBP_NEGATIVE_REGULATION_OF_CYTOSKELETON_ORGANIZATION	GOBP_NEGATIVE_REGULATION_OF_CYTOSKELETON_ORGANIZATION	141	0.399232	1.45198	0.0410678	0.142682	1	3665	tags=36%, list=24%, signal=47%
GOBP_NEUROMUSCULAR_JUNCTION_DEVELOPMENT	GOBP_NEUROMUSCULAR_JUNCTION_DEVELOPMENT	42	0.488288	1.45191	0.0514851	0.142632	1	3370	tags=36%, list=22%, signal=46%
GOBP_NEGATIVE_REGULATION_OF_MUSCLE_CONTRACTION	GOBP_NEGATIVE_REGULATION_OF_MUSCLE_CONTRACTION	21	0.625736	1.45137	0.0425963	0.143031	1	2394	tags=52%, list=16%, signal=62%
GOBP_REGULATION_OF_BIOLOGICAL_PROCESS_INVOLVED_IN_SYMBIOTIC_INTERACTION	GOBP_REGULATION_OF_BIOLOGICAL_PROCESS_INVOLVED_IN_SYMBIOTIC_INTERACTION	51	0.515437	1.45137	0.0485232	0.142911	1	2730	tags=31%, list=18%, signal=38%
GOBP_ACUTE_INFLAMMATORY_RESPONSE	GOBP_ACUTE_INFLAMMATORY_RESPONSE	100	0.506366	1.45137	0.0311891	0.142802	1	2394	tags=35%, list=16%, signal=41%
GOBP_HUMORAL_IMMUNE_RESPONSE_MEDIATED_BY_CIRCULATING_IMMUNOGLOBULIN	GOBP_HUMORAL_IMMUNE_RESPONSE_MEDIATED_BY_CIRCULATING_IMMUNOGLOBULIN	45	0.600244	1.45106	0.0432099	0.142955	1	3252	tags=60%, list=21%, signal=76%
GOBP_INNATE_IMMUNE_RESPONSE_ACTIVATING_SIGNAL_TRANSDUCTION	GOBP_INNATE_IMMUNE_RESPONSE_ACTIVATING_SIGNAL_TRANSDUCTION	23	0.606588	1.45083	0.0785124	0.143092	1	2787	tags=43%, list=18%, signal=53%
GOBP_RECEPTOR_CATABOLIC_PROCESS	GOBP_RECEPTOR_CATABOLIC_PROCESS	26	0.454449	1.45027	0.0794979	0.143528	1	2966	tags=35%, list=19%, signal=43%
GOBP_REGULATION_OF_PHOSPHOLIPID_METABOLIC_PROCESS	GOBP_REGULATION_OF_PHOSPHOLIPID_METABOLIC_PROCESS	33	0.461376	1.45015	0.0537849	0.143498	1	5007	tags=55%, list=33%, signal=81%
GOBP_RENAL_SYSTEM_PROCESS_INVOLVED_IN_REGULATION_OF_SYSTEMIC_ARTERIAL_BLOOD_PRESSURE	GOBP_RENAL_SYSTEM_PROCESS_INVOLVED_IN_REGULATION_OF_SYSTEMIC_ARTERIAL_BLOOD_PRESSURE	25	0.638929	1.4495	0.0409357	0.144021	1	2457	tags=52%, list=16%, signal=62%
GOBP_STEROL_HOMEOSTASIS	GOBP_STEROL_HOMEOSTASIS	76	0.504409	1.44933	0.0561122	0.144073	1	3300	tags=42%, list=21%, signal=53%
GOBP_REGULATION_OF_SYSTEMIC_ARTERIAL_BLOOD_PRESSURE_BY_HORMONE	GOBP_REGULATION_OF_SYSTEMIC_ARTERIAL_BLOOD_PRESSURE_BY_HORMONE	37	0.617895	1.44923	0.037037	0.144068	1	3959	tags=54%, list=26%, signal=73%
GOBP_DNA_CATABOLIC_PROCESS	GOBP_DNA_CATABOLIC_PROCESS	29	0.464408	1.44871	0.0588235	0.144358	1	772	tags=10%, list=5%, signal=11%
GOBP_SEQUESTERING_OF_TRIGLYCERIDE	GOBP_SEQUESTERING_OF_TRIGLYCERIDE	17	0.611168	1.44857	0.0545455	0.144381	1	2064	tags=35%, list=13%, signal=41%
GOBP_NEGATIVE_REGULATION_OF_B_CELL_PROLIFERATION	GOBP_NEGATIVE_REGULATION_OF_B_CELL_PROLIFERATION	17	0.664944	1.44839	0.111336	0.14441	1	3737	tags=71%, list=24%, signal=93%
GOBP_POST_EMBRYONIC_DEVELOPMENT	GOBP_POST_EMBRYONIC_DEVELOPMENT	80	0.395138	1.44826	0.0331263	0.144419	1	3426	tags=28%, list=22%, signal=35%
GOBP_MUSCLE_CELL_APOPTOTIC_PROCESS	GOBP_MUSCLE_CELL_APOPTOTIC_PROCESS	64	0.445292	1.44718	0.016	0.145274	1	2585	tags=28%, list=17%, signal=34%
GOBP_REGULATION_OF_HEART_CONTRACTION	GOBP_REGULATION_OF_HEART_CONTRACTION	188	0.478156	1.44656	0.0204918	0.145715	1	3717	tags=40%, list=24%, signal=53%
GOBP_REGULATION_OF_PROTEIN_POLYUBIQUITINATION	GOBP_REGULATION_OF_PROTEIN_POLYUBIQUITINATION	26	0.415539	1.44651	0.0871287	0.145634	1	2717	tags=19%, list=18%, signal=23%
GOBP_RESPONSE_TO_COLD	GOBP_RESPONSE_TO_COLD	48	0.44182	1.44626	0.0297619	0.145743	1	3706	tags=33%, list=24%, signal=44%
GOBP_NEGATIVE_REGULATION_OF_ORGAN_GROWTH	GOBP_NEGATIVE_REGULATION_OF_ORGAN_GROWTH	29	0.505693	1.44622	0.072	0.14566	1	4187	tags=55%, list=27%, signal=76%
GOBP_POSITIVE_REGULATION_OF_MEMBRANE_PROTEIN_ECTODOMAIN_PROTEOLYSIS	GOBP_POSITIVE_REGULATION_OF_MEMBRANE_PROTEIN_ECTODOMAIN_PROTEOLYSIS	15	0.621484	1.44603	0.0533881	0.145718	1	3757	tags=60%, list=24%, signal=79%
GOBP_REGULATION_OF_DEFENSE_RESPONSE_TO_BACTERIUM	GOBP_REGULATION_OF_DEFENSE_RESPONSE_TO_BACTERIUM	18	0.606361	1.446	0.0669371	0.145617	1	4304	tags=78%, list=28%, signal=108%
GOBP_NEGATIVE_REGULATION_OF_SECRETION	GOBP_NEGATIVE_REGULATION_OF_SECRETION	143	0.452041	1.44543	0.0178571	0.146034	1	2927	tags=29%, list=19%, signal=35%
GOBP_ISOTYPE_SWITCHING_TO_IGG_ISOTYPES	GOBP_ISOTYPE_SWITCHING_TO_IGG_ISOTYPES	15	0.654195	1.44517	0.0967078	0.146168	1	1996	tags=47%, list=13%, signal=54%
GOBP_POSITIVE_REGULATION_OF_LIPID_BIOSYNTHETIC_PROCESS	GOBP_POSITIVE_REGULATION_OF_LIPID_BIOSYNTHETIC_PROCESS	75	0.448662	1.44516	0.0329897	0.146067	1	4016	tags=41%, list=26%, signal=56%
GOBP_BASE_CONVERSION_OR_SUBSTITUTION_EDITING	GOBP_BASE_CONVERSION_OR_SUBSTITUTION_EDITING	18	0.58275	1.44511	0.0558767	0.145978	1	4004	tags=44%, list=26%, signal=60%
GOBP_REGENERATION	GOBP_REGENERATION	166	0.413277	1.44496	0.0138067	0.145994	1	3399	tags=35%, list=22%, signal=44%
GOBP_HINDLIMB_MORPHOGENESIS	GOBP_HINDLIMB_MORPHOGENESIS	33	0.561614	1.4448	0.0348361	0.14601	1	3118	tags=39%, list=20%, signal=49%
GOBP_REGULATION_OF_OXIDATIVE_STRESS_INDUCED_INTRINSIC_APOPTOTIC_SIGNALING_PATHWAY	GOBP_REGULATION_OF_OXIDATIVE_STRESS_INDUCED_INTRINSIC_APOPTOTIC_SIGNALING_PATHWAY	27	0.42969	1.44479	0.106509	0.145896	1	2173	tags=15%, list=14%, signal=17%
GOBP_NEGATIVE_REGULATION_OF_CELLULAR_CATABOLIC_PROCESS	GOBP_NEGATIVE_REGULATION_OF_CELLULAR_CATABOLIC_PROCESS	225	0.280136	1.44393	0.015444	0.146555	1	3410	tags=19%, list=22%, signal=24%
GOBP_POSITIVE_REGULATION_OF_B_CELL_PROLIFERATION	GOBP_POSITIVE_REGULATION_OF_B_CELL_PROLIFERATION	41	0.560393	1.44388	0.10124	0.146479	1	2330	tags=37%, list=15%, signal=43%
GOBP_GANGLIOSIDE_METABOLIC_PROCESS	GOBP_GANGLIOSIDE_METABOLIC_PROCESS	25	0.525294	1.44367	0.0594059	0.146579	1	4682	tags=48%, list=30%, signal=69%
GOBP_POSITIVE_REGULATION_OF_RHO_PROTEIN_SIGNAL_TRANSDUCTION	GOBP_POSITIVE_REGULATION_OF_RHO_PROTEIN_SIGNAL_TRANSDUCTION	31	0.587946	1.44355	0.0589431	0.146559	1	3361	tags=58%, list=22%, signal=74%
GOBP_NEGATIVE_REGULATION_OF_CANONICAL_WNT_SIGNALING_PATHWAY	GOBP_NEGATIVE_REGULATION_OF_CANONICAL_WNT_SIGNALING_PATHWAY	123	0.452137	1.44342	0.0473373	0.146535	1	3912	tags=37%, list=25%, signal=50%
GOBP_REGULATION_OF_LIPID_LOCALIZATION	GOBP_REGULATION_OF_LIPID_LOCALIZATION	154	0.438164	1.4429	0.0242424	0.146868	1	3207	tags=33%, list=21%, signal=41%
GOBP_NEGATIVE_REGULATION_OF_SMOOTH_MUSCLE_CELL_MIGRATION	GOBP_NEGATIVE_REGULATION_OF_SMOOTH_MUSCLE_CELL_MIGRATION	23	0.556844	1.44288	0.0826772	0.146763	1	4534	tags=48%, list=30%, signal=68%
GOBP_ICOSANOID_BIOSYNTHETIC_PROCESS	GOBP_ICOSANOID_BIOSYNTHETIC_PROCESS	45	0.527734	1.44264	0.0451866	0.146872	1	3495	tags=47%, list=23%, signal=60%
GOBP_POSITIVE_REGULATION_OF_AMYLOID_PRECURSOR_PROTEIN_CATABOLIC_PROCESS	GOBP_POSITIVE_REGULATION_OF_AMYLOID_PRECURSOR_PROTEIN_CATABOLIC_PROCESS	20	0.512238	1.44184	0.0724638	0.147496	1	3951	tags=50%, list=26%, signal=67%
GOBP_PLATELET_AGGREGATION	GOBP_PLATELET_AGGREGATION	66	0.531969	1.44166	0.049896	0.147544	1	3111	tags=44%, list=20%, signal=55%
GOBP_RESPONSE_TO_INTERLEUKIN_1	GOBP_RESPONSE_TO_INTERLEUKIN_1	113	0.512154	1.44103	0.0657084	0.147998	1	3098	tags=41%, list=20%, signal=51%
GOBP_POSITIVE_REGULATION_OF_BINDING	GOBP_POSITIVE_REGULATION_OF_BINDING	161	0.37272	1.44058	0.0321285	0.148282	1	4324	tags=34%, list=28%, signal=46%
GOBP_MEMBRANE_DEPOLARIZATION	GOBP_MEMBRANE_DEPOLARIZATION	78	0.507103	1.44032	0.0342052	0.148403	1	2991	tags=37%, list=19%, signal=46%
GOBP_CELL_COMMUNICATION_INVOLVED_IN_CARDIAC_CONDUCTION	GOBP_CELL_COMMUNICATION_INVOLVED_IN_CARDIAC_CONDUCTION	53	0.546124	1.44031	0.0460922	0.148303	1	2387	tags=34%, list=16%, signal=40%
GOBP_POSITIVE_REGULATION_OF_ALCOHOL_BIOSYNTHETIC_PROCESS	GOBP_POSITIVE_REGULATION_OF_ALCOHOL_BIOSYNTHETIC_PROCESS	24	0.578725	1.44022	0.0291667	0.148295	1	1436	tags=29%, list=9%, signal=32%
GOBP_REGULATION_OF_POTASSIUM_ION_TRANSPORT	GOBP_REGULATION_OF_POTASSIUM_ION_TRANSPORT	95	0.505425	1.44017	0.0291262	0.148221	1	2938	tags=38%, list=19%, signal=47%
GOBP_REGULATION_OF_PLATELET_ACTIVATION	GOBP_REGULATION_OF_PLATELET_ACTIVATION	45	0.566534	1.44008	0.0561122	0.148198	1	3111	tags=51%, list=20%, signal=64%
GOBP_RIBONUCLEOSIDE_CATABOLIC_PROCESS	GOBP_RIBONUCLEOSIDE_CATABOLIC_PROCESS	17	0.630642	1.43996	0.0442656	0.148188	1	4004	tags=59%, list=26%, signal=79%
GOBP_POSITIVE_REGULATION_OF_PROTEIN_LOCALIZATION	GOBP_POSITIVE_REGULATION_OF_PROTEIN_LOCALIZATION	401	0.319349	1.43984	0.015873	0.148173	1	3798	tags=26%, list=25%, signal=34%
GOBP_POSITIVE_REGULATION_OF_NERVOUS_SYSTEM_PROCESS	GOBP_POSITIVE_REGULATION_OF_NERVOUS_SYSTEM_PROCESS	30	0.53695	1.43954	0.049904	0.148332	1	2132	tags=33%, list=14%, signal=39%
GOBP_RESPONSE_TO_CAMP	GOBP_RESPONSE_TO_CAMP	85	0.467842	1.43944	0.0323887	0.148313	1	2671	tags=35%, list=17%, signal=42%
GOBP_OLFACTORY_LOBE_DEVELOPMENT	GOBP_OLFACTORY_LOBE_DEVELOPMENT	33	0.534816	1.43926	0.032	0.148386	1	1146	tags=24%, list=7%, signal=26%
GOBP_T_HELPER_17_CELL_DIFFERENTIATION	GOBP_T_HELPER_17_CELL_DIFFERENTIATION	27	0.621508	1.43893	0.0756646	0.148576	1	3090	tags=52%, list=20%, signal=65%
GOBP_PURINE_CONTAINING_COMPOUND_TRANSMEMBRANE_TRANSPORT	GOBP_PURINE_CONTAINING_COMPOUND_TRANSMEMBRANE_TRANSPORT	25	0.507876	1.43886	0.0555556	0.148533	1	719	tags=12%, list=5%, signal=13%
GOBP_POSITIVE_REGULATION_OF_BLOOD_CIRCULATION	GOBP_POSITIVE_REGULATION_OF_BLOOD_CIRCULATION	36	0.56741	1.43836	0.0389344	0.14893	1	3676	tags=44%, list=24%, signal=58%
GOBP_MUSCLE_TISSUE_DEVELOPMENT	GOBP_MUSCLE_TISSUE_DEVELOPMENT	358	0.435222	1.43819	0.025	0.148968	1	3627	tags=36%, list=24%, signal=46%
GOBP_REGULATION_OF_EPITHELIAL_CELL_APOPTOTIC_PROCESS	GOBP_REGULATION_OF_EPITHELIAL_CELL_APOPTOTIC_PROCESS	78	0.496597	1.43816	0.0563674	0.148873	1	3189	tags=41%, list=21%, signal=52%
GOBP_REGULATION_OF_BONE_MINERALIZATION	GOBP_REGULATION_OF_BONE_MINERALIZATION	70	0.516515	1.43789	0.0445344	0.149003	1	3847	tags=47%, list=25%, signal=63%
GOBP_NEUROTRANSMITTER_REUPTAKE	GOBP_NEUROTRANSMITTER_REUPTAKE	34	0.563607	1.43716	0.0290135	0.149606	1	1783	tags=29%, list=12%, signal=33%
GOBP_NEGATIVE_REGULATION_OF_TRANSLATIONAL_INITIATION	GOBP_NEGATIVE_REGULATION_OF_TRANSLATIONAL_INITIATION	16	0.456844	1.43631	0.108911	0.150254	1	195	tags=6%, list=1%, signal=6%
GOBP_BLOOD_VESSEL_REMODELING	GOBP_BLOOD_VESSEL_REMODELING	41	0.478312	1.43624	0.0555556	0.150195	1	3409	tags=39%, list=22%, signal=50%
GOBP_BONE_MINERALIZATION	GOBP_BONE_MINERALIZATION	108	0.508574	1.43619	0.034413	0.150123	1	3602	tags=44%, list=23%, signal=58%
GOBP_COGNITION	GOBP_COGNITION	283	0.426378	1.43617	0.0156863	0.150023	1	3617	tags=31%, list=24%, signal=40%
GOBP_PULMONARY_VALVE_MORPHOGENESIS	GOBP_PULMONARY_VALVE_MORPHOGENESIS	17	0.625913	1.43615	0.0772358	0.149931	1	3832	tags=65%, list=25%, signal=86%
GOBP_VASCULAR_PROCESS_IN_CIRCULATORY_SYSTEM	GOBP_VASCULAR_PROCESS_IN_CIRCULATORY_SYSTEM	251	0.474692	1.43564	0.0199601	0.150254	1	2703	tags=31%, list=18%, signal=38%
GOBP_REGULATION_OF_FIBROBLAST_GROWTH_FACTOR_RECEPTOR_SIGNALING_PATHWAY	GOBP_REGULATION_OF_FIBROBLAST_GROWTH_FACTOR_RECEPTOR_SIGNALING_PATHWAY	30	0.566322	1.43556	0.055102	0.150208	1	3275	tags=37%, list=21%, signal=47%
GOBP_RESPONSE_TO_UV_B	GOBP_RESPONSE_TO_UV_B	16	0.618517	1.43551	0.0444444	0.150124	1	2712	tags=50%, list=18%, signal=61%
GOBP_ASTROCYTE_DIFFERENTIATION	GOBP_ASTROCYTE_DIFFERENTIATION	73	0.511887	1.4355	0.0271318	0.150012	1	3385	tags=41%, list=22%, signal=52%
GOBP_BONE_CELL_DEVELOPMENT	GOBP_BONE_CELL_DEVELOPMENT	34	0.511819	1.43534	0.0901639	0.150047	1	2604	tags=41%, list=17%, signal=49%
GOBP_REGULATION_OF_CARDIAC_CONDUCTION	GOBP_REGULATION_OF_CARDIAC_CONDUCTION	24	0.551683	1.43495	0.030303	0.150311	1	3676	tags=42%, list=24%, signal=55%
GOBP_EXOCYTOSIS	GOBP_EXOCYTOSIS	323	0.394998	1.43474	0.0180723	0.150401	1	3156	tags=28%, list=21%, signal=34%
GOBP_POSITIVE_REGULATION_OF_COLD_INDUCED_THERMOGENESIS	GOBP_POSITIVE_REGULATION_OF_COLD_INDUCED_THERMOGENESIS	96	0.452853	1.43457	0.0275049	0.150452	1	2018	tags=24%, list=13%, signal=27%
GOBP_PYROPTOSIS	GOBP_PYROPTOSIS	20	0.607424	1.43442	0.0733198	0.150501	1	2422	tags=45%, list=16%, signal=53%
GOBP_SOMATIC_DIVERSIFICATION_OF_IMMUNOGLOBULINS_INVOLVED_IN_IMMUNE_RESPONSE	GOBP_SOMATIC_DIVERSIFICATION_OF_IMMUNOGLOBULINS_INVOLVED_IN_IMMUNE_RESPONSE	44	0.505589	1.43372	0.107784	0.151074	1	2538	tags=30%, list=17%, signal=35%
GOBP_HETEROTYPIC_CELL_CELL_ADHESION	GOBP_HETEROTYPIC_CELL_CELL_ADHESION	59	0.546346	1.43371	0.0631365	0.150958	1	3535	tags=56%, list=23%, signal=72%
GOBP_REGULATION_OF_NUCLEOCYTOPLASMIC_TRANSPORT	GOBP_REGULATION_OF_NUCLEOCYTOPLASMIC_TRANSPORT	100	0.336728	1.43341	0.0502008	0.15111	1	3556	tags=26%, list=23%, signal=34%
GOBP_POSITIVE_REGULATION_OF_SMALL_MOLECULE_METABOLIC_PROCESS	GOBP_POSITIVE_REGULATION_OF_SMALL_MOLECULE_METABOLIC_PROCESS	127	0.436975	1.43261	0.0136986	0.151775	1	1546	tags=20%, list=10%, signal=22%
GOBP_RENAL_SYSTEM_PROCESS	GOBP_RENAL_SYSTEM_PROCESS	104	0.466618	1.43193	0.0379242	0.152328	1	3677	tags=40%, list=24%, signal=53%
GOBP_REGULATION_OF_TUBE_SIZE	GOBP_REGULATION_OF_TUBE_SIZE	132	0.500709	1.43137	0.0320641	0.152751	1	2703	tags=34%, list=18%, signal=41%
GOBP_REGULATION_OF_INTRACELLULAR_TRANSPORT	GOBP_REGULATION_OF_INTRACELLULAR_TRANSPORT	293	0.286181	1.43137	0.0258964	0.152632	1	3695	tags=22%, list=24%, signal=28%
GOBP_POSITIVE_REGULATION_OF_ESTABLISHMENT_OF_PROTEIN_LOCALIZATION	GOBP_POSITIVE_REGULATION_OF_ESTABLISHMENT_OF_PROTEIN_LOCALIZATION	278	0.321998	1.43069	0.0198413	0.153101	1	3842	tags=25%, list=25%, signal=33%
GOBP_PROTEIN_PROCESSING	GOBP_PROTEIN_PROCESSING	214	0.397086	1.43046	0.0321285	0.153171	1	2482	tags=21%, list=16%, signal=25%
GOBP_TRABECULA_MORPHOGENESIS	GOBP_TRABECULA_MORPHOGENESIS	45	0.496694	1.42999	0.064833	0.153487	1	2418	tags=29%, list=16%, signal=34%
GOBP_REGULATION_OF_RYANODINE_SENSITIVE_CALCIUM_RELEASE_CHANNEL_ACTIVITY	GOBP_REGULATION_OF_RYANODINE_SENSITIVE_CALCIUM_RELEASE_CHANNEL_ACTIVITY	22	0.613412	1.42976	0.0551181	0.153558	1	3556	tags=55%, list=23%, signal=71%
GOBP_NEGATIVE_REGULATION_OF_INTERLEUKIN_8_PRODUCTION	GOBP_NEGATIVE_REGULATION_OF_INTERLEUKIN_8_PRODUCTION	16	0.630924	1.42973	0.0708333	0.153466	1	1649	tags=44%, list=11%, signal=49%
GOBP_POST_GOLGI_VESICLE_MEDIATED_TRANSPORT	GOBP_POST_GOLGI_VESICLE_MEDIATED_TRANSPORT	97	0.283514	1.42965	0.0907258	0.153415	1	4989	tags=33%, list=32%, signal=49%
GOBP_DICARBOXYLIC_ACID_CATABOLIC_PROCESS	GOBP_DICARBOXYLIC_ACID_CATABOLIC_PROCESS	18	0.56276	1.42943	0.0752475	0.153534	1	1171	tags=17%, list=8%, signal=18%
GOBP_REGULATION_OF_LIPID_CATABOLIC_PROCESS	GOBP_REGULATION_OF_LIPID_CATABOLIC_PROCESS	56	0.470087	1.42918	0.0433925	0.153656	1	2417	tags=30%, list=16%, signal=36%
GOBP_STRIATED_MUSCLE_CELL_DEVELOPMENT	GOBP_STRIATED_MUSCLE_CELL_DEVELOPMENT	64	0.530348	1.429	0.0560928	0.15373	1	3422	tags=41%, list=22%, signal=52%
GOBP_BIOLOGICAL_PROCESS_INVOLVED_IN_INTERACTION_WITH_SYMBIONT	GOBP_BIOLOGICAL_PROCESS_INVOLVED_IN_INTERACTION_WITH_SYMBIONT	89	0.427715	1.42837	0.0306748	0.154228	1	3171	tags=27%, list=21%, signal=34%
GOBP_NATURAL_KILLER_CELL_MEDIATED_IMMUNITY	GOBP_NATURAL_KILLER_CELL_MEDIATED_IMMUNITY	62	0.604419	1.42824	0.100209	0.154246	1	4029	tags=60%, list=26%, signal=81%
GOBP_CELLULAR_RESPONSE_TO_INTERLEUKIN_1	GOBP_CELLULAR_RESPONSE_TO_INTERLEUKIN_1	90	0.52626	1.42774	0.0769231	0.154599	1	3098	tags=43%, list=20%, signal=54%
GOBP_POSITIVE_REGULATION_OF_LIPID_LOCALIZATION	GOBP_POSITIVE_REGULATION_OF_LIPID_LOCALIZATION	104	0.461944	1.42758	0.0340681	0.154623	1	3420	tags=39%, list=22%, signal=50%
GOBP_CELL_DEATH_IN_RESPONSE_TO_OXIDATIVE_STRESS	GOBP_CELL_DEATH_IN_RESPONSE_TO_OXIDATIVE_STRESS	80	0.39178	1.42702	0.0378151	0.155027	1	3133	tags=26%, list=20%, signal=33%
GOBP_POSITIVE_REGULATION_OF_LAMELLIPODIUM_ORGANIZATION	GOBP_POSITIVE_REGULATION_OF_LAMELLIPODIUM_ORGANIZATION	33	0.424962	1.42698	0.0686869	0.154939	1	4777	tags=42%, list=31%, signal=61%
GOBP_GLYCEROLIPID_METABOLIC_PROCESS	GOBP_GLYCEROLIPID_METABOLIC_PROCESS	351	0.352659	1.42695	0.0350877	0.154863	1	3540	tags=28%, list=23%, signal=35%
GOBP_RENAL_SYSTEM_PROCESS_INVOLVED_IN_REGULATION_OF_BLOOD_VOLUME	GOBP_RENAL_SYSTEM_PROCESS_INVOLVED_IN_REGULATION_OF_BLOOD_VOLUME	15	0.640173	1.42659	0.0817121	0.155093	1	3845	tags=73%, list=25%, signal=98%
GOBP_REGULATION_OF_CELLULAR_CARBOHYDRATE_METABOLIC_PROCESS	GOBP_REGULATION_OF_CELLULAR_CARBOHYDRATE_METABOLIC_PROCESS	130	0.372146	1.42657	0.0281125	0.154988	1	3785	tags=26%, list=25%, signal=34%
GOBP_POSITIVE_REGULATION_OF_T_HELPER_1_TYPE_IMMUNE_RESPONSE	GOBP_POSITIVE_REGULATION_OF_T_HELPER_1_TYPE_IMMUNE_RESPONSE	18	0.6847	1.42633	0.07	0.155079	1	1916	tags=61%, list=12%, signal=70%
GOBP_RESPONSE_TO_HYDROGEN_PEROXIDE	GOBP_RESPONSE_TO_HYDROGEN_PEROXIDE	108	0.391819	1.42556	0.0701031	0.155627	1	2716	tags=25%, list=18%, signal=30%
GOBP_NEGATIVE_CHEMOTAXIS	GOBP_NEGATIVE_CHEMOTAXIS	47	0.559297	1.42533	0.0607287	0.155757	1	3349	tags=45%, list=22%, signal=57%
GOBP_SMOOTH_MUSCLE_CELL_APOPTOTIC_PROCESS	GOBP_SMOOTH_MUSCLE_CELL_APOPTOTIC_PROCESS	21	0.582815	1.42525	0.0524272	0.155717	1	2585	tags=38%, list=17%, signal=46%
GOBP_NEPHRON_TUBULE_FORMATION	GOBP_NEPHRON_TUBULE_FORMATION	18	0.600593	1.425	0.0476191	0.15584	1	938	tags=22%, list=6%, signal=24%
GOBP_MONOCYTE_CHEMOTAXIS	GOBP_MONOCYTE_CHEMOTAXIS	53	0.630792	1.42444	0.0946502	0.156273	1	2998	tags=62%, list=20%, signal=77%
GOBP_REGULATION_OF_TOLERANCE_INDUCTION	GOBP_REGULATION_OF_TOLERANCE_INDUCTION	19	0.672274	1.42436	0.0866808	0.156231	1	3459	tags=74%, list=23%, signal=95%
GOBP_GLYCEROPHOSPHOLIPID_CATABOLIC_PROCESS	GOBP_GLYCEROPHOSPHOLIPID_CATABOLIC_PROCESS	30	0.519533	1.42435	0.0674603	0.156134	1	3438	tags=47%, list=22%, signal=60%
GOBP_PHOSPHATIDYLCHOLINE_CATABOLIC_PROCESS	GOBP_PHOSPHATIDYLCHOLINE_CATABOLIC_PROCESS	15	0.600259	1.42372	0.0925553	0.156597	1	3091	tags=60%, list=20%, signal=75%
GOBP_MAINTENANCE_OF_PROTEIN_LOCATION	GOBP_MAINTENANCE_OF_PROTEIN_LOCATION	88	0.333813	1.42346	0.0512821	0.156711	1	4825	tags=34%, list=31%, signal=49%
GOBP_POSITIVE_REGULATION_OF_OSTEOBLAST_DIFFERENTIATION	GOBP_POSITIVE_REGULATION_OF_OSTEOBLAST_DIFFERENTIATION	59	0.508767	1.42343	0.0514403	0.156624	1	3596	tags=41%, list=23%, signal=53%
GOBP_REGULATION_OF_FATTY_ACID_METABOLIC_PROCESS	GOBP_REGULATION_OF_FATTY_ACID_METABOLIC_PROCESS	80	0.417052	1.42333	0.0490196	0.156602	1	3259	tags=28%, list=21%, signal=35%
GOBP_MACROAUTOPHAGY	GOBP_MACROAUTOPHAGY	279	0.223326	1.42302	0.0604288	0.156784	1	5373	tags=27%, list=35%, signal=41%
GOBP_MACROPHAGE_DIFFERENTIATION	GOBP_MACROPHAGE_DIFFERENTIATION	44	0.511508	1.42293	0.082	0.156747	1	4368	tags=61%, list=28%, signal=86%
GOBP_REGULATION_OF_OXIDATIVE_STRESS_INDUCED_CELL_DEATH	GOBP_REGULATION_OF_OXIDATIVE_STRESS_INDUCED_CELL_DEATH	62	0.414991	1.4225	0.053719	0.157017	1	1756	tags=18%, list=11%, signal=20%
GOBP_REGULATION_OF_PH	GOBP_REGULATION_OF_PH	83	0.411335	1.42229	0.0117417	0.157101	1	3629	tags=35%, list=24%, signal=46%
GOBP_HEART_FORMATION	GOBP_HEART_FORMATION	30	0.569107	1.42205	0.0515873	0.157201	1	3471	tags=47%, list=23%, signal=60%
GOBP_SPHINGOLIPID_MEDIATED_SIGNALING_PATHWAY	GOBP_SPHINGOLIPID_MEDIATED_SIGNALING_PATHWAY	16	0.588125	1.42164	0.057971	0.157477	1	2749	tags=31%, list=18%, signal=38%
GOBP_REGULATION_OF_RUFFLE_ASSEMBLY	GOBP_REGULATION_OF_RUFFLE_ASSEMBLY	29	0.480612	1.42133	0.074	0.157658	1	4236	tags=48%, list=28%, signal=67%
GOBP_PHOSPHOLIPID_CATABOLIC_PROCESS	GOBP_PHOSPHOLIPID_CATABOLIC_PROCESS	48	0.47224	1.42133	0.0544355	0.15754	1	3441	tags=44%, list=22%, signal=56%
GOBP_MORPHOGENESIS_OF_AN_EPITHELIAL_BUD	GOBP_MORPHOGENESIS_OF_AN_EPITHELIAL_BUD	15	0.66357	1.42055	0.0549898	0.158144	1	3136	tags=60%, list=20%, signal=75%
GOBP_REGULATION_OF_BLOOD_CIRCULATION	GOBP_REGULATION_OF_BLOOD_CIRCULATION	234	0.471941	1.42052	0.034413	0.158053	1	3717	tags=40%, list=24%, signal=52%
GOBP_SIGNALING_RECEPTOR_LIGAND_PRECURSOR_PROCESSING	GOBP_SIGNALING_RECEPTOR_LIGAND_PRECURSOR_PROCESSING	33	0.568437	1.4205	0.0513834	0.157945	1	2211	tags=36%, list=14%, signal=42%
GOBP_REGULATION_OF_REGULATED_SECRETORY_PATHWAY	GOBP_REGULATION_OF_REGULATED_SECRETORY_PATHWAY	128	0.444059	1.42029	0.00817996	0.15802	1	3737	tags=39%, list=24%, signal=51%
GOBP_VENOUS_BLOOD_VESSEL_DEVELOPMENT	GOBP_VENOUS_BLOOD_VESSEL_DEVELOPMENT	16	0.61006	1.41947	0.107216	0.158723	1	3409	tags=56%, list=22%, signal=72%
GOBP_POSITIVE_REGULATION_OF_NEURON_DEATH	GOBP_POSITIVE_REGULATION_OF_NEURON_DEATH	80	0.403693	1.41919	0.0638723	0.158876	1	3538	tags=36%, list=23%, signal=47%
GOBP_REGULATION_OF_HEART_RATE	GOBP_REGULATION_OF_HEART_RATE	95	0.496681	1.4189	0.0387755	0.159041	1	3664	tags=41%, list=24%, signal=54%
GOBP_ANIMAL_ORGAN_REGENERATION	GOBP_ANIMAL_ORGAN_REGENERATION	64	0.485065	1.41888	0.0297872	0.158933	1	2688	tags=36%, list=18%, signal=43%
GOBP_ADAPTIVE_THERMOGENESIS	GOBP_ADAPTIVE_THERMOGENESIS	155	0.411521	1.41855	0.0264766	0.159155	1	3318	tags=28%, list=22%, signal=36%
GOBP_CELLULAR_RESPONSE_TO_ATP	GOBP_CELLULAR_RESPONSE_TO_ATP	16	0.588134	1.41835	0.0873984	0.159241	1	2355	tags=31%, list=15%, signal=37%
GOBP_POSITIVE_REGULATION_OF_HISTONE_DEACETYLATION	GOBP_POSITIVE_REGULATION_OF_HISTONE_DEACETYLATION	22	0.425841	1.41818	0.0975104	0.15926	1	2707	tags=18%, list=18%, signal=22%
GOBP_ADENYLATE_CYCLASE_ACTIVATING_G_PROTEIN_COUPLED_RECEPTOR_SIGNALING_PATHWAY	GOBP_ADENYLATE_CYCLASE_ACTIVATING_G_PROTEIN_COUPLED_RECEPTOR_SIGNALING_PATHWAY	125	0.457424	1.41763	0.00963391	0.159702	1	3655	tags=38%, list=24%, signal=50%
GOBP_NEGATIVE_REGULATION_OF_SIGNAL_TRANSDUCTION_IN_ABSENCE_OF_LIGAND	GOBP_NEGATIVE_REGULATION_OF_SIGNAL_TRANSDUCTION_IN_ABSENCE_OF_LIGAND	31	0.572762	1.41744	0.0731707	0.159785	1	1875	tags=26%, list=12%, signal=29%
GOBP_REGULATION_OF_WNT_SIGNALING_PATHWAY_PLANAR_CELL_POLARITY_PATHWAY	GOBP_REGULATION_OF_WNT_SIGNALING_PATHWAY_PLANAR_CELL_POLARITY_PATHWAY	16	0.641751	1.4174	0.0591837	0.159697	1	4378	tags=63%, list=29%, signal=87%
GOBP_NEURON_PROJECTION_EXTENSION	GOBP_NEURON_PROJECTION_EXTENSION	161	0.40722	1.41708	0.0376238	0.159893	1	3680	tags=34%, list=24%, signal=44%
GOBP_NEGATIVE_REGULATION_OF_MUSCLE_HYPERTROPHY	GOBP_NEGATIVE_REGULATION_OF_MUSCLE_HYPERTROPHY	28	0.490382	1.41703	0.085389	0.159814	1	3627	tags=36%, list=24%, signal=47%
GOBP_REGULATION_OF_NATURAL_KILLER_CELL_MEDIATED_IMMUNITY	GOBP_REGULATION_OF_NATURAL_KILLER_CELL_MEDIATED_IMMUNITY	39	0.670631	1.41639	0.092437	0.160352	1	2849	tags=59%, list=19%, signal=72%
GOBP_GLYCOPROTEIN_CATABOLIC_PROCESS	GOBP_GLYCOPROTEIN_CATABOLIC_PROCESS	23	0.522362	1.41611	0.0875764	0.160503	1	5253	tags=61%, list=34%, signal=92%
GOBP_CELL_DIFFERENTIATION_INVOLVED_IN_KIDNEY_DEVELOPMENT	GOBP_CELL_DIFFERENTIATION_INVOLVED_IN_KIDNEY_DEVELOPMENT	55	0.488509	1.41591	0.0478088	0.160569	1	3419	tags=36%, list=22%, signal=47%
GOBP_EXPLORATION_BEHAVIOR	GOBP_EXPLORATION_BEHAVIOR	24	0.604238	1.41571	0.0506073	0.160613	1	2132	tags=38%, list=14%, signal=43%
GOBP_FIBROBLAST_MIGRATION	GOBP_FIBROBLAST_MIGRATION	42	0.428821	1.4154	0.1174	0.160776	1	5763	tags=57%, list=38%, signal=91%
GOBP_OSSIFICATION	GOBP_OSSIFICATION	370	0.438284	1.41504	0.0550098	0.16097	1	3912	tags=39%, list=25%, signal=51%
GOBP_SKELETAL_MUSCLE_ADAPTATION	GOBP_SKELETAL_MUSCLE_ADAPTATION	21	0.604049	1.41486	0.0744275	0.161006	1	1007	tags=24%, list=7%, signal=25%
GOBP_DEFENSE_RESPONSE_TO_FUNGUS	GOBP_DEFENSE_RESPONSE_TO_FUNGUS	46	0.580107	1.41439	0.0612245	0.161337	1	2686	tags=41%, list=17%, signal=50%
GOBP_REGULATION_OF_RESPONSE_TO_WOUNDING	GOBP_REGULATION_OF_RESPONSE_TO_WOUNDING	149	0.466863	1.41429	0.0515873	0.161311	1	3148	tags=39%, list=20%, signal=48%
GOBP_POSITIVE_REGULATION_OF_PROTEASOMAL_UBIQUITIN_DEPENDENT_PROTEIN_CATABOLIC_PROCESS	GOBP_POSITIVE_REGULATION_OF_PROTEASOMAL_UBIQUITIN_DEPENDENT_PROTEIN_CATABOLIC_PROCESS	83	0.299793	1.41428	0.0685484	0.161198	1	2005	tags=13%, list=13%, signal=15%
GOBP_CHEMOKINE_C_X_C_MOTIF_LIGAND_2_PRODUCTION	GOBP_CHEMOKINE_C_X_C_MOTIF_LIGAND_2_PRODUCTION	16	0.587212	1.41426	0.0752033	0.161099	1	4073	tags=56%, list=27%, signal=76%
GOBP_REGULATION_OF_EXTRINSIC_APOPTOTIC_SIGNALING_PATHWAY	GOBP_REGULATION_OF_EXTRINSIC_APOPTOTIC_SIGNALING_PATHWAY	143	0.410971	1.41413	0.0730223	0.161119	1	1992	tags=20%, list=13%, signal=23%
GOBP_NEGATIVE_REGULATION_OF_VIRAL_GENOME_REPLICATION	GOBP_NEGATIVE_REGULATION_OF_VIRAL_GENOME_REPLICATION	49	0.500537	1.41374	0.134298	0.161391	1	4140	tags=47%, list=27%, signal=64%
GOBP_CATECHOL_CONTAINING_COMPOUND_METABOLIC_PROCESS	GOBP_CATECHOL_CONTAINING_COMPOUND_METABOLIC_PROCESS	51	0.515728	1.41317	0.0283401	0.161792	1	3129	tags=41%, list=20%, signal=52%
GOBP_FLUID_TRANSPORT	GOBP_FLUID_TRANSPORT	32	0.578808	1.41296	0.0616016	0.161857	1	3287	tags=44%, list=21%, signal=56%
GOBP_LIPID_LOCALIZATION	GOBP_LIPID_LOCALIZATION	403	0.395654	1.41226	0.0277228	0.162431	1	3320	tags=30%, list=22%, signal=37%
GOBP_POSITIVE_REGULATION_OF_TRIGLYCERIDE_METABOLIC_PROCESS	GOBP_POSITIVE_REGULATION_OF_TRIGLYCERIDE_METABOLIC_PROCESS	21	0.569176	1.41193	0.104839	0.162623	1	2064	tags=33%, list=13%, signal=38%
GOBP_COPULATION	GOBP_COPULATION	22	0.619331	1.41176	0.0486891	0.162711	1	910	tags=32%, list=6%, signal=34%
GOBP_NEGATIVE_REGULATION_OF_PROTEIN_CONTAINING_COMPLEX_DISASSEMBLY	GOBP_NEGATIVE_REGULATION_OF_PROTEIN_CONTAINING_COMPLEX_DISASSEMBLY	71	0.41434	1.4115	0.0714286	0.162828	1	3665	tags=39%, list=24%, signal=52%
GOBP_REGULATION_OF_OSTEOBLAST_DIFFERENTIATION	GOBP_REGULATION_OF_OSTEOBLAST_DIFFERENTIATION	112	0.49093	1.41131	0.0501002	0.162875	1	4037	tags=44%, list=26%, signal=59%
GOBP_NEUROMUSCULAR_SYNAPTIC_TRANSMISSION	GOBP_NEUROMUSCULAR_SYNAPTIC_TRANSMISSION	24	0.538781	1.41129	0.0613861	0.162772	1	3274	tags=46%, list=21%, signal=58%
GOBP_CELL_GROWTH	GOBP_CELL_GROWTH	437	0.3593	1.41118	0.030303	0.162748	1	4545	tags=36%, list=30%, signal=50%
GOBP_REGULATION_OF_RECEPTOR_RECYCLING	GOBP_REGULATION_OF_RECEPTOR_RECYCLING	20	0.518718	1.41108	0.072549	0.16272	1	1646	tags=20%, list=11%, signal=22%
GOBP_GLIAL_CELL_DEVELOPMENT	GOBP_GLIAL_CELL_DEVELOPMENT	102	0.468335	1.41079	0.0419162	0.162861	1	3977	tags=40%, list=26%, signal=54%
GOBP_ERYTHROCYTE_DEVELOPMENT	GOBP_ERYTHROCYTE_DEVELOPMENT	33	0.438344	1.4106	0.0977131	0.162908	1	4368	tags=36%, list=28%, signal=51%
GOBP_PROTEIN_LIPID_COMPLEX_SUBUNIT_ORGANIZATION	GOBP_PROTEIN_LIPID_COMPLEX_SUBUNIT_ORGANIZATION	48	0.51862	1.41059	0.0667976	0.162791	1	4501	tags=56%, list=29%, signal=79%
GOBP_NEGATIVE_REGULATION_OF_SMALL_MOLECULE_METABOLIC_PROCESS	GOBP_NEGATIVE_REGULATION_OF_SMALL_MOLECULE_METABOLIC_PROCESS	83	0.40626	1.4102	0.0160966	0.163067	1	3882	tags=30%, list=25%, signal=40%
GOBP_RESPONSE_TO_OSMOTIC_STRESS	GOBP_RESPONSE_TO_OSMOTIC_STRESS	78	0.399874	1.40934	0.0473373	0.163729	1	4375	tags=41%, list=28%, signal=57%
GOBP_REGULATION_OF_GENE_SILENCING_BY_RNA	GOBP_REGULATION_OF_GENE_SILENCING_BY_RNA	45	0.43941	1.40907	0.0589431	0.163881	1	2675	tags=24%, list=17%, signal=30%
GOBP_REGULATION_OF_HOMOTYPIC_CELL_CELL_ADHESION	GOBP_REGULATION_OF_HOMOTYPIC_CELL_CELL_ADHESION	32	0.563165	1.40889	0.0783133	0.163922	1	3251	tags=50%, list=21%, signal=63%
GOBP_NEGATIVE_REGULATION_OF_FIBROBLAST_GROWTH_FACTOR_RECEPTOR_SIGNALING_PATHWAY	GOBP_NEGATIVE_REGULATION_OF_FIBROBLAST_GROWTH_FACTOR_RECEPTOR_SIGNALING_PATHWAY	18	0.613977	1.40818	0.0617284	0.164509	1	3275	tags=44%, list=21%, signal=56%
GOBP_REGULATION_OF_CARBOHYDRATE_BIOSYNTHETIC_PROCESS	GOBP_REGULATION_OF_CARBOHYDRATE_BIOSYNTHETIC_PROCESS	86	0.402557	1.40802	0.0434783	0.164538	1	2925	tags=24%, list=19%, signal=30%
GOBP_POSITIVE_REGULATION_OF_NITRIC_OXIDE_SYNTHASE_ACTIVITY	GOBP_POSITIVE_REGULATION_OF_NITRIC_OXIDE_SYNTHASE_ACTIVITY	20	0.51646	1.40797	0.0702128	0.164472	1	2703	tags=35%, list=18%, signal=42%
GOBP_REGULATION_OF_BINDING	GOBP_REGULATION_OF_BINDING	341	0.342978	1.40794	0.027668	0.16438	1	3665	tags=26%, list=24%, signal=34%
GOBP_SKELETAL_MUSCLE_ORGAN_DEVELOPMENT	GOBP_SKELETAL_MUSCLE_ORGAN_DEVELOPMENT	147	0.44486	1.40767	0.0385356	0.164506	1	3229	tags=33%, list=21%, signal=41%
GOBP_NEGATIVE_REGULATION_OF_SMOOTH_MUSCLE_CELL_DIFFERENTIATION	GOBP_NEGATIVE_REGULATION_OF_SMOOTH_MUSCLE_CELL_DIFFERENTIATION	16	0.557393	1.40762	0.0967078	0.164439	1	5498	tags=69%, list=36%, signal=107%
GOBP_LONG_TERM_SYNAPTIC_POTENTIATION	GOBP_LONG_TERM_SYNAPTIC_POTENTIATION	79	0.498895	1.40757	0.0352251	0.164352	1	3002	tags=34%, list=20%, signal=42%
GOBP_NEGATIVE_REGULATION_OF_NEURAL_PRECURSOR_CELL_PROLIFERATION	GOBP_NEGATIVE_REGULATION_OF_NEURAL_PRECURSOR_CELL_PROLIFERATION	19	0.547201	1.40744	0.102515	0.164347	1	2953	tags=37%, list=19%, signal=46%
GOBP_ADENYLATE_CYCLASE_MODULATING_G_PROTEIN_COUPLED_RECEPTOR_SIGNALING_PATHWAY	GOBP_ADENYLATE_CYCLASE_MODULATING_G_PROTEIN_COUPLED_RECEPTOR_SIGNALING_PATHWAY	211	0.448054	1.40729	0.0078125	0.164364	1	2946	tags=32%, list=19%, signal=39%
GOBP_REGULATION_OF_SYNAPSE_ASSEMBLY	GOBP_REGULATION_OF_SYNAPSE_ASSEMBLY	92	0.511115	1.40674	0.0570342	0.164787	1	3416	tags=35%, list=22%, signal=44%
GOBP_PROTEIN_TARGETING_TO_MEMBRANE	GOBP_PROTEIN_TARGETING_TO_MEMBRANE	103	0.309003	1.40666	0.0692464	0.164741	1	3024	tags=17%, list=20%, signal=20%
GOBP_POSITIVE_REGULATION_OF_MUSCLE_CELL_APOPTOTIC_PROCESS	GOBP_POSITIVE_REGULATION_OF_MUSCLE_CELL_APOPTOTIC_PROCESS	23	0.536057	1.40642	0.0635838	0.164857	1	2585	tags=30%, list=17%, signal=37%
GOBP_POSITIVE_REGULATION_OF_MYELOID_LEUKOCYTE_DIFFERENTIATION	GOBP_POSITIVE_REGULATION_OF_MYELOID_LEUKOCYTE_DIFFERENTIATION	50	0.490136	1.40526	0.0721443	0.165883	1	4372	tags=62%, list=28%, signal=86%
GOBP_REGULATION_OF_LIPID_TRANSPORT	GOBP_REGULATION_OF_LIPID_TRANSPORT	127	0.43083	1.40518	0.032	0.165853	1	3207	tags=33%, list=21%, signal=41%
GOBP_POSITIVE_REGULATION_OF_ACUTE_INFLAMMATORY_RESPONSE	GOBP_POSITIVE_REGULATION_OF_ACUTE_INFLAMMATORY_RESPONSE	24	0.63559	1.40502	0.0914634	0.16585	1	2355	tags=54%, list=15%, signal=64%
GOBP_POSITIVE_REGULATION_OF_GLYCOPROTEIN_METABOLIC_PROCESS	GOBP_POSITIVE_REGULATION_OF_GLYCOPROTEIN_METABOLIC_PROCESS	20	0.573428	1.40497	0.116959	0.165758	1	1346	tags=25%, list=9%, signal=27%
GOBP_SKELETAL_MUSCLE_CELL_DIFFERENTIATION	GOBP_SKELETAL_MUSCLE_CELL_DIFFERENTIATION	58	0.475501	1.40418	0.0575139	0.166448	1	2172	tags=26%, list=14%, signal=30%
GOBP_NEGATIVE_REGULATION_OF_GROWTH	GOBP_NEGATIVE_REGULATION_OF_GROWTH	221	0.408873	1.40418	0.0368098	0.166332	1	3717	tags=37%, list=24%, signal=48%
GOBP_AMINOGLYCAN_BIOSYNTHETIC_PROCESS	GOBP_AMINOGLYCAN_BIOSYNTHETIC_PROCESS	77	0.447976	1.40354	0.0597938	0.16686	1	3610	tags=40%, list=24%, signal=52%
GOBP_POSITIVE_REGULATION_OF_MAST_CELL_ACTIVATION_INVOLVED_IN_IMMUNE_RESPONSE	GOBP_POSITIVE_REGULATION_OF_MAST_CELL_ACTIVATION_INVOLVED_IN_IMMUNE_RESPONSE	15	0.577878	1.40345	0.0865979	0.166827	1	5983	tags=80%, list=39%, signal=131%
GOBP_REGULATION_OF_MEMBRANE_LIPID_DISTRIBUTION	GOBP_REGULATION_OF_MEMBRANE_LIPID_DISTRIBUTION	55	0.448364	1.40332	0.0364807	0.166844	1	3013	tags=33%, list=20%, signal=41%
GOBP_CELLULAR_RESPONSE_TO_THYROID_HORMONE_STIMULUS	GOBP_CELLULAR_RESPONSE_TO_THYROID_HORMONE_STIMULUS	16	0.513014	1.40284	0.0900196	0.167239	1	2658	tags=38%, list=17%, signal=45%
GOBP_POSITIVE_REGULATION_OF_TYPE_2_IMMUNE_RESPONSE	GOBP_POSITIVE_REGULATION_OF_TYPE_2_IMMUNE_RESPONSE	17	0.665059	1.40264	0.112474	0.16729	1	3486	tags=65%, list=23%, signal=84%
GOBP_POSITIVE_REGULATION_OF_STRESS_FIBER_ASSEMBLY	GOBP_POSITIVE_REGULATION_OF_STRESS_FIBER_ASSEMBLY	48	0.434258	1.40253	0.0800821	0.167282	1	4767	tags=40%, list=31%, signal=57%
GOBP_PROTEIN_MATURATION	GOBP_PROTEIN_MATURATION	275	0.354797	1.40248	0.0423387	0.167202	1	2482	tags=19%, list=16%, signal=22%
GOBP_NEGATIVE_REGULATION_OF_MAPK_CASCADE	GOBP_NEGATIVE_REGULATION_OF_MAPK_CASCADE	158	0.391128	1.40182	0.0316456	0.167746	1	4729	tags=45%, list=31%, signal=64%
GOBP_NEGATIVE_REGULATION_OF_B_CELL_ACTIVATION	GOBP_NEGATIVE_REGULATION_OF_B_CELL_ACTIVATION	34	0.571219	1.40178	0.121951	0.167673	1	3282	tags=62%, list=21%, signal=78%
GOBP_CANONICAL_WNT_SIGNALING_PATHWAY	GOBP_CANONICAL_WNT_SIGNALING_PATHWAY	276	0.394041	1.40157	0.0562249	0.167751	1	4479	tags=38%, list=29%, signal=53%
GOBP_ANTIVIRAL_INNATE_IMMUNE_RESPONSE	GOBP_ANTIVIRAL_INNATE_IMMUNE_RESPONSE	16	0.549302	1.40119	0.137295	0.168023	1	3900	tags=56%, list=25%, signal=75%
GOBP_REGULATION_OF_CATECHOLAMINE_METABOLIC_PROCESS	GOBP_REGULATION_OF_CATECHOLAMINE_METABOLIC_PROCESS	19	0.559873	1.40095	0.0570265	0.168141	1	2132	tags=32%, list=14%, signal=37%
GOBP_SEMAPHORIN_PLEXIN_SIGNALING_PATHWAY	GOBP_SEMAPHORIN_PLEXIN_SIGNALING_PATHWAY	43	0.518888	1.40082	0.0813008	0.168131	1	4275	tags=53%, list=28%, signal=74%
GOBP_CARDIOCYTE_DIFFERENTIATION	GOBP_CARDIOCYTE_DIFFERENTIATION	129	0.447	1.4008	0.0484496	0.168026	1	3627	tags=39%, list=24%, signal=50%
GOBP_PLASMA_MEMBRANE_ORGANIZATION	GOBP_PLASMA_MEMBRANE_ORGANIZATION	133	0.371983	1.40017	0.0327869	0.168533	1	3554	tags=31%, list=23%, signal=40%
GOBP_PLASMA_LIPOPROTEIN_PARTICLE_CLEARANCE	GOBP_PLASMA_LIPOPROTEIN_PARTICLE_CLEARANCE	39	0.531301	1.39993	0.0746562	0.168636	1	4260	tags=51%, list=28%, signal=71%
GOBP_RESPONSE_TO_PROSTAGLANDIN	GOBP_RESPONSE_TO_PROSTAGLANDIN	30	0.600605	1.39958	0.0712831	0.168857	1	1356	tags=30%, list=9%, signal=33%
GOBP_REGULATION_OF_ENDOCYTIC_RECYCLING	GOBP_REGULATION_OF_ENDOCYTIC_RECYCLING	15	0.584928	1.39943	0.102767	0.168876	1	5939	tags=73%, list=39%, signal=119%
GOBP_STEM_CELL_DIVISION	GOBP_STEM_CELL_DIVISION	27	0.495928	1.39938	0.0828157	0.16881	1	3118	tags=30%, list=20%, signal=37%
GOBP_GLOMERULAR_MESANGIUM_DEVELOPMENT	GOBP_GLOMERULAR_MESANGIUM_DEVELOPMENT	16	0.609533	1.39916	0.0829959	0.168909	1	3295	tags=56%, list=21%, signal=72%
GOBP_T_CELL_CHEMOTAXIS	GOBP_T_CELL_CHEMOTAXIS	23	0.621437	1.39915	0.0943775	0.168796	1	2953	tags=48%, list=19%, signal=59%
GOBP_LYMPH_NODE_DEVELOPMENT	GOBP_LYMPH_NODE_DEVELOPMENT	18	0.632635	1.39915	0.101796	0.168675	1	3189	tags=61%, list=21%, signal=77%
GOBP_PEPTIDYL_SERINE_MODIFICATION	GOBP_PEPTIDYL_SERINE_MODIFICATION	309	0.325967	1.39837	0.0182186	0.16931	1	3790	tags=28%, list=25%, signal=36%
GOBP_PHOSPHATIDYLINOSITOL_BIOSYNTHETIC_PROCESS	GOBP_PHOSPHATIDYLINOSITOL_BIOSYNTHETIC_PROCESS	121	0.317056	1.39808	0.0601202	0.169475	1	4906	tags=39%, list=32%, signal=57%
GOBP_SARCOMERE_ORGANIZATION	GOBP_SARCOMERE_ORGANIZATION	41	0.537412	1.39768	0.0558767	0.169755	1	2516	tags=29%, list=16%, signal=35%
GOBP_NEGATIVE_REGULATION_OF_NEURON_DEATH	GOBP_NEGATIVE_REGULATION_OF_NEURON_DEATH	188	0.381665	1.39717	0.0378486	0.170182	1	3187	tags=27%, list=21%, signal=34%
GOBP_RESPONSE_TO_TEMPERATURE_STIMULUS	GOBP_RESPONSE_TO_TEMPERATURE_STIMULUS	164	0.369466	1.39714	0.027668	0.170093	1	4277	tags=30%, list=28%, signal=42%
GOBP_SUBSTRATE_DEPENDENT_CELL_MIGRATION	GOBP_SUBSTRATE_DEPENDENT_CELL_MIGRATION	23	0.500001	1.39623	0.0933852	0.170878	1	3756	tags=35%, list=24%, signal=46%
GOBP_NEGATIVE_REGULATION_OF_STEM_CELL_DIFFERENTIATION	GOBP_NEGATIVE_REGULATION_OF_STEM_CELL_DIFFERENTIATION	21	0.410735	1.39613	0.110656	0.170845	1	4534	tags=33%, list=30%, signal=47%
GOBP_CELL_CELL_SIGNALING_INVOLVED_IN_CARDIAC_CONDUCTION	GOBP_CELL_CELL_SIGNALING_INVOLVED_IN_CARDIAC_CONDUCTION	30	0.594158	1.39605	0.0909091	0.170794	1	2387	tags=40%, list=16%, signal=47%
GOBP_POSITIVE_REGULATION_OF_SYNAPTIC_TRANSMISSION_GLUTAMATERGIC	GOBP_POSITIVE_REGULATION_OF_SYNAPTIC_TRANSMISSION_GLUTAMATERGIC	27	0.578294	1.39536	0.0746562	0.171372	1	3377	tags=48%, list=22%, signal=62%
GOBP_CELLULAR_RESPONSE_TO_CHEMICAL_STRESS	GOBP_CELLULAR_RESPONSE_TO_CHEMICAL_STRESS	300	0.324243	1.39519	0.0452675	0.17141	1	4313	tags=31%, list=28%, signal=42%
GOBP_ENDOPLASMIC_RETICULUM_ORGANIZATION	GOBP_ENDOPLASMIC_RETICULUM_ORGANIZATION	69	0.334411	1.39485	0.0781563	0.171638	1	2995	tags=13%, list=20%, signal=16%
GOBP_NEGATIVE_REGULATION_OF_ANDROGEN_RECEPTOR_SIGNALING_PATHWAY	GOBP_NEGATIVE_REGULATION_OF_ANDROGEN_RECEPTOR_SIGNALING_PATHWAY	15	0.546694	1.3948	0.100616	0.171558	1	789	tags=13%, list=5%, signal=14%
GOBP_ACTIVATION_OF_PROTEIN_KINASE_ACTIVITY	GOBP_ACTIVATION_OF_PROTEIN_KINASE_ACTIVITY	132	0.372867	1.39438	0.025641	0.171868	1	3795	tags=34%, list=25%, signal=45%
GOBP_RESPONSE_TO_OXYGEN_LEVELS	GOBP_RESPONSE_TO_OXYGEN_LEVELS	291	0.370856	1.39382	0.035503	0.172312	1	3397	tags=29%, list=22%, signal=36%
GOBP_REGULATION_OF_WOUND_HEALING	GOBP_REGULATION_OF_WOUND_HEALING	120	0.48072	1.39364	0.0632411	0.172409	1	3148	tags=40%, list=20%, signal=50%
GOBP_REGULATION_OF_MEMBRANE_REPOLARIZATION	GOBP_REGULATION_OF_MEMBRANE_REPOLARIZATION	31	0.561928	1.39351	0.0858283	0.172401	1	2387	tags=35%, list=16%, signal=42%
GOBP_PROTEIN_KINASE_A_SIGNALING	GOBP_PROTEIN_KINASE_A_SIGNALING	30	0.5267	1.39344	0.0582524	0.172329	1	2688	tags=37%, list=18%, signal=44%
GOBP_RESPIRATORY_SYSTEM_DEVELOPMENT	GOBP_RESPIRATORY_SYSTEM_DEVELOPMENT	194	0.437168	1.39338	0.0576132	0.172258	1	3826	tags=38%, list=25%, signal=49%
GOBP_POSITIVE_REGULATION_OF_MUSCLE_HYPERTROPHY	GOBP_POSITIVE_REGULATION_OF_MUSCLE_HYPERTROPHY	25	0.524739	1.39325	0.0752475	0.172258	1	4091	tags=48%, list=27%, signal=65%
GOBP_HYDROGEN_PEROXIDE_BIOSYNTHETIC_PROCESS	GOBP_HYDROGEN_PEROXIDE_BIOSYNTHETIC_PROCESS	16	0.642687	1.39318	0.0884086	0.172213	1	2825	tags=44%, list=18%, signal=54%
GOBP_NEGATIVE_REGULATION_OF_G_PROTEIN_COUPLED_RECEPTOR_SIGNALING_PATHWAY	GOBP_NEGATIVE_REGULATION_OF_G_PROTEIN_COUPLED_RECEPTOR_SIGNALING_PATHWAY	47	0.488526	1.39262	0.0429448	0.172679	1	3323	tags=36%, list=22%, signal=46%
GOBP_EXCITATORY_SYNAPSE_ASSEMBLY	GOBP_EXCITATORY_SYNAPSE_ASSEMBLY	24	0.607802	1.39247	0.0674603	0.17271	1	3553	tags=50%, list=23%, signal=65%
GOBP_MAINTENANCE_OF_PROTEIN_LOCATION_IN_CELL	GOBP_MAINTENANCE_OF_PROTEIN_LOCATION_IN_CELL	62	0.341151	1.3919	0.0691824	0.173166	1	5013	tags=37%, list=33%, signal=55%
GOBP_POSITIVE_REGULATION_OF_DEVELOPMENTAL_GROWTH	GOBP_POSITIVE_REGULATION_OF_DEVELOPMENTAL_GROWTH	149	0.40796	1.39169	0.0472441	0.173294	1	3580	tags=32%, list=23%, signal=42%
GOBP_BRANCHING_MORPHOGENESIS_OF_AN_EPITHELIAL_TUBE	GOBP_BRANCHING_MORPHOGENESIS_OF_AN_EPITHELIAL_TUBE	148	0.438018	1.3913	0.038	0.173613	1	3385	tags=35%, list=22%, signal=45%
GOBP_GLYCOSYL_COMPOUND_CATABOLIC_PROCESS	GOBP_GLYCOSYL_COMPOUND_CATABOLIC_PROCESS	30	0.515985	1.39113	0.0871287	0.173668	1	4004	tags=43%, list=26%, signal=59%
GOBP_ACTIN_FILAMENT_BASED_TRANSPORT	GOBP_ACTIN_FILAMENT_BASED_TRANSPORT	20	0.50702	1.39096	0.0964567	0.173703	1	5452	tags=50%, list=36%, signal=77%
GOBP_POLYOL_BIOSYNTHETIC_PROCESS	GOBP_POLYOL_BIOSYNTHETIC_PROCESS	59	0.43766	1.39061	0.0444015	0.173927	1	1541	tags=19%, list=10%, signal=21%
GOBP_REGULATION_OF_PROTEIN_KINASE_C_SIGNALING	GOBP_REGULATION_OF_PROTEIN_KINASE_C_SIGNALING	16	0.54511	1.38995	0.0907336	0.174454	1	3899	tags=56%, list=25%, signal=75%
GOBP_POSITIVE_REGULATION_OF_GRANULOCYTE_CHEMOTAXIS	GOBP_POSITIVE_REGULATION_OF_GRANULOCYTE_CHEMOTAXIS	25	0.583591	1.38992	0.0849802	0.174368	1	2907	tags=48%, list=19%, signal=59%
GOBP_REGULATION_OF_G_PROTEIN_COUPLED_RECEPTOR_SIGNALING_PATHWAY	GOBP_REGULATION_OF_G_PROTEIN_COUPLED_RECEPTOR_SIGNALING_PATHWAY	124	0.427505	1.38976	0.0499002	0.174415	1	4357	tags=44%, list=28%, signal=60%
GOBP_REGULATION_OF_DEVELOPMENTAL_GROWTH	GOBP_REGULATION_OF_DEVELOPMENTAL_GROWTH	294	0.396351	1.38937	0.034	0.174674	1	3710	tags=34%, list=24%, signal=44%
GOBP_VASCULAR_ASSOCIATED_SMOOTH_MUSCLE_CELL_DIFFERENTIATION	GOBP_VASCULAR_ASSOCIATED_SMOOTH_MUSCLE_CELL_DIFFERENTIATION	26	0.533407	1.3891	0.10387	0.174801	1	3440	tags=42%, list=22%, signal=54%
GOBP_REGULATION_OF_T_HELPER_17_CELL_DIFFERENTIATION	GOBP_REGULATION_OF_T_HELPER_17_CELL_DIFFERENTIATION	17	0.62607	1.38899	0.10387	0.174789	1	4188	tags=65%, list=27%, signal=89%
GOBP_NEGATIVE_REGULATION_OF_POSTTRANSCRIPTIONAL_GENE_SILENCING	GOBP_NEGATIVE_REGULATION_OF_POSTTRANSCRIPTIONAL_GENE_SILENCING	15	0.522776	1.38898	0.108384	0.174685	1	2538	tags=27%, list=17%, signal=32%
GOBP_REGULATION_OF_EXTRINSIC_APOPTOTIC_SIGNALING_PATHWAY_IN_ABSENCE_OF_LIGAND	GOBP_REGULATION_OF_EXTRINSIC_APOPTOTIC_SIGNALING_PATHWAY_IN_ABSENCE_OF_LIGAND	41	0.515659	1.38847	0.0850202	0.175085	1	1224	tags=20%, list=8%, signal=21%
GOBP_REGULATION_OF_EXCRETION	GOBP_REGULATION_OF_EXCRETION	21	0.560802	1.38829	0.0783505	0.175151	1	2736	tags=38%, list=18%, signal=46%
GOBP_REGULATION_OF_OSSIFICATION	GOBP_REGULATION_OF_OSSIFICATION	107	0.467553	1.38827	0.0564516	0.175042	1	3883	tags=43%, list=25%, signal=57%
GOBP_REGULATION_OF_TRANSMEMBRANE_RECEPTOR_PROTEIN_SERINE_THREONINE_KINASE_SIGNALING_PATHWAY	GOBP_REGULATION_OF_TRANSMEMBRANE_RECEPTOR_PROTEIN_SERINE_THREONINE_KINASE_SIGNALING_PATHWAY	237	0.422815	1.38823	0.0547667	0.174947	1	3419	tags=32%, list=22%, signal=41%
GOBP_POSITIVE_REGULATION_OF_CANONICAL_WNT_SIGNALING_PATHWAY	GOBP_POSITIVE_REGULATION_OF_CANONICAL_WNT_SIGNALING_PATHWAY	96	0.410053	1.38764	0.082	0.175444	1	4753	tags=45%, list=31%, signal=64%
GOBP_CARDIAC_CHAMBER_DEVELOPMENT	GOBP_CARDIAC_CHAMBER_DEVELOPMENT	161	0.426016	1.38751	0.0585938	0.175448	1	3440	tags=37%, list=22%, signal=47%
GOBP_REGULATION_OF_RECEPTOR_LOCALIZATION_TO_SYNAPSE	GOBP_REGULATION_OF_RECEPTOR_LOCALIZATION_TO_SYNAPSE	17	0.447975	1.38727	0.0998004	0.175588	1	2351	tags=24%, list=15%, signal=28%
GOBP_EPITHELIAL_TO_MESENCHYMAL_TRANSITION	GOBP_EPITHELIAL_TO_MESENCHYMAL_TRANSITION	148	0.428507	1.38727	0.0657084	0.175467	1	4826	tags=49%, list=31%, signal=71%
GOBP_RESPONSE_TO_HEAT	GOBP_RESPONSE_TO_HEAT	98	0.366196	1.38717	0.0623742	0.175434	1	2532	tags=17%, list=16%, signal=21%
GOBP_VASCULAR_TRANSPORT	GOBP_VASCULAR_TRANSPORT	86	0.479335	1.38679	0.054902	0.175716	1	3497	tags=38%, list=23%, signal=49%
GOBP_DEFENSE_RESPONSE_TO_GRAM_NEGATIVE_BACTERIUM	GOBP_DEFENSE_RESPONSE_TO_GRAM_NEGATIVE_BACTERIUM	66	0.517797	1.38591	0.0509804	0.176496	1	2707	tags=39%, list=18%, signal=48%
GOBP_REGULATION_OF_SMALL_MOLECULE_METABOLIC_PROCESS	GOBP_REGULATION_OF_SMALL_MOLECULE_METABOLIC_PROCESS	296	0.361103	1.38583	0.0310078	0.176454	1	3810	tags=28%, list=25%, signal=37%
GOBP_ORGANOPHOSPHATE_ESTER_TRANSPORT	GOBP_ORGANOPHOSPHATE_ESTER_TRANSPORT	131	0.375581	1.38548	0.0489796	0.176668	1	3091	tags=25%, list=20%, signal=31%
GOBP_ANIMAL_ORGAN_FORMATION	GOBP_ANIMAL_ORGAN_FORMATION	63	0.5045	1.38512	0.0527383	0.176916	1	3471	tags=44%, list=23%, signal=57%
GOBP_POSITIVE_REGULATION_OF_ORGANELLE_ORGANIZATION	GOBP_POSITIVE_REGULATION_OF_ORGANELLE_ORGANIZATION	436	0.310651	1.38481	0.0536082	0.177102	1	2991	tags=20%, list=19%, signal=24%
GOBP_LONG_CHAIN_FATTY_ACID_TRANSPORT	GOBP_LONG_CHAIN_FATTY_ACID_TRANSPORT	61	0.477331	1.38447	0.0697211	0.177342	1	2248	tags=30%, list=15%, signal=34%
GOBP_POSITIVE_REGULATION_OF_RESPONSE_TO_WOUNDING	GOBP_POSITIVE_REGULATION_OF_RESPONSE_TO_WOUNDING	62	0.462957	1.38441	0.0671785	0.177287	1	3148	tags=37%, list=20%, signal=46%
GOBP_NEGATIVE_REGULATION_OF_EPITHELIAL_CELL_DIFFERENTIATION	GOBP_NEGATIVE_REGULATION_OF_EPITHELIAL_CELL_DIFFERENTIATION	44	0.479082	1.38434	0.0748441	0.177245	1	4037	tags=43%, list=26%, signal=58%
GOBP_POSITIVE_REGULATION_OF_MACROPHAGE_DIFFERENTIATION	GOBP_POSITIVE_REGULATION_OF_MACROPHAGE_DIFFERENTIATION	15	0.552388	1.38388	0.116327	0.177608	1	4571	tags=73%, list=30%, signal=104%
GOBP_REGULATION_OF_TOLL_LIKE_RECEPTOR_4_SIGNALING_PATHWAY	GOBP_REGULATION_OF_TOLL_LIKE_RECEPTOR_4_SIGNALING_PATHWAY	20	0.558702	1.38336	0.106383	0.178004	1	4036	tags=55%, list=26%, signal=75%
GOBP_REGULATION_OF_CELL_SIZE	GOBP_REGULATION_OF_CELL_SIZE	168	0.377674	1.38336	0.0493097	0.177884	1	3631	tags=29%, list=24%, signal=38%
GOBP_MULTI_MULTICELLULAR_ORGANISM_PROCESS	GOBP_MULTI_MULTICELLULAR_ORGANISM_PROCESS	197	0.426161	1.38323	0.0162933	0.177898	1	3506	tags=32%, list=23%, signal=42%
GOBP_NEGATIVE_REGULATION_OF_TUMOR_NECROSIS_FACTOR_MEDIATED_SIGNALING_PATHWAY	GOBP_NEGATIVE_REGULATION_OF_TUMOR_NECROSIS_FACTOR_MEDIATED_SIGNALING_PATHWAY	21	0.521803	1.38307	0.0786948	0.177978	1	2422	tags=29%, list=16%, signal=34%
GOBP_REGULATION_OF_SIGNALING_RECEPTOR_ACTIVITY	GOBP_REGULATION_OF_SIGNALING_RECEPTOR_ACTIVITY	147	0.428276	1.38296	0.0100604	0.177963	1	3129	tags=28%, list=20%, signal=35%
GOBP_MAMMARY_GLAND_DUCT_MORPHOGENESIS	GOBP_MAMMARY_GLAND_DUCT_MORPHOGENESIS	29	0.524248	1.38296	0.086	0.177844	1	4037	tags=55%, list=26%, signal=75%
GOBP_RESPONSE_TO_MITOCHONDRIAL_DEPOLARISATION	GOBP_RESPONSE_TO_MITOCHONDRIAL_DEPOLARISATION	15	0.409638	1.38291	0.128205	0.177764	1	6301	tags=53%, list=41%, signal=90%
GOBP_HISTAMINE_TRANSPORT	GOBP_HISTAMINE_TRANSPORT	15	0.581765	1.38274	0.0810811	0.177813	1	393	tags=20%, list=3%, signal=21%
GOBP_ACTIN_MEDIATED_CELL_CONTRACTION	GOBP_ACTIN_MEDIATED_CELL_CONTRACTION	95	0.480796	1.38219	0.0731225	0.178223	1	2531	tags=33%, list=16%, signal=39%
GOBP_NEGATIVE_REGULATION_OF_SYNAPTIC_TRANSMISSION	GOBP_NEGATIVE_REGULATION_OF_SYNAPTIC_TRANSMISSION	65	0.506737	1.38151	0.075	0.178798	1	3096	tags=35%, list=20%, signal=44%
GOBP_ATRIAL_CARDIAC_MUSCLE_CELL_TO_AV_NODE_CELL_SIGNALING	GOBP_ATRIAL_CARDIAC_MUSCLE_CELL_TO_AV_NODE_CELL_SIGNALING	17	0.649106	1.38146	0.0991903	0.178729	1	2267	tags=47%, list=15%, signal=55%
GOBP_REGULATION_OF_LIPID_STORAGE	GOBP_REGULATION_OF_LIPID_STORAGE	49	0.455167	1.38132	0.0866142	0.178756	1	5398	tags=59%, list=35%, signal=91%
GOBP_OVULATION_CYCLE_PROCESS	GOBP_OVULATION_CYCLE_PROCESS	47	0.502718	1.38112	0.0610236	0.17887	1	3160	tags=34%, list=21%, signal=43%
GOBP_PROTEIN_CONTAINING_COMPLEX_REMODELING	GOBP_PROTEIN_CONTAINING_COMPLEX_REMODELING	33	0.574342	1.38103	0.0785855	0.178852	1	3091	tags=48%, list=20%, signal=61%
GOBP_ORGAN_GROWTH	GOBP_ORGAN_GROWTH	148	0.431865	1.38072	0.060241	0.179049	1	4214	tags=42%, list=27%, signal=57%
GOBP_STRIATED_MUSCLE_ADAPTATION	GOBP_STRIATED_MUSCLE_ADAPTATION	43	0.479588	1.38027	0.0672897	0.179413	1	3572	tags=33%, list=23%, signal=42%
GOBP_3_UTR_MEDIATED_MRNA_STABILIZATION	GOBP_3_UTR_MEDIATED_MRNA_STABILIZATION	17	0.502307	1.37996	0.110039	0.179591	1	3098	tags=29%, list=20%, signal=37%
GOBP_REGULATION_OF_CALCIUM_ION_IMPORT	GOBP_REGULATION_OF_CALCIUM_ION_IMPORT	38	0.506702	1.37988	0.0529412	0.17954	1	2083	tags=34%, list=14%, signal=39%
GOBP_PROTEIN_COMPLEX_OLIGOMERIZATION	GOBP_PROTEIN_COMPLEX_OLIGOMERIZATION	232	0.346029	1.37952	0.0202429	0.179816	1	3397	tags=25%, list=22%, signal=31%
GOBP_NEGATIVE_REGULATION_OF_HYDROLASE_ACTIVITY	GOBP_NEGATIVE_REGULATION_OF_HYDROLASE_ACTIVITY	316	0.400237	1.3791	0.0323232	0.180141	1	3353	tags=32%, list=22%, signal=40%
GOBP_RENAL_FILTRATION	GOBP_RENAL_FILTRATION	21	0.57838	1.379	0.111111	0.180108	1	4354	tags=71%, list=28%, signal=100%
GOBP_NEGATIVE_REGULATION_OF_LYMPHOCYTE_APOPTOTIC_PROCESS	GOBP_NEGATIVE_REGULATION_OF_LYMPHOCYTE_APOPTOTIC_PROCESS	31	0.504406	1.37887	0.106695	0.180101	1	3519	tags=45%, list=23%, signal=58%
GOBP_SECONDARY_PALATE_DEVELOPMENT	GOBP_SECONDARY_PALATE_DEVELOPMENT	24	0.552392	1.3779	0.101338	0.180927	1	3258	tags=50%, list=21%, signal=63%
GOBP_REGULATION_OF_MYELINATION	GOBP_REGULATION_OF_MYELINATION	43	0.458113	1.37783	0.083499	0.180862	1	2088	tags=30%, list=14%, signal=35%
GOBP_MORPHOGENESIS_OF_AN_ENDOTHELIUM	GOBP_MORPHOGENESIS_OF_AN_ENDOTHELIUM	17	0.556236	1.37736	0.122318	0.181265	1	2532	tags=29%, list=16%, signal=35%
GOBP_POSITIVE_REGULATION_OF_SYNAPTIC_TRANSMISSION	GOBP_POSITIVE_REGULATION_OF_SYNAPTIC_TRANSMISSION	140	0.463964	1.37735	0.0335968	0.181154	1	3096	tags=33%, list=20%, signal=41%
GOBP_REGULATION_OF_VOLTAGE_GATED_CALCIUM_CHANNEL_ACTIVITY	GOBP_REGULATION_OF_VOLTAGE_GATED_CALCIUM_CHANNEL_ACTIVITY	29	0.498025	1.3768	0.0787879	0.181598	1	2843	tags=38%, list=19%, signal=46%
GOBP_POSITIVE_REGULATION_OF_MACROPHAGE_ACTIVATION	GOBP_POSITIVE_REGULATION_OF_MACROPHAGE_ACTIVATION	24	0.580666	1.37679	0.0993915	0.181478	1	3087	tags=54%, list=20%, signal=68%
GOBP_POSITIVE_REGULATION_OF_MEMBRANE_POTENTIAL	GOBP_POSITIVE_REGULATION_OF_MEMBRANE_POTENTIAL	15	0.49681	1.37672	0.0988142	0.181427	1	600	tags=13%, list=4%, signal=14%
GOBP_NEGATIVE_REGULATION_OF_RESPONSE_TO_OXIDATIVE_STRESS	GOBP_NEGATIVE_REGULATION_OF_RESPONSE_TO_OXIDATIVE_STRESS	18	0.547354	1.37654	0.104	0.181505	1	1378	tags=33%, list=9%, signal=37%
GOBP_POSITIVE_REGULATION_OF_SIGNAL_TRANSDUCTION_BY_P53_CLASS_MEDIATOR	GOBP_POSITIVE_REGULATION_OF_SIGNAL_TRANSDUCTION_BY_P53_CLASS_MEDIATOR	25	0.439828	1.37647	0.122661	0.181442	1	4710	tags=36%, list=31%, signal=52%
GOBP_POSITIVE_REGULATION_OF_LIPID_TRANSPORT	GOBP_POSITIVE_REGULATION_OF_LIPID_TRANSPORT	83	0.45804	1.37622	0.0437376	0.181568	1	3186	tags=37%, list=21%, signal=47%
GOBP_REGULATION_OF_TRANSLATION_IN_RESPONSE_TO_STRESS	GOBP_REGULATION_OF_TRANSLATION_IN_RESPONSE_TO_STRESS	20	0.36566	1.37616	0.136821	0.181501	1	4247	tags=25%, list=28%, signal=35%
GOBP_REGULATION_OF_CAMP_DEPENDENT_PROTEIN_KINASE_ACTIVITY	GOBP_REGULATION_OF_CAMP_DEPENDENT_PROTEIN_KINASE_ACTIVITY	18	0.557601	1.37566	0.0876494	0.181909	1	5101	tags=61%, list=33%, signal=91%
GOBP_MATERNAL_PROCESS_INVOLVED_IN_FEMALE_PREGNANCY	GOBP_MATERNAL_PROCESS_INVOLVED_IN_FEMALE_PREGNANCY	55	0.453442	1.37551	0.0420842	0.181951	1	3936	tags=42%, list=26%, signal=56%
GOBP_NEGATIVE_REGULATION_OF_LYMPHOCYTE_DIFFERENTIATION	GOBP_NEGATIVE_REGULATION_OF_LYMPHOCYTE_DIFFERENTIATION	50	0.475439	1.37522	0.121795	0.182123	1	3075	tags=38%, list=20%, signal=47%
GOBP_NEGATIVE_REGULATION_OF_OSTEOBLAST_DIFFERENTIATION	GOBP_NEGATIVE_REGULATION_OF_OSTEOBLAST_DIFFERENTIATION	42	0.53957	1.37444	0.0718447	0.182787	1	3977	tags=45%, list=26%, signal=61%
GOBP_ENDOTHELIAL_CELL_CHEMOTAXIS	GOBP_ENDOTHELIAL_CELL_CHEMOTAXIS	26	0.539103	1.37429	0.113772	0.182811	1	3288	tags=42%, list=21%, signal=54%
GOBP_LIPID_HOMEOSTASIS	GOBP_LIPID_HOMEOSTASIS	137	0.408185	1.37406	0.0515873	0.182895	1	3300	tags=30%, list=21%, signal=38%
GOBP_STRIATED_MUSCLE_CELL_DIFFERENTIATION	GOBP_STRIATED_MUSCLE_CELL_DIFFERENTIATION	243	0.410135	1.37381	0.0530452	0.183016	1	3627	tags=33%, list=24%, signal=42%
GOBP_LYMPHOID_PROGENITOR_CELL_DIFFERENTIATION	GOBP_LYMPHOID_PROGENITOR_CELL_DIFFERENTIATION	22	0.499354	1.37308	0.0890269	0.183637	1	1875	tags=23%, list=12%, signal=26%
GOBP_PHAGOSOME_MATURATION	GOBP_PHAGOSOME_MATURATION	24	0.489655	1.37307	0.150206	0.183538	1	2762	tags=38%, list=18%, signal=46%
GOBP_EPITHELIAL_CELL_DEVELOPMENT	GOBP_EPITHELIAL_CELL_DEVELOPMENT	199	0.389127	1.37296	0.0383838	0.183533	1	3905	tags=35%, list=25%, signal=47%
GOBP_NEGATIVE_REGULATION_OF_MONONUCLEAR_CELL_MIGRATION	GOBP_NEGATIVE_REGULATION_OF_MONONUCLEAR_CELL_MIGRATION	16	0.613048	1.37295	0.114407	0.183414	1	3652	tags=69%, list=24%, signal=90%
GOBP_NEGATIVE_REGULATION_OF_DEVELOPMENTAL_GROWTH	GOBP_NEGATIVE_REGULATION_OF_DEVELOPMENTAL_GROWTH	98	0.450883	1.37253	0.064	0.183725	1	3710	tags=46%, list=24%, signal=60%
GOBP_REGULATION_OF_CLATHRIN_DEPENDENT_ENDOCYTOSIS	GOBP_REGULATION_OF_CLATHRIN_DEPENDENT_ENDOCYTOSIS	18	0.492556	1.3725	0.11368	0.183623	1	5319	tags=50%, list=35%, signal=76%
GOBP_NEGATIVE_REGULATION_OF_LIPID_CATABOLIC_PROCESS	GOBP_NEGATIVE_REGULATION_OF_LIPID_CATABOLIC_PROCESS	22	0.566417	1.37183	0.078	0.184221	1	2417	tags=50%, list=16%, signal=59%
GOBP_COMPLEMENT_ACTIVATION_ALTERNATIVE_PATHWAY	GOBP_COMPLEMENT_ACTIVATION_ALTERNATIVE_PATHWAY	16	0.691102	1.37159	0.0720165	0.184351	1	2249	tags=63%, list=15%, signal=73%
GOBP_OSTEOBLAST_DIFFERENTIATION	GOBP_OSTEOBLAST_DIFFERENTIATION	205	0.429223	1.37138	0.0793651	0.184439	1	3794	tags=35%, list=25%, signal=45%
GOBP_POSITIVE_REGULATION_OF_SMOOTH_MUSCLE_CONTRACTION	GOBP_POSITIVE_REGULATION_OF_SMOOTH_MUSCLE_CONTRACTION	27	0.547012	1.37127	0.0692308	0.184416	1	3363	tags=44%, list=22%, signal=57%
GOBP_LOW_DENSITY_LIPOPROTEIN_PARTICLE_CLEARANCE	GOBP_LOW_DENSITY_LIPOPROTEIN_PARTICLE_CLEARANCE	27	0.53725	1.37115	0.0972222	0.184426	1	4493	tags=52%, list=29%, signal=73%
GOBP_POSITIVE_REGULATION_OF_INTERLEUKIN_17_PRODUCTION	GOBP_POSITIVE_REGULATION_OF_INTERLEUKIN_17_PRODUCTION	24	0.630964	1.37077	0.109533	0.184724	1	2538	tags=54%, list=17%, signal=65%
GOBP_EPITHELIAL_TUBE_MORPHOGENESIS	GOBP_EPITHELIAL_TUBE_MORPHOGENESIS	318	0.383622	1.3699	0.0515873	0.185546	1	3610	tags=32%, list=24%, signal=41%
GOBP_MESENCHYMAL_CELL_DIFFERENTIATION	GOBP_MESENCHYMAL_CELL_DIFFERENTIATION	227	0.423371	1.36814	0.0638723	0.187305	1	3596	tags=37%, list=23%, signal=47%
GOBP_PHOTOTRANSDUCTION_VISIBLE_LIGHT	GOBP_PHOTOTRANSDUCTION_VISIBLE_LIGHT	19	0.524789	1.36757	0.0958904	0.187797	1	5042	tags=47%, list=33%, signal=70%
GOBP_MAMMARY_GLAND_EPITHELIAL_CELL_DIFFERENTIATION	GOBP_MAMMARY_GLAND_EPITHELIAL_CELL_DIFFERENTIATION	18	0.56578	1.36747	0.103239	0.187772	1	3052	tags=39%, list=20%, signal=48%
GOBP_ARF_PROTEIN_SIGNAL_TRANSDUCTION	GOBP_ARF_PROTEIN_SIGNAL_TRANSDUCTION	19	0.448313	1.3673	0.14914	0.187805	1	4623	tags=47%, list=30%, signal=68%
GOBP_PROTEIN_HOMOTETRAMERIZATION	GOBP_PROTEIN_HOMOTETRAMERIZATION	56	0.423994	1.36706	0.0496032	0.187928	1	2539	tags=27%, list=17%, signal=32%
GOBP_NEGATIVE_REGULATION_OF_LIPID_STORAGE	GOBP_NEGATIVE_REGULATION_OF_LIPID_STORAGE	20	0.561089	1.367	0.109533	0.187869	1	4197	tags=55%, list=27%, signal=76%
GOBP_LIPID_STORAGE	GOBP_LIPID_STORAGE	75	0.422375	1.36682	0.0784708	0.187904	1	5167	tags=51%, list=34%, signal=76%
GOBP_POSITIVE_REGULATION_OF_HEART_RATE	GOBP_POSITIVE_REGULATION_OF_HEART_RATE	25	0.562409	1.36671	0.0707269	0.187883	1	4293	tags=52%, list=28%, signal=72%
GOBP_MESENCHYME_DEVELOPMENT	GOBP_MESENCHYME_DEVELOPMENT	275	0.427294	1.36668	0.0665323	0.187789	1	3461	tags=36%, list=23%, signal=45%
GOBP_RESPONSE_TO_SALT	GOBP_RESPONSE_TO_SALT	17	0.498718	1.36665	0.106557	0.187695	1	2516	tags=24%, list=16%, signal=28%
GOBP_NEGATIVE_REGULATION_OF_NECROTIC_CELL_DEATH	GOBP_NEGATIVE_REGULATION_OF_NECROTIC_CELL_DEATH	16	0.447717	1.36649	0.123932	0.187727	1	4492	tags=44%, list=29%, signal=62%
GOBP_VASODILATION	GOBP_VASODILATION	43	0.526456	1.36597	0.074	0.188171	1	1941	tags=37%, list=13%, signal=42%
GOBP_INTRINSIC_APOPTOTIC_SIGNALING_PATHWAY_IN_RESPONSE_TO_OXIDATIVE_STRESS	GOBP_INTRINSIC_APOPTOTIC_SIGNALING_PATHWAY_IN_RESPONSE_TO_OXIDATIVE_STRESS	41	0.364925	1.36541	0.113821	0.18862	1	2896	tags=22%, list=19%, signal=27%
GOBP_NEGATIVE_REGULATION_OF_PEPTIDYL_TYROSINE_PHOSPHORYLATION	GOBP_NEGATIVE_REGULATION_OF_PEPTIDYL_TYROSINE_PHOSPHORYLATION	48	0.400711	1.36511	0.111801	0.188821	1	4832	tags=50%, list=31%, signal=73%
GOBP_IMMUNE_RESPONSE_TO_TUMOR_CELL	GOBP_IMMUNE_RESPONSE_TO_TUMOR_CELL	21	0.622819	1.36467	0.133891	0.189178	1	1971	tags=48%, list=13%, signal=55%
GOBP_CALCIUM_ION_IMPORT	GOBP_CALCIUM_ION_IMPORT	72	0.453454	1.36442	0.0330097	0.18933	1	3785	tags=38%, list=25%, signal=50%
GOBP_CARDIAC_MUSCLE_CELL_CONTRACTION	GOBP_CARDIAC_MUSCLE_CELL_CONTRACTION	68	0.497827	1.36433	0.0918367	0.189321	1	2452	tags=35%, list=16%, signal=42%
GOBP_POSITIVE_REGULATION_OF_MONOOXYGENASE_ACTIVITY	GOBP_POSITIVE_REGULATION_OF_MONOOXYGENASE_ACTIVITY	30	0.493152	1.36413	0.0842105	0.189413	1	2756	tags=33%, list=18%, signal=41%
GOBP_PATHWAY_RESTRICTED_SMAD_PROTEIN_PHOSPHORYLATION	GOBP_PATHWAY_RESTRICTED_SMAD_PROTEIN_PHOSPHORYLATION	62	0.471682	1.36403	0.0763209	0.189415	1	2986	tags=40%, list=19%, signal=50%
GOBP_POSITIVE_REGULATION_OF_ISOTYPE_SWITCHING	GOBP_POSITIVE_REGULATION_OF_ISOTYPE_SWITCHING	20	0.560357	1.36312	0.149789	0.190231	1	1176	tags=25%, list=8%, signal=27%
GOBP_CELL_JUNCTION_ASSEMBLY	GOBP_CELL_JUNCTION_ASSEMBLY	392	0.415013	1.36311	0.0501002	0.190129	1	3856	tags=36%, list=25%, signal=47%
GOBP_POSITIVE_REGULATION_OF_RELEASE_OF_SEQUESTERED_CALCIUM_ION_INTO_CYTOSOL	GOBP_POSITIVE_REGULATION_OF_RELEASE_OF_SEQUESTERED_CALCIUM_ION_INTO_CYTOSOL	36	0.530931	1.36306	0.0673267	0.190054	1	3361	tags=50%, list=22%, signal=64%
GOBP_SOMATIC_DIVERSIFICATION_OF_IMMUNOGLOBULINS	GOBP_SOMATIC_DIVERSIFICATION_OF_IMMUNOGLOBULINS	56	0.451105	1.36303	0.13125	0.189955	1	1176	tags=18%, list=8%, signal=19%
GOBP_REGULATION_OF_TRIGLYCERIDE_BIOSYNTHETIC_PROCESS	GOBP_REGULATION_OF_TRIGLYCERIDE_BIOSYNTHETIC_PROCESS	17	0.550652	1.36298	0.129666	0.189898	1	2249	tags=35%, list=15%, signal=41%
GOBP_RIBONUCLEOSIDE_METABOLIC_PROCESS	GOBP_RIBONUCLEOSIDE_METABOLIC_PROCESS	31	0.497121	1.36287	0.0949495	0.18987	1	4004	tags=42%, list=26%, signal=57%
GOBP_VASOCONSTRICTION	GOBP_VASOCONSTRICTION	79	0.51202	1.36286	0.0748988	0.189753	1	2516	tags=33%, list=16%, signal=39%
GOBP_REGULATION_OF_MUSCLE_CELL_DIFFERENTIATION	GOBP_REGULATION_OF_MUSCLE_CELL_DIFFERENTIATION	118	0.399146	1.36255	0.0638723	0.189954	1	3627	tags=31%, list=24%, signal=41%
GOBP_LIPID_CATABOLIC_PROCESS	GOBP_LIPID_CATABOLIC_PROCESS	292	0.369857	1.36236	0.038835	0.190067	1	3557	tags=29%, list=23%, signal=38%
GOBP_T_CELL_TOLERANCE_INDUCTION	GOBP_T_CELL_TOLERANCE_INDUCTION	15	0.684447	1.36226	0.12963	0.190034	1	3459	tags=73%, list=23%, signal=95%
GOBP_REGULATION_OF_GOLGI_ORGANIZATION	GOBP_REGULATION_OF_GOLGI_ORGANIZATION	16	0.393479	1.36223	0.130705	0.189949	1	3490	tags=25%, list=23%, signal=32%
GOBP_REGULATION_OF_ENDOTHELIAL_CELL_CHEMOTAXIS	GOBP_REGULATION_OF_ENDOTHELIAL_CELL_CHEMOTAXIS	20	0.562472	1.36215	0.101796	0.189906	1	2991	tags=45%, list=19%, signal=56%
GOBP_REVERSE_CHOLESTEROL_TRANSPORT	GOBP_REVERSE_CHOLESTEROL_TRANSPORT	16	0.594969	1.36183	0.104839	0.190101	1	2800	tags=56%, list=18%, signal=69%
GOBP_INFLAMMATORY_CELL_APOPTOTIC_PROCESS	GOBP_INFLAMMATORY_CELL_APOPTOTIC_PROCESS	19	0.566042	1.3613	0.14664	0.190531	1	2373	tags=42%, list=15%, signal=50%
GOBP_POSITIVE_REGULATION_OF_LIPID_STORAGE	GOBP_POSITIVE_REGULATION_OF_LIPID_STORAGE	23	0.509003	1.36039	0.0918367	0.191429	1	3390	tags=43%, list=22%, signal=56%
GOBP_MUSCLE_CELL_DEVELOPMENT	GOBP_MUSCLE_CELL_DEVELOPMENT	162	0.438817	1.36004	0.0617761	0.191691	1	3452	tags=35%, list=22%, signal=45%
GOBP_AMYLOID_PRECURSOR_PROTEIN_METABOLIC_PROCESS	GOBP_AMYLOID_PRECURSOR_PROTEIN_METABOLIC_PROCESS	65	0.380113	1.35996	0.082	0.191648	1	3209	tags=29%, list=21%, signal=37%
GOBP_RESPONSE_TO_ELECTRICAL_STIMULUS	GOBP_RESPONSE_TO_ELECTRICAL_STIMULUS	38	0.448005	1.35973	0.0518234	0.191758	1	3854	tags=37%, list=25%, signal=49%
GOBP_ROOF_OF_MOUTH_DEVELOPMENT	GOBP_ROOF_OF_MOUTH_DEVELOPMENT	87	0.457992	1.3592	0.107209	0.192208	1	3977	tags=40%, list=26%, signal=54%
GOBP_GLAND_MORPHOGENESIS	GOBP_GLAND_MORPHOGENESIS	119	0.443889	1.35918	0.0569745	0.192113	1	3288	tags=38%, list=21%, signal=48%
GOBP_PROTEIN_CATABOLIC_PROCESS_IN_THE_VACUOLE	GOBP_PROTEIN_CATABOLIC_PROCESS_IN_THE_VACUOLE	21	0.453334	1.35912	0.142857	0.192053	1	4952	tags=48%, list=32%, signal=70%
GOBP_CARBOHYDRATE_TRANSMEMBRANE_TRANSPORT	GOBP_CARBOHYDRATE_TRANSMEMBRANE_TRANSPORT	104	0.40124	1.35899	0.0367505	0.192062	1	3321	tags=31%, list=22%, signal=39%
GOBP_NEGATIVE_REGULATION_OF_FAT_CELL_DIFFERENTIATION	GOBP_NEGATIVE_REGULATION_OF_FAT_CELL_DIFFERENTIATION	47	0.441457	1.35862	0.10609	0.192323	1	4753	tags=51%, list=31%, signal=74%
GOBP_PROTEIN_HOMOOLIGOMERIZATION	GOBP_PROTEIN_HOMOOLIGOMERIZATION	180	0.35814	1.35857	0.0218688	0.192249	1	3083	tags=26%, list=20%, signal=32%
GOBP_TRANSMEMBRANE_RECEPTOR_PROTEIN_SERINE_THREONINE_KINASE_SIGNALING_PATHWAY	GOBP_TRANSMEMBRANE_RECEPTOR_PROTEIN_SERINE_THREONINE_KINASE_SIGNALING_PATHWAY	332	0.386085	1.3582	0.056	0.192523	1	3419	tags=29%, list=22%, signal=36%
GOBP_HEPARIN_METABOLIC_PROCESS	GOBP_HEPARIN_METABOLIC_PROCESS	15	0.546992	1.35801	0.15222	0.19258	1	5527	tags=73%, list=36%, signal=114%
GOBP_MEGAKARYOCYTE_DEVELOPMENT	GOBP_MEGAKARYOCYTE_DEVELOPMENT	16	0.529133	1.35791	0.146998	0.192542	1	2604	tags=44%, list=17%, signal=53%
GOBP_REGULATION_OF_PEPTIDYL_LYSINE_ACETYLATION	GOBP_REGULATION_OF_PEPTIDYL_LYSINE_ACETYLATION	69	0.362903	1.35787	0.0572597	0.192442	1	2942	tags=23%, list=19%, signal=29%
GOBP_FATTY_ACID_TRANSPORT	GOBP_FATTY_ACID_TRANSPORT	90	0.452483	1.35744	0.0566406	0.192749	1	2691	tags=33%, list=18%, signal=40%
GOBP_REGULATION_OF_POTASSIUM_ION_TRANSMEMBRANE_TRANSPORTER_ACTIVITY	GOBP_REGULATION_OF_POTASSIUM_ION_TRANSMEMBRANE_TRANSPORTER_ACTIVITY	53	0.48946	1.35726	0.064	0.192814	1	2400	tags=32%, list=16%, signal=38%
GOBP_MEMORY	GOBP_MEMORY	115	0.448645	1.35719	0.064	0.192767	1	3617	tags=34%, list=24%, signal=44%
GOBP_CARDIAC_VENTRICLE_DEVELOPMENT	GOBP_CARDIAC_VENTRICLE_DEVELOPMENT	122	0.427335	1.3569	0.0684932	0.192957	1	3440	tags=36%, list=22%, signal=46%
GOBP_CARDIAC_CONDUCTION	GOBP_CARDIAC_CONDUCTION	88	0.477256	1.35689	0.0764588	0.192843	1	3825	tags=40%, list=25%, signal=53%
GOBP_GRANULOCYTE_MACROPHAGE_COLONY_STIMULATING_FACTOR_PRODUCTION	GOBP_GRANULOCYTE_MACROPHAGE_COLONY_STIMULATING_FACTOR_PRODUCTION	17	0.634942	1.35685	0.0991903	0.192767	1	2468	tags=59%, list=16%, signal=70%
GOBP_CERAMIDE_BIOSYNTHETIC_PROCESS	GOBP_CERAMIDE_BIOSYNTHETIC_PROCESS	60	0.412431	1.35676	0.0503018	0.19274	1	3441	tags=27%, list=22%, signal=34%
GOBP_HISTONE_H3_K14_ACETYLATION	GOBP_HISTONE_H3_K14_ACETYLATION	17	0.477405	1.35648	0.103516	0.192901	1	602	tags=12%, list=4%, signal=12%
GOBP_POSITIVE_REGULATION_OF_PROTEIN_CONTAINING_COMPLEX_DISASSEMBLY	GOBP_POSITIVE_REGULATION_OF_PROTEIN_CONTAINING_COMPLEX_DISASSEMBLY	26	0.52415	1.35623	0.109344	0.193049	1	2708	tags=35%, list=18%, signal=42%
GOBP_REGULATION_OF_PROTEIN_ACETYLATION	GOBP_REGULATION_OF_PROTEIN_ACETYLATION	76	0.345567	1.35622	0.0681363	0.192945	1	2942	tags=21%, list=19%, signal=26%
GOBP_NEGATIVE_REGULATION_OF_CELLULAR_RESPONSE_TO_INSULIN_STIMULUS	GOBP_NEGATIVE_REGULATION_OF_CELLULAR_RESPONSE_TO_INSULIN_STIMULUS	32	0.443681	1.35603	0.0790021	0.193049	1	4645	tags=47%, list=30%, signal=67%
GOBP_SULFUR_COMPOUND_METABOLIC_PROCESS	GOBP_SULFUR_COMPOUND_METABOLIC_PROCESS	292	0.343604	1.35592	0.040404	0.193051	1	3503	tags=26%, list=23%, signal=34%
GOBP_RECEPTOR_RECYCLING	GOBP_RECEPTOR_RECYCLING	28	0.431175	1.3557	0.109127	0.193206	1	1646	tags=14%, list=11%, signal=16%
GOBP_POSITIVE_REGULATION_OF_CYTOSOLIC_CALCIUM_ION_CONCENTRATION_INVOLVED_IN_PHOSPHOLIPASE_C_ACTIVATING_G_PROTEIN_COUPLED_SIGNALING_PATHWAY	GOBP_POSITIVE_REGULATION_OF_CYTOSOLIC_CALCIUM_ION_CONCENTRATION_INVOLVED_IN_PHOSPHOLIPASE_C_ACTIVATING_G_PROTEIN_COUPLED_SIGNALING_PATHWAY	31	0.561033	1.35559	0.0963115	0.19319	1	3677	tags=61%, list=24%, signal=80%
GOBP_REGULATION_OF_PROTEIN_MATURATION	GOBP_REGULATION_OF_PROTEIN_MATURATION	59	0.407135	1.35508	0.0737052	0.193602	1	2654	tags=24%, list=17%, signal=29%
GOBP_RESPONSE_TO_INSULIN	GOBP_RESPONSE_TO_INSULIN	234	0.328257	1.35507	0.0492126	0.193494	1	5043	tags=38%, list=33%, signal=56%
GOBP_NEGATIVE_REGULATION_OF_VASCULAR_PERMEABILITY	GOBP_NEGATIVE_REGULATION_OF_VASCULAR_PERMEABILITY	16	0.612966	1.355	0.12963	0.193437	1	1393	tags=31%, list=9%, signal=34%
GOBP_REGULATION_OF_ACTION_POTENTIAL	GOBP_REGULATION_OF_ACTION_POTENTIAL	49	0.461543	1.35489	0.064	0.19344	1	2387	tags=35%, list=16%, signal=41%
GOBP_PROTEIN_CONTAINING_COMPLEX_DISASSEMBLY	GOBP_PROTEIN_CONTAINING_COMPLEX_DISASSEMBLY	215	0.287	1.35475	0.0690335	0.193477	1	4574	tags=32%, list=30%, signal=44%
GOBP_POSITIVE_REGULATION_OF_MYOBLAST_DIFFERENTIATION	GOBP_POSITIVE_REGULATION_OF_MYOBLAST_DIFFERENTIATION	21	0.513752	1.35458	0.117871	0.193521	1	2329	tags=29%, list=15%, signal=34%
GOBP_REGULATION_OF_FLAGELLATED_SPERM_MOTILITY	GOBP_REGULATION_OF_FLAGELLATED_SPERM_MOTILITY	15	0.601718	1.35448	0.0769231	0.193499	1	861	tags=20%, list=6%, signal=21%
GOBP_SOMATIC_DIVERSIFICATION_OF_IMMUNE_RECEPTORS	GOBP_SOMATIC_DIVERSIFICATION_OF_IMMUNE_RECEPTORS	68	0.436894	1.35414	0.15102	0.193734	1	2538	tags=24%, list=17%, signal=28%
GOBP_CELLULAR_PIGMENTATION	GOBP_CELLULAR_PIGMENTATION	48	0.378784	1.35395	0.121704	0.193811	1	4964	tags=35%, list=32%, signal=52%
GOBP_RAB_PROTEIN_SIGNAL_TRANSDUCTION	GOBP_RAB_PROTEIN_SIGNAL_TRANSDUCTION	19	0.478378	1.35325	0.142857	0.194439	1	4707	tags=47%, list=31%, signal=68%
GOBP_NEGATIVE_REGULATION_OF_ACTIN_FILAMENT_DEPOLYMERIZATION	GOBP_NEGATIVE_REGULATION_OF_ACTIN_FILAMENT_DEPOLYMERIZATION	37	0.462333	1.35277	0.105809	0.194858	1	4267	tags=54%, list=28%, signal=75%
GOBP_MAMMARY_GLAND_EPITHELIUM_DEVELOPMENT	GOBP_MAMMARY_GLAND_EPITHELIUM_DEVELOPMENT	64	0.448259	1.35257	0.0778443	0.194951	1	3136	tags=36%, list=20%, signal=45%
GOBP_CELLULAR_RESPONSE_TO_CADMIUM_ION	GOBP_CELLULAR_RESPONSE_TO_CADMIUM_ION	33	0.470986	1.35243	0.104723	0.195	1	2794	tags=33%, list=18%, signal=41%
GOBP_REGULATION_OF_PROTEIN_AUTOPHOSPHORYLATION	GOBP_REGULATION_OF_PROTEIN_AUTOPHOSPHORYLATION	39	0.44746	1.35167	0.119192	0.195672	1	3276	tags=36%, list=21%, signal=46%
GOBP_METAL_ION_EXPORT	GOBP_METAL_ION_EXPORT	43	0.516715	1.35147	0.0951456	0.195753	1	2864	tags=35%, list=19%, signal=43%
GOBP_NEGATIVE_REGULATION_OF_CALCIUM_ION_TRANSPORT_INTO_CYTOSOL	GOBP_NEGATIVE_REGULATION_OF_CALCIUM_ION_TRANSPORT_INTO_CYTOSOL	16	0.571556	1.3513	0.116732	0.195833	1	3225	tags=38%, list=21%, signal=47%
GOBP_CYTOPLASMIC_MICROTUBULE_ORGANIZATION	GOBP_CYTOPLASMIC_MICROTUBULE_ORGANIZATION	53	0.35836	1.3509	0.102823	0.19613	1	4449	tags=34%, list=29%, signal=48%
GOBP_TRANSEPITHELIAL_TRANSPORT	GOBP_TRANSEPITHELIAL_TRANSPORT	32	0.524769	1.35075	0.0698152	0.196164	1	3957	tags=53%, list=26%, signal=71%
GOBP_MESODERM_MORPHOGENESIS	GOBP_MESODERM_MORPHOGENESIS	65	0.447887	1.35028	0.0769231	0.196559	1	3850	tags=34%, list=25%, signal=45%
GOBP_RENAL_SODIUM_EXCRETION	GOBP_RENAL_SODIUM_EXCRETION	19	0.559285	1.34972	0.118474	0.197051	1	2736	tags=37%, list=18%, signal=45%
GOBP_EPIBOLY	GOBP_EPIBOLY	32	0.465013	1.34787	0.131417	0.198911	1	4816	tags=44%, list=31%, signal=64%
GOBP_BROWN_FAT_CELL_DIFFERENTIATION	GOBP_BROWN_FAT_CELL_DIFFERENTIATION	47	0.480357	1.34776	0.0658683	0.198884	1	2608	tags=28%, list=17%, signal=33%
GOBP_REGULATION_OF_B_CELL_DIFFERENTIATION	GOBP_REGULATION_OF_B_CELL_DIFFERENTIATION	30	0.574272	1.34759	0.180361	0.198934	1	3055	tags=57%, list=20%, signal=71%
GOBP_SENSORY_PERCEPTION_OF_PAIN	GOBP_SENSORY_PERCEPTION_OF_PAIN	88	0.491363	1.34681	0.0507099	0.199596	1	2567	tags=42%, list=17%, signal=50%
GOBP_REGULATION_OF_FIBROBLAST_MIGRATION	GOBP_REGULATION_OF_FIBROBLAST_MIGRATION	31	0.461736	1.34642	0.156576	0.199887	1	5951	tags=61%, list=39%, signal=100%
GOBP_REGULATION_OF_RENAL_SYSTEM_PROCESS	GOBP_REGULATION_OF_RENAL_SYSTEM_PROCESS	31	0.535436	1.34562	0.0995935	0.200653	1	3845	tags=52%, list=25%, signal=69%
GOBP_NEGATIVE_REGULATION_OF_PROTEIN_LOCALIZATION_TO_MEMBRANE	GOBP_NEGATIVE_REGULATION_OF_PROTEIN_LOCALIZATION_TO_MEMBRANE	29	0.449504	1.34531	0.0920245	0.200883	1	6059	tags=66%, list=39%, signal=108%
GOBP_GLIOGENESIS	GOBP_GLIOGENESIS	268	0.394484	1.3453	0.0488281	0.200766	1	3385	tags=29%, list=22%, signal=37%
GOBP_MESODERM_DEVELOPMENT	GOBP_MESODERM_DEVELOPMENT	114	0.398489	1.34522	0.0544355	0.200744	1	3850	tags=32%, list=25%, signal=42%
GOBP_CELLULAR_RESPONSE_TO_OXYGEN_RADICAL	GOBP_CELLULAR_RESPONSE_TO_OXYGEN_RADICAL	20	0.479475	1.34491	0.125969	0.200973	1	2756	tags=25%, list=18%, signal=30%
GOBP_CELLULAR_RESPONSE_TO_KETONE	GOBP_CELLULAR_RESPONSE_TO_KETONE	86	0.39815	1.34462	0.0780287	0.201159	1	3136	tags=27%, list=20%, signal=33%
GOBP_CYCLIC_NUCLEOTIDE_BIOSYNTHETIC_PROCESS	GOBP_CYCLIC_NUCLEOTIDE_BIOSYNTHETIC_PROCESS	20	0.539686	1.34397	0.109589	0.201773	1	3816	tags=45%, list=25%, signal=60%
GOBP_REGULATION_OF_GLUCOSE_IMPORT	GOBP_REGULATION_OF_GLUCOSE_IMPORT	52	0.417707	1.34375	0.0826772	0.201857	1	3209	tags=27%, list=21%, signal=34%
GOBP_HEART_FIELD_SPECIFICATION	GOBP_HEART_FIELD_SPECIFICATION	17	0.615047	1.34366	0.111789	0.201848	1	3385	tags=59%, list=22%, signal=75%
GOBP_PROTEIN_DEGLYCOSYLATION	GOBP_PROTEIN_DEGLYCOSYLATION	23	0.403772	1.34337	0.148893	0.202042	1	5467	tags=48%, list=36%, signal=74%
GOBP_POSITIVE_REGULATION_OF_PROTEIN_SECRETION	GOBP_POSITIVE_REGULATION_OF_PROTEIN_SECRETION	119	0.390335	1.34309	0.0583804	0.202219	1	3842	tags=31%, list=25%, signal=41%
GOBP_POSITIVE_REGULATION_OF_ACTIN_NUCLEATION	GOBP_POSITIVE_REGULATION_OF_ACTIN_NUCLEATION	15	0.511145	1.3427	0.151899	0.202536	1	4714	tags=53%, list=31%, signal=77%
GOBP_BONE_REMODELING	GOBP_BONE_REMODELING	84	0.45461	1.3425	0.0714286	0.202626	1	3794	tags=46%, list=25%, signal=61%
GOBP_CELLULAR_RESPONSE_TO_ABIOTIC_STIMULUS	GOBP_CELLULAR_RESPONSE_TO_ABIOTIC_STIMULUS	296	0.325372	1.3424	0.0630081	0.2026	1	3757	tags=28%, list=24%, signal=37%
GOBP_DEVELOPMENTAL_CELL_GROWTH	GOBP_DEVELOPMENTAL_CELL_GROWTH	205	0.387938	1.34233	0.0674603	0.202556	1	3680	tags=33%, list=24%, signal=43%
GOBP_DEVELOPMENTAL_GROWTH_INVOLVED_IN_MORPHOGENESIS	GOBP_DEVELOPMENTAL_GROWTH_INVOLVED_IN_MORPHOGENESIS	218	0.383933	1.34218	0.0649606	0.202577	1	3680	tags=33%, list=24%, signal=43%
GOBP_MORPHOGENESIS_OF_AN_EPITHELIUM	GOBP_MORPHOGENESIS_OF_AN_EPITHELIUM	491	0.380418	1.34177	0.0475248	0.202906	1	3610	tags=31%, list=24%, signal=40%
GOBP_NEGATIVE_REGULATION_OF_RECEPTOR_SIGNALING_PATHWAY_VIA_JAK_STAT	GOBP_NEGATIVE_REGULATION_OF_RECEPTOR_SIGNALING_PATHWAY_VIA_JAK_STAT	20	0.472601	1.34092	0.132653	0.203703	1	4607	tags=50%, list=30%, signal=71%
GOBP_POSITIVE_REGULATION_OF_GLUCOSE_TRANSMEMBRANE_TRANSPORT	GOBP_POSITIVE_REGULATION_OF_GLUCOSE_TRANSMEMBRANE_TRANSPORT	40	0.434998	1.34089	0.0966469	0.203603	1	3076	tags=30%, list=20%, signal=37%
GOBP_PROTEIN_LOCALIZATION_TO_VACUOLE	GOBP_PROTEIN_LOCALIZATION_TO_VACUOLE	62	0.292938	1.34073	0.12395	0.203671	1	5939	tags=45%, list=39%, signal=73%
GOBP_CARDIAC_MUSCLE_TISSUE_MORPHOGENESIS	GOBP_CARDIAC_MUSCLE_TISSUE_MORPHOGENESIS	59	0.464557	1.34015	0.0718447	0.204193	1	3440	tags=41%, list=22%, signal=52%
GOBP_POLYSACCHARIDE_METABOLIC_PROCESS	GOBP_POLYSACCHARIDE_METABOLIC_PROCESS	96	0.367301	1.34009	0.0740741	0.204136	1	3785	tags=30%, list=25%, signal=40%
GOBP_CENTRAL_NERVOUS_SYSTEM_PROJECTION_NEURON_AXONOGENESIS	GOBP_CENTRAL_NERVOUS_SYSTEM_PROJECTION_NEURON_AXONOGENESIS	25	0.522846	1.34001	0.138211	0.204087	1	3442	tags=36%, list=22%, signal=46%
GOBP_LONG_TERM_SYNAPTIC_DEPRESSION	GOBP_LONG_TERM_SYNAPTIC_DEPRESSION	28	0.53831	1.33965	0.0955166	0.204349	1	3096	tags=43%, list=20%, signal=54%
GOBP_RHYTHMIC_PROCESS	GOBP_RHYTHMIC_PROCESS	279	0.359695	1.33929	0.0488798	0.204636	1	2664	tags=21%, list=17%, signal=25%
GOBP_NEGATIVE_REGULATION_OF_ESTABLISHMENT_OF_PROTEIN_LOCALIZATION	GOBP_NEGATIVE_REGULATION_OF_ESTABLISHMENT_OF_PROTEIN_LOCALIZATION	108	0.365202	1.33923	0.0644491	0.204573	1	4811	tags=34%, list=31%, signal=50%
GOBP_REGULATION_OF_HEART_RATE_BY_CARDIAC_CONDUCTION	GOBP_REGULATION_OF_HEART_RATE_BY_CARDIAC_CONDUCTION	36	0.534013	1.3387	0.108163	0.204998	1	2387	tags=33%, list=16%, signal=39%
GOBP_VASCULAR_ASSOCIATED_SMOOTH_MUSCLE_CONTRACTION	GOBP_VASCULAR_ASSOCIATED_SMOOTH_MUSCLE_CONTRACTION	24	0.559258	1.33869	0.108108	0.204874	1	2516	tags=38%, list=16%, signal=45%
GOBP_OVULATION	GOBP_OVULATION	22	0.573029	1.33808	0.0909091	0.20542	1	3093	tags=45%, list=20%, signal=57%
GOBP_EPITHELIAL_CELL_DIFFERENTIATION_INVOLVED_IN_KIDNEY_DEVELOPMENT	GOBP_EPITHELIAL_CELL_DIFFERENTIATION_INVOLVED_IN_KIDNEY_DEVELOPMENT	46	0.477716	1.33796	0.0862745	0.205427	1	3419	tags=37%, list=22%, signal=47%
GOBP_GLYCOSPHINGOLIPID_METABOLIC_PROCESS	GOBP_GLYCOSPHINGOLIPID_METABOLIC_PROCESS	54	0.413725	1.33765	0.101761	0.205633	1	4682	tags=35%, list=30%, signal=50%
GOBP_RESPONSE_TO_CATECHOLAMINE	GOBP_RESPONSE_TO_CATECHOLAMINE	90	0.404049	1.33722	0.0555556	0.206005	1	3646	tags=31%, list=24%, signal=41%
GOBP_POSITIVE_REGULATION_OF_GLYCOLYTIC_PROCESS	GOBP_POSITIVE_REGULATION_OF_GLYCOLYTIC_PROCESS	19	0.554312	1.3371	0.0910891	0.205992	1	2517	tags=37%, list=16%, signal=44%
GOBP_POSITIVE_REGULATION_OF_SMAD_PROTEIN_SIGNAL_TRANSDUCTION	GOBP_POSITIVE_REGULATION_OF_SMAD_PROTEIN_SIGNAL_TRANSDUCTION	18	0.518831	1.33669	0.136735	0.206326	1	4437	tags=56%, list=29%, signal=78%
GOBP_REGULATION_OF_SYNAPSE_STRUCTURE_OR_ACTIVITY	GOBP_REGULATION_OF_SYNAPSE_STRUCTURE_OR_ACTIVITY	191	0.430788	1.33668	0.0670498	0.206217	1	3418	tags=32%, list=22%, signal=41%
GOBP_INTERFERON_GAMMA_MEDIATED_SIGNALING_PATHWAY	GOBP_INTERFERON_GAMMA_MEDIATED_SIGNALING_PATHWAY	23	0.527947	1.33628	0.151277	0.206521	1	3251	tags=43%, list=21%, signal=55%
GOBP_NEUROTRANSMITTER_UPTAKE	GOBP_NEUROTRANSMITTER_UPTAKE	42	0.512718	1.33624	0.0610236	0.206435	1	1783	tags=26%, list=12%, signal=30%
GOBP_RETROGRADE_TRANSPORT_ENDOSOME_TO_GOLGI	GOBP_RETROGRADE_TRANSPORT_ENDOSOME_TO_GOLGI	76	0.272613	1.33554	0.146392	0.207029	1	974	tags=5%, list=6%, signal=6%
GOBP_EMBRYONIC_HEART_TUBE_MORPHOGENESIS	GOBP_EMBRYONIC_HEART_TUBE_MORPHOGENESIS	66	0.402164	1.33486	0.0925553	0.207641	1	3851	tags=36%, list=25%, signal=48%
GOBP_CELLULAR_RESPONSE_TO_ESTROGEN_STIMULUS	GOBP_CELLULAR_RESPONSE_TO_ESTROGEN_STIMULUS	15	0.566512	1.33436	0.129098	0.208074	1	5205	tags=73%, list=34%, signal=111%
GOBP_NEGATIVE_REGULATION_OF_PROTEIN_LOCALIZATION_TO_CELL_PERIPHERY	GOBP_NEGATIVE_REGULATION_OF_PROTEIN_LOCALIZATION_TO_CELL_PERIPHERY	25	0.475782	1.33425	0.112903	0.20807	1	6059	tags=72%, list=39%, signal=119%
GOBP_RESPONSE_TO_ISOQUINOLINE_ALKALOID	GOBP_RESPONSE_TO_ISOQUINOLINE_ALKALOID	28	0.503758	1.33425	0.0958084	0.207946	1	1737	tags=29%, list=11%, signal=32%
GOBP_NEGATIVE_REGULATION_OF_AMINE_TRANSPORT	GOBP_NEGATIVE_REGULATION_OF_AMINE_TRANSPORT	26	0.591806	1.33399	0.105159	0.208099	1	3897	tags=62%, list=25%, signal=82%
GOBP_PHOSPHATE_ION_TRANSPORT	GOBP_PHOSPHATE_ION_TRANSPORT	26	0.490082	1.33305	0.125257	0.208993	1	682	tags=12%, list=4%, signal=12%
GOBP_LUNG_ALVEOLUS_DEVELOPMENT	GOBP_LUNG_ALVEOLUS_DEVELOPMENT	43	0.486494	1.3328	0.104925	0.20915	1	3602	tags=42%, list=23%, signal=55%
GOBP_MATING	GOBP_MATING	39	0.517922	1.33264	0.0675676	0.209192	1	1514	tags=26%, list=10%, signal=28%
GOBP_ESTABLISHMENT_OF_PROTEIN_LOCALIZATION_TO_PLASMA_MEMBRANE	GOBP_ESTABLISHMENT_OF_PROTEIN_LOCALIZATION_TO_PLASMA_MEMBRANE	55	0.292847	1.3322	0.141153	0.209562	1	5652	tags=44%, list=37%, signal=69%
GOBP_MAMMARY_GLAND_DEVELOPMENT	GOBP_MAMMARY_GLAND_DEVELOPMENT	124	0.406821	1.33214	0.0767677	0.209499	1	3158	tags=32%, list=21%, signal=40%
GOBP_HOMOTYPIC_CELL_CELL_ADHESION	GOBP_HOMOTYPIC_CELL_CELL_ADHESION	85	0.454784	1.33186	0.0941884	0.209675	1	3111	tags=36%, list=20%, signal=45%
GOBP_PROTEIN_LOCALIZATION_TO_CILIARY_MEMBRANE	GOBP_PROTEIN_LOCALIZATION_TO_CILIARY_MEMBRANE	15	0.459089	1.33185	0.195122	0.209557	1	5446	tags=47%, list=35%, signal=72%
GOBP_KILLING_OF_CELLS_OF_ANOTHER_ORGANISM	GOBP_KILLING_OF_CELLS_OF_ANOTHER_ORGANISM	34	0.542183	1.33161	0.0996016	0.209674	1	3031	tags=35%, list=20%, signal=44%
GOBP_POSITIVE_REGULATION_OF_NATURAL_KILLER_CELL_MEDIATED_CYTOTOXICITY	GOBP_POSITIVE_REGULATION_OF_NATURAL_KILLER_CELL_MEDIATED_CYTOTOXICITY	23	0.693049	1.3312	0.158763	0.209989	1	2849	tags=65%, list=19%, signal=80%
GOBP_POSITIVE_REGULATION_OF_VIRAL_PROCESS	GOBP_POSITIVE_REGULATION_OF_VIRAL_PROCESS	55	0.323043	1.33046	0.147541	0.2107	1	2545	tags=16%, list=17%, signal=20%
GOBP_RESPONSE_TO_AMPHETAMINE	GOBP_RESPONSE_TO_AMPHETAMINE	27	0.538967	1.3298	0.0936255	0.211279	1	3854	tags=48%, list=25%, signal=64%
GOBP_PROTEIN_LOCALIZATION_TO_ENDOPLASMIC_RETICULUM	GOBP_PROTEIN_LOCALIZATION_TO_ENDOPLASMIC_RETICULUM	64	0.279858	1.32974	0.160896	0.211202	1	3364	tags=14%, list=22%, signal=18%
GOBP_REGULATION_OF_POSITIVE_CHEMOTAXIS	GOBP_REGULATION_OF_POSITIVE_CHEMOTAXIS	24	0.573428	1.32933	0.11976	0.211513	1	1845	tags=38%, list=12%, signal=43%
GOBP_POSITIVE_REGULATION_OF_REGULATORY_T_CELL_DIFFERENTIATION	GOBP_POSITIVE_REGULATION_OF_REGULATORY_T_CELL_DIFFERENTIATION	16	0.618643	1.32868	0.173913	0.212125	1	3358	tags=63%, list=22%, signal=80%
GOBP_NEURON_PROJECTION_REGENERATION	GOBP_NEURON_PROJECTION_REGENERATION	52	0.44144	1.32859	0.089613	0.212082	1	3631	tags=40%, list=24%, signal=53%
GOBP_NEGATIVE_REGULATION_OF_PEPTIDASE_ACTIVITY	GOBP_NEGATIVE_REGULATION_OF_PEPTIDASE_ACTIVITY	222	0.420433	1.32845	0.0524194	0.212104	1	3353	tags=35%, list=22%, signal=44%
GOBP_CELLULAR_OXIDANT_DETOXIFICATION	GOBP_CELLULAR_OXIDANT_DETOXIFICATION	78	0.405675	1.32826	0.0916335	0.212191	1	2802	tags=24%, list=18%, signal=30%
GOBP_REGULATION_OF_RESPONSE_TO_TUMOR_CELL	GOBP_REGULATION_OF_RESPONSE_TO_TUMOR_CELL	19	0.601982	1.32795	0.14959	0.212423	1	2585	tags=47%, list=17%, signal=57%
GOBP_GLIAL_CELL_APOPTOTIC_PROCESS	GOBP_GLIAL_CELL_APOPTOTIC_PROCESS	16	0.466654	1.32782	0.140787	0.212447	1	4645	tags=44%, list=30%, signal=63%
GOBP_SODIUM_ION_TRANSMEMBRANE_TRANSPORT	GOBP_SODIUM_ION_TRANSMEMBRANE_TRANSPORT	161	0.431458	1.32771	0.0542636	0.212433	1	3644	tags=34%, list=24%, signal=44%
GOBP_HOMOPHILIC_CELL_ADHESION_VIA_PLASMA_MEMBRANE_ADHESION_MOLECULES	GOBP_HOMOPHILIC_CELL_ADHESION_VIA_PLASMA_MEMBRANE_ADHESION_MOLECULES	141	0.486751	1.32771	0.0717054	0.212312	1	3628	tags=42%, list=24%, signal=54%
GOBP_NEGATIVE_REGULATION_OF_MUSCLE_CELL_DIFFERENTIATION	GOBP_NEGATIVE_REGULATION_OF_MUSCLE_CELL_DIFFERENTIATION	54	0.422124	1.32726	0.122449	0.212676	1	5035	tags=43%, list=33%, signal=63%
GOBP_NEGATIVE_REGULATION_OF_ENDOPLASMIC_RETICULUM_STRESS_INDUCED_INTRINSIC_APOPTOTIC_SIGNALING_PATHWAY	GOBP_NEGATIVE_REGULATION_OF_ENDOPLASMIC_RETICULUM_STRESS_INDUCED_INTRINSIC_APOPTOTIC_SIGNALING_PATHWAY	16	0.444423	1.32718	0.171488	0.212634	1	3964	tags=25%, list=26%, signal=34%
GOBP_REGULATION_OF_DNA_TEMPLATED_TRANSCRIPTION_IN_RESPONSE_TO_STRESS	GOBP_REGULATION_OF_DNA_TEMPLATED_TRANSCRIPTION_IN_RESPONSE_TO_STRESS	50	0.327446	1.32707	0.133745	0.212608	1	4748	tags=34%, list=31%, signal=49%
GOBP_RESPONSE_TO_MINERALOCORTICOID	GOBP_RESPONSE_TO_MINERALOCORTICOID	27	0.500981	1.32639	0.104508	0.213253	1	3845	tags=37%, list=25%, signal=49%
GOBP_NEGATIVE_REGULATION_OF_CELL_CYCLE_G1_S_PHASE_TRANSITION	GOBP_NEGATIVE_REGULATION_OF_CELL_CYCLE_G1_S_PHASE_TRANSITION	73	0.357985	1.32631	0.0931677	0.213235	1	4669	tags=47%, list=30%, signal=67%
GOBP_REGULATION_OF_VASCULAR_PERMEABILITY	GOBP_REGULATION_OF_VASCULAR_PERMEABILITY	46	0.476503	1.32599	0.143149	0.213444	1	1542	tags=22%, list=10%, signal=24%
GOBP_POSITIVE_REGULATION_OF_NATURAL_KILLER_CELL_MEDIATED_IMMUNITY	GOBP_POSITIVE_REGULATION_OF_NATURAL_KILLER_CELL_MEDIATED_IMMUNITY	26	0.687605	1.32586	0.160825	0.213457	1	2849	tags=65%, list=19%, signal=80%
GOBP_REGULATION_OF_SENSORY_PERCEPTION	GOBP_REGULATION_OF_SENSORY_PERCEPTION	26	0.566013	1.32562	0.0698603	0.213606	1	3397	tags=54%, list=22%, signal=69%
GOBP_RESPONSE_TO_ANTIBIOTIC	GOBP_RESPONSE_TO_ANTIBIOTIC	45	0.36186	1.32536	0.112311	0.213735	1	3807	tags=36%, list=25%, signal=47%
GOBP_PHOSPHOLIPID_TRANSPORT	GOBP_PHOSPHOLIPID_TRANSPORT	89	0.396782	1.32497	0.0835073	0.214069	1	3091	tags=29%, list=20%, signal=36%
GOBP_CARDIAC_MUSCLE_CELL_ACTION_POTENTIAL	GOBP_CARDIAC_MUSCLE_CELL_ACTION_POTENTIAL	68	0.473962	1.32483	0.101449	0.2141	1	2387	tags=31%, list=16%, signal=36%
GOBP_IMPORT_INTO_CELL	GOBP_IMPORT_INTO_CELL	213	0.393874	1.32476	0.0325203	0.214037	1	3695	tags=34%, list=24%, signal=45%
GOBP_MOTOR_NEURON_AXON_GUIDANCE	GOBP_MOTOR_NEURON_AXON_GUIDANCE	28	0.495105	1.32454	0.0991903	0.214165	1	3730	tags=39%, list=24%, signal=52%
GOBP_GLYCOSPHINGOLIPID_BIOSYNTHETIC_PROCESS	GOBP_GLYCOSPHINGOLIPID_BIOSYNTHETIC_PROCESS	30	0.504589	1.3243	0.108481	0.214325	1	3263	tags=30%, list=21%, signal=38%
GOBP_PHAGOLYSOSOME_ASSEMBLY	GOBP_PHAGOLYSOSOME_ASSEMBLY	15	0.498443	1.3241	0.176829	0.21439	1	1721	tags=27%, list=11%, signal=30%
GOBP_NEGATIVE_REGULATION_OF_AXON_EXTENSION_INVOLVED_IN_AXON_GUIDANCE	GOBP_NEGATIVE_REGULATION_OF_AXON_EXTENSION_INVOLVED_IN_AXON_GUIDANCE	25	0.524041	1.32405	0.121756	0.214334	1	3349	tags=44%, list=22%, signal=56%
GOBP_OLIGOSACCHARIDE_METABOLIC_PROCESS	GOBP_OLIGOSACCHARIDE_METABOLIC_PROCESS	58	0.437408	1.32353	0.109127	0.214772	1	4674	tags=40%, list=30%, signal=57%
GOBP_CELL_DEATH_IN_RESPONSE_TO_HYDROGEN_PEROXIDE	GOBP_CELL_DEATH_IN_RESPONSE_TO_HYDROGEN_PEROXIDE	23	0.467643	1.32351	0.115538	0.214667	1	1378	tags=22%, list=9%, signal=24%
GOBP_REGULATION_OF_NEURON_PROJECTION_DEVELOPMENT	GOBP_REGULATION_OF_NEURON_PROJECTION_DEVELOPMENT	398	0.378496	1.32351	0.074364	0.214548	1	3750	tags=33%, list=24%, signal=42%
GOBP_CELLULAR_SODIUM_ION_HOMEOSTASIS	GOBP_CELLULAR_SODIUM_ION_HOMEOSTASIS	22	0.562572	1.3232	0.10297	0.214756	1	2140	tags=32%, list=14%, signal=37%
GOBP_SYNAPSE_ORGANIZATION	GOBP_SYNAPSE_ORGANIZATION	386	0.409974	1.32291	0.0622642	0.214954	1	3418	tags=31%, list=22%, signal=39%
GOBP_POSITIVE_REGULATION_OF_DENDRITE_DEVELOPMENT	GOBP_POSITIVE_REGULATION_OF_DENDRITE_DEVELOPMENT	15	0.603083	1.32281	0.0925926	0.214941	1	2629	tags=47%, list=17%, signal=56%
GOBP_POSITIVE_REGULATION_OF_WNT_SIGNALING_PATHWAY	GOBP_POSITIVE_REGULATION_OF_WNT_SIGNALING_PATHWAY	128	0.377893	1.32238	0.0973631	0.215318	1	4609	tags=41%, list=30%, signal=58%
GOBP_PROTEIN_LOCALIZATION_TO_LYSOSOME	GOBP_PROTEIN_LOCALIZATION_TO_LYSOSOME	40	0.34146	1.32231	0.170082	0.215261	1	5939	tags=50%, list=39%, signal=81%
GOBP_CARDIAC_LEFT_VENTRICLE_MORPHOGENESIS	GOBP_CARDIAC_LEFT_VENTRICLE_MORPHOGENESIS	15	0.597689	1.32213	0.132	0.215314	1	3440	tags=47%, list=22%, signal=60%
GOBP_MEMBRANE_FUSION	GOBP_MEMBRANE_FUSION	135	0.318344	1.32154	0.0738523	0.21585	1	3202	tags=22%, list=21%, signal=28%
GOBP_NUCLEOSIDE_CATABOLIC_PROCESS	GOBP_NUCLEOSIDE_CATABOLIC_PROCESS	23	0.539238	1.32153	0.122772	0.215734	1	4004	tags=48%, list=26%, signal=65%
GOBP_SMOOTH_MUSCLE_TISSUE_DEVELOPMENT	GOBP_SMOOTH_MUSCLE_TISSUE_DEVELOPMENT	22	0.51934	1.32106	0.135729	0.216118	1	3236	tags=41%, list=21%, signal=52%
GOBP_PHOTOPERIODISM	GOBP_PHOTOPERIODISM	31	0.434144	1.32054	0.144269	0.216555	1	4315	tags=45%, list=28%, signal=63%
GOBP_ANATOMICAL_STRUCTURE_MATURATION	GOBP_ANATOMICAL_STRUCTURE_MATURATION	219	0.391163	1.32011	0.0448343	0.216935	1	2249	tags=23%, list=15%, signal=27%
GOBP_REGULATION_OF_FATTY_ACID_BIOSYNTHETIC_PROCESS	GOBP_REGULATION_OF_FATTY_ACID_BIOSYNTHETIC_PROCESS	41	0.423278	1.31916	0.11022	0.217882	1	4607	tags=44%, list=30%, signal=63%
GOBP_REGULATION_OF_WNT_SIGNALING_PATHWAY	GOBP_REGULATION_OF_WNT_SIGNALING_PATHWAY	291	0.361802	1.31914	0.0934394	0.217768	1	4479	tags=36%, list=29%, signal=50%
GOBP_REGULATION_OF_CARDIAC_MUSCLE_CELL_ACTION_POTENTIAL	GOBP_REGULATION_OF_CARDIAC_MUSCLE_CELL_ACTION_POTENTIAL	25	0.478088	1.31903	0.136719	0.217777	1	1906	tags=32%, list=12%, signal=36%
GOBP_POSITIVE_REGULATION_OF_GROWTH	GOBP_POSITIVE_REGULATION_OF_GROWTH	222	0.353387	1.31884	0.0677291	0.217878	1	4370	tags=34%, list=28%, signal=47%
GOBP_RESPONSE_TO_INCREASED_OXYGEN_LEVELS	GOBP_RESPONSE_TO_INCREASED_OXYGEN_LEVELS	25	0.448659	1.31859	0.132265	0.218039	1	3826	tags=36%, list=25%, signal=48%
GOBP_NEPHRON_DEVELOPMENT	GOBP_NEPHRON_DEVELOPMENT	142	0.4259	1.31808	0.0846457	0.218478	1	3419	tags=32%, list=22%, signal=41%
GOBP_RESPONSE_TO_ESTROGEN	GOBP_RESPONSE_TO_ESTROGEN	63	0.436628	1.31802	0.117417	0.218417	1	3486	tags=43%, list=23%, signal=55%
GOBP_PHENOL_CONTAINING_COMPOUND_METABOLIC_PROCESS	GOBP_PHENOL_CONTAINING_COMPOUND_METABOLIC_PROCESS	102	0.460474	1.31786	0.058	0.218468	1	3129	tags=37%, list=20%, signal=46%
GOBP_REGULATION_OF_TISSUE_REMODELING	GOBP_REGULATION_OF_TISSUE_REMODELING	69	0.469165	1.3176	0.0955166	0.218648	1	4370	tags=55%, list=28%, signal=77%
GOBP_SPHINGOMYELIN_METABOLIC_PROCESS	GOBP_SPHINGOMYELIN_METABOLIC_PROCESS	18	0.462899	1.31753	0.181102	0.218597	1	5260	tags=50%, list=34%, signal=76%
GOBP_MAMMARY_GLAND_ALVEOLUS_DEVELOPMENT	GOBP_MAMMARY_GLAND_ALVEOLUS_DEVELOPMENT	18	0.553608	1.31753	0.132797	0.218473	1	3610	tags=50%, list=24%, signal=65%
GOBP_AMINE_METABOLIC_PROCESS	GOBP_AMINE_METABOLIC_PROCESS	111	0.40939	1.31749	0.0566406	0.218391	1	2972	tags=30%, list=19%, signal=37%
GOBP_PIGMENTATION	GOBP_PIGMENTATION	92	0.37083	1.31738	0.0719844	0.21839	1	2762	tags=23%, list=18%, signal=28%
GOBP_EPIDERMIS_MORPHOGENESIS	GOBP_EPIDERMIS_MORPHOGENESIS	33	0.515664	1.3173	0.0838207	0.21835	1	3091	tags=39%, list=20%, signal=49%
GOBP_MUSCLE_ORGAN_MORPHOGENESIS	GOBP_MUSCLE_ORGAN_MORPHOGENESIS	77	0.443614	1.31721	0.0823529	0.218319	1	3440	tags=39%, list=22%, signal=50%
GOBP_ORGANIC_HYDROXY_COMPOUND_TRANSPORT	GOBP_ORGANIC_HYDROXY_COMPOUND_TRANSPORT	248	0.403865	1.31654	0.0385356	0.218917	1	3300	tags=31%, list=21%, signal=39%
GOBP_GLUCOSAMINE_CONTAINING_COMPOUND_METABOLIC_PROCESS	GOBP_GLUCOSAMINE_CONTAINING_COMPOUND_METABOLIC_PROCESS	22	0.513762	1.31615	0.0977597	0.21918	1	2524	tags=27%, list=16%, signal=33%
GOBP_CHAPERONE_MEDIATED_AUTOPHAGY	GOBP_CHAPERONE_MEDIATED_AUTOPHAGY	16	0.49479	1.316	0.165029	0.219206	1	1931	tags=25%, list=13%, signal=29%
GOBP_POSITIVE_REGULATION_OF_VACUOLE_ORGANIZATION	GOBP_POSITIVE_REGULATION_OF_VACUOLE_ORGANIZATION	19	0.356172	1.31538	0.182927	0.219697	1	2846	tags=21%, list=19%, signal=26%
GOBP_CELLULAR_RESPONSE_TO_INSULIN_STIMULUS	GOBP_CELLULAR_RESPONSE_TO_INSULIN_STIMULUS	183	0.325914	1.31525	0.0905512	0.219695	1	5035	tags=37%, list=33%, signal=55%
GOBP_BRANCHING_INVOLVED_IN_MAMMARY_GLAND_DUCT_MORPHOGENESIS	GOBP_BRANCHING_INVOLVED_IN_MAMMARY_GLAND_DUCT_MORPHOGENESIS	22	0.515671	1.31525	0.138943	0.219572	1	4037	tags=55%, list=26%, signal=74%
GOBP_POSITIVE_REGULATION_OF_AXON_EXTENSION	GOBP_POSITIVE_REGULATION_OF_AXON_EXTENSION	37	0.417888	1.31476	0.137725	0.219955	1	3580	tags=32%, list=23%, signal=42%
GOBP_AXON_DEVELOPMENT	GOBP_AXON_DEVELOPMENT	449	0.385525	1.31462	0.0789981	0.219977	1	3600	tags=33%, list=23%, signal=41%
GOBP_NEGATIVE_REGULATION_OF_PROTEIN_CONTAINING_COMPLEX_ASSEMBLY	GOBP_NEGATIVE_REGULATION_OF_PROTEIN_CONTAINING_COMPLEX_ASSEMBLY	126	0.343333	1.3143	0.0958904	0.220201	1	4470	tags=38%, list=29%, signal=53%
GOBP_UROGENITAL_SYSTEM_DEVELOPMENT	GOBP_UROGENITAL_SYSTEM_DEVELOPMENT	340	0.401269	1.31408	0.0859375	0.220316	1	3850	tags=36%, list=25%, signal=48%
GOBP_LYSOSOMAL_TRANSPORT	GOBP_LYSOSOMAL_TRANSPORT	111	0.26158	1.31356	0.145418	0.220803	1	5477	tags=33%, list=36%, signal=51%
GOBP_CELL_CELL_RECOGNITION	GOBP_CELL_CELL_RECOGNITION	63	0.435568	1.31312	0.0841683	0.221148	1	2757	tags=27%, list=18%, signal=33%
GOBP_POSITIVE_REGULATION_OF_MUSCLE_CELL_DIFFERENTIATION	GOBP_POSITIVE_REGULATION_OF_MUSCLE_CELL_DIFFERENTIATION	56	0.436789	1.31295	0.078629	0.221207	1	3236	tags=34%, list=21%, signal=43%
GOBP_VENTRICULAR_CARDIAC_MUSCLE_TISSUE_DEVELOPMENT	GOBP_VENTRICULAR_CARDIAC_MUSCLE_TISSUE_DEVELOPMENT	56	0.433594	1.31168	0.0916335	0.222476	1	3440	tags=39%, list=22%, signal=50%
GOBP_RESPONSE_TO_PEPTIDE_HORMONE	GOBP_RESPONSE_TO_PEPTIDE_HORMONE	364	0.332842	1.31134	0.0613861	0.222747	1	2783	tags=21%, list=18%, signal=25%
GOBP_PURINE_CONTAINING_COMPOUND_METABOLIC_PROCESS	GOBP_PURINE_CONTAINING_COMPOUND_METABOLIC_PROCESS	343	0.315931	1.31092	0.0417537	0.223095	1	3975	tags=27%, list=26%, signal=35%
GOBP_ACTIN_MYOSIN_FILAMENT_SLIDING	GOBP_ACTIN_MYOSIN_FILAMENT_SLIDING	16	0.621342	1.31072	0.124767	0.223178	1	3341	tags=38%, list=22%, signal=48%
GOBP_AMMONIUM_ION_METABOLIC_PROCESS	GOBP_AMMONIUM_ION_METABOLIC_PROCESS	23	0.556429	1.30939	0.111776	0.224629	1	3617	tags=48%, list=24%, signal=62%
GOBP_CRANIOFACIAL_SUTURE_MORPHOGENESIS	GOBP_CRANIOFACIAL_SUTURE_MORPHOGENESIS	17	0.57338	1.30903	0.137787	0.224878	1	4751	tags=53%, list=31%, signal=77%
GOBP_EXTRACELLULAR_MATRIX_DISASSEMBLY	GOBP_EXTRACELLULAR_MATRIX_DISASSEMBLY	57	0.500917	1.30875	0.143141	0.225052	1	4017	tags=44%, list=26%, signal=59%
GOBP_REGULATION_OF_PROTEASOMAL_PROTEIN_CATABOLIC_PROCESS	GOBP_REGULATION_OF_PROTEASOMAL_PROTEIN_CATABOLIC_PROCESS	167	0.226125	1.30872	0.0972222	0.224972	1	2005	tags=10%, list=13%, signal=12%
GOBP_NUCLEAR_TRANSCRIBED_MRNA_POLY_A_TAIL_SHORTENING	GOBP_NUCLEAR_TRANSCRIBED_MRNA_POLY_A_TAIL_SHORTENING	23	0.384614	1.30762	0.178641	0.226124	1	5594	tags=43%, list=36%, signal=68%
GOBP_REGULATION_OF_FATTY_ACID_BETA_OXIDATION	GOBP_REGULATION_OF_FATTY_ACID_BETA_OXIDATION	18	0.474853	1.30721	0.143969	0.226458	1	2417	tags=28%, list=16%, signal=33%
GOBP_PROSTANOID_BIOSYNTHETIC_PROCESS	GOBP_PROSTANOID_BIOSYNTHETIC_PROCESS	28	0.50803	1.30621	0.122951	0.227429	1	3363	tags=46%, list=22%, signal=59%
GOBP_CELLULAR_COMPONENT_DISASSEMBLY_INVOLVED_IN_EXECUTION_PHASE_OF_APOPTOSIS	GOBP_CELLULAR_COMPONENT_DISASSEMBLY_INVOLVED_IN_EXECUTION_PHASE_OF_APOPTOSIS	26	0.459787	1.30617	0.111332	0.227341	1	52	tags=8%, list=0%, signal=8%
GOBP_NEGATIVE_REGULATION_OF_WOUND_HEALING	GOBP_NEGATIVE_REGULATION_OF_WOUND_HEALING	69	0.505341	1.30605	0.100604	0.22736	1	3111	tags=46%, list=20%, signal=58%
GOBP_POSITIVE_REGULATION_OF_IMMUNOGLOBULIN_PRODUCTION	GOBP_POSITIVE_REGULATION_OF_IMMUNOGLOBULIN_PRODUCTION	44	0.493846	1.30544	0.1841	0.22793	1	4279	tags=50%, list=28%, signal=69%
GOBP_RESPONSE_TO_INORGANIC_SUBSTANCE	GOBP_RESPONSE_TO_INORGANIC_SUBSTANCE	478	0.339557	1.30509	0.0368098	0.228205	1	3526	tags=28%, list=23%, signal=36%
GOBP_RESPONSE_TO_LECTIN	GOBP_RESPONSE_TO_LECTIN	19	0.548297	1.30501	0.163223	0.228168	1	3839	tags=47%, list=25%, signal=63%
GOBP_REGULATION_OF_RECEPTOR_BINDING	GOBP_REGULATION_OF_RECEPTOR_BINDING	21	0.530657	1.30459	0.131631	0.228515	1	4324	tags=43%, list=28%, signal=60%
GOBP_POSITIVE_REGULATION_OF_FATTY_ACID_BIOSYNTHETIC_PROCESS	GOBP_POSITIVE_REGULATION_OF_FATTY_ACID_BIOSYNTHETIC_PROCESS	21	0.501859	1.30439	0.12449	0.22863	1	4372	tags=48%, list=28%, signal=66%
GOBP_CELL_SURFACE_RECEPTOR_SIGNALING_PATHWAY_INVOLVED_IN_HEART_DEVELOPMENT	GOBP_CELL_SURFACE_RECEPTOR_SIGNALING_PATHWAY_INVOLVED_IN_HEART_DEVELOPMENT	29	0.504348	1.30373	0.143145	0.229252	1	4861	tags=55%, list=32%, signal=81%
GOBP_RESPONSE_TO_OXYGEN_RADICAL	GOBP_RESPONSE_TO_OXYGEN_RADICAL	24	0.422516	1.30364	0.145594	0.229252	1	1700	tags=17%, list=11%, signal=19%
GOBP_REGULATION_OF_CILIUM_ASSEMBLY	GOBP_REGULATION_OF_CILIUM_ASSEMBLY	79	0.343648	1.30261	0.17	0.230295	1	4731	tags=38%, list=31%, signal=55%
GOBP_NEURON_PROJECTION_ORGANIZATION	GOBP_NEURON_PROJECTION_ORGANIZATION	82	0.398062	1.30196	0.122699	0.230896	1	3147	tags=27%, list=20%, signal=34%
GOBP_PROTEOGLYCAN_BIOSYNTHETIC_PROCESS	GOBP_PROTEOGLYCAN_BIOSYNTHETIC_PROCESS	55	0.411733	1.3016	0.144016	0.231182	1	3432	tags=31%, list=22%, signal=40%
GOBP_REGULATION_OF_UBIQUITIN_DEPENDENT_PROTEIN_CATABOLIC_PROCESS	GOBP_REGULATION_OF_UBIQUITIN_DEPENDENT_PROTEIN_CATABOLIC_PROCESS	151	0.243701	1.30153	0.117172	0.231127	1	4985	tags=29%, list=32%, signal=43%
GOBP_REGULATION_OF_ENDOTHELIAL_CELL_DIFFERENTIATION	GOBP_REGULATION_OF_ENDOTHELIAL_CELL_DIFFERENTIATION	37	0.443474	1.30146	0.137577	0.231067	1	1642	tags=22%, list=11%, signal=24%
GOBP_REGULATION_OF_T_CELL_CHEMOTAXIS	GOBP_REGULATION_OF_T_CELL_CHEMOTAXIS	15	0.602334	1.30137	0.162	0.231049	1	2953	tags=47%, list=19%, signal=58%
GOBP_REGULATION_OF_LYMPHOCYTE_CHEMOTAXIS	GOBP_REGULATION_OF_LYMPHOCYTE_CHEMOTAXIS	19	0.591474	1.30133	0.168699	0.23096	1	3336	tags=53%, list=22%, signal=67%
GOBP_NEURON_PROJECTION_EXTENSION_INVOLVED_IN_NEURON_PROJECTION_GUIDANCE	GOBP_NEURON_PROJECTION_EXTENSION_INVOLVED_IN_NEURON_PROJECTION_GUIDANCE	35	0.497675	1.30124	0.145455	0.230931	1	3409	tags=43%, list=22%, signal=55%
GOBP_ENDOMEMBRANE_SYSTEM_ORGANIZATION	GOBP_ENDOMEMBRANE_SYSTEM_ORGANIZATION	452	0.24012	1.30104	0.055666	0.231007	1	4384	tags=23%, list=29%, signal=32%
GOBP_REGULATION_OF_NEUROTRANSMITTER_RECEPTOR_ACTIVITY	GOBP_REGULATION_OF_NEUROTRANSMITTER_RECEPTOR_ACTIVITY	57	0.46571	1.30065	0.0936903	0.231332	1	2964	tags=26%, list=19%, signal=32%
GOBP_SPHINGOLIPID_METABOLIC_PROCESS	GOBP_SPHINGOLIPID_METABOLIC_PROCESS	142	0.34767	1.30058	0.0775348	0.231269	1	3557	tags=23%, list=23%, signal=30%
GOBP_FEMALE_GENITALIA_DEVELOPMENT	GOBP_FEMALE_GENITALIA_DEVELOPMENT	16	0.532007	1.30033	0.135903	0.231433	1	2953	tags=44%, list=19%, signal=54%
GOBP_REGULATION_OF_BONE_RESORPTION	GOBP_REGULATION_OF_BONE_RESORPTION	39	0.484229	1.30019	0.115686	0.231432	1	4274	tags=59%, list=28%, signal=82%
GOBP_ESTABLISHMENT_OF_TISSUE_POLARITY	GOBP_ESTABLISHMENT_OF_TISSUE_POLARITY	70	0.437404	1.30003	0.129555	0.231486	1	3417	tags=33%, list=22%, signal=42%
GOBP_CELL_CELL_SIGNALING_BY_WNT	GOBP_CELL_CELL_SIGNALING_BY_WNT	404	0.340485	1.29994	0.0976562	0.231462	1	4479	tags=35%, list=29%, signal=48%
GOBP_CELLULAR_RESPONSE_TO_OSMOTIC_STRESS	GOBP_CELLULAR_RESPONSE_TO_OSMOTIC_STRESS	39	0.406053	1.29918	0.11976	0.232268	1	4375	tags=41%, list=28%, signal=57%
GOBP_RIBONUCLEOSIDE_TRIPHOSPHATE_METABOLIC_PROCESS	GOBP_RIBONUCLEOSIDE_TRIPHOSPHATE_METABOLIC_PROCESS	54	0.316114	1.29831	0.152263	0.23316	1	798	tags=9%, list=5%, signal=10%
GOBP_RESPONSE_TO_KETONE	GOBP_RESPONSE_TO_KETONE	177	0.38788	1.29804	0.076	0.233337	1	3160	tags=26%, list=21%, signal=32%
GOBP_BRANCHING_INVOLVED_IN_SALIVARY_GLAND_MORPHOGENESIS	GOBP_BRANCHING_INVOLVED_IN_SALIVARY_GLAND_MORPHOGENESIS	21	0.515083	1.29766	0.154618	0.233683	1	3756	tags=43%, list=24%, signal=57%
GOBP_REGULATION_OF_NEURON_PROJECTION_ARBORIZATION	GOBP_REGULATION_OF_NEURON_PROJECTION_ARBORIZATION	15	0.515196	1.2972	0.164241	0.234069	1	2977	tags=33%, list=19%, signal=41%
GOBP_TRABECULA_FORMATION	GOBP_TRABECULA_FORMATION	24	0.529432	1.29711	0.163306	0.234039	1	2418	tags=33%, list=16%, signal=40%
GOBP_ORGANELLE_MEMBRANE_FUSION	GOBP_ORGANELLE_MEMBRANE_FUSION	95	0.328605	1.2966	0.125249	0.234481	1	5373	tags=46%, list=35%, signal=71%
GOBP_REGULATION_OF_PROTEIN_STABILITY	GOBP_REGULATION_OF_PROTEIN_STABILITY	259	0.236164	1.29634	0.0914634	0.234615	1	5144	tags=32%, list=33%, signal=47%
GOBP_NEGATIVE_REGULATION_OF_LIPID_METABOLIC_PROCESS	GOBP_NEGATIVE_REGULATION_OF_LIPID_METABOLIC_PROCESS	84	0.40311	1.29625	0.0883534	0.234586	1	3882	tags=38%, list=25%, signal=51%
GOBP_REGULATION_OF_CYTOPLASMIC_TRANSPORT	GOBP_REGULATION_OF_CYTOPLASMIC_TRANSPORT	23	0.383141	1.296	0.157058	0.234716	1	789	tags=9%, list=5%, signal=9%
GOBP_FOREBRAIN_CELL_MIGRATION	GOBP_FOREBRAIN_CELL_MIGRATION	60	0.434845	1.29556	0.0994264	0.235104	1	3241	tags=30%, list=21%, signal=38%
GOBP_TORC1_SIGNALING	GOBP_TORC1_SIGNALING	41	0.337076	1.29552	0.178054	0.235018	1	4491	tags=32%, list=29%, signal=45%
GOBP_POSITIVE_REGULATION_OF_TRANSMEMBRANE_RECEPTOR_PROTEIN_SERINE_THREONINE_KINASE_SIGNALING_PATHWAY	GOBP_POSITIVE_REGULATION_OF_TRANSMEMBRANE_RECEPTOR_PROTEIN_SERINE_THREONINE_KINASE_SIGNALING_PATHWAY	112	0.403831	1.29506	0.118812	0.235411	1	3419	tags=33%, list=22%, signal=42%
GOBP_POSITIVE_REGULATION_OF_CELL_JUNCTION_ASSEMBLY	GOBP_POSITIVE_REGULATION_OF_CELL_JUNCTION_ASSEMBLY	96	0.45215	1.29484	0.111531	0.235502	1	4124	tags=39%, list=27%, signal=52%
GOBP_NEUTROPHIL_HOMEOSTASIS	GOBP_NEUTROPHIL_HOMEOSTASIS	15	0.534168	1.2948	0.174442	0.235412	1	4290	tags=73%, list=28%, signal=102%
GOBP_NEGATIVE_REGULATION_OF_PROTEOLYSIS	GOBP_NEGATIVE_REGULATION_OF_PROTEOLYSIS	295	0.371773	1.29458	0.063745	0.23552	1	3371	tags=30%, list=22%, signal=37%
GOBP_PLASMA_MEMBRANE_TUBULATION	GOBP_PLASMA_MEMBRANE_TUBULATION	18	0.41781	1.29442	0.189899	0.235587	1	3554	tags=28%, list=23%, signal=36%
GOBP_PHOSPHATIDYLGLYCEROL_METABOLIC_PROCESS	GOBP_PHOSPHATIDYLGLYCEROL_METABOLIC_PROCESS	33	0.453371	1.29359	0.148221	0.236422	1	2375	tags=24%, list=15%, signal=29%
GOBP_POSITIVE_REGULATION_OF_STRIATED_MUSCLE_CELL_DIFFERENTIATION	GOBP_POSITIVE_REGULATION_OF_STRIATED_MUSCLE_CELL_DIFFERENTIATION	42	0.459288	1.2933	0.0976562	0.236646	1	3066	tags=36%, list=20%, signal=45%
GOBP_CELL_SURFACE_RECEPTOR_SIGNALING_PATHWAY_INVOLVED_IN_CELL_CELL_SIGNALING	GOBP_CELL_SURFACE_RECEPTOR_SIGNALING_PATHWAY_INVOLVED_IN_CELL_CELL_SIGNALING	493	0.343141	1.29323	0.0852273	0.236598	1	3417	tags=26%, list=22%, signal=33%
GOBP_ERBB_SIGNALING_PATHWAY	GOBP_ERBB_SIGNALING_PATHWAY	107	0.352954	1.29252	0.108911	0.237278	1	2936	tags=25%, list=19%, signal=31%
GOBP_POSITIVE_REGULATION_OF_CELL_ADHESION_MEDIATED_BY_INTEGRIN	GOBP_POSITIVE_REGULATION_OF_CELL_ADHESION_MEDIATED_BY_INTEGRIN	20	0.544531	1.29245	0.172277	0.237229	1	2508	tags=45%, list=16%, signal=54%
GOBP_CHRONIC_INFLAMMATORY_RESPONSE	GOBP_CHRONIC_INFLAMMATORY_RESPONSE	16	0.673782	1.2923	0.173554	0.237285	1	3374	tags=56%, list=22%, signal=72%
GOBP_REGULATION_OF_CELL_FATE_COMMITMENT	GOBP_REGULATION_OF_CELL_FATE_COMMITMENT	24	0.520021	1.29225	0.123482	0.237215	1	4418	tags=58%, list=29%, signal=82%
GOBP_REGULATORY_T_CELL_DIFFERENTIATION	GOBP_REGULATORY_T_CELL_DIFFERENTIATION	30	0.568687	1.29201	0.204545	0.237362	1	2527	tags=47%, list=16%, signal=56%
GOBP_CELLULAR_RESPONSE_TO_PEPTIDE_HORMONE_STIMULUS	GOBP_CELLULAR_RESPONSE_TO_PEPTIDE_HORMONE_STIMULUS	262	0.326475	1.29148	0.0951456	0.237819	1	5035	tags=39%, list=33%, signal=57%
GOBP_UNSATURATED_FATTY_ACID_BIOSYNTHETIC_PROCESS	GOBP_UNSATURATED_FATTY_ACID_BIOSYNTHETIC_PROCESS	47	0.442515	1.29014	0.11332	0.239291	1	3503	tags=40%, list=23%, signal=52%
GOBP_SCHWANN_CELL_DEVELOPMENT	GOBP_SCHWANN_CELL_DEVELOPMENT	28	0.446787	1.28981	0.18251	0.239539	1	4304	tags=36%, list=28%, signal=50%
GOBP_REGULATION_OF_ANDROGEN_RECEPTOR_SIGNALING_PATHWAY	GOBP_REGULATION_OF_ANDROGEN_RECEPTOR_SIGNALING_PATHWAY	28	0.399406	1.28977	0.162933	0.239434	1	5583	tags=43%, list=36%, signal=67%
GOBP_SCHWANN_CELL_DIFFERENTIATION	GOBP_SCHWANN_CELL_DIFFERENTIATION	34	0.421998	1.2895	0.1423	0.239645	1	3977	tags=32%, list=26%, signal=44%
GOBP_NEGATIVE_REGULATION_OF_GLUCOSE_TRANSMEMBRANE_TRANSPORT	GOBP_NEGATIVE_REGULATION_OF_GLUCOSE_TRANSMEMBRANE_TRANSPORT	16	0.563164	1.28927	0.182752	0.239767	1	1988	tags=31%, list=13%, signal=36%
GOBP_HEMATOPOIETIC_PROGENITOR_CELL_DIFFERENTIATION	GOBP_HEMATOPOIETIC_PROGENITOR_CELL_DIFFERENTIATION	117	0.371333	1.28924	0.120507	0.23967	1	2766	tags=22%, list=18%, signal=27%
GOBP_POSITIVE_REGULATION_OF_PROTEIN_AUTOPHOSPHORYLATION	GOBP_POSITIVE_REGULATION_OF_PROTEIN_AUTOPHOSPHORYLATION	24	0.438707	1.28872	0.160494	0.240158	1	3276	tags=33%, list=21%, signal=42%
GOBP_REGULATION_OF_ORGANELLE_ASSEMBLY	GOBP_REGULATION_OF_ORGANELLE_ASSEMBLY	206	0.264533	1.28867	0.141975	0.24008	1	4936	tags=31%, list=32%, signal=45%
GOBP_REGULATION_OF_NUCLEOTIDE_METABOLIC_PROCESS	GOBP_REGULATION_OF_NUCLEOTIDE_METABOLIC_PROCESS	76	0.388657	1.2884	0.0880626	0.240264	1	3073	tags=24%, list=20%, signal=29%
GOBP_RIBOSE_PHOSPHATE_METABOLIC_PROCESS	GOBP_RIBOSE_PHOSPHATE_METABOLIC_PROCESS	330	0.298326	1.28826	0.0654397	0.240298	1	3073	tags=20%, list=20%, signal=24%
GOBP_CHEMICAL_HOMEOSTASIS_WITHIN_A_TISSUE	GOBP_CHEMICAL_HOMEOSTASIS_WITHIN_A_TISSUE	15	0.55994	1.28795	0.172269	0.240539	1	2991	tags=40%, list=19%, signal=50%
GOBP_AMINO_SUGAR_METABOLIC_PROCESS	GOBP_AMINO_SUGAR_METABOLIC_PROCESS	38	0.418701	1.28722	0.132411	0.241208	1	4102	tags=39%, list=27%, signal=54%
GOBP_MORPHOGENESIS_OF_AN_EPITHELIAL_SHEET	GOBP_MORPHOGENESIS_OF_AN_EPITHELIAL_SHEET	53	0.407992	1.28721	0.155242	0.241081	1	4816	tags=40%, list=31%, signal=58%
GOBP_ENDOCRINE_PROCESS	GOBP_ENDOCRINE_PROCESS	80	0.46503	1.28681	0.0804829	0.2414	1	3363	tags=39%, list=22%, signal=49%
GOBP_MORPHOGENESIS_OF_A_BRANCHING_STRUCTURE	GOBP_MORPHOGENESIS_OF_A_BRANCHING_STRUCTURE	192	0.409865	1.28674	0.0854871	0.241337	1	3385	tags=33%, list=22%, signal=42%
GOBP_VASCULAR_ASSOCIATED_SMOOTH_MUSCLE_CELL_MIGRATION	GOBP_VASCULAR_ASSOCIATED_SMOOTH_MUSCLE_CELL_MIGRATION	21	0.538176	1.2867	0.181263	0.241239	1	2925	tags=38%, list=19%, signal=47%
GOBP_STEM_CELL_DIFFERENTIATION	GOBP_STEM_CELL_DIFFERENTIATION	206	0.385643	1.28648	0.110454	0.241409	1	3349	tags=29%, list=22%, signal=36%
GOBP_CARBOHYDRATE_TRANSPORT	GOBP_CARBOHYDRATE_TRANSPORT	135	0.362505	1.28607	0.0868726	0.241751	1	3321	tags=27%, list=22%, signal=34%
GOBP_RENAL_TUBULAR_SECRETION	GOBP_RENAL_TUBULAR_SECRETION	24	0.507649	1.2839	0.132505	0.244169	1	2736	tags=33%, list=18%, signal=40%
GOBP_POSITIVE_REGULATION_OF_ANIMAL_ORGAN_MORPHOGENESIS	GOBP_POSITIVE_REGULATION_OF_ANIMAL_ORGAN_MORPHOGENESIS	33	0.539808	1.28384	0.131115	0.244095	1	3385	tags=55%, list=22%, signal=70%
GOBP_ARGININE_METABOLIC_PROCESS	GOBP_ARGININE_METABOLIC_PROCESS	19	0.514665	1.28382	0.153101	0.243977	1	1549	tags=21%, list=10%, signal=23%
GOBP_CELLULAR_RESPONSE_TO_PROSTAGLANDIN_STIMULUS	GOBP_CELLULAR_RESPONSE_TO_PROSTAGLANDIN_STIMULUS	19	0.578309	1.28373	0.155556	0.243951	1	1356	tags=32%, list=9%, signal=35%
GOBP_INTRINSIC_APOPTOTIC_SIGNALING_PATHWAY_IN_RESPONSE_TO_DNA_DAMAGE_BY_P53_CLASS_MEDIATOR	GOBP_INTRINSIC_APOPTOTIC_SIGNALING_PATHWAY_IN_RESPONSE_TO_DNA_DAMAGE_BY_P53_CLASS_MEDIATOR	39	0.346736	1.28362	0.176221	0.243939	1	5071	tags=46%, list=33%, signal=69%
GOBP_REGULATION_OF_MEMBRANE_POTENTIAL	GOBP_REGULATION_OF_MEMBRANE_POTENTIAL	387	0.394959	1.28312	0.105769	0.244372	1	2448	tags=23%, list=16%, signal=26%
GOBP_ACIDIC_AMINO_ACID_TRANSPORT	GOBP_ACIDIC_AMINO_ACID_TRANSPORT	62	0.449111	1.28301	0.126953	0.244387	1	1644	tags=19%, list=11%, signal=22%
GOBP_SULFATION	GOBP_SULFATION	19	0.581137	1.28241	0.131474	0.244993	1	3373	tags=58%, list=22%, signal=74%
GOBP_POSITIVE_REGULATION_OF_PROTEIN_MATURATION	GOBP_POSITIVE_REGULATION_OF_PROTEIN_MATURATION	23	0.451624	1.2816	0.127907	0.245911	1	2452	tags=26%, list=16%, signal=31%
GOBP_TRANSFORMING_GROWTH_FACTOR_BETA_PRODUCTION	GOBP_TRANSFORMING_GROWTH_FACTOR_BETA_PRODUCTION	38	0.457228	1.28143	0.152	0.245968	1	2927	tags=34%, list=19%, signal=42%
GOBP_POSITIVE_REGULATION_OF_POTASSIUM_ION_TRANSPORT	GOBP_POSITIVE_REGULATION_OF_POTASSIUM_ION_TRANSPORT	44	0.485653	1.28105	0.125714	0.246286	1	2394	tags=39%, list=16%, signal=46%
GOBP_POSITIVE_REGULATION_OF_FATTY_ACID_METABOLIC_PROCESS	GOBP_POSITIVE_REGULATION_OF_FATTY_ACID_METABOLIC_PROCESS	36	0.466471	1.28103	0.134146	0.246184	1	2355	tags=25%, list=15%, signal=29%
GOBP_REGULATION_OF_LIPOPROTEIN_PARTICLE_CLEARANCE	GOBP_REGULATION_OF_LIPOPROTEIN_PARTICLE_CLEARANCE	20	0.516256	1.28095	0.134694	0.246129	1	4260	tags=50%, list=28%, signal=69%
GOBP_ARACHIDONIC_ACID_SECRETION	GOBP_ARACHIDONIC_ACID_SECRETION	29	0.492906	1.28092	0.108	0.246028	1	2548	tags=34%, list=17%, signal=41%
GOBP_REGULATION_OF_EPITHELIAL_TO_MESENCHYMAL_TRANSITION	GOBP_REGULATION_OF_EPITHELIAL_TO_MESENCHYMAL_TRANSITION	89	0.406802	1.27965	0.131048	0.247381	1	3912	tags=39%, list=25%, signal=52%
GOBP_RENAL_ABSORPTION	GOBP_RENAL_ABSORPTION	20	0.550328	1.27964	0.16501	0.24725	1	3453	tags=50%, list=22%, signal=64%
GOBP_PERICARDIUM_DEVELOPMENT	GOBP_PERICARDIUM_DEVELOPMENT	18	0.530541	1.27954	0.15275	0.247236	1	3385	tags=39%, list=22%, signal=50%
GOBP_POSITIVE_REGULATION_OF_LONG_TERM_SYNAPTIC_POTENTIATION	GOBP_POSITIVE_REGULATION_OF_LONG_TERM_SYNAPTIC_POTENTIATION	20	0.518079	1.27917	0.14257	0.247516	1	2964	tags=30%, list=19%, signal=37%
GOBP_MONOCARBOXYLIC_ACID_BIOSYNTHETIC_PROCESS	GOBP_MONOCARBOXYLIC_ACID_BIOSYNTHETIC_PROCESS	189	0.376567	1.27884	0.0747126	0.247778	1	4016	tags=36%, list=26%, signal=48%
GOBP_DEVELOPMENTAL_MATURATION	GOBP_DEVELOPMENTAL_MATURATION	264	0.37094	1.27875	0.0711462	0.247747	1	3196	tags=28%, list=21%, signal=35%
GOBP_REGULATION_OF_MYOTUBE_DIFFERENTIATION	GOBP_REGULATION_OF_MYOTUBE_DIFFERENTIATION	39	0.444963	1.27859	0.135354	0.24778	1	2812	tags=23%, list=18%, signal=28%
GOBP_SUBSTANTIA_NIGRA_DEVELOPMENT	GOBP_SUBSTANTIA_NIGRA_DEVELOPMENT	39	0.424583	1.27812	0.16	0.248256	1	1551	tags=18%, list=10%, signal=20%
GOBP_REGULATION_OF_URINE_VOLUME	GOBP_REGULATION_OF_URINE_VOLUME	19	0.516595	1.27749	0.160643	0.248834	1	5000	tags=58%, list=33%, signal=86%
GOBP_POSITIVE_REGULATION_OF_OSTEOCLAST_DIFFERENTIATION	GOBP_POSITIVE_REGULATION_OF_OSTEOCLAST_DIFFERENTIATION	23	0.538167	1.27652	0.178	0.249897	1	3758	tags=65%, list=24%, signal=86%
GOBP_RETINA_VASCULATURE_DEVELOPMENT_IN_CAMERA_TYPE_EYE	GOBP_RETINA_VASCULATURE_DEVELOPMENT_IN_CAMERA_TYPE_EYE	19	0.522079	1.27634	0.191983	0.249976	1	3759	tags=53%, list=24%, signal=70%
GOBP_IRON_ION_TRANSMEMBRANE_TRANSPORT	GOBP_IRON_ION_TRANSMEMBRANE_TRANSPORT	21	0.453875	1.27634	0.169772	0.249843	1	4324	tags=52%, list=28%, signal=73%
GOBP_REGULATION_OF_RESPIRATORY_BURST	GOBP_REGULATION_OF_RESPIRATORY_BURST	15	0.522165	1.27627	0.207031	0.249777	1	2907	tags=40%, list=19%, signal=49%
GOBP_POTASSIUM_ION_TRANSPORT	GOBP_POTASSIUM_ION_TRANSPORT	220	0.40624	1.2757	0.0833333	0.250368	1	3001	tags=29%, list=20%, signal=36%
GOBP_FATTY_ACID_BIOSYNTHETIC_PROCESS	GOBP_FATTY_ACID_BIOSYNTHETIC_PROCESS	140	0.371917	1.27511	0.0823529	0.250966	1	3984	tags=34%, list=26%, signal=46%
GOBP_VACUOLAR_TRANSPORT	GOBP_VACUOLAR_TRANSPORT	143	0.245311	1.27489	0.172414	0.251085	1	5839	tags=36%, list=38%, signal=57%
GOBP_REGULATION_OF_LYASE_ACTIVITY	GOBP_REGULATION_OF_LYASE_ACTIVITY	45	0.431132	1.27369	0.10757	0.252354	1	3612	tags=31%, list=24%, signal=41%
GOBP_REGULATION_OF_VASOCONSTRICTION	GOBP_REGULATION_OF_VASOCONSTRICTION	61	0.502511	1.27347	0.135628	0.252515	1	2516	tags=33%, list=16%, signal=39%
GOBP_REGULATION_OF_BMP_SIGNALING_PATHWAY	GOBP_REGULATION_OF_BMP_SIGNALING_PATHWAY	93	0.436498	1.27338	0.143701	0.252501	1	4037	tags=37%, list=26%, signal=49%
GOBP_POSITIVE_REGULATION_OF_ERBB_SIGNALING_PATHWAY	GOBP_POSITIVE_REGULATION_OF_ERBB_SIGNALING_PATHWAY	31	0.465643	1.27317	0.132673	0.252613	1	2794	tags=35%, list=18%, signal=43%
GOBP_GLYCOSAMINOGLYCAN_CATABOLIC_PROCESS	GOBP_GLYCOSAMINOGLYCAN_CATABOLIC_PROCESS	24	0.473715	1.27263	0.152475	0.253137	1	2943	tags=33%, list=19%, signal=41%
GOBP_PERIPHERAL_NERVOUS_SYSTEM_DEVELOPMENT	GOBP_PERIPHERAL_NERVOUS_SYSTEM_DEVELOPMENT	71	0.434944	1.27241	0.103053	0.253301	1	1268	tags=18%, list=8%, signal=20%
GOBP_REGULATION_OF_LIPID_BIOSYNTHETIC_PROCESS	GOBP_REGULATION_OF_LIPID_BIOSYNTHETIC_PROCESS	153	0.356074	1.27179	0.0945674	0.253914	1	4016	tags=35%, list=26%, signal=46%
GOBP_NEGATIVE_REGULATION_OF_WNT_SIGNALING_PATHWAY	GOBP_NEGATIVE_REGULATION_OF_WNT_SIGNALING_PATHWAY	151	0.390968	1.27137	0.121569	0.254303	1	3829	tags=34%, list=25%, signal=45%
GOBP_PROTEIN_TARGETING_TO_VACUOLE	GOBP_PROTEIN_TARGETING_TO_VACUOLE	36	0.29383	1.27136	0.184211	0.254166	1	5939	tags=53%, list=39%, signal=86%
GOBP_CHONDROITIN_SULFATE_PROTEOGLYCAN_BIOSYNTHETIC_PROCESS	GOBP_CHONDROITIN_SULFATE_PROTEOGLYCAN_BIOSYNTHETIC_PROCESS	22	0.496505	1.271	0.207661	0.254483	1	4272	tags=45%, list=28%, signal=63%
GOBP_REGULATION_OF_CILIUM_MOVEMENT	GOBP_REGULATION_OF_CILIUM_MOVEMENT	25	0.577207	1.27095	0.169524	0.254397	1	1111	tags=24%, list=7%, signal=26%
GOBP_NUCLEOTIDE_TRANSPORT	GOBP_NUCLEOTIDE_TRANSPORT	36	0.358524	1.27077	0.150391	0.254446	1	4917	tags=31%, list=32%, signal=45%
GOBP_GOLGI_TO_PLASMA_MEMBRANE_TRANSPORT	GOBP_GOLGI_TO_PLASMA_MEMBRANE_TRANSPORT	57	0.279483	1.27077	0.190574	0.254309	1	4931	tags=32%, list=32%, signal=46%
GOBP_RESPONSE_TO_FOLLICLE_STIMULATING_HORMONE	GOBP_RESPONSE_TO_FOLLICLE_STIMULATING_HORMONE	17	0.51997	1.27045	0.166329	0.254588	1	2671	tags=35%, list=17%, signal=43%
GOBP_POSITIVE_REGULATION_OF_OXIDATIVE_STRESS_INDUCED_CELL_DEATH	GOBP_POSITIVE_REGULATION_OF_OXIDATIVE_STRESS_INDUCED_CELL_DEATH	17	0.492664	1.26944	0.205128	0.255641	1	3526	tags=29%, list=23%, signal=38%
GOBP_GAP_JUNCTION_ASSEMBLY	GOBP_GAP_JUNCTION_ASSEMBLY	17	0.573705	1.26923	0.17418	0.255757	1	3717	tags=65%, list=24%, signal=85%
GOBP_PEPTIDYL_TYROSINE_DEPHOSPHORYLATION	GOBP_PEPTIDYL_TYROSINE_DEPHOSPHORYLATION	92	0.350333	1.26921	0.108949	0.255651	1	4318	tags=40%, list=28%, signal=56%
GOBP_REGULATION_OF_CELL_ADHESION_MEDIATED_BY_INTEGRIN	GOBP_REGULATION_OF_CELL_ADHESION_MEDIATED_BY_INTEGRIN	46	0.445321	1.269	0.170478	0.255771	1	3822	tags=43%, list=25%, signal=58%
GOBP_REGULATION_OF_ESTABLISHMENT_OF_PROTEIN_LOCALIZATION	GOBP_REGULATION_OF_ESTABLISHMENT_OF_PROTEIN_LOCALIZATION	455	0.286878	1.26887	0.0854871	0.255798	1	4648	tags=29%, list=30%, signal=41%
GOBP_EMBRYONIC_HEART_TUBE_DEVELOPMENT	GOBP_EMBRYONIC_HEART_TUBE_DEVELOPMENT	77	0.375116	1.26853	0.137931	0.256072	1	4378	tags=40%, list=29%, signal=56%
GOBP_REGULATION_OF_LYSOSOMAL_LUMEN_PH	GOBP_REGULATION_OF_LYSOSOMAL_LUMEN_PH	15	0.405717	1.26853	0.193548	0.255939	1	82	tags=7%, list=1%, signal=7%
GOBP_NEUTRAL_LIPID_METABOLIC_PROCESS	GOBP_NEUTRAL_LIPID_METABOLIC_PROCESS	115	0.394197	1.26806	0.115234	0.256378	1	2931	tags=29%, list=19%, signal=35%
GOBP_REGULATION_OF_INSULIN_RECEPTOR_SIGNALING_PATHWAY	GOBP_REGULATION_OF_INSULIN_RECEPTOR_SIGNALING_PATHWAY	56	0.369495	1.26795	0.117878	0.256378	1	4645	tags=38%, list=30%, signal=54%
GOBP_NEGATIVE_REGULATION_OF_APOPTOTIC_SIGNALING_PATHWAY	GOBP_NEGATIVE_REGULATION_OF_APOPTOTIC_SIGNALING_PATHWAY	199	0.312309	1.26726	0.118126	0.257085	1	3756	tags=21%, list=24%, signal=28%
GOBP_GLYCEROLIPID_CATABOLIC_PROCESS	GOBP_GLYCEROLIPID_CATABOLIC_PROCESS	62	0.426577	1.26696	0.149901	0.257299	1	3091	tags=35%, list=20%, signal=44%
GOBP_NEGATIVE_REGULATION_OF_ACTIN_FILAMENT_POLYMERIZATION	GOBP_NEGATIVE_REGULATION_OF_ACTIN_FILAMENT_POLYMERIZATION	54	0.403835	1.26658	0.155242	0.257601	1	4267	tags=46%, list=28%, signal=64%
GOBP_REGULATION_OF_CYCLASE_ACTIVITY	GOBP_REGULATION_OF_CYCLASE_ACTIVITY	48	0.432783	1.26636	0.125249	0.257751	1	3525	tags=29%, list=23%, signal=38%
GOBP_SKELETAL_MUSCLE_TISSUE_REGENERATION	GOBP_SKELETAL_MUSCLE_TISSUE_REGENERATION	31	0.395061	1.2657	0.128405	0.258442	1	3118	tags=32%, list=20%, signal=40%
GOBP_OSTEOBLAST_PROLIFERATION	GOBP_OSTEOBLAST_PROLIFERATION	29	0.522351	1.26505	0.188641	0.259045	1	3410	tags=45%, list=22%, signal=58%
GOBP_MODIFICATION_OF_SYNAPTIC_STRUCTURE	GOBP_MODIFICATION_OF_SYNAPTIC_STRUCTURE	19	0.446213	1.26491	0.183071	0.25907	1	3002	tags=26%, list=20%, signal=33%
GOBP_ACTIVATION_OF_ADENYLATE_CYCLASE_ACTIVITY	GOBP_ACTIVATION_OF_ADENYLATE_CYCLASE_ACTIVITY	26	0.521509	1.26465	0.111538	0.259248	1	1502	tags=27%, list=10%, signal=30%
GOBP_CELLULAR_RESPONSE_TO_EXTRACELLULAR_STIMULUS	GOBP_CELLULAR_RESPONSE_TO_EXTRACELLULAR_STIMULUS	219	0.303033	1.26419	0.108216	0.259666	1	4606	tags=30%, list=30%, signal=42%
GOBP_POSITIVE_REGULATION_OF_POSTTRANSCRIPTIONAL_GENE_SILENCING	GOBP_POSITIVE_REGULATION_OF_POSTTRANSCRIPTIONAL_GENE_SILENCING	30	0.430364	1.26378	0.180361	0.260015	1	2675	tags=27%, list=17%, signal=32%
GOBP_NEURON_RECOGNITION	GOBP_NEURON_RECOGNITION	48	0.488143	1.26345	0.126679	0.260269	1	3316	tags=44%, list=22%, signal=56%
GOBP_CELL_MATURATION	GOBP_CELL_MATURATION	160	0.381543	1.26337	0.0764706	0.260223	1	1618	tags=19%, list=11%, signal=21%
GOBP_TRIGLYCERIDE_METABOLIC_PROCESS	GOBP_TRIGLYCERIDE_METABOLIC_PROCESS	90	0.409739	1.26336	0.138996	0.260091	1	2375	tags=27%, list=15%, signal=31%
GOBP_NEURON_APOPTOTIC_PROCESS	GOBP_NEURON_APOPTOTIC_PROCESS	218	0.338687	1.26335	0.0663984	0.259967	1	2278	tags=21%, list=15%, signal=24%
GOBP_MYELIN_ASSEMBLY	GOBP_MYELIN_ASSEMBLY	19	0.476255	1.26323	0.164062	0.259973	1	3856	tags=37%, list=25%, signal=49%
GOBP_POSITIVE_REGULATION_OF_FOCAL_ADHESION_ASSEMBLY	GOBP_POSITIVE_REGULATION_OF_FOCAL_ADHESION_ASSEMBLY	26	0.446563	1.2632	0.178988	0.259863	1	4725	tags=42%, list=31%, signal=61%
GOBP_CELLULAR_ANION_HOMEOSTASIS	GOBP_CELLULAR_ANION_HOMEOSTASIS	16	0.461286	1.26312	0.154321	0.259814	1	2105	tags=19%, list=14%, signal=22%
GOBP_NEGATIVE_REGULATION_OF_SIGNALING_RECEPTOR_ACTIVITY	GOBP_NEGATIVE_REGULATION_OF_SIGNALING_RECEPTOR_ACTIVITY	48	0.430486	1.26305	0.126984	0.259754	1	3129	tags=29%, list=20%, signal=37%
GOBP_ACTION_POTENTIAL	GOBP_ACTION_POTENTIAL	131	0.435205	1.26249	0.130522	0.260297	1	2387	tags=27%, list=16%, signal=32%
GOBP_ESTROUS_CYCLE	GOBP_ESTROUS_CYCLE	15	0.520619	1.26183	0.193483	0.260987	1	2603	tags=33%, list=17%, signal=40%
GOBP_EXTRINSIC_APOPTOTIC_SIGNALING_PATHWAY_VIA_DEATH_DOMAIN_RECEPTORS	GOBP_EXTRINSIC_APOPTOTIC_SIGNALING_PATHWAY_VIA_DEATH_DOMAIN_RECEPTORS	76	0.379737	1.2618	0.190871	0.260891	1	3474	tags=26%, list=23%, signal=34%
GOBP_NEGATIVE_REGULATION_OF_BINDING	GOBP_NEGATIVE_REGULATION_OF_BINDING	150	0.332623	1.26177	0.114458	0.260786	1	2925	tags=21%, list=19%, signal=26%
GOBP_REGULATION_OF_PROTEIN_LOCALIZATION_TO_SYNAPSE	GOBP_REGULATION_OF_PROTEIN_LOCALIZATION_TO_SYNAPSE	18	0.44621	1.26121	0.162933	0.261293	1	4781	tags=39%, list=31%, signal=56%
GOBP_CARDIAC_MUSCLE_CELL_ACTION_POTENTIAL_INVOLVED_IN_CONTRACTION	GOBP_CARDIAC_MUSCLE_CELL_ACTION_POTENTIAL_INVOLVED_IN_CONTRACTION	48	0.484595	1.26103	0.157025	0.261363	1	2387	tags=33%, list=16%, signal=39%
GOBP_REGULATION_OF_SODIUM_ION_TRANSMEMBRANE_TRANSPORT	GOBP_REGULATION_OF_SODIUM_ION_TRANSMEMBRANE_TRANSPORT	61	0.443935	1.26053	0.170588	0.261852	1	3397	tags=38%, list=22%, signal=48%
GOBP_REGULATION_OF_PRODUCTION_OF_SMALL_RNA_INVOLVED_IN_GENE_SILENCING_BY_RNA	GOBP_REGULATION_OF_PRODUCTION_OF_SMALL_RNA_INVOLVED_IN_GENE_SILENCING_BY_RNA	22	0.457298	1.25944	0.172764	0.263	1	2675	tags=32%, list=17%, signal=38%
GOBP_FIBROBLAST_PROLIFERATION	GOBP_FIBROBLAST_PROLIFERATION	75	0.378194	1.25933	0.1841	0.262976	1	5071	tags=48%, list=33%, signal=71%
GOBP_PROTEIN_DEPOLYMERIZATION	GOBP_PROTEIN_DEPOLYMERIZATION	106	0.366177	1.25918	0.144788	0.263025	1	4574	tags=48%, list=30%, signal=68%
GOBP_MORPHOGENESIS_OF_A_POLARIZED_EPITHELIUM	GOBP_MORPHOGENESIS_OF_A_POLARIZED_EPITHELIUM	93	0.386584	1.25901	0.159363	0.263092	1	3417	tags=29%, list=22%, signal=37%
GOBP_REGULATION_OF_PROTEIN_MODIFICATION_BY_SMALL_PROTEIN_CONJUGATION_OR_REMOVAL	GOBP_REGULATION_OF_PROTEIN_MODIFICATION_BY_SMALL_PROTEIN_CONJUGATION_OR_REMOVAL	217	0.234059	1.25898	0.154167	0.262984	1	2093	tags=11%, list=14%, signal=13%
GOBP_PURINE_NUCLEOTIDE_TRANSPORT	GOBP_PURINE_NUCLEOTIDE_TRANSPORT	30	0.372067	1.2588	0.185114	0.263065	1	4917	tags=33%, list=32%, signal=49%
GOBP_POSITIVE_REGULATION_OF_LYMPHOCYTE_CHEMOTAXIS	GOBP_POSITIVE_REGULATION_OF_LYMPHOCYTE_CHEMOTAXIS	16	0.569953	1.25856	0.20284	0.26323	1	2953	tags=44%, list=19%, signal=54%
GOBP_NEGATIVE_REGULATION_OF_OXIDATIVE_STRESS_INDUCED_CELL_DEATH	GOBP_NEGATIVE_REGULATION_OF_OXIDATIVE_STRESS_INDUCED_CELL_DEATH	42	0.385893	1.25819	0.162427	0.263527	1	2173	tags=19%, list=14%, signal=22%
GOBP_MORPHOGENESIS_OF_AN_EPITHELIAL_FOLD	GOBP_MORPHOGENESIS_OF_AN_EPITHELIAL_FOLD	23	0.519911	1.25806	0.138554	0.263562	1	3136	tags=48%, list=20%, signal=60%
GOBP_PYRIDINE_NUCLEOTIDE_BIOSYNTHETIC_PROCESS	GOBP_PYRIDINE_NUCLEOTIDE_BIOSYNTHETIC_PROCESS	23	0.494436	1.25788	0.192797	0.263624	1	3014	tags=39%, list=20%, signal=49%
GOBP_CELLULAR_RESPONSE_TO_INORGANIC_SUBSTANCE	GOBP_CELLULAR_RESPONSE_TO_INORGANIC_SUBSTANCE	195	0.340635	1.25767	0.0555556	0.26377	1	3796	tags=34%, list=25%, signal=44%
GOBP_RESPONSE_TO_FIBROBLAST_GROWTH_FACTOR	GOBP_RESPONSE_TO_FIBROBLAST_GROWTH_FACTOR	102	0.406854	1.25666	0.10998	0.264782	1	3275	tags=29%, list=21%, signal=37%
GOBP_CELLULAR_RESPONSE_TO_CAMP	GOBP_CELLULAR_RESPONSE_TO_CAMP	51	0.425693	1.25661	0.132812	0.264725	1	2660	tags=33%, list=17%, signal=40%
GOBP_MITOCHONDRIAL_DEPOLARIZATION	GOBP_MITOCHONDRIAL_DEPOLARIZATION	19	0.480079	1.25657	0.161224	0.264627	1	3331	tags=42%, list=22%, signal=54%
GOBP_REGULATION_OF_PHOSPHOLIPID_TRANSPORT	GOBP_REGULATION_OF_PHOSPHOLIPID_TRANSPORT	15	0.563338	1.25629	0.171717	0.264811	1	2830	tags=40%, list=18%, signal=49%
GOBP_POSITIVE_REGULATION_OF_WOUND_HEALING	GOBP_POSITIVE_REGULATION_OF_WOUND_HEALING	52	0.43622	1.25617	0.14914	0.264824	1	3361	tags=37%, list=22%, signal=47%
GOBP_LEUKOTRIENE_METABOLIC_PROCESS	GOBP_LEUKOTRIENE_METABOLIC_PROCESS	27	0.504745	1.25555	0.159509	0.26548	1	2780	tags=37%, list=18%, signal=45%
GOBP_CELLULAR_RESPONSE_TO_NUTRIENT	GOBP_CELLULAR_RESPONSE_TO_NUTRIENT	40	0.452589	1.25506	0.150713	0.265966	1	1928	tags=25%, list=13%, signal=29%
GOBP_RESPIRATORY_SYSTEM_PROCESS	GOBP_RESPIRATORY_SYSTEM_PROCESS	34	0.479128	1.25493	0.191321	0.265987	1	3286	tags=41%, list=21%, signal=52%
GOBP_REGULATION_OF_TRANS_SYNAPTIC_SIGNALING	GOBP_REGULATION_OF_TRANS_SYNAPTIC_SIGNALING	390	0.399686	1.2548	0.0873016	0.265995	1	3560	tags=31%, list=23%, signal=39%
GOBP_OSTEOCLAST_DEVELOPMENT	GOBP_OSTEOCLAST_DEVELOPMENT	18	0.534688	1.25476	0.2	0.2659	1	4171	tags=61%, list=27%, signal=84%
GOBP_REGULATION_OF_ANIMAL_ORGAN_MORPHOGENESIS	GOBP_REGULATION_OF_ANIMAL_ORGAN_MORPHOGENESIS	124	0.443473	1.25461	0.140281	0.265944	1	3417	tags=38%, list=22%, signal=48%
GOBP_NEGATIVE_REGULATION_OF_CELL_GROWTH	GOBP_NEGATIVE_REGULATION_OF_CELL_GROWTH	169	0.36519	1.25398	0.155242	0.266551	1	4429	tags=39%, list=29%, signal=54%
GOBP_REGULATION_OF_ODONTOGENESIS	GOBP_REGULATION_OF_ODONTOGENESIS	17	0.555904	1.25394	0.168337	0.26647	1	2516	tags=47%, list=16%, signal=56%
GOBP_RESPONSE_TO_HYPEROXIA	GOBP_RESPONSE_TO_HYPEROXIA	18	0.495704	1.25379	0.174699	0.2665	1	3826	tags=44%, list=25%, signal=59%
GOBP_ENERGY_RESERVE_METABOLIC_PROCESS	GOBP_ENERGY_RESERVE_METABOLIC_PROCESS	73	0.353223	1.2537	0.117764	0.266494	1	2665	tags=19%, list=17%, signal=23%
GOBP_MAINTENANCE_OF_PROTEIN_LOCATION_IN_NUCLEUS	GOBP_MAINTENANCE_OF_PROTEIN_LOCATION_IN_NUCLEUS	23	0.314405	1.25351	0.172691	0.266597	1	3687	tags=22%, list=24%, signal=29%
GOBP_POLY_A_PLUS_MRNA_EXPORT_FROM_NUCLEUS	GOBP_POLY_A_PLUS_MRNA_EXPORT_FROM_NUCLEUS	17	0.453377	1.2533	0.220114	0.266703	1	1092	tags=12%, list=7%, signal=13%
GOBP_REGULATION_OF_SYNAPTIC_PLASTICITY	GOBP_REGULATION_OF_SYNAPTIC_PLASTICITY	171	0.409851	1.25299	0.121442	0.266917	1	3147	tags=29%, list=20%, signal=36%
GOBP_CILIUM_ORGANIZATION	GOBP_CILIUM_ORGANIZATION	318	0.396887	1.2526	0.220503	0.267273	1	4743	tags=38%, list=31%, signal=54%
GOBP_INTRINSIC_APOPTOTIC_SIGNALING_PATHWAY_IN_RESPONSE_TO_DNA_DAMAGE	GOBP_INTRINSIC_APOPTOTIC_SIGNALING_PATHWAY_IN_RESPONSE_TO_DNA_DAMAGE	93	0.328237	1.25255	0.200426	0.26719	1	3852	tags=28%, list=25%, signal=37%
GOBP_SODIUM_ION_TRANSPORT	GOBP_SODIUM_ION_TRANSPORT	225	0.395694	1.25225	0.102467	0.267411	1	3644	tags=31%, list=24%, signal=40%
GOBP_REGULATION_OF_PRESYNAPSE_ORGANIZATION	GOBP_REGULATION_OF_PRESYNAPSE_ORGANIZATION	32	0.526403	1.25207	0.156673	0.26752	1	3416	tags=34%, list=22%, signal=44%
GOBP_LENS_DEVELOPMENT_IN_CAMERA_TYPE_EYE	GOBP_LENS_DEVELOPMENT_IN_CAMERA_TYPE_EYE	80	0.366595	1.25202	0.0918367	0.267425	1	3977	tags=35%, list=26%, signal=47%
GOBP_NEGATIVE_REGULATION_OF_EPITHELIAL_TO_MESENCHYMAL_TRANSITION	GOBP_NEGATIVE_REGULATION_OF_EPITHELIAL_TO_MESENCHYMAL_TRANSITION	33	0.474291	1.2513	0.166341	0.268187	1	3275	tags=42%, list=21%, signal=54%
GOBP_REGULATION_OF_PLATELET_DERIVED_GROWTH_FACTOR_RECEPTOR_SIGNALING_PATHWAY	GOBP_REGULATION_OF_PLATELET_DERIVED_GROWTH_FACTOR_RECEPTOR_SIGNALING_PATHWAY	22	0.450749	1.25053	0.177914	0.268941	1	4475	tags=45%, list=29%, signal=64%
GOBP_REGULATION_OF_ATP_DEPENDENT_ACTIVITY	GOBP_REGULATION_OF_ATP_DEPENDENT_ACTIVITY	64	0.351724	1.25053	0.128544	0.26881	1	3341	tags=25%, list=22%, signal=32%
GOBP_NEGATIVE_REGULATION_OF_CYCLIN_DEPENDENT_PROTEIN_SERINE_THREONINE_KINASE_ACTIVITY	GOBP_NEGATIVE_REGULATION_OF_CYCLIN_DEPENDENT_PROTEIN_SERINE_THREONINE_KINASE_ACTIVITY	28	0.407417	1.25028	0.188525	0.268976	1	3710	tags=32%, list=24%, signal=42%
GOBP_PEPTIDE_CATABOLIC_PROCESS	GOBP_PEPTIDE_CATABOLIC_PROCESS	22	0.456443	1.25009	0.135524	0.269104	1	2780	tags=41%, list=18%, signal=50%
GOBP_CARBOHYDRATE_DERIVATIVE_TRANSPORT	GOBP_CARBOHYDRATE_DERIVATIVE_TRANSPORT	78	0.340232	1.24997	0.151803	0.269115	1	4253	tags=28%, list=28%, signal=39%
GOBP_NEGATIVE_REGULATION_OF_ENDOTHELIAL_CELL_APOPTOTIC_PROCESS	GOBP_NEGATIVE_REGULATION_OF_ENDOTHELIAL_CELL_APOPTOTIC_PROCESS	31	0.517187	1.24925	0.188406	0.269847	1	1593	tags=35%, list=10%, signal=40%
GOBP_PYRIDINE_NUCLEOTIDE_METABOLIC_PROCESS	GOBP_PYRIDINE_NUCLEOTIDE_METABOLIC_PROCESS	26	0.470779	1.24895	0.197872	0.270095	1	3014	tags=38%, list=20%, signal=48%
GOBP_IMPORT_ACROSS_PLASMA_MEMBRANE	GOBP_IMPORT_ACROSS_PLASMA_MEMBRANE	167	0.375934	1.24837	0.0824742	0.270637	1	3676	tags=34%, list=24%, signal=44%
GOBP_POSITIVE_REGULATION_OF_ORGANELLE_ASSEMBLY	GOBP_POSITIVE_REGULATION_OF_ORGANELLE_ASSEMBLY	74	0.303419	1.24813	0.211297	0.270806	1	3888	tags=24%, list=25%, signal=32%
GOBP_FIBROBLAST_APOPTOTIC_PROCESS	GOBP_FIBROBLAST_APOPTOTIC_PROCESS	20	0.45863	1.24805	0.222917	0.270765	1	4777	tags=50%, list=31%, signal=72%
GOBP_PROTEOGLYCAN_METABOLIC_PROCESS	GOBP_PROTEOGLYCAN_METABOLIC_PROCESS	76	0.398133	1.24798	0.160966	0.270733	1	3432	tags=30%, list=22%, signal=39%
GOBP_NEGATIVE_REGULATION_OF_SODIUM_ION_TRANSPORT	GOBP_NEGATIVE_REGULATION_OF_SODIUM_ION_TRANSPORT	18	0.503448	1.24797	0.176707	0.270603	1	1695	tags=22%, list=11%, signal=25%
GOBP_CERAMIDE_METABOLIC_PROCESS	GOBP_CERAMIDE_METABOLIC_PROCESS	93	0.348591	1.24767	0.127953	0.270831	1	3557	tags=24%, list=23%, signal=31%
GOBP_RESPONSE_TO_ESTRADIOL	GOBP_RESPONSE_TO_ESTRADIOL	114	0.370244	1.24706	0.103516	0.271466	1	4377	tags=39%, list=29%, signal=55%
GOBP_NEGATIVE_REGULATION_OF_ENDOCYTOSIS	GOBP_NEGATIVE_REGULATION_OF_ENDOCYTOSIS	51	0.374374	1.24702	0.185336	0.271375	1	4950	tags=41%, list=32%, signal=61%
GOBP_CIRCADIAN_REGULATION_OF_GENE_EXPRESSION	GOBP_CIRCADIAN_REGULATION_OF_GENE_EXPRESSION	61	0.350641	1.24701	0.164179	0.271245	1	3569	tags=26%, list=23%, signal=34%
GOBP_RESPONSE_TO_CALCIUM_ION	GOBP_RESPONSE_TO_CALCIUM_ION	136	0.382177	1.24676	0.0968379	0.271399	1	3076	tags=31%, list=20%, signal=38%
GOBP_REGULATION_OF_SUBSTRATE_ADHESION_DEPENDENT_CELL_SPREADING	GOBP_REGULATION_OF_SUBSTRATE_ADHESION_DEPENDENT_CELL_SPREADING	54	0.380832	1.24659	0.188525	0.271463	1	4236	tags=39%, list=28%, signal=54%
GOBP_FORMATION_OF_PRIMARY_GERM_LAYER	GOBP_FORMATION_OF_PRIMARY_GERM_LAYER	109	0.398345	1.24644	0.158	0.271514	1	3850	tags=31%, list=25%, signal=41%
GOBP_BONE_DEVELOPMENT	GOBP_BONE_DEVELOPMENT	202	0.385632	1.24644	0.155789	0.271373	1	4470	tags=42%, list=29%, signal=58%
GOBP_REGULATION_OF_KERATINOCYTE_PROLIFERATION	GOBP_REGULATION_OF_KERATINOCYTE_PROLIFERATION	32	0.448387	1.24629	0.166008	0.271407	1	4365	tags=47%, list=28%, signal=65%
GOBP_NEGATIVE_REGULATION_OF_GTPASE_ACTIVITY	GOBP_NEGATIVE_REGULATION_OF_GTPASE_ACTIVITY	30	0.362713	1.24598	0.192771	0.271648	1	3652	tags=30%, list=24%, signal=39%
GOBP_REGULATION_OF_ESTABLISHMENT_OF_PLANAR_POLARITY	GOBP_REGULATION_OF_ESTABLISHMENT_OF_PLANAR_POLARITY	55	0.433417	1.24596	0.180361	0.271538	1	4445	tags=45%, list=29%, signal=64%
GOBP_STEROID_HORMONE_SECRETION	GOBP_STEROID_HORMONE_SECRETION	20	0.516185	1.24575	0.145129	0.271671	1	3207	tags=45%, list=21%, signal=57%
GOBP_GLYCEROLIPID_BIOSYNTHETIC_PROCESS	GOBP_GLYCEROLIPID_BIOSYNTHETIC_PROCESS	225	0.292736	1.24558	0.125704	0.271732	1	4583	tags=33%, list=30%, signal=46%
GOBP_MONOCARBOXYLIC_ACID_TRANSPORT	GOBP_MONOCARBOXYLIC_ACID_TRANSPORT	101	0.424086	1.24423	0.0903955	0.273278	1	2660	tags=33%, list=17%, signal=39%
GOBP_VITAMIN_BIOSYNTHETIC_PROCESS	GOBP_VITAMIN_BIOSYNTHETIC_PROCESS	19	0.516705	1.24403	0.212982	0.273356	1	3756	tags=47%, list=24%, signal=63%
GOBP_KIDNEY_EPITHELIUM_DEVELOPMENT	GOBP_KIDNEY_EPITHELIUM_DEVELOPMENT	137	0.403683	1.2438	0.138462	0.273518	1	3486	tags=34%, list=23%, signal=44%
GOBP_CYCLIC_NUCLEOTIDE_METABOLIC_PROCESS	GOBP_CYCLIC_NUCLEOTIDE_METABOLIC_PROCESS	36	0.474258	1.24363	0.207392	0.273563	1	3816	tags=47%, list=25%, signal=63%
GOBP_TOOTH_MINERALIZATION	GOBP_TOOTH_MINERALIZATION	23	0.468576	1.24362	0.136634	0.273443	1	858	tags=17%, list=6%, signal=18%
GOBP_RESPONSE_TO_XENOBIOTIC_STIMULUS	GOBP_RESPONSE_TO_XENOBIOTIC_STIMULUS	359	0.359659	1.2436	0.0833333	0.273325	1	2716	tags=25%, list=18%, signal=30%
GOBP_POSITIVE_REGULATION_OF_TRANSFORMING_GROWTH_FACTOR_BETA_PRODUCTION	GOBP_POSITIVE_REGULATION_OF_TRANSFORMING_GROWTH_FACTOR_BETA_PRODUCTION	19	0.49837	1.24324	0.196532	0.273613	1	2927	tags=42%, list=19%, signal=52%
GOBP_MEMBRANE_LIPID_METABOLIC_PROCESS	GOBP_MEMBRANE_LIPID_METABOLIC_PROCESS	182	0.30558	1.24143	0.0981964	0.275752	1	3557	tags=22%, list=23%, signal=28%
GOBP_REGULATION_OF_INTRINSIC_APOPTOTIC_SIGNALING_PATHWAY	GOBP_REGULATION_OF_INTRINSIC_APOPTOTIC_SIGNALING_PATHWAY	146	0.284323	1.24124	0.185031	0.275849	1	4825	tags=27%, list=31%, signal=40%
GOBP_TRANSCYTOSIS	GOBP_TRANSCYTOSIS	20	0.492614	1.2412	0.224449	0.275758	1	3415	tags=35%, list=22%, signal=45%
GOBP_WATER_TRANSPORT	GOBP_WATER_TRANSPORT	23	0.54075	1.24099	0.187755	0.275896	1	4634	tags=57%, list=30%, signal=81%
GOBP_REGULATION_OF_NERVOUS_SYSTEM_PROCESS	GOBP_REGULATION_OF_NERVOUS_SYSTEM_PROCESS	125	0.419734	1.24084	0.142857	0.275952	1	3397	tags=32%, list=22%, signal=41%
GOBP_CARDIAC_MUSCLE_CELL_MEMBRANE_REPOLARIZATION	GOBP_CARDIAC_MUSCLE_CELL_MEMBRANE_REPOLARIZATION	34	0.478975	1.24005	0.185567	0.276823	1	2387	tags=29%, list=16%, signal=35%
GOBP_POSITIVE_REGULATION_OF_GLIOGENESIS	GOBP_POSITIVE_REGULATION_OF_GLIOGENESIS	59	0.427011	1.23956	0.178423	0.277268	1	3737	tags=36%, list=24%, signal=47%
GOBP_REGULATION_OF_MORPHOGENESIS_OF_AN_EPITHELIUM	GOBP_REGULATION_OF_MORPHOGENESIS_OF_AN_EPITHELIUM	61	0.455711	1.23891	0.156977	0.277987	1	3136	tags=34%, list=20%, signal=43%
GOBP_NEGATIVE_REGULATION_OF_FATTY_ACID_METABOLIC_PROCESS	GOBP_NEGATIVE_REGULATION_OF_FATTY_ACID_METABOLIC_PROCESS	27	0.41059	1.23854	0.16537	0.278292	1	4607	tags=41%, list=30%, signal=58%
GOBP_REGULATION_OF_COAGULATION	GOBP_REGULATION_OF_COAGULATION	68	0.465349	1.23843	0.15	0.278279	1	3111	tags=46%, list=20%, signal=57%
GOBP_RESPONSE_TO_PROGESTERONE	GOBP_RESPONSE_TO_PROGESTERONE	38	0.422689	1.23838	0.1341	0.278193	1	4437	tags=39%, list=29%, signal=55%
GOBP_NUCLEOBASE_CONTAINING_SMALL_MOLECULE_CATABOLIC_PROCESS	GOBP_NUCLEOBASE_CONTAINING_SMALL_MOLECULE_CATABOLIC_PROCESS	28	0.466463	1.23798	0.176817	0.278597	1	4327	tags=46%, list=28%, signal=65%
GOBP_SMAD_PROTEIN_SIGNAL_TRANSDUCTION	GOBP_SMAD_PROTEIN_SIGNAL_TRANSDUCTION	80	0.410956	1.2378	0.136364	0.278694	1	3417	tags=39%, list=22%, signal=50%
GOBP_THIOESTER_METABOLIC_PROCESS	GOBP_THIOESTER_METABOLIC_PROCESS	80	0.340274	1.23745	0.146825	0.278998	1	4245	tags=28%, list=28%, signal=38%
GOBP_INTEGRIN_ACTIVATION	GOBP_INTEGRIN_ACTIVATION	26	0.508797	1.23743	0.20202	0.278864	1	2661	tags=42%, list=17%, signal=51%
GOBP_CELLULAR_COMPONENT_MAINTENANCE	GOBP_CELLULAR_COMPONENT_MAINTENANCE	56	0.38564	1.23677	0.140496	0.27956	1	2083	tags=20%, list=14%, signal=23%
GOBP_NEGATIVE_REGULATION_OF_RESPONSE_TO_WOUNDING	GOBP_NEGATIVE_REGULATION_OF_RESPONSE_TO_WOUNDING	85	0.454766	1.23662	0.153535	0.279618	1	3142	tags=41%, list=20%, signal=51%
GOBP_NEGATIVE_REGULATION_OF_COLD_INDUCED_THERMOGENESIS	GOBP_NEGATIVE_REGULATION_OF_COLD_INDUCED_THERMOGENESIS	45	0.391258	1.23628	0.200846	0.279894	1	2931	tags=27%, list=19%, signal=33%
GOBP_NON_CANONICAL_WNT_SIGNALING_PATHWAY	GOBP_NON_CANONICAL_WNT_SIGNALING_PATHWAY	70	0.424586	1.23592	0.162698	0.280217	1	3417	tags=34%, list=22%, signal=44%
GOBP_VITAMIN_TRANSMEMBRANE_TRANSPORT	GOBP_VITAMIN_TRANSMEMBRANE_TRANSPORT	19	0.506319	1.23581	0.193738	0.280202	1	3644	tags=37%, list=24%, signal=48%
GOBP_RESPONSE_TO_LEAD_ION	GOBP_RESPONSE_TO_LEAD_ION	20	0.463462	1.23567	0.218814	0.28024	1	5699	tags=60%, list=37%, signal=95%
GOBP_NEGATIVE_REGULATION_OF_INTRACELLULAR_STEROID_HORMONE_RECEPTOR_SIGNALING_PATHWAY	GOBP_NEGATIVE_REGULATION_OF_INTRACELLULAR_STEROID_HORMONE_RECEPTOR_SIGNALING_PATHWAY	36	0.390124	1.2353	0.176471	0.280591	1	4073	tags=31%, list=27%, signal=41%
GOBP_INORGANIC_ION_IMPORT_ACROSS_PLASMA_MEMBRANE	GOBP_INORGANIC_ION_IMPORT_ACROSS_PLASMA_MEMBRANE	97	0.393045	1.23519	0.120968	0.280579	1	4472	tags=41%, list=29%, signal=58%
GOBP_RESPONSE_TO_EXTRACELLULAR_STIMULUS	GOBP_RESPONSE_TO_EXTRACELLULAR_STIMULUS	440	0.315665	1.23492	0.0935551	0.280794	1	2864	tags=20%, list=19%, signal=24%
GOBP_REGULATION_OF_STEROID_HORMONE_SECRETION	GOBP_REGULATION_OF_STEROID_HORMONE_SECRETION	17	0.53614	1.23483	0.15098	0.280752	1	3207	tags=53%, list=21%, signal=67%
GOBP_NEGATIVE_REGULATION_OF_NEURON_APOPTOTIC_PROCESS	GOBP_NEGATIVE_REGULATION_OF_NEURON_APOPTOTIC_PROCESS	132	0.364224	1.23451	0.122047	0.281	1	3096	tags=28%, list=20%, signal=35%
GOBP_APOPTOTIC_PROCESS_INVOLVED_IN_DEVELOPMENT	GOBP_APOPTOTIC_PROCESS_INVOLVED_IN_DEVELOPMENT	36	0.442653	1.23441	0.164271	0.280983	1	2662	tags=31%, list=17%, signal=37%
GOBP_REGULATION_OF_GENERATION_OF_PRECURSOR_METABOLITES_AND_ENERGY	GOBP_REGULATION_OF_GENERATION_OF_PRECURSOR_METABOLITES_AND_ENERGY	117	0.289276	1.23439	0.108163	0.280873	1	2766	tags=17%, list=18%, signal=21%
[truncated: 1,377 more rows]

## Sheet: gsea_report_for_ImmCluster B
NAME	GS<br> follow link to MSigDB	SIZE	ES	NES	NOM p-val	FDR q-val	FWER p-val	RANK AT MAX	LEADING EDGE	Column1
HALLMARK_MYC_TARGETS_V1	HALLMARK_MYC_TARGETS_V1	187	-0.566719	-2.09221	0	0.00519795	0.011	4701	tags=59%, list=31%, signal=84%
HALLMARK_MYC_TARGETS_V2	HALLMARK_MYC_TARGETS_V2	58	-0.632515	-1.86775	0.011257	0.0208072	0.076	3359	tags=71%, list=22%, signal=90%
HALLMARK_G2M_CHECKPOINT	HALLMARK_G2M_CHECKPOINT	187	-0.707881	-1.70654	0.0117188	0.0571539	0.226	1782	tags=45%, list=12%, signal=50%
HALLMARK_E2F_TARGETS	HALLMARK_E2F_TARGETS	192	-0.706058	-1.70294	0.0116279	0.043576	0.227	1756	tags=45%, list=11%, signal=50%
HALLMARK_UNFOLDED_PROTEIN_RESPONSE	HALLMARK_UNFOLDED_PROTEIN_RESPONSE	105	-0.407298	-1.69421	0.0573614	0.0372829	0.241	4045	tags=45%, list=26%, signal=60%
HALLMARK_DNA_REPAIR	HALLMARK_DNA_REPAIR	133	-0.334549	-1.5965	0.0766283	0.0613194	0.386	4164	tags=47%, list=27%, signal=63%
HALLMARK_OXIDATIVE_PHOSPHORYLATION	HALLMARK_OXIDATIVE_PHOSPHORYLATION	181	-0.308292	-1.44579	0.150206	0.124413	0.614	5113	tags=50%, list=33%, signal=74%
HALLMARK_MTORC1_SIGNALING	HALLMARK_MTORC1_SIGNALING	192	-0.373708	-1.4192	0.134766	0.124862	0.657	2570	tags=34%, list=17%, signal=40%
HALLMARK_MITOTIC_SPINDLE	HALLMARK_MITOTIC_SPINDLE	194	-0.372823	-1.35248	0.1875	0.155509	0.757	1465	tags=18%, list=10%, signal=20%
HALLMARK_GLYCOLYSIS	HALLMARK_GLYCOLYSIS	196	-0.366531	-1.32819	0.12766	0.156231	0.796	3645	tags=39%, list=24%, signal=51%
HALLMARK_SPERMATOGENESIS	HALLMARK_SPERMATOGENESIS	132	-0.36767	-1.06983	0.328629	0.368941	0.965	2728	tags=37%, list=18%, signal=45%
HALLMARK_PANCREAS_BETA_CELLS	HALLMARK_PANCREAS_BETA_CELLS	40	-0.330699	-0.804848	0.774127	0.686955	0.998	3397	tags=45%, list=22%, signal=58%
GOBP_RIBONUCLEOPROTEIN_COMPLEX_BIOGENESIS	GOBP_RIBONUCLEOPROTEIN_COMPLEX_BIOGENESIS	360	-0.486843	-2.32162	0	0.00987951	0.011	4972	tags=60%, list=32%, signal=86%
GOBP_MITOCHONDRIAL_GENE_EXPRESSION	GOBP_MITOCHONDRIAL_GENE_EXPRESSION	84	-0.635579	-2.31672	0	0.00493975	0.011	4268	tags=75%, list=28%, signal=103%
GOBP_NCRNA_PROCESSING	GOBP_NCRNA_PROCESSING	313	-0.492664	-2.28674	0	0.00450161	0.018	4573	tags=56%, list=30%, signal=78%
GOBP_RIBOSOME_BIOGENESIS	GOBP_RIBOSOME_BIOGENESIS	258	-0.523137	-2.28239	0	0.00345175	0.018	4448	tags=56%, list=29%, signal=78%
GOBP_TRNA_METABOLIC_PROCESS	GOBP_TRNA_METABOLIC_PROCESS	138	-0.522206	-2.26885	0.00196464	0.0027614	0.018	4260	tags=54%, list=28%, signal=75%
GOBP_RRNA_METABOLIC_PROCESS	GOBP_RRNA_METABOLIC_PROCESS	223	-0.504284	-2.26325	0	0.00269365	0.021	4448	tags=56%, list=29%, signal=77%
GOBP_MITOCHONDRIAL_TRANSLATION	GOBP_MITOCHONDRIAL_TRANSLATION	60	-0.664576	-2.25659	0	0.00239563	0.021	4380	tags=78%, list=29%, signal=109%
GOBP_NCRNA_METABOLIC_PROCESS	GOBP_NCRNA_METABOLIC_PROCESS	420	-0.45161	-2.18313	0	0.00427454	0.043	4591	tags=55%, list=30%, signal=76%
GOBP_MITOCHONDRIAL_RNA_METABOLIC_PROCESS	GOBP_MITOCHONDRIAL_RNA_METABOLIC_PROCESS	39	-0.623053	-2.10726	0.00207039	0.00937682	0.086	2906	tags=59%, list=19%, signal=73%
GOBP_PROTEIN_TRANSMEMBRANE_IMPORT_INTO_INTRACELLULAR_ORGANELLE	GOBP_PROTEIN_TRANSMEMBRANE_IMPORT_INTO_INTRACELLULAR_ORGANELLE	30	-0.616966	-2.08644	0.00208333	0.0100597	0.103	3415	tags=53%, list=22%, signal=68%
GOBP_REGULATION_OF_MITOCHONDRIAL_GENE_EXPRESSION	GOBP_REGULATION_OF_MITOCHONDRIAL_GENE_EXPRESSION	21	-0.650068	-2.08632	0.00202429	0.00914518	0.103	4268	tags=71%, list=28%, signal=99%
GOBP_TRNA_PROCESSING	GOBP_TRNA_PROCESSING	98	-0.501122	-2.06051	0.00607287	0.0106526	0.127	4692	tags=59%, list=31%, signal=85%
GOBP_MATURATION_OF_5_8S_RRNA	GOBP_MATURATION_OF_5_8S_RRNA	33	-0.631248	-2.04909	0.00199203	0.0117597	0.138	4448	tags=64%, list=29%, signal=89%
GOBP_RRNA_MODIFICATION	GOBP_RRNA_MODIFICATION	28	-0.610624	-2.04836	0.0041841	0.0110106	0.139	4939	tags=68%, list=32%, signal=100%
GOBP_RRNA_TRANSCRIPTION	GOBP_RRNA_TRANSCRIPTION	26	-0.566662	-2.04604	0.00393701	0.0103611	0.141	5098	tags=81%, list=33%, signal=121%
GOBP_RIBOSOMAL_LARGE_SUBUNIT_BIOGENESIS	GOBP_RIBOSOMAL_LARGE_SUBUNIT_BIOGENESIS	60	-0.584765	-2.03635	0.00207039	0.0108453	0.156	4959	tags=63%, list=32%, signal=93%
GOBP_RIBOSOMAL_SMALL_SUBUNIT_BIOGENESIS	GOBP_RIBOSOMAL_SMALL_SUBUNIT_BIOGENESIS	62	-0.545125	-2.03559	0.011976	0.0102435	0.158	4397	tags=58%, list=29%, signal=81%
GOBP_AMINO_ACID_ACTIVATION	GOBP_AMINO_ACID_ACTIVATION	24	-0.647408	-2.01581	0	0.0126358	0.192	2339	tags=46%, list=15%, signal=54%
GOBP_MATURATION_OF_SSU_RRNA_FROM_TRICISTRONIC_RRNA_TRANSCRIPT_SSU_RRNA_5_8S_RRNA_LSU_RRNA	GOBP_MATURATION_OF_SSU_RRNA_FROM_TRICISTRONIC_RRNA_TRANSCRIPT_SSU_RRNA_5_8S_RRNA_LSU_RRNA	31	-0.619125	-1.99867	0	0.0144391	0.226	4397	tags=68%, list=29%, signal=95%
GOBP_RIBONUCLEOPROTEIN_COMPLEX_SUBUNIT_ORGANIZATION	GOBP_RIBONUCLEOPROTEIN_COMPLEX_SUBUNIT_ORGANIZATION	157	-0.403949	-1.99375	0.010352	0.0148111	0.237	3851	tags=38%, list=25%, signal=50%
GOBP_MATURATION_OF_SSU_RRNA	GOBP_MATURATION_OF_SSU_RRNA	41	-0.572363	-1.99337	0.0120482	0.0141058	0.237	4397	tags=66%, list=29%, signal=92%
GOBP_MITOCHONDRIAL_RNA_PROCESSING	GOBP_MITOCHONDRIAL_RNA_PROCESSING	18	-0.674809	-1.97325	0	0.0169547	0.289	4057	tags=78%, list=26%, signal=106%
GOBP_RNA_3_END_PROCESSING	GOBP_RNA_3_END_PROCESSING	94	-0.427196	-1.96129	0.00414938	0.0187893	0.322	4541	tags=52%, list=30%, signal=74%
GOBP_NUCLEOBASE_BIOSYNTHETIC_PROCESS	GOBP_NUCLEOBASE_BIOSYNTHETIC_PROCESS	18	-0.760916	-1.96006	0	0.0182746	0.326	2672	tags=67%, list=17%, signal=81%
GOBP_DNA_STRAND_ELONGATION	GOBP_DNA_STRAND_ELONGATION	35	-0.68078	-1.95735	0	0.0179915	0.335	1937	tags=46%, list=13%, signal=52%
GOBP_INTRACELLULAR_PROTEIN_TRANSMEMBRANE_TRANSPORT	GOBP_INTRACELLULAR_PROTEIN_TRANSMEMBRANE_TRANSPORT	45	-0.47293	-1.9523	0.00390625	0.0183413	0.354	3415	tags=42%, list=22%, signal=54%
GOBP_PSEUDOURIDINE_SYNTHESIS	GOBP_PSEUDOURIDINE_SYNTHESIS	17	-0.665253	-1.94369	0.00195312	0.0192318	0.385	3942	tags=82%, list=26%, signal=111%
GOBP_CLEAVAGE_INVOLVED_IN_RRNA_PROCESSING	GOBP_CLEAVAGE_INVOLVED_IN_RRNA_PROCESSING	26	-0.610865	-1.93485	0.00811359	0.0202749	0.413	4939	tags=69%, list=32%, signal=102%
GOBP_MATURATION_OF_5_8S_RRNA_FROM_TRICISTRONIC_RRNA_TRANSCRIPT_SSU_RRNA_5_8S_RRNA_LSU_RRNA	GOBP_MATURATION_OF_5_8S_RRNA_FROM_TRICISTRONIC_RRNA_TRANSCRIPT_SSU_RRNA_5_8S_RRNA_LSU_RRNA	23	-0.646826	-1.92501	0	0.0219191	0.443	3660	tags=57%, list=24%, signal=74%
GOBP_POSITIVE_REGULATION_OF_TELOMERASE_RNA_LOCALIZATION_TO_CAJAL_BODY	GOBP_POSITIVE_REGULATION_OF_TELOMERASE_RNA_LOCALIZATION_TO_CAJAL_BODY	15	-0.716248	-1.89836	0	0.0290662	0.533	3194	tags=73%, list=21%, signal=93%
GOBP_NCRNA_3_END_PROCESSING	GOBP_NCRNA_3_END_PROCESSING	34	-0.522543	-1.8939	0.0142857	0.0294895	0.541	4712	tags=59%, list=31%, signal=85%
GOBP_NEGATIVE_REGULATION_OF_DNA_REPLICATION	GOBP_NEGATIVE_REGULATION_OF_DNA_REPLICATION	29	-0.693387	-1.88681	0.00203252	0.0304626	0.561	2002	tags=48%, list=13%, signal=55%
GOBP_TELOMERASE_RNA_LOCALIZATION	GOBP_TELOMERASE_RNA_LOCALIZATION	19	-0.614613	-1.87509	0.00821355	0.0333623	0.59	3194	tags=63%, list=21%, signal=80%
GOBP_RIBOSOME_ASSEMBLY	GOBP_RIBOSOME_ASSEMBLY	51	-0.505457	-1.87471	0.0166667	0.0324936	0.592	5100	tags=57%, list=33%, signal=85%
GOBP_RRNA_CATABOLIC_PROCESS	GOBP_RRNA_CATABOLIC_PROCESS	19	-0.605032	-1.87197	0.00201613	0.0324513	0.606	2362	tags=37%, list=15%, signal=43%
GOBP_MATURATION_OF_LSU_RRNA	GOBP_MATURATION_OF_LSU_RRNA	23	-0.634159	-1.87055	0.00619835	0.0320985	0.612	3842	tags=57%, list=25%, signal=75%
GOBP_SPLICEOSOMAL_SNRNP_ASSEMBLY	GOBP_SPLICEOSOMAL_SNRNP_ASSEMBLY	32	-0.561335	-1.86171	0.00631579	0.0339481	0.64	4835	tags=66%, list=31%, signal=96%
GOBP_BASE_EXCISION_REPAIR	GOBP_BASE_EXCISION_REPAIR	41	-0.587952	-1.857	0.00421941	0.0351744	0.657	2934	tags=46%, list=19%, signal=57%
GOBP_ESTABLISHMENT_OF_PROTEIN_LOCALIZATION_TO_CHROMOSOME	GOBP_ESTABLISHMENT_OF_PROTEIN_LOCALIZATION_TO_CHROMOSOME	20	-0.644356	-1.85251	0.0139165	0.0358254	0.67	4015	tags=75%, list=26%, signal=101%
GOBP_NCRNA_TRANSCRIPTION	GOBP_NCRNA_TRANSCRIPTION	46	-0.45075	-1.82862	0.020202	0.0433422	0.733	5098	tags=65%, list=33%, signal=97%
GOBP_REGULATION_OF_DNA_STRAND_ELONGATION	GOBP_REGULATION_OF_DNA_STRAND_ELONGATION	16	-0.551016	-1.82694	0.015444	0.0430178	0.738	1937	tags=31%, list=13%, signal=36%
GOBP_TRNA_MODIFICATION	GOBP_TRNA_MODIFICATION	70	-0.467492	-1.82688	0.0242915	0.0420341	0.739	4214	tags=51%, list=27%, signal=71%
GOBP_CYTOKINETIC_PROCESS	GOBP_CYTOKINETIC_PROCESS	38	-0.605977	-1.82174	0.0143443	0.0431539	0.753	1489	tags=29%, list=10%, signal=32%
GOBP_MITOTIC_SPINDLE_ASSEMBLY	GOBP_MITOTIC_SPINDLE_ASSEMBLY	61	-0.643106	-1.82174	0.0139721	0.0421731	0.753	1598	tags=30%, list=10%, signal=33%
GOBP_RRNA_METHYLATION	GOBP_RRNA_METHYLATION	18	-0.569271	-1.80572	0.0315789	0.0474944	0.803	4889	tags=56%, list=32%, signal=81%
GOBP_HISTONE_EXCHANGE	GOBP_HISTONE_EXCHANGE	20	-0.716378	-1.8027	0	0.0478548	0.806	840	tags=30%, list=5%, signal=32%
GOBP_ESTABLISHMENT_OF_PROTEIN_LOCALIZATION_TO_TELOMERE	GOBP_ESTABLISHMENT_OF_PROTEIN_LOCALIZATION_TO_TELOMERE	16	-0.671132	-1.78693	0.0141414	0.0541806	0.851	3194	tags=69%, list=21%, signal=87%
GOBP_SISTER_CHROMATID_SEGREGATION	GOBP_SISTER_CHROMATID_SEGREGATION	179	-0.643633	-1.78374	0.0122699	0.0547501	0.86	1823	tags=38%, list=12%, signal=43%
GOBP_NUCLEAR_CHROMOSOME_SEGREGATION	GOBP_NUCLEAR_CHROMOSOME_SEGREGATION	237	-0.615858	-1.7794	0.0164609	0.0556001	0.867	1823	tags=35%, list=12%, signal=39%
GOBP_CHROMOSOME_SEGREGATION	GOBP_CHROMOSOME_SEGREGATION	293	-0.599822	-1.77916	0.0205761	0.0546332	0.867	1823	tags=34%, list=12%, signal=38%
GOBP_METAPHASE_PLATE_CONGRESSION	GOBP_METAPHASE_PLATE_CONGRESSION	61	-0.687377	-1.77766	0.0181087	0.0543138	0.871	1424	tags=34%, list=9%, signal=38%
GOBP_POSITIVE_REGULATION_OF_MRNA_SPLICING_VIA_SPLICEOSOME	GOBP_POSITIVE_REGULATION_OF_MRNA_SPLICING_VIA_SPLICEOSOME	22	-0.615785	-1.77447	0.0104384	0.0549702	0.881	3101	tags=41%, list=20%, signal=51%
GOBP_INNER_MITOCHONDRIAL_MEMBRANE_ORGANIZATION	GOBP_INNER_MITOCHONDRIAL_MEMBRANE_ORGANIZATION	30	-0.484415	-1.77048	0.044	0.0561074	0.888	3980	tags=57%, list=26%, signal=76%
GOBP_PROTEIN_K11_LINKED_UBIQUITINATION	GOBP_PROTEIN_K11_LINKED_UBIQUITINATION	27	-0.521821	-1.76945	0.0116732	0.0555238	0.889	1799	tags=22%, list=12%, signal=25%
GOBP_MITOTIC_METAPHASE_PLATE_CONGRESSION	GOBP_MITOTIC_METAPHASE_PLATE_CONGRESSION	49	-0.709955	-1.76403	0.022449	0.0572879	0.892	1823	tags=41%, list=12%, signal=46%
GOBP_MRNA_3_END_PROCESSING	GOBP_MRNA_3_END_PROCESSING	58	-0.367814	-1.76268	0.025641	0.0571154	0.895	4082	tags=45%, list=27%, signal=61%
GOBP_CHROMOSOME_LOCALIZATION	GOBP_CHROMOSOME_LOCALIZATION	75	-0.633943	-1.76213	0.0242915	0.0564697	0.896	1424	tags=29%, list=9%, signal=32%
GOBP_MITOTIC_SISTER_CHROMATID_SEGREGATION	GOBP_MITOTIC_SISTER_CHROMATID_SEGREGATION	155	-0.659664	-1.75844	0.0243408	0.0576047	0.907	1823	tags=40%, list=12%, signal=45%
GOBP_UBIQUITIN_DEPENDENT_PROTEIN_CATABOLIC_PROCESS_VIA_THE_MULTIVESICULAR_BODY_SORTING_PATHWAY	GOBP_UBIQUITIN_DEPENDENT_PROTEIN_CATABOLIC_PROCESS_VIA_THE_MULTIVESICULAR_BODY_SORTING_PATHWAY	30	-0.456532	-1.75769	0.0322581	0.0570488	0.907	4120	tags=43%, list=27%, signal=59%
GOBP_MITOTIC_SPINDLE_ORGANIZATION	GOBP_MITOTIC_SPINDLE_ORGANIZATION	110	-0.60062	-1.7576	0.0300601	0.0561308	0.907	1598	tags=32%, list=10%, signal=35%
GOBP_UBIQUINONE_METABOLIC_PROCESS	GOBP_UBIQUINONE_METABOLIC_PROCESS	16	-0.589184	-1.75718	0.0290456	0.0554311	0.907	2795	tags=44%, list=18%, signal=53%
GOBP_RNA_5_END_PROCESSING	GOBP_RNA_5_END_PROCESSING	18	-0.643752	-1.75182	0.0144033	0.0576029	0.92	4562	tags=78%, list=30%, signal=111%
GOBP_MULTIVESICULAR_BODY_ORGANIZATION	GOBP_MULTIVESICULAR_BODY_ORGANIZATION	29	-0.468827	-1.74655	0.0321932	0.059594	0.932	4120	tags=45%, list=27%, signal=61%
GOBP_RIBOSOMAL_LARGE_SUBUNIT_ASSEMBLY	GOBP_RIBOSOMAL_LARGE_SUBUNIT_ASSEMBLY	23	-0.564617	-1.73244	0.033264	0.0670161	0.949	1836	tags=30%, list=12%, signal=35%
GOBP_SNRNA_PROCESSING	GOBP_SNRNA_PROCESSING	22	-0.532214	-1.72978	0.0169133	0.067502	0.953	4712	tags=59%, list=31%, signal=85%
GOBP_DNA_REPAIR	GOBP_DNA_REPAIR	438	-0.432112	-1.72484	0.0247423	0.0695464	0.954	3193	tags=36%, list=21%, signal=45%
GOBP_REGULATION_OF_DNA_REPLICATION	GOBP_REGULATION_OF_DNA_REPLICATION	119	-0.519814	-1.72388	0.0265849	0.069132	0.954	2002	tags=34%, list=13%, signal=39%
GOBP_SPINDLE_ASSEMBLY	GOBP_SPINDLE_ASSEMBLY	107	-0.532368	-1.7238	0.0423387	0.0681642	0.954	1675	tags=24%, list=11%, signal=27%
GOBP_REGULATION_OF_CENTROSOME_CYCLE	GOBP_REGULATION_OF_CENTROSOME_CYCLE	46	-0.548706	-1.7215	0.0186722	0.068658	0.956	1754	tags=37%, list=11%, signal=42%
GOBP_SISTER_CHROMATID_COHESION	GOBP_SISTER_CHROMATID_COHESION	46	-0.625139	-1.71856	0.0260521	0.0694175	0.959	855	tags=24%, list=6%, signal=25%
GOBP_OLIGOSACCHARIDE_LIPID_INTERMEDIATE_BIOSYNTHETIC_PROCESS	GOBP_OLIGOSACCHARIDE_LIPID_INTERMEDIATE_BIOSYNTHETIC_PROCESS	16	-0.546748	-1.71795	0.0272374	0.0688656	0.959	5165	tags=63%, list=34%, signal=94%
GOBP_DNA_DEPENDENT_DNA_REPLICATION	GOBP_DNA_DEPENDENT_DNA_REPLICATION	138	-0.628839	-1.7179	0.0243902	0.0679206	0.959	2650	tags=51%, list=17%, signal=61%
GOBP_NUCLEOTIDE_SUGAR_METABOLIC_PROCESS	GOBP_NUCLEOTIDE_SUGAR_METABOLIC_PROCESS	30	-0.485431	-1.71345	0.0297619	0.0696968	0.96	2731	tags=43%, list=18%, signal=53%
GOBP_NUCLEUS_ORGANIZATION	GOBP_NUCLEUS_ORGANIZATION	124	-0.37154	-1.71308	0.01875	0.0690341	0.96	1440	tags=17%, list=9%, signal=19%
GOBP_POSITIVE_REGULATION_OF_CELL_CYCLE_G2_M_PHASE_TRANSITION	GOBP_POSITIVE_REGULATION_OF_CELL_CYCLE_G2_M_PHASE_TRANSITION	31	-0.660002	-1.70857	0.0182186	0.0708922	0.963	1230	tags=32%, list=8%, signal=35%
GOBP_DNA_GEOMETRIC_CHANGE	GOBP_DNA_GEOMETRIC_CHANGE	86	-0.612605	-1.70313	0.0308008	0.0734574	0.967	1712	tags=37%, list=11%, signal=42%
GOBP_MICROTUBULE_CYTOSKELETON_ORGANIZATION_INVOLVED_IN_MITOSIS	GOBP_MICROTUBULE_CYTOSKELETON_ORGANIZATION_INVOLVED_IN_MITOSIS	135	-0.550432	-1.69522	0.0591837	0.0780583	0.971	1945	tags=32%, list=13%, signal=36%
GOBP_REGULATION_OF_CHROMOSOME_ORGANIZATION	GOBP_REGULATION_OF_CHROMOSOME_ORGANIZATION	189	-0.474591	-1.693	0.034413	0.0785178	0.972	2327	tags=31%, list=15%, signal=36%
GOBP_DNA_REPLICATION	GOBP_DNA_REPLICATION	250	-0.512014	-1.68809	0.0286299	0.0810888	0.973	3196	tags=45%, list=21%, signal=56%
GOBP_DOUBLE_STRAND_BREAK_REPAIR	GOBP_DOUBLE_STRAND_BREAK_REPAIR	223	-0.478109	-1.68474	0.0462777	0.0824535	0.974	3192	tags=40%, list=21%, signal=50%
GOBP_REGULATION_OF_DNA_DEPENDENT_DNA_REPLICATION	GOBP_REGULATION_OF_DNA_DEPENDENT_DNA_REPLICATION	47	-0.690014	-1.68393	0.0165975	0.0820522	0.977	2723	tags=64%, list=18%, signal=77%
GOBP_REGULATION_OF_CHROMOSOME_SEGREGATION	GOBP_REGULATION_OF_CHROMOSOME_SEGREGATION	83	-0.65408	-1.68013	0.0302419	0.0839686	0.98	1823	tags=43%, list=12%, signal=49%
GOBP_MITOCHONDRIAL_RESPIRATORY_CHAIN_COMPLEX_ASSEMBLY	GOBP_MITOCHONDRIAL_RESPIRATORY_CHAIN_COMPLEX_ASSEMBLY	66	-0.420477	-1.67283	0.0750988	0.0883549	0.982	3959	tags=44%, list=26%, signal=59%
GOBP_CHROMOSOME_SEPARATION	GOBP_CHROMOSOME_SEPARATION	87	-0.628529	-1.6709	0.0397614	0.0887835	0.983	1823	tags=40%, list=12%, signal=45%
GOBP_MITOCHONDRIAL_TRANSMEMBRANE_TRANSPORT	GOBP_MITOCHONDRIAL_TRANSMEMBRANE_TRANSPORT	69	-0.405278	-1.66991	0.0317797	0.0885024	0.983	3130	tags=38%, list=20%, signal=47%
GOBP_MANNOSYLATION	GOBP_MANNOSYLATION	25	-0.50141	-1.66822	0.0281125	0.0887727	0.983	4715	tags=60%, list=31%, signal=86%
GOBP_SPINDLE_ORGANIZATION	GOBP_SPINDLE_ORGANIZATION	164	-0.508058	-1.66743	0.062753	0.0883507	0.983	1675	tags=26%, list=11%, signal=29%
GOBP_BINDING_OF_SPERM_TO_ZONA_PELLUCIDA	GOBP_BINDING_OF_SPERM_TO_ZONA_PELLUCIDA	36	-0.58994	-1.66544	0.0107759	0.0889229	0.984	3636	tags=53%, list=24%, signal=69%
GOBP_TETRAPYRROLE_BIOSYNTHETIC_PROCESS	GOBP_TETRAPYRROLE_BIOSYNTHETIC_PROCESS	32	-0.455683	-1.66406	0.035503	0.0889618	0.985	3250	tags=41%, list=21%, signal=51%
GOBP_NEGATIVE_REGULATION_OF_CHROMOSOME_ORGANIZATION	GOBP_NEGATIVE_REGULATION_OF_CHROMOSOME_ORGANIZATION	77	-0.589215	-1.66361	0.0490798	0.0883754	0.985	1823	tags=35%, list=12%, signal=40%
GOBP_ATTACHMENT_OF_SPINDLE_MICROTUBULES_TO_KINETOCHORE	GOBP_ATTACHMENT_OF_SPINDLE_MICROTUBULES_TO_KINETOCHORE	30	-0.765864	-1.66261	0.0221328	0.0880522	0.985	1325	tags=47%, list=9%, signal=51%
GOBP_DNA_REPLICATION_INDEPENDENT_CHROMATIN_ORGANIZATION	GOBP_DNA_REPLICATION_INDEPENDENT_CHROMATIN_ORGANIZATION	17	-0.704663	-1.66256	0.0198807	0.0871218	0.985	922	tags=35%, list=6%, signal=38%
GOBP_PROTEIN_LOCALIZATION_TO_CHROMOSOME_TELOMERIC_REGION	GOBP_PROTEIN_LOCALIZATION_TO_CHROMOSOME_TELOMERIC_REGION	28	-0.466531	-1.66043	0.0595238	0.0877674	0.986	3194	tags=46%, list=21%, signal=59%
GOBP_CENTROSOME_SEPARATION	GOBP_CENTROSOME_SEPARATION	15	-0.726471	-1.66026	0.0146751	0.0869819	0.986	879	tags=33%, list=6%, signal=35%
GOBP_SNRNA_METABOLIC_PROCESS	GOBP_SNRNA_METABOLIC_PROCESS	47	-0.405195	-1.65917	0.0373444	0.0869943	0.988	5045	tags=51%, list=33%, signal=76%
GOBP_TRANSCRIPTION_BY_RNA_POLYMERASE_I	GOBP_TRANSCRIPTION_BY_RNA_POLYMERASE_I	43	-0.410954	-1.65329	0.0546559	0.0907858	0.99	3058	tags=40%, list=20%, signal=49%
GOBP_RNA_EXPORT_FROM_NUCLEUS	GOBP_RNA_EXPORT_FROM_NUCLEUS	70	-0.342463	-1.65287	0.0426829	0.090279	0.99	4258	tags=43%, list=28%, signal=59%
GOBP_CELL_CYCLE_CHECKPOINT_SIGNALING	GOBP_CELL_CYCLE_CHECKPOINT_SIGNALING	149	-0.536973	-1.64238	0.0513347	0.0977565	0.991	1823	tags=31%, list=12%, signal=35%
GOBP_REGULATION_OF_CHROMOSOME_SEPARATION	GOBP_REGULATION_OF_CHROMOSOME_SEPARATION	68	-0.650753	-1.64008	0.0441767	0.0985872	0.993	1823	tags=46%, list=12%, signal=51%
GOBP_REGULATION_OF_SPINDLE_ORGANIZATION	GOBP_REGULATION_OF_SPINDLE_ORGANIZATION	41	-0.488351	-1.6389	0.0722892	0.0985059	0.993	2835	tags=32%, list=18%, signal=39%
GOBP_CYTOSKELETON_DEPENDENT_CYTOKINESIS	GOBP_CYTOSKELETON_DEPENDENT_CYTOKINESIS	82	-0.474269	-1.63642	0.0441767	0.0996019	0.993	1489	tags=23%, list=10%, signal=26%
GOBP_DNA_DOUBLE_STRAND_BREAK_PROCESSING	GOBP_DNA_DOUBLE_STRAND_BREAK_PROCESSING	16	-0.701044	-1.63597	0.0245902	0.0989649	0.993	947	tags=31%, list=6%, signal=33%
GOBP_SPLICEOSOMAL_COMPLEX_ASSEMBLY	GOBP_SPLICEOSOMAL_COMPLEX_ASSEMBLY	50	-0.42268	-1.63325	0.0442105	0.100345	0.994	3529	tags=44%, list=23%, signal=57%
GOBP_CELL_CYCLE_DNA_REPLICATION	GOBP_CELL_CYCLE_DNA_REPLICATION	39	-0.718061	-1.63303	0.0257937	0.0995126	0.994	1899	tags=56%, list=12%, signal=64%
GOBP_RECOMBINATIONAL_REPAIR	GOBP_RECOMBINATIONAL_REPAIR	132	-0.496719	-1.63284	0.0693069	0.0986946	0.994	3192	tags=42%, list=21%, signal=52%
GOBP_METAPHASE_ANAPHASE_TRANSITION_OF_CELL_CYCLE	GOBP_METAPHASE_ANAPHASE_TRANSITION_OF_CELL_CYCLE	62	-0.657584	-1.63018	0.036	0.0999301	0.994	1823	tags=45%, list=12%, signal=51%
GOBP_ORGANELLE_FISSION	GOBP_ORGANELLE_FISSION	423	-0.502757	-1.62649	0.0503018	0.102106	0.994	1858	tags=31%, list=12%, signal=34%
GOBP_REGULATION_OF_MITOTIC_SPINDLE_ASSEMBLY	GOBP_REGULATION_OF_MITOTIC_SPINDLE_ASSEMBLY	20	-0.557831	-1.62169	0.0470348	0.105272	0.995	2835	tags=35%, list=18%, signal=43%
GOBP_MEIOTIC_CELL_CYCLE_PROCESS	GOBP_MEIOTIC_CELL_CYCLE_PROCESS	167	-0.582252	-1.61886	0.0201613	0.106783	0.995	2661	tags=44%, list=17%, signal=52%
GOBP_DNA_STRAND_ELONGATION_INVOLVED_IN_DNA_REPLICATION	GOBP_DNA_STRAND_ELONGATION_INVOLVED_IN_DNA_REPLICATION	15	-0.770707	-1.61545	0.0122951	0.108825	0.997	1883	tags=67%, list=12%, signal=76%
GOBP_SNO_S_RNA_METABOLIC_PROCESS	GOBP_SNO_S_RNA_METABOLIC_PROCESS	15	-0.546118	-1.60682	0.0491159	0.115815	0.997	2304	tags=40%, list=15%, signal=47%
GOBP_MIDBODY_ABSCISSION	GOBP_MIDBODY_ABSCISSION	16	-0.591595	-1.60599	0.0430328	0.115534	0.997	2835	tags=38%, list=18%, signal=46%
GOBP_REGULATION_OF_CELL_CYCLE_G2_M_PHASE_TRANSITION	GOBP_REGULATION_OF_CELL_CYCLE_G2_M_PHASE_TRANSITION	92	-0.533814	-1.60353	0.0764588	0.116744	0.997	705	tags=22%, list=5%, signal=23%
GOBP_MEIOTIC_CELL_CYCLE	GOBP_MEIOTIC_CELL_CYCLE	220	-0.545218	-1.60313	0.0223577	0.116153	0.997	2661	tags=40%, list=17%, signal=47%
GOBP_MITOTIC_NUCLEAR_DIVISION	GOBP_MITOTIC_NUCLEAR_DIVISION	267	-0.527004	-1.60272	0.0838323	0.115507	0.997	1858	tags=33%, list=12%, signal=36%
GOBP_POSITIVE_REGULATION_OF_MITOTIC_CELL_CYCLE_PHASE_TRANSITION	GOBP_POSITIVE_REGULATION_OF_MITOTIC_CELL_CYCLE_PHASE_TRANSITION	87	-0.502963	-1.60178	0.0523139	0.115482	0.997	1445	tags=29%, list=9%, signal=32%
GOBP_REGULATION_OF_MITOCHONDRIAL_MEMBRANE_PERMEABILITY_INVOLVED_IN_APOPTOTIC_PROCESS	GOBP_REGULATION_OF_MITOCHONDRIAL_MEMBRANE_PERMEABILITY_INVOLVED_IN_APOPTOTIC_PROCESS	35	-0.434923	-1.60169	0.025641	0.11454	0.997	3573	tags=40%, list=23%, signal=52%
GOBP_NCRNA_CATABOLIC_PROCESS	GOBP_NCRNA_CATABOLIC_PROCESS	36	-0.444166	-1.59588	0.0435644	0.119041	0.997	2362	tags=28%, list=15%, signal=33%
GOBP_DNA_DEPENDENT_DNA_REPLICATION_MAINTENANCE_OF_FIDELITY	GOBP_DNA_DEPENDENT_DNA_REPLICATION_MAINTENANCE_OF_FIDELITY	36	-0.588978	-1.59581	0.0544747	0.118109	0.997	1883	tags=44%, list=12%, signal=51%
GOBP_REGULATION_OF_SPINDLE_ASSEMBLY	GOBP_REGULATION_OF_SPINDLE_ASSEMBLY	27	-0.508074	-1.59182	0.0653061	0.121031	0.997	1175	tags=19%, list=8%, signal=20%
GOBP_MITOTIC_CELL_CYCLE_CHECKPOINT_SIGNALING	GOBP_MITOTIC_CELL_CYCLE_CHECKPOINT_SIGNALING	113	-0.543603	-1.59125	0.067623	0.120516	0.997	1823	tags=32%, list=12%, signal=36%
GOBP_ANAPHASE_PROMOTING_COMPLEX_DEPENDENT_CATABOLIC_PROCESS	GOBP_ANAPHASE_PROMOTING_COMPLEX_DEPENDENT_CATABOLIC_PROCESS	16	-0.677617	-1.5904	0.0341151	0.12025	0.997	1799	tags=38%, list=12%, signal=42%
GOBP_SPERMATID_NUCLEUS_DIFFERENTIATION	GOBP_SPERMATID_NUCLEUS_DIFFERENTIATION	17	-0.631993	-1.5899	0.010101	0.119831	0.997	584	tags=18%, list=4%, signal=18%
GOBP_PYRIMIDINE_NUCLEOSIDE_MONOPHOSPHATE_BIOSYNTHETIC_PROCESS	GOBP_PYRIMIDINE_NUCLEOSIDE_MONOPHOSPHATE_BIOSYNTHETIC_PROCESS	15	-0.592036	-1.58922	0.0442656	0.119489	0.997	2050	tags=47%, list=13%, signal=54%
GOBP_MRNA_CLEAVAGE	GOBP_MRNA_CLEAVAGE	18	-0.447513	-1.58834	0.0436433	0.119452	0.998	4930	tags=72%, list=32%, signal=106%
GOBP_NEGATIVE_REGULATION_OF_METAPHASE_ANAPHASE_TRANSITION_OF_CELL_CYCLE	GOBP_NEGATIVE_REGULATION_OF_METAPHASE_ANAPHASE_TRANSITION_OF_CELL_CYCLE	40	-0.673254	-1.58615	0.0479042	0.120615	0.998	1994	tags=52%, list=13%, signal=60%
GOBP_TELOMERE_MAINTENANCE	GOBP_TELOMERE_MAINTENANCE	122	-0.378179	-1.5847	0.083499	0.121137	0.998	3194	tags=31%, list=21%, signal=39%
GOBP_ALDITOL_METABOLIC_PROCESS	GOBP_ALDITOL_METABOLIC_PROCESS	20	-0.643514	-1.57921	0.031185	0.125649	0.998	3616	tags=65%, list=24%, signal=85%
GOBP_PEPTIDYL_LYSINE_DIMETHYLATION	GOBP_PEPTIDYL_LYSINE_DIMETHYLATION	19	-0.513218	-1.57809	0.0609037	0.125769	0.998	1935	tags=21%, list=13%, signal=24%
GOBP_CHROMOSOME_CONDENSATION	GOBP_CHROMOSOME_CONDENSATION	32	-0.611596	-1.57519	0.06	0.127719	0.999	2848	tags=47%, list=19%, signal=57%
GOBP_DNA_CONFORMATION_CHANGE	GOBP_DNA_CONFORMATION_CHANGE	249	-0.423272	-1.57393	0.0770791	0.127985	0.999	3217	tags=36%, list=21%, signal=44%
GOBP_REGULATION_OF_SISTER_CHROMATID_COHESION	GOBP_REGULATION_OF_SISTER_CHROMATID_COHESION	16	-0.626235	-1.57325	0.0665362	0.127601	1	765	tags=25%, list=5%, signal=26%
GOBP_PROTEIN_LOCALIZATION_TO_CHROMOSOME_CENTROMERIC_REGION	GOBP_PROTEIN_LOCALIZATION_TO_CHROMOSOME_CENTROMERIC_REGION	21	-0.756013	-1.57189	0.0419162	0.128091	1	1823	tags=48%, list=12%, signal=54%
GOBP_TELOMERE_ORGANIZATION	GOBP_TELOMERE_ORGANIZATION	126	-0.375559	-1.57158	0.0838323	0.127443	1	3194	tags=31%, list=21%, signal=39%
GOBP_DNA_REPLICATION_CHECKPOINT_SIGNALING	GOBP_DNA_REPLICATION_CHECKPOINT_SIGNALING	16	-0.778284	-1.57086	0.0323887	0.127265	1	1048	tags=50%, list=7%, signal=54%
GOBP_MITOTIC_CYTOKINETIC_PROCESS	GOBP_MITOTIC_CYTOKINETIC_PROCESS	22	-0.519149	-1.57014	0.0776892	0.127075	1	1413	tags=23%, list=9%, signal=25%
GOBP_COENZYME_A_METABOLIC_PROCESS	GOBP_COENZYME_A_METABOLIC_PROCESS	17	-0.527118	-1.56967	0.0701403	0.12666	1	2873	tags=35%, list=19%, signal=43%
GOBP_RNA_METHYLATION	GOBP_RNA_METHYLATION	62	-0.36893	-1.56863	0.0769231	0.12683	1	4692	tags=45%, list=31%, signal=65%
GOBP_POSITIVE_REGULATION_OF_CELL_CYCLE_PHASE_TRANSITION	GOBP_POSITIVE_REGULATION_OF_CELL_CYCLE_PHASE_TRANSITION	106	-0.469998	-1.56764	0.0537849	0.126928	1	1445	tags=27%, list=9%, signal=30%
GOBP_RNA_DEPENDENT_DNA_BIOSYNTHETIC_PROCESS	GOBP_RNA_DEPENDENT_DNA_BIOSYNTHETIC_PROCESS	65	-0.339129	-1.56514	0.0848126	0.128489	1	3194	tags=29%, list=21%, signal=37%
GOBP_REGULATION_OF_MITOTIC_SISTER_CHROMATID_SEGREGATION	GOBP_REGULATION_OF_MITOTIC_SISTER_CHROMATID_SEGREGATION	43	-0.664549	-1.56248	0.0582329	0.130212	1	1994	tags=51%, list=13%, signal=59%
GOBP_CELL_CYCLE_G2_M_PHASE_TRANSITION	GOBP_CELL_CYCLE_G2_M_PHASE_TRANSITION	136	-0.487648	-1.56084	0.0730223	0.131025	1	2534	tags=35%, list=17%, signal=42%
GOBP_TRANSCRIPTION_BY_RNA_POLYMERASE_III	GOBP_TRANSCRIPTION_BY_RNA_POLYMERASE_III	49	-0.338227	-1.56047	0.0588235	0.130547	1	4164	tags=47%, list=27%, signal=64%
GOBP_CENTROSOME_DUPLICATION	GOBP_CENTROSOME_DUPLICATION	68	-0.464693	-1.55988	0.084507	0.130233	1	3212	tags=44%, list=21%, signal=56%
GOBP_DNA_INTEGRITY_CHECKPOINT_SIGNALING	GOBP_DNA_INTEGRITY_CHECKPOINT_SIGNALING	108	-0.486777	-1.55865	0.0806452	0.130622	1	1756	tags=27%, list=11%, signal=30%
GOBP_MEIOSIS_I_CELL_CYCLE_PROCESS	GOBP_MEIOSIS_I_CELL_CYCLE_PROCESS	104	-0.585186	-1.55849	0.0438247	0.129898	1	2620	tags=43%, list=17%, signal=52%
GOBP_NUCLEOSOME_MOBILIZATION	GOBP_NUCLEOSOME_MOBILIZATION	20	-0.458962	-1.55487	0.0748031	0.132689	1	1937	tags=25%, list=13%, signal=29%
GOBP_MEIOTIC_CHROMOSOME_SEGREGATION	GOBP_MEIOTIC_CHROMOSOME_SEGREGATION	70	-0.623785	-1.55269	0.0433884	0.134118	1	2620	tags=46%, list=17%, signal=55%
GOBP_DNA_REPLICATION_INITIATION	GOBP_DNA_REPLICATION_INITIATION	36	-0.679532	-1.55096	0.0521042	0.134967	1	2426	tags=58%, list=16%, signal=69%
GOBP_INTRA_GOLGI_VESICLE_MEDIATED_TRANSPORT	GOBP_INTRA_GOLGI_VESICLE_MEDIATED_TRANSPORT	29	-0.406665	-1.54984	0.0788955	0.135264	1	4344	tags=48%, list=28%, signal=67%
GOBP_NUCLEAR_MEMBRANE_REASSEMBLY	GOBP_NUCLEAR_MEMBRANE_REASSEMBLY	22	-0.458355	-1.54756	0.0791075	0.136573	1	4381	tags=55%, list=29%, signal=76%
GOBP_MITOTIC_G2_M_TRANSITION_CHECKPOINT	GOBP_MITOTIC_G2_M_TRANSITION_CHECKPOINT	37	-0.586452	-1.54693	0.0912779	0.136347	1	705	tags=24%, list=5%, signal=25%
GOBP_PROTEIN_DNA_COMPLEX_SUBUNIT_ORGANIZATION	GOBP_PROTEIN_DNA_COMPLEX_SUBUNIT_ORGANIZATION	162	-0.404233	-1.54565	0.0851927	0.136781	1	3195	tags=35%, list=21%, signal=43%
GOBP_MEIOTIC_CHROMOSOME_SEPARATION	GOBP_MEIOTIC_CHROMOSOME_SEPARATION	19	-0.691271	-1.54355	0.0497018	0.137984	1	357	tags=26%, list=2%, signal=27%
GOBP_MICROTUBULE_ORGANIZING_CENTER_ORGANIZATION	GOBP_MICROTUBULE_ORGANIZING_CENTER_ORGANIZATION	135	-0.40955	-1.5407	0.0682731	0.140021	1	1863	tags=25%, list=12%, signal=28%
GOBP_MITOCHONDRIAL_OUTER_MEMBRANE_PERMEABILIZATION_INVOLVED_IN_PROGRAMMED_CELL_DEATH	GOBP_MITOCHONDRIAL_OUTER_MEMBRANE_PERMEABILIZATION_INVOLVED_IN_PROGRAMMED_CELL_DEATH	32	-0.436333	-1.53995	0.0495049	0.139996	1	3323	tags=34%, list=22%, signal=44%
GOBP_NADPH_REGENERATION	GOBP_NADPH_REGENERATION	16	-0.570043	-1.53952	0.0535714	0.139534	1	4460	tags=75%, list=29%, signal=106%
GOBP_MITOCHONDRIAL_TRANSPORT	GOBP_MITOCHONDRIAL_TRANSPORT	157	-0.292094	-1.53523	0.0547945	0.142932	1	3675	tags=37%, list=24%, signal=48%
GOBP_REGULATION_OF_CENTRIOLE_REPLICATION	GOBP_REGULATION_OF_CENTRIOLE_REPLICATION	21	-0.572269	-1.5335	0.0736842	0.143913	1	1455	tags=43%, list=9%, signal=47%
GOBP_FEMALE_MEIOTIC_NUCLEAR_DIVISION	GOBP_FEMALE_MEIOTIC_NUCLEAR_DIVISION	23	-0.724764	-1.52948	0.0601202	0.147326	1	1603	tags=52%, list=10%, signal=58%
GOBP_HISTONE_MRNA_METABOLIC_PROCESS	GOBP_HISTONE_MRNA_METABOLIC_PROCESS	20	-0.456084	-1.52432	0.0853175	0.151883	1	2821	tags=45%, list=18%, signal=55%
GOBP_REGULATION_OF_DNA_REPAIR	GOBP_REGULATION_OF_DNA_REPAIR	124	-0.394695	-1.5215	0.0691824	0.154075	1	3266	tags=33%, list=21%, signal=42%
GOBP_ESTABLISHMENT_OF_PROTEIN_LOCALIZATION_TO_MITOCHONDRIAL_MEMBRANE	GOBP_ESTABLISHMENT_OF_PROTEIN_LOCALIZATION_TO_MITOCHONDRIAL_MEMBRANE	24	-0.445541	-1.52058	0.0941884	0.154077	1	4141	tags=46%, list=27%, signal=63%
GOBP_POSITIVE_REGULATION_OF_METAPHASE_ANAPHASE_TRANSITION_OF_CELL_CYCLE	GOBP_POSITIVE_REGULATION_OF_METAPHASE_ANAPHASE_TRANSITION_OF_CELL_CYCLE	16	-0.64509	-1.51941	0.0686071	0.154419	1	1767	tags=38%, list=12%, signal=42%
GOBP_CENTROMERE_COMPLEX_ASSEMBLY	GOBP_CENTROMERE_COMPLEX_ASSEMBLY	24	-0.80037	-1.5187	0.0433925	0.154256	1	1404	tags=58%, list=9%, signal=64%
GOBP_TRNA_METHYLATION	GOBP_TRNA_METHYLATION	32	-0.429604	-1.5163	0.0777311	0.15616	1	4049	tags=47%, list=26%, signal=64%
GOBP_NEGATIVE_REGULATION_OF_CELL_CYCLE_G2_M_PHASE_TRANSITION	GOBP_NEGATIVE_REGULATION_OF_CELL_CYCLE_G2_M_PHASE_TRANSITION	50	-0.517459	-1.51307	0.102204	0.158805	1	705	tags=22%, list=5%, signal=23%
GOBP_PROTEIN_LOCALIZATION_TO_CONDENSED_CHROMOSOME	GOBP_PROTEIN_LOCALIZATION_TO_CONDENSED_CHROMOSOME	15	-0.798242	-1.50969	0.0445344	0.161896	1	1823	tags=60%, list=12%, signal=68%
GOBP_POLYAMINE_METABOLIC_PROCESS	GOBP_POLYAMINE_METABOLIC_PROCESS	17	-0.51092	-1.50759	0.0819672	0.163325	1	1680	tags=24%, list=11%, signal=26%
GOBP_NEGATIVE_REGULATION_OF_DNA_REPAIR	GOBP_NEGATIVE_REGULATION_OF_DNA_REPAIR	26	-0.550344	-1.50391	0.0957854	0.166698	1	2737	tags=35%, list=18%, signal=42%
GOBP_MITOTIC_DNA_INTEGRITY_CHECKPOINT_SIGNALING	GOBP_MITOTIC_DNA_INTEGRITY_CHECKPOINT_SIGNALING	74	-0.472705	-1.50359	0.0921844	0.166126	1	1119	tags=23%, list=7%, signal=25%
GOBP_REGULATION_OF_CELL_CYCLE_CHECKPOINT	GOBP_REGULATION_OF_CELL_CYCLE_CHECKPOINT	30	-0.527745	-1.50204	0.0747475	0.166993	1	1994	tags=37%, list=13%, signal=42%
GOBP_NEGATIVE_REGULATION_OF_NUCLEAR_DIVISION	GOBP_NEGATIVE_REGULATION_OF_NUCLEAR_DIVISION	53	-0.611548	-1.49865	0.0736196	0.169955	1	2138	tags=49%, list=14%, signal=57%
GOBP_POSITIVE_REGULATION_OF_MITOTIC_CELL_CYCLE	GOBP_POSITIVE_REGULATION_OF_MITOTIC_CELL_CYCLE	115	-0.434003	-1.49802	0.0744467	0.169664	1	1859	tags=27%, list=12%, signal=30%
GOBP_PROTEIN_LOCALIZATION_TO_MITOCHONDRION	GOBP_PROTEIN_LOCALIZATION_TO_MITOCHONDRION	109	-0.302459	-1.49356	0.067623	0.174001	1	3613	tags=37%, list=24%, signal=48%
GOBP_MITOTIC_SISTER_CHROMATID_COHESION	GOBP_MITOTIC_SISTER_CHROMATID_COHESION	23	-0.526226	-1.49156	0.0933063	0.175511	1	816	tags=17%, list=5%, signal=18%
GOBP_VIRAL_BUDDING	GOBP_VIRAL_BUDDING	24	-0.419583	-1.49147	0.0994036	0.174641	1	4120	tags=46%, list=27%, signal=63%
GOBP_MITOTIC_CYTOKINESIS	GOBP_MITOTIC_CYTOKINESIS	68	-0.43943	-1.49005	0.116327	0.175465	1	1489	tags=24%, list=10%, signal=26%
GOBP_HOMOLOGOUS_RECOMBINATION	GOBP_HOMOLOGOUS_RECOMBINATION	48	-0.57307	-1.48984	0.0795918	0.174723	1	1730	tags=27%, list=11%, signal=30%
GOBP_DNA_UNWINDING_INVOLVED_IN_DNA_REPLICATION	GOBP_DNA_UNWINDING_INVOLVED_IN_DNA_REPLICATION	21	-0.71622	-1.48939	0.077381	0.174316	1	1612	tags=52%, list=10%, signal=58%
GOBP_CYTOKINESIS	GOBP_CYTOKINESIS	147	-0.402806	-1.48792	0.077381	0.175004	1	1489	tags=18%, list=10%, signal=20%
GOBP_REGULATION_OF_TELOMERE_MAINTENANCE_VIA_TELOMERE_LENGTHENING	GOBP_REGULATION_OF_TELOMERE_MAINTENANCE_VIA_TELOMERE_LENGTHENING	55	-0.341557	-1.4875	0.0988142	0.17455	1	3194	tags=31%, list=21%, signal=39%
GOBP_REGULATION_OF_DOUBLE_STRAND_BREAK_REPAIR	GOBP_REGULATION_OF_DOUBLE_STRAND_BREAK_REPAIR	87	-0.418124	-1.48434	0.0951417	0.177512	1	3192	tags=33%, list=21%, signal=42%
GOBP_PROTEIN_TARGETING_TO_MITOCHONDRION	GOBP_PROTEIN_TARGETING_TO_MITOCHONDRION	88	-0.300458	-1.48408	0.083499	0.176808	1	3613	tags=40%, list=24%, signal=52%
GOBP_MRNA_PROCESSING	GOBP_MRNA_PROCESSING	410	-0.239246	-1.48361	0.0901639	0.176417	1	3802	tags=29%, list=25%, signal=38%
GOBP_REGULATION_OF_UBIQUITIN_PROTEIN_TRANSFERASE_ACTIVITY	GOBP_REGULATION_OF_UBIQUITIN_PROTEIN_TRANSFERASE_ACTIVITY	53	-0.429005	-1.47755	0.0910973	0.183013	1	1230	tags=19%, list=8%, signal=20%
GOBP_POST_TRANSLATIONAL_PROTEIN_MODIFICATION	GOBP_POST_TRANSLATIONAL_PROTEIN_MODIFICATION	34	-0.409338	-1.47534	0.0860656	0.184708	1	1915	tags=18%, list=12%, signal=20%
GOBP_CHROMOSOME_ORGANIZATION_INVOLVED_IN_MEIOTIC_CELL_CYCLE	GOBP_CHROMOSOME_ORGANIZATION_INVOLVED_IN_MEIOTIC_CELL_CYCLE	53	-0.580155	-1.4726	0.054	0.187105	1	2651	tags=47%, list=17%, signal=57%
GOBP_NADH_DEHYDROGENASE_COMPLEX_ASSEMBLY	GOBP_NADH_DEHYDROGENASE_COMPLEX_ASSEMBLY	44	-0.400639	-1.47228	0.135922	0.186477	1	4399	tags=43%, list=29%, signal=60%
GOBP_POSITIVE_REGULATION_OF_CHROMOSOME_SEPARATION	GOBP_POSITIVE_REGULATION_OF_CHROMOSOME_SEPARATION	18	-0.591506	-1.47117	0.0882353	0.186859	1	1767	tags=33%, list=12%, signal=38%
GOBP_REPLICATION_FORK_PROCESSING	GOBP_REPLICATION_FORK_PROCESSING	28	-0.577257	-1.46908	0.0907298	0.188584	1	1883	tags=39%, list=12%, signal=45%
GOBP_RNA_SPLICING_VIA_TRANSESTERIFICATION_REACTIONS	GOBP_RNA_SPLICING_VIA_TRANSESTERIFICATION_REACTIONS	264	-0.247366	-1.46557	0.122449	0.192042	1	4627	tags=34%, list=30%, signal=48%
GOBP_NUCLEAR_ENVELOPE_ORGANIZATION	GOBP_NUCLEAR_ENVELOPE_ORGANIZATION	54	-0.340626	-1.46546	0.0980392	0.191178	1	1311	tags=17%, list=9%, signal=18%
GOBP_HISTONE_H3_K9_TRIMETHYLATION	GOBP_HISTONE_H3_K9_TRIMETHYLATION	17	-0.477181	-1.46342	0.0897959	0.192874	1	1302	tags=24%, list=8%, signal=26%
GOBP_GLUTAMINE_METABOLIC_PROCESS	GOBP_GLUTAMINE_METABOLIC_PROCESS	21	-0.585144	-1.45873	0.05	0.197913	1	2672	tags=52%, list=17%, signal=63%
GOBP_POSTREPLICATION_REPAIR	GOBP_POSTREPLICATION_REPAIR	29	-0.430924	-1.45627	0.106931	0.200163	1	2650	tags=34%, list=17%, signal=42%
GOBP_TETRAHYDROFOLATE_METABOLIC_PROCESS	GOBP_TETRAHYDROFOLATE_METABOLIC_PROCESS	17	-0.552245	-1.45524	0.0758483	0.200513	1	3293	tags=71%, list=21%, signal=90%
GOBP_MITOTIC_CELL_CYCLE_PHASE_TRANSITION	GOBP_MITOTIC_CELL_CYCLE_PHASE_TRANSITION	383	-0.385468	-1.45499	0.12	0.199851	1	1446	tags=22%, list=9%, signal=24%
GOBP_MONOUBIQUITINATED_PROTEIN_DEUBIQUITINATION	GOBP_MONOUBIQUITINATED_PROTEIN_DEUBIQUITINATION	31	-0.343389	-1.45405	0.0808679	0.200041	1	3948	tags=39%, list=26%, signal=52%
GOBP_KINETOCHORE_ORGANIZATION	GOBP_KINETOCHORE_ORGANIZATION	19	-0.817243	-1.45347	0.0596421	0.199732	1	1724	tags=68%, list=11%, signal=77%
GOBP_REGULATION_OF_DOUBLE_STRAND_BREAK_REPAIR_VIA_HOMOLOGOUS_RECOMBINATION	GOBP_REGULATION_OF_DOUBLE_STRAND_BREAK_REPAIR_VIA_HOMOLOGOUS_RECOMBINATION	57	-0.44923	-1.45113	0.119433	0.201824	1	3192	tags=35%, list=21%, signal=44%
GOBP_PROTEIN_LOCALIZATION_TO_CHROMOSOME	GOBP_PROTEIN_LOCALIZATION_TO_CHROMOSOME	78	-0.467876	-1.44745	0.130612	0.205803	1	3194	tags=42%, list=21%, signal=53%
GOBP_INTERSTRAND_CROSS_LINK_REPAIR	GOBP_INTERSTRAND_CROSS_LINK_REPAIR	24	-0.553072	-1.44684	0.123457	0.205568	1	3185	tags=46%, list=21%, signal=58%
GOBP_NUCLEOTIDE_SUGAR_BIOSYNTHETIC_PROCESS	GOBP_NUCLEOTIDE_SUGAR_BIOSYNTHETIC_PROCESS	15	-0.489562	-1.44567	0.112205	0.206117	1	2632	tags=47%, list=17%, signal=56%
GOBP_RNA_LOCALIZATION	GOBP_RNA_LOCALIZATION	171	-0.281471	-1.44458	0.0978723	0.206559	1	4258	tags=42%, list=28%, signal=58%
GOBP_POSITIVE_REGULATION_OF_DNA_REPAIR	GOBP_POSITIVE_REGULATION_OF_DNA_REPAIR	77	-0.369727	-1.43682	0.0890688	0.216124	1	3489	tags=34%, list=23%, signal=43%
GOBP_PROTEIN_DNA_COMPLEX_ASSEMBLY	GOBP_PROTEIN_DNA_COMPLEX_ASSEMBLY	112	-0.427659	-1.43559	0.1423	0.216712	1	1574	tags=24%, list=10%, signal=27%
GOBP_REGULATION_OF_UBIQUITIN_PROTEIN_LIGASE_ACTIVITY	GOBP_REGULATION_OF_UBIQUITIN_PROTEIN_LIGASE_ACTIVITY	24	-0.578451	-1.43537	0.11134	0.21598	1	1603	tags=33%, list=10%, signal=37%
GOBP_REGULATION_OF_MITOTIC_CELL_CYCLE_PHASE_TRANSITION	GOBP_REGULATION_OF_MITOTIC_CELL_CYCLE_PHASE_TRANSITION	272	-0.397052	-1.43193	0.129482	0.21974	1	1446	tags=22%, list=9%, signal=24%
GOBP_REGULATION_OF_MEIOTIC_CELL_CYCLE	GOBP_REGULATION_OF_MEIOTIC_CELL_CYCLE	46	-0.565744	-1.4281	0.0583333	0.223959	1	2352	tags=39%, list=15%, signal=46%
GOBP_NEGATIVE_REGULATION_OF_RNA_SPLICING	GOBP_NEGATIVE_REGULATION_OF_RNA_SPLICING	24	-0.401579	-1.42559	0.115226	0.226415	1	4265	tags=38%, list=28%, signal=52%
GOBP_MITOCHONDRIAL_MEMBRANE_ORGANIZATION	GOBP_MITOCHONDRIAL_MEMBRANE_ORGANIZATION	93	-0.300809	-1.42469	0.110204	0.226607	1	4141	tags=45%, list=27%, signal=61%
GOBP_CYTOCHROME_COMPLEX_ASSEMBLY	GOBP_CYTOCHROME_COMPLEX_ASSEMBLY	20	-0.424264	-1.42404	0.118367	0.226455	1	2766	tags=40%, list=18%, signal=49%
GOBP_NEGATIVE_REGULATION_OF_PROTEASOMAL_UBIQUITIN_DEPENDENT_PROTEIN_CATABOLIC_PROCESS	GOBP_NEGATIVE_REGULATION_OF_PROTEASOMAL_UBIQUITIN_DEPENDENT_PROTEIN_CATABOLIC_PROCESS	30	-0.338995	-1.42248	0.0975143	0.22761	1	712	tags=7%, list=5%, signal=7%
GOBP_POSITIVE_REGULATION_OF_DOUBLE_STRAND_BREAK_REPAIR	GOBP_POSITIVE_REGULATION_OF_DOUBLE_STRAND_BREAK_REPAIR	51	-0.382319	-1.41776	0.116732	0.233175	1	3192	tags=31%, list=21%, signal=39%
GOBP_PROTEIN_MANNOSYLATION	GOBP_PROTEIN_MANNOSYLATION	15	-0.538169	-1.41648	0.0989691	0.234061	1	4633	tags=67%, list=30%, signal=95%
GOBP_POSITIVE_REGULATION_OF_CHROMOSOME_ORGANIZATION	GOBP_POSITIVE_REGULATION_OF_CHROMOSOME_ORGANIZATION	78	-0.33471	-1.41517	0.145914	0.234818	1	3194	tags=32%, list=21%, signal=40%
GOBP_POSITIVE_REGULATION_OF_MRNA_PROCESSING	GOBP_POSITIVE_REGULATION_OF_MRNA_PROCESSING	31	-0.418349	-1.41461	0.108607	0.23457	1	3327	tags=39%, list=22%, signal=49%
GOBP_SPINDLE_LOCALIZATION	GOBP_SPINDLE_LOCALIZATION	51	-0.443269	-1.41353	0.0817996	0.23506	1	1823	tags=24%, list=12%, signal=27%
GOBP_POSITIVE_REGULATION_OF_UBIQUITIN_PROTEIN_TRANSFERASE_ACTIVITY	GOBP_POSITIVE_REGULATION_OF_UBIQUITIN_PROTEIN_TRANSFERASE_ACTIVITY	29	-0.465257	-1.41121	0.123667	0.237308	1	998	tags=21%, list=6%, signal=22%
GOBP_CELL_CYCLE_PHASE_TRANSITION	GOBP_CELL_CYCLE_PHASE_TRANSITION	465	-0.368028	-1.4056	0.133745	0.244408	1	1823	tags=24%, list=12%, signal=26%
GOBP_REGULATION_OF_CYTOKINESIS	GOBP_REGULATION_OF_CYTOKINESIS	82	-0.441616	-1.40543	0.129098	0.243589	1	600	tags=16%, list=4%, signal=16%
GOBP_REGULATION_OF_CELL_CYCLE_PHASE_TRANSITION	GOBP_REGULATION_OF_CELL_CYCLE_PHASE_TRANSITION	350	-0.382849	-1.40497	0.132231	0.243149	1	1767	tags=24%, list=12%, signal=27%
GOBP_HOMOLOGOUS_CHROMOSOME_SEGREGATION	GOBP_HOMOLOGOUS_CHROMOSOME_SEGREGATION	44	-0.572205	-1.40239	0.0814664	0.246022	1	2620	tags=48%, list=17%, signal=57%
GOBP_RNA_POLYADENYLATION	GOBP_RNA_POLYADENYLATION	43	-0.315609	-1.3982	0.112474	0.250976	1	3921	tags=42%, list=26%, signal=56%
GOBP_MITOTIC_G2_DNA_DAMAGE_CHECKPOINT_SIGNALING	GOBP_MITOTIC_G2_DNA_DAMAGE_CHECKPOINT_SIGNALING	28	-0.550559	-1.39471	0.163636	0.254914	1	705	tags=25%, list=5%, signal=26%
GOBP_MITOTIC_INTRA_S_DNA_DAMAGE_CHECKPOINT_SIGNALING	GOBP_MITOTIC_INTRA_S_DNA_DAMAGE_CHECKPOINT_SIGNALING	16	-0.56964	-1.39354	0.132653	0.255531	1	1119	tags=31%, list=7%, signal=34%
GOBP_RNA_PHOSPHODIESTER_BOND_HYDROLYSIS_ENDONUCLEOLYTIC	GOBP_RNA_PHOSPHODIESTER_BOND_HYDROLYSIS_ENDONUCLEOLYTIC	66	-0.354743	-1.39329	0.0907173	0.254748	1	3070	tags=41%, list=20%, signal=51%
GOBP_NEGATIVE_REGULATION_OF_CELL_CYCLE_PHASE_TRANSITION	GOBP_NEGATIVE_REGULATION_OF_CELL_CYCLE_PHASE_TRANSITION	209	-0.394402	-1.39152	0.148594	0.256361	1	1758	tags=25%, list=11%, signal=28%
GOBP_POSITIVE_REGULATION_OF_DOUBLE_STRAND_BREAK_REPAIR_VIA_HOMOLOGOUS_RECOMBINATION	GOBP_POSITIVE_REGULATION_OF_DOUBLE_STRAND_BREAK_REPAIR_VIA_HOMOLOGOUS_RECOMBINATION	33	-0.41105	-1.39146	0.139579	0.255331	1	3489	tags=36%, list=23%, signal=47%
GOBP_RNA_PHOSPHODIESTER_BOND_HYDROLYSIS	GOBP_RNA_PHOSPHODIESTER_BOND_HYDROLYSIS	128	-0.291605	-1.38896	0.10387	0.257936	1	3399	tags=38%, list=22%, signal=48%
GOBP_NEGATIVE_REGULATION_OF_MEIOTIC_CELL_CYCLE	GOBP_NEGATIVE_REGULATION_OF_MEIOTIC_CELL_CYCLE	16	-0.628553	-1.38755	0.0840164	0.258899	1	2138	tags=56%, list=14%, signal=65%
GOBP_NUCLEOTIDE_EXCISION_REPAIR	GOBP_NUCLEOTIDE_EXCISION_REPAIR	54	-0.354349	-1.38635	0.124236	0.259546	1	2941	tags=37%, list=19%, signal=46%
GOBP_POLYOL_CATABOLIC_PROCESS	GOBP_POLYOL_CATABOLIC_PROCESS	24	-0.454251	-1.38336	0.08125	0.263013	1	2599	tags=46%, list=17%, signal=55%
GOBP_BLASTOCYST_GROWTH	GOBP_BLASTOCYST_GROWTH	18	-0.615234	-1.38259	0.144033	0.263133	1	1641	tags=33%, list=11%, signal=37%
GOBP_NEGATIVE_REGULATION_OF_CELL_CYCLE_PROCESS	GOBP_NEGATIVE_REGULATION_OF_CELL_CYCLE_PROCESS	249	-0.393828	-1.38116	0.138493	0.264049	1	1858	tags=26%, list=12%, signal=29%
GOBP_GONADOTROPIN_SECRETION	GOBP_GONADOTROPIN_SECRETION	15	-0.642583	-1.38106	0.0549898	0.263092	1	1300	tags=33%, list=8%, signal=36%
GOBP_NEGATIVE_REGULATION_OF_MRNA_PROCESSING	GOBP_NEGATIVE_REGULATION_OF_MRNA_PROCESSING	27	-0.362883	-1.37846	0.135628	0.265974	1	9795	tags=100%, list=64%, signal=276%
GOBP_LATE_ENDOSOME_TO_VACUOLE_TRANSPORT	GOBP_LATE_ENDOSOME_TO_VACUOLE_TRANSPORT	23	-0.373129	-1.37705	0.149312	0.266979	1	4120	tags=39%, list=27%, signal=53%
GOBP_MRNA_CIS_SPLICING_VIA_SPLICEOSOME	GOBP_MRNA_CIS_SPLICING_VIA_SPLICEOSOME	22	-0.405624	-1.37579	0.129363	0.267707	1	5575	tags=59%, list=36%, signal=93%
GOBP_TRANSLATIONAL_INITIATION	GOBP_TRANSLATIONAL_INITIATION	106	-0.243063	-1.37457	0.160156	0.268561	1	3529	tags=31%, list=23%, signal=40%
GOBP_REGULATION_OF_MITOTIC_CELL_CYCLE_SPINDLE_ASSEMBLY_CHECKPOINT	GOBP_REGULATION_OF_MITOTIC_CELL_CYCLE_SPINDLE_ASSEMBLY_CHECKPOINT	16	-0.584469	-1.37348	0.135081	0.269171	1	1994	tags=50%, list=13%, signal=57%
GOBP_TELOMERE_MAINTENANCE_VIA_TELOMERE_LENGTHENING	GOBP_TELOMERE_MAINTENANCE_VIA_TELOMERE_LENGTHENING	73	-0.295789	-1.37251	0.142857	0.269559	1	3194	tags=27%, list=21%, signal=34%
GOBP_POSITIVE_REGULATION_OF_MITOCHONDRIAL_FISSION	GOBP_POSITIVE_REGULATION_OF_MITOCHONDRIAL_FISSION	17	-0.422698	-1.37083	0.132937	0.27103	1	1613	tags=24%, list=11%, signal=26%
GOBP_TRANSCRIPTION_INITIATION_FROM_RNA_POLYMERASE_II_PROMOTER	GOBP_TRANSCRIPTION_INITIATION_FROM_RNA_POLYMERASE_II_PROMOTER	69	-0.301833	-1.36928	0.103175	0.272355	1	3377	tags=30%, list=22%, signal=39%
GOBP_DNA_TEMPLATED_TRANSCRIPTION_ELONGATION	GOBP_DNA_TEMPLATED_TRANSCRIPTION_ELONGATION	65	-0.274135	-1.36849	0.137255	0.27238	1	4229	tags=38%, list=28%, signal=53%
GOBP_NEURONAL_STEM_CELL_POPULATION_MAINTENANCE	GOBP_NEURONAL_STEM_CELL_POPULATION_MAINTENANCE	22	-0.539758	-1.3677	0.112903	0.2724	1	2620	tags=36%, list=17%, signal=44%
GOBP_MITOTIC_CHROMOSOME_CONDENSATION	GOBP_MITOTIC_CHROMOSOME_CONDENSATION	17	-0.606296	-1.36702	0.175238	0.272416	1	2081	tags=41%, list=14%, signal=48%
GOBP_HISTONE_H2A_ACETYLATION	GOBP_HISTONE_H2A_ACETYLATION	21	-0.383623	-1.36451	0.144603	0.275217	1	3489	tags=33%, list=23%, signal=43%
GOBP_NEGATIVE_REGULATION_OF_CELL_DIVISION	GOBP_NEGATIVE_REGULATION_OF_CELL_DIVISION	17	-0.632461	-1.36153	0.10166	0.278521	1	600	tags=41%, list=4%, signal=43%
GOBP_POSITIVE_REGULATION_OF_TELOMERE_MAINTENANCE_VIA_TELOMERE_LENGTHENING	GOBP_POSITIVE_REGULATION_OF_TELOMERE_MAINTENANCE_VIA_TELOMERE_LENGTHENING	36	-0.367869	-1.35745	0.142	0.283572	1	3448	tags=36%, list=22%, signal=46%
GOBP_NUCLEOSIDE_MONOPHOSPHATE_BIOSYNTHETIC_PROCESS	GOBP_NUCLEOSIDE_MONOPHOSPHATE_BIOSYNTHETIC_PROCESS	40	-0.407784	-1.3543	0.152778	0.287413	1	2419	tags=38%, list=16%, signal=44%
GOBP_REGULATION_OF_MITOTIC_CELL_CYCLE	GOBP_REGULATION_OF_MITOTIC_CELL_CYCLE	414	-0.355377	-1.35362	0.147705	0.287337	1	1859	tags=24%, list=12%, signal=26%
GOBP_REGULATION_OF_MEIOTIC_NUCLEAR_DIVISION	GOBP_REGULATION_OF_MEIOTIC_NUCLEAR_DIVISION	29	-0.562276	-1.35349	0.0708502	0.286422	1	2352	tags=45%, list=15%, signal=53%
GOBP_MICROTUBULE_ORGANIZING_CENTER_LOCALIZATION	GOBP_MICROTUBULE_ORGANIZING_CENTER_LOCALIZATION	29	-0.438404	-1.35059	0.143434	0.289869	1	343	tags=14%, list=2%, signal=14%
GOBP_PROTEIN_LOCALIZATION_TO_MICROTUBULE_ORGANIZING_CENTER	GOBP_PROTEIN_LOCALIZATION_TO_MICROTUBULE_ORGANIZING_CENTER	33	-0.368565	-1.35028	0.158215	0.289225	1	690	tags=9%, list=4%, signal=9%
GOBP_RNA_MODIFICATION	GOBP_RNA_MODIFICATION	133	-0.292339	-1.3486	0.154989	0.290725	1	4692	tags=47%, list=31%, signal=68%
GOBP_REGULATION_OF_NUCLEAR_DIVISION	GOBP_REGULATION_OF_NUCLEAR_DIVISION	130	-0.480745	-1.3464	0.141988	0.293055	1	1858	tags=35%, list=12%, signal=40%
GOBP_REGULATION_OF_TELOMERE_MAINTENANCE	GOBP_REGULATION_OF_TELOMERE_MAINTENANCE	72	-0.267937	-1.34484	0.15547	0.294409	1	3194	tags=25%, list=21%, signal=31%
GOBP_RNA_PHOSPHODIESTER_BOND_HYDROLYSIS_EXONUCLEOLYTIC	GOBP_RNA_PHOSPHODIESTER_BOND_HYDROLYSIS_EXONUCLEOLYTIC	39	-0.323894	-1.34246	0.167323	0.297095	1	4448	tags=41%, list=29%, signal=58%
GOBP_TELOMERE_MAINTENANCE_VIA_RECOMBINATION	GOBP_TELOMERE_MAINTENANCE_VIA_RECOMBINATION	15	-0.49088	-1.33886	0.191235	0.301789	1	3760	tags=47%, list=24%, signal=62%
GOBP_POSITIVE_REGULATION_OF_MEMBRANE_PERMEABILITY	GOBP_POSITIVE_REGULATION_OF_MEMBRANE_PERMEABILITY	39	-0.359841	-1.33873	0.125483	0.30085	1	2941	tags=33%, list=19%, signal=41%
GOBP_RNA_SPLICING	GOBP_RNA_SPLICING	356	-0.211985	-1.33677	0.160494	0.302858	1	4627	tags=34%, list=30%, signal=48%
GOBP_REGULATION_OF_HISTONE_H3_K9_METHYLATION	GOBP_REGULATION_OF_HISTONE_H3_K9_METHYLATION	24	-0.402687	-1.33392	0.136179	0.306363	1	705	tags=13%, list=5%, signal=13%
GOBP_HISTONE_DEUBIQUITINATION	GOBP_HISTONE_DEUBIQUITINATION	36	-0.3181	-1.33379	0.165631	0.305423	1	3948	tags=39%, list=26%, signal=52%
GOBP_POSITIVE_REGULATION_OF_CYCLIN_DEPENDENT_PROTEIN_KINASE_ACTIVITY	GOBP_POSITIVE_REGULATION_OF_CYCLIN_DEPENDENT_PROTEIN_KINASE_ACTIVITY	32	-0.432253	-1.32928	0.129666	0.31135	1	1627	tags=28%, list=11%, signal=31%
GOBP_DNA_PACKAGING	GOBP_DNA_PACKAGING	161	-0.326176	-1.32747	0.159274	0.313189	1	1157	tags=15%, list=8%, signal=16%
GOBP_POSITIVE_REGULATION_OF_CELL_CYCLE_PROCESS	GOBP_POSITIVE_REGULATION_OF_CELL_CYCLE_PROCESS	213	-0.397511	-1.32619	0.165306	0.314076	1	1859	tags=27%, list=12%, signal=30%
GOBP_GLYCOSYL_COMPOUND_BIOSYNTHETIC_PROCESS	GOBP_GLYCOSYL_COMPOUND_BIOSYNTHETIC_PROCESS	16	-0.459394	-1.32449	0.150198	0.315751	1	2467	tags=38%, list=16%, signal=45%
GOBP_PIGMENT_BIOSYNTHETIC_PROCESS	GOBP_PIGMENT_BIOSYNTHETIC_PROCESS	62	-0.353874	-1.32161	0.0800821	0.319472	1	2501	tags=34%, list=16%, signal=40%
GOBP_REGULATION_OF_MITOTIC_NUCLEAR_DIVISION	GOBP_REGULATION_OF_MITOTIC_NUCLEAR_DIVISION	105	-0.483474	-1.32127	0.186275	0.318845	1	1858	tags=37%, list=12%, signal=42%
GOBP_HOMOLOGOUS_CHROMOSOME_PAIRING_AT_MEIOSIS	GOBP_HOMOLOGOUS_CHROMOSOME_PAIRING_AT_MEIOSIS	37	-0.549829	-1.3198	0.112245	0.320006	1	2620	tags=46%, list=17%, signal=55%
GOBP_SERINE_FAMILY_AMINO_ACID_BIOSYNTHETIC_PROCESS	GOBP_SERINE_FAMILY_AMINO_ACID_BIOSYNTHETIC_PROCESS	15	-0.563439	-1.31795	0.170886	0.321838	1	2291	tags=47%, list=15%, signal=55%
GOBP_RIBONUCLEOSIDE_MONOPHOSPHATE_BIOSYNTHETIC_PROCESS	GOBP_RIBONUCLEOSIDE_MONOPHOSPHATE_BIOSYNTHETIC_PROCESS	32	-0.421494	-1.31585	0.164683	0.324168	1	2749	tags=41%, list=18%, signal=49%
GOBP_NEGATIVE_REGULATION_OF_MITOTIC_CELL_CYCLE	GOBP_NEGATIVE_REGULATION_OF_MITOTIC_CELL_CYCLE	191	-0.369144	-1.31315	0.169697	0.327439	1	1119	tags=20%, list=7%, signal=22%
GOBP_NEGATIVE_REGULATION_OF_UBIQUITIN_PROTEIN_TRANSFERASE_ACTIVITY	GOBP_NEGATIVE_REGULATION_OF_UBIQUITIN_PROTEIN_TRANSFERASE_ACTIVITY	22	-0.504582	-1.31172	0.17126	0.328678	1	1230	tags=23%, list=8%, signal=25%
GOBP_NEGATIVE_REGULATION_OF_MITOTIC_CELL_CYCLE_PHASE_TRANSITION	GOBP_NEGATIVE_REGULATION_OF_MITOTIC_CELL_CYCLE_PHASE_TRANSITION	147	-0.38792	-1.31141	0.203557	0.327985	1	1823	tags=26%, list=12%, signal=29%
GOBP_POSITIVE_REGULATION_OF_CELL_CYCLE	GOBP_POSITIVE_REGULATION_OF_CELL_CYCLE	288	-0.372288	-1.31135	0.153846	0.326901	1	1859	tags=26%, list=12%, signal=29%
GOBP_POSITIVE_REGULATION_OF_HISTONE_METHYLATION	GOBP_POSITIVE_REGULATION_OF_HISTONE_METHYLATION	41	-0.35563	-1.30948	0.165669	0.328784	1	1851	tags=17%, list=12%, signal=19%
GOBP_MITOTIC_RECOMBINATION	GOBP_MITOTIC_RECOMBINATION	25	-0.488398	-1.30475	0.220408	0.335546	1	2527	tags=48%, list=16%, signal=57%
GOBP_POSITIVE_REGULATION_OF_DNA_REPLICATION	GOBP_POSITIVE_REGULATION_OF_DNA_REPLICATION	39	-0.454227	-1.30466	0.176113	0.334528	1	955	tags=21%, list=6%, signal=22%
GOBP_CENTRIOLE_ASSEMBLY	GOBP_CENTRIOLE_ASSEMBLY	43	-0.426378	-1.30398	0.197065	0.334584	1	1788	tags=28%, list=12%, signal=31%
GOBP_MRNA_EXPORT_FROM_NUCLEUS	GOBP_MRNA_EXPORT_FROM_NUCLEUS	52	-0.283816	-1.29636	0.161885	0.346415	1	5008	tags=52%, list=33%, signal=77%
GOBP_NUCLEOSOME_ORGANIZATION	GOBP_NUCLEOSOME_ORGANIZATION	94	-0.2886	-1.29305	0.172277	0.35105	1	1937	tags=18%, list=13%, signal=21%
GOBP_DNA_METHYLATION_INVOLVED_IN_GAMETE_GENERATION	GOBP_DNA_METHYLATION_INVOLVED_IN_GAMETE_GENERATION	20	-0.594247	-1.28897	0.127835	0.356762	1	2115	tags=45%, list=14%, signal=52%
GOBP_NUCLEIC_ACID_PHOSPHODIESTER_BOND_HYDROLYSIS	GOBP_NUCLEIC_ACID_PHOSPHODIESTER_BOND_HYDROLYSIS	224	-0.271742	-1.28856	0.125773	0.356221	1	3014	tags=33%, list=20%, signal=41%
GOBP_PROTEIN_HYDROXYLATION	GOBP_PROTEIN_HYDROXYLATION	19	-0.507513	-1.28792	0.243513	0.356121	1	2046	tags=37%, list=13%, signal=42%
GOBP_LATE_ENDOSOME_TO_VACUOLE_TRANSPORT_VIA_MULTIVESICULAR_BODY_SORTING_PATHWAY	GOBP_LATE_ENDOSOME_TO_VACUOLE_TRANSPORT_VIA_MULTIVESICULAR_BODY_SORTING_PATHWAY	17	-0.369768	-1.28306	0.191781	0.363538	1	4120	tags=41%, list=27%, signal=56%
GOBP_MRNA_TRANSPORT	GOBP_MRNA_TRANSPORT	105	-0.272259	-1.28009	0.214583	0.367732	1	3715	tags=33%, list=24%, signal=44%
GOBP_TRANSCRIPTION_PREINITIATION_COMPLEX_ASSEMBLY	GOBP_TRANSCRIPTION_PREINITIATION_COMPLEX_ASSEMBLY	38	-0.324252	-1.27784	0.198039	0.370432	1	4191	tags=42%, list=27%, signal=58%
GOBP_POSITIVE_REGULATION_OF_TELOMERE_MAINTENANCE	GOBP_POSITIVE_REGULATION_OF_TELOMERE_MAINTENANCE	47	-0.304044	-1.27709	0.196819	0.370514	1	3194	tags=28%, list=21%, signal=35%
GOBP_EXIT_FROM_MITOSIS	GOBP_EXIT_FROM_MITOSIS	29	-0.392055	-1.27688	0.228175	0.369589	1	338	tags=14%, list=2%, signal=14%
GOBP_MALE_MEIOTIC_NUCLEAR_DIVISION	GOBP_MALE_MEIOTIC_NUCLEAR_DIVISION	42	-0.509323	-1.27668	0.131078	0.368682	1	2115	tags=36%, list=14%, signal=41%
GOBP_PROTEIN_TRANSMEMBRANE_TRANSPORT	GOBP_PROTEIN_TRANSMEMBRANE_TRANSPORT	56	-0.290382	-1.27319	0.180361	0.373735	1	3004	tags=36%, list=20%, signal=44%
GOBP_DEOXYRIBONUCLEOTIDE_BIOSYNTHETIC_PROCESS	GOBP_DEOXYRIBONUCLEOTIDE_BIOSYNTHETIC_PROCESS	15	-0.471921	-1.27316	0.187755	0.372543	1	1942	tags=33%, list=13%, signal=38%
GOBP_NEGATIVE_REGULATION_OF_PROTEASOMAL_PROTEIN_CATABOLIC_PROCESS	GOBP_NEGATIVE_REGULATION_OF_PROTEASOMAL_PROTEIN_CATABOLIC_PROCESS	39	-0.297382	-1.27192	0.166667	0.373495	1	2058	tags=15%, list=13%, signal=18%
GOBP_HISTONE_H3_K9_METHYLATION	GOBP_HISTONE_H3_K9_METHYLATION	38	-0.347028	-1.26878	0.164969	0.377878	1	1459	tags=18%, list=10%, signal=20%
GOBP_ESTABLISHMENT_OF_RNA_LOCALIZATION	GOBP_ESTABLISHMENT_OF_RNA_LOCALIZATION	137	-0.248655	-1.2687	0.182773	0.376734	1	4258	tags=39%, list=28%, signal=54%
GOBP_SYNAPTONEMAL_COMPLEX_ORGANIZATION	GOBP_SYNAPTONEMAL_COMPLEX_ORGANIZATION	21	-0.552243	-1.26363	0.165992	0.38462	1	2534	tags=48%, list=17%, signal=57%
GOBP_DNA_BIOSYNTHETIC_PROCESS	GOBP_DNA_BIOSYNTHETIC_PROCESS	174	-0.298701	-1.26326	0.195266	0.384003	1	2650	tags=27%, list=17%, signal=32%
GOBP_POSITIVE_REGULATION_OF_TELOMERE_CAPPING	GOBP_POSITIVE_REGULATION_OF_TELOMERE_CAPPING	15	-0.473965	-1.2604	0.206628	0.387903	1	91	tags=13%, list=1%, signal=13%
GOBP_NEGATIVE_REGULATION_OF_HISTONE_METHYLATION	GOBP_NEGATIVE_REGULATION_OF_HISTONE_METHYLATION	20	-0.393259	-1.25914	0.229814	0.389007	1	1461	tags=15%, list=10%, signal=17%
GOBP_MRNA_MODIFICATION	GOBP_MRNA_MODIFICATION	24	-0.419978	-1.25895	0.229645	0.38808	1	4278	tags=54%, list=28%, signal=75%
GOBP_DNA_TEMPLATED_TRANSCRIPTION_INITIATION	GOBP_DNA_TEMPLATED_TRANSCRIPTION_INITIATION	104	-0.257192	-1.25758	0.179337	0.389392	1	4323	tags=38%, list=28%, signal=52%
GOBP_DNA_SYNTHESIS_INVOLVED_IN_DNA_REPAIR	GOBP_DNA_SYNTHESIS_INVOLVED_IN_DNA_REPAIR	32	-0.373707	-1.25616	0.208748	0.39081	1	1883	tags=25%, list=12%, signal=28%
GOBP_DNA_METHYLATION	GOBP_DNA_METHYLATION	65	-0.410365	-1.25484	0.147348	0.391927	1	2287	tags=34%, list=15%, signal=40%
GOBP_AEROBIC_RESPIRATION	GOBP_AEROBIC_RESPIRATION	139	-0.251158	-1.25406	0.207156	0.391987	1	3431	tags=29%, list=22%, signal=38%
GOBP_REGULATION_OF_TELOMERE_CAPPING	GOBP_REGULATION_OF_TELOMERE_CAPPING	24	-0.377335	-1.25361	0.197154	0.391532	1	91	tags=8%, list=1%, signal=8%
GOBP_POSITIVE_REGULATION_OF_CYTOKINESIS	GOBP_POSITIVE_REGULATION_OF_CYTOKINESIS	37	-0.436568	-1.25284	0.225152	0.391622	1	1413	tags=22%, list=9%, signal=24%
GOBP_RESPIRATORY_ELECTRON_TRANSPORT_CHAIN	GOBP_RESPIRATORY_ELECTRON_TRANSPORT_CHAIN	87	-0.29114	-1.24656	0.229249	0.401652	1	4721	tags=51%, list=31%, signal=73%
GOBP_MITOCHONDRIAL_OUTER_MEMBRANE_PERMEABILIZATION	GOBP_MITOCHONDRIAL_OUTER_MEMBRANE_PERMEABILIZATION	28	-0.3556	-1.24551	0.19	0.402361	1	3323	tags=29%, list=22%, signal=36%
GOBP_PROTEIN_LOCALIZATION_TO_CYTOSKELETON	GOBP_PROTEIN_LOCALIZATION_TO_CYTOSKELETON	52	-0.332109	-1.24271	0.229979	0.406081	1	1413	tags=13%, list=9%, signal=15%
GOBP_POSITIVE_REGULATION_OF_MEIOTIC_CELL_CYCLE	GOBP_POSITIVE_REGULATION_OF_MEIOTIC_CELL_CYCLE	22	-0.515849	-1.24201	0.180723	0.406096	1	1858	tags=32%, list=12%, signal=36%
GOBP_NON_MEMBRANE_BOUNDED_ORGANELLE_ASSEMBLY	GOBP_NON_MEMBRANE_BOUNDED_ORGANELLE_ASSEMBLY	339	-0.297215	-1.23911	0.189024	0.410248	1	1675	tags=19%, list=11%, signal=21%
GOBP_POSITIVE_REGULATION_OF_HISTONE_H3_K4_METHYLATION	GOBP_POSITIVE_REGULATION_OF_HISTONE_H3_K4_METHYLATION	22	-0.387998	-1.23752	0.227723	0.411884	1	1851	tags=18%, list=12%, signal=21%
GOBP_REGULATION_OF_CELL_AGING	GOBP_REGULATION_OF_CELL_AGING	42	-0.371336	-1.23718	0.211268	0.411211	1	1744	tags=26%, list=11%, signal=29%
GOBP_NEGATIVE_REGULATION_OF_MRNA_SPLICING_VIA_SPLICEOSOME	GOBP_NEGATIVE_REGULATION_OF_MRNA_SPLICING_VIA_SPLICEOSOME	19	-0.383609	-1.23628	0.247917	0.411619	1	4265	tags=37%, list=28%, signal=51%
GOBP_FOLIC_ACID_CONTAINING_COMPOUND_METABOLIC_PROCESS	GOBP_FOLIC_ACID_CONTAINING_COMPOUND_METABOLIC_PROCESS	26	-0.423837	-1.23258	0.20935	0.41712	1	3359	tags=58%, list=22%, signal=74%
GOBP_MISMATCH_REPAIR	GOBP_MISMATCH_REPAIR	27	-0.357336	-1.23201	0.238	0.41691	1	2317	tags=26%, list=15%, signal=30%
GOBP_NEGATIVE_REGULATION_OF_CELL_CYCLE	GOBP_NEGATIVE_REGULATION_OF_CELL_CYCLE	321	-0.321856	-1.22987	0.206967	0.419542	1	1858	tags=23%, list=12%, signal=25%
GOBP_REGULATION_OF_TRANSLATIONAL_INITIATION	GOBP_REGULATION_OF_TRANSLATIONAL_INITIATION	73	-0.234666	-1.22603	0.223938	0.425453	1	3529	tags=34%, list=23%, signal=44%
GOBP_INNER_EAR_RECEPTOR_CELL_STEREOCILIUM_ORGANIZATION	GOBP_INNER_EAR_RECEPTOR_CELL_STEREOCILIUM_ORGANIZATION	26	-0.408017	-1.22597	0.22547	0.424234	1	3734	tags=46%, list=24%, signal=61%
GOBP_TRANSLESION_SYNTHESIS	GOBP_TRANSLESION_SYNTHESIS	20	-0.377338	-1.22456	0.242604	0.425628	1	1883	tags=25%, list=12%, signal=28%
GOBP_COLLECTING_DUCT_DEVELOPMENT	GOBP_COLLECTING_DUCT_DEVELOPMENT	15	-0.513477	-1.22077	0.221569	0.431589	1	857	tags=27%, list=6%, signal=28%
GOBP_MITOCHONDRIAL_GENOME_MAINTENANCE	GOBP_MITOCHONDRIAL_GENOME_MAINTENANCE	21	-0.418828	-1.21736	0.220619	0.436789	1	2941	tags=43%, list=19%, signal=53%
GOBP_NUCLEAR_TRANSCRIBED_MRNA_CATABOLIC_PROCESS_EXONUCLEOLYTIC	GOBP_NUCLEAR_TRANSCRIBED_MRNA_CATABOLIC_PROCESS_EXONUCLEOLYTIC	18	-0.368292	-1.20801	0.271287	0.453877	1	4163	tags=39%, list=27%, signal=53%
GOBP_NUCLEAR_TRANSCRIBED_MRNA_CATABOLIC_PROCESS	GOBP_NUCLEAR_TRANSCRIBED_MRNA_CATABOLIC_PROCESS	108	-0.214715	-1.20714	0.216049	0.454196	1	3605	tags=30%, list=23%, signal=38%
GOBP_NEGATIVE_REGULATION_OF_TELOMERE_MAINTENANCE_VIA_TELOMERASE	GOBP_NEGATIVE_REGULATION_OF_TELOMERE_MAINTENANCE_VIA_TELOMERASE	17	-0.350755	-1.20343	0.289474	0.459997	1	2327	tags=24%, list=15%, signal=28%
GOBP_DOSAGE_COMPENSATION	GOBP_DOSAGE_COMPENSATION	18	-0.36104	-1.20215	0.247951	0.461074	1	9820	tags=100%, list=64%, signal=277%
GOBP_NEGATIVE_REGULATION_OF_UBIQUITIN_DEPENDENT_PROTEIN_CATABOLIC_PROCESS	GOBP_NEGATIVE_REGULATION_OF_UBIQUITIN_DEPENDENT_PROTEIN_CATABOLIC_PROCESS	42	-0.269245	-1.19791	0.263158	0.467979	1	2058	tags=12%, list=13%, signal=14%
GOBP_INOSITOL_PHOSPHATE_CATABOLIC_PROCESS	GOBP_INOSITOL_PHOSPHATE_CATABOLIC_PROCESS	17	-0.417902	-1.19661	0.237705	0.46925	1	2266	tags=41%, list=15%, signal=48%
GOBP_POSITIVE_REGULATION_OF_TELOMERASE_ACTIVITY	GOBP_POSITIVE_REGULATION_OF_TELOMERASE_ACTIVITY	34	-0.349298	-1.19559	0.259188	0.469897	1	3448	tags=38%, list=22%, signal=49%
GOBP_METHYLATION	GOBP_METHYLATION	295	-0.241428	-1.19547	0.169355	0.468722	1	2914	tags=24%, list=19%, signal=29%
GOBP_SIGNAL_TRANSDUCTION_IN_RESPONSE_TO_DNA_DAMAGE	GOBP_SIGNAL_TRANSDUCTION_IN_RESPONSE_TO_DNA_DAMAGE	155	-0.318484	-1.19418	0.259843	0.469891	1	2774	tags=28%, list=18%, signal=34%
GOBP_N_TERMINAL_PROTEIN_AMINO_ACID_ACETYLATION	GOBP_N_TERMINAL_PROTEIN_AMINO_ACID_ACETYLATION	16	-0.390694	-1.19097	0.263889	0.475031	1	3553	tags=63%, list=23%, signal=81%
GOBP_PROTEIN_LOCALIZATION_TO_CHROMATIN	GOBP_PROTEIN_LOCALIZATION_TO_CHROMATIN	25	-0.413525	-1.18982	0.298805	0.475984	1	414	tags=20%, list=3%, signal=21%
GOBP_MALE_MEIOSIS_I	GOBP_MALE_MEIOSIS_I	24	-0.490083	-1.18412	0.243697	0.485978	1	2527	tags=33%, list=16%, signal=40%
GOBP_REGULATION_OF_CYCLIN_DEPENDENT_PROTEIN_KINASE_ACTIVITY	GOBP_REGULATION_OF_CYCLIN_DEPENDENT_PROTEIN_KINASE_ACTIVITY	91	-0.354959	-1.18407	0.263692	0.484622	1	976	tags=22%, list=6%, signal=23%
GOBP_ATP_SYNTHESIS_COUPLED_ELECTRON_TRANSPORT	GOBP_ATP_SYNTHESIS_COUPLED_ELECTRON_TRANSPORT	70	-0.287695	-1.18219	0.290514	0.486941	1	4721	tags=49%, list=31%, signal=70%
GOBP_POSITIVE_REGULATION_OF_RNA_SPLICING	GOBP_POSITIVE_REGULATION_OF_RNA_SPLICING	33	-0.343637	-1.18161	0.26898	0.486731	1	3101	tags=30%, list=20%, signal=38%
GOBP_ESTABLISHMENT_OF_MITOTIC_SPINDLE_LOCALIZATION	GOBP_ESTABLISHMENT_OF_MITOTIC_SPINDLE_LOCALIZATION	32	-0.404851	-1.17672	0.270833	0.495046	1	1823	tags=25%, list=12%, signal=28%
GOBP_REGULATION_OF_TELOMERASE_ACTIVITY	GOBP_REGULATION_OF_TELOMERASE_ACTIVITY	47	-0.303368	-1.17296	0.26938	0.501198	1	3448	tags=36%, list=22%, signal=46%
GOBP_NEGATIVE_REGULATION_OF_CELL_AGING	GOBP_NEGATIVE_REGULATION_OF_CELL_AGING	22	-0.457948	-1.17263	0.269231	0.500424	1	1744	tags=32%, list=11%, signal=36%
GOBP_FACULTATIVE_HETEROCHROMATIN_ASSEMBLY	GOBP_FACULTATIVE_HETEROCHROMATIN_ASSEMBLY	29	-0.33519	-1.17194	0.259635	0.500359	1	2774	tags=34%, list=18%, signal=42%
GOBP_PROTEIN_METHYLATION	GOBP_PROTEIN_METHYLATION	159	-0.239076	-1.16215	0.242105	0.519053	1	3195	tags=24%, list=21%, signal=30%
GOBP_PROTEIN_REFOLDING	GOBP_PROTEIN_REFOLDING	18	-0.361158	-1.16181	0.299603	0.51828	1	3980	tags=39%, list=26%, signal=52%
GOBP_TRANSCRIPTION_ELONGATION_FROM_RNA_POLYMERASE_II_PROMOTER	GOBP_TRANSCRIPTION_ELONGATION_FROM_RNA_POLYMERASE_II_PROMOTER	52	-0.247661	-1.16105	0.273438	0.5184	1	4229	tags=37%, list=28%, signal=50%
GOBP_PYRIMIDINE_NUCLEOSIDE_TRIPHOSPHATE_METABOLIC_PROCESS	GOBP_PYRIMIDINE_NUCLEOSIDE_TRIPHOSPHATE_METABOLIC_PROCESS	21	-0.372395	-1.1602	0.293522	0.518641	1	4099	tags=62%, list=27%, signal=84%
GOBP_PROTEIN_MONOUBIQUITINATION	GOBP_PROTEIN_MONOUBIQUITINATION	68	-0.266384	-1.15804	0.298077	0.521736	1	3572	tags=31%, list=23%, signal=40%
GOBP_MICROTUBULE_NUCLEATION	GOBP_MICROTUBULE_NUCLEATION	33	-0.303828	-1.15656	0.298755	0.523357	1	2476	tags=21%, list=16%, signal=25%
GOBP_PTERIDINE_CONTAINING_COMPOUND_METABOLIC_PROCESS	GOBP_PTERIDINE_CONTAINING_COMPOUND_METABOLIC_PROCESS	33	-0.364851	-1.15545	0.263366	0.524193	1	3359	tags=48%, list=22%, signal=62%
GOBP_OXIDATIVE_PHOSPHORYLATION	GOBP_OXIDATIVE_PHOSPHORYLATION	96	-0.261297	-1.15423	0.28215	0.525255	1	3431	tags=32%, list=22%, signal=41%
GOBP_NUCLEOBASE_METABOLIC_PROCESS	GOBP_NUCLEOBASE_METABOLIC_PROCESS	36	-0.37241	-1.15347	0.253521	0.525365	1	2774	tags=44%, list=18%, signal=54%
GOBP_REGULATION_OF_MITOCHONDRIAL_OUTER_MEMBRANE_PERMEABILIZATION_INVOLVED_IN_APOPTOTIC_SIGNALING_PATHWAY	GOBP_REGULATION_OF_MITOCHONDRIAL_OUTER_MEMBRANE_PERMEABILIZATION_INVOLVED_IN_APOPTOTIC_SIGNALING_PATHWAY	18	-0.381935	-1.15154	0.285996	0.527928	1	3323	tags=33%, list=22%, signal=42%
GOBP_GPI_ANCHOR_METABOLIC_PROCESS	GOBP_GPI_ANCHOR_METABOLIC_PROCESS	28	-0.361783	-1.1479	0.294821	0.534048	1	3338	tags=46%, list=22%, signal=59%
GOBP_REGULATION_OF_RESPONSE_TO_DNA_DAMAGE_STIMULUS	GOBP_REGULATION_OF_RESPONSE_TO_DNA_DAMAGE_STIMULUS	207	-0.265218	-1.14748	0.295775	0.533365	1	3192	tags=27%, list=21%, signal=34%
GOBP_GLUTAMINE_FAMILY_AMINO_ACID_METABOLIC_PROCESS	GOBP_GLUTAMINE_FAMILY_AMINO_ACID_METABOLIC_PROCESS	69	-0.379787	-1.14599	0.22869	0.535044	1	2695	tags=41%, list=18%, signal=49%
GOBP_HISTONE_PHOSPHORYLATION	GOBP_HISTONE_PHOSPHORYLATION	41	-0.406122	-1.14582	0.315686	0.533888	1	367	tags=15%, list=2%, signal=15%
GOBP_REPLICATIVE_SENESCENCE	GOBP_REPLICATIVE_SENESCENCE	16	-0.507632	-1.14345	0.334004	0.537439	1	1526	tags=31%, list=10%, signal=35%
GOBP_TYROSINE_METABOLIC_PROCESS	GOBP_TYROSINE_METABOLIC_PROCESS	15	-0.52808	-1.14035	0.302	0.542478	1	952	tags=20%, list=6%, signal=21%
GOBP_DNA_TEMPLATED_TRANSCRIPTION_TERMINATION	GOBP_DNA_TEMPLATED_TRANSCRIPTION_TERMINATION	15	-0.354986	-1.13994	0.287234	0.541855	1	3319	tags=27%, list=22%, signal=34%
GOBP_PROTEIN_HETEROOLIGOMERIZATION	GOBP_PROTEIN_HETEROOLIGOMERIZATION	26	-0.375421	-1.13863	0.282258	0.543097	1	1882	tags=19%, list=12%, signal=22%
GOBP_VIRION_ASSEMBLY	GOBP_VIRION_ASSEMBLY	32	-0.300642	-1.13838	0.330754	0.542107	1	4120	tags=41%, list=27%, signal=55%
GOBP_DNA_RECOMBINATION	GOBP_DNA_RECOMBINATION	256	-0.311822	-1.13742	0.316929	0.542598	1	3217	tags=36%, list=21%, signal=44%
GOBP_GANGLION_DEVELOPMENT	GOBP_GANGLION_DEVELOPMENT	17	-0.53749	-1.13678	0.284848	0.542458	1	2128	tags=47%, list=14%, signal=55%
GOBP_TELOMERE_CAPPING	GOBP_TELOMERE_CAPPING	35	-0.292416	-1.13584	0.331373	0.543062	1	91	tags=6%, list=1%, signal=6%
GOBP_PEPTIDYL_LYSINE_TRIMETHYLATION	GOBP_PEPTIDYL_LYSINE_TRIMETHYLATION	41	-0.275092	-1.13266	0.314928	0.548338	1	1766	tags=12%, list=11%, signal=14%
GOBP_QUINONE_METABOLIC_PROCESS	GOBP_QUINONE_METABOLIC_PROCESS	36	-0.4682	-1.13229	0.373717	0.547646	1	2288	tags=39%, list=15%, signal=46%
GOBP_PROTEIN_MODIFICATION_BY_SMALL_PROTEIN_REMOVAL	GOBP_PROTEIN_MODIFICATION_BY_SMALL_PROTEIN_REMOVAL	132	-0.218477	-1.13047	0.275304	0.550018	1	3948	tags=34%, list=26%, signal=45%
GOBP_SERINE_FAMILY_AMINO_ACID_METABOLIC_PROCESS	GOBP_SERINE_FAMILY_AMINO_ACID_METABOLIC_PROCESS	31	-0.397579	-1.12856	0.285141	0.552566	1	1607	tags=32%, list=10%, signal=36%
GOBP_PORPHYRIN_CONTAINING_COMPOUND_METABOLIC_PROCESS	GOBP_PORPHYRIN_CONTAINING_COMPOUND_METABOLIC_PROCESS	48	-0.341185	-1.12687	0.302605	0.554687	1	3250	tags=38%, list=21%, signal=47%
GOBP_POSITIVE_REGULATION_OF_DNA_BIOSYNTHETIC_PROCESS	GOBP_POSITIVE_REGULATION_OF_DNA_BIOSYNTHETIC_PROCESS	72	-0.310959	-1.12335	0.321705	0.560619	1	2590	tags=35%, list=17%, signal=42%
GOBP_CELLULAR_RESPIRATION	GOBP_CELLULAR_RESPIRATION	177	-0.223781	-1.12259	0.272374	0.560721	1	2986	tags=27%, list=19%, signal=33%
GOBP_PEPTIDYL_ASPARAGINE_MODIFICATION	GOBP_PEPTIDYL_ASPARAGINE_MODIFICATION	24	-0.371038	-1.1203	0.351889	0.563981	1	4906	tags=58%, list=32%, signal=86%
GOBP_REGULATION_OF_EXIT_FROM_MITOSIS	GOBP_REGULATION_OF_EXIT_FROM_MITOSIS	17	-0.42299	-1.11952	0.363636	0.564192	1	1823	tags=29%, list=12%, signal=33%
GOBP_DNA_MODIFICATION	GOBP_DNA_MODIFICATION	108	-0.322106	-1.11797	0.283673	0.56596	1	2115	tags=31%, list=14%, signal=35%
GOBP_NEGATIVE_REGULATION_OF_DNA_RECOMBINATION	GOBP_NEGATIVE_REGULATION_OF_DNA_RECOMBINATION	27	-0.401545	-1.11738	0.353175	0.565791	1	1672	tags=30%, list=11%, signal=33%
GOBP_CELL_REDOX_HOMEOSTASIS	GOBP_CELL_REDOX_HOMEOSTASIS	30	-0.362792	-1.11494	0.335366	0.569464	1	4317	tags=53%, list=28%, signal=74%
GOBP_PROTEIN_FOLDING	GOBP_PROTEIN_FOLDING	178	-0.217715	-1.11405	0.289157	0.569824	1	4076	tags=40%, list=27%, signal=54%
GOBP_REGULATION_OF_SIGNAL_TRANSDUCTION_BY_P53_CLASS_MEDIATOR	GOBP_REGULATION_OF_SIGNAL_TRANSDUCTION_BY_P53_CLASS_MEDIATOR	90	-0.286693	-1.11238	0.315488	0.571908	1	1983	tags=20%, list=13%, signal=23%
GOBP_IRON_SULFUR_CLUSTER_ASSEMBLY	GOBP_IRON_SULFUR_CLUSTER_ASSEMBLY	21	-0.351292	-1.11153	0.367063	0.572152	1	5197	tags=67%, list=34%, signal=101%
GOBP_TETRAPYRROLE_METABOLIC_PROCESS	GOBP_TETRAPYRROLE_METABOLIC_PROCESS	60	-0.308269	-1.11093	0.326653	0.571992	1	3250	tags=33%, list=21%, signal=42%
GOBP_TRICARBOXYLIC_ACID_CYCLE	GOBP_TRICARBOXYLIC_ACID_CYCLE	30	-0.320366	-1.11005	0.326489	0.57245	1	5113	tags=53%, list=33%, signal=80%
[truncated: 420 more rows]
