# Supplementary material for: Combining autophagy and immune characterizations to predict prognosis and therapeutic response in lung adenocarcinoma
Source: Front Immunol. 2022 Sep 13;13:944378. doi: 10.3389/fimmu.2022.944378 (PMC9513242; doi:10.3389/fimmu.2022.944378)
Supplement: Supplementary file 12 [file Table_5.xlsx]

## Sheet: gsea_report_for_low-risk group
NAME	GS<br> follow link to MSigDB	SIZE	ES	NES	NOM p-val	FDR q-val	FWER p-val	RANK AT MAX	LEADING EDGE	Column1
HALLMARK_ALLOGRAFT_REJECTION	HALLMARK_ALLOGRAFT_REJECTION	191	0.635111	1.58364	0.0350515	1	0.394	3158	tags=57%, list=21%, signal=70%
HALLMARK_IL6_JAK_STAT3_SIGNALING	HALLMARK_IL6_JAK_STAT3_SIGNALING	87	0.588753	1.56694	0.0317125	0.601688	0.427	4197	tags=63%, list=27%, signal=87%
HALLMARK_IL2_STAT5_SIGNALING	HALLMARK_IL2_STAT5_SIGNALING	193	0.461227	1.51835	0.0329897	0.552368	0.516	3446	tags=44%, list=22%, signal=55%
HALLMARK_INFLAMMATORY_RESPONSE	HALLMARK_INFLAMMATORY_RESPONSE	196	0.558564	1.50358	0.045738	0.457108	0.55	2964	tags=46%, list=19%, signal=57%
HALLMARK_INTERFERON_ALPHA_RESPONSE	HALLMARK_INTERFERON_ALPHA_RESPONSE	92	0.585442	1.47832	0.119403	0.426213	0.587	4919	tags=72%, list=32%, signal=105%
HALLMARK_INTERFERON_GAMMA_RESPONSE	HALLMARK_INTERFERON_GAMMA_RESPONSE	192	0.532419	1.46081	0.133333	0.393924	0.623	4919	tags=66%, list=32%, signal=95%
HALLMARK_ADIPOGENESIS	HALLMARK_ADIPOGENESIS	185	0.326947	1.4536	0.0823529	0.351158	0.634	4310	tags=26%, list=28%, signal=36%
HALLMARK_HEME_METABOLISM	HALLMARK_HEME_METABOLISM	188	0.328984	1.42111	0.0327198	0.36477	0.679	5091	tags=46%, list=33%, signal=68%
HALLMARK_APOPTOSIS	HALLMARK_APOPTOSIS	156	0.386198	1.41808	0.0766129	0.328628	0.687	4141	tags=37%, list=27%, signal=50%
HALLMARK_COMPLEMENT	HALLMARK_COMPLEMENT	191	0.43217	1.4046	0.0831601	0.31691	0.707	3915	tags=41%, list=25%, signal=54%
HALLMARK_KRAS_SIGNALING_UP	HALLMARK_KRAS_SIGNALING_UP	191	0.458748	1.38835	0.043659	0.312327	0.732	3567	tags=47%, list=23%, signal=60%
HALLMARK_MYOGENESIS	HALLMARK_MYOGENESIS	196	0.46425	1.3404	0.109504	0.35842	0.799	2962	tags=34%, list=19%, signal=42%
HALLMARK_BILE_ACID_METABOLISM	HALLMARK_BILE_ACID_METABOLISM	112	0.424097	1.33954	0.07431	0.332848	0.8	3645	tags=37%, list=24%, signal=48%
HALLMARK_APICAL_SURFACE	HALLMARK_APICAL_SURFACE	43	0.445556	1.2603	0.132797	0.424873	0.874	2510	tags=35%, list=16%, signal=42%
HALLMARK_APICAL_JUNCTION	HALLMARK_APICAL_JUNCTION	191	0.372408	1.23898	0.180198	0.432345	0.895	3270	tags=29%, list=21%, signal=36%
HALLMARK_UV_RESPONSE_DN	HALLMARK_UV_RESPONSE_DN	136	0.366556	1.22552	0.233068	0.427142	0.906	4467	tags=44%, list=29%, signal=62%
HALLMARK_TGF_BETA_SIGNALING	HALLMARK_TGF_BETA_SIGNALING	54	0.354516	1.22383	0.278557	0.404074	0.906	3375	tags=24%, list=22%, signal=31%
HALLMARK_TNFA_SIGNALING_VIA_NFKB	HALLMARK_TNFA_SIGNALING_VIA_NFKB	192	0.437051	1.19254	0.285425	0.428937	0.924	4075	tags=45%, list=27%, signal=60%
HALLMARK_P53_PATHWAY	HALLMARK_P53_PATHWAY	187	0.294278	1.15011	0.271008	0.471256	0.95	4055	tags=36%, list=26%, signal=48%
HALLMARK_PI3K_AKT_MTOR_SIGNALING	HALLMARK_PI3K_AKT_MTOR_SIGNALING	103	0.257717	1.12634	0.272727	0.484143	0.959	1826	tags=13%, list=12%, signal=14%
HALLMARK_COAGULATION	HALLMARK_COAGULATION	135	0.369889	1.12188	0.246436	0.468578	0.961	2370	tags=26%, list=15%, signal=30%
HALLMARK_HEDGEHOG_SIGNALING	HALLMARK_HEDGEHOG_SIGNALING	35	0.403764	1.10686	0.323471	0.470407	0.965	3729	tags=37%, list=24%, signal=49%
HALLMARK_NOTCH_SIGNALING	HALLMARK_NOTCH_SIGNALING	32	0.344209	1.07831	0.362903	0.49362	0.973	4989	tags=41%, list=32%, signal=60%
HALLMARK_ANGIOGENESIS	HALLMARK_ANGIOGENESIS	36	0.389074	1.07546	0.381526	0.477744	0.973	1617	tags=17%, list=11%, signal=19%
HALLMARK_KRAS_SIGNALING_DN	HALLMARK_KRAS_SIGNALING_DN	184	0.340139	1.02399	0.384146	0.538196	0.982	2144	tags=22%, list=14%, signal=26%
HALLMARK_FATTY_ACID_METABOLISM	HALLMARK_FATTY_ACID_METABOLISM	150	0.267984	1.0027	0.453649	0.550725	0.985	1470	tags=9%, list=10%, signal=9%
HALLMARK_ESTROGEN_RESPONSE_EARLY	HALLMARK_ESTROGEN_RESPONSE_EARLY	192	0.28496	0.996908	0.424547	0.53988	0.986	3289	tags=26%, list=21%, signal=33%
HALLMARK_PEROXISOME	HALLMARK_PEROXISOME	102	0.25122	0.991616	0.468687	0.528627	0.987	5062	tags=38%, list=33%, signal=57%
HALLMARK_ANDROGEN_RESPONSE	HALLMARK_ANDROGEN_RESPONSE	95	0.249532	0.981089	0.461386	0.524657	0.988	1895	tags=13%, list=12%, signal=14%
HALLMARK_XENOBIOTIC_METABOLISM	HALLMARK_XENOBIOTIC_METABOLISM	193	0.298703	0.978116	0.475248	0.51146	0.988	3105	tags=27%, list=20%, signal=33%
HALLMARK_UV_RESPONSE_UP	HALLMARK_UV_RESPONSE_UP	151	0.220987	0.856247	0.728916	0.678433	0.996	2955	tags=19%, list=19%, signal=24%
HALLMARK_PROTEIN_SECRETION	HALLMARK_PROTEIN_SECRETION	95	0.150612	0.784267	0.706967	0.769961	0.997	5071	tags=28%, list=33%, signal=42%
HALLMARK_WNT_BETA_CATENIN_SIGNALING	HALLMARK_WNT_BETA_CATENIN_SIGNALING	41	0.225487	0.744218	0.833333	0.807485	0.999	5037	tags=34%, list=33%, signal=51%
HALLMARK_CHOLESTEROL_HOMEOSTASIS	HALLMARK_CHOLESTEROL_HOMEOSTASIS	69	0.171398	0.618663	0.942387	0.9125	1	3263	tags=17%, list=21%, signal=22%
GOBP_FC_RECEPTOR_SIGNALING_PATHWAY	GOBP_FC_RECEPTOR_SIGNALING_PATHWAY	169	0.492573	2.01652	0	1	0.299	3102	tags=25%, list=20%, signal=32%
GOBP_SELECTIVE_AUTOPHAGY	GOBP_SELECTIVE_AUTOPHAGY	55	0.422211	1.90674	0.00793651	1	0.607	5018	tags=33%, list=33%, signal=48%
GOBP_REGULATION_OF_AUTOPHAGOSOME_ASSEMBLY	GOBP_REGULATION_OF_AUTOPHAGOSOME_ASSEMBLY	36	0.472906	1.90424	0.00193798	1	0.619	2699	tags=22%, list=18%, signal=27%
GOMF_SIGNALING_ADAPTOR_ACTIVITY	GOMF_SIGNALING_ADAPTOR_ACTIVITY	68	0.570886	1.89849	0	1	0.636	3826	tags=46%, list=25%, signal=60%
GOBP_FC_EPSILON_RECEPTOR_SIGNALING_PATHWAY	GOBP_FC_EPSILON_RECEPTOR_SIGNALING_PATHWAY	107	0.455637	1.8926	0.00398406	1	0.645	2327	tags=18%, list=15%, signal=21%
GOCC_PHAGOCYTIC_VESICLE	GOCC_PHAGOCYTIC_VESICLE	128	0.52839	1.88246	0.0019685	1	0.673	4033	tags=46%, list=26%, signal=62%
GOBP_REGULATION_OF_ESTABLISHMENT_OR_MAINTENANCE_OF_CELL_POLARITY	GOBP_REGULATION_OF_ESTABLISHMENT_OR_MAINTENANCE_OF_CELL_POLARITY	21	0.624996	1.87463	0	0.967289	0.707	3372	tags=43%, list=22%, signal=55%
GOCC_PHOSPHATIDYLINOSITOL_3_KINASE_COMPLEX	GOCC_PHOSPHATIDYLINOSITOL_3_KINASE_COMPLEX	25	0.627301	1.85993	0	0.974285	0.753	2416	tags=32%, list=16%, signal=38%
GOBP_CYTOPLASMIC_PATTERN_RECOGNITION_RECEPTOR_SIGNALING_PATHWAY	GOBP_CYTOPLASMIC_PATTERN_RECOGNITION_RECEPTOR_SIGNALING_PATHWAY	60	0.489656	1.85586	0.0116959	0.899525	0.766	2966	tags=27%, list=19%, signal=33%
GOBP_NUCLEOTIDE_BINDING_DOMAIN_LEUCINE_RICH_REPEAT_CONTAINING_RECEPTOR_SIGNALING_PATHWAY	GOBP_NUCLEOTIDE_BINDING_DOMAIN_LEUCINE_RICH_REPEAT_CONTAINING_RECEPTOR_SIGNALING_PATHWAY	35	0.573765	1.8489	0.00996016	0.866214	0.789	2966	tags=31%, list=19%, signal=39%
GOMF_GUANYL_NUCLEOTIDE_EXCHANGE_FACTOR_ACTIVITY	GOMF_GUANYL_NUCLEOTIDE_EXCHANGE_FACTOR_ACTIVITY	181	0.463589	1.83705	0	0.879754	0.829	3993	tags=42%, list=26%, signal=56%
GOMF_SIGNALING_RECEPTOR_COMPLEX_ADAPTOR_ACTIVITY	GOMF_SIGNALING_RECEPTOR_COMPLEX_ADAPTOR_ACTIVITY	42	0.605024	1.8315	0.00200803	0.845659	0.84	3100	tags=40%, list=20%, signal=51%
GOCC_LATE_ENDOSOME	GOCC_LATE_ENDOSOME	231	0.452253	1.82447	0	0.833304	0.854	3011	tags=24%, list=20%, signal=30%
GOBP_NATURAL_KILLER_CELL_DIFFERENTIATION	GOBP_NATURAL_KILLER_CELL_DIFFERENTIATION	18	0.696896	1.81066	0	0.873816	0.878	2942	tags=44%, list=19%, signal=55%
GOBP_REGULATION_OF_CALCIUM_MEDIATED_SIGNALING	GOBP_REGULATION_OF_CALCIUM_MEDIATED_SIGNALING	61	0.665365	1.80239	0	0.876052	0.886	3174	tags=52%, list=21%, signal=66%
GOCC_ENDOSOME_MEMBRANE	GOCC_ENDOSOME_MEMBRANE	448	0.395954	1.79636	0.00204918	0.865206	0.896	4075	tags=29%, list=27%, signal=39%
GOBP_PROTEIN_LOCALIZATION_TO_CELL_SURFACE	GOBP_PROTEIN_LOCALIZATION_TO_CELL_SURFACE	60	0.574046	1.79578	0	0.817092	0.897	1995	tags=28%, list=13%, signal=32%
GOBP_T_CELL_RECEPTOR_SIGNALING_PATHWAY	GOBP_T_CELL_RECEPTOR_SIGNALING_PATHWAY	179	0.55516	1.79509	0.0174757	0.776181	0.899	3138	tags=34%, list=20%, signal=42%
GOCC_ENDOCYTIC_VESICLE	GOCC_ENDOCYTIC_VESICLE	283	0.487455	1.79464	0	0.738041	0.899	4033	tags=38%, list=26%, signal=51%
GOBP_NEGATIVE_REGULATION_OF_AUTOPHAGOSOME_ASSEMBLY	GOBP_NEGATIVE_REGULATION_OF_AUTOPHAGOSOME_ASSEMBLY	15	0.592202	1.79158	0.00772201	0.718843	0.901	2017	tags=27%, list=13%, signal=31%
GOMF_AMINOPEPTIDASE_ACTIVITY	GOMF_AMINOPEPTIDASE_ACTIVITY	34	0.596567	1.79047	0.00198413	0.690262	0.903	2271	tags=29%, list=15%, signal=34%
GOBP_FC_RECEPTOR_MEDIATED_STIMULATORY_SIGNALING_PATHWAY	GOBP_FC_RECEPTOR_MEDIATED_STIMULATORY_SIGNALING_PATHWAY	81	0.521219	1.78972	0.00798403	0.665133	0.905	3102	tags=31%, list=20%, signal=38%
GOBP_I_KAPPAB_PHOSPHORYLATION	GOBP_I_KAPPAB_PHOSPHORYLATION	19	0.737574	1.7871	0	0.64826	0.908	1286	tags=37%, list=8%, signal=40%
GOBP_NEGATIVE_REGULATION_OF_AUTOPHAGY	GOBP_NEGATIVE_REGULATION_OF_AUTOPHAGY	77	0.469834	1.78237	0.00389105	0.647675	0.918	2875	tags=25%, list=19%, signal=30%
GOCC_EARLY_ENDOSOME_MEMBRANE	GOCC_EARLY_ENDOSOME_MEMBRANE	138	0.44364	1.77386	0.00206612	0.672087	0.93	4714	tags=44%, list=31%, signal=63%
GOCC_AZUROPHIL_GRANULE_MEMBRANE	GOCC_AZUROPHIL_GRANULE_MEMBRANE	54	0.53627	1.77359	0.00614754	0.647646	0.93	4145	tags=39%, list=27%, signal=53%
GOBP_IMMUNE_RESPONSE_REGULATING_SIGNALING_PATHWAY	GOBP_IMMUNE_RESPONSE_REGULATING_SIGNALING_PATHWAY	365	0.553353	1.76992	0.0135397	0.645797	0.933	3142	tags=38%, list=20%, signal=47%
GOBP_NEGATIVE_REGULATION_OF_SMALL_GTPASE_MEDIATED_SIGNAL_TRANSDUCTION	GOBP_NEGATIVE_REGULATION_OF_SMALL_GTPASE_MEDIATED_SIGNAL_TRANSDUCTION	52	0.545671	1.76562	0.0059761	0.645277	0.943	3729	tags=48%, list=24%, signal=63%
GOBP_T_CELL_LINEAGE_COMMITMENT	GOBP_T_CELL_LINEAGE_COMMITMENT	26	0.760327	1.75452	0.00196464	0.685084	0.949	2032	tags=46%, list=13%, signal=53%
GOBP_CD4_POSITIVE_OR_CD8_POSITIVE_ALPHA_BETA_T_CELL_LINEAGE_COMMITMENT	GOBP_CD4_POSITIVE_OR_CD8_POSITIVE_ALPHA_BETA_T_CELL_LINEAGE_COMMITMENT	21	0.811036	1.75193	0.00392157	0.677322	0.952	2032	tags=52%, list=13%, signal=60%
GOBP_REGULATION_OF_PHOSPHATASE_ACTIVITY	GOBP_REGULATION_OF_PHOSPHATASE_ACTIVITY	156	0.441288	1.75166	0	0.657445	0.953	3211	tags=28%, list=21%, signal=34%
GOCC_RECYCLING_ENDOSOME_MEMBRANE	GOCC_RECYCLING_ENDOSOME_MEMBRANE	76	0.459495	1.75094	0.00404858	0.640611	0.954	4559	tags=46%, list=30%, signal=65%
GOBP_RESPONSE_TO_INTERLEUKIN_7	GOBP_RESPONSE_TO_INTERLEUKIN_7	26	0.631649	1.75082	0.0154143	0.62164	0.954	2380	tags=38%, list=15%, signal=45%
GOBP_REGULATION_OF_PHOSPHOPROTEIN_PHOSPHATASE_ACTIVITY	GOBP_REGULATION_OF_PHOSPHOPROTEIN_PHOSPHATASE_ACTIVITY	107	0.461516	1.74933	0.00190476	0.611004	0.956	1785	tags=20%, list=12%, signal=22%
GOBP_STRESS_FIBER_ASSEMBLY	GOBP_STRESS_FIBER_ASSEMBLY	97	0.507781	1.74824	0.00396825	0.599021	0.956	3528	tags=41%, list=23%, signal=53%
GOMF_TRANSFORMING_GROWTH_FACTOR_BETA_RECEPTOR_BINDING	GOMF_TRANSFORMING_GROWTH_FACTOR_BETA_RECEPTOR_BINDING	23	0.679547	1.74765	0.00392157	0.58522	0.957	2658	tags=43%, list=17%, signal=52%
GOMF_PHOSPHATIDYLINOSITOL_3_KINASE_REGULATOR_ACTIVITY	GOMF_PHOSPHATIDYLINOSITOL_3_KINASE_REGULATOR_ACTIVITY	17	0.666704	1.74765	0.0100806	0.569403	0.957	2380	tags=47%, list=15%, signal=56%
GOBP_LYSOSOME_LOCALIZATION	GOBP_LYSOSOME_LOCALIZATION	66	0.55489	1.74648	0.00760456	0.559661	0.958	2657	tags=36%, list=17%, signal=44%
GOCC_SIDE_OF_MEMBRANE	GOCC_SIDE_OF_MEMBRANE	489	0.568091	1.74404	0.00197628	0.556841	0.959	2510	tags=39%, list=16%, signal=45%
GOBP_MYD88_INDEPENDENT_TOLL_LIKE_RECEPTOR_SIGNALING_PATHWAY	GOBP_MYD88_INDEPENDENT_TOLL_LIKE_RECEPTOR_SIGNALING_PATHWAY	33	0.576466	1.74298	0.00988142	0.548426	0.96	2277	tags=27%, list=15%, signal=32%
GOBP_ANTIGEN_RECEPTOR_MEDIATED_SIGNALING_PATHWAY	GOBP_ANTIGEN_RECEPTOR_MEDIATED_SIGNALING_PATHWAY	220	0.596031	1.74247	0.0164271	0.53712	0.961	3138	tags=39%, list=20%, signal=48%
GOMF_GTPASE_ACTIVATING_PROTEIN_BINDING	GOMF_GTPASE_ACTIVATING_PROTEIN_BINDING	15	0.582373	1.72308	0.0116732	0.618829	0.975	3036	tags=33%, list=20%, signal=42%
GOBP_POSITIVE_REGULATION_OF_NF_KAPPAB_TRANSCRIPTION_FACTOR_ACTIVITY	GOBP_POSITIVE_REGULATION_OF_NF_KAPPAB_TRANSCRIPTION_FACTOR_ACTIVITY	150	0.506758	1.72258	0.0059761	0.606968	0.977	2246	tags=28%, list=15%, signal=32%
GOBP_CALCIUM_MEDIATED_SIGNALING	GOBP_CALCIUM_MEDIATED_SIGNALING	176	0.601833	1.71959	0	0.608294	0.979	3215	tags=46%, list=21%, signal=58%
GOBP_REGULATION_OF_LEUKOCYTE_MEDIATED_IMMUNITY	GOBP_REGULATION_OF_LEUKOCYTE_MEDIATED_IMMUNITY	183	0.639153	1.71953	0.00792079	0.595017	0.979	2629	tags=47%, list=17%, signal=56%
GOBP_PHAGOCYTOSIS	GOBP_PHAGOCYTOSIS	248	0.540898	1.71927	0.01002	0.58348	0.979	3536	tags=44%, list=23%, signal=56%
GOMF_SH2_DOMAIN_BINDING	GOMF_SH2_DOMAIN_BINDING	37	0.606072	1.71892	0.00384615	0.572445	0.979	2560	tags=41%, list=17%, signal=49%
GOBP_RAC_PROTEIN_SIGNAL_TRANSDUCTION	GOBP_RAC_PROTEIN_SIGNAL_TRANSDUCTION	36	0.51985	1.7189	0.00582524	0.56055	0.979	4648	tags=58%, list=30%, signal=83%
GOCC_MULTIVESICULAR_BODY	GOCC_MULTIVESICULAR_BODY	51	0.628549	1.71774	0.00398406	0.554794	0.98	1994	tags=29%, list=13%, signal=34%
GOCC_EXTERNAL_SIDE_OF_PLASMA_MEMBRANE	GOCC_EXTERNAL_SIDE_OF_PLASMA_MEMBRANE	292	0.631006	1.7171	0.00191205	0.547062	0.98	2994	tags=53%, list=19%, signal=65%
GOBP_VASCULAR_ENDOTHELIAL_CELL_PROLIFERATION	GOBP_VASCULAR_ENDOTHELIAL_CELL_PROLIFERATION	19	0.690226	1.71575	0.00957854	0.542323	0.981	1321	tags=32%, list=9%, signal=35%
GOBP_REGULATION_OF_MAST_CELL_ACTIVATION	GOBP_REGULATION_OF_MAST_CELL_ACTIVATION	37	0.668667	1.71303	0.0019305	0.544701	0.981	2365	tags=49%, list=15%, signal=57%
GOCC_EARLY_ENDOSOME	GOCC_EARLY_ENDOSOME	330	0.402759	1.71176	0.0020284	0.54012	0.982	4185	tags=36%, list=27%, signal=49%
GOBP_ALPHA_BETA_T_CELL_ACTIVATION	GOBP_ALPHA_BETA_T_CELL_ACTIVATION	136	0.640992	1.70907	0.0156556	0.54349	0.983	3245	tags=53%, list=21%, signal=67%
GOBP_B_CELL_HOMEOSTASIS	GOBP_B_CELL_HOMEOSTASIS	27	0.656078	1.70801	0.0116959	0.538403	0.985	2453	tags=41%, list=16%, signal=48%
GOBP_POSITIVE_REGULATION_OF_CALCIUM_MEDIATED_SIGNALING	GOBP_POSITIVE_REGULATION_OF_CALCIUM_MEDIATED_SIGNALING	27	0.699033	1.70698	0	0.532746	0.987	3174	tags=52%, list=21%, signal=65%
GOCC_PHAGOCYTIC_VESICLE_MEMBRANE	GOCC_PHAGOCYTIC_VESICLE_MEMBRANE	70	0.487558	1.70681	0.0143737	0.524142	0.987	5196	tags=59%, list=34%, signal=88%
GOBP_REGULATION_OF_DEFENSE_RESPONSE_TO_VIRUS_BY_VIRUS	GOBP_REGULATION_OF_DEFENSE_RESPONSE_TO_VIRUS_BY_VIRUS	29	0.587403	1.7066	0.0136986	0.516009	0.987	1661	tags=31%, list=11%, signal=35%
GOBP_NEGATIVE_REGULATION_OF_IMMUNE_EFFECTOR_PROCESS	GOBP_NEGATIVE_REGULATION_OF_IMMUNE_EFFECTOR_PROCESS	114	0.591317	1.70601	0.00392927	0.509338	0.987	3375	tags=48%, list=22%, signal=61%
GOBP_NEGATIVE_REGULATION_OF_IMMUNE_RESPONSE	GOBP_NEGATIVE_REGULATION_OF_IMMUNE_RESPONSE	132	0.590461	1.70571	0.00200803	0.502243	0.988	3382	tags=48%, list=22%, signal=61%
GOBP_POSITIVE_REGULATION_OF_NATURAL_KILLER_CELL_ACTIVATION	GOBP_POSITIVE_REGULATION_OF_NATURAL_KILLER_CELL_ACTIVATION	19	0.717454	1.70427	0.00396825	0.499965	0.988	2989	tags=58%, list=19%, signal=72%
GOBP_CELLULAR_RESPONSE_TO_EXOGENOUS_DSRNA	GOBP_CELLULAR_RESPONSE_TO_EXOGENOUS_DSRNA	15	0.670382	1.70334	0.0157171	0.496221	0.988	2156	tags=33%, list=14%, signal=39%
GOCC_CLATHRIN_COATED_VESICLE	GOCC_CLATHRIN_COATED_VESICLE	178	0.479899	1.70271	0	0.491065	0.988	4058	tags=38%, list=26%, signal=51%
GOBP_CD4_POSITIVE_ALPHA_BETA_T_CELL_ACTIVATION	GOBP_CD4_POSITIVE_ALPHA_BETA_T_CELL_ACTIVATION	89	0.626188	1.70195	0.0135135	0.486471	0.988	3245	tags=52%, list=21%, signal=65%
GOMF_PHOSPHOTYROSINE_RESIDUE_BINDING	GOMF_PHOSPHOTYROSINE_RESIDUE_BINDING	44	0.542746	1.70142	0.0180723	0.481128	0.988	2560	tags=34%, list=17%, signal=41%
GOBP_REGULATION_OF_ADAPTIVE_IMMUNE_RESPONSE	GOBP_REGULATION_OF_ADAPTIVE_IMMUNE_RESPONSE	153	0.626463	1.69807	0.0100806	0.488486	0.988	3086	tags=50%, list=20%, signal=62%
GOBP_REGULATION_OF_REACTIVE_OXYGEN_SPECIES_BIOSYNTHETIC_PROCESS	GOBP_REGULATION_OF_REACTIVE_OXYGEN_SPECIES_BIOSYNTHETIC_PROCESS	82	0.572463	1.69764	0.00573614	0.482696	0.988	2710	tags=35%, list=18%, signal=43%
GOBP_POSITIVE_T_CELL_SELECTION	GOBP_POSITIVE_T_CELL_SELECTION	35	0.779724	1.69639	0.0059761	0.480658	0.988	2032	tags=54%, list=13%, signal=62%
GOCC_VACUOLAR_MEMBRANE	GOCC_VACUOLAR_MEMBRANE	372	0.383486	1.69459	0.00626305	0.481178	0.99	4591	tags=35%, list=30%, signal=49%
GOMF_MOLECULAR_ADAPTOR_ACTIVITY	GOMF_MOLECULAR_ADAPTOR_ACTIVITY	298	0.369525	1.69316	0.00194553	0.479958	0.991	4113	tags=31%, list=27%, signal=41%
GOBP_NEGATIVE_REGULATION_OF_OSTEOCLAST_DIFFERENTIATION	GOBP_NEGATIVE_REGULATION_OF_OSTEOCLAST_DIFFERENTIATION	24	0.705944	1.69241	0	0.4757	0.991	1705	tags=38%, list=11%, signal=42%
GOBP_POSITIVE_REGULATION_OF_INTERLEUKIN_1_PRODUCTION	GOBP_POSITIVE_REGULATION_OF_INTERLEUKIN_1_PRODUCTION	52	0.678322	1.69234	0.0115607	0.469486	0.991	3285	tags=58%, list=21%, signal=73%
GOBP_NEGATIVE_REGULATION_OF_DEPHOSPHORYLATION	GOBP_NEGATIVE_REGULATION_OF_DEPHOSPHORYLATION	93	0.476448	1.69216	0	0.464084	0.991	3115	tags=29%, list=20%, signal=36%
GOBP_REGULATION_OF_T_CELL_DIFFERENTIATION_IN_THYMUS	GOBP_REGULATION_OF_T_CELL_DIFFERENTIATION_IN_THYMUS	20	0.680097	1.69182	0	0.459012	0.991	1394	tags=30%, list=9%, signal=33%
GOBP_POSITIVE_REGULATION_OF_MACROAUTOPHAGY	GOBP_POSITIVE_REGULATION_OF_MACROAUTOPHAGY	55	0.420827	1.69056	0.0171103	0.457446	0.991	5018	tags=42%, list=33%, signal=62%
GOBP_REGULATION_OF_IMMUNE_EFFECTOR_PROCESS	GOBP_REGULATION_OF_IMMUNE_EFFECTOR_PROCESS	355	0.587339	1.69039	0.0059761	0.452006	0.991	2989	tags=45%, list=19%, signal=54%
GOBP_INTERLEUKIN_7_MEDIATED_SIGNALING_PATHWAY	GOBP_INTERLEUKIN_7_MEDIATED_SIGNALING_PATHWAY	17	0.71293	1.68938	0.00584795	0.449837	0.991	2380	tags=53%, list=15%, signal=63%
GOBP_ACTIVATION_OF_IMMUNE_RESPONSE	GOBP_ACTIVATION_OF_IMMUNE_RESPONSE	411	0.538527	1.68927	0.0181818	0.444418	0.991	3350	tags=39%, list=22%, signal=49%
GOBP_MACROPHAGE_MIGRATION	GOBP_MACROPHAGE_MIGRATION	45	0.679876	1.6888	0.00197628	0.440474	0.992	2455	tags=47%, list=16%, signal=55%
GOBP_POSITIVE_REGULATION_OF_AUTOPHAGY	GOBP_POSITIVE_REGULATION_OF_AUTOPHAGY	112	0.370588	1.68871	0.011257	0.435247	0.992	5018	tags=38%, list=33%, signal=55%
GOBP_REGULATION_OF_PHOSPHATIDYLINOSITOL_3_KINASE_ACTIVITY	GOBP_REGULATION_OF_PHOSPHATIDYLINOSITOL_3_KINASE_ACTIVITY	51	0.635917	1.68761	0.00394477	0.434013	0.992	2380	tags=39%, list=15%, signal=46%
GOBP_POSITIVE_REGULATION_OF_LEUKOCYTE_CELL_CELL_ADHESION	GOBP_POSITIVE_REGULATION_OF_LEUKOCYTE_CELL_CELL_ADHESION	215	0.61771	1.68585	0.0138067	0.435019	0.992	3017	tags=51%, list=20%, signal=62%
GOBP_T_CELL_ACTIVATION	GOBP_T_CELL_ACTIVATION	431	0.562716	1.68478	0.01417	0.433872	0.992	3166	tags=43%, list=21%, signal=52%
GOBP_NEGATIVE_REGULATION_OF_OXIDOREDUCTASE_ACTIVITY	GOBP_NEGATIVE_REGULATION_OF_OXIDOREDUCTASE_ACTIVITY	21	0.674174	1.68348	0.00772201	0.433188	0.993	2259	tags=38%, list=15%, signal=45%
GOBP_MACROPHAGE_CHEMOTAXIS	GOBP_MACROPHAGE_CHEMOTAXIS	31	0.639217	1.68322	0.00400802	0.428913	0.993	3145	tags=52%, list=20%, signal=65%
GOBP_I_KAPPAB_KINASE_NF_KAPPAB_SIGNALING	GOBP_I_KAPPAB_KINASE_NF_KAPPAB_SIGNALING	253	0.439972	1.68255	0.0138889	0.426037	0.993	2966	tags=25%, list=19%, signal=31%
GOBP_TUMOR_NECROSIS_FACTOR_SUPERFAMILY_CYTOKINE_PRODUCTION	GOBP_TUMOR_NECROSIS_FACTOR_SUPERFAMILY_CYTOKINE_PRODUCTION	135	0.608337	1.68255	0.0116505	0.421165	0.993	3117	tags=50%, list=20%, signal=62%
GOBP_POSITIVE_REGULATION_OF_CATABOLIC_PROCESS	GOBP_POSITIVE_REGULATION_OF_CATABOLIC_PROCESS	417	0.346262	1.68152	0.00380952	0.420014	0.993	4841	tags=35%, list=32%, signal=50%
GOCC_CLATHRIN_COATED_ENDOCYTIC_VESICLE	GOCC_CLATHRIN_COATED_ENDOCYTIC_VESICLE	49	0.6359	1.68069	0.002079	0.418208	0.994	3066	tags=41%, list=20%, signal=51%
GOBP_ADAPTIVE_IMMUNE_RESPONSE_BASED_ON_SOMATIC_RECOMBINATION_OF_IMMUNE_RECEPTORS_BUILT_FROM_IMMUNOGLOBULIN_SUPERFAMILY_DOMAINS	GOBP_ADAPTIVE_IMMUNE_RESPONSE_BASED_ON_SOMATIC_RECOMBINATION_OF_IMMUNE_RECEPTORS_BUILT_FROM_IMMUNOGLOBULIN_SUPERFAMILY_DOMAINS	237	0.595625	1.68023	0.0120724	0.414893	0.994	2989	tags=46%, list=19%, signal=56%
GOBP_POSITIVE_REGULATION_OF_ALPHA_BETA_T_CELL_ACTIVATION	GOBP_POSITIVE_REGULATION_OF_ALPHA_BETA_T_CELL_ACTIVATION	60	0.674081	1.67949	0.0137795	0.412864	0.994	3245	tags=62%, list=21%, signal=78%
GOBP_T_CELL_DIFFERENTIATION_IN_THYMUS	GOBP_T_CELL_DIFFERENTIATION_IN_THYMUS	69	0.596577	1.67845	0.018	0.411989	0.994	1509	tags=28%, list=10%, signal=30%
GOBP_INTERLEUKIN_6_MEDIATED_SIGNALING_PATHWAY	GOBP_INTERLEUKIN_6_MEDIATED_SIGNALING_PATHWAY	22	0.588324	1.67827	0.0114943	0.408194	0.994	1651	tags=27%, list=11%, signal=31%
GOBP_NEGATIVE_REGULATION_OF_PROTEIN_DEPHOSPHORYLATION	GOBP_NEGATIVE_REGULATION_OF_PROTEIN_DEPHOSPHORYLATION	55	0.552118	1.67808	0.00397614	0.404431	0.994	3078	tags=35%, list=20%, signal=43%
GOMF_MANNOSIDASE_ACTIVITY	GOMF_MANNOSIDASE_ACTIVITY	15	0.573094	1.67716	0.0198413	0.403242	0.994	4232	tags=60%, list=28%, signal=83%
GOMF_PHOSPHOPROTEIN_BINDING	GOMF_PHOSPHOPROTEIN_BINDING	86	0.434767	1.67704	0.0206186	0.399388	0.994	2256	tags=22%, list=15%, signal=26%
GOMF_PROTEIN_PHOSPHORYLATED_AMINO_ACID_BINDING	GOMF_PROTEIN_PHOSPHORYLATED_AMINO_ACID_BINDING	56	0.486082	1.67627	0.0183673	0.397742	0.994	3308	tags=32%, list=22%, signal=41%
GOBP_HEART_FORMATION	GOBP_HEART_FORMATION	27	0.683587	1.6761	0.00801603	0.394133	0.994	2790	tags=44%, list=18%, signal=54%
GOBP_MAINTENANCE_OF_BLOOD_BRAIN_BARRIER	GOBP_MAINTENANCE_OF_BLOOD_BRAIN_BARRIER	33	0.626408	1.67563	0.00582524	0.391774	0.994	2605	tags=42%, list=17%, signal=51%
GOBP_NATURAL_KILLER_CELL_ACTIVATION	GOBP_NATURAL_KILLER_CELL_ACTIVATION	75	0.582833	1.67562	0.0181818	0.387877	0.994	2989	tags=39%, list=19%, signal=48%
GOMF_CALCIUM_DEPENDENT_PROTEIN_KINASE_ACTIVITY	GOMF_CALCIUM_DEPENDENT_PROTEIN_KINASE_ACTIVITY	23	0.556041	1.67557	0.014	0.384138	0.994	4669	tags=61%, list=30%, signal=87%
GOBP_THYMIC_T_CELL_SELECTION	GOBP_THYMIC_T_CELL_SELECTION	22	0.770954	1.67486	0.00607287	0.38255	0.994	1106	tags=45%, list=7%, signal=49%
GOBP_LYMPHOCYTE_MEDIATED_IMMUNITY	GOBP_LYMPHOCYTE_MEDIATED_IMMUNITY	221	0.60103	1.67317	0.00994036	0.384152	0.994	2629	tags=42%, list=17%, signal=50%
GOBP_NEGATIVE_REGULATION_OF_INNATE_IMMUNE_RESPONSE	GOBP_NEGATIVE_REGULATION_OF_INNATE_IMMUNE_RESPONSE	55	0.581268	1.67295	0.0212355	0.381179	0.994	4237	tags=55%, list=28%, signal=75%
GOBP_REGULATION_OF_ALPHA_BETA_T_CELL_ACTIVATION	GOBP_REGULATION_OF_ALPHA_BETA_T_CELL_ACTIVATION	90	0.651688	1.67219	0.0135922	0.380117	0.994	3245	tags=54%, list=21%, signal=69%
GOBP_REGULATION_OF_SUPEROXIDE_METABOLIC_PROCESS	GOBP_REGULATION_OF_SUPEROXIDE_METABOLIC_PROCESS	26	0.666308	1.67082	0.00589391	0.381097	0.994	2248	tags=50%, list=15%, signal=58%
GOBP_PATTERN_RECOGNITION_RECEPTOR_SIGNALING_PATHWAY	GOBP_PATTERN_RECOGNITION_RECEPTOR_SIGNALING_PATHWAY	181	0.496604	1.67039	0.022449	0.378997	0.994	2351	tags=28%, list=15%, signal=32%
GOBP_CALCINEURIN_MEDIATED_SIGNALING	GOBP_CALCINEURIN_MEDIATED_SIGNALING	41	0.569495	1.66943	0	0.378633	0.995	3779	tags=44%, list=25%, signal=58%
GOBP_TOLL_LIKE_RECEPTOR_9_SIGNALING_PATHWAY	GOBP_TOLL_LIKE_RECEPTOR_9_SIGNALING_PATHWAY	25	0.678559	1.66917	0.0177165	0.376009	0.995	1722	tags=32%, list=11%, signal=36%
GOBP_POSITIVE_REGULATION_OF_LEUKOCYTE_PROLIFERATION	GOBP_POSITIVE_REGULATION_OF_LEUKOCYTE_PROLIFERATION	136	0.629532	1.66904	0.0060241	0.372981	0.995	3288	tags=53%, list=21%, signal=67%
GOBP_LEUKOCYTE_ADHESION_TO_VASCULAR_ENDOTHELIAL_CELL	GOBP_LEUKOCYTE_ADHESION_TO_VASCULAR_ENDOTHELIAL_CELL	44	0.676825	1.66856	0.00566038	0.371004	0.995	2358	tags=50%, list=15%, signal=59%
GOBP_T_CELL_MEDIATED_IMMUNITY	GOBP_T_CELL_MEDIATED_IMMUNITY	93	0.616315	1.66822	0.0176125	0.36879	0.995	3426	tags=53%, list=22%, signal=67%
GOBP_MODIFICATION_OF_SYNAPTIC_STRUCTURE	GOBP_MODIFICATION_OF_SYNAPTIC_STRUCTURE	18	0.638627	1.66768	0.0180723	0.367313	0.995	2757	tags=39%, list=18%, signal=47%
GOBP_EMBRYONIC_HINDLIMB_MORPHOGENESIS	GOBP_EMBRYONIC_HINDLIMB_MORPHOGENESIS	25	0.691756	1.6674	0	0.364883	0.995	1159	tags=32%, list=8%, signal=35%
GOBP_T_CELL_SELECTION	GOBP_T_CELL_SELECTION	47	0.759493	1.667	0.00816326	0.36329	0.995	2248	tags=55%, list=15%, signal=65%
GOBP_CLATHRIN_DEPENDENT_ENDOCYTOSIS	GOBP_CLATHRIN_DEPENDENT_ENDOCYTOSIS	46	0.494328	1.66583	0.0196078	0.363325	0.995	3789	tags=30%, list=25%, signal=40%
GOBP_NEGATIVE_REGULATION_OF_MACROAUTOPHAGY	GOBP_NEGATIVE_REGULATION_OF_MACROAUTOPHAGY	33	0.412904	1.66556	0.0289017	0.360962	0.995	2017	tags=15%, list=13%, signal=17%
GOBP_LEUKOCYTE_MEDIATED_CYTOTOXICITY	GOBP_LEUKOCYTE_MEDIATED_CYTOTOXICITY	95	0.650061	1.66524	0.00784314	0.358791	0.995	2263	tags=45%, list=15%, signal=53%
GOBP_T_CELL_DIFFERENTIATION	GOBP_T_CELL_DIFFERENTIATION	230	0.575112	1.66501	0.0159363	0.356409	0.995	2830	tags=40%, list=18%, signal=48%
GOBP_REGULATION_OF_LYMPHOCYTE_MEDIATED_IMMUNITY	GOBP_REGULATION_OF_LYMPHOCYTE_MEDIATED_IMMUNITY	133	0.640305	1.66494	0.0157791	0.353655	0.995	2989	tags=51%, list=19%, signal=63%
GOBP_REGULATION_OF_LEUKOCYTE_DEGRANULATION	GOBP_REGULATION_OF_LEUKOCYTE_DEGRANULATION	40	0.633128	1.66428	0.00976562	0.352843	0.995	2365	tags=43%, list=15%, signal=50%
GOBP_LEUKOCYTE_CELL_CELL_ADHESION	GOBP_LEUKOCYTE_CELL_CELL_ADHESION	327	0.579641	1.66407	0.0178218	0.350586	0.995	3017	tags=46%, list=20%, signal=55%
GOBP_CELL_CELL_ADHESION_MEDIATED_BY_INTEGRIN	GOBP_CELL_CELL_ADHESION_MEDIATED_BY_INTEGRIN	15	0.721161	1.6635	0.0179641	0.349391	0.995	1805	tags=47%, list=12%, signal=53%
GOBP_POSITIVE_REGULATION_OF_CELL_ACTIVATION	GOBP_POSITIVE_REGULATION_OF_CELL_ACTIVATION	302	0.584749	1.66345	0.01	0.346777	0.995	3017	tags=46%, list=20%, signal=56%
GOBP_T_HELPER_CELL_LINEAGE_COMMITMENT	GOBP_T_HELPER_CELL_LINEAGE_COMMITMENT	17	0.795751	1.66311	0.00796813	0.344912	0.995	1988	tags=47%, list=13%, signal=54%
GOBP_RESPONSE_TO_MURAMYL_DIPEPTIDE	GOBP_RESPONSE_TO_MURAMYL_DIPEPTIDE	18	0.629787	1.66244	0.0163265	0.343902	0.995	2934	tags=44%, list=19%, signal=55%
GOCC_IMMUNOLOGICAL_SYNAPSE	GOCC_IMMUNOLOGICAL_SYNAPSE	38	0.660803	1.66087	0.0333333	0.345391	0.995	2294	tags=42%, list=15%, signal=49%
GOBP_T_CELL_MEDIATED_CYTOTOXICITY	GOBP_T_CELL_MEDIATED_CYTOTOXICITY	40	0.688788	1.66081	0.0117188	0.342892	0.995	3152	tags=60%, list=21%, signal=75%
GOBP_LEUKOCYTE_DIFFERENTIATION	GOBP_LEUKOCYTE_DIFFERENTIATION	486	0.525884	1.66078	0.0196078	0.340266	0.995	3211	tags=39%, list=21%, signal=48%
GOBP_POSITIVE_REGULATION_OF_PROTEIN_CATABOLIC_PROCESS	GOBP_POSITIVE_REGULATION_OF_PROTEIN_CATABOLIC_PROCESS	206	0.374991	1.66033	0.00585938	0.338678	0.995	3853	tags=29%, list=25%, signal=38%
GOBP_ALPHA_BETA_T_CELL_DIFFERENTIATION	GOBP_ALPHA_BETA_T_CELL_DIFFERENTIATION	101	0.621679	1.65896	0.0196078	0.339867	0.995	3653	tags=55%, list=24%, signal=72%
GOMF_PROTEIN_MACROMOLECULE_ADAPTOR_ACTIVITY	GOMF_PROTEIN_MACROMOLECULE_ADAPTOR_ACTIVITY	249	0.374119	1.6588	0.00392927	0.337801	0.995	4113	tags=31%, list=27%, signal=41%
GOBP_POSITIVE_REGULATION_OF_I_KAPPAB_KINASE_NF_KAPPAB_SIGNALING	GOBP_POSITIVE_REGULATION_OF_I_KAPPAB_KINASE_NF_KAPPAB_SIGNALING	167	0.433998	1.65879	0.0141129	0.335267	0.995	2966	tags=26%, list=19%, signal=32%
GOBP_AUTOPHAGOSOME_ORGANIZATION	GOBP_AUTOPHAGOSOME_ORGANIZATION	83	0.335389	1.65877	0.0216535	0.332802	0.995	2699	tags=13%, list=18%, signal=16%
GOMF_PATTERN_RECOGNITION_RECEPTOR_ACTIVITY	GOMF_PATTERN_RECOGNITION_RECEPTOR_ACTIVITY	23	0.781676	1.65838	0.00389105	0.331373	0.995	1781	tags=52%, list=12%, signal=59%
GOBP_POSITIVE_REGULATION_OF_CHEMOKINE_PRODUCTION	GOBP_POSITIVE_REGULATION_OF_CHEMOKINE_PRODUCTION	56	0.645168	1.65475	0.00584795	0.339181	0.995	2934	tags=54%, list=19%, signal=66%
GOBP_ADAPTIVE_IMMUNE_RESPONSE	GOBP_ADAPTIVE_IMMUNE_RESPONSE	375	0.614065	1.65463	0.0219124	0.337096	0.995	2560	tags=46%, list=17%, signal=54%
GOBP_POSITIVE_REGULATION_OF_CELL_ADHESION	GOBP_POSITIVE_REGULATION_OF_CELL_ADHESION	392	0.531968	1.65458	0.0155642	0.334838	0.995	3039	tags=41%, list=20%, signal=49%
GOBP_T_CELL_PROLIFERATION	GOBP_T_CELL_PROLIFERATION	177	0.601673	1.65441	0.0143149	0.332862	0.995	2978	tags=46%, list=19%, signal=56%
GOBP_CD4_POSITIVE_ALPHA_BETA_T_CELL_DIFFERENTIATION	GOBP_CD4_POSITIVE_ALPHA_BETA_T_CELL_DIFFERENTIATION	76	0.628785	1.6542	0.0175097	0.33094	0.995	3245	tags=53%, list=21%, signal=66%
GOBP_REGULATION_OF_MAST_CELL_ACTIVATION_INVOLVED_IN_IMMUNE_RESPONSE	GOBP_REGULATION_OF_MAST_CELL_ACTIVATION_INVOLVED_IN_IMMUNE_RESPONSE	28	0.623605	1.65399	0.0170132	0.329343	0.995	2365	tags=43%, list=15%, signal=51%
GOBP_REGULATION_OF_CALCINEURIN_MEDIATED_SIGNALING	GOBP_REGULATION_OF_CALCINEURIN_MEDIATED_SIGNALING	31	0.610908	1.65399	0	0.327024	0.995	3174	tags=42%, list=21%, signal=53%
GOMF_PHOSPHATIDYLINOSITOL_3_4_5_TRISPHOSPHATE_BINDING	GOMF_PHOSPHATIDYLINOSITOL_3_4_5_TRISPHOSPHATE_BINDING	36	0.511225	1.65248	0.02	0.328946	0.995	4315	tags=44%, list=28%, signal=62%
GOBP_REGULATION_OF_PRODUCTION_OF_MOLECULAR_MEDIATOR_OF_IMMUNE_RESPONSE	GOBP_REGULATION_OF_PRODUCTION_OF_MOLECULAR_MEDIATOR_OF_IMMUNE_RESPONSE	132	0.599591	1.65238	0.00982318	0.326957	0.995	2978	tags=44%, list=19%, signal=54%
GOCC_ENDOCYTIC_VESICLE_MEMBRANE	GOCC_ENDOCYTIC_VESICLE_MEMBRANE	148	0.49213	1.65184	0.00409836	0.326318	0.995	3066	tags=30%, list=20%, signal=37%
GOMF_NUCLEOSIDE_TRIPHOSPHATASE_REGULATOR_ACTIVITY	GOMF_NUCLEOSIDE_TRIPHOSPHATASE_REGULATOR_ACTIVITY	455	0.373397	1.65141	0.00389864	0.325146	0.995	4287	tags=38%, list=28%, signal=51%
GOMF_MANNOSE_BINDING	GOMF_MANNOSE_BINDING	17	0.660458	1.65115	0.00795229	0.323756	0.995	1081	tags=24%, list=7%, signal=25%
GOBP_ACTIVATION_OF_PHOSPHOLIPASE_C_ACTIVITY	GOBP_ACTIVATION_OF_PHOSPHOLIPASE_C_ACTIVITY	32	0.667195	1.651	0.0019084	0.322018	0.995	2796	tags=53%, list=18%, signal=65%
GOBP_PROTEIN_TARGETING_TO_LYSOSOME	GOBP_PROTEIN_TARGETING_TO_LYSOSOME	22	0.452692	1.64975	0.027451	0.323309	0.996	5710	tags=68%, list=37%, signal=108%
GOBP_EMBRYONIC_HEMOPOIESIS	GOBP_EMBRYONIC_HEMOPOIESIS	22	0.597451	1.64956	0.0171429	0.321687	0.996	2330	tags=36%, list=15%, signal=43%
GOCC_MEMBRANE_MICRODOMAIN	GOCC_MEMBRANE_MICRODOMAIN	298	0.475654	1.64949	0.00193798	0.319738	0.996	2362	tags=30%, list=15%, signal=34%
GOBP_REGULATION_OF_PATTERN_RECOGNITION_RECEPTOR_SIGNALING_PATHWAY	GOBP_REGULATION_OF_PATTERN_RECOGNITION_RECEPTOR_SIGNALING_PATHWAY	85	0.542861	1.64948	0.0201613	0.317663	0.996	2934	tags=34%, list=19%, signal=42%
GOCC_COATED_VESICLE	GOCC_COATED_VESICLE	272	0.40261	1.64948	0.00402414	0.315608	0.996	4060	tags=30%, list=26%, signal=40%
GOBP_POSITIVE_REGULATION_OF_INTERLEUKIN_2_PRODUCTION	GOBP_POSITIVE_REGULATION_OF_INTERLEUKIN_2_PRODUCTION	29	0.722096	1.64943	0.0214844	0.31371	0.996	2838	tags=59%, list=18%, signal=72%
GOBP_MAST_CELL_ACTIVATION	GOBP_MAST_CELL_ACTIVATION	56	0.633259	1.64913	0.00763359	0.312635	0.996	2416	tags=50%, list=16%, signal=59%
GOBP_POSITIVE_REGULATION_OF_LIPASE_ACTIVITY	GOBP_POSITIVE_REGULATION_OF_LIPASE_ACTIVITY	69	0.605446	1.64898	0.003861	0.310976	0.996	2842	tags=41%, list=19%, signal=50%
GOBP_POSITIVE_REGULATION_OF_T_CELL_PROLIFERATION	GOBP_POSITIVE_REGULATION_OF_T_CELL_PROLIFERATION	90	0.673959	1.64869	0.0138614	0.309769	0.996	2978	tags=57%, list=19%, signal=70%
GOBP_POSITIVE_REGULATION_OF_CELL_CELL_ADHESION	GOBP_POSITIVE_REGULATION_OF_CELL_CELL_ADHESION	251	0.575999	1.64827	0.0177515	0.308792	0.996	3017	tags=47%, list=20%, signal=58%
GOBP_REGULATION_OF_ACTIN_FILAMENT_BUNDLE_ASSEMBLY	GOBP_REGULATION_OF_ACTIN_FILAMENT_BUNDLE_ASSEMBLY	93	0.485171	1.64749	0.0153846	0.308789	0.996	3266	tags=38%, list=21%, signal=48%
GOBP_POSITIVE_REGULATION_OF_ADAPTIVE_IMMUNE_RESPONSE	GOBP_POSITIVE_REGULATION_OF_ADAPTIVE_IMMUNE_RESPONSE	88	0.623834	1.64705	0.0159681	0.307855	0.996	2989	tags=50%, list=19%, signal=62%
GOBP_REGULATION_OF_CD4_POSITIVE_ALPHA_BETA_T_CELL_ACTIVATION	GOBP_REGULATION_OF_CD4_POSITIVE_ALPHA_BETA_T_CELL_ACTIVATION	57	0.656306	1.64607	0.0172745	0.308413	0.996	3245	tags=56%, list=21%, signal=71%
GOBP_REGULATION_OF_SYNCYTIUM_FORMATION_BY_PLASMA_MEMBRANE_FUSION	GOBP_REGULATION_OF_SYNCYTIUM_FORMATION_BY_PLASMA_MEMBRANE_FUSION	22	0.6424	1.64599	0.00816326	0.306706	0.996	3623	tags=59%, list=24%, signal=77%
GOBP_NEGATIVE_REGULATION_OF_LEUKOCYTE_MEDIATED_IMMUNITY	GOBP_NEGATIVE_REGULATION_OF_LEUKOCYTE_MEDIATED_IMMUNITY	48	0.667951	1.64599	0.00594059	0.304834	0.996	3152	tags=63%, list=21%, signal=78%
GOBP_POSITIVE_REGULATION_OF_MEMBRANE_POTENTIAL	GOBP_POSITIVE_REGULATION_OF_MEMBRANE_POTENTIAL	15	0.572497	1.64591	0.0168421	0.303179	0.996	339	tags=13%, list=2%, signal=14%
GOBP_LYMPHOCYTE_ACTIVATION_INVOLVED_IN_IMMUNE_RESPONSE	GOBP_LYMPHOCYTE_ACTIVATION_INVOLVED_IN_IMMUNE_RESPONSE	171	0.541428	1.64567	0.0314961	0.301886	0.996	2125	tags=31%, list=14%, signal=36%
GOBP_NEGATIVE_REGULATION_OF_RESPONSE_TO_BIOTIC_STIMULUS	GOBP_NEGATIVE_REGULATION_OF_RESPONSE_TO_BIOTIC_STIMULUS	85	0.531338	1.64549	0.0275049	0.30053	0.996	4806	tags=55%, list=31%, signal=80%
GOBP_POSITIVE_REGULATION_OF_IMMUNE_EFFECTOR_PROCESS	GOBP_POSITIVE_REGULATION_OF_IMMUNE_EFFECTOR_PROCESS	190	0.602849	1.64502	0.0119048	0.299977	0.996	3245	tags=51%, list=21%, signal=63%
GOBP_CELLULAR_RESPONSE_TO_DSRNA	GOBP_CELLULAR_RESPONSE_TO_DSRNA	19	0.573613	1.64449	0.0404624	0.299348	0.996	2156	tags=26%, list=14%, signal=31%
GOBP_REGULATION_OF_PROTEIN_DEPHOSPHORYLATION	GOBP_REGULATION_OF_PROTEIN_DEPHOSPHORYLATION	127	0.421237	1.64436	0.00585938	0.297956	0.996	3078	tags=26%, list=20%, signal=32%
GOBP_APOPTOTIC_CELL_CLEARANCE	GOBP_APOPTOTIC_CELL_CLEARANCE	45	0.613093	1.64397	0.0116505	0.297068	0.996	4237	tags=62%, list=28%, signal=86%
GOCC_CYTOPLASMIC_SIDE_OF_MEMBRANE	GOCC_CYTOPLASMIC_SIDE_OF_MEMBRANE	183	0.414869	1.64332	0.003861	0.296819	0.996	2460	tags=25%, list=16%, signal=30%
GOBP_ACTIVATION_OF_CYSTEINE_TYPE_ENDOPEPTIDASE_ACTIVITY_INVOLVED_IN_APOPTOTIC_PROCESS	GOBP_ACTIVATION_OF_CYSTEINE_TYPE_ENDOPEPTIDASE_ACTIVITY_INVOLVED_IN_APOPTOTIC_PROCESS	81	0.498051	1.64326	0.0165631	0.295202	0.996	2566	tags=33%, list=17%, signal=40%
GOMF_THYROID_HORMONE_RECEPTOR_BINDING	GOMF_THYROID_HORMONE_RECEPTOR_BINDING	28	0.422464	1.64295	0.0094697	0.294176	0.996	4642	tags=29%, list=30%, signal=41%
GOMF_IMMUNE_RECEPTOR_ACTIVITY	GOMF_IMMUNE_RECEPTOR_ACTIVITY	117	0.656059	1.64124	0.00596422	0.29669	0.997	3182	tags=66%, list=21%, signal=82%
GOBP_RESPONSE_TO_INTERFERON_ALPHA	GOBP_RESPONSE_TO_INTERFERON_ALPHA	20	0.662632	1.64067	0.019685	0.296364	0.997	3157	tags=50%, list=21%, signal=63%
GOBP_REGULATION_OF_AMYLOID_BETA_CLEARANCE	GOBP_REGULATION_OF_AMYLOID_BETA_CLEARANCE	16	0.70544	1.64064	0.00792079	0.29476	0.997	3211	tags=56%, list=21%, signal=71%
GOCC_RECYCLING_ENDOSOME	GOCC_RECYCLING_ENDOSOME	155	0.398016	1.64019	0.00965251	0.294304	0.997	4845	tags=46%, list=32%, signal=67%
GOBP_LYMPHOCYTE_COSTIMULATION	GOBP_LYMPHOCYTE_COSTIMULATION	56	0.671602	1.63996	0.0155945	0.293312	0.997	2904	tags=54%, list=19%, signal=66%
GOBP_NEGATIVE_REGULATION_OF_RESPONSE_TO_ENDOPLASMIC_RETICULUM_STRESS	GOBP_NEGATIVE_REGULATION_OF_RESPONSE_TO_ENDOPLASMIC_RETICULUM_STRESS	39	0.425948	1.63987	0.0382409	0.291916	0.997	4628	tags=31%, list=30%, signal=44%
GOBP_NEGATIVE_REGULATION_OF_TYPE_I_INTERFERON_PRODUCTION	GOBP_NEGATIVE_REGULATION_OF_TYPE_I_INTERFERON_PRODUCTION	41	0.571517	1.63902	0.0444444	0.292411	0.997	2749	tags=39%, list=18%, signal=47%
GOBP_REGULATION_OF_MYELOID_LEUKOCYTE_MEDIATED_IMMUNITY	GOBP_REGULATION_OF_MYELOID_LEUKOCYTE_MEDIATED_IMMUNITY	50	0.63163	1.63855	0.006	0.291915	0.997	3100	tags=48%, list=20%, signal=60%
GOBP_REGULATION_OF_VACUOLE_ORGANIZATION	GOBP_REGULATION_OF_VACUOLE_ORGANIZATION	44	0.378496	1.63829	0.0298211	0.290993	0.997	3709	tags=25%, list=24%, signal=33%
GOBP_MONONUCLEAR_CELL_DIFFERENTIATION	GOBP_MONONUCLEAR_CELL_DIFFERENTIATION	382	0.533277	1.63724	0.0238569	0.291782	0.997	3211	tags=40%, list=21%, signal=49%
GOBP_POSITIVE_REGULATION_OF_TUMOR_NECROSIS_FACTOR_SUPERFAMILY_CYTOKINE_PRODUCTION	GOBP_POSITIVE_REGULATION_OF_TUMOR_NECROSIS_FACTOR_SUPERFAMILY_CYTOKINE_PRODUCTION	80	0.595886	1.63697	0.0270793	0.29071	0.997	2248	tags=39%, list=15%, signal=45%
GOBP_OUTFLOW_TRACT_SEPTUM_MORPHOGENESIS	GOBP_OUTFLOW_TRACT_SEPTUM_MORPHOGENESIS	25	0.657451	1.63679	0.0121212	0.289515	0.997	3204	tags=52%, list=21%, signal=66%
GOBP_CELLULAR_EXTRAVASATION	GOBP_CELLULAR_EXTRAVASATION	67	0.619628	1.63664	0.0113852	0.288267	0.997	3076	tags=52%, list=20%, signal=65%
GOBP_REGULATION_OF_RAS_PROTEIN_SIGNAL_TRANSDUCTION	GOBP_REGULATION_OF_RAS_PROTEIN_SIGNAL_TRANSDUCTION	180	0.425707	1.63529	0.00790514	0.289998	0.997	3754	tags=41%, list=24%, signal=53%
GOMF_SH3_DOMAIN_BINDING	GOMF_SH3_DOMAIN_BINDING	121	0.431009	1.63474	0.00603622	0.289761	0.997	2828	tags=31%, list=18%, signal=37%
GOCC_CAVEOLA	GOCC_CAVEOLA	72	0.549702	1.6345	0.00391389	0.288815	0.997	2011	tags=32%, list=13%, signal=37%
GOBP_POSITIVE_REGULATION_OF_PROTEIN_KINASE_B_SIGNALING	GOBP_POSITIVE_REGULATION_OF_PROTEIN_KINASE_B_SIGNALING	153	0.529717	1.63435	0.00389105	0.287633	0.997	2416	tags=35%, list=16%, signal=41%
GOBP_PIGMENT_GRANULE_ORGANIZATION	GOBP_PIGMENT_GRANULE_ORGANIZATION	23	0.540476	1.63332	0.0248447	0.288613	0.997	1990	tags=26%, list=13%, signal=30%
GOBP_POSITIVE_REGULATION_OF_CYTOKINE_PRODUCTION	GOBP_POSITIVE_REGULATION_OF_CYTOKINE_PRODUCTION	390	0.5262	1.63223	0.0192678	0.289743	0.997	3015	tags=38%, list=20%, signal=47%
GOBP_REGULATION_OF_MACROPHAGE_MIGRATION	GOBP_REGULATION_OF_MACROPHAGE_MIGRATION	33	0.661528	1.63185	0.00978474	0.289135	0.997	2796	tags=48%, list=18%, signal=59%
GOBP_MAST_CELL_ACTIVATION_INVOLVED_IN_IMMUNE_RESPONSE	GOBP_MAST_CELL_ACTIVATION_INVOLVED_IN_IMMUNE_RESPONSE	44	0.610681	1.63135	0.0166359	0.288788	0.997	2416	tags=48%, list=16%, signal=56%
GOMF_ALKALI_METAL_ION_BINDING	GOMF_ALKALI_METAL_ION_BINDING	15	0.710301	1.63073	0.0141129	0.288631	0.997	1536	tags=33%, list=10%, signal=37%
GOBP_NEGATIVE_REGULATION_OF_ORGANELLE_ASSEMBLY	GOBP_NEGATIVE_REGULATION_OF_ORGANELLE_ASSEMBLY	40	0.418913	1.63062	0.0177866	0.287467	0.997	3472	tags=30%, list=23%, signal=39%
GOCC_EXTRINSIC_COMPONENT_OF_CYTOPLASMIC_SIDE_OF_PLASMA_MEMBRANE	GOCC_EXTRINSIC_COMPONENT_OF_CYTOPLASMIC_SIDE_OF_PLASMA_MEMBRANE	96	0.464422	1.6306	0.00573614	0.286062	0.997	2571	tags=33%, list=17%, signal=40%
GOBP_NEGATIVE_REGULATION_OF_INTERLEUKIN_6_PRODUCTION	GOBP_NEGATIVE_REGULATION_OF_INTERLEUKIN_6_PRODUCTION	40	0.70778	1.63054	0.0117647	0.284746	0.997	3789	tags=78%, list=25%, signal=103%
GOBP_POSITIVE_REGULATION_OF_LEUKOCYTE_MEDIATED_IMMUNITY	GOBP_POSITIVE_REGULATION_OF_LEUKOCYTE_MEDIATED_IMMUNITY	104	0.644851	1.62872	0.0237624	0.287484	0.998	2032	tags=41%, list=13%, signal=47%
GOBP_TRACHEA_DEVELOPMENT	GOBP_TRACHEA_DEVELOPMENT	17	0.694583	1.62855	0.00590551	0.286382	0.998	2254	tags=35%, list=15%, signal=41%
GOBP_INOSITOL_PHOSPHATE_MEDIATED_SIGNALING	GOBP_INOSITOL_PHOSPHATE_MEDIATED_SIGNALING	50	0.556242	1.62841	0.0037594	0.285302	0.998	3288	tags=40%, list=21%, signal=51%
GOBP_REGULATION_OF_LEUKOCYTE_MEDIATED_CYTOTOXICITY	GOBP_REGULATION_OF_LEUKOCYTE_MEDIATED_CYTOTOXICITY	66	0.683488	1.6283	0.0134875	0.28417	0.998	2263	tags=50%, list=15%, signal=58%
GOBP_DETECTION_OF_OTHER_ORGANISM	GOBP_DETECTION_OF_OTHER_ORGANISM	17	0.72308	1.62777	0.014	0.284046	0.998	2954	tags=59%, list=19%, signal=73%
GOBP_REGULATION_OF_GTPASE_ACTIVITY	GOBP_REGULATION_OF_GTPASE_ACTIVITY	425	0.405175	1.62762	0.00994036	0.282996	0.998	3361	tags=32%, list=22%, signal=40%
GOCC_SECRETORY_GRANULE_MEMBRANE	GOCC_SECRETORY_GRANULE_MEMBRANE	282	0.474953	1.62739	0.0173745	0.282026	0.998	4165	tags=44%, list=27%, signal=59%
GOBP_CYTOKINE_PRODUCTION_INVOLVED_IN_IMMUNE_RESPONSE	GOBP_CYTOKINE_PRODUCTION_INVOLVED_IN_IMMUNE_RESPONSE	87	0.595943	1.62671	0.00970874	0.282262	0.998	2978	tags=45%, list=19%, signal=55%
GOBP_POSITIVE_REGULATION_OF_ERYTHROCYTE_DIFFERENTIATION	GOBP_POSITIVE_REGULATION_OF_ERYTHROCYTE_DIFFERENTIATION	26	0.482315	1.62559	0.024952	0.283599	0.998	2358	tags=23%, list=15%, signal=27%
GOBP_REGULATION_OF_NITRIC_OXIDE_METABOLIC_PROCESS	GOBP_REGULATION_OF_NITRIC_OXIDE_METABOLIC_PROCESS	53	0.606369	1.62531	0.0114504	0.282972	0.998	2710	tags=42%, list=18%, signal=50%
GOBP_INFLAMMATORY_RESPONSE_TO_ANTIGENIC_STIMULUS	GOBP_INFLAMMATORY_RESPONSE_TO_ANTIGENIC_STIMULUS	53	0.636402	1.62511	0.0181087	0.282048	0.998	3086	tags=47%, list=20%, signal=59%
GOBP_SMALL_GTPASE_MEDIATED_SIGNAL_TRANSDUCTION	GOBP_SMALL_GTPASE_MEDIATED_SIGNAL_TRANSDUCTION	470	0.397538	1.62467	0.00970874	0.281604	0.998	3888	tags=39%, list=25%, signal=50%
GOBP_AMYLOID_BETA_CLEARANCE	GOBP_AMYLOID_BETA_CLEARANCE	35	0.623268	1.62365	0.0131579	0.282486	0.998	2836	tags=49%, list=18%, signal=59%
GOCC_COP9_SIGNALOSOME	GOCC_COP9_SIGNALOSOME	29	0.436117	1.62329	0.0253906	0.281853	0.998	2568	tags=21%, list=17%, signal=25%
GOBP_LEUKOCYTE_PROLIFERATION	GOBP_LEUKOCYTE_PROLIFERATION	286	0.568514	1.62234	0.0162933	0.282741	0.998	2989	tags=44%, list=19%, signal=53%
GOBP_ACTIVATED_T_CELL_PROLIFERATION	GOBP_ACTIVATED_T_CELL_PROLIFERATION	40	0.667946	1.62217	0.0101833	0.281748	0.998	2862	tags=50%, list=19%, signal=61%
GOBP_NEGATIVE_REGULATION_OF_IMMUNE_SYSTEM_PROCESS	GOBP_NEGATIVE_REGULATION_OF_IMMUNE_SYSTEM_PROCESS	341	0.537895	1.62158	0.025	0.281902	0.998	3406	tags=45%, list=22%, signal=57%
GOBP_REGULATION_OF_PROTEIN_TARGETING	GOBP_REGULATION_OF_PROTEIN_TARGETING	65	0.386715	1.62117	0.0117417	0.281524	0.998	3084	tags=20%, list=20%, signal=25%
GOBP_REGULATION_OF_DEPHOSPHORYLATION	GOBP_REGULATION_OF_DEPHOSPHORYLATION	187	0.389522	1.62111	0.00767754	0.280355	0.998	3115	tags=25%, list=20%, signal=31%
GOBP_REGULATION_OF_MULTICELLULAR_ORGANISM_GROWTH	GOBP_REGULATION_OF_MULTICELLULAR_ORGANISM_GROWTH	57	0.51922	1.62017	0.0177866	0.281037	0.998	3011	tags=33%, list=20%, signal=41%
GOBP_POSITIVE_REGULATION_OF_DEFENSE_RESPONSE_TO_VIRUS_BY_HOST	GOBP_POSITIVE_REGULATION_OF_DEFENSE_RESPONSE_TO_VIRUS_BY_HOST	27	0.646126	1.61977	0.0320641	0.280735	0.998	2219	tags=33%, list=14%, signal=39%
GOBP_T_CELL_ACTIVATION_INVOLVED_IN_IMMUNE_RESPONSE	GOBP_T_CELL_ACTIVATION_INVOLVED_IN_IMMUNE_RESPONSE	103	0.557443	1.61929	0.0313725	0.280543	0.998	3245	tags=41%, list=21%, signal=51%
GOBP_POSITIVE_REGULATION_OF_PHAGOCYTOSIS	GOBP_POSITIVE_REGULATION_OF_PHAGOCYTOSIS	61	0.650982	1.61855	0.0177515	0.28092	0.998	3524	tags=66%, list=23%, signal=85%
GOBP_RAS_PROTEIN_SIGNAL_TRANSDUCTION	GOBP_RAS_PROTEIN_SIGNAL_TRANSDUCTION	315	0.395618	1.6179	0.011811	0.280967	0.998	3888	tags=38%, list=25%, signal=50%
GOBP_PRODUCTION_OF_MOLECULAR_MEDIATOR_OF_IMMUNE_RESPONSE	GOBP_PRODUCTION_OF_MOLECULAR_MEDIATOR_OF_IMMUNE_RESPONSE	174	0.550365	1.61745	0.0118812	0.280782	0.998	2978	tags=38%, list=19%, signal=47%
GOBP_INTERLEUKIN_2_PRODUCTION	GOBP_INTERLEUKIN_2_PRODUCTION	59	0.650816	1.61676	0.0324427	0.280937	0.998	3152	tags=59%, list=21%, signal=74%
GOBP_T_HELPER_17_TYPE_IMMUNE_RESPONSE	GOBP_T_HELPER_17_TYPE_IMMUNE_RESPONSE	32	0.65724	1.61653	0.0314342	0.280261	0.998	2783	tags=44%, list=18%, signal=53%
GOBP_POSITIVE_REGULATION_OF_T_CELL_MEDIATED_IMMUNITY	GOBP_POSITIVE_REGULATION_OF_T_CELL_MEDIATED_IMMUNITY	45	0.643609	1.61649	0.0273438	0.279132	0.998	3152	tags=53%, list=21%, signal=67%
GOBP_REGULATION_OF_GLIAL_CELL_MIGRATION	GOBP_REGULATION_OF_GLIAL_CELL_MIGRATION	15	0.817217	1.61625	0	0.278389	0.998	1269	tags=60%, list=8%, signal=65%
GOCC_T_TUBULE	GOCC_T_TUBULE	51	0.591973	1.61623	0.00391389	0.277211	0.998	2278	tags=37%, list=15%, signal=44%
GOCC_SECONDARY_LYSOSOME	GOCC_SECONDARY_LYSOSOME	16	0.665002	1.6158	0.0193798	0.27682	0.998	2842	tags=38%, list=19%, signal=46%
GOMF_CARGO_RECEPTOR_ACTIVITY	GOMF_CARGO_RECEPTOR_ACTIVITY	70	0.618714	1.61481	0.00792079	0.27777	0.998	2162	tags=44%, list=14%, signal=51%
GOBP_MICROGLIAL_CELL_ACTIVATION	GOBP_MICROGLIAL_CELL_ACTIVATION	41	0.723153	1.61475	0.0171756	0.276709	0.998	2261	tags=66%, list=15%, signal=77%
GOBP_REGULATION_OF_PROTEIN_LOCALIZATION_TO_CELL_SURFACE	GOBP_REGULATION_OF_PROTEIN_LOCALIZATION_TO_CELL_SURFACE	37	0.533404	1.61436	0.0143149	0.27633	0.998	1925	tags=24%, list=13%, signal=28%
GOBP_DENDRITIC_CELL_DIFFERENTIATION	GOBP_DENDRITIC_CELL_DIFFERENTIATION	42	0.660368	1.61427	0.0141414	0.275302	0.998	3535	tags=52%, list=23%, signal=68%
GOBP_PROTEIN_KINASE_B_SIGNALING	GOBP_PROTEIN_KINASE_B_SIGNALING	229	0.495601	1.61397	0.00570342	0.27481	0.998	2971	tags=34%, list=19%, signal=42%
GOBP_REGULATION_OF_T_CELL_ACTIVATION	GOBP_REGULATION_OF_T_CELL_ACTIVATION	298	0.563223	1.61388	0.0240481	0.273785	0.998	3017	tags=43%, list=20%, signal=53%
GOBP_POSITIVE_REGULATION_OF_PROTEIN_LOCALIZATION_TO_CELL_PERIPHERY	GOBP_POSITIVE_REGULATION_OF_PROTEIN_LOCALIZATION_TO_CELL_PERIPHERY	63	0.466015	1.61387	0.00782779	0.272631	0.998	3836	tags=40%, list=25%, signal=53%
GOMF_CYTOKINE_RECEPTOR_ACTIVITY	GOMF_CYTOKINE_RECEPTOR_ACTIVITY	90	0.629659	1.61318	0.00584795	0.272916	0.998	2941	tags=59%, list=19%, signal=72%
GOBP_MYELOID_DENDRITIC_CELL_ACTIVATION	GOBP_MYELOID_DENDRITIC_CELL_ACTIVATION	26	0.724958	1.61174	0.0120724	0.2749	0.998	2338	tags=54%, list=15%, signal=63%
GOBP_REGULATION_OF_HEMOPOIESIS	GOBP_REGULATION_OF_HEMOPOIESIS	345	0.49416	1.6117	0.0217822	0.273851	0.998	3166	tags=36%, list=21%, signal=44%
GOBP_REGULATION_OF_CELL_ACTIVATION	GOBP_REGULATION_OF_CELL_ACTIVATION	500	0.541481	1.61124	0.027451	0.273714	0.999	3017	tags=42%, list=20%, signal=51%
GOBP_CORONARY_VASCULATURE_DEVELOPMENT	GOBP_CORONARY_VASCULATURE_DEVELOPMENT	39	0.57485	1.61061	0.0210728	0.273986	0.999	2132	tags=33%, list=14%, signal=39%
GOBP_POSITIVE_REGULATION_OF_CELL_KILLING	GOBP_POSITIVE_REGULATION_OF_CELL_KILLING	55	0.71307	1.60993	0.0177515	0.274381	0.999	2263	tags=55%, list=15%, signal=64%
GOMF_ANTIGEN_BINDING	GOMF_ANTIGEN_BINDING	47	0.681074	1.60959	0.011811	0.274037	0.999	2309	tags=49%, list=15%, signal=57%
GOBP_ORGANISM_EMERGENCE_FROM_PROTECTIVE_STRUCTURE	GOBP_ORGANISM_EMERGENCE_FROM_PROTECTIVE_STRUCTURE	17	0.635834	1.60814	0.0209924	0.275957	0.999	2185	tags=35%, list=14%, signal=41%
GOCC_COATED_VESICLE_MEMBRANE	GOCC_COATED_VESICLE_MEMBRANE	164	0.428526	1.60795	0.00616016	0.275195	0.999	4060	tags=32%, list=26%, signal=43%
GOBP_INTERLEUKIN_1_BETA_PRODUCTION	GOBP_INTERLEUKIN_1_BETA_PRODUCTION	80	0.639726	1.60774	0.0210728	0.274463	0.999	3394	tags=54%, list=22%, signal=69%
GOBP_REGULATION_OF_NIK_NF_KAPPAB_SIGNALING	GOBP_REGULATION_OF_NIK_NF_KAPPAB_SIGNALING	85	0.534511	1.60674	0.0337302	0.275409	0.999	2934	tags=36%, list=19%, signal=45%
GOBP_DEFENSE_RESPONSE_TO_VIRUS	GOBP_DEFENSE_RESPONSE_TO_VIRUS	226	0.470836	1.60665	0.0430528	0.274507	0.999	4391	tags=42%, list=29%, signal=57%
GOBP_NEGATIVE_REGULATION_OF_ADAPTIVE_IMMUNE_RESPONSE	GOBP_NEGATIVE_REGULATION_OF_ADAPTIVE_IMMUNE_RESPONSE	51	0.630468	1.60661	0.00976562	0.27351	0.999	3152	tags=53%, list=21%, signal=66%
GOBP_REGULATION_OF_RHO_PROTEIN_SIGNAL_TRANSDUCTION	GOBP_REGULATION_OF_RHO_PROTEIN_SIGNAL_TRANSDUCTION	78	0.519491	1.60655	0.015748	0.272564	0.999	3586	tags=44%, list=23%, signal=57%
GOBP_ACTIVATION_OF_MAPKK_ACTIVITY	GOBP_ACTIVATION_OF_MAPKK_ACTIVITY	49	0.472834	1.6063	0.0212314	0.27203	0.999	3358	tags=31%, list=22%, signal=39%
GOBP_NEGATIVE_REGULATION_OF_DEFENSE_RESPONSE	GOBP_NEGATIVE_REGULATION_OF_DEFENSE_RESPONSE	173	0.52516	1.60626	0.0192308	0.271028	0.999	3382	tags=44%, list=22%, signal=56%
GOBP_POSITIVE_REGULATION_OF_CD4_POSITIVE_ALPHA_BETA_T_CELL_ACTIVATION	GOBP_POSITIVE_REGULATION_OF_CD4_POSITIVE_ALPHA_BETA_T_CELL_ACTIVATION	35	0.677119	1.60587	0.0234834	0.270769	0.999	3245	tags=66%, list=21%, signal=83%
GOBP_LONG_TERM_MEMORY	GOBP_LONG_TERM_MEMORY	32	0.61334	1.60554	0.00782779	0.270348	0.999	3036	tags=47%, list=20%, signal=58%
GOMF_PROTEIN_TYROSINE_KINASE_ACTIVITY	GOMF_PROTEIN_TYROSINE_KINASE_ACTIVITY	133	0.466605	1.60537	0.00769231	0.269771	1	2942	tags=33%, list=19%, signal=41%
GOBP_REGULATION_OF_MACROPHAGE_CHEMOTAXIS	GOBP_REGULATION_OF_MACROPHAGE_CHEMOTAXIS	23	0.616594	1.60513	0.0176125	0.269235	1	3145	tags=52%, list=20%, signal=66%
GOBP_POSITIVE_REGULATION_OF_PROTEOLYSIS_INVOLVED_IN_CELLULAR_PROTEIN_CATABOLIC_PROCESS	GOBP_POSITIVE_REGULATION_OF_PROTEOLYSIS_INVOLVED_IN_CELLULAR_PROTEIN_CATABOLIC_PROCESS	114	0.348753	1.60436	0.015748	0.269943	1	2491	tags=18%, list=16%, signal=22%
GOBP_B_CELL_RECEPTOR_SIGNALING_PATHWAY	GOBP_B_CELL_RECEPTOR_SIGNALING_PATHWAY	55	0.712081	1.60418	0.0262626	0.269284	1	2560	tags=55%, list=17%, signal=65%
GOMF_SCAVENGER_RECEPTOR_ACTIVITY	GOMF_SCAVENGER_RECEPTOR_ACTIVITY	42	0.677957	1.60391	0.00401606	0.268756	1	1617	tags=45%, list=11%, signal=50%
GOBP_ACTIVATION_OF_GTPASE_ACTIVITY	GOBP_ACTIVATION_OF_GTPASE_ACTIVITY	99	0.448826	1.60363	0.0142857	0.268303	1	2154	tags=23%, list=14%, signal=27%
GOCC_PLASMA_MEMBRANE_RAFT	GOCC_PLASMA_MEMBRANE_RAFT	100	0.531864	1.60361	0.00191939	0.26732	1	2011	tags=34%, list=13%, signal=39%
GOBP_REGULATION_OF_SUPEROXIDE_ANION_GENERATION	GOBP_REGULATION_OF_SUPEROXIDE_ANION_GENERATION	19	0.672788	1.60285	0.0139442	0.267833	1	3375	tags=63%, list=22%, signal=81%
GOBP_REGULATION_OF_T_CELL_MEDIATED_CYTOTOXICITY	GOBP_REGULATION_OF_T_CELL_MEDIATED_CYTOTOXICITY	32	0.707054	1.60243	0.0176125	0.267591	1	3152	tags=63%, list=21%, signal=78%
GOBP_REGULATION_OF_CELL_CELL_ADHESION	GOBP_REGULATION_OF_CELL_CELL_ADHESION	388	0.512709	1.60187	0.0234834	0.26782	1	3039	tags=39%, list=20%, signal=48%
GOBP_CIRCADIAN_SLEEP_WAKE_CYCLE_SLEEP	GOBP_CIRCADIAN_SLEEP_WAKE_CYCLE_SLEEP	19	0.641045	1.60127	0.00188324	0.26804	1	2833	tags=47%, list=18%, signal=58%
GOBP_ACTOMYOSIN_STRUCTURE_ORGANIZATION	GOBP_ACTOMYOSIN_STRUCTURE_ORGANIZATION	178	0.469681	1.60091	0.0196078	0.267824	1	3528	tags=40%, list=23%, signal=51%
GOCC_AUTOPHAGOSOME	GOCC_AUTOPHAGOSOME	88	0.364335	1.60064	0.0330097	0.267311	1	4790	tags=34%, list=31%, signal=49%
GOMF_NUCLEOTIDE_RECEPTOR_ACTIVITY	GOMF_NUCLEOTIDE_RECEPTOR_ACTIVITY	20	0.783652	1.60026	0.00387597	0.267168	1	2249	tags=70%, list=15%, signal=82%
GOBP_REGULATION_OF_T_CELL_MEDIATED_IMMUNITY	GOBP_REGULATION_OF_T_CELL_MEDIATED_IMMUNITY	70	0.633599	1.60013	0.0255906	0.266382	1	3152	tags=53%, list=21%, signal=66%
GOBP_REGULATION_OF_LYMPHOCYTE_ACTIVATION	GOBP_REGULATION_OF_LYMPHOCYTE_ACTIVATION	395	0.537105	1.60007	0.0299401	0.265529	1	3017	tags=42%, list=20%, signal=51%
GOBP_TOLL_LIKE_RECEPTOR_3_SIGNALING_PATHWAY	GOBP_TOLL_LIKE_RECEPTOR_3_SIGNALING_PATHWAY	18	0.618861	1.59988	0.0423077	0.264944	1	3348	tags=44%, list=22%, signal=57%
GOBP_REGULATION_OF_ALPHA_BETA_T_CELL_DIFFERENTIATION	GOBP_REGULATION_OF_ALPHA_BETA_T_CELL_DIFFERENTIATION	63	0.625104	1.59935	0.0261569	0.265107	1	3653	tags=56%, list=24%, signal=73%
GOBP_POSITIVE_REGULATION_OF_LEUKOCYTE_DEGRANULATION	GOBP_POSITIVE_REGULATION_OF_LEUKOCYTE_DEGRANULATION	22	0.623161	1.59934	0.0272374	0.264154	1	2330	tags=41%, list=15%, signal=48%
GOBP_CHEMOKINE_PRODUCTION	GOBP_CHEMOKINE_PRODUCTION	85	0.596833	1.5987	0.0117878	0.264449	1	2934	tags=46%, list=19%, signal=56%
GOBP_REGULATION_OF_NATURAL_KILLER_CELL_ACTIVATION	GOBP_REGULATION_OF_NATURAL_KILLER_CELL_ACTIVATION	32	0.622318	1.59852	0.0351562	0.263871	1	3811	tags=59%, list=25%, signal=79%
GOCC_AXONAL_GROWTH_CONE	GOCC_AXONAL_GROWTH_CONE	26	0.600322	1.59808	0.0176125	0.263985	1	3063	tags=46%, list=20%, signal=58%
GOBP_CELLULAR_RESPONSE_TO_AMYLOID_BETA	GOBP_CELLULAR_RESPONSE_TO_AMYLOID_BETA	35	0.620703	1.59808	0.01002	0.263043	1	3086	tags=49%, list=20%, signal=61%
GOBP_TOLL_LIKE_RECEPTOR_SIGNALING_PATHWAY	GOBP_TOLL_LIKE_RECEPTOR_SIGNALING_PATHWAY	141	0.499362	1.59794	0.0342052	0.262331	1	2550	tags=30%, list=17%, signal=35%
GOCC_SPECIFIC_GRANULE_MEMBRANE	GOCC_SPECIFIC_GRANULE_MEMBRANE	86	0.543883	1.59731	0.0397614	0.262707	1	3346	tags=40%, list=22%, signal=50%
GOBP_REGULATION_OF_PROTEIN_KINASE_A_SIGNALING	GOBP_REGULATION_OF_PROTEIN_KINASE_A_SIGNALING	20	0.650288	1.59729	0.00587084	0.261814	1	1790	tags=35%, list=12%, signal=40%
GOMF_LIGASE_ACTIVITY_FORMING_CARBON_SULFUR_BONDS	GOMF_LIGASE_ACTIVITY_FORMING_CARBON_SULFUR_BONDS	39	0.493868	1.59712	0.0207469	0.261224	1	2855	tags=33%, list=19%, signal=41%
GOBP_NEGATIVE_REGULATION_OF_EXOCYTOSIS	GOBP_NEGATIVE_REGULATION_OF_EXOCYTOSIS	26	0.656256	1.59711	0.00596422	0.260327	1	3086	tags=54%, list=20%, signal=67%
GOBP_REGULATION_OF_B_CELL_MEDIATED_IMMUNITY	GOBP_REGULATION_OF_B_CELL_MEDIATED_IMMUNITY	45	0.637725	1.597	0.0120968	0.259627	1	3152	tags=53%, list=21%, signal=67%
GOBP_NEGATIVE_REGULATION_OF_CYTOKINE_PRODUCTION	GOBP_NEGATIVE_REGULATION_OF_CYTOKINE_PRODUCTION	252	0.535749	1.59614	0.0158416	0.260519	1	3394	tags=44%, list=22%, signal=56%
GOBP_MUSCLE_CELL_PROLIFERATION	GOBP_MUSCLE_CELL_PROLIFERATION	168	0.532545	1.59597	0.0154739	0.259991	1	3572	tags=42%, list=23%, signal=54%
GOBP_REGULATION_OF_ACTIN_FILAMENT_ORGANIZATION	GOBP_REGULATION_OF_ACTIN_FILAMENT_ORGANIZATION	240	0.438065	1.59544	0.0151515	0.260267	1	3312	tags=33%, list=22%, signal=42%
GOBP_POSITIVE_REGULATION_OF_MACROPHAGE_MIGRATION	GOBP_POSITIVE_REGULATION_OF_MACROPHAGE_MIGRATION	22	0.673239	1.5943	0.0179283	0.261518	1	3145	tags=55%, list=20%, signal=68%
GOMF_AMYLOID_BETA_BINDING	GOMF_AMYLOID_BETA_BINDING	79	0.548551	1.59418	0.00578035	0.260886	1	3086	tags=39%, list=20%, signal=49%
GOBP_POSITIVE_REGULATION_OF_GTPASE_ACTIVITY	GOBP_POSITIVE_REGULATION_OF_GTPASE_ACTIVITY	354	0.400769	1.59355	0.0116505	0.261244	1	3458	tags=34%, list=23%, signal=42%
GOBP_POSITIVE_REGULATION_OF_ACTIVATED_T_CELL_PROLIFERATION	GOBP_POSITIVE_REGULATION_OF_ACTIVATED_T_CELL_PROLIFERATION	22	0.696885	1.59338	0.0121212	0.260673	1	2862	tags=50%, list=19%, signal=61%
GOBP_POSITIVE_REGULATION_OF_NOTCH_SIGNALING_PATHWAY	GOBP_POSITIVE_REGULATION_OF_NOTCH_SIGNALING_PATHWAY	50	0.487014	1.59234	0.01222	0.261829	1	2028	tags=20%, list=13%, signal=23%
GOBP_MEMBRANE_INVAGINATION	GOBP_MEMBRANE_INVAGINATION	67	0.519625	1.59115	0.0240964	0.263421	1	2836	tags=39%, list=18%, signal=47%
GOBP_CLATHRIN_COAT_ASSEMBLY	GOBP_CLATHRIN_COAT_ASSEMBLY	16	0.561749	1.59112	0.0217822	0.262622	1	2793	tags=31%, list=18%, signal=38%
GOBP_NEGATIVE_REGULATION_OF_LYMPHOCYTE_MEDIATED_IMMUNITY	GOBP_NEGATIVE_REGULATION_OF_LYMPHOCYTE_MEDIATED_IMMUNITY	40	0.641508	1.59082	0.0197628	0.262293	1	3152	tags=58%, list=21%, signal=72%
GOBP_ACTIN_FILAMENT_ORGANIZATION	GOBP_ACTIN_FILAMENT_ORGANIZATION	388	0.423531	1.59006	0.0168539	0.262847	1	3740	tags=36%, list=24%, signal=46%
GOBP_REGULATION_OF_LEUKOCYTE_PROLIFERATION	GOBP_REGULATION_OF_LEUKOCYTE_PROLIFERATION	221	0.576175	1.58943	0.0240481	0.263225	1	2609	tags=43%, list=17%, signal=51%
GOBP_NEGATIVE_REGULATION_OF_NIK_NF_KAPPAB_SIGNALING	GOBP_NEGATIVE_REGULATION_OF_NIK_NF_KAPPAB_SIGNALING	20	0.590669	1.58823	0.0326923	0.264651	1	4391	tags=55%, list=29%, signal=77%
GOBP_REGULATION_OF_PHOSPHOLIPASE_ACTIVITY	GOBP_REGULATION_OF_PHOSPHOLIPASE_ACTIVITY	66	0.602107	1.58786	0.0114068	0.264572	1	2842	tags=42%, list=19%, signal=52%
GOBP_LYMPHOID_PROGENITOR_CELL_DIFFERENTIATION	GOBP_LYMPHOID_PROGENITOR_CELL_DIFFERENTIATION	21	0.582682	1.58745	0.0248092	0.264557	1	1421	tags=24%, list=9%, signal=26%
GOBP_REGULATION_OF_INFLAMMATORY_RESPONSE	GOBP_REGULATION_OF_INFLAMMATORY_RESPONSE	292	0.546626	1.58654	0.0117647	0.265663	1	3231	tags=43%, list=21%, signal=54%
GOBP_REGULATION_OF_RESPONSE_TO_CYTOKINE_STIMULUS	GOBP_REGULATION_OF_RESPONSE_TO_CYTOKINE_STIMULUS	154	0.456536	1.58535	0.0368217	0.267068	1	4279	tags=40%, list=28%, signal=55%
GOBP_INTERLEUKIN_6_PRODUCTION	GOBP_INTERLEUKIN_6_PRODUCTION	125	0.582864	1.58454	0.0213592	0.26789	1	2934	tags=46%, list=19%, signal=56%
GOBP_NEGATIVE_REGULATION_OF_ENDOTHELIAL_CELL_PROLIFERATION	GOBP_NEGATIVE_REGULATION_OF_ENDOTHELIAL_CELL_PROLIFERATION	35	0.607658	1.58374	0.0152091	0.268606	1	3352	tags=54%, list=22%, signal=69%
GOBP_NEGATIVE_REGULATION_OF_LEUKOCYTE_MEDIATED_CYTOTOXICITY	GOBP_NEGATIVE_REGULATION_OF_LEUKOCYTE_MEDIATED_CYTOTOXICITY	17	0.732457	1.58363	0.0209924	0.268013	1	3962	tags=82%, list=26%, signal=111%
GOBP_ACTIN_FILAMENT_BUNDLE_ORGANIZATION	GOBP_ACTIN_FILAMENT_BUNDLE_ORGANIZATION	142	0.43494	1.58122	0.0227704	0.272075	1	3606	tags=39%, list=23%, signal=50%
GOBP_POSITIVE_REGULATION_OF_LEUKOCYTE_ADHESION_TO_VASCULAR_ENDOTHELIAL_CELL	GOBP_POSITIVE_REGULATION_OF_LEUKOCYTE_ADHESION_TO_VASCULAR_ENDOTHELIAL_CELL	20	0.70101	1.5811	0.0212355	0.271389	1	2861	tags=60%, list=19%, signal=74%
GOMF_SIALIC_ACID_BINDING	GOMF_SIALIC_ACID_BINDING	18	0.801267	1.58102	0.0059761	0.270637	1	1944	tags=67%, list=13%, signal=76%
GOMF_MHC_CLASS_II_PROTEIN_COMPLEX_BINDING	GOMF_MHC_CLASS_II_PROTEIN_COMPLEX_BINDING	15	0.678867	1.58018	0.0308008	0.271467	1	1571	tags=40%, list=10%, signal=45%
GOCC_AZUROPHIL_GRANULE	GOCC_AZUROPHIL_GRANULE	139	0.416193	1.57953	0.0441767	0.272011	1	4712	tags=40%, list=31%, signal=58%
GOBP_CIRCADIAN_SLEEP_WAKE_CYCLE	GOBP_CIRCADIAN_SLEEP_WAKE_CYCLE	23	0.613999	1.57931	0.00776699	0.271598	1	2833	tags=43%, list=18%, signal=53%
GOBP_NEGATIVE_REGULATION_OF_MYOBLAST_DIFFERENTIATION	GOBP_NEGATIVE_REGULATION_OF_MYOBLAST_DIFFERENTIATION	23	0.669468	1.57921	0.00195695	0.270917	1	3375	tags=61%, list=22%, signal=78%
GOCC_CLATHRIN_COATED_VESICLE_MEMBRANE	GOCC_CLATHRIN_COATED_VESICLE_MEMBRANE	106	0.492622	1.5789	0.00206612	0.270617	1	4026	tags=42%, list=26%, signal=56%
GOBP_LEUKOCYTE_TETHERING_OR_ROLLING	GOBP_LEUKOCYTE_TETHERING_OR_ROLLING	30	0.696531	1.57885	0.0093985	0.269827	1	2314	tags=53%, list=15%, signal=63%
GOMF_PHOSPHATIDYLINOSITOL_3_4_BISPHOSPHATE_BINDING	GOMF_PHOSPHATIDYLINOSITOL_3_4_BISPHOSPHATE_BINDING	26	0.532863	1.57873	0.027833	0.269247	1	3474	tags=42%, list=23%, signal=55%
GOBP_POSITIVE_REGULATION_OF_SMOOTH_MUSCLE_CELL_PROLIFERATION	GOBP_POSITIVE_REGULATION_OF_SMOOTH_MUSCLE_CELL_PROLIFERATION	78	0.543022	1.57859	0.0133588	0.268656	1	3301	tags=42%, list=21%, signal=54%
GOMF_CARGO_ADAPTOR_ACTIVITY	GOMF_CARGO_ADAPTOR_ACTIVITY	17	0.513825	1.5775	0.0610236	0.27006	1	3903	tags=35%, list=25%, signal=47%
GOBP_TRANSCYTOSIS	GOBP_TRANSCYTOSIS	19	0.61849	1.57722	0.0246914	0.269801	1	1454	tags=26%, list=9%, signal=29%
GOBP_MEMBRANE_RAFT_ORGANIZATION	GOBP_MEMBRANE_RAFT_ORGANIZATION	23	0.58617	1.57712	0.0361446	0.269175	1	3575	tags=52%, list=23%, signal=68%
GOBP_NEURON_MATURATION	GOBP_NEURON_MATURATION	44	0.547287	1.57709	0.0280561	0.268394	1	1863	tags=30%, list=12%, signal=34%
GOBP_REGULATION_OF_CYSTEINE_TYPE_ENDOPEPTIDASE_ACTIVITY	GOBP_REGULATION_OF_CYSTEINE_TYPE_ENDOPEPTIDASE_ACTIVITY	206	0.428359	1.57696	0.0156863	0.267807	1	3021	tags=32%, list=20%, signal=39%
GOBP_POSITIVE_REGULATION_OF_ALPHA_BETA_T_CELL_DIFFERENTIATION	GOBP_POSITIVE_REGULATION_OF_ALPHA_BETA_T_CELL_DIFFERENTIATION	45	0.626921	1.57624	0.0324544	0.268432	1	3245	tags=56%, list=21%, signal=70%
GOBP_REACTIVE_OXYGEN_SPECIES_BIOSYNTHETIC_PROCESS	GOBP_REACTIVE_OXYGEN_SPECIES_BIOSYNTHETIC_PROCESS	103	0.52065	1.57563	0.0115607	0.268926	1	2710	tags=32%, list=18%, signal=39%
GOBP_REGULATION_OF_LIPOPOLYSACCHARIDE_MEDIATED_SIGNALING_PATHWAY	GOBP_REGULATION_OF_LIPOPOLYSACCHARIDE_MEDIATED_SIGNALING_PATHWAY	22	0.655479	1.57553	0.0155945	0.268322	1	2826	tags=50%, list=18%, signal=61%
GOBP_REGULATION_OF_PHOSPHOLIPASE_C_ACTIVITY	GOBP_REGULATION_OF_PHOSPHOLIPASE_C_ACTIVITY	46	0.619567	1.57546	0.0150943	0.267659	1	2492	tags=43%, list=16%, signal=52%
GOMF_NADPLUS_ADP_RIBOSYLTRANSFERASE_ACTIVITY	GOMF_NADPLUS_ADP_RIBOSYLTRANSFERASE_ACTIVITY	24	0.515753	1.57536	0.0254902	0.267049	1	2829	tags=21%, list=18%, signal=25%
GOBP_SMOOTH_MUSCLE_CELL_PROLIFERATION	GOBP_SMOOTH_MUSCLE_CELL_PROLIFERATION	122	0.546988	1.57523	0.026975	0.266473	1	3572	tags=45%, list=23%, signal=58%
GOBP_CELL_JUNCTION_DISASSEMBLY	GOBP_CELL_JUNCTION_DISASSEMBLY	20	0.687088	1.57406	0.0322581	0.268072	1	3139	tags=60%, list=20%, signal=75%
GOBP_AUTOPHAGOSOME_MATURATION	GOBP_AUTOPHAGOSOME_MATURATION	35	0.4001	1.57377	0.0512821	0.267831	1	6340	tags=57%, list=41%, signal=97%
GOBP_T_CELL_DIFFERENTIATION_INVOLVED_IN_IMMUNE_RESPONSE	GOBP_T_CELL_DIFFERENTIATION_INVOLVED_IN_IMMUNE_RESPONSE	69	0.588773	1.57359	0.0308285	0.267331	1	3629	tags=52%, list=24%, signal=68%
GOBP_RESPONSE_TO_VIRUS	GOBP_RESPONSE_TO_VIRUS	308	0.449041	1.57348	0.0411765	0.266738	1	4391	tags=40%, list=29%, signal=55%
GOBP_MACROPHAGE_ACTIVATION	GOBP_MACROPHAGE_ACTIVATION	91	0.609678	1.57345	0.0175097	0.265995	1	3211	tags=55%, list=21%, signal=69%
GOMF_CYCLIN_DEPENDENT_PROTEIN_KINASE_ACTIVITY	GOMF_CYCLIN_DEPENDENT_PROTEIN_KINASE_ACTIVITY	25	0.490855	1.57305	0.0225873	0.265874	1	389	tags=12%, list=3%, signal=12%
GOMF_PHOSPHATASE_BINDING	GOMF_PHOSPHATASE_BINDING	186	0.381796	1.57094	0.0117188	0.269301	1	3850	tags=30%, list=25%, signal=39%
GOMF_HORMONE_BINDING	GOMF_HORMONE_BINDING	78	0.547858	1.57068	0.00970874	0.269092	1	2651	tags=35%, list=17%, signal=42%
GOBP_POSITIVE_REGULATION_OF_TRIGLYCERIDE_METABOLIC_PROCESS	GOBP_POSITIVE_REGULATION_OF_TRIGLYCERIDE_METABOLIC_PROCESS	21	0.631896	1.57009	0.0301205	0.269522	1	2110	tags=38%, list=14%, signal=44%
GOBP_CALCIUM_ION_TRANSPORT	GOBP_CALCIUM_ION_TRANSPORT	359	0.481342	1.56903	0.00391389	0.270776	1	2683	tags=30%, list=17%, signal=36%
GOCC_ENDOLYSOSOME_MEMBRANE	GOCC_ENDOLYSOSOME_MEMBRANE	15	0.696839	1.56856	0.0198807	0.270944	1	1779	tags=27%, list=12%, signal=30%
GOBP_CELLULAR_RESPONSE_TO_MECHANICAL_STIMULUS	GOBP_CELLULAR_RESPONSE_TO_MECHANICAL_STIMULUS	71	0.503691	1.56804	0.0239044	0.271204	1	3174	tags=39%, list=21%, signal=49%
GOBP_POSITIVE_REGULATION_OF_PHOSPHATASE_ACTIVITY	GOBP_POSITIVE_REGULATION_OF_PHOSPHATASE_ACTIVITY	31	0.609104	1.56786	0.0155642	0.270745	1	2790	tags=42%, list=18%, signal=51%
GOBP_REGULATION_OF_LEUKOCYTE_ADHESION_TO_VASCULAR_ENDOTHELIAL_CELL	GOBP_REGULATION_OF_LEUKOCYTE_ADHESION_TO_VASCULAR_ENDOTHELIAL_CELL	27	0.671253	1.56761	0.019685	0.270368	1	2358	tags=52%, list=15%, signal=61%
GOCC_LATE_ENDOSOME_MEMBRANE	GOCC_LATE_ENDOSOME_MEMBRANE	113	0.361621	1.5676	0.0458891	0.26959	1	5223	tags=37%, list=34%, signal=56%
GOBP_REGULATION_OF_T_CELL_DIFFERENTIATION	GOBP_REGULATION_OF_T_CELL_DIFFERENTIATION	136	0.560653	1.56741	0.0264228	0.269184	1	3288	tags=43%, list=21%, signal=54%
GOBP_REGULATION_OF_T_HELPER_CELL_DIFFERENTIATION	GOBP_REGULATION_OF_T_HELPER_CELL_DIFFERENTIATION	37	0.639642	1.56676	0.0216963	0.269869	1	4198	tags=65%, list=27%, signal=89%
GOMF_RECEPTOR_TYROSINE_KINASE_BINDING	GOMF_RECEPTOR_TYROSINE_KINASE_BINDING	66	0.444672	1.5665	0.0042735	0.269604	1	2189	tags=23%, list=14%, signal=26%
GOBP_REGULATION_OF_LEUKOCYTE_DIFFERENTIATION	GOBP_REGULATION_OF_LEUKOCYTE_DIFFERENTIATION	257	0.520522	1.56636	0.028	0.269148	1	3584	tags=45%, list=23%, signal=57%
GOBP_RELEASE_OF_SEQUESTERED_CALCIUM_ION_INTO_CYTOSOL_BY_ENDOPLASMIC_RETICULUM	GOBP_RELEASE_OF_SEQUESTERED_CALCIUM_ION_INTO_CYTOSOL_BY_ENDOPLASMIC_RETICULUM	30	0.673778	1.56579	0.00992064	0.26953	1	2010	tags=47%, list=13%, signal=54%
GOBP_REGULATION_OF_ACTOMYOSIN_STRUCTURE_ORGANIZATION	GOBP_REGULATION_OF_ACTOMYOSIN_STRUCTURE_ORGANIZATION	90	0.453859	1.56552	0.0256917	0.269231	1	3528	tags=37%, list=23%, signal=47%
GOMF_CHEMOKINE_BINDING	GOMF_CHEMOKINE_BINDING	28	0.745768	1.56517	0.0138614	0.269114	1	1258	tags=46%, list=8%, signal=50%
GOBP_B_CELL_PROLIFERATION	GOBP_B_CELL_PROLIFERATION	90	0.612476	1.5651	0.0359281	0.268483	1	2014	tags=34%, list=13%, signal=39%
GOBP_RESPONSE_TO_PROSTAGLANDIN_E	GOBP_RESPONSE_TO_PROSTAGLANDIN_E	22	0.667897	1.5649	0.0219561	0.268115	1	1512	tags=36%, list=10%, signal=40%
GOBP_RESPONSE_TO_FLUID_SHEAR_STRESS	GOBP_RESPONSE_TO_FLUID_SHEAR_STRESS	29	0.560758	1.56444	0.04	0.268235	1	4754	tags=59%, list=31%, signal=85%
GOBP_REGULATION_OF_CD4_POSITIVE_ALPHA_BETA_T_CELL_DIFFERENTIATION	GOBP_REGULATION_OF_CD4_POSITIVE_ALPHA_BETA_T_CELL_DIFFERENTIATION	47	0.651743	1.56417	0.0299401	0.268041	1	3584	tags=60%, list=23%, signal=77%
GOBP_HEART_FIELD_SPECIFICATION	GOBP_HEART_FIELD_SPECIFICATION	17	0.711047	1.56328	0.0217822	0.269057	1	2790	tags=53%, list=18%, signal=65%
GOBP_B_CELL_ACTIVATION_INVOLVED_IN_IMMUNE_RESPONSE	GOBP_B_CELL_ACTIVATION_INVOLVED_IN_IMMUNE_RESPONSE	71	0.550254	1.56263	0.0546875	0.269812	1	2032	tags=31%, list=13%, signal=36%
GOBP_POSITIVE_REGULATION_OF_FILOPODIUM_ASSEMBLY	GOBP_POSITIVE_REGULATION_OF_FILOPODIUM_ASSEMBLY	25	0.561135	1.56263	0.043222	0.269052	1	2915	tags=28%, list=19%, signal=35%
GOBP_MYELOID_CELL_DIFFERENTIATION	GOBP_MYELOID_CELL_DIFFERENTIATION	348	0.420736	1.56233	0.0195695	0.268983	1	3211	tags=30%, list=21%, signal=37%
GOBP_POSITIVE_REGULATION_OF_INFLAMMATORY_RESPONSE	GOBP_POSITIVE_REGULATION_OF_INFLAMMATORY_RESPONSE	116	0.592596	1.5622	0.0119048	0.268446	1	3285	tags=47%, list=21%, signal=59%
GOCC_RECEPTOR_COMPLEX	GOCC_RECEPTOR_COMPLEX	385	0.494823	1.56156	0.003861	0.268947	1	2790	tags=35%, list=18%, signal=41%
GOMF_ATPASE_COUPLED_INTRAMEMBRANE_LIPID_TRANSPORTER_ACTIVITY	GOMF_ATPASE_COUPLED_INTRAMEMBRANE_LIPID_TRANSPORTER_ACTIVITY	25	0.595674	1.56146	0.0214844	0.268449	1	2836	tags=48%, list=18%, signal=59%
GOBP_CELLULAR_RESPONSE_TO_BIOTIC_STIMULUS	GOBP_CELLULAR_RESPONSE_TO_BIOTIC_STIMULUS	202	0.535959	1.56097	0.0294118	0.268711	1	3117	tags=39%, list=20%, signal=48%
GOBP_METAL_ION_TRANSPORT	GOBP_METAL_ION_TRANSPORT	431	0.464353	1.56046	0.00391389	0.268907	1	2686	tags=29%, list=17%, signal=34%
GOBP_REGULATION_OF_OXIDOREDUCTASE_ACTIVITY	GOBP_REGULATION_OF_OXIDOREDUCTASE_ACTIVITY	92	0.455858	1.55934	0.0113636	0.270479	1	3472	tags=32%, list=23%, signal=40%
GOBP_REGULATION_OF_CELL_KILLING	GOBP_REGULATION_OF_CELL_KILLING	85	0.639518	1.55931	0.0338645	0.269771	1	2370	tags=47%, list=15%, signal=55%
GOBP_POSITIVE_REGULATION_OF_PATTERN_RECOGNITION_RECEPTOR_SIGNALING_PATHWAY	GOBP_POSITIVE_REGULATION_OF_PATTERN_RECOGNITION_RECEPTOR_SIGNALING_PATHWAY	38	0.543725	1.55929	0.0497018	0.269064	1	1679	tags=29%, list=11%, signal=32%
GOBP_NEGATIVE_REGULATION_OF_ALPHA_BETA_T_CELL_DIFFERENTIATION	GOBP_NEGATIVE_REGULATION_OF_ALPHA_BETA_T_CELL_DIFFERENTIATION	25	0.602775	1.5582	0.0471513	0.270634	1	2491	tags=36%, list=16%, signal=43%
GOBP_ALPHA_BETA_T_CELL_PROLIFERATION	GOBP_ALPHA_BETA_T_CELL_PROLIFERATION	31	0.669166	1.5582	0.0360721	0.269902	1	2280	tags=52%, list=15%, signal=60%
GOBP_REGULATION_OF_METAL_ION_TRANSPORT	GOBP_REGULATION_OF_METAL_ION_TRANSPORT	215	0.502188	1.55783	0.00384615	0.269866	1	2628	tags=35%, list=17%, signal=41%
GOBP_POSITIVE_REGULATION_OF_EPITHELIAL_CELL_MIGRATION	GOBP_POSITIVE_REGULATION_OF_EPITHELIAL_CELL_MIGRATION	137	0.488291	1.55768	0.0257426	0.269427	1	3536	tags=39%, list=23%, signal=50%
GOBP_REGULATION_OF_SMALL_GTPASE_MEDIATED_SIGNAL_TRANSDUCTION	GOBP_REGULATION_OF_SMALL_GTPASE_MEDIATED_SIGNAL_TRANSDUCTION	303	0.392499	1.55768	0.0136187	0.268716	1	3771	tags=39%, list=25%, signal=51%
GOBP_TRANSFORMING_GROWTH_FACTOR_BETA_RECEPTOR_SIGNALING_PATHWAY	GOBP_TRANSFORMING_GROWTH_FACTOR_BETA_RECEPTOR_SIGNALING_PATHWAY	182	0.429119	1.55747	0.0271318	0.268428	1	2676	tags=24%, list=17%, signal=29%
GOMF_CYTOKINE_BINDING	GOMF_CYTOKINE_BINDING	126	0.57498	1.55729	0.019685	0.268035	1	3204	tags=51%, list=21%, signal=64%
GOBP_POSITIVE_REGULATION_OF_DEPHOSPHORYLATION	GOBP_POSITIVE_REGULATION_OF_DEPHOSPHORYLATION	53	0.526125	1.55708	0.0176817	0.267776	1	3984	tags=51%, list=26%, signal=69%
GOBP_REGULATION_OF_PROTEIN_DEACETYLATION	GOBP_REGULATION_OF_PROTEIN_DEACETYLATION	40	0.429577	1.55677	0.0350195	0.267703	1	3211	tags=28%, list=21%, signal=35%
GOBP_POSITIVE_REGULATION_OF_FAT_CELL_DIFFERENTIATION	GOBP_POSITIVE_REGULATION_OF_FAT_CELL_DIFFERENTIATION	58	0.527902	1.55668	0.0238569	0.267176	1	3287	tags=36%, list=21%, signal=46%
GOBP_REGULATION_OF_CYTOSOLIC_CALCIUM_ION_CONCENTRATION	GOBP_REGULATION_OF_CYTOSOLIC_CALCIUM_ION_CONCENTRATION	316	0.526258	1.55663	0.00196078	0.266578	1	2681	tags=36%, list=17%, signal=43%
GOBP_CELL_KILLING	GOBP_CELL_KILLING	148	0.575671	1.55625	0.0223124	0.266588	1	2629	tags=39%, list=17%, signal=47%
GOBP_SEGMENT_SPECIFICATION	GOBP_SEGMENT_SPECIFICATION	15	0.705819	1.55608	0.0139721	0.266214	1	2724	tags=47%, list=18%, signal=57%
GOBP_REGULATION_OF_HISTONE_DEACETYLATION	GOBP_REGULATION_OF_HISTONE_DEACETYLATION	26	0.447215	1.55594	0.046748	0.265801	1	2032	tags=15%, list=13%, signal=18%
GOCC_CLATHRIN_COATED_ENDOCYTIC_VESICLE_MEMBRANE	GOCC_CLATHRIN_COATED_ENDOCYTIC_VESICLE_MEMBRANE	33	0.618908	1.55542	0.0165975	0.266033	1	3066	tags=39%, list=20%, signal=49%
GOBP_POSITIVE_REGULATION_OF_CYSTEINE_TYPE_ENDOPEPTIDASE_ACTIVITY	GOBP_POSITIVE_REGULATION_OF_CYSTEINE_TYPE_ENDOPEPTIDASE_ACTIVITY	136	0.440348	1.55509	0.0181452	0.266011	1	3365	tags=35%, list=22%, signal=44%
GOBP_CELLULAR_RESPONSE_TO_MOLECULE_OF_BACTERIAL_ORIGIN	GOBP_CELLULAR_RESPONSE_TO_MOLECULE_OF_BACTERIAL_ORIGIN	180	0.557962	1.55502	0.0275049	0.265447	1	3117	tags=42%, list=20%, signal=52%
GOBP_DEPHOSPHORYLATION	GOBP_DEPHOSPHORYLATION	422	0.33354	1.55455	0.00377358	0.265674	1	3115	tags=23%, list=20%, signal=28%
GOBP_POSITIVE_REGULATION_OF_INTERLEUKIN_12_PRODUCTION	GOBP_POSITIVE_REGULATION_OF_INTERLEUKIN_12_PRODUCTION	38	0.666832	1.55428	0.0253411	0.265558	1	1299	tags=37%, list=8%, signal=40%
GOBP_POSITIVE_REGULATION_OF_ENDOTHELIAL_CELL_MIGRATION	GOBP_POSITIVE_REGULATION_OF_ENDOTHELIAL_CELL_MIGRATION	96	0.513354	1.55358	0.0390625	0.266172	1	3536	tags=40%, list=23%, signal=51%
GOMF_PEPTIDASE_ACTIVATOR_ACTIVITY_INVOLVED_IN_APOPTOTIC_PROCESS	GOMF_PEPTIDASE_ACTIVATOR_ACTIVITY_INVOLVED_IN_APOPTOTIC_PROCESS	17	0.613581	1.55317	0.0393375	0.266257	1	2369	tags=47%, list=15%, signal=56%
GOBP_MEMBRANE_DEPOLARIZATION_DURING_CARDIAC_MUSCLE_CELL_ACTION_POTENTIAL	GOBP_MEMBRANE_DEPOLARIZATION_DURING_CARDIAC_MUSCLE_CELL_ACTION_POTENTIAL	21	0.716898	1.55258	0.0094162	0.266699	1	2010	tags=48%, list=13%, signal=55%
GOBP_POSITIVE_REGULATION_OF_ANTIGEN_RECEPTOR_MEDIATED_SIGNALING_PATHWAY	GOBP_POSITIVE_REGULATION_OF_ANTIGEN_RECEPTOR_MEDIATED_SIGNALING_PATHWAY	18	0.761339	1.55179	0.0333333	0.267644	1	2136	tags=50%, list=14%, signal=58%
GOBP_NEGATIVE_REGULATION_OF_CD4_POSITIVE_ALPHA_BETA_T_CELL_DIFFERENTIATION	GOBP_NEGATIVE_REGULATION_OF_CD4_POSITIVE_ALPHA_BETA_T_CELL_DIFFERENTIATION	21	0.624564	1.55132	0.0389105	0.267816	1	2491	tags=38%, list=16%, signal=45%
GOBP_POSITIVE_REGULATION_OF_B_CELL_DIFFERENTIATION	GOBP_POSITIVE_REGULATION_OF_B_CELL_DIFFERENTIATION	15	0.727788	1.55123	0.0452756	0.267284	1	2248	tags=53%, list=15%, signal=62%
GOBP_CELLULAR_RESPONSE_TO_GROWTH_HORMONE_STIMULUS	GOBP_CELLULAR_RESPONSE_TO_GROWTH_HORMONE_STIMULUS	23	0.561233	1.55119	0.0453649	0.266698	1	3182	tags=48%, list=21%, signal=60%
GOBP_POSITIVE_REGULATION_OF_HEMOPOIESIS	GOBP_POSITIVE_REGULATION_OF_HEMOPOIESIS	144	0.531781	1.55099	0.0374016	0.266347	1	3535	tags=49%, list=23%, signal=63%
GOBP_INTEGRIN_MEDIATED_SIGNALING_PATHWAY	GOBP_INTEGRIN_MEDIATED_SIGNALING_PATHWAY	97	0.51834	1.55074	0.0350195	0.266144	1	3010	tags=37%, list=20%, signal=46%
GOBP_PROTEIN_ADP_RIBOSYLATION	GOBP_PROTEIN_ADP_RIBOSYLATION	31	0.48879	1.5504	0.0355731	0.26614	1	3211	tags=23%, list=21%, signal=28%
GOBP_HORMONE_MEDIATED_SIGNALING_PATHWAY	GOBP_HORMONE_MEDIATED_SIGNALING_PATHWAY	169	0.420604	1.5504	0.00205339	0.265476	1	2203	tags=19%, list=14%, signal=22%
GOBP_MHC_CLASS_II_BIOSYNTHETIC_PROCESS	GOBP_MHC_CLASS_II_BIOSYNTHETIC_PROCESS	17	0.703087	1.55021	0.0247148	0.265168	1	3211	tags=53%, list=21%, signal=67%
GOBP_REGULATION_OF_PROTEIN_TARGETING_TO_MEMBRANE	GOBP_REGULATION_OF_PROTEIN_TARGETING_TO_MEMBRANE	23	0.512091	1.54995	0.0398406	0.265081	1	3084	tags=35%, list=20%, signal=43%
GOBP_CELL_VOLUME_HOMEOSTASIS	GOBP_CELL_VOLUME_HOMEOSTASIS	29	0.511437	1.54968	0.0247619	0.264941	1	2571	tags=24%, list=17%, signal=29%
GOMF_C_ACYLTRANSFERASE_ACTIVITY	GOMF_C_ACYLTRANSFERASE_ACTIVITY	18	0.575637	1.5494	0.0382409	0.264731	1	939	tags=22%, list=6%, signal=24%
GOBP_TYROSINE_PHOSPHORYLATION_OF_STAT_PROTEIN	GOBP_TYROSINE_PHOSPHORYLATION_OF_STAT_PROTEIN	74	0.546762	1.54932	0.0175097	0.264234	1	2125	tags=31%, list=14%, signal=36%
GOBP_RHO_PROTEIN_SIGNAL_TRANSDUCTION	GOBP_RHO_PROTEIN_SIGNAL_TRANSDUCTION	124	0.455714	1.5493	0.030888	0.263616	1	3725	tags=39%, list=24%, signal=51%
GOCC_PHAGOCYTIC_CUP	GOCC_PHAGOCYTIC_CUP	23	0.626852	1.54913	0.0493097	0.26327	1	3789	tags=70%, list=25%, signal=92%
GOBP_INTERLEUKIN_1_PRODUCTION	GOBP_INTERLEUKIN_1_PRODUCTION	94	0.605029	1.54892	0.0357143	0.263062	1	3285	tags=50%, list=21%, signal=63%
GOBP_REGULATION_OF_LIPASE_ACTIVITY	GOBP_REGULATION_OF_LIPASE_ACTIVITY	89	0.549243	1.54885	0.0174757	0.262535	1	2492	tags=37%, list=16%, signal=44%
GOBP_REGULATION_OF_FATTY_ACID_OXIDATION	GOBP_REGULATION_OF_FATTY_ACID_OXIDATION	32	0.573973	1.54815	0.0159681	0.263227	1	1853	tags=31%, list=12%, signal=35%
GOBP_ANTIGEN_PROCESSING_AND_PRESENTATION	GOBP_ANTIGEN_PROCESSING_AND_PRESENTATION	216	0.411056	1.54807	0.0745968	0.262784	1	2230	tags=21%, list=15%, signal=25%
GOBP_REGULATION_OF_PHAGOCYTOSIS	GOBP_REGULATION_OF_PHAGOCYTOSIS	85	0.570558	1.548	0.0294118	0.262262	1	3524	tags=54%, list=23%, signal=70%
GOBP_REGULATION_OF_CIRCADIAN_SLEEP_WAKE_CYCLE	GOBP_REGULATION_OF_CIRCADIAN_SLEEP_WAKE_CYCLE	18	0.656956	1.5478	0.0175439	0.262016	1	1321	tags=33%, list=9%, signal=36%
GOBP_ANTIGEN_PROCESSING_AND_PRESENTATION_OF_ENDOGENOUS_ANTIGEN	GOBP_ANTIGEN_PROCESSING_AND_PRESENTATION_OF_ENDOGENOUS_ANTIGEN	23	0.695422	1.54743	0.0205761	0.262073	1	1882	tags=39%, list=12%, signal=45%
GOBP_REGULATION_OF_T_HELPER_17_TYPE_IMMUNE_RESPONSE	GOBP_REGULATION_OF_T_HELPER_17_TYPE_IMMUNE_RESPONSE	21	0.661739	1.54722	0.0453649	0.261858	1	3245	tags=48%, list=21%, signal=60%
GOBP_POSITIVE_REGULATION_OF_CELLULAR_PROTEIN_CATABOLIC_PROCESS	GOBP_POSITIVE_REGULATION_OF_CELLULAR_PROTEIN_CATABOLIC_PROCESS	135	0.351364	1.54718	0.025641	0.261291	1	2491	tags=19%, list=16%, signal=22%
GOBP_POSITIVE_REGULATION_OF_LAMELLIPODIUM_ASSEMBLY	GOBP_POSITIVE_REGULATION_OF_LAMELLIPODIUM_ASSEMBLY	27	0.490913	1.54698	0.03	0.261029	1	3472	tags=33%, list=23%, signal=43%
GOBP_DOPAMINE_METABOLIC_PROCESS	GOBP_DOPAMINE_METABOLIC_PROCESS	34	0.569411	1.54687	0.0214008	0.260618	1	2834	tags=38%, list=18%, signal=47%
GOBP_REGULATION_OF_MYOBLAST_DIFFERENTIATION	GOBP_REGULATION_OF_MYOBLAST_DIFFERENTIATION	46	0.575275	1.54684	0.016	0.260038	1	3375	tags=48%, list=22%, signal=61%
GOBP_INTERLEUKIN_10_PRODUCTION	GOBP_INTERLEUKIN_10_PRODUCTION	53	0.631109	1.54654	0.0434783	0.260031	1	2248	tags=43%, list=15%, signal=51%
GOBP_POSITIVE_REGULATION_OF_REACTIVE_OXYGEN_SPECIES_BIOSYNTHETIC_PROCESS	GOBP_POSITIVE_REGULATION_OF_REACTIVE_OXYGEN_SPECIES_BIOSYNTHETIC_PROCESS	46	0.57553	1.54636	0.0315582	0.259744	1	2106	tags=33%, list=14%, signal=38%
GOBP_LEUKOCYTE_MIGRATION	GOBP_LEUKOCYTE_MIGRATION	400	0.517826	1.54617	0.0232108	0.259501	1	3011	tags=41%, list=20%, signal=50%
GOBP_REGULATION_OF_CALCIUM_ION_TRANSPORT_INTO_CYTOSOL	GOBP_REGULATION_OF_CALCIUM_ION_TRANSPORT_INTO_CYTOSOL	86	0.546411	1.54616	0.00956023	0.258892	1	2615	tags=41%, list=17%, signal=49%
GOBP_SEROTONIN_TRANSPORT	GOBP_SEROTONIN_TRANSPORT	20	0.712403	1.54584	0.00988142	0.258797	1	1705	tags=50%, list=11%, signal=56%
GOBP_NIK_NF_KAPPAB_SIGNALING	GOBP_NIK_NF_KAPPAB_SIGNALING	155	0.407459	1.54562	0.0658683	0.258535	1	3021	tags=24%, list=20%, signal=29%
GOMF_FLAVIN_ADENINE_DINUCLEOTIDE_BINDING	GOMF_FLAVIN_ADENINE_DINUCLEOTIDE_BINDING	77	0.470201	1.54547	0.0165289	0.258137	1	2436	tags=26%, list=16%, signal=31%
GOMF_PROTEIN_TYROSINE_KINASE_BINDING	GOMF_PROTEIN_TYROSINE_KINASE_BINDING	92	0.445058	1.54531	0.0161943	0.257864	1	3204	tags=32%, list=21%, signal=40%
GOBP_POSITIVE_REGULATION_OF_JNK_CASCADE	GOBP_POSITIVE_REGULATION_OF_JNK_CASCADE	82	0.497583	1.54526	0.0157791	0.257368	1	3237	tags=38%, list=21%, signal=48%
GOBP_B_CELL_MEDIATED_IMMUNITY	GOBP_B_CELL_MEDIATED_IMMUNITY	105	0.555821	1.54521	0.0379242	0.256868	1	2032	tags=33%, list=13%, signal=38%
GOMF_CARBOHYDRATE_BINDING	GOMF_CARBOHYDRATE_BINDING	209	0.516093	1.54509	0.00772201	0.256479	1	2263	tags=32%, list=15%, signal=37%
GOBP_SARCOPLASMIC_RETICULUM_CALCIUM_ION_TRANSPORT	GOBP_SARCOPLASMIC_RETICULUM_CALCIUM_ION_TRANSPORT	34	0.643471	1.54496	0.015873	0.256177	1	2010	tags=41%, list=13%, signal=47%
GOBP_POSITIVE_REGULATION_OF_PROTEOLYSIS	GOBP_POSITIVE_REGULATION_OF_PROTEOLYSIS	328	0.373295	1.54482	0.0122449	0.255817	1	3443	tags=27%, list=22%, signal=35%
GOBP_REGULATION_OF_DEFENSE_RESPONSE_TO_VIRUS	GOBP_REGULATION_OF_DEFENSE_RESPONSE_TO_VIRUS	57	0.534301	1.54466	0.0603113	0.255465	1	2695	tags=30%, list=18%, signal=36%
GOBP_POSITIVE_REGULATION_OF_PROTEIN_LOCALIZATION_TO_CELL_SURFACE	GOBP_POSITIVE_REGULATION_OF_PROTEIN_LOCALIZATION_TO_CELL_SURFACE	16	0.586949	1.54414	0.0457256	0.255902	1	2911	tags=44%, list=19%, signal=54%
GOBP_REGULATION_OF_PROTEIN_POLYUBIQUITINATION	GOBP_REGULATION_OF_PROTEIN_POLYUBIQUITINATION	22	0.467031	1.54386	0.0578035	0.255886	1	4210	tags=27%, list=27%, signal=38%
GOBP_RESPONSE_TO_ISCHEMIA	GOBP_RESPONSE_TO_ISCHEMIA	46	0.495878	1.54349	0.0194553	0.255946	1	3079	tags=35%, list=20%, signal=43%
GOBP_TYPE_I_INTERFERON_PRODUCTION	GOBP_TYPE_I_INTERFERON_PRODUCTION	119	0.415561	1.54339	0.105159	0.255505	1	4002	tags=34%, list=26%, signal=46%
GOBP_POSITIVE_REGULATION_OF_INTERFERON_GAMMA_PRODUCTION	GOBP_POSITIVE_REGULATION_OF_INTERFERON_GAMMA_PRODUCTION	60	0.67942	1.54295	0.0418327	0.25568	1	2280	tags=52%, list=15%, signal=60%
GOCC_SPECIFIC_GRANULE	GOCC_SPECIFIC_GRANULE	148	0.494391	1.5428	0.0464217	0.255326	1	3530	tags=38%, list=23%, signal=49%
GOBP_POSITIVE_REGULATION_OF_NIK_NF_KAPPAB_SIGNALING	GOBP_POSITIVE_REGULATION_OF_NIK_NF_KAPPAB_SIGNALING	63	0.543983	1.54279	0.0416667	0.254762	1	2934	tags=40%, list=19%, signal=49%
GOBP_INTERFERON_BETA_PRODUCTION	GOBP_INTERFERON_BETA_PRODUCTION	48	0.469936	1.5421	0.0717132	0.255474	1	2710	tags=27%, list=18%, signal=33%
GOBP_NEGATIVE_REGULATION_OF_VASCULATURE_DEVELOPMENT	GOBP_NEGATIVE_REGULATION_OF_VASCULATURE_DEVELOPMENT	87	0.527208	1.5418	0.0228571	0.255503	1	2148	tags=32%, list=14%, signal=37%
GOBP_NEGATIVE_REGULATION_OF_EPITHELIAL_CELL_PROLIFERATION	GOBP_NEGATIVE_REGULATION_OF_EPITHELIAL_CELL_PROLIFERATION	116	0.498354	1.54176	0.0175781	0.254973	1	3384	tags=39%, list=22%, signal=49%
GOMF_TRANSMEMBRANE_RECEPTOR_PROTEIN_KINASE_ACTIVITY	GOMF_TRANSMEMBRANE_RECEPTOR_PROTEIN_KINASE_ACTIVITY	78	0.532309	1.54142	0.0177165	0.255032	1	2942	tags=37%, list=19%, signal=46%
GOBP_POSITIVE_REGULATION_OF_T_CELL_MEDIATED_CYTOTOXICITY	GOBP_POSITIVE_REGULATION_OF_T_CELL_MEDIATED_CYTOTOXICITY	24	0.712085	1.54092	0.0268595	0.255374	1	1509	tags=42%, list=10%, signal=46%
GOCC_EXTRINSIC_COMPONENT_OF_MEMBRANE	GOCC_EXTRINSIC_COMPONENT_OF_MEMBRANE	278	0.402885	1.5395	0.00583658	0.25732	1	2613	tags=27%, list=17%, signal=31%
GOBP_REGULATION_OF_B_CELL_RECEPTOR_SIGNALING_PATHWAY	GOBP_REGULATION_OF_B_CELL_RECEPTOR_SIGNALING_PATHWAY	22	0.708864	1.53949	0.0398406	0.256738	1	2365	tags=50%, list=15%, signal=59%
GOBP_ACTIN_POLYMERIZATION_OR_DEPOLYMERIZATION	GOBP_ACTIN_POLYMERIZATION_OR_DEPOLYMERIZATION	185	0.421652	1.53946	0.0259259	0.256222	1	2854	tags=29%, list=19%, signal=35%
GOBP_POSITIVE_REGULATION_OF_ENDOCYTOSIS	GOBP_POSITIVE_REGULATION_OF_ENDOCYTOSIS	95	0.474405	1.53907	0.0325048	0.256359	1	4013	tags=41%, list=26%, signal=55%
GOBP_RECEPTOR_MEDIATED_ENDOCYTOSIS	GOBP_RECEPTOR_MEDIATED_ENDOCYTOSIS	248	0.435424	1.53873	0.0173745	0.256302	1	4026	tags=35%, list=26%, signal=47%
GOBP_REGULATION_OF_LIPID_KINASE_ACTIVITY	GOBP_REGULATION_OF_LIPID_KINASE_ACTIVITY	62	0.526449	1.53846	0.0441459	0.256174	1	2934	tags=37%, list=19%, signal=46%
GOBP_RUFFLE_ORGANIZATION	GOBP_RUFFLE_ORGANIZATION	50	0.475849	1.53824	0.0375494	0.256054	1	2030	tags=26%, list=13%, signal=30%
GOBP_REGULATION_OF_AUTOPHAGY	GOBP_REGULATION_OF_AUTOPHAGY	305	0.290876	1.53788	0.0154739	0.25618	1	5027	tags=33%, list=33%, signal=48%
GOBP_NEGATIVE_REGULATION_OF_TRANSFORMING_GROWTH_FACTOR_BETA_RECEPTOR_SIGNALING_PATHWAY	GOBP_NEGATIVE_REGULATION_OF_TRANSFORMING_GROWTH_FACTOR_BETA_RECEPTOR_SIGNALING_PATHWAY	76	0.466164	1.53768	0.0289017	0.255978	1	2658	tags=24%, list=17%, signal=28%
GOBP_NEGATIVE_REGULATION_OF_ACTIN_FILAMENT_BUNDLE_ASSEMBLY	GOBP_NEGATIVE_REGULATION_OF_ACTIN_FILAMENT_BUNDLE_ASSEMBLY	29	0.58594	1.53753	0.0368852	0.2557	1	3528	tags=52%, list=23%, signal=67%
GOBP_REGULATION_OF_MEMBRANE_INVAGINATION	GOBP_REGULATION_OF_MEMBRANE_INVAGINATION	16	0.72675	1.53674	0.00395257	0.25665	1	3346	tags=69%, list=22%, signal=88%
GOMF_ACID_THIOL_LIGASE_ACTIVITY	GOMF_ACID_THIOL_LIGASE_ACTIVITY	29	0.547377	1.53667	0.0268595	0.256204	1	2855	tags=41%, list=19%, signal=51%
GOBP_PROTEIN_AUTOPHOSPHORYLATION	GOBP_PROTEIN_AUTOPHOSPHORYLATION	218	0.371808	1.53663	0.0102041	0.255703	1	3527	tags=30%, list=23%, signal=38%
GOBP_RESPONSE_TO_INTERLEUKIN_6	GOBP_RESPONSE_TO_INTERLEUKIN_6	39	0.534508	1.5366	0.0135922	0.25521	1	1651	tags=33%, list=11%, signal=37%
GOBP_REACTIVE_OXYGEN_SPECIES_METABOLIC_PROCESS	GOBP_REACTIVE_OXYGEN_SPECIES_METABOLIC_PROCESS	240	0.435703	1.53653	0.0115385	0.254713	1	2710	tags=30%, list=18%, signal=35%
GOBP_CYTOSOLIC_CALCIUM_ION_TRANSPORT	GOBP_CYTOSOLIC_CALCIUM_ION_TRANSPORT	153	0.51628	1.5362	0.00587084	0.254842	1	2683	tags=36%, list=17%, signal=43%
GOBP_NEGATIVE_REGULATION_OF_PRODUCTION_OF_MOLECULAR_MEDIATOR_OF_IMMUNE_RESPONSE	GOBP_NEGATIVE_REGULATION_OF_PRODUCTION_OF_MOLECULAR_MEDIATOR_OF_IMMUNE_RESPONSE	39	0.655558	1.536	0.0160321	0.254691	1	3152	tags=59%, list=21%, signal=74%
GOBP_RESPONSE_TO_INTERLEUKIN_4	GOBP_RESPONSE_TO_INTERLEUKIN_4	32	0.550563	1.53541	0.0545809	0.255266	1	2125	tags=28%, list=14%, signal=33%
GOBP_POSITIVE_REGULATION_OF_INTERLEUKIN_10_PRODUCTION	GOBP_POSITIVE_REGULATION_OF_INTERLEUKIN_10_PRODUCTION	35	0.663127	1.53531	0.0301811	0.25493	1	2248	tags=49%, list=15%, signal=57%
GOBP_POSITIVE_REGULATION_OF_RESPONSE_TO_EXTERNAL_STIMULUS	GOBP_POSITIVE_REGULATION_OF_RESPONSE_TO_EXTERNAL_STIMULUS	453	0.48255	1.53531	0.0233463	0.254377	1	3237	tags=36%, list=21%, signal=44%
GOBP_STRIATED_MUSCLE_CELL_PROLIFERATION	GOBP_STRIATED_MUSCLE_CELL_PROLIFERATION	56	0.541349	1.53512	0.0161943	0.254173	1	2849	tags=34%, list=19%, signal=42%
GOBP_NEGATIVE_REGULATION_OF_INTERLEUKIN_1_BETA_PRODUCTION	GOBP_NEGATIVE_REGULATION_OF_INTERLEUKIN_1_BETA_PRODUCTION	24	0.684924	1.53435	0.0257426	0.255134	1	3653	tags=63%, list=24%, signal=82%
GOBP_PEPTIDYL_TYROSINE_MODIFICATION	GOBP_PEPTIDYL_TYROSINE_MODIFICATION	340	0.457963	1.53432	0.010101	0.254651	1	3211	tags=34%, list=21%, signal=43%
GOMF_CORECEPTOR_ACTIVITY	GOMF_CORECEPTOR_ACTIVITY	42	0.619888	1.53402	0.0298211	0.254646	1	1670	tags=40%, list=11%, signal=45%
GOBP_REGULATION_OF_TOLL_LIKE_RECEPTOR_SIGNALING_PATHWAY	GOBP_REGULATION_OF_TOLL_LIKE_RECEPTOR_SIGNALING_PATHWAY	64	0.540176	1.5337	0.0508806	0.254757	1	2934	tags=36%, list=19%, signal=44%
GOBP_NEGATIVE_REGULATION_OF_T_HELPER_CELL_DIFFERENTIATION	GOBP_NEGATIVE_REGULATION_OF_T_HELPER_CELL_DIFFERENTIATION	18	0.624992	1.53312	0.0484496	0.25523	1	2491	tags=39%, list=16%, signal=46%
GOBP_NEGATIVE_REGULATION_OF_INFLAMMATORY_RESPONSE	GOBP_NEGATIVE_REGULATION_OF_INFLAMMATORY_RESPONSE	110	0.548597	1.53306	0.0212766	0.254754	1	3323	tags=46%, list=22%, signal=59%
GOCC_TERTIARY_GRANULE_MEMBRANE	GOCC_TERTIARY_GRANULE_MEMBRANE	68	0.564136	1.53256	0.0767717	0.255267	1	3896	tags=49%, list=25%, signal=65%
GOBP_MYELOID_DENDRITIC_CELL_DIFFERENTIATION	GOBP_MYELOID_DENDRITIC_CELL_DIFFERENTIATION	17	0.664677	1.53179	0.0350877	0.256095	1	2338	tags=41%, list=15%, signal=49%
GOMF_FATTY_ACID_LIGASE_ACTIVITY	GOMF_FATTY_ACID_LIGASE_ACTIVITY	20	0.606787	1.53159	0.0273109	0.255907	1	2357	tags=45%, list=15%, signal=53%
GOBP_DIVALENT_INORGANIC_CATION_HOMEOSTASIS	GOBP_DIVALENT_INORGANIC_CATION_HOMEOSTASIS	451	0.48065	1.53112	0.00389105	0.256223	1	2683	tags=31%, list=17%, signal=37%
GOBP_POSITIVE_REGULATION_OF_LEUKOCYTE_MIGRATION	GOBP_POSITIVE_REGULATION_OF_LEUKOCYTE_MIGRATION	122	0.537301	1.53097	0.0310078	0.255975	1	3346	tags=47%, list=22%, signal=59%
GOBP_POSITIVE_REGULATION_OF_LYMPHOCYTE_DIFFERENTIATION	GOBP_POSITIVE_REGULATION_OF_LYMPHOCYTE_DIFFERENTIATION	94	0.556883	1.53045	0.0525292	0.256406	1	3245	tags=46%, list=21%, signal=58%
GOBP_REGULATION_OF_RAC_PROTEIN_SIGNAL_TRANSDUCTION	GOBP_REGULATION_OF_RAC_PROTEIN_SIGNAL_TRANSDUCTION	18	0.531168	1.5303	0.0443548	0.256139	1	3472	tags=44%, list=23%, signal=57%
GOBP_REGULATION_OF_MYOBLAST_FUSION	GOBP_REGULATION_OF_MYOBLAST_FUSION	16	0.629025	1.52992	0.0398406	0.256356	1	4197	tags=63%, list=27%, signal=86%
GOBP_PODOSOME_ASSEMBLY	GOBP_PODOSOME_ASSEMBLY	16	0.640313	1.52989	0.0426357	0.255879	1	3135	tags=56%, list=20%, signal=71%
GOBP_POSITIVE_REGULATION_OF_PHOSPHATIDYLINOSITOL_3_KINASE_SIGNALING	GOBP_POSITIVE_REGULATION_OF_PHOSPHATIDYLINOSITOL_3_KINASE_SIGNALING	85	0.554731	1.52947	0.0246679	0.255958	1	3403	tags=46%, list=22%, signal=59%
GOBP_REGULATION_OF_ENDOTHELIAL_CELL_MIGRATION	GOBP_REGULATION_OF_ENDOTHELIAL_CELL_MIGRATION	155	0.482445	1.52939	0.027451	0.25555	1	3536	tags=39%, list=23%, signal=51%
GOBP_NEGATIVE_REGULATION_OF_REACTIVE_OXYGEN_SPECIES_BIOSYNTHETIC_PROCESS	GOBP_NEGATIVE_REGULATION_OF_REACTIVE_OXYGEN_SPECIES_BIOSYNTHETIC_PROCESS	27	0.536253	1.52935	0.0366795	0.25506	1	2710	tags=33%, list=18%, signal=40%
GOBP_LIPOPOLYSACCHARIDE_MEDIATED_SIGNALING_PATHWAY	GOBP_LIPOPOLYSACCHARIDE_MEDIATED_SIGNALING_PATHWAY	53	0.577161	1.52854	0.0456349	0.255979	1	2964	tags=43%, list=19%, signal=54%
GOBP_JNK_CASCADE	GOBP_JNK_CASCADE	181	0.41188	1.52847	0.0121951	0.255608	1	3136	tags=28%, list=20%, signal=34%
GOBP_ADENYLATE_CYCLASE_ACTIVATING_ADRENERGIC_RECEPTOR_SIGNALING_PATHWAY	GOBP_ADENYLATE_CYCLASE_ACTIVATING_ADRENERGIC_RECEPTOR_SIGNALING_PATHWAY	23	0.651918	1.52791	0.0282486	0.256135	1	2114	tags=43%, list=14%, signal=50%
GOBP_CALCIUM_ION_TRANSPORT_INTO_CYTOSOL	GOBP_CALCIUM_ION_TRANSPORT_INTO_CYTOSOL	139	0.527672	1.52703	0.00773694	0.257235	1	2647	tags=38%, list=17%, signal=46%
GOBP_REGULATION_OF_ANTIGEN_RECEPTOR_MEDIATED_SIGNALING_PATHWAY	GOBP_REGULATION_OF_ANTIGEN_RECEPTOR_MEDIATED_SIGNALING_PATHWAY	57	0.645499	1.52695	0.0711462	0.256851	1	2560	tags=42%, list=17%, signal=50%
GOBP_POSITIVE_REGULATION_OF_BIOMINERALIZATION	GOBP_POSITIVE_REGULATION_OF_BIOMINERALIZATION	43	0.570249	1.52603	0.0118577	0.258049	1	1523	tags=33%, list=10%, signal=36%
GOBP_REGULATION_OF_LEUKOCYTE_MIGRATION	GOBP_REGULATION_OF_LEUKOCYTE_MIGRATION	179	0.539363	1.52601	0.0277228	0.257534	1	3152	tags=46%, list=21%, signal=57%
GOBP_LYMPHOCYTE_HOMEOSTASIS	GOBP_LYMPHOCYTE_HOMEOSTASIS	55	0.558691	1.52574	0.0502008	0.257531	1	2453	tags=35%, list=16%, signal=41%
GOBP_NEGATIVE_REGULATION_OF_FIBROBLAST_PROLIFERATION	GOBP_NEGATIVE_REGULATION_OF_FIBROBLAST_PROLIFERATION	28	0.495101	1.52528	0.040856	0.257863	1	2017	tags=18%, list=13%, signal=21%
GOBP_REGULATION_OF_CELL_PROJECTION_ASSEMBLY	GOBP_REGULATION_OF_CELL_PROJECTION_ASSEMBLY	164	0.397215	1.52477	0.0159046	0.258267	1	3472	tags=32%, list=23%, signal=41%
GOMF_ICOSANOID_RECEPTOR_ACTIVITY	GOMF_ICOSANOID_RECEPTOR_ACTIVITY	15	0.742822	1.52464	0.0158103	0.25797	1	2596	tags=60%, list=17%, signal=72%
GOBP_PHOSPHATIDYLINOSITOL_METABOLIC_PROCESS	GOBP_PHOSPHATIDYLINOSITOL_METABOLIC_PROCESS	168	0.37082	1.52442	0.0162602	0.257856	1	4230	tags=38%, list=28%, signal=52%
GOMF_PHOSPHOLIPASE_ACTIVITY	GOMF_PHOSPHOLIPASE_ACTIVITY	92	0.506556	1.52389	0.0176471	0.258302	1	3179	tags=41%, list=21%, signal=52%
GOBP_NEGATIVE_REGULATION_OF_CALCIUM_MEDIATED_SIGNALING	GOBP_NEGATIVE_REGULATION_OF_CALCIUM_MEDIATED_SIGNALING	18	0.630085	1.52365	0.0342742	0.258149	1	2907	tags=50%, list=19%, signal=62%
GOBP_POSITIVE_REGULATION_OF_CYTOSKELETON_ORGANIZATION	GOBP_POSITIVE_REGULATION_OF_CYTOSKELETON_ORGANIZATION	198	0.408511	1.52347	0.0203327	0.257914	1	2961	tags=26%, list=19%, signal=32%
GOMF_DOPAMINE_RECEPTOR_BINDING	GOMF_DOPAMINE_RECEPTOR_BINDING	16	0.567039	1.5233	0.055336	0.257657	1	4731	tags=50%, list=31%, signal=72%
GOBP_POSITIVE_REGULATION_OF_NITRIC_OXIDE_METABOLIC_PROCESS	GOBP_POSITIVE_REGULATION_OF_NITRIC_OXIDE_METABOLIC_PROCESS	36	0.598666	1.52315	0.0363289	0.257423	1	3604	tags=53%, list=23%, signal=69%
GOBP_MUSCLE_ADAPTATION	GOBP_MUSCLE_ADAPTATION	96	0.465189	1.52306	0.0316206	0.257064	1	3174	tags=32%, list=21%, signal=40%
GOBP_LYSOSOMAL_TRANSPORT	GOBP_LYSOSOMAL_TRANSPORT	100	0.323997	1.52278	0.0478088	0.257078	1	6079	tags=46%, list=40%, signal=76%
GOBP_REGULATION_OF_CELL_SHAPE	GOBP_REGULATION_OF_CELL_SHAPE	139	0.431393	1.5224	0.0326296	0.257221	1	4009	tags=44%, list=26%, signal=59%
GOMF_TRANSCRIPTION_COREGULATOR_BINDING	GOMF_TRANSCRIPTION_COREGULATOR_BINDING	60	0.381419	1.52192	0.0423387	0.257572	1	2203	tags=17%, list=14%, signal=19%
GOBP_REGULATION_OF_MONONUCLEAR_CELL_MIGRATION	GOBP_REGULATION_OF_MONONUCLEAR_CELL_MIGRATION	96	0.541686	1.52176	0.0397614	0.257309	1	3346	tags=49%, list=22%, signal=62%
GOBP_SECOND_MESSENGER_MEDIATED_SIGNALING	GOBP_SECOND_MESSENGER_MEDIATED_SIGNALING	277	0.49368	1.52161	0.00782779	0.257035	1	2045	tags=28%, list=13%, signal=31%
GOBP_HETEROPHILIC_CELL_CELL_ADHESION_VIA_PLASMA_MEMBRANE_CELL_ADHESION_MOLECULES	GOBP_HETEROPHILIC_CELL_CELL_ADHESION_VIA_PLASMA_MEMBRANE_CELL_ADHESION_MOLECULES	35	0.636276	1.52059	0.0119048	0.258385	1	1975	tags=37%, list=13%, signal=43%
GOBP_NEGATIVE_REGULATION_OF_CELL_JUNCTION_ASSEMBLY	GOBP_NEGATIVE_REGULATION_OF_CELL_JUNCTION_ASSEMBLY	29	0.570058	1.52034	0.0294118	0.258337	1	2609	tags=34%, list=17%, signal=41%
GOBP_INTERLEUKIN_4_PRODUCTION	GOBP_INTERLEUKIN_4_PRODUCTION	29	0.680664	1.5203	0.0337302	0.257897	1	2248	tags=55%, list=15%, signal=65%
GOBP_PROGRAMMED_NECROTIC_CELL_DEATH	GOBP_PROGRAMMED_NECROTIC_CELL_DEATH	42	0.485649	1.52012	0.0712871	0.257672	1	3231	tags=38%, list=21%, signal=48%
GOCC_PROTEIN_COMPLEX_INVOLVED_IN_CELL_ADHESION	GOCC_PROTEIN_COMPLEX_INVOLVED_IN_CELL_ADHESION	35	0.656922	1.52011	0.0346821	0.257178	1	2304	tags=51%, list=15%, signal=60%
GOBP_POSITIVE_REGULATION_OF_MACROPHAGE_CHEMOTAXIS	GOBP_POSITIVE_REGULATION_OF_MACROPHAGE_CHEMOTAXIS	16	0.616048	1.51952	0.0321932	0.257782	1	3145	tags=50%, list=20%, signal=63%
GOBP_POSITIVE_REGULATION_OF_PRODUCTION_OF_MOLECULAR_MEDIATOR_OF_IMMUNE_RESPONSE	GOBP_POSITIVE_REGULATION_OF_PRODUCTION_OF_MOLECULAR_MEDIATOR_OF_IMMUNE_RESPONSE	86	0.553816	1.51941	0.0466019	0.257488	1	2978	tags=40%, list=19%, signal=49%
GOBP_MODULATION_BY_HOST_OF_SYMBIONT_PROCESS	GOBP_MODULATION_BY_HOST_OF_SYMBIONT_PROCESS	56	0.418797	1.51932	0.0273438	0.257148	1	4337	tags=34%, list=28%, signal=47%
GOMF_PROTEIN_KINASE_A_BINDING	GOMF_PROTEIN_KINASE_A_BINDING	48	0.529057	1.51852	0.0221328	0.258137	1	2114	tags=25%, list=14%, signal=29%
GOBP_REGULATION_OF_PROGRAMMED_NECROTIC_CELL_DEATH	GOBP_REGULATION_OF_PROGRAMMED_NECROTIC_CELL_DEATH	20	0.495736	1.51812	0.0584795	0.258297	1	5216	tags=60%, list=34%, signal=91%
GOBP_REGULATION_OF_FILOPODIUM_ASSEMBLY	GOBP_REGULATION_OF_FILOPODIUM_ASSEMBLY	38	0.480268	1.51802	0.0433925	0.257943	1	1653	tags=18%, list=11%, signal=21%
GOBP_MYELOID_LEUKOCYTE_DIFFERENTIATION	GOBP_MYELOID_LEUKOCYTE_DIFFERENTIATION	185	0.482664	1.518	0.0294695	0.257483	1	3211	tags=37%, list=21%, signal=46%
GOBP_B_CELL_ACTIVATION	GOBP_B_CELL_ACTIVATION	235	0.498885	1.51783	0.07	0.257294	1	3015	tags=35%, list=20%, signal=43%
GOBP_REGULATION_OF_PHOSPHATIDYLINOSITOL_3_KINASE_SIGNALING	GOBP_REGULATION_OF_PHOSPHATIDYLINOSITOL_3_KINASE_SIGNALING	116	0.509104	1.51745	0.0229008	0.257479	1	3403	tags=41%, list=22%, signal=52%
GOBP_INTERLEUKIN_5_PRODUCTION	GOBP_INTERLEUKIN_5_PRODUCTION	18	0.667427	1.5173	0.0287356	0.257242	1	2032	tags=39%, list=13%, signal=45%
GOBP_REGULATION_OF_SUPRAMOLECULAR_FIBER_ORGANIZATION	GOBP_REGULATION_OF_SUPRAMOLECULAR_FIBER_ORGANIZATION	326	0.396259	1.5171	0.0244361	0.257139	1	3532	tags=32%, list=23%, signal=41%
GOCC_SARCOLEMMA	GOCC_SARCOLEMMA	132	0.505712	1.51697	0.0190114	0.256879	1	2641	tags=34%, list=17%, signal=41%
GOBP_REGULATION_OF_ADENYLATE_CYCLASE_ACTIVITY	GOBP_REGULATION_OF_ADENYLATE_CYCLASE_ACTIVITY	28	0.565547	1.51651	0.0316832	0.257128	1	3078	tags=32%, list=20%, signal=40%
GOBP_GRANULOCYTE_DIFFERENTIATION	GOBP_GRANULOCYTE_DIFFERENTIATION	32	0.554025	1.51634	0.0505051	0.256935	1	2552	tags=38%, list=17%, signal=45%
GOBP_POSITIVE_REGULATION_OF_BONE_MINERALIZATION	GOBP_POSITIVE_REGULATION_OF_BONE_MINERALIZATION	36	0.592882	1.51625	0.0118577	0.256633	1	1523	tags=36%, list=10%, signal=40%
GOBP_REGULATION_OF_LONG_TERM_SYNAPTIC_POTENTIATION	GOBP_REGULATION_OF_LONG_TERM_SYNAPTIC_POTENTIATION	41	0.57208	1.5156	0.0242086	0.257333	1	3876	tags=51%, list=25%, signal=68%
GOBP_RESPONSE_TO_MOLECULE_OF_BACTERIAL_ORIGIN	GOBP_RESPONSE_TO_MOLECULE_OF_BACTERIAL_ORIGIN	306	0.507367	1.51533	0.0319361	0.257336	1	3117	tags=40%, list=20%, signal=49%
GOBP_CELLULAR_DEFENSE_RESPONSE	GOBP_CELLULAR_DEFENSE_RESPONSE	48	0.650715	1.51467	0.0403846	0.257975	1	2884	tags=56%, list=19%, signal=69%
GOBP_MONONUCLEAR_CELL_MIGRATION	GOBP_MONONUCLEAR_CELL_MIGRATION	158	0.556565	1.51424	0.0474308	0.258265	1	3152	tags=49%, list=21%, signal=61%
GOBP_SLEEP	GOBP_SLEEP	30	0.568805	1.51406	0.0174419	0.258079	1	2833	tags=40%, list=18%, signal=49%
GOBP_NEGATIVE_REGULATION_OF_TOLL_LIKE_RECEPTOR_SIGNALING_PATHWAY	GOBP_NEGATIVE_REGULATION_OF_TOLL_LIKE_RECEPTOR_SIGNALING_PATHWAY	33	0.54775	1.51365	0.0617761	0.258288	1	2934	tags=33%, list=19%, signal=41%
GOBP_REGULATION_OF_CARDIAC_MUSCLE_CELL_PROLIFERATION	GOBP_REGULATION_OF_CARDIAC_MUSCLE_CELL_PROLIFERATION	36	0.567602	1.51358	0.0400763	0.257934	1	2352	tags=36%, list=15%, signal=43%
GOMF_PEPTIDE_BINDING	GOMF_PEPTIDE_BINDING	274	0.426467	1.5131	0.01341	0.258259	1	3086	tags=28%, list=20%, signal=34%
GOBP_POSITIVE_REGULATION_OF_PLASMA_MEMBRANE_BOUNDED_CELL_PROJECTION_ASSEMBLY	GOBP_POSITIVE_REGULATION_OF_PLASMA_MEMBRANE_BOUNDED_CELL_PROJECTION_ASSEMBLY	94	0.430628	1.51291	0.0372549	0.258124	1	3472	tags=32%, list=23%, signal=41%
GOBP_PLATELET_MORPHOGENESIS	GOBP_PLATELET_MORPHOGENESIS	20	0.483477	1.51284	0.0524194	0.257782	1	3203	tags=30%, list=21%, signal=38%
GOBP_POSITIVE_REGULATION_OF_CD4_POSITIVE_ALPHA_BETA_T_CELL_DIFFERENTIATION	GOBP_POSITIVE_REGULATION_OF_CD4_POSITIVE_ALPHA_BETA_T_CELL_DIFFERENTIATION	29	0.666784	1.51241	0.0402414	0.258057	1	3245	tags=66%, list=21%, signal=83%
GOBP_SYNCYTIUM_FORMATION	GOBP_SYNCYTIUM_FORMATION	48	0.491134	1.51238	0.0271318	0.25762	1	3324	tags=40%, list=22%, signal=50%
GOBP_GLIAL_CELL_PROLIFERATION	GOBP_GLIAL_CELL_PROLIFERATION	43	0.533785	1.51199	0.0267686	0.257911	1	3166	tags=44%, list=21%, signal=56%
GOMF_AMIDE_BINDING	GOMF_AMIDE_BINDING	340	0.406367	1.51188	0.0133333	0.2576	1	2280	tags=21%, list=15%, signal=24%
GOBP_REGULATION_OF_LYMPHOCYTE_DIFFERENTIATION	GOBP_REGULATION_OF_LYMPHOCYTE_DIFFERENTIATION	164	0.522091	1.51118	0.0534653	0.258337	1	3017	tags=40%, list=20%, signal=49%
GOBP_NEGATIVE_REGULATION_OF_RHO_PROTEIN_SIGNAL_TRANSDUCTION	GOBP_NEGATIVE_REGULATION_OF_RHO_PROTEIN_SIGNAL_TRANSDUCTION	20	0.571167	1.51088	0.0616016	0.258348	1	3296	tags=40%, list=21%, signal=51%
GOBP_LIPOXYGENASE_PATHWAY	GOBP_LIPOXYGENASE_PATHWAY	15	0.712462	1.51069	0.033195	0.2582	1	1671	tags=53%, list=11%, signal=60%
GOBP_CELLULAR_RESPONSE_TO_ACID_CHEMICAL	GOBP_CELLULAR_RESPONSE_TO_ACID_CHEMICAL	59	0.438693	1.51046	0.0597302	0.258165	1	3604	tags=34%, list=23%, signal=44%
GOBP_POSITIVE_REGULATION_OF_TYROSINE_PHOSPHORYLATION_OF_STAT_PROTEIN	GOBP_POSITIVE_REGULATION_OF_TYROSINE_PHOSPHORYLATION_OF_STAT_PROTEIN	61	0.550507	1.51033	0.0132075	0.257924	1	1912	tags=31%, list=12%, signal=35%
GOBP_POSITIVE_REGULATION_OF_MONONUCLEAR_CELL_MIGRATION	GOBP_POSITIVE_REGULATION_OF_MONONUCLEAR_CELL_MIGRATION	57	0.576979	1.50999	0.0357853	0.258086	1	3346	tags=53%, list=22%, signal=67%
GOBP_REGULATION_OF_OSTEOCLAST_DIFFERENTIATION	GOBP_REGULATION_OF_OSTEOCLAST_DIFFERENTIATION	57	0.563798	1.50973	0.0358566	0.258118	1	3653	tags=47%, list=24%, signal=62%
GOCC_ER_TO_GOLGI_TRANSPORT_VESICLE_MEMBRANE	GOCC_ER_TO_GOLGI_TRANSPORT_VESICLE_MEMBRANE	52	0.437009	1.50967	0.0538922	0.257728	1	3331	tags=23%, list=22%, signal=29%
GOBP_POSITIVE_REGULATION_OF_CYTOKINE_PRODUCTION_INVOLVED_IN_IMMUNE_RESPONSE	GOBP_POSITIVE_REGULATION_OF_CYTOKINE_PRODUCTION_INVOLVED_IN_IMMUNE_RESPONSE	48	0.573529	1.5092	0.0541586	0.2581	1	3152	tags=46%, list=21%, signal=57%
GOBP_ENDOPLASMIC_RETICULUM_ORGANIZATION	GOBP_ENDOPLASMIC_RETICULUM_ORGANIZATION	66	0.36784	1.50805	0.0311891	0.259697	1	1968	tags=11%, list=13%, signal=12%
GOBP_T_CELL_APOPTOTIC_PROCESS	GOBP_T_CELL_APOPTOTIC_PROCESS	46	0.546508	1.50788	0.03125	0.259472	1	2125	tags=28%, list=14%, signal=33%
GOBP_POSITIVE_REGULATION_OF_RESPONSE_TO_CYTOKINE_STIMULUS	GOBP_POSITIVE_REGULATION_OF_RESPONSE_TO_CYTOKINE_STIMULUS	50	0.498209	1.50784	0.0812379	0.259082	1	3231	tags=34%, list=21%, signal=43%
GOBP_CALCIUM_ION_TRANSMEMBRANE_TRANSPORT	GOBP_CALCIUM_ION_TRANSMEMBRANE_TRANSPORT	266	0.463037	1.50715	0.00785855	0.259882	1	3025	tags=32%, list=20%, signal=39%
GOMF_PROTEIN_KINASE_C_ACTIVITY	GOMF_PROTEIN_KINASE_C_ACTIVITY	15	0.569098	1.50706	0.0490196	0.259576	1	2909	tags=40%, list=19%, signal=49%
GOBP_REGULATION_OF_SYSTEMIC_ARTERIAL_BLOOD_PRESSURE_MEDIATED_BY_A_CHEMICAL_SIGNAL	GOBP_REGULATION_OF_SYSTEMIC_ARTERIAL_BLOOD_PRESSURE_MEDIATED_BY_A_CHEMICAL_SIGNAL	43	0.626121	1.50695	0.0116279	0.259286	1	704	tags=28%, list=5%, signal=29%
GOBP_CELLULAR_RESPONSE_TO_LIPOPROTEIN_PARTICLE_STIMULUS	GOBP_CELLULAR_RESPONSE_TO_LIPOPROTEIN_PARTICLE_STIMULUS	28	0.596396	1.50646	0.0394477	0.259539	1	3575	tags=50%, list=23%, signal=65%
GOBP_INTERFERON_ALPHA_PRODUCTION	GOBP_INTERFERON_ALPHA_PRODUCTION	28	0.608803	1.50635	0.0712871	0.259284	1	2312	tags=36%, list=15%, signal=42%
GOBP_NEGATIVE_REGULATION_OF_CELLULAR_RESPONSE_TO_INSULIN_STIMULUS	GOBP_NEGATIVE_REGULATION_OF_CELLULAR_RESPONSE_TO_INSULIN_STIMULUS	34	0.469392	1.50578	0.0342857	0.259843	1	2905	tags=35%, list=19%, signal=43%
GOBP_NEGATIVE_REGULATION_OF_PHAGOCYTOSIS	GOBP_NEGATIVE_REGULATION_OF_PHAGOCYTOSIS	19	0.577731	1.50538	0.0643939	0.260084	1	5135	tags=68%, list=33%, signal=103%
GOBP_MEMBRANE_PROTEIN_PROTEOLYSIS	GOBP_MEMBRANE_PROTEIN_PROTEOLYSIS	59	0.440653	1.50449	0.0452756	0.261287	1	3542	tags=34%, list=23%, signal=44%
GOMF_C_C_CHEMOKINE_BINDING	GOMF_C_C_CHEMOKINE_BINDING	19	0.786493	1.50407	0.0254902	0.261604	1	1258	tags=58%, list=8%, signal=63%
GOBP_REGULATION_OF_TRIGLYCERIDE_METABOLIC_PROCESS	GOBP_REGULATION_OF_TRIGLYCERIDE_METABOLIC_PROCESS	34	0.514817	1.5038	0.0374753	0.261582	1	2773	tags=32%, list=18%, signal=39%
GOBP_RESPIRATORY_BURST	GOBP_RESPIRATORY_BURST	28	0.614689	1.5034	0.0518672	0.261805	1	2624	tags=50%, list=17%, signal=60%
GOBP_PROTEIN_DESTABILIZATION	GOBP_PROTEIN_DESTABILIZATION	39	0.399334	1.50298	0.0497018	0.262116	1	4790	tags=51%, list=31%, signal=74%
GOBP_INTERLEUKIN_12_PRODUCTION	GOBP_INTERLEUKIN_12_PRODUCTION	57	0.635307	1.50234	0.0475248	0.262712	1	3211	tags=54%, list=21%, signal=69%
GOBP_VASCULAR_WOUND_HEALING	GOBP_VASCULAR_WOUND_HEALING	17	0.619059	1.50233	0.0468165	0.262273	1	2453	tags=35%, list=16%, signal=42%
GOMF_PEPTIDASE_ACTIVATOR_ACTIVITY	GOMF_PEPTIDASE_ACTIVATOR_ACTIVITY	39	0.49764	1.50164	0.0828157	0.26304	1	2369	tags=31%, list=15%, signal=36%
GOBP_DENDRITIC_CELL_MIGRATION	GOBP_DENDRITIC_CELL_MIGRATION	27	0.703596	1.50153	0.0455446	0.262757	1	2995	tags=56%, list=20%, signal=69%
GOBP_POSITIVE_REGULATION_OF_B_CELL_PROLIFERATION	GOBP_POSITIVE_REGULATION_OF_B_CELL_PROLIFERATION	39	0.602658	1.50119	0.0533597	0.262888	1	1505	tags=31%, list=10%, signal=34%
GOBP_REGULATION_OF_IMMUNOGLOBULIN_PRODUCTION	GOBP_REGULATION_OF_IMMUNOGLOBULIN_PRODUCTION	58	0.576935	1.50092	0.054	0.26292	1	3382	tags=43%, list=22%, signal=55%
GOBP_PHOSPHATIDYLETHANOLAMINE_METABOLIC_PROCESS	GOBP_PHOSPHATIDYLETHANOLAMINE_METABOLIC_PROCESS	23	0.571797	1.50065	0.0357815	0.26297	1	4185	tags=52%, list=27%, signal=72%
GOBP_VIRAL_LIFE_CYCLE	GOBP_VIRAL_LIFE_CYCLE	309	0.357106	1.50058	0.0457256	0.262619	1	3007	tags=24%, list=20%, signal=29%
GOBP_POSITIVE_REGULATION_OF_UBIQUITIN_DEPENDENT_PROTEIN_CATABOLIC_PROCESS	GOBP_POSITIVE_REGULATION_OF_UBIQUITIN_DEPENDENT_PROTEIN_CATABOLIC_PROCESS	93	0.341568	1.50046	0.0220884	0.262377	1	1884	tags=15%, list=12%, signal=17%
GOBP_RESPONSE_TO_UV_B	GOBP_RESPONSE_TO_UV_B	16	0.646158	1.50044	0.0294118	0.261942	1	3514	tags=56%, list=23%, signal=73%
GOBP_OSTEOCLAST_DIFFERENTIATION	GOBP_OSTEOCLAST_DIFFERENTIATION	84	0.519047	1.50039	0.044	0.261539	1	3211	tags=39%, list=21%, signal=49%
GOCC_MHC_PROTEIN_COMPLEX	GOCC_MHC_PROTEIN_COMPLEX	18	0.728856	1.50029	0.0247423	0.261275	1	3066	tags=72%, list=20%, signal=90%
GOBP_ADRENERGIC_RECEPTOR_SIGNALING_PATHWAY	GOBP_ADRENERGIC_RECEPTOR_SIGNALING_PATHWAY	27	0.60783	1.50013	0.0325048	0.261093	1	2114	tags=37%, list=14%, signal=43%
GOBP_POSITIVE_REGULATION_OF_ALPHA_BETA_T_CELL_PROLIFERATION	GOBP_POSITIVE_REGULATION_OF_ALPHA_BETA_T_CELL_PROLIFERATION	19	0.732895	1.49935	0.0505051	0.261974	1	2280	tags=63%, list=15%, signal=74%
GOBP_PHOSPHATE_ION_TRANSPORT	GOBP_PHOSPHATE_ION_TRANSPORT	26	0.575552	1.4993	0.0420842	0.261591	1	2415	tags=27%, list=16%, signal=32%
GOMF_ORGANIC_CATION_TRANSMEMBRANE_TRANSPORTER_ACTIVITY	GOMF_ORGANIC_CATION_TRANSMEMBRANE_TRANSPORTER_ACTIVITY	22	0.593157	1.49922	0.0258964	0.261254	1	3366	tags=36%, list=22%, signal=47%
GOCC_RUFFLE	GOCC_RUFFLE	162	0.373762	1.4992	0.0506823	0.260845	1	4738	tags=46%, list=31%, signal=66%
GOBP_POSITIVE_REGULATION_OF_PROTEIN_LOCALIZATION_TO_MEMBRANE	GOBP_POSITIVE_REGULATION_OF_PROTEIN_LOCALIZATION_TO_MEMBRANE	111	0.369796	1.49913	0.0218254	0.260496	1	3311	tags=28%, list=22%, signal=35%
GOBP_CELLULAR_PIGMENTATION	GOBP_CELLULAR_PIGMENTATION	47	0.418281	1.49904	0.0567951	0.260178	1	4511	tags=36%, list=29%, signal=51%
GOBP_T_HELPER_1_TYPE_IMMUNE_RESPONSE	GOBP_T_HELPER_1_TYPE_IMMUNE_RESPONSE	40	0.615404	1.49894	0.0478088	0.259917	1	3152	tags=55%, list=21%, signal=69%
GOBP_EPITHELIAL_TUBE_BRANCHING_INVOLVED_IN_LUNG_MORPHOGENESIS	GOBP_EPITHELIAL_TUBE_BRANCHING_INVOLVED_IN_LUNG_MORPHOGENESIS	27	0.596181	1.49828	0.0396975	0.260639	1	1788	tags=37%, list=12%, signal=42%
GOBP_POSITIVE_REGULATION_OF_INTERFERON_BETA_PRODUCTION	GOBP_POSITIVE_REGULATION_OF_INTERFERON_BETA_PRODUCTION	32	0.480676	1.49749	0.0878906	0.261667	1	2695	tags=25%, list=18%, signal=30%
GOBP_NEGATIVE_REGULATION_OF_LEUKOCYTE_APOPTOTIC_PROCESS	GOBP_NEGATIVE_REGULATION_OF_LEUKOCYTE_APOPTOTIC_PROCESS	43	0.570393	1.49687	0.0501002	0.262278	1	3316	tags=51%, list=22%, signal=65%
GOBP_POSITIVE_REGULATION_OF_STRESS_ACTIVATED_PROTEIN_KINASE_SIGNALING_CASCADE	GOBP_POSITIVE_REGULATION_OF_STRESS_ACTIVATED_PROTEIN_KINASE_SIGNALING_CASCADE	109	0.469655	1.49683	0.026	0.261876	1	3526	tags=39%, list=23%, signal=51%
GOBP_REGULATION_OF_ER_TO_GOLGI_VESICLE_MEDIATED_TRANSPORT	GOBP_REGULATION_OF_ER_TO_GOLGI_VESICLE_MEDIATED_TRANSPORT	15	0.500056	1.49653	0.0741483	0.261977	1	2049	tags=13%, list=13%, signal=15%
GOBP_POSITIVE_REGULATION_OF_INTERLEUKIN_6_PRODUCTION	GOBP_POSITIVE_REGULATION_OF_INTERLEUKIN_6_PRODUCTION	77	0.550163	1.49589	0.0456349	0.262638	1	2934	tags=40%, list=19%, signal=50%
GOBP_ACUTE_INFLAMMATORY_RESPONSE_TO_ANTIGENIC_STIMULUS	GOBP_ACUTE_INFLAMMATORY_RESPONSE_TO_ANTIGENIC_STIMULUS	21	0.673238	1.49577	0.0396825	0.262375	1	3086	tags=62%, list=20%, signal=77%
GOBP_REGULATION_OF_T_CELL_APOPTOTIC_PROCESS	GOBP_REGULATION_OF_T_CELL_APOPTOTIC_PROCESS	31	0.562557	1.4953	0.0416667	0.262742	1	2125	tags=32%, list=14%, signal=37%
GOBP_P38MAPK_CASCADE	GOBP_P38MAPK_CASCADE	41	0.532072	1.49524	0.034749	0.262418	1	4061	tags=54%, list=26%, signal=73%
GOCC_PRESYNAPTIC_ACTIVE_ZONE_MEMBRANE	GOCC_PRESYNAPTIC_ACTIVE_ZONE_MEMBRANE	26	0.592336	1.49516	0.0365112	0.262091	1	1250	tags=27%, list=8%, signal=29%
GOBP_REGULATION_OF_B_CELL_PROLIFERATION	GOBP_REGULATION_OF_B_CELL_PROLIFERATION	60	0.610336	1.49511	0.0516899	0.261741	1	3288	tags=48%, list=21%, signal=61%
GOBP_POSITIVE_REGULATION_OF_PROTEIN_CONTAINING_COMPLEX_ASSEMBLY	GOBP_POSITIVE_REGULATION_OF_PROTEIN_CONTAINING_COMPLEX_ASSEMBLY	223	0.374855	1.49496	0.0215264	0.26161	1	2882	tags=24%, list=19%, signal=29%
GOMF_PEPTIDE_HORMONE_BINDING	GOMF_PEPTIDE_HORMONE_BINDING	48	0.563038	1.49491	0.021611	0.261251	1	2280	tags=31%, list=15%, signal=37%
GOBP_HEART_TRABECULA_MORPHOGENESIS	GOBP_HEART_TRABECULA_MORPHOGENESIS	29	0.575451	1.49424	0.0446602	0.261968	1	2163	tags=34%, list=14%, signal=40%
GOMF_TRANSCRIPTION_COACTIVATOR_BINDING	GOMF_TRANSCRIPTION_COACTIVATOR_BINDING	26	0.488754	1.49411	0.0571429	0.261811	1	2203	tags=23%, list=14%, signal=27%
GOBP_FOAM_CELL_DIFFERENTIATION	GOBP_FOAM_CELL_DIFFERENTIATION	36	0.616856	1.49399	0.0309478	0.261581	1	3536	tags=56%, list=23%, signal=72%
GOBP_POSITIVE_REGULATION_OF_EPITHELIAL_CELL_APOPTOTIC_PROCESS	GOBP_POSITIVE_REGULATION_OF_EPITHELIAL_CELL_APOPTOTIC_PROCESS	29	0.589173	1.4938	0.0521235	0.261456	1	2964	tags=38%, list=19%, signal=47%
GOBP_REGULATION_OF_MYELOID_CELL_DIFFERENTIATION	GOBP_REGULATION_OF_MYELOID_CELL_DIFFERENTIATION	198	0.417154	1.49308	0.0300188	0.262268	1	3211	tags=30%, list=21%, signal=38%
GOMF_TRANSMEMBRANE_RECEPTOR_PROTEIN_TYROSINE_KINASE_ACTIVITY	GOMF_TRANSMEMBRANE_RECEPTOR_PROTEIN_TYROSINE_KINASE_ACTIVITY	61	0.53705	1.49307	0.0200803	0.261857	1	2942	tags=38%, list=19%, signal=46%
GOMF_LIPASE_ACTIVITY	GOMF_LIPASE_ACTIVITY	115	0.481817	1.49178	0.0237154	0.263609	1	3260	tags=38%, list=21%, signal=48%
GOBP_POSITIVE_REGULATION_OF_MYELOID_LEUKOCYTE_MEDIATED_IMMUNITY	GOBP_POSITIVE_REGULATION_OF_MYELOID_LEUKOCYTE_MEDIATED_IMMUNITY	17	0.66027	1.49087	0.0577689	0.264774	1	2978	tags=47%, list=19%, signal=58%
GOBP_CD8_POSITIVE_ALPHA_BETA_T_CELL_ACTIVATION	GOBP_CD8_POSITIVE_ALPHA_BETA_T_CELL_ACTIVATION	23	0.705619	1.49081	0.0571992	0.264455	1	3653	tags=78%, list=24%, signal=103%
GOBP_CD4_POSITIVE_ALPHA_BETA_T_CELL_CYTOKINE_PRODUCTION	GOBP_CD4_POSITIVE_ALPHA_BETA_T_CELL_CYTOKINE_PRODUCTION	18	0.675387	1.49072	0.0501859	0.264164	1	3152	tags=50%, list=21%, signal=63%
GOBP_IMMUNOGLOBULIN_PRODUCTION_INVOLVED_IN_IMMUNOGLOBULIN_MEDIATED_IMMUNE_RESPONSE	GOBP_IMMUNOGLOBULIN_PRODUCTION_INVOLVED_IN_IMMUNOGLOBULIN_MEDIATED_IMMUNE_RESPONSE	45	0.556901	1.49026	0.0791075	0.264497	1	2206	tags=29%, list=14%, signal=34%
GOBP_GAMMA_DELTA_T_CELL_ACTIVATION	GOBP_GAMMA_DELTA_T_CELL_ACTIVATION	16	0.662954	1.49022	0.0532787	0.264138	1	3142	tags=69%, list=20%, signal=86%
GOCC_LUMENAL_SIDE_OF_ENDOPLASMIC_RETICULUM_MEMBRANE	GOCC_LUMENAL_SIDE_OF_ENDOPLASMIC_RETICULUM_MEMBRANE	21	0.617671	1.48983	0.0549898	0.264431	1	4251	tags=52%, list=28%, signal=72%
GOBP_CARDIAC_MUSCLE_CELL_PROLIFERATION	GOBP_CARDIAC_MUSCLE_CELL_PROLIFERATION	43	0.548542	1.48963	0.0491159	0.264372	1	2352	tags=33%, list=15%, signal=38%
GOBP_NEGATIVE_REGULATION_OF_TUMOR_NECROSIS_FACTOR_SUPERFAMILY_CYTOKINE_PRODUCTION	GOBP_NEGATIVE_REGULATION_OF_TUMOR_NECROSIS_FACTOR_SUPERFAMILY_CYTOKINE_PRODUCTION	50	0.602435	1.48952	0.0516899	0.264152	1	3080	tags=60%, list=20%, signal=75%
GOMF_GTPASE_ACTIVATOR_ACTIVITY	GOMF_GTPASE_ACTIVATOR_ACTIVITY	238	0.357002	1.48859	0.0233463	0.26542	1	4480	tags=42%, list=29%, signal=59%
GOBP_POSITIVE_REGULATION_OF_VASCULAR_ASSOCIATED_SMOOTH_MUSCLE_CELL_PROLIFERATION	GOBP_POSITIVE_REGULATION_OF_VASCULAR_ASSOCIATED_SMOOTH_MUSCLE_CELL_PROLIFERATION	31	0.573245	1.48851	0.0453686	0.265154	1	3078	tags=42%, list=20%, signal=52%
GOBP_NEGATIVE_REGULATION_OF_NF_KAPPAB_TRANSCRIPTION_FACTOR_ACTIVITY	GOBP_NEGATIVE_REGULATION_OF_NF_KAPPAB_TRANSCRIPTION_FACTOR_ACTIVITY	73	0.444762	1.48849	0.0627376	0.264753	1	3887	tags=38%, list=25%, signal=51%
GOBP_REGULATION_OF_REACTIVE_OXYGEN_SPECIES_METABOLIC_PROCESS	GOBP_REGULATION_OF_REACTIVE_OXYGEN_SPECIES_METABOLIC_PROCESS	167	0.436171	1.48846	0.0294118	0.264367	1	2710	tags=29%, list=18%, signal=35%
GOBP_STRESS_ACTIVATED_PROTEIN_KINASE_SIGNALING_CASCADE	GOBP_STRESS_ACTIVATED_PROTEIN_KINASE_SIGNALING_CASCADE	255	0.378583	1.48836	0.019802	0.264089	1	3136	tags=27%, list=20%, signal=33%
GOBP_POSITIVE_REGULATION_OF_CELLULAR_COMPONENT_BIOGENESIS	GOBP_POSITIVE_REGULATION_OF_CELLULAR_COMPONENT_BIOGENESIS	470	0.377482	1.48834	0.0212355	0.263712	1	3264	tags=27%, list=21%, signal=33%
GOBP_REGULATION_OF_EPITHELIAL_CELL_MIGRATION	GOBP_REGULATION_OF_EPITHELIAL_CELL_MIGRATION	215	0.444735	1.48796	0.0334646	0.263948	1	3401	tags=36%, list=22%, signal=46%
GOBP_ENTRY_INTO_HOST	GOBP_ENTRY_INTO_HOST	138	0.433151	1.48794	0.0403071	0.263543	1	2987	tags=32%, list=19%, signal=39%
GOBP_REGULATION_OF_NMDA_RECEPTOR_ACTIVITY	GOBP_REGULATION_OF_NMDA_RECEPTOR_ACTIVITY	34	0.638326	1.48788	0.0299401	0.263197	1	837	tags=24%, list=5%, signal=25%
GOBP_NEGATIVE_REGULATION_OF_BLOOD_CIRCULATION	GOBP_NEGATIVE_REGULATION_OF_BLOOD_CIRCULATION	20	0.665836	1.48746	0.0272374	0.263579	1	2621	tags=45%, list=17%, signal=54%
GOBP_MONOCYTE_DIFFERENTIATION	GOBP_MONOCYTE_DIFFERENTIATION	32	0.544292	1.48684	0.0563107	0.264276	1	3535	tags=47%, list=23%, signal=61%
GOCC_GOLGI_ASSOCIATED_VESICLE_MEMBRANE	GOCC_GOLGI_ASSOCIATED_VESICLE_MEMBRANE	45	0.416787	1.48672	0.0588235	0.264076	1	1744	tags=11%, list=11%, signal=12%
GOBP_REGULATION_OF_CELLULAR_RESPONSE_TO_TRANSFORMING_GROWTH_FACTOR_BETA_STIMULUS	GOBP_REGULATION_OF_CELLULAR_RESPONSE_TO_TRANSFORMING_GROWTH_FACTOR_BETA_STIMULUS	115	0.429177	1.48666	0.0389864	0.263761	1	2658	tags=24%, list=17%, signal=29%
GOBP_DNA_CATABOLIC_PROCESS	GOBP_DNA_CATABOLIC_PROCESS	36	0.44254	1.48646	0.0340681	0.263671	1	442	tags=8%, list=3%, signal=9%
GOBP_CHEMOKINE_C_X_C_MOTIF_LIGAND_2_PRODUCTION	GOBP_CHEMOKINE_C_X_C_MOTIF_LIGAND_2_PRODUCTION	15	0.6302	1.48535	0.0502901	0.26512	1	2211	tags=40%, list=14%, signal=47%
GOBP_INTERFERON_GAMMA_MEDIATED_SIGNALING_PATHWAY	GOBP_INTERFERON_GAMMA_MEDIATED_SIGNALING_PATHWAY	80	0.506481	1.48486	0.0868687	0.265623	1	4251	tags=52%, list=28%, signal=72%
GOBP_VASCULAR_ENDOTHELIAL_GROWTH_FACTOR_PRODUCTION	GOBP_VASCULAR_ENDOTHELIAL_GROWTH_FACTOR_PRODUCTION	33	0.62233	1.48465	0.0291262	0.265585	1	2796	tags=52%, list=18%, signal=63%
GOBP_TOLERANCE_INDUCTION	GOBP_TOLERANCE_INDUCTION	25	0.666609	1.48462	0.0557769	0.265207	1	4179	tags=72%, list=27%, signal=99%
GOBP_RUFFLE_ASSEMBLY	GOBP_RUFFLE_ASSEMBLY	39	0.463179	1.48459	0.0382294	0.264838	1	2995	tags=33%, list=20%, signal=41%
GOBP_PHOSPHATIDYLINOSITOL_3_KINASE_SIGNALING	GOBP_PHOSPHATIDYLINOSITOL_3_KINASE_SIGNALING	139	0.490614	1.4845	0.0324427	0.264607	1	2158	tags=28%, list=14%, signal=32%
GOBP_LEUKOCYTE_HOMEOSTASIS	GOBP_LEUKOCYTE_HOMEOSTASIS	76	0.522019	1.48448	0.0532787	0.264209	1	3017	tags=41%, list=20%, signal=51%
GOBP_DOPAMINE_RECEPTOR_SIGNALING_PATHWAY	GOBP_DOPAMINE_RECEPTOR_SIGNALING_PATHWAY	36	0.502613	1.48439	0.0448343	0.263909	1	2563	tags=31%, list=17%, signal=37%
GOBP_REGULATION_OF_SYNAPTIC_VESICLE_RECYCLING	GOBP_REGULATION_OF_SYNAPTIC_VESICLE_RECYCLING	21	0.558996	1.48391	0.058	0.26427	1	2214	tags=24%, list=14%, signal=28%
GOBP_POSITIVE_REGULATION_OF_CHEMOTAXIS	GOBP_POSITIVE_REGULATION_OF_CHEMOTAXIS	129	0.518898	1.4838	0.0294695	0.264093	1	3403	tags=47%, list=22%, signal=60%
GOMF_MAP_KINASE_KINASE_KINASE_ACTIVITY	GOMF_MAP_KINASE_KINASE_KINASE_ACTIVITY	23	0.448642	1.48369	0.0869565	0.263874	1	3358	tags=35%, list=22%, signal=44%
GOBP_MEMBRANE_DEPOLARIZATION_DURING_ACTION_POTENTIAL	GOBP_MEMBRANE_DEPOLARIZATION_DURING_ACTION_POTENTIAL	35	0.640981	1.48354	0.0268199	0.263732	1	2010	tags=37%, list=13%, signal=43%
GOMF_VOLTAGE_GATED_CALCIUM_CHANNEL_ACTIVITY	GOMF_VOLTAGE_GATED_CALCIUM_CHANNEL_ACTIVITY	42	0.524636	1.4832	0.0278884	0.263922	1	2635	tags=29%, list=17%, signal=34%
GOBP_NECROTIC_CELL_DEATH	GOBP_NECROTIC_CELL_DEATH	51	0.428178	1.48312	0.0752896	0.263641	1	3231	tags=31%, list=21%, signal=40%
GOBP_REGULATION_OF_CALCIUM_ION_TRANSMEMBRANE_TRANSPORT	GOBP_REGULATION_OF_CALCIUM_ION_TRANSMEMBRANE_TRANSPORT	127	0.49681	1.4829	0.0153551	0.263597	1	3353	tags=43%, list=22%, signal=54%
GOBP_CELLULAR_RESPONSE_TO_LOW_DENSITY_LIPOPROTEIN_PARTICLE_STIMULUS	GOBP_CELLULAR_RESPONSE_TO_LOW_DENSITY_LIPOPROTEIN_PARTICLE_STIMULUS	18	0.634784	1.48259	0.0542056	0.263706	1	3575	tags=56%, list=23%, signal=72%
GOBP_REGULATION_OF_ISOTYPE_SWITCHING	GOBP_REGULATION_OF_ISOTYPE_SWITCHING	27	0.571149	1.4825	0.0866142	0.263447	1	2032	tags=30%, list=13%, signal=34%
GOBP_REGULATION_OF_BICELLULAR_TIGHT_JUNCTION_ASSEMBLY	GOBP_REGULATION_OF_BICELLULAR_TIGHT_JUNCTION_ASSEMBLY	23	0.523649	1.48226	0.0430528	0.263479	1	3350	tags=35%, list=22%, signal=44%
GOBP_INOSITOL_LIPID_MEDIATED_SIGNALING	GOBP_INOSITOL_LIPID_MEDIATED_SIGNALING	178	0.474639	1.48216	0.0289575	0.263258	1	3115	tags=35%, list=20%, signal=43%
GOBP_GLYCEROPHOSPHOLIPID_METABOLIC_PROCESS	GOBP_GLYCEROPHOSPHOLIPID_METABOLIC_PROCESS	311	0.346146	1.48163	0.0199601	0.263832	1	4362	tags=35%, list=28%, signal=48%
GOBP_NEGATIVE_REGULATION_OF_MUSCLE_CELL_APOPTOTIC_PROCESS	GOBP_NEGATIVE_REGULATION_OF_MUSCLE_CELL_APOPTOTIC_PROCESS	32	0.555904	1.48134	0.0367505	0.263945	1	2862	tags=38%, list=19%, signal=46%
GOBP_NEURON_PROJECTION_ARBORIZATION	GOBP_NEURON_PROJECTION_ARBORIZATION	27	0.5652	1.48083	0.0423387	0.264426	1	2915	tags=37%, list=19%, signal=46%
GOBP_REGULATION_OF_CELL_FATE_COMMITMENT	GOBP_REGULATION_OF_CELL_FATE_COMMITMENT	26	0.593847	1.48066	0.024	0.264273	1	1988	tags=31%, list=13%, signal=35%
GOBP_ACTIN_FILAMENT_BASED_TRANSPORT	GOBP_ACTIN_FILAMENT_BASED_TRANSPORT	20	0.541868	1.48035	0.0525292	0.264384	1	3929	tags=45%, list=26%, signal=60%
GOBP_LUNG_MORPHOGENESIS	GOBP_LUNG_MORPHOGENESIS	47	0.507127	1.4796	0.0415094	0.265195	1	2352	tags=28%, list=15%, signal=33%
GOBP_INTERLEUKIN_13_PRODUCTION	GOBP_INTERLEUKIN_13_PRODUCTION	18	0.620941	1.47957	0.0362595	0.264837	1	1819	tags=33%, list=12%, signal=38%
GOBP_INTERFERON_GAMMA_PRODUCTION	GOBP_INTERFERON_GAMMA_PRODUCTION	100	0.618017	1.47951	0.0668016	0.264564	1	2989	tags=57%, list=19%, signal=70%
GOMF_CARBOXYLIC_ESTER_HYDROLASE_ACTIVITY	GOMF_CARBOXYLIC_ESTER_HYDROLASE_ACTIVITY	116	0.462292	1.47917	0.03	0.264673	1	3468	tags=33%, list=23%, signal=42%
GOCC_ENDOSOME_LUMEN	GOCC_ENDOSOME_LUMEN	30	0.591437	1.47913	0.04375	0.264336	1	2051	tags=33%, list=13%, signal=38%
GOBP_ATP_TRANSPORT	GOBP_ATP_TRANSPORT	17	0.501569	1.47907	0.0497238	0.264003	1	3366	tags=35%, list=22%, signal=45%
GOBP_NEGATIVE_REGULATION_OF_ALPHA_BETA_T_CELL_ACTIVATION	GOBP_NEGATIVE_REGULATION_OF_ALPHA_BETA_T_CELL_ACTIVATION	34	0.553772	1.47865	0.083004	0.264358	1	2491	tags=35%, list=16%, signal=42%
GOBP_NEGATIVE_REGULATION_OF_LYASE_ACTIVITY	GOBP_NEGATIVE_REGULATION_OF_LYASE_ACTIVITY	23	0.594431	1.47796	0.0253906	0.265197	1	3078	tags=39%, list=20%, signal=49%
GOBP_REGULATION_OF_AMYLOID_PRECURSOR_PROTEIN_CATABOLIC_PROCESS	GOBP_REGULATION_OF_AMYLOID_PRECURSOR_PROTEIN_CATABOLIC_PROCESS	38	0.479828	1.47747	0.0604288	0.265601	1	3751	tags=39%, list=24%, signal=52%
GOBP_NEGATIVE_REGULATION_OF_ORGAN_GROWTH	GOBP_NEGATIVE_REGULATION_OF_ORGAN_GROWTH	30	0.513742	1.47739	0.074856	0.26532	1	3800	tags=43%, list=25%, signal=57%
GOCC_LAMELLAR_BODY	GOCC_LAMELLAR_BODY	16	0.758812	1.47683	0.0246407	0.265915	1	599	tags=50%, list=4%, signal=52%
GOBP_REGULATION_OF_PROTEIN_LOCALIZATION_TO_PLASMA_MEMBRANE	GOBP_REGULATION_OF_PROTEIN_LOCALIZATION_TO_PLASMA_MEMBRANE	93	0.406063	1.47663	0.0220441	0.265878	1	4069	tags=34%, list=26%, signal=47%
GOBP_POSITIVE_REGULATION_OF_INTERLEUKIN_8_PRODUCTION	GOBP_POSITIVE_REGULATION_OF_INTERLEUKIN_8_PRODUCTION	54	0.544514	1.47654	0.0400802	0.26565	1	2934	tags=37%, list=19%, signal=46%
GOBP_LYMPHOCYTE_MIGRATION	GOBP_LYMPHOCYTE_MIGRATION	93	0.591118	1.47647	0.0533881	0.265372	1	2511	tags=44%, list=16%, signal=52%
GOBP_SUPEROXIDE_METABOLIC_PROCESS	GOBP_SUPEROXIDE_METABOLIC_PROCESS	60	0.50627	1.47629	0.0340681	0.265283	1	2686	tags=38%, list=17%, signal=46%
GOBP_NEGATIVE_REGULATION_OF_PROTEIN_ACETYLATION	GOBP_NEGATIVE_REGULATION_OF_PROTEIN_ACETYLATION	21	0.491966	1.4761	0.0560928	0.265217	1	2032	tags=24%, list=13%, signal=27%
GOCC_INFLAMMASOME_COMPLEX	GOCC_INFLAMMASOME_COMPLEX	15	0.672265	1.47485	0.0582524	0.267032	1	2954	tags=67%, list=19%, signal=82%
GOBP_NEGATIVE_REGULATION_OF_ANDROGEN_RECEPTOR_SIGNALING_PATHWAY	GOBP_NEGATIVE_REGULATION_OF_ANDROGEN_RECEPTOR_SIGNALING_PATHWAY	15	0.586435	1.47463	0.0536044	0.267037	1	1121	tags=13%, list=7%, signal=14%
GOBP_MYOBLAST_FUSION	GOBP_MYOBLAST_FUSION	36	0.505973	1.47408	0.0263653	0.267628	1	3623	tags=44%, list=24%, signal=58%
GOBP_VIRAL_GENOME_REPLICATION	GOBP_VIRAL_GENOME_REPLICATION	113	0.390526	1.47365	0.0872093	0.268026	1	3790	tags=30%, list=25%, signal=40%
GOBP_POSITIVE_REGULATION_OF_PEPTIDASE_ACTIVITY	GOBP_POSITIVE_REGULATION_OF_PEPTIDASE_ACTIVITY	179	0.403148	1.4723	0.0305499	0.2701	1	3365	tags=31%, list=22%, signal=39%
GOBP_POSITIVE_REGULATION_OF_PROTEIN_POLYMERIZATION	GOBP_POSITIVE_REGULATION_OF_PROTEIN_POLYMERIZATION	117	0.388728	1.47211	0.018797	0.270042	1	2818	tags=25%, list=18%, signal=30%
GOBP_NEGATIVE_REGULATION_OF_LOCOMOTION	GOBP_NEGATIVE_REGULATION_OF_LOCOMOTION	272	0.448571	1.47209	0.0448598	0.269664	1	3266	tags=35%, list=21%, signal=44%
GOBP_POSITIVE_REGULATION_OF_HISTONE_DEACETYLATION	GOBP_POSITIVE_REGULATION_OF_HISTONE_DEACETYLATION	17	0.51146	1.47196	0.0841889	0.269492	1	1154	tags=12%, list=8%, signal=13%
GOBP_PROTEIN_LOCALIZATION_TO_CILIUM	GOBP_PROTEIN_LOCALIZATION_TO_CILIUM	52	0.482669	1.47176	0.0972222	0.269409	1	4714	tags=48%, list=31%, signal=69%
GOBP_REGULATION_OF_HUMORAL_IMMUNE_RESPONSE	GOBP_REGULATION_OF_HUMORAL_IMMUNE_RESPONSE	68	0.596846	1.47143	0.0320641	0.269558	1	3331	tags=62%, list=22%, signal=79%
GOBP_NECROPTOTIC_PROCESS	GOBP_NECROPTOTIC_PROCESS	34	0.490364	1.47118	0.0862745	0.2696	1	3231	tags=38%, list=21%, signal=48%
GOBP_POSITIVE_REGULATION_OF_SMALL_GTPASE_MEDIATED_SIGNAL_TRANSDUCTION	GOBP_POSITIVE_REGULATION_OF_SMALL_GTPASE_MEDIATED_SIGNAL_TRANSDUCTION	73	0.488714	1.47101	0.0239521	0.269485	1	3552	tags=40%, list=23%, signal=51%
GOBP_ORGANIC_CATION_TRANSPORT	GOBP_ORGANIC_CATION_TRANSPORT	31	0.54362	1.47052	0.0443548	0.269857	1	3366	tags=35%, list=22%, signal=45%
GOBP_REGULATION_OF_VASCULAR_ASSOCIATED_SMOOTH_MUSCLE_CELL_PROLIFERATION	GOBP_REGULATION_OF_VASCULAR_ASSOCIATED_SMOOTH_MUSCLE_CELL_PROLIFERATION	48	0.552976	1.46976	0.0635514	0.270842	1	3078	tags=40%, list=20%, signal=49%
GOBP_ANTIGEN_PROCESSING_AND_PRESENTATION_OF_PEPTIDE_ANTIGEN_VIA_MHC_CLASS_I	GOBP_ANTIGEN_PROCESSING_AND_PRESENTATION_OF_PEPTIDE_ANTIGEN_VIA_MHC_CLASS_I	92	0.371744	1.46958	0.141988	0.270731	1	2158	tags=15%, list=14%, signal=18%
GOBP_POSITIVE_REGULATION_OF_PROTEIN_DEPHOSPHORYLATION	GOBP_POSITIVE_REGULATION_OF_PROTEIN_DEPHOSPHORYLATION	40	0.486908	1.46956	0.0617761	0.270368	1	3914	tags=45%, list=25%, signal=60%
GOBP_POSITIVE_REGULATION_OF_ERK1_AND_ERK2_CASCADE	GOBP_POSITIVE_REGULATION_OF_ERK1_AND_ERK2_CASCADE	167	0.495268	1.4693	0.0283019	0.270367	1	3308	tags=45%, list=22%, signal=57%
GOBP_POSITIVE_REGULATION_OF_PROTEIN_BINDING	GOBP_POSITIVE_REGULATION_OF_PROTEIN_BINDING	80	0.417769	1.469	0.0634921	0.270491	1	3567	tags=28%, list=23%, signal=36%
GOBP_REGULATION_OF_INFLAMMATORY_RESPONSE_TO_ANTIGENIC_STIMULUS	GOBP_REGULATION_OF_INFLAMMATORY_RESPONSE_TO_ANTIGENIC_STIMULUS	23	0.716233	1.46892	0.0404858	0.27024	1	3086	tags=70%, list=20%, signal=87%
GOBP_NOREPINEPHRINE_TRANSPORT	GOBP_NOREPINEPHRINE_TRANSPORT	21	0.647912	1.46864	0.0301205	0.270333	1	1049	tags=33%, list=7%, signal=36%
GOBP_POSITIVE_REGULATION_OF_PROTEIN_TARGETING_TO_MEMBRANE	GOBP_POSITIVE_REGULATION_OF_PROTEIN_TARGETING_TO_MEMBRANE	20	0.488084	1.46858	0.0639175	0.270042	1	3084	tags=35%, list=20%, signal=44%
GOBP_POSITIVE_REGULATION_OF_CARDIAC_MUSCLE_CELL_PROLIFERATION	GOBP_POSITIVE_REGULATION_OF_CARDIAC_MUSCLE_CELL_PROLIFERATION	22	0.622043	1.46836	0.0588235	0.270076	1	2352	tags=45%, list=15%, signal=54%
GOBP_REGULATION_OF_LIPID_CATABOLIC_PROCESS	GOBP_REGULATION_OF_LIPID_CATABOLIC_PROCESS	56	0.479804	1.468	0.0287356	0.270358	1	2621	tags=34%, list=17%, signal=41%
GOBP_NEGATIVE_REGULATION_OF_ATP_METABOLIC_PROCESS	GOBP_NEGATIVE_REGULATION_OF_ATP_METABOLIC_PROCESS	25	0.485371	1.46796	0.0590631	0.270057	1	2017	tags=20%, list=13%, signal=23%
GOBP_REGULATION_OF_PEPTIDYL_TYROSINE_PHOSPHORYLATION	GOBP_REGULATION_OF_PEPTIDYL_TYROSINE_PHOSPHORYLATION	233	0.453181	1.4675	0.0299401	0.270456	1	3211	tags=36%, list=21%, signal=44%
GOBP_T_HELPER_1_CELL_DIFFERENTIATION	GOBP_T_HELPER_1_CELL_DIFFERENTIATION	18	0.640303	1.4675	0.0675944	0.270073	1	3629	tags=56%, list=24%, signal=73%
GOCC_CELL_CELL_CONTACT_ZONE	GOCC_CELL_CELL_CONTACT_ZONE	65	0.502171	1.46684	0.0318949	0.270716	1	1962	tags=29%, list=13%, signal=33%
GOBP_MYD88_DEPENDENT_TOLL_LIKE_RECEPTOR_SIGNALING_PATHWAY	GOBP_MYD88_DEPENDENT_TOLL_LIKE_RECEPTOR_SIGNALING_PATHWAY	35	0.558973	1.46629	0.107784	0.27132	1	2307	tags=29%, list=15%, signal=34%
GOBP_POSITIVE_REGULATION_OF_DNA_BINDING_TRANSCRIPTION_FACTOR_ACTIVITY	GOBP_POSITIVE_REGULATION_OF_DNA_BINDING_TRANSCRIPTION_FACTOR_ACTIVITY	250	0.400078	1.46609	0.0253411	0.271286	1	2959	tags=26%, list=19%, signal=31%
GOBP_POSITIVE_REGULATION_OF_CYTOKINE_PRODUCTION_INVOLVED_IN_INFLAMMATORY_RESPONSE	GOBP_POSITIVE_REGULATION_OF_CYTOKINE_PRODUCTION_INVOLVED_IN_INFLAMMATORY_RESPONSE	20	0.612388	1.46601	0.0540541	0.271058	1	5234	tags=70%, list=34%, signal=106%
GOBP_RESPONSE_TO_INTERFERON_GAMMA	GOBP_RESPONSE_TO_INTERFERON_GAMMA	166	0.496947	1.46596	0.0665323	0.270751	1	3971	tags=46%, list=26%, signal=62%
GOBP_POSITIVE_REGULATION_OF_ACTIN_FILAMENT_BUNDLE_ASSEMBLY	GOBP_POSITIVE_REGULATION_OF_ACTIN_FILAMENT_BUNDLE_ASSEMBLY	58	0.454127	1.46588	0.0450281	0.270495	1	2961	tags=31%, list=19%, signal=38%
GOBP_POSITIVE_REGULATION_OF_T_HELPER_CELL_DIFFERENTIATION	GOBP_POSITIVE_REGULATION_OF_T_HELPER_CELL_DIFFERENTIATION	21	0.657178	1.46531	0.0678643	0.27107	1	4198	tags=76%, list=27%, signal=105%
GOBP_AMYLOID_BETA_METABOLIC_PROCESS	GOBP_AMYLOID_BETA_METABOLIC_PROCESS	50	0.436747	1.46455	0.0508806	0.27207	1	3751	tags=38%, list=24%, signal=50%
GOMF_PROTEIN_PHOSPHATASE_BINDING	GOMF_PROTEIN_PHOSPHATASE_BINDING	141	0.369202	1.46447	0.0385356	0.271858	1	1958	tags=18%, list=13%, signal=20%
GOBP_RESPONSE_TO_HYDROPEROXIDE	GOBP_RESPONSE_TO_HYDROPEROXIDE	15	0.54602	1.46363	0.0697674	0.27291	1	3914	tags=40%, list=25%, signal=54%
GOBP_POSITIVE_REGULATION_OF_CELL_PROJECTION_ORGANIZATION	GOBP_POSITIVE_REGULATION_OF_CELL_PROJECTION_ORGANIZATION	311	0.39864	1.4631	0.0277778	0.273425	1	3207	tags=28%, list=21%, signal=35%
GOBP_PROTEIN_DEPHOSPHORYLATION	GOBP_PROTEIN_DEPHOSPHORYLATION	291	0.331248	1.46308	0.0156863	0.273073	1	3078	tags=23%, list=20%, signal=29%
GOMF_DYNEIN_LIGHT_INTERMEDIATE_CHAIN_BINDING	GOMF_DYNEIN_LIGHT_INTERMEDIATE_CHAIN_BINDING	27	0.612075	1.46268	0.0988142	0.273377	1	3282	tags=52%, list=21%, signal=66%
GOBP_POSITIVE_REGULATION_OF_MAST_CELL_ACTIVATION	GOBP_POSITIVE_REGULATION_OF_MAST_CELL_ACTIVATION	18	0.619395	1.46267	0.0542636	0.273005	1	2330	tags=44%, list=15%, signal=52%
GOBP_CELLULAR_COMPONENT_ASSEMBLY_INVOLVED_IN_MORPHOGENESIS	GOBP_CELLULAR_COMPONENT_ASSEMBLY_INVOLVED_IN_MORPHOGENESIS	91	0.490527	1.46261	0.029703	0.27271	1	2852	tags=32%, list=19%, signal=39%
GOBP_NEGATIVE_REGULATION_OF_CYTOKINE_PRODUCTION_INVOLVED_IN_IMMUNE_RESPONSE	GOBP_NEGATIVE_REGULATION_OF_CYTOKINE_PRODUCTION_INVOLVED_IN_IMMUNE_RESPONSE	26	0.635967	1.46241	0.0513834	0.272645	1	3653	tags=65%, list=24%, signal=86%
GOBP_POSITIVE_REGULATION_OF_TRANSMEMBRANE_TRANSPORT	GOBP_POSITIVE_REGULATION_OF_TRANSMEMBRANE_TRANSPORT	179	0.457837	1.46196	0.011811	0.273093	1	3353	tags=39%, list=22%, signal=49%
GOMF_FIBROBLAST_GROWTH_FACTOR_BINDING	GOMF_FIBROBLAST_GROWTH_FACTOR_BINDING	23	0.589611	1.46177	0.0447154	0.273051	1	3733	tags=39%, list=24%, signal=52%
GOBP_BIOLOGICAL_PROCESS_INVOLVED_IN_INTERACTION_WITH_HOST	GOBP_BIOLOGICAL_PROCESS_INVOLVED_IN_INTERACTION_WITH_HOST	195	0.367875	1.46172	0.0465116	0.27274	1	2987	tags=25%, list=19%, signal=31%
GOBP_REGULATION_OF_CD8_POSITIVE_ALPHA_BETA_T_CELL_ACTIVATION	GOBP_REGULATION_OF_CD8_POSITIVE_ALPHA_BETA_T_CELL_ACTIVATION	16	0.702424	1.46144	0.0714286	0.27282	1	3653	tags=75%, list=24%, signal=98%
GOBP_NEGATIVE_REGULATION_OF_LIPID_CATABOLIC_PROCESS	GOBP_NEGATIVE_REGULATION_OF_LIPID_CATABOLIC_PROCESS	21	0.614694	1.4614	0.0445344	0.272512	1	2621	tags=57%, list=17%, signal=69%
GOBP_HINDLIMB_MORPHOGENESIS	GOBP_HINDLIMB_MORPHOGENESIS	32	0.582508	1.46117	0.0285132	0.272505	1	1420	tags=31%, list=9%, signal=34%
GOCC_FICOLIN_1_RICH_GRANULE_LUMEN	GOCC_FICOLIN_1_RICH_GRANULE_LUMEN	120	0.346168	1.46097	0.131274	0.272461	1	2901	tags=18%, list=19%, signal=21%
GOBP_NEGATIVE_REGULATION_OF_REGULATED_SECRETORY_PATHWAY	GOBP_NEGATIVE_REGULATION_OF_REGULATED_SECRETORY_PATHWAY	19	0.624018	1.46093	0.0552268	0.272132	1	3086	tags=53%, list=20%, signal=66%
GOBP_3_UTR_MEDIATED_MRNA_DESTABILIZATION	GOBP_3_UTR_MEDIATED_MRNA_DESTABILIZATION	17	0.529193	1.46082	0.0770751	0.271934	1	4337	tags=47%, list=28%, signal=66%
GOBP_REGULATION_OF_MONOOXYGENASE_ACTIVITY	GOBP_REGULATION_OF_MONOOXYGENASE_ACTIVITY	56	0.472096	1.46069	0.0344168	0.271766	1	3472	tags=36%, list=23%, signal=46%
GOBP_REGULATION_OF_LEUKOCYTE_APOPTOTIC_PROCESS	GOBP_REGULATION_OF_LEUKOCYTE_APOPTOTIC_PROCESS	74	0.502504	1.46045	0.0517598	0.271803	1	3515	tags=46%, list=23%, signal=59%
GOBP_HYDROGEN_PEROXIDE_METABOLIC_PROCESS	GOBP_HYDROGEN_PEROXIDE_METABOLIC_PROCESS	48	0.500143	1.46036	0.037037	0.27157	1	1966	tags=23%, list=13%, signal=26%
GOBP_POSITIVE_REGULATION_OF_PEPTIDYL_TYROSINE_PHOSPHORYLATION	GOBP_POSITIVE_REGULATION_OF_PEPTIDYL_TYROSINE_PHOSPHORYLATION	174	0.480777	1.46013	0.0219124	0.271632	1	3211	tags=39%, list=21%, signal=49%
GOMF_PHOSPHATASE_REGULATOR_ACTIVITY	GOMF_PHOSPHATASE_REGULATOR_ACTIVITY	89	0.391684	1.46012	0.045098	0.271258	1	3075	tags=25%, list=20%, signal=31%
GOBP_SARCOMERE_ORGANIZATION	GOBP_SARCOMERE_ORGANIZATION	36	0.578817	1.45962	0.0319361	0.271763	1	1247	tags=25%, list=8%, signal=27%
GOBP_NATURAL_KILLER_CELL_MEDIATED_IMMUNITY	GOBP_NATURAL_KILLER_CELL_MEDIATED_IMMUNITY	54	0.621795	1.45858	0.0776699	0.273196	1	2560	tags=46%, list=17%, signal=55%
GOBP_FLUID_TRANSPORT	GOBP_FLUID_TRANSPORT	31	0.607679	1.45854	0.0358566	0.272887	1	2027	tags=32%, list=13%, signal=37%
GOMF_PROTEIN_KINASE_A_REGULATORY_SUBUNIT_BINDING	GOMF_PROTEIN_KINASE_A_REGULATORY_SUBUNIT_BINDING	23	0.553228	1.45821	0.0516899	0.273064	1	1858	tags=26%, list=12%, signal=30%
GOBP_NEGATIVE_REGULATION_OF_NEURAL_PRECURSOR_CELL_PROLIFERATION	GOBP_NEGATIVE_REGULATION_OF_NEURAL_PRECURSOR_CELL_PROLIFERATION	18	0.573698	1.45821	0.0715746	0.272692	1	2540	tags=33%, list=17%, signal=40%
GOBP_ENDOCARDIAL_CUSHION_DEVELOPMENT	GOBP_ENDOCARDIAL_CUSHION_DEVELOPMENT	42	0.577485	1.45797	0.0538462	0.27276	1	2254	tags=33%, list=15%, signal=39%
GOBP_NEGATIVE_REGULATION_OF_PROTEIN_MODIFICATION_PROCESS	GOBP_NEGATIVE_REGULATION_OF_PROTEIN_MODIFICATION_PROCESS	478	0.335896	1.45751	0.0114286	0.273142	1	2776	tags=22%, list=18%, signal=26%
GOBP_ERYTHROCYTE_DEVELOPMENT	GOBP_ERYTHROCYTE_DEVELOPMENT	28	0.44355	1.45745	0.0970874	0.272861	1	2532	tags=25%, list=16%, signal=30%
GOBP_MOVEMENT_IN_HOST_ENVIRONMENT	GOBP_MOVEMENT_IN_HOST_ENVIRONMENT	159	0.400402	1.45725	0.0483559	0.272871	1	2987	tags=28%, list=19%, signal=35%
GOCC_T_CELL_RECEPTOR_COMPLEX	GOCC_T_CELL_RECEPTOR_COMPLEX	17	0.791614	1.45705	0.0603113	0.272885	1	2560	tags=82%, list=17%, signal=99%
GOBP_CELLULAR_SODIUM_ION_HOMEOSTASIS	GOBP_CELLULAR_SODIUM_ION_HOMEOSTASIS	19	0.651977	1.45704	0.0406977	0.272523	1	2192	tags=42%, list=14%, signal=49%
GOBP_PHOSPHOLIPASE_C_ACTIVATING_G_PROTEIN_COUPLED_RECEPTOR_SIGNALING_PATHWAY	GOBP_PHOSPHOLIPASE_C_ACTIVATING_G_PROTEIN_COUPLED_RECEPTOR_SIGNALING_PATHWAY	96	0.538732	1.45682	0.0212766	0.272537	1	2249	tags=33%, list=15%, signal=39%
GOBP_REGULATION_OF_ACTIN_CYTOSKELETON_REORGANIZATION	GOBP_REGULATION_OF_ACTIN_CYTOSKELETON_REORGANIZATION	38	0.497094	1.45651	0.0601942	0.272673	1	2045	tags=29%, list=13%, signal=33%
GOMF_CATION_CHLORIDE_SYMPORTER_ACTIVITY	GOMF_CATION_CHLORIDE_SYMPORTER_ACTIVITY	17	0.603063	1.45639	0.036961	0.272492	1	287	tags=18%, list=2%, signal=18%
GOMF_PROTEIN_ADP_RIBOSYLASE_ACTIVITY	GOMF_PROTEIN_ADP_RIBOSYLASE_ACTIVITY	16	0.51878	1.45629	0.110442	0.272298	1	4124	tags=38%, list=27%, signal=51%
GOBP_REGULATION_OF_MACROPHAGE_DERIVED_FOAM_CELL_DIFFERENTIATION	GOBP_REGULATION_OF_MACROPHAGE_DERIVED_FOAM_CELL_DIFFERENTIATION	31	0.638216	1.4562	0.0394477	0.272097	1	3093	tags=55%, list=20%, signal=69%
GOBP_COAGULATION	GOBP_COAGULATION	308	0.433393	1.45524	0.0332681	0.273342	1	3536	tags=35%, list=23%, signal=45%
GOBP_HOMEOSTASIS_OF_NUMBER_OF_CELLS	GOBP_HOMEOSTASIS_OF_NUMBER_OF_CELLS	228	0.393771	1.4549	0.0441459	0.273566	1	2942	tags=27%, list=19%, signal=33%
GOCC_INTERCALATED_DISC	GOCC_INTERCALATED_DISC	48	0.53846	1.45433	0.0256917	0.274203	1	1962	tags=33%, list=13%, signal=38%
GOBP_REGULATION_OF_VIRAL_LIFE_CYCLE	GOBP_REGULATION_OF_VIRAL_LIFE_CYCLE	131	0.395017	1.45415	0.0852713	0.274116	1	2799	tags=27%, list=18%, signal=32%
GOBP_REGULATION_OF_RIG_I_SIGNALING_PATHWAY	GOBP_REGULATION_OF_RIG_I_SIGNALING_PATHWAY	16	0.479765	1.45384	0.112811	0.274298	1	2695	tags=25%, list=18%, signal=30%
GOBP_RECEPTOR_METABOLIC_PROCESS	GOBP_RECEPTOR_METABOLIC_PROCESS	153	0.390619	1.45352	0.0368217	0.274428	1	4028	tags=35%, list=26%, signal=46%
GOMF_ACTININ_BINDING	GOMF_ACTININ_BINDING	33	0.589456	1.45337	0.0488281	0.274309	1	3909	tags=58%, list=25%, signal=77%
GOBP_PHOSPHOLIPID_METABOLIC_PROCESS	GOBP_PHOSPHOLIPID_METABOLIC_PROCESS	368	0.344589	1.45333	0.0335968	0.273991	1	4362	tags=33%, list=28%, signal=45%
GOBP_MESENCHYME_MORPHOGENESIS	GOBP_MESENCHYME_MORPHOGENESIS	48	0.567342	1.45286	0.0696799	0.27445	1	2791	tags=33%, list=18%, signal=41%
GOCC_CORTICAL_CYTOSKELETON	GOCC_CORTICAL_CYTOSKELETON	98	0.428156	1.45184	0.039604	0.275896	1	3210	tags=34%, list=21%, signal=42%
GOBP_LYTIC_VACUOLE_ORGANIZATION	GOBP_LYTIC_VACUOLE_ORGANIZATION	63	0.333815	1.45145	0.0866935	0.276194	1	4013	tags=27%, list=26%, signal=36%
GOBP_POSITIVE_REGULATION_OF_LOCOMOTION	GOBP_POSITIVE_REGULATION_OF_LOCOMOTION	490	0.435392	1.45077	0.0473485	0.277007	1	3403	tags=36%, list=22%, signal=45%
GOBP_POSITIVE_REGULATION_OF_ORGAN_GROWTH	GOBP_POSITIVE_REGULATION_OF_ORGAN_GROWTH	41	0.554589	1.45048	0.0644531	0.277121	1	2352	tags=37%, list=15%, signal=43%
GOBP_MUSCLE_HYPERTROPHY	GOBP_MUSCLE_HYPERTROPHY	79	0.46493	1.45039	0.0568627	0.276908	1	3174	tags=30%, list=21%, signal=38%
GOBP_POSITIVE_REGULATION_OF_JUN_KINASE_ACTIVITY	GOBP_POSITIVE_REGULATION_OF_JUN_KINASE_ACTIVITY	64	0.434059	1.45029	0.0691057	0.276722	1	3136	tags=33%, list=20%, signal=41%
GOBP_COMPLEMENT_ACTIVATION	GOBP_COMPLEMENT_ACTIVATION	62	0.585347	1.45027	0.0582524	0.276389	1	3331	tags=55%, list=22%, signal=70%
GOBP_DNA_CATABOLIC_PROCESS_ENDONUCLEOLYTIC	GOBP_DNA_CATABOLIC_PROCESS_ENDONUCLEOLYTIC	27	0.481365	1.45017	0.072407	0.276206	1	74	tags=7%, list=0%, signal=7%
GOBP_POSITIVE_REGULATION_OF_DEFENSE_RESPONSE	GOBP_POSITIVE_REGULATION_OF_DEFENSE_RESPONSE	320	0.47218	1.45016	0.062249	0.27587	1	3093	tags=32%, list=20%, signal=39%
GOMF_ENZYME_ACTIVATOR_ACTIVITY	GOMF_ENZYME_ACTIVATOR_ACTIVITY	472	0.310351	1.44992	0.0243446	0.27588	1	3338	tags=25%, list=22%, signal=31%
GOBP_REGULATION_OF_CHOLESTEROL_EFFLUX	GOBP_REGULATION_OF_CHOLESTEROL_EFFLUX	29	0.548249	1.44984	0.046875	0.275668	1	3469	tags=41%, list=23%, signal=53%
GOBP_CELL_CHEMOTAXIS	GOBP_CELL_CHEMOTAXIS	251	0.505483	1.44946	0.0410156	0.275957	1	3152	tags=42%, list=21%, signal=52%
GOBP_POSITIVE_REGULATION_OF_PROTEIN_DEACETYLATION	GOBP_POSITIVE_REGULATION_OF_PROTEIN_DEACETYLATION	22	0.464455	1.4494	0.0742188	0.275697	1	3211	tags=23%, list=21%, signal=29%
GOCC_ACTIN_FILAMENT	GOCC_ACTIN_FILAMENT	104	0.429284	1.44927	0.0673077	0.275571	1	3787	tags=38%, list=25%, signal=49%
GOBP_CELLULAR_RESPONSE_TO_EXTERNAL_STIMULUS	GOBP_CELLULAR_RESPONSE_TO_EXTERNAL_STIMULUS	274	0.368247	1.44926	0.0273973	0.275224	1	3204	tags=26%, list=21%, signal=32%
GOCC_A_BAND	GOCC_A_BAND	35	0.569121	1.44913	0.0473251	0.275093	1	3192	tags=43%, list=21%, signal=54%
GOBP_PEPTIDYL_TYROSINE_AUTOPHOSPHORYLATION	GOBP_PEPTIDYL_TYROSINE_AUTOPHOSPHORYLATION	21	0.579511	1.44909	0.0776699	0.274812	1	1918	tags=38%, list=12%, signal=43%
GOBP_PHOSPHATIDYLINOSITOL_BIOSYNTHETIC_PROCESS	GOBP_PHOSPHATIDYLINOSITOL_BIOSYNTHETIC_PROCESS	108	0.325659	1.44899	0.0555556	0.274654	1	4665	tags=38%, list=30%, signal=54%
GOBP_PROTEIN_LOCALIZATION_TO_PLASMA_MEMBRANE	GOBP_PROTEIN_LOCALIZATION_TO_PLASMA_MEMBRANE	255	0.349376	1.44871	0.0286807	0.274834	1	4270	tags=34%, list=28%, signal=46%
GOBP_REGULATION_OF_DEFENSE_RESPONSE_TO_VIRUS_BY_HOST	GOBP_REGULATION_OF_DEFENSE_RESPONSE_TO_VIRUS_BY_HOST	35	0.560051	1.44812	0.0935673	0.275398	1	2453	tags=31%, list=16%, signal=37%
GOBP_N_GLYCAN_PROCESSING	GOBP_N_GLYCAN_PROCESSING	18	0.544257	1.44809	0.0868687	0.27508	1	4576	tags=50%, list=30%, signal=71%
GOBP_NEGATIVE_REGULATION_OF_CATABOLIC_PROCESS	GOBP_NEGATIVE_REGULATION_OF_CATABOLIC_PROCESS	266	0.298696	1.44768	0.0198413	0.275471	1	3622	tags=23%, list=24%, signal=30%
GOBP_SUPEROXIDE_ANION_GENERATION	GOBP_SUPEROXIDE_ANION_GENERATION	33	0.566543	1.44755	0.0319361	0.275363	1	2248	tags=45%, list=15%, signal=53%
GOMF_FAD_BINDING	GOMF_FAD_BINDING	31	0.471271	1.44724	0.0708502	0.275505	1	3657	tags=35%, list=24%, signal=46%
GOBP_POSITIVE_REGULATION_OF_B_CELL_MEDIATED_IMMUNITY	GOBP_POSITIVE_REGULATION_OF_B_CELL_MEDIATED_IMMUNITY	29	0.623906	1.44618	0.0828283	0.276987	1	1299	tags=34%, list=8%, signal=38%
GOBP_NEGATIVE_REGULATION_OF_PEPTIDYL_LYSINE_ACETYLATION	GOBP_NEGATIVE_REGULATION_OF_PEPTIDYL_LYSINE_ACETYLATION	19	0.505195	1.4461	0.0584795	0.276783	1	2032	tags=26%, list=13%, signal=30%
GOBP_VASCULAR_ENDOTHELIAL_GROWTH_FACTOR_RECEPTOR_SIGNALING_PATHWAY	GOBP_VASCULAR_ENDOTHELIAL_GROWTH_FACTOR_RECEPTOR_SIGNALING_PATHWAY	86	0.440162	1.44583	0.098	0.276839	1	3800	tags=34%, list=25%, signal=45%
GOBP_POSITIVE_REGULATION_OF_PHOSPHOPROTEIN_PHOSPHATASE_ACTIVITY	GOBP_POSITIVE_REGULATION_OF_PHOSPHOPROTEIN_PHOSPHATASE_ACTIVITY	19	0.584004	1.44571	0.0931559	0.27665	1	1651	tags=26%, list=11%, signal=29%
GOBP_REGULATION_OF_ENDOCYTOSIS	GOBP_REGULATION_OF_ENDOCYTOSIS	195	0.40038	1.44565	0.0359281	0.276397	1	3869	tags=33%, list=25%, signal=44%
GOBP_POSITIVE_REGULATION_OF_ISOTYPE_SWITCHING	GOBP_POSITIVE_REGULATION_OF_ISOTYPE_SWITCHING	18	0.610741	1.44552	0.0889328	0.276269	1	1299	tags=28%, list=8%, signal=30%
GOBP_RESPONSE_TO_ATP	GOBP_RESPONSE_TO_ATP	29	0.543508	1.44539	0.0461847	0.276136	1	1908	tags=31%, list=12%, signal=35%
GOBP_NEGATIVE_REGULATION_OF_CELLULAR_CATABOLIC_PROCESS	GOBP_NEGATIVE_REGULATION_OF_CELLULAR_CATABOLIC_PROCESS	215	0.284501	1.44524	0.0314961	0.276064	1	3024	tags=18%, list=20%, signal=22%
GOBP_NEGATIVE_REGULATION_OF_CYSTEINE_TYPE_ENDOPEPTIDASE_ACTIVITY	GOBP_NEGATIVE_REGULATION_OF_CYSTEINE_TYPE_ENDOPEPTIDASE_ACTIVITY	71	0.446987	1.44497	0.0606654	0.276178	1	3007	tags=35%, list=20%, signal=44%
GOBP_PROTEIN_KINASE_C_SIGNALING	GOBP_PROTEIN_KINASE_C_SIGNALING	28	0.538434	1.44496	0.0363289	0.275846	1	2137	tags=32%, list=14%, signal=37%
GOCC_EXTRINSIC_COMPONENT_OF_PLASMA_MEMBRANE	GOCC_EXTRINSIC_COMPONENT_OF_PLASMA_MEMBRANE	161	0.412943	1.44486	0.0134615	0.275633	1	2613	tags=30%, list=17%, signal=36%
GOBP_POSITIVE_REGULATION_OF_CHOLESTEROL_EFFLUX	GOBP_POSITIVE_REGULATION_OF_CHOLESTEROL_EFFLUX	20	0.574032	1.44453	0.0583658	0.275863	1	2836	tags=40%, list=18%, signal=49%
GOBP_LYMPHOCYTE_APOPTOTIC_PROCESS	GOBP_LYMPHOCYTE_APOPTOTIC_PROCESS	67	0.486566	1.4444	0.0689655	0.275743	1	2538	tags=28%, list=17%, signal=34%
GOBP_REGULATION_OF_VESICLE_MEDIATED_TRANSPORT	GOBP_REGULATION_OF_VESICLE_MEDIATED_TRANSPORT	469	0.396584	1.44405	0.0258964	0.275934	1	3634	tags=33%, list=24%, signal=42%
GOBP_ASTROCYTE_ACTIVATION	GOBP_ASTROCYTE_ACTIVATION	19	0.64202	1.44402	0.0570342	0.275639	1	3211	tags=63%, list=21%, signal=80%
GOBP_NEUROINFLAMMATORY_RESPONSE	GOBP_NEUROINFLAMMATORY_RESPONSE	33	0.658454	1.44402	0.0520231	0.275301	1	3211	tags=61%, list=21%, signal=76%
GOBP_INTERLEUKIN_8_PRODUCTION	GOBP_INTERLEUKIN_8_PRODUCTION	76	0.529241	1.44382	0.0605469	0.275277	1	2934	tags=38%, list=19%, signal=47%
GOBP_NEGATIVE_REGULATION_OF_ADENYLATE_CYCLASE_ACTIVITY	GOBP_NEGATIVE_REGULATION_OF_ADENYLATE_CYCLASE_ACTIVITY	18	0.613123	1.44366	0.0570866	0.275184	1	2341	tags=33%, list=15%, signal=39%
GOBP_VACUOLE_ORGANIZATION	GOBP_VACUOLE_ORGANIZATION	152	0.268445	1.44362	0.0873016	0.274909	1	4033	tags=20%, list=26%, signal=27%
GOBP_MYELOID_CELL_APOPTOTIC_PROCESS	GOBP_MYELOID_CELL_APOPTOTIC_PROCESS	25	0.491814	1.44336	0.0581614	0.27499	1	3017	tags=40%, list=20%, signal=50%
GOBP_NEGATIVE_REGULATION_OF_CD4_POSITIVE_ALPHA_BETA_T_CELL_ACTIVATION	GOBP_NEGATIVE_REGULATION_OF_CD4_POSITIVE_ALPHA_BETA_T_CELL_ACTIVATION	25	0.571705	1.4432	0.0939335	0.274899	1	2491	tags=36%, list=16%, signal=43%
GOMF_ASPARTIC_TYPE_PEPTIDASE_ACTIVITY	GOMF_ASPARTIC_TYPE_PEPTIDASE_ACTIVITY	19	0.60524	1.44305	0.076087	0.274826	1	3416	tags=47%, list=22%, signal=61%
GOBP_POSITIVE_REGULATION_OF_MAPK_CASCADE	GOBP_POSITIVE_REGULATION_OF_MAPK_CASCADE	457	0.42398	1.44302	0.0172745	0.274521	1	3152	tags=34%, list=21%, signal=41%
GOBP_REGULATION_OF_CELLULAR_PROTEIN_CATABOLIC_PROCESS	GOBP_REGULATION_OF_CELLULAR_PROTEIN_CATABOLIC_PROCESS	221	0.2752	1.44197	0.0426357	0.275955	1	3782	tags=22%, list=25%, signal=28%
GOBP_NEUROTRANSMITTER_REUPTAKE	GOBP_NEUROTRANSMITTER_REUPTAKE	30	0.565329	1.44079	0.0298805	0.277618	1	1460	tags=27%, list=10%, signal=29%
GOBP_LEUKOCYTE_APOPTOTIC_PROCESS	GOBP_LEUKOCYTE_APOPTOTIC_PROCESS	95	0.48538	1.44057	0.0693878	0.277611	1	3017	tags=36%, list=20%, signal=44%
GOCC_LUMENAL_SIDE_OF_MEMBRANE	GOCC_LUMENAL_SIDE_OF_MEMBRANE	27	0.534052	1.44037	0.0979592	0.277617	1	4993	tags=52%, list=33%, signal=77%
GOBP_REGULATION_OF_CLATHRIN_DEPENDENT_ENDOCYTOSIS	GOBP_REGULATION_OF_CLATHRIN_DEPENDENT_ENDOCYTOSIS	19	0.565071	1.44014	0.0988142	0.277698	1	3789	tags=42%, list=25%, signal=56%
GOBP_REGULATION_OF_CARDIAC_MUSCLE_CONTRACTION_BY_REGULATION_OF_THE_RELEASE_OF_SEQUESTERED_CALCIUM_ION	GOBP_REGULATION_OF_CARDIAC_MUSCLE_CONTRACTION_BY_REGULATION_OF_THE_RELEASE_OF_SEQUESTERED_CALCIUM_ION	19	0.693676	1.43995	0.0549898	0.277672	1	2010	tags=47%, list=13%, signal=54%
GOBP_REGULATION_OF_DNA_BINDING_TRANSCRIPTION_FACTOR_ACTIVITY	GOBP_REGULATION_OF_DNA_BINDING_TRANSCRIPTION_FACTOR_ACTIVITY	394	0.36737	1.43956	0.0283554	0.278002	1	2959	tags=25%, list=19%, signal=31%
GOBP_LIPID_TRANSLOCATION	GOBP_LIPID_TRANSLOCATION	44	0.485624	1.4392	0.0280561	0.278307	1	2836	tags=39%, list=18%, signal=47%
GOBP_REGULATION_OF_SPROUTING_ANGIOGENESIS	GOBP_REGULATION_OF_SPROUTING_ANGIOGENESIS	34	0.529355	1.4391	0.0583658	0.278148	1	3034	tags=35%, list=20%, signal=44%
GOBP_LEUKOCYTE_CHEMOTAXIS	GOBP_LEUKOCYTE_CHEMOTAXIS	187	0.515798	1.43885	0.0554493	0.278201	1	3152	tags=44%, list=21%, signal=55%
GOBP_IMMUNOGLOBULIN_PRODUCTION	GOBP_IMMUNOGLOBULIN_PRODUCTION	92	0.512624	1.43884	0.0809717	0.277886	1	1299	tags=22%, list=8%, signal=24%
GOBP_REGULATION_OF_TRIGLYCERIDE_BIOSYNTHETIC_PROCESS	GOBP_REGULATION_OF_TRIGLYCERIDE_BIOSYNTHETIC_PROCESS	16	0.594152	1.43869	0.0809129	0.277797	1	2629	tags=44%, list=17%, signal=53%
GOBP_T_CELL_CYTOKINE_PRODUCTION	GOBP_T_CELL_CYTOKINE_PRODUCTION	35	0.593126	1.43853	0.0793651	0.277732	1	3152	tags=46%, list=21%, signal=57%
GOBP_ENDOSOME_TO_LYSOSOME_TRANSPORT	GOBP_ENDOSOME_TO_LYSOSOME_TRANSPORT	47	0.345998	1.43805	0.088983	0.278196	1	4974	tags=36%, list=32%, signal=53%
GOBP_REGULATION_OF_LYMPHOCYTE_APOPTOTIC_PROCESS	GOBP_REGULATION_OF_LYMPHOCYTE_APOPTOTIC_PROCESS	50	0.500489	1.43789	0.0635246	0.278113	1	2538	tags=32%, list=17%, signal=38%
GOBP_PHOSPHATIDYLCHOLINE_METABOLIC_PROCESS	GOBP_PHOSPHATIDYLCHOLINE_METABOLIC_PROCESS	81	0.465751	1.43787	0.0392562	0.277799	1	4005	tags=47%, list=26%, signal=63%
GOBP_POSITIVE_REGULATION_OF_MRNA_CATABOLIC_PROCESS	GOBP_POSITIVE_REGULATION_OF_MRNA_CATABOLIC_PROCESS	50	0.340241	1.43719	0.110656	0.27856	1	4765	tags=34%, list=31%, signal=49%
GOMF_G_PROTEIN_COUPLED_CHEMOATTRACTANT_RECEPTOR_ACTIVITY	GOMF_G_PROTEIN_COUPLED_CHEMOATTRACTANT_RECEPTOR_ACTIVITY	22	0.718814	1.43648	0.0625	0.27949	1	2884	tags=73%, list=19%, signal=89%
GOBP_GLIAL_CELL_MIGRATION	GOBP_GLIAL_CELL_MIGRATION	44	0.519457	1.43545	0.0721443	0.280951	1	2524	tags=34%, list=16%, signal=41%
GOBP_NEGATIVE_REGULATION_OF_INTERLEUKIN_2_PRODUCTION	GOBP_NEGATIVE_REGULATION_OF_INTERLEUKIN_2_PRODUCTION	27	0.640512	1.43524	0.0870406	0.280957	1	3152	tags=67%, list=21%, signal=84%
GOBP_CARDIAC_SEPTUM_MORPHOGENESIS	GOBP_CARDIAC_SEPTUM_MORPHOGENESIS	60	0.535602	1.43515	0.062	0.280772	1	3511	tags=45%, list=23%, signal=58%
GOBP_CELLULAR_MONOVALENT_INORGANIC_CATION_HOMEOSTASIS	GOBP_CELLULAR_MONOVALENT_INORGANIC_CATION_HOMEOSTASIS	106	0.43546	1.43502	0.031185	0.280658	1	2479	tags=25%, list=16%, signal=30%
GOBP_CATECHOL_CONTAINING_COMPOUND_METABOLIC_PROCESS	GOBP_CATECHOL_CONTAINING_COMPOUND_METABOLIC_PROCESS	45	0.53007	1.43498	0.0295276	0.280394	1	2834	tags=38%, list=18%, signal=46%
GOBP_REGULATION_OF_NATURAL_KILLER_CELL_MEDIATED_IMMUNITY	GOBP_REGULATION_OF_NATURAL_KILLER_CELL_MEDIATED_IMMUNITY	37	0.667149	1.43494	0.0826923	0.280101	1	2989	tags=62%, list=19%, signal=77%
GOMF_INTRAMEMBRANE_LIPID_TRANSPORTER_ACTIVITY	GOMF_INTRAMEMBRANE_LIPID_TRANSPORTER_ACTIVITY	31	0.509868	1.43475	0.0596421	0.280056	1	2836	tags=42%, list=18%, signal=51%
GOBP_NEGATIVE_REGULATION_OF_CELL_ACTIVATION	GOBP_NEGATIVE_REGULATION_OF_CELL_ACTIVATION	176	0.504988	1.4344	0.0841487	0.280331	1	2829	tags=42%, list=18%, signal=51%
GOBP_RESPONSE_TO_AMYLOID_BETA	GOBP_RESPONSE_TO_AMYLOID_BETA	43	0.560276	1.43385	0.0669291	0.28092	1	3086	tags=42%, list=20%, signal=52%
GOBP_POSITIVE_REGULATION_OF_OSSIFICATION	GOBP_POSITIVE_REGULATION_OF_OSSIFICATION	45	0.54483	1.43355	0.0306748	0.281091	1	2020	tags=36%, list=13%, signal=41%
GOCC_CORTICAL_ACTIN_CYTOSKELETON	GOCC_CORTICAL_ACTIN_CYTOSKELETON	74	0.417649	1.43274	0.0381526	0.282124	1	3210	tags=34%, list=21%, signal=43%
GOBP_ERK1_AND_ERK2_CASCADE	GOBP_ERK1_AND_ERK2_CASCADE	264	0.442241	1.43267	0.026465	0.281904	1	3515	tags=42%, list=23%, signal=54%
GOBP_REGULATION_OF_RESPONSE_TO_BIOTIC_STIMULUS	GOBP_REGULATION_OF_RESPONSE_TO_BIOTIC_STIMULUS	371	0.416479	1.43251	0.0923379	0.281851	1	3426	tags=31%, list=22%, signal=39%
GOCC_MYOSIN_FILAMENT	GOCC_MYOSIN_FILAMENT	22	0.628409	1.43233	0.0471513	0.281823	1	3192	tags=50%, list=21%, signal=63%
GOCC_I_BAND	GOCC_I_BAND	128	0.508897	1.43202	0.0509804	0.282017	1	2962	tags=35%, list=19%, signal=43%
GOMF_HYDROLASE_ACTIVITY_HYDROLYZING_O_GLYCOSYL_COMPOUNDS	GOMF_HYDROLASE_ACTIVITY_HYDROLYZING_O_GLYCOSYL_COMPOUNDS	73	0.438876	1.43178	0.0591716	0.28211	1	4280	tags=41%, list=28%, signal=57%
GOBP_NEGATIVE_REGULATION_OF_LEUKOCYTE_CELL_CELL_ADHESION	GOBP_NEGATIVE_REGULATION_OF_LEUKOCYTE_CELL_CELL_ADHESION	113	0.508798	1.43177	0.086444	0.281807	1	2587	tags=36%, list=17%, signal=43%
GOCC_CELL_LEADING_EDGE	GOCC_CELL_LEADING_EDGE	384	0.351025	1.43131	0.0326296	0.282258	1	3352	tags=28%, list=22%, signal=35%
GOBP_NEGATIVE_REGULATION_OF_INTERLEUKIN_12_PRODUCTION	GOBP_NEGATIVE_REGULATION_OF_INTERLEUKIN_12_PRODUCTION	17	0.723869	1.43124	0.0776699	0.282021	1	3093	tags=76%, list=20%, signal=96%
GOBP_NEGATIVE_REGULATION_OF_NECROTIC_CELL_DEATH	GOBP_NEGATIVE_REGULATION_OF_NECROTIC_CELL_DEATH	16	0.480172	1.43085	0.104839	0.282296	1	2966	tags=31%, list=19%, signal=39%
GOBP_REGULATION_OF_PROTEIN_CATABOLIC_PROCESS	GOBP_REGULATION_OF_PROTEIN_CATABOLIC_PROCESS	345	0.277215	1.43036	0.0266667	0.282852	1	3961	tags=25%, list=26%, signal=33%
GOBP_REGULATION_OF_B_CELL_ACTIVATION	GOBP_REGULATION_OF_B_CELL_ACTIVATION	110	0.529861	1.43014	0.112474	0.282918	1	3375	tags=45%, list=22%, signal=58%
GOBP_NEGATIVE_REGULATION_OF_PROTEIN_KINASE_B_SIGNALING	GOBP_NEGATIVE_REGULATION_OF_PROTEIN_KINASE_B_SIGNALING	43	0.429105	1.43008	0.0703422	0.282685	1	4528	tags=37%, list=29%, signal=53%
GOBP_LEUKOCYTE_MIGRATION_INVOLVED_IN_INFLAMMATORY_RESPONSE	GOBP_LEUKOCYTE_MIGRATION_INVOLVED_IN_INFLAMMATORY_RESPONSE	18	0.670228	1.43007	0.0677291	0.28236	1	2303	tags=61%, list=15%, signal=72%
GOBP_REGULATION_OF_BODY_FLUID_LEVELS	GOBP_REGULATION_OF_BODY_FLUID_LEVELS	456	0.405341	1.43	0.0252427	0.282138	1	3546	tags=33%, list=23%, signal=41%
GOBP_REGULATION_OF_VASCULATURE_DEVELOPMENT	GOBP_REGULATION_OF_VASCULATURE_DEVELOPMENT	244	0.4698	1.42998	0.0550285	0.281825	1	3513	tags=42%, list=23%, signal=53%
GOCC_AUTOPHAGOSOME_MEMBRANE	GOCC_AUTOPHAGOSOME_MEMBRANE	34	0.401778	1.42958	0.0848861	0.282233	1	4457	tags=32%, list=29%, signal=45%
GOBP_BLOOD_VESSEL_ENDOTHELIAL_CELL_PROLIFERATION_INVOLVED_IN_SPROUTING_ANGIOGENESIS	GOBP_BLOOD_VESSEL_ENDOTHELIAL_CELL_PROLIFERATION_INVOLVED_IN_SPROUTING_ANGIOGENESIS	21	0.690251	1.42951	0.0782779	0.281983	1	2330	tags=52%, list=15%, signal=62%
GOBP_REGULATION_OF_MEMBRANE_LIPID_DISTRIBUTION	GOBP_REGULATION_OF_MEMBRANE_LIPID_DISTRIBUTION	50	0.450854	1.42942	0.0419162	0.281841	1	2836	tags=34%, list=18%, signal=42%
GOBP_HYALURONAN_METABOLIC_PROCESS	GOBP_HYALURONAN_METABOLIC_PROCESS	36	0.54825	1.42939	0.0500963	0.281558	1	3375	tags=44%, list=22%, signal=57%
GOBP_MODULATION_OF_PROCESS_OF_OTHER_ORGANISM_INVOLVED_IN_SYMBIOTIC_INTERACTION	GOBP_MODULATION_OF_PROCESS_OF_OTHER_ORGANISM_INVOLVED_IN_SYMBIOTIC_INTERACTION	87	0.344864	1.4292	0.0488281	0.281508	1	4337	tags=31%, list=28%, signal=43%
GOMF_MHC_PROTEIN_COMPLEX_BINDING	GOMF_MHC_PROTEIN_COMPLEX_BINDING	21	0.669443	1.429	0.0868687	0.281505	1	2263	tags=48%, list=15%, signal=56%
GOBP_NEURON_CELLULAR_HOMEOSTASIS	GOBP_NEURON_CELLULAR_HOMEOSTASIS	31	0.549879	1.42884	0.0537849	0.281427	1	2986	tags=29%, list=19%, signal=36%
GOBP_REGULATION_OF_LEUKOCYTE_CHEMOTAXIS	GOBP_REGULATION_OF_LEUKOCYTE_CHEMOTAXIS	100	0.50552	1.42678	0.0628684	0.284521	1	3346	tags=47%, list=22%, signal=60%
GOBP_AMYLOID_PRECURSOR_PROTEIN_CATABOLIC_PROCESS	GOBP_AMYLOID_PRECURSOR_PROTEIN_CATABOLIC_PROCESS	50	0.410282	1.42635	0.0856031	0.284939	1	3751	tags=34%, list=24%, signal=45%
GOBP_REGULATION_OF_NITRIC_OXIDE_SYNTHASE_ACTIVITY	GOBP_REGULATION_OF_NITRIC_OXIDE_SYNTHASE_ACTIVITY	45	0.473641	1.42624	0.054326	0.284762	1	2773	tags=31%, list=18%, signal=38%
GOBP_TUMOR_NECROSIS_FACTOR_MEDIATED_SIGNALING_PATHWAY	GOBP_TUMOR_NECROSIS_FACTOR_MEDIATED_SIGNALING_PATHWAY	153	0.395602	1.42618	0.100193	0.284515	1	3072	tags=27%, list=20%, signal=34%
GOBP_SKELETAL_MUSCLE_CONTRACTION	GOBP_SKELETAL_MUSCLE_CONTRACTION	41	0.550389	1.42614	0.045098	0.284273	1	3554	tags=46%, list=23%, signal=60%
GOBP_NEGATIVE_REGULATION_OF_MACROPHAGE_ACTIVATION	GOBP_NEGATIVE_REGULATION_OF_MACROPHAGE_ACTIVATION	15	0.67771	1.42595	0.0681818	0.28428	1	4237	tags=73%, list=28%, signal=101%
GOMF_EXOPEPTIDASE_ACTIVITY	GOMF_EXOPEPTIDASE_ACTIVITY	84	0.44424	1.42552	0.0319361	0.284647	1	2545	tags=27%, list=17%, signal=33%
GOCC_MYOSIN_COMPLEX	GOCC_MYOSIN_COMPLEX	54	0.494773	1.42517	0.0461847	0.284873	1	4024	tags=43%, list=26%, signal=58%
GOBP_RESPONSE_TO_PROTOZOAN	GOBP_RESPONSE_TO_PROTOZOAN	21	0.664056	1.42507	0.103239	0.284733	1	3502	tags=62%, list=23%, signal=80%
GOBP_PROCESS_UTILIZING_AUTOPHAGIC_MECHANISM	GOBP_PROCESS_UTILIZING_AUTOPHAGIC_MECHANISM	485	0.245061	1.42484	0.038	0.284828	1	5059	tags=30%, list=33%, signal=43%
GOBP_REGULATION_OF_VIRAL_INDUCED_CYTOPLASMIC_PATTERN_RECOGNITION_RECEPTOR_SIGNALING_PATHWAY	GOBP_REGULATION_OF_VIRAL_INDUCED_CYTOPLASMIC_PATTERN_RECOGNITION_RECEPTOR_SIGNALING_PATHWAY	17	0.459707	1.4248	0.119772	0.284574	1	2695	tags=24%, list=18%, signal=29%
GOBP_RESPONSE_TO_TRANSFORMING_GROWTH_FACTOR_BETA	GOBP_RESPONSE_TO_TRANSFORMING_GROWTH_FACTOR_BETA	234	0.402814	1.42478	0.0671785	0.284276	1	3541	tags=30%, list=23%, signal=38%
GOBP_NATURAL_KILLER_CELL_ACTIVATION_INVOLVED_IN_IMMUNE_RESPONSE	GOBP_NATURAL_KILLER_CELL_ACTIVATION_INVOLVED_IN_IMMUNE_RESPONSE	25	0.513622	1.42456	0.0764588	0.284338	1	2046	tags=20%, list=13%, signal=23%
GOBP_ENGULFMENT_OF_APOPTOTIC_CELL	GOBP_ENGULFMENT_OF_APOPTOTIC_CELL	16	0.583062	1.42403	0.0425101	0.284977	1	2836	tags=50%, list=18%, signal=61%
GOBP_REGULATION_OF_T_HELPER_1_TYPE_IMMUNE_RESPONSE	GOBP_REGULATION_OF_T_HELPER_1_TYPE_IMMUNE_RESPONSE	27	0.637231	1.42396	0.0769231	0.284756	1	3152	tags=63%, list=21%, signal=79%
GOBP_CORONARY_VASCULATURE_MORPHOGENESIS	GOBP_CORONARY_VASCULATURE_MORPHOGENESIS	15	0.589017	1.42368	0.063745	0.284884	1	1613	tags=27%, list=11%, signal=30%
GOBP_NEGATIVE_REGULATION_OF_GTPASE_ACTIVITY	GOBP_NEGATIVE_REGULATION_OF_GTPASE_ACTIVITY	42	0.42005	1.42343	0.0696721	0.28507	1	3355	tags=33%, list=22%, signal=43%
GOBP_ACTIVATION_OF_PROTEIN_KINASE_A_ACTIVITY	GOBP_ACTIVATION_OF_PROTEIN_KINASE_A_ACTIVITY	18	0.565007	1.42328	0.0873984	0.285004	1	4249	tags=50%, list=28%, signal=69%
GOBP_ANTIGEN_PROCESSING_AND_PRESENTATION_OF_ENDOGENOUS_PEPTIDE_ANTIGEN	GOBP_ANTIGEN_PROCESSING_AND_PRESENTATION_OF_ENDOGENOUS_PEPTIDE_ANTIGEN	16	0.586363	1.42301	0.0809717	0.285144	1	5424	tags=88%, list=35%, signal=135%
GOBP_POSITIVE_REGULATION_OF_INTERLEUKIN_4_PRODUCTION	GOBP_POSITIVE_REGULATION_OF_INTERLEUKIN_4_PRODUCTION	22	0.660004	1.42284	0.08577	0.285076	1	2248	tags=59%, list=15%, signal=69%
GOBP_MONOVALENT_INORGANIC_CATION_HOMEOSTASIS	GOBP_MONOVALENT_INORGANIC_CATION_HOMEOSTASIS	149	0.435414	1.42265	0.0220441	0.285082	1	2479	tags=26%, list=16%, signal=30%
GOBP_REGULATION_OF_ACTIN_FILAMENT_BASED_PROCESS	GOBP_REGULATION_OF_ACTIN_FILAMENT_BASED_PROCESS	351	0.390353	1.42263	0.0526316	0.284775	1	3546	tags=33%, list=23%, signal=42%
GOBP_POSITIVE_REGULATION_OF_LEUKOCYTE_CHEMOTAXIS	GOBP_POSITIVE_REGULATION_OF_LEUKOCYTE_CHEMOTAXIS	82	0.504254	1.42259	0.0687623	0.284523	1	3346	tags=45%, list=22%, signal=57%
GOMF_RNA_POLYMERASE_II_TRANSCRIPTION_FACTOR_BINDING	GOMF_RNA_POLYMERASE_II_TRANSCRIPTION_FACTOR_BINDING	51	0.414889	1.42256	0.0779727	0.284242	1	3149	tags=25%, list=21%, signal=32%
GOBP_REGULATION_OF_CATION_TRANSMEMBRANE_TRANSPORT	GOBP_REGULATION_OF_CATION_TRANSMEMBRANE_TRANSPORT	300	0.44657	1.42204	0.0212766	0.284843	1	3353	tags=36%, list=22%, signal=46%
GOBP_NEGATIVE_REGULATION_OF_INTERLEUKIN_10_PRODUCTION	GOBP_NEGATIVE_REGULATION_OF_INTERLEUKIN_10_PRODUCTION	18	0.662562	1.42179	0.0923379	0.284938	1	2125	tags=44%, list=14%, signal=52%
GOBP_POSITIVE_REGULATION_OF_AMYLOID_BETA_FORMATION	GOBP_POSITIVE_REGULATION_OF_AMYLOID_BETA_FORMATION	15	0.54311	1.42136	0.0919765	0.285343	1	3211	tags=40%, list=21%, signal=51%
GOBP_RESPONSE_TO_AMPHETAMINE	GOBP_RESPONSE_TO_AMPHETAMINE	28	0.543974	1.42126	0.0635838	0.285206	1	1792	tags=29%, list=12%, signal=32%
GOBP_NEGATIVE_REGULATION_OF_PHOSPHORUS_METABOLIC_PROCESS	GOBP_NEGATIVE_REGULATION_OF_PHOSPHORUS_METABOLIC_PROCESS	450	0.354253	1.42082	0.0194553	0.285567	1	3403	tags=29%, list=22%, signal=37%
GOBP_HYDROGEN_PEROXIDE_BIOSYNTHETIC_PROCESS	GOBP_HYDROGEN_PEROXIDE_BIOSYNTHETIC_PROCESS	15	0.681688	1.42067	0.0877551	0.285526	1	1661	tags=27%, list=11%, signal=30%
GOBP_NEGATIVE_REGULATION_OF_T_CELL_APOPTOTIC_PROCESS	GOBP_NEGATIVE_REGULATION_OF_T_CELL_APOPTOTIC_PROCESS	19	0.620894	1.42061	0.0696202	0.285289	1	2125	tags=42%, list=14%, signal=49%
GOBP_REGULATION_OF_PROTEIN_LOCALIZATION_TO_CELL_PERIPHERY	GOBP_REGULATION_OF_PROTEIN_LOCALIZATION_TO_CELL_PERIPHERY	112	0.366864	1.42052	0.0315582	0.285126	1	3836	tags=31%, list=25%, signal=41%
GOBP_REGULATION_OF_MONOCYTE_DIFFERENTIATION	GOBP_REGULATION_OF_MONOCYTE_DIFFERENTIATION	18	0.529933	1.42029	0.1139	0.285199	1	4798	tags=67%, list=31%, signal=97%
GOBP_AMMONIUM_ION_METABOLIC_PROCESS	GOBP_AMMONIUM_ION_METABOLIC_PROCESS	25	0.589941	1.41977	0.0494845	0.285751	1	2686	tags=44%, list=17%, signal=53%
GOMF_ANION_CATION_SYMPORTER_ACTIVITY	GOMF_ANION_CATION_SYMPORTER_ACTIVITY	22	0.563665	1.41973	0.0440882	0.285474	1	337	tags=18%, list=2%, signal=19%
GOMF_PHOSPHATIDYLINOSITOL_KINASE_ACTIVITY	GOMF_PHOSPHATIDYLINOSITOL_KINASE_ACTIVITY	15	0.526508	1.41943	0.118	0.285676	1	4230	tags=47%, list=28%, signal=64%
GOBP_POSITIVE_REGULATION_OF_B_CELL_ACTIVATION	GOBP_POSITIVE_REGULATION_OF_B_CELL_ACTIVATION	68	0.529348	1.4192	0.122	0.285738	1	2934	tags=34%, list=19%, signal=42%
GOBP_SEQUESTERING_OF_CALCIUM_ION	GOBP_SEQUESTERING_OF_CALCIUM_ION	106	0.50224	1.41918	0.0431373	0.285453	1	2683	tags=37%, list=17%, signal=44%
GOBP_PURINERGIC_NUCLEOTIDE_RECEPTOR_SIGNALING_PATHWAY	GOBP_PURINERGIC_NUCLEOTIDE_RECEPTOR_SIGNALING_PATHWAY	28	0.626308	1.41902	0.0529412	0.285395	1	3346	tags=64%, list=22%, signal=82%
GOBP_NEGATIVE_REGULATION_OF_NUCLEOTIDE_METABOLIC_PROCESS	GOBP_NEGATIVE_REGULATION_OF_NUCLEOTIDE_METABOLIC_PROCESS	20	0.530971	1.41902	0.0615385	0.285072	1	2017	tags=25%, list=13%, signal=29%
GOBP_NEGATIVE_REGULATION_OF_RESPONSE_TO_EXTERNAL_STIMULUS	GOBP_NEGATIVE_REGULATION_OF_RESPONSE_TO_EXTERNAL_STIMULUS	315	0.450384	1.41889	0.0392157	0.284959	1	3416	tags=40%, list=22%, signal=50%
GOCC_LAMELLIPODIUM	GOCC_LAMELLIPODIUM	184	0.363794	1.41731	0.0931559	0.287465	1	3655	tags=30%, list=24%, signal=39%
GOBP_REGULATION_OF_NEURON_MIGRATION	GOBP_REGULATION_OF_NEURON_MIGRATION	33	0.52773	1.41561	0.0756972	0.289927	1	814	tags=18%, list=5%, signal=19%
GOMF_CYTOKINE_RECEPTOR_BINDING	GOMF_CYTOKINE_RECEPTOR_BINDING	228	0.481538	1.4151	0.0403846	0.290463	1	2712	tags=34%, list=18%, signal=41%
GOBP_REGULATION_OF_ORGAN_GROWTH	GOBP_REGULATION_OF_ORGAN_GROWTH	83	0.460852	1.41464	0.0588235	0.290897	1	3511	tags=36%, list=23%, signal=47%
GOCC_ROUGH_ENDOPLASMIC_RETICULUM	GOCC_ROUGH_ENDOPLASMIC_RETICULUM	67	0.412143	1.41438	0.0478088	0.291026	1	1100	tags=13%, list=7%, signal=14%
GOBP_REGULATION_OF_GRANULOCYTE_CHEMOTAXIS	GOBP_REGULATION_OF_GRANULOCYTE_CHEMOTAXIS	44	0.524922	1.41416	0.0657371	0.291053	1	3341	tags=48%, list=22%, signal=61%
GOBP_MEMBRANE_DEPOLARIZATION	GOBP_MEMBRANE_DEPOLARIZATION	81	0.499742	1.41411	0.0405405	0.290805	1	2603	tags=33%, list=17%, signal=40%
GOMF_ACTIN_BINDING	GOMF_ACTIN_BINDING	405	0.389593	1.41398	0.0433071	0.290704	1	3791	tags=37%, list=25%, signal=47%
GOBP_POSITIVE_REGULATION_OF_STEROL_TRANSPORT	GOBP_POSITIVE_REGULATION_OF_STEROL_TRANSPORT	29	0.508409	1.4139	0.0621359	0.290487	1	2836	tags=34%, list=18%, signal=42%
GOBP_REGULATION_OF_MACROAUTOPHAGY	GOBP_REGULATION_OF_MACROAUTOPHAGY	149	0.264088	1.41378	0.0963391	0.290356	1	3575	tags=19%, list=23%, signal=24%
GOBP_REGULATION_OF_NEUTROPHIL_CHEMOTAXIS	GOBP_REGULATION_OF_NEUTROPHIL_CHEMOTAXIS	28	0.579471	1.41352	0.0875486	0.290484	1	3341	tags=54%, list=22%, signal=68%
GOMF_NON_MEMBRANE_SPANNING_PROTEIN_TYROSINE_KINASE_ACTIVITY	GOMF_NON_MEMBRANE_SPANNING_PROTEIN_TYROSINE_KINASE_ACTIVITY	45	0.480671	1.41349	0.0825147	0.290217	1	2365	tags=36%, list=15%, signal=42%
GOMF_PHOSPHORUS_OXYGEN_LYASE_ACTIVITY	GOMF_PHOSPHORUS_OXYGEN_LYASE_ACTIVITY	19	0.581191	1.41224	0.0847784	0.291948	1	3818	tags=58%, list=25%, signal=77%
GOBP_REGULATION_OF_CELLULAR_RESPONSE_TO_GROWTH_FACTOR_STIMULUS	GOBP_REGULATION_OF_CELLULAR_RESPONSE_TO_GROWTH_FACTOR_STIMULUS	250	0.43621	1.41221	0.0483271	0.29167	1	3481	tags=32%, list=23%, signal=40%
GOMF_TUMOR_NECROSIS_FACTOR_RECEPTOR_BINDING	GOMF_TUMOR_NECROSIS_FACTOR_RECEPTOR_BINDING	29	0.58206	1.41193	0.139489	0.291815	1	1686	tags=41%, list=11%, signal=46%
GOBP_MUSCLE_CELL_APOPTOTIC_PROCESS	GOBP_MUSCLE_CELL_APOPTOTIC_PROCESS	61	0.454129	1.41185	0.0526316	0.291626	1	3512	tags=34%, list=23%, signal=44%
GOCC_DYNEIN_COMPLEX	GOCC_DYNEIN_COMPLEX	42	0.6346	1.41178	0.128898	0.291436	1	2131	tags=36%, list=14%, signal=41%
GOBP_POSITIVE_REGULATION_OF_CALCIUM_ION_TRANSPORT	GOBP_POSITIVE_REGULATION_OF_CALCIUM_ION_TRANSPORT	105	0.470773	1.41173	0.0230326	0.291192	1	3234	tags=39%, list=21%, signal=49%
GOBP_POSITIVE_REGULATION_OF_MACROPHAGE_DERIVED_FOAM_CELL_DIFFERENTIATION	GOBP_POSITIVE_REGULATION_OF_MACROPHAGE_DERIVED_FOAM_CELL_DIFFERENTIATION	18	0.701351	1.41135	0.0680934	0.291474	1	3093	tags=72%, list=20%, signal=90%
GOCC_RUFFLE_MEMBRANE	GOCC_RUFFLE_MEMBRANE	89	0.38845	1.41099	0.0919765	0.29177	1	4589	tags=46%, list=30%, signal=65%
GOBP_POSITIVE_REGULATION_OF_MUSCLE_HYPERTROPHY	GOBP_POSITIVE_REGULATION_OF_MUSCLE_HYPERTROPHY	25	0.523656	1.41042	0.0803213	0.292519	1	3174	tags=36%, list=21%, signal=45%
GOMF_SULFUR_COMPOUND_BINDING	GOMF_SULFUR_COMPOUND_BINDING	222	0.46019	1.40988	0.0392523	0.293138	1	2624	tags=30%, list=17%, signal=35%
GOBP_ENDOCARDIAL_CUSHION_FORMATION	GOBP_ENDOCARDIAL_CUSHION_FORMATION	24	0.589553	1.40987	0.0682261	0.292832	1	2790	tags=33%, list=18%, signal=41%
GOBP_REGULATION_OF_SYSTEMIC_ARTERIAL_BLOOD_PRESSURE_BY_HORMONE	GOBP_REGULATION_OF_SYSTEMIC_ARTERIAL_BLOOD_PRESSURE_BY_HORMONE	33	0.610414	1.40983	0.0352251	0.292571	1	580	tags=24%, list=4%, signal=25%
GOCC_PLASMA_MEMBRANE_SIGNALING_RECEPTOR_COMPLEX	GOCC_PLASMA_MEMBRANE_SIGNALING_RECEPTOR_COMPLEX	174	0.45322	1.40968	0.0470588	0.29251	1	2647	tags=32%, list=17%, signal=38%
GOBP_POSITIVE_REGULATION_OF_PRI_MIRNA_TRANSCRIPTION_BY_RNA_POLYMERASE_II	GOBP_POSITIVE_REGULATION_OF_PRI_MIRNA_TRANSCRIPTION_BY_RNA_POLYMERASE_II	39	0.52994	1.40928	0.0787993	0.292893	1	2790	tags=44%, list=18%, signal=53%
GOBP_REGULATION_OF_TOLERANCE_INDUCTION	GOBP_REGULATION_OF_TOLERANCE_INDUCTION	17	0.670303	1.4092	0.106178	0.292701	1	4179	tags=76%, list=27%, signal=105%
GOBP_GLUTATHIONE_DERIVATIVE_METABOLIC_PROCESS	GOBP_GLUTATHIONE_DERIVATIVE_METABOLIC_PROCESS	17	0.592593	1.40912	0.112676	0.292523	1	4340	tags=53%, list=28%, signal=74%
GOBP_POSITIVE_REGULATION_OF_CELL_MATRIX_ADHESION	GOBP_POSITIVE_REGULATION_OF_CELL_MATRIX_ADHESION	53	0.472137	1.40897	0.0615079	0.292464	1	1548	tags=21%, list=10%, signal=23%
GOBP_POSITIVE_REGULATION_OF_NEURON_PROJECTION_DEVELOPMENT	GOBP_POSITIVE_REGULATION_OF_NEURON_PROJECTION_DEVELOPMENT	136	0.427218	1.40862	0.0421687	0.292775	1	3207	tags=30%, list=21%, signal=38%
GOMF_NADPLUS_NUCLEOSIDASE_ACTIVITY	GOMF_NADPLUS_NUCLEOSIDASE_ACTIVITY	16	0.643536	1.40826	0.0796117	0.292997	1	2941	tags=56%, list=19%, signal=70%
GOBP_POSITIVE_REGULATION_OF_ANION_TRANSMEMBRANE_TRANSPORT	GOBP_POSITIVE_REGULATION_OF_ANION_TRANSMEMBRANE_TRANSPORT	54	0.446584	1.40824	0.0675944	0.292723	1	3144	tags=35%, list=20%, signal=44%
GOMF_EXOGENOUS_PROTEIN_BINDING	GOMF_EXOGENOUS_PROTEIN_BINDING	69	0.476462	1.40804	0.0592734	0.292774	1	3575	tags=41%, list=23%, signal=53%
GOBP_PHOSPHOLIPID_DEPHOSPHORYLATION	GOBP_PHOSPHOLIPID_DEPHOSPHORYLATION	30	0.393942	1.40788	0.0851485	0.292752	1	4627	tags=53%, list=30%, signal=76%
GOBP_DEFINITIVE_HEMOPOIESIS	GOBP_DEFINITIVE_HEMOPOIESIS	18	0.598939	1.40743	0.114943	0.293215	1	3013	tags=44%, list=20%, signal=55%
GOBP_MATING	GOBP_MATING	38	0.55352	1.40709	0.0382294	0.293514	1	1256	tags=26%, list=8%, signal=29%
GOBP_REGULATION_OF_SYSTEMIC_ARTERIAL_BLOOD_PRESSURE_BY_CIRCULATORY_RENIN_ANGIOTENSIN	GOBP_REGULATION_OF_SYSTEMIC_ARTERIAL_BLOOD_PRESSURE_BY_CIRCULATORY_RENIN_ANGIOTENSIN	16	0.699089	1.4068	0.0729367	0.29368	1	580	tags=38%, list=4%, signal=39%
GOBP_SOMATIC_RECOMBINATION_OF_IMMUNOGLOBULIN_GENE_SEGMENTS	GOBP_SOMATIC_RECOMBINATION_OF_IMMUNOGLOBULIN_GENE_SEGMENTS	46	0.474282	1.4066	0.12426	0.293699	1	2032	tags=22%, list=13%, signal=25%
GOBP_PIGMENT_CELL_DIFFERENTIATION	GOBP_PIGMENT_CELL_DIFFERENTIATION	30	0.524543	1.4066	0.0557692	0.293383	1	1990	tags=33%, list=13%, signal=38%
GOBP_NEGATIVE_REGULATION_OF_T_CELL_PROLIFERATION	GOBP_NEGATIVE_REGULATION_OF_T_CELL_PROLIFERATION	57	0.530347	1.40632	0.0994152	0.293556	1	2560	tags=39%, list=17%, signal=46%
GOBP_RESPIRATORY_GASEOUS_EXCHANGE_BY_RESPIRATORY_SYSTEM	GOBP_RESPIRATORY_GASEOUS_EXCHANGE_BY_RESPIRATORY_SYSTEM	60	0.494413	1.40625	0.0470348	0.29338	1	2621	tags=30%, list=17%, signal=36%
GOBP_EXPORT_ACROSS_PLASMA_MEMBRANE	GOBP_EXPORT_ACROSS_PLASMA_MEMBRANE	52	0.535942	1.40617	0.0488798	0.293223	1	1802	tags=33%, list=12%, signal=37%
GOBP_POSITIVE_REGULATION_OF_MYELOID_CELL_DIFFERENTIATION	GOBP_POSITIVE_REGULATION_OF_MYELOID_CELL_DIFFERENTIATION	88	0.43699	1.40584	0.059387	0.29352	1	3517	tags=39%, list=23%, signal=50%
GOBP_POSITIVE_REGULATION_OF_NITRIC_OXIDE_SYNTHASE_BIOSYNTHETIC_PROCESS	GOBP_POSITIVE_REGULATION_OF_NITRIC_OXIDE_SYNTHASE_BIOSYNTHETIC_PROCESS	15	0.662909	1.40563	0.0817121	0.293559	1	3211	tags=60%, list=21%, signal=76%
GOCC_PSEUDOPODIUM	GOCC_PSEUDOPODIUM	17	0.53556	1.40475	0.117172	0.294811	1	1247	tags=18%, list=8%, signal=19%
GOCC_ACTIN_CYTOSKELETON	GOCC_ACTIN_CYTOSKELETON	458	0.371243	1.40439	0.0570866	0.295113	1	3787	tags=32%, list=25%, signal=42%
GOBP_REGULATION_OF_MYELOID_CELL_APOPTOTIC_PROCESS	GOBP_REGULATION_OF_MYELOID_CELL_APOPTOTIC_PROCESS	21	0.482107	1.40437	0.0715667	0.294828	1	3017	tags=43%, list=20%, signal=53%
GOBP_DENDRITIC_CELL_CHEMOTAXIS	GOBP_DENDRITIC_CELL_CHEMOTAXIS	22	0.692337	1.40374	0.0815109	0.2956	1	3346	tags=59%, list=22%, signal=75%
GOBP_POSITIVE_REGULATION_OF_ENDOTHELIAL_CELL_APOPTOTIC_PROCESS	GOBP_POSITIVE_REGULATION_OF_ENDOTHELIAL_CELL_APOPTOTIC_PROCESS	15	0.655263	1.40361	0.0905512	0.295542	1	1915	tags=40%, list=12%, signal=46%
GOBP_BONE_RESORPTION	GOBP_BONE_RESORPTION	60	0.489219	1.40355	0.0610687	0.295318	1	3130	tags=43%, list=20%, signal=54%
GOBP_POSITIVE_REGULATION_OF_OXIDOREDUCTASE_ACTIVITY	GOBP_POSITIVE_REGULATION_OF_OXIDOREDUCTASE_ACTIVITY	52	0.448826	1.40305	0.0413386	0.295879	1	3211	tags=29%, list=21%, signal=36%
GOBP_LONG_TERM_SYNAPTIC_DEPRESSION	GOBP_LONG_TERM_SYNAPTIC_DEPRESSION	28	0.563987	1.40295	0.0788955	0.295734	1	3462	tags=50%, list=23%, signal=64%
GOBP_ANGIOGENESIS_INVOLVED_IN_WOUND_HEALING	GOBP_ANGIOGENESIS_INVOLVED_IN_WOUND_HEALING	24	0.542869	1.40283	0.0930233	0.295609	1	2453	tags=29%, list=16%, signal=35%
GOBP_REGULATION_OF_ANTIGEN_PROCESSING_AND_PRESENTATION	GOBP_REGULATION_OF_ANTIGEN_PROCESSING_AND_PRESENTATION	20	0.690638	1.40279	0.104082	0.295387	1	3462	tags=65%, list=23%, signal=84%
GOBP_REGULATION_OF_MYELOID_LEUKOCYTE_DIFFERENTIATION	GOBP_REGULATION_OF_MYELOID_LEUKOCYTE_DIFFERENTIATION	105	0.464701	1.4025	0.0647059	0.295543	1	3909	tags=47%, list=25%, signal=62%
GOBP_REGULATION_OF_TRANSPORTER_ACTIVITY	GOBP_REGULATION_OF_TRANSPORTER_ACTIVITY	244	0.449219	1.40238	0.0233463	0.295442	1	2063	tags=25%, list=13%, signal=28%
GOBP_SKELETAL_MUSCLE_ADAPTATION	GOBP_SKELETAL_MUSCLE_ADAPTATION	23	0.578032	1.40227	0.05625	0.295327	1	1457	tags=26%, list=9%, signal=29%
GOBP_REGULATION_OF_CALCIUM_ION_TRANSMEMBRANE_TRANSPORTER_ACTIVITY	GOBP_REGULATION_OF_CALCIUM_ION_TRANSMEMBRANE_TRANSPORTER_ACTIVITY	71	0.51349	1.4021	0.0377734	0.295282	1	2278	tags=32%, list=15%, signal=38%
GOMF_PHOSPHOLIPASE_C_ACTIVITY	GOMF_PHOSPHOLIPASE_C_ACTIVITY	27	0.55369	1.40207	0.0588235	0.295008	1	3022	tags=56%, list=20%, signal=69%
GOBP_ACTIN_CYTOSKELETON_REORGANIZATION	GOBP_ACTIN_CYTOSKELETON_REORGANIZATION	100	0.406104	1.40194	0.0742115	0.294932	1	3135	tags=30%, list=20%, signal=37%
GOMF_TROPOMYOSIN_BINDING	GOMF_TROPOMYOSIN_BINDING	15	0.603069	1.40188	0.10978	0.294731	1	2818	tags=47%, list=18%, signal=57%
GOBP_PHAGOCYTOSIS_RECOGNITION	GOBP_PHAGOCYTOSIS_RECOGNITION	21	0.633739	1.40181	0.0633397	0.294537	1	1218	tags=38%, list=8%, signal=41%
GOBP_REGULATION_OF_CHEMOTAXIS	GOBP_REGULATION_OF_CHEMOTAXIS	194	0.460963	1.40167	0.0558767	0.294494	1	3403	tags=42%, list=22%, signal=53%
GOBP_AXONAL_FASCICULATION	GOBP_AXONAL_FASCICULATION	19	0.604501	1.40114	0.0715667	0.295038	1	2524	tags=47%, list=16%, signal=57%
GOBP_ORGANOPHOSPHATE_ESTER_TRANSPORT	GOBP_ORGANOPHOSPHATE_ESTER_TRANSPORT	118	0.386918	1.40093	0.0416667	0.295153	1	2836	tags=28%, list=18%, signal=34%
GOBP_REGULATION_OF_LYMPHOCYTE_MIGRATION	GOBP_REGULATION_OF_LYMPHOCYTE_MIGRATION	51	0.529688	1.40073	0.114286	0.295203	1	3234	tags=43%, list=21%, signal=54%
GOBP_REGULATION_OF_RECEPTOR_RECYCLING	GOBP_REGULATION_OF_RECEPTOR_RECYCLING	21	0.506908	1.4007	0.0968379	0.294933	1	827	tags=14%, list=5%, signal=15%
GOBP_INTRACELLULAR_RECEPTOR_SIGNALING_PATHWAY	GOBP_INTRACELLULAR_RECEPTOR_SIGNALING_PATHWAY	242	0.350342	1.40018	0.0530452	0.295466	1	3149	tags=23%, list=21%, signal=28%
GOBP_NEGATIVE_REGULATION_OF_SYNAPTIC_TRANSMISSION	GOBP_NEGATIVE_REGULATION_OF_SYNAPTIC_TRANSMISSION	60	0.524345	1.39951	0.0545809	0.296349	1	3789	tags=43%, list=25%, signal=57%
GOBP_T_CELL_HOMEOSTASIS	GOBP_T_CELL_HOMEOSTASIS	35	0.526344	1.39921	0.11609	0.296506	1	2317	tags=34%, list=15%, signal=40%
GOMF_TUMOR_NECROSIS_FACTOR_RECEPTOR_SUPERFAMILY_BINDING	GOMF_TUMOR_NECROSIS_FACTOR_RECEPTOR_SUPERFAMILY_BINDING	45	0.500836	1.39847	0.110887	0.297438	1	2566	tags=33%, list=17%, signal=40%
GOBP_NEGATIVE_REGULATION_OF_AMYLOID_PRECURSOR_PROTEIN_CATABOLIC_PROCESS	GOBP_NEGATIVE_REGULATION_OF_AMYLOID_PRECURSOR_PROTEIN_CATABOLIC_PROCESS	20	0.527436	1.39845	0.102857	0.297158	1	3751	tags=45%, list=24%, signal=59%
GOBP_NEGATIVE_REGULATION_OF_LEUKOCYTE_MIGRATION	GOBP_NEGATIVE_REGULATION_OF_LEUKOCYTE_MIGRATION	33	0.607875	1.39844	0.0729783	0.296857	1	2964	tags=58%, list=19%, signal=71%
GOBP_RECEPTOR_SIGNALING_PATHWAY_VIA_STAT	GOBP_RECEPTOR_SIGNALING_PATHWAY_VIA_STAT	150	0.427293	1.39839	0.047259	0.29663	1	2401	tags=25%, list=16%, signal=29%
GOBP_NEGATIVE_REGULATION_OF_SMOOTH_MUSCLE_CELL_PROLIFERATION	GOBP_NEGATIVE_REGULATION_OF_SMOOTH_MUSCLE_CELL_PROLIFERATION	41	0.578507	1.39831	0.0796117	0.296486	1	4307	tags=66%, list=28%, signal=91%
GOBP_WOUND_HEALING	GOBP_WOUND_HEALING	479	0.400368	1.39822	0.0552381	0.296355	1	3789	tags=34%, list=25%, signal=44%
GOBP_MELANOCYTE_DIFFERENTIATION	GOBP_MELANOCYTE_DIFFERENTIATION	22	0.586165	1.3982	0.0575816	0.296084	1	1600	tags=41%, list=10%, signal=46%
GOBP_NEGATIVE_REGULATION_OF_INTERLEUKIN_8_PRODUCTION	GOBP_NEGATIVE_REGULATION_OF_INTERLEUKIN_8_PRODUCTION	16	0.618476	1.39797	0.0965795	0.296173	1	3327	tags=56%, list=22%, signal=72%
GOBP_VASCULAR_TRANSPORT	GOBP_VASCULAR_TRANSPORT	87	0.48587	1.39795	0.045098	0.295902	1	2120	tags=28%, list=14%, signal=32%
GOMF_ANDROGEN_RECEPTOR_BINDING	GOMF_ANDROGEN_RECEPTOR_BINDING	28	0.437952	1.39759	0.123791	0.296182	1	494	tags=7%, list=3%, signal=7%
GOBP_REGULATION_OF_TYPE_2_IMMUNE_RESPONSE	GOBP_REGULATION_OF_TYPE_2_IMMUNE_RESPONSE	29	0.589989	1.39743	0.107004	0.296136	1	2232	tags=38%, list=15%, signal=44%
GOBP_NEGATIVE_REGULATION_OF_TRANSMEMBRANE_RECEPTOR_PROTEIN_SERINE_THREONINE_KINASE_SIGNALING_PATHWAY	GOBP_NEGATIVE_REGULATION_OF_TRANSMEMBRANE_RECEPTOR_PROTEIN_SERINE_THREONINE_KINASE_SIGNALING_PATHWAY	115	0.435976	1.3971	0.0599251	0.296423	1	2254	tags=20%, list=15%, signal=23%
GOBP_RESPONSE_TO_HYPEROXIA	GOBP_RESPONSE_TO_HYPEROXIA	20	0.532394	1.39675	0.0825147	0.296739	1	1966	tags=30%, list=13%, signal=34%
GOBP_NITRIC_OXIDE_SYNTHASE_BIOSYNTHETIC_PROCESS	GOBP_NITRIC_OXIDE_SYNTHASE_BIOSYNTHETIC_PROCESS	18	0.631139	1.39653	0.0952381	0.296818	1	3211	tags=50%, list=21%, signal=63%
GOBP_REACTIVE_NITROGEN_SPECIES_METABOLIC_PROCESS	GOBP_REACTIVE_NITROGEN_SPECIES_METABOLIC_PROCESS	68	0.484783	1.39648	0.0722656	0.296609	1	3604	tags=44%, list=23%, signal=57%
GOMF_HYDROLASE_ACTIVITY_ACTING_ON_GLYCOSYL_BONDS	GOMF_HYDROLASE_ACTIVITY_ACTING_ON_GLYCOSYL_BONDS	109	0.397115	1.39633	0.0514286	0.296544	1	4453	tags=43%, list=29%, signal=60%
GOBP_POSITIVE_REGULATION_OF_PROTEASOMAL_UBIQUITIN_DEPENDENT_PROTEIN_CATABOLIC_PROCESS	GOBP_POSITIVE_REGULATION_OF_PROTEASOMAL_UBIQUITIN_DEPENDENT_PROTEIN_CATABOLIC_PROCESS	78	0.320719	1.39601	0.0803922	0.296757	1	1884	tags=14%, list=12%, signal=16%
GOBP_PROTEIN_TETRAMERIZATION	GOBP_PROTEIN_TETRAMERIZATION	80	0.402005	1.39584	0.045098	0.296756	1	1888	tags=18%, list=12%, signal=20%
GOBP_NEGATIVE_REGULATION_OF_INTERLEUKIN_1_PRODUCTION	GOBP_NEGATIVE_REGULATION_OF_INTERLEUKIN_1_PRODUCTION	30	0.614548	1.39554	0.0750988	0.296946	1	3785	tags=63%, list=25%, signal=84%
GOBP_ATRIAL_CARDIAC_MUSCLE_CELL_TO_AV_NODE_CELL_SIGNALING	GOBP_ATRIAL_CARDIAC_MUSCLE_CELL_TO_AV_NODE_CELL_SIGNALING	17	0.66824	1.39552	0.0534653	0.296675	1	2563	tags=47%, list=17%, signal=56%
GOBP_TYPE_2_IMMUNE_RESPONSE	GOBP_TYPE_2_IMMUNE_RESPONSE	35	0.574402	1.39544	0.104651	0.296517	1	3152	tags=43%, list=21%, signal=54%
GOBP_RESPONSE_TO_ETHANOL	GOBP_RESPONSE_TO_ETHANOL	121	0.44213	1.39543	0.0324544	0.296248	1	3027	tags=31%, list=20%, signal=39%
GOBP_EMBRYONIC_HEART_TUBE_MORPHOGENESIS	GOBP_EMBRYONIC_HEART_TUBE_MORPHOGENESIS	65	0.415613	1.39537	0.0440882	0.296048	1	2254	tags=22%, list=15%, signal=25%
GOMF_CYCLASE_ACTIVITY	GOMF_CYCLASE_ACTIVITY	17	0.585081	1.3951	0.102913	0.296209	1	3818	tags=59%, list=25%, signal=78%
GOBP_MACROPHAGE_CYTOKINE_PRODUCTION	GOBP_MACROPHAGE_CYTOKINE_PRODUCTION	15	0.597021	1.39479	0.11575	0.296407	1	3375	tags=47%, list=22%, signal=60%
GOBP_PHOSPHATIDYLINOSITOL_PHOSPHORYLATION	GOBP_PHOSPHATIDYLINOSITOL_PHOSPHORYLATION	49	0.389482	1.39464	0.0813492	0.296364	1	4230	tags=37%, list=28%, signal=51%
GOBP_NEGATIVE_REGULATION_OF_CELLULAR_RESPONSE_TO_GROWTH_FACTOR_STIMULUS	GOBP_NEGATIVE_REGULATION_OF_CELLULAR_RESPONSE_TO_GROWTH_FACTOR_STIMULUS	87	0.480773	1.39457	0.0545113	0.296176	1	3396	tags=36%, list=22%, signal=45%
GOCC_ANCHORED_COMPONENT_OF_EXTERNAL_SIDE_OF_PLASMA_MEMBRANE	GOCC_ANCHORED_COMPONENT_OF_EXTERNAL_SIDE_OF_PLASMA_MEMBRANE	16	0.653685	1.39455	0.0664062	0.295922	1	3869	tags=75%, list=25%, signal=100%
GOCC_TRANS_GOLGI_NETWORK	GOCC_TRANS_GOLGI_NETWORK	212	0.303138	1.39442	0.0536779	0.29582	1	4851	tags=34%, list=32%, signal=50%
GOBP_BROWN_FAT_CELL_DIFFERENTIATION	GOBP_BROWN_FAT_CELL_DIFFERENTIATION	44	0.510273	1.39433	0.0752033	0.295683	1	2439	tags=27%, list=16%, signal=32%
GOBP_REGULATION_OF_ERYTHROCYTE_DIFFERENTIATION	GOBP_REGULATION_OF_ERYTHROCYTE_DIFFERENTIATION	41	0.384432	1.39431	0.118868	0.295424	1	2358	tags=20%, list=15%, signal=23%
GOCC_GLYCOPROTEIN_COMPLEX	GOCC_GLYCOPROTEIN_COMPLEX	19	0.62406	1.3943	0.0914397	0.295137	1	3344	tags=58%, list=22%, signal=74%
GOBP_T_HELPER_2_CELL_DIFFERENTIATION	GOBP_T_HELPER_2_CELL_DIFFERENTIATION	15	0.601119	1.39429	0.106061	0.294845	1	2232	tags=40%, list=15%, signal=47%
GOCC_PROTEIN_LIPID_COMPLEX	GOCC_PROTEIN_LIPID_COMPLEX	34	0.533105	1.39427	0.0571992	0.294572	1	2976	tags=41%, list=19%, signal=51%
GOBP_REGULATION_OF_BLOOD_PRESSURE	GOBP_REGULATION_OF_BLOOD_PRESSURE	163	0.470546	1.39417	0.0433962	0.294425	1	2129	tags=28%, list=14%, signal=32%
GOMF_PEPTIDE_RECEPTOR_ACTIVITY	GOMF_PEPTIDE_RECEPTOR_ACTIVITY	139	0.481246	1.39405	0.0202429	0.294335	1	2129	tags=27%, list=14%, signal=31%
GOBP_GOLGI_TO_ENDOSOME_TRANSPORT	GOBP_GOLGI_TO_ENDOSOME_TRANSPORT	15	0.421631	1.39394	0.123482	0.294212	1	5789	tags=60%, list=38%, signal=96%
GOBP_REGULATION_OF_ACTIN_FILAMENT_LENGTH	GOBP_REGULATION_OF_ACTIN_FILAMENT_LENGTH	160	0.386661	1.39391	0.0707457	0.293955	1	3377	tags=31%, list=22%, signal=40%
GOMF_DOUBLE_STRANDED_RNA_BINDING	GOMF_DOUBLE_STRANDED_RNA_BINDING	70	0.360513	1.39382	0.131148	0.293811	1	3348	tags=24%, list=22%, signal=31%
GOBP_PURINE_NUCLEOSIDE_METABOLIC_PROCESS	GOBP_PURINE_NUCLEOSIDE_METABOLIC_PROCESS	54	0.365974	1.39377	0.064	0.293596	1	2391	tags=20%, list=16%, signal=24%
GOBP_VASCULOGENESIS	GOBP_VASCULOGENESIS	74	0.482316	1.39362	0.0935673	0.293539	1	3851	tags=43%, list=25%, signal=57%
GOBP_REGULATION_OF_PROTEIN_CONTAINING_COMPLEX_DISASSEMBLY	GOBP_REGULATION_OF_PROTEIN_CONTAINING_COMPLEX_DISASSEMBLY	103	0.380846	1.39361	0.0810811	0.293263	1	3682	tags=34%, list=24%, signal=44%
GOBP_MAINTENANCE_OF_LOCATION_IN_CELL	GOBP_MAINTENANCE_OF_LOCATION_IN_CELL	190	0.410313	1.39311	0.0275049	0.293728	1	3731	tags=34%, list=24%, signal=45%
GOBP_REGULATION_OF_CELLULAR_RESPONSE_TO_INSULIN_STIMULUS	GOBP_REGULATION_OF_CELLULAR_RESPONSE_TO_INSULIN_STIMULUS	57	0.383332	1.39291	0.0538033	0.293778	1	3140	tags=28%, list=20%, signal=35%
GOBP_RESPONSE_TO_TUMOR_CELL	GOBP_RESPONSE_TO_TUMOR_CELL	24	0.5741	1.3929	0.118367	0.293499	1	3811	tags=67%, list=25%, signal=89%
GOMF_PROTEIN_SELF_ASSOCIATION	GOMF_PROTEIN_SELF_ASSOCIATION	52	0.425622	1.39255	0.0610998	0.293794	1	2965	tags=29%, list=19%, signal=36%
GOBP_FEAR_RESPONSE	GOBP_FEAR_RESPONSE	34	0.543811	1.39251	0.0566406	0.293576	1	1421	tags=26%, list=9%, signal=29%
GOBP_PHOSPHATIDYLSERINE_METABOLIC_PROCESS	GOBP_PHOSPHATIDYLSERINE_METABOLIC_PROCESS	34	0.523662	1.39237	0.0803922	0.293495	1	4274	tags=53%, list=28%, signal=73%
GOMF_NAD_BINDING	GOMF_NAD_BINDING	53	0.380464	1.39235	0.0756646	0.293229	1	2107	tags=15%, list=14%, signal=17%
GOBP_RESPONSE_TO_COLD	GOBP_RESPONSE_TO_COLD	44	0.453803	1.3921	0.056926	0.29332	1	3234	tags=34%, list=21%, signal=43%
GOBP_NEUROMUSCULAR_JUNCTION_DEVELOPMENT	GOBP_NEUROMUSCULAR_JUNCTION_DEVELOPMENT	46	0.483159	1.39181	0.0608519	0.293568	1	3483	tags=37%, list=23%, signal=48%
GOBP_REGULATION_OF_CARDIAC_MUSCLE_CONTRACTION_BY_CALCIUM_ION_SIGNALING	GOBP_REGULATION_OF_CARDIAC_MUSCLE_CONTRACTION_BY_CALCIUM_ION_SIGNALING	24	0.610359	1.39157	0.0762887	0.293662	1	2010	tags=38%, list=13%, signal=43%
GOBP_STEM_CELL_DIVISION	GOBP_STEM_CELL_DIVISION	23	0.540098	1.39155	0.0978044	0.293402	1	3296	tags=35%, list=21%, signal=44%
GOBP_REGULATION_OF_SMOOTH_MUSCLE_CELL_DIFFERENTIATION	GOBP_REGULATION_OF_SMOOTH_MUSCLE_CELL_DIFFERENTIATION	29	0.515363	1.39144	0.0934394	0.293286	1	5825	tags=72%, list=38%, signal=116%
GOBP_HEART_GROWTH	GOBP_HEART_GROWTH	78	0.465302	1.39065	0.0875486	0.294296	1	2862	tags=31%, list=19%, signal=38%
GOBP_GLOMERULUS_DEVELOPMENT	GOBP_GLOMERULUS_DEVELOPMENT	59	0.523926	1.39026	0.0649606	0.294685	1	2566	tags=36%, list=17%, signal=43%
GOCC_TRANS_GOLGI_NETWORK_MEMBRANE	GOCC_TRANS_GOLGI_NETWORK_MEMBRANE	81	0.332064	1.38996	0.0727273	0.294934	1	4851	tags=33%, list=32%, signal=48%
GOMF_GLUTATHIONE_TRANSFERASE_ACTIVITY	GOMF_GLUTATHIONE_TRANSFERASE_ACTIVITY	18	0.568834	1.38983	0.108163	0.29486	1	3251	tags=39%, list=21%, signal=49%
GOBP_VASCULAR_ENDOTHELIAL_GROWTH_FACTOR_SIGNALING_PATHWAY	GOBP_VASCULAR_ENDOTHELIAL_GROWTH_FACTOR_SIGNALING_PATHWAY	38	0.522917	1.38977	0.0879346	0.294686	1	3112	tags=39%, list=20%, signal=49%
GOBP_POSITIVE_REGULATION_OF_STRESS_FIBER_ASSEMBLY	GOBP_POSITIVE_REGULATION_OF_STRESS_FIBER_ASSEMBLY	49	0.423128	1.38967	0.0700758	0.294559	1	3237	tags=29%, list=21%, signal=36%
GOBP_GLYCEROLIPID_METABOLIC_PROCESS	GOBP_GLYCEROLIPID_METABOLIC_PROCESS	383	0.34436	1.38957	0.0472441	0.294435	1	4362	tags=35%, list=28%, signal=48%
GOBP_ENDOCARDIAL_CUSHION_MORPHOGENESIS	GOBP_ENDOCARDIAL_CUSHION_MORPHOGENESIS	33	0.556211	1.38948	0.0801527	0.294312	1	2254	tags=30%, list=15%, signal=35%
GOBP_POSITIVE_REGULATION_OF_INTERFERON_ALPHA_PRODUCTION	GOBP_POSITIVE_REGULATION_OF_INTERFERON_ALPHA_PRODUCTION	22	0.546577	1.38944	0.150391	0.29412	1	2312	tags=27%, list=15%, signal=32%
GOBP_RESPONSE_TO_ISOQUINOLINE_ALKALOID	GOBP_RESPONSE_TO_ISOQUINOLINE_ALKALOID	29	0.506225	1.38931	0.0875486	0.294002	1	996	tags=21%, list=6%, signal=22%
GOMF_FIBROBLAST_GROWTH_FACTOR_RECEPTOR_BINDING	GOMF_FIBROBLAST_GROWTH_FACTOR_RECEPTOR_BINDING	24	0.576038	1.38926	0.0538922	0.293785	1	1737	tags=29%, list=11%, signal=33%
GOCC_BASAL_PART_OF_CELL	GOCC_BASAL_PART_OF_CELL	246	0.404639	1.38923	0.0153846	0.293554	1	3308	tags=31%, list=22%, signal=39%
GOBP_DETECTION_OF_EXTERNAL_BIOTIC_STIMULUS	GOBP_DETECTION_OF_EXTERNAL_BIOTIC_STIMULUS	21	0.601875	1.38863	0.0977597	0.294327	1	2954	tags=52%, list=19%, signal=65%
GOBP_NEGATIVE_REGULATION_OF_ANTIGEN_RECEPTOR_MEDIATED_SIGNALING_PATHWAY	GOBP_NEGATIVE_REGULATION_OF_ANTIGEN_RECEPTOR_MEDIATED_SIGNALING_PATHWAY	29	0.635352	1.38854	0.136	0.294197	1	3138	tags=52%, list=20%, signal=65%
GOBP_REGULATION_OF_CELL_MORPHOGENESIS	GOBP_REGULATION_OF_CELL_MORPHOGENESIS	283	0.358009	1.38835	0.0389864	0.294287	1	3879	tags=36%, list=25%, signal=47%
GOMF_PROTEIN_PHOSPHATASE_1_BINDING	GOMF_PROTEIN_PHOSPHATASE_1_BINDING	28	0.467861	1.38818	0.0807692	0.294275	1	3462	tags=32%, list=23%, signal=41%
GOBP_REGULATION_OF_NEUTROPHIL_MIGRATION	GOBP_REGULATION_OF_NEUTROPHIL_MIGRATION	38	0.533753	1.38803	0.102823	0.294238	1	3502	tags=53%, list=23%, signal=68%
GOMF_MICROFILAMENT_MOTOR_ACTIVITY	GOMF_MICROFILAMENT_MOTOR_ACTIVITY	28	0.512886	1.38744	0.059761	0.294927	1	3929	tags=43%, list=26%, signal=57%
GOBP_CELLULAR_RESPONSE_TO_LIPID	GOBP_CELLULAR_RESPONSE_TO_LIPID	494	0.399669	1.38712	0.0398406	0.295173	1	2893	tags=28%, list=19%, signal=34%
GOBP_RESPONSE_TO_TUMOR_NECROSIS_FACTOR	GOBP_RESPONSE_TO_TUMOR_NECROSIS_FACTOR	261	0.399236	1.38677	0.0891473	0.295454	1	3152	tags=28%, list=21%, signal=35%
GOMF_OXIDOREDUCTASE_ACTIVITY_ACTING_ON_NAD_P_H_OXYGEN_AS_ACCEPTOR	GOMF_OXIDOREDUCTASE_ACTIVITY_ACTING_ON_NAD_P_H_OXYGEN_AS_ACCEPTOR	16	0.603181	1.38623	0.0694981	0.296137	1	2436	tags=56%, list=16%, signal=67%
GOBP_PROTEIN_LOCALIZATION_TO_CELL_PERIPHERY	GOBP_PROTEIN_LOCALIZATION_TO_CELL_PERIPHERY	305	0.334928	1.38555	0.0415842	0.297064	1	4270	tags=33%, list=28%, signal=45%
GOBP_STEROID_HORMONE_MEDIATED_SIGNALING_PATHWAY	GOBP_STEROID_HORMONE_MEDIATED_SIGNALING_PATHWAY	120	0.367942	1.38546	0.0632911	0.296928	1	2203	tags=17%, list=14%, signal=19%
GOBP_ENDOSOMAL_TRANSPORT	GOBP_ENDOSOMAL_TRANSPORT	201	0.248035	1.38501	0.0956023	0.29739	1	5451	tags=34%, list=35%, signal=52%
GOBP_CYCLIC_NUCLEOTIDE_BIOSYNTHETIC_PROCESS	GOBP_CYCLIC_NUCLEOTIDE_BIOSYNTHETIC_PROCESS	20	0.55314	1.38499	0.082	0.297129	1	4320	tags=55%, list=28%, signal=76%
GOBP_PROTEIN_KINASE_A_SIGNALING	GOBP_PROTEIN_KINASE_A_SIGNALING	32	0.502379	1.38476	0.0725191	0.297268	1	1790	tags=25%, list=12%, signal=28%
GOBP_REGULATION_OF_JNK_CASCADE	GOBP_REGULATION_OF_JNK_CASCADE	125	0.39829	1.3847	0.0457256	0.297046	1	4123	tags=37%, list=27%, signal=50%
GOBP_PHARYNGEAL_SYSTEM_DEVELOPMENT	GOBP_PHARYNGEAL_SYSTEM_DEVELOPMENT	21	0.572103	1.38464	0.0804829	0.296863	1	3204	tags=43%, list=21%, signal=54%
GOBP_REGULATION_OF_PROTEIN_POLYMERIZATION	GOBP_REGULATION_OF_PROTEIN_POLYMERIZATION	198	0.358179	1.38442	0.0615672	0.296961	1	3210	tags=28%, list=21%, signal=35%
GOBP_REGULATION_OF_PHOSPHOLIPID_METABOLIC_PROCESS	GOBP_REGULATION_OF_PHOSPHOLIPID_METABOLIC_PROCESS	33	0.443001	1.3844	0.0984848	0.296686	1	1990	tags=24%, list=13%, signal=28%
GOBP_AORTIC_VALVE_MORPHOGENESIS	GOBP_AORTIC_VALVE_MORPHOGENESIS	31	0.578222	1.38402	0.0992509	0.297046	1	2198	tags=32%, list=14%, signal=38%
GOBP_APOPTOTIC_DNA_FRAGMENTATION	GOBP_APOPTOTIC_DNA_FRAGMENTATION	21	0.527549	1.38331	0.110465	0.298	1	74	tags=10%, list=0%, signal=10%
GOBP_B_CELL_DIFFERENTIATION	GOBP_B_CELL_DIFFERENTIATION	130	0.450904	1.38275	0.135458	0.298653	1	2303	tags=28%, list=15%, signal=32%
GOCC_TERTIARY_GRANULE	GOCC_TERTIARY_GRANULE	154	0.448707	1.38259	0.119923	0.298636	1	4080	tags=41%, list=27%, signal=55%
GOBP_NEGATIVE_REGULATION_OF_RECEPTOR_SIGNALING_PATHWAY_VIA_STAT	GOBP_NEGATIVE_REGULATION_OF_RECEPTOR_SIGNALING_PATHWAY_VIA_STAT	23	0.495925	1.38238	0.112381	0.298698	1	2380	tags=26%, list=15%, signal=31%
GOMF_RNA_POLYMERASE_II_TRANSCRIPTION_COREGULATOR_BINDING	GOMF_RNA_POLYMERASE_II_TRANSCRIPTION_COREGULATOR_BINDING	24	0.410765	1.38211	0.120792	0.298888	1	2203	tags=17%, list=14%, signal=19%
GOBP_REGULATION_OF_COMPLEMENT_ACTIVATION	GOBP_REGULATION_OF_COMPLEMENT_ACTIVATION	47	0.575314	1.3821	0.0958904	0.298611	1	2796	tags=53%, list=18%, signal=65%
GOBP_REGULATION_OF_FAT_CELL_DIFFERENTIATION	GOBP_REGULATION_OF_FAT_CELL_DIFFERENTIATION	114	0.40395	1.38207	0.0673077	0.298377	1	3375	tags=28%, list=22%, signal=36%
GOBP_MUSCLE_CELL_CELLULAR_HOMEOSTASIS	GOBP_MUSCLE_CELL_CELLULAR_HOMEOSTASIS	18	0.536451	1.38197	0.0889328	0.298229	1	4502	tags=56%, list=29%, signal=79%
GOCC_SODIUM_CHANNEL_COMPLEX	GOCC_SODIUM_CHANNEL_COMPLEX	26	0.629419	1.38176	0.0843137	0.298351	1	1647	tags=27%, list=11%, signal=30%
GOBP_LONG_TERM_SYNAPTIC_POTENTIATION	GOBP_LONG_TERM_SYNAPTIC_POTENTIATION	77	0.492687	1.381	0.0601942	0.299289	1	4016	tags=44%, list=26%, signal=59%
GOBP_RESPONSE_TO_INTERFERON_BETA	GOBP_RESPONSE_TO_INTERFERON_BETA	26	0.527596	1.38058	0.154739	0.299686	1	3406	tags=38%, list=22%, signal=49%
GOBP_REGULATION_OF_MULTI_ORGANISM_PROCESS	GOBP_REGULATION_OF_MULTI_ORGANISM_PROCESS	42	0.495572	1.38048	0.0530303	0.299536	1	2826	tags=38%, list=18%, signal=47%
GOBP_WATER_TRANSPORT	GOBP_WATER_TRANSPORT	21	0.613794	1.38048	0.0692308	0.299252	1	1690	tags=29%, list=11%, signal=32%
GOBP_RESPONSE_TO_INCREASED_OXYGEN_LEVELS	GOBP_RESPONSE_TO_INCREASED_OXYGEN_LEVELS	27	0.462018	1.38024	0.110672	0.299388	1	1966	tags=22%, list=13%, signal=25%
GOBP_FATTY_ACID_BETA_OXIDATION_USING_ACYL_COA_OXIDASE	GOBP_FATTY_ACID_BETA_OXIDATION_USING_ACYL_COA_OXIDASE	15	0.535133	1.38013	0.1258	0.299292	1	4284	tags=40%, list=28%, signal=55%
GOBP_T_CELL_MIGRATION	GOBP_T_CELL_MIGRATION	59	0.542216	1.3801	0.125514	0.299045	1	3234	tags=47%, list=21%, signal=60%
GOBP_SOMATIC_DIVERSIFICATION_OF_IMMUNE_RECEPTORS	GOBP_SOMATIC_DIVERSIFICATION_OF_IMMUNE_RECEPTORS	62	0.447961	1.37977	0.144554	0.299329	1	2032	tags=21%, list=13%, signal=24%
GOCC_CONTRACTILE_FIBER	GOCC_CONTRACTILE_FIBER	215	0.461314	1.37977	0.0883534	0.29905	1	2982	tags=30%, list=19%, signal=37%
GOBP_ENDOTHELIAL_CELL_PROLIFERATION	GOBP_ENDOTHELIAL_CELL_PROLIFERATION	133	0.484803	1.37969	0.0782443	0.298872	1	3536	tags=41%, list=23%, signal=53%
GOCC_VOLTAGE_GATED_SODIUM_CHANNEL_COMPLEX	GOCC_VOLTAGE_GATED_SODIUM_CHANNEL_COMPLEX	17	0.678576	1.37948	0.0836502	0.298921	1	1647	tags=35%, list=11%, signal=39%
GOBP_VESICLE_ORGANIZATION	GOBP_VESICLE_ORGANIZATION	302	0.277947	1.3794	0.0295276	0.298774	1	4993	tags=33%, list=33%, signal=48%
GOMF_INTEGRIN_BINDING	GOMF_INTEGRIN_BINDING	131	0.472038	1.37901	0.0945946	0.299129	1	2862	tags=35%, list=19%, signal=43%
GOMF_DYNEIN_INTERMEDIATE_CHAIN_BINDING	GOMF_DYNEIN_INTERMEDIATE_CHAIN_BINDING	25	0.623265	1.37854	0.150602	0.299639	1	2131	tags=40%, list=14%, signal=46%
GOBP_MYOFIBRIL_ASSEMBLY	GOBP_MYOFIBRIL_ASSEMBLY	56	0.532637	1.37819	0.0838446	0.299942	1	2818	tags=36%, list=18%, signal=44%
GOBP_POSITIVE_REGULATION_OF_CALCIUM_ION_TRANSPORT_INTO_CYTOSOL	GOBP_POSITIVE_REGULATION_OF_CALCIUM_ION_TRANSPORT_INTO_CYTOSOL	49	0.508453	1.37754	0.0651769	0.300681	1	3353	tags=43%, list=22%, signal=55%
GOBP_LAMELLIPODIUM_ASSEMBLY	GOBP_LAMELLIPODIUM_ASSEMBLY	66	0.398379	1.37748	0.0821355	0.30051	1	2686	tags=26%, list=17%, signal=31%
GOCC_INTRINSIC_COMPONENT_OF_EXTERNAL_SIDE_OF_PLASMA_MEMBRANE	GOCC_INTRINSIC_COMPONENT_OF_EXTERNAL_SIDE_OF_PLASMA_MEMBRANE	20	0.613302	1.37717	0.0865385	0.300747	1	3869	tags=65%, list=25%, signal=87%
GOBP_SODIUM_ION_HOMEOSTASIS	GOBP_SODIUM_ION_HOMEOSTASIS	51	0.529434	1.37698	0.0422535	0.300776	1	2621	tags=33%, list=17%, signal=40%
GOCC_FICOLIN_1_RICH_GRANULE	GOCC_FICOLIN_1_RICH_GRANULE	177	0.357347	1.37688	0.15739	0.300673	1	2953	tags=21%, list=19%, signal=26%
GOBP_NEGATIVE_REGULATION_OF_SUPRAMOLECULAR_FIBER_ORGANIZATION	GOBP_NEGATIVE_REGULATION_OF_SUPRAMOLECULAR_FIBER_ORGANIZATION	139	0.392501	1.37687	0.0782443	0.300404	1	3532	tags=37%, list=23%, signal=47%
GOCC_BASOLATERAL_PLASMA_MEMBRANE	GOCC_BASOLATERAL_PLASMA_MEMBRANE	200	0.403402	1.37682	0.015534	0.300205	1	3083	tags=29%, list=20%, signal=36%
GOMF_14_3_3_PROTEIN_BINDING	GOMF_14_3_3_PROTEIN_BINDING	28	0.380479	1.3766	0.11553	0.300304	1	3186	tags=25%, list=21%, signal=31%
GOBP_CELLULAR_RESPONSE_TO_OXYGEN_RADICAL	GOBP_CELLULAR_RESPONSE_TO_OXYGEN_RADICAL	20	0.492944	1.37639	0.108434	0.30036	1	2686	tags=30%, list=17%, signal=36%
GOBP_REGULATION_OF_T_CELL_RECEPTOR_SIGNALING_PATHWAY	GOBP_REGULATION_OF_T_CELL_RECEPTOR_SIGNALING_PATHWAY	37	0.5983	1.37629	0.165029	0.300249	1	2560	tags=35%, list=17%, signal=42%
GOBP_ERYTHROCYTE_HOMEOSTASIS	GOBP_ERYTHROCYTE_HOMEOSTASIS	108	0.333184	1.3762	0.0929791	0.300105	1	2786	tags=21%, list=18%, signal=26%
GOBP_NEGATIVE_REGULATION_OF_CYTOSKELETON_ORGANIZATION	GOBP_NEGATIVE_REGULATION_OF_CYTOSKELETON_ORGANIZATION	136	0.38357	1.37617	0.0707457	0.29989	1	3532	tags=35%, list=23%, signal=45%
GOMF_GROWTH_FACTOR_RECEPTOR_BINDING	GOMF_GROWTH_FACTOR_RECEPTOR_BINDING	134	0.438665	1.37565	0.0396825	0.300441	1	2266	tags=25%, list=15%, signal=30%
GOBP_ACTIVATION_OF_CYSTEINE_TYPE_ENDOPEPTIDASE_ACTIVITY	GOBP_ACTIVATION_OF_CYSTEINE_TYPE_ENDOPEPTIDASE_ACTIVITY	15	0.531581	1.37559	0.137787	0.300274	1	3011	tags=47%, list=20%, signal=58%
GOBP_REGULATION_OF_PLASMA_LIPOPROTEIN_PARTICLE_LEVELS	GOBP_REGULATION_OF_PLASMA_LIPOPROTEIN_PARTICLE_LEVELS	85	0.46326	1.37545	0.0779727	0.300217	1	2976	tags=35%, list=19%, signal=44%
GOBP_REGULATION_OF_RESPONSE_TO_OXIDATIVE_STRESS	GOBP_REGULATION_OF_RESPONSE_TO_OXIDATIVE_STRESS	73	0.391267	1.3754	0.0592885	0.300016	1	2236	tags=22%, list=15%, signal=26%
GOBP_NEGATIVE_REGULATION_OF_DNA_BIOSYNTHETIC_PROCESS	GOBP_NEGATIVE_REGULATION_OF_DNA_BIOSYNTHETIC_PROCESS	33	0.406627	1.37511	0.104743	0.300247	1	3204	tags=24%, list=21%, signal=31%
GOBP_MYOBLAST_DIFFERENTIATION	GOBP_MYOBLAST_DIFFERENTIATION	76	0.445598	1.37496	0.0718447	0.300244	1	2998	tags=32%, list=20%, signal=39%
GOBP_NEGATIVE_REGULATION_OF_INTRACELLULAR_SIGNAL_TRANSDUCTION	GOBP_NEGATIVE_REGULATION_OF_INTRACELLULAR_SIGNAL_TRANSDUCTION	435	0.330594	1.37472	0.0633397	0.300338	1	3822	tags=30%, list=25%, signal=39%
GOBP_PLATELET_ACTIVATION	GOBP_PLATELET_ACTIVATION	147	0.437679	1.37469	0.0849421	0.300093	1	3015	tags=35%, list=20%, signal=43%
GOBP_POSITIVE_REGULATION_OF_MYELOID_LEUKOCYTE_CYTOKINE_PRODUCTION_INVOLVED_IN_IMMUNE_RESPONSE	GOBP_POSITIVE_REGULATION_OF_MYELOID_LEUKOCYTE_CYTOKINE_PRODUCTION_INVOLVED_IN_IMMUNE_RESPONSE	16	0.564907	1.37465	0.129771	0.299891	1	2430	tags=31%, list=16%, signal=37%
GOBP_ASTROCYTE_DEVELOPMENT	GOBP_ASTROCYTE_DEVELOPMENT	36	0.549965	1.37457	0.104046	0.299752	1	3211	tags=44%, list=21%, signal=56%
GOBP_FILOPODIUM_ASSEMBLY	GOBP_FILOPODIUM_ASSEMBLY	54	0.419085	1.37455	0.100604	0.299497	1	3114	tags=30%, list=20%, signal=37%
GOBP_NEGATIVE_REGULATION_OF_PROTEIN_LOCALIZATION_TO_NUCLEUS	GOBP_NEGATIVE_REGULATION_OF_PROTEIN_LOCALIZATION_TO_NUCLEUS	28	0.504575	1.3745	0.0992218	0.299304	1	880	tags=18%, list=6%, signal=19%
GOBP_POSITIVE_REGULATION_OF_CIRCADIAN_RHYTHM	GOBP_POSITIVE_REGULATION_OF_CIRCADIAN_RHYTHM	15	0.532454	1.37433	0.0816733	0.299291	1	1570	tags=27%, list=10%, signal=30%
GOCC_INTRINSIC_COMPONENT_OF_PRESYNAPTIC_MEMBRANE	GOCC_INTRINSIC_COMPONENT_OF_PRESYNAPTIC_MEMBRANE	62	0.531514	1.37422	0.0608519	0.299205	1	1346	tags=23%, list=9%, signal=25%
GOBP_POSITIVE_REGULATION_OF_REACTIVE_OXYGEN_SPECIES_METABOLIC_PROCESS	GOBP_POSITIVE_REGULATION_OF_REACTIVE_OXYGEN_SPECIES_METABOLIC_PROCESS	91	0.468085	1.37421	0.0776892	0.298958	1	2300	tags=30%, list=15%, signal=35%
GOBP_CARBOHYDRATE_DERIVATIVE_CATABOLIC_PROCESS	GOBP_CARBOHYDRATE_DERIVATIVE_CATABOLIC_PROCESS	176	0.38775	1.37368	0.0461847	0.299587	1	4280	tags=43%, list=28%, signal=59%
GOBP_MYELOID_LEUKOCYTE_MIGRATION	GOBP_MYELOID_LEUKOCYTE_MIGRATION	186	0.489344	1.37368	0.0770713	0.299314	1	3152	tags=42%, list=21%, signal=52%
GOMF_POLYSACCHARIDE_BINDING	GOMF_POLYSACCHARIDE_BINDING	20	0.582706	1.37354	0.0754352	0.299295	1	2901	tags=50%, list=19%, signal=62%
GOMF_PRIMARY_ACTIVE_TRANSMEMBRANE_TRANSPORTER_ACTIVITY	GOMF_PRIMARY_ACTIVE_TRANSMEMBRANE_TRANSPORTER_ACTIVITY	59	0.475806	1.37349	0.054878	0.299132	1	2851	tags=34%, list=19%, signal=41%
GOBP_REGULATION_OF_CELLULAR_EXTRAVASATION	GOBP_REGULATION_OF_CELLULAR_EXTRAVASATION	32	0.55467	1.37346	0.0818713	0.298901	1	2314	tags=41%, list=15%, signal=48%
GOBP_MULTICELLULAR_ORGANISMAL_MOVEMENT	GOBP_MULTICELLULAR_ORGANISMAL_MOVEMENT	52	0.494433	1.37289	0.0530452	0.299568	1	2286	tags=29%, list=15%, signal=34%
GOMF_PROTEIN_SERINE_THREONINE_KINASE_INHIBITOR_ACTIVITY	GOMF_PROTEIN_SERINE_THREONINE_KINASE_INHIBITOR_ACTIVITY	28	0.44038	1.37284	0.104603	0.299404	1	1790	tags=18%, list=12%, signal=20%
GOMF_ION_CHANNEL_BINDING	GOMF_ION_CHANNEL_BINDING	120	0.41708	1.37264	0.0621242	0.29944	1	1925	tags=22%, list=13%, signal=25%
GOMF_SODIUM_ION_TRANSMEMBRANE_TRANSPORTER_ACTIVITY	GOMF_SODIUM_ION_TRANSMEMBRANE_TRANSPORTER_ACTIVITY	134	0.487063	1.37259	0.0295858	0.299273	1	3645	tags=39%, list=24%, signal=50%
GOMF_ALPHA_ACTININ_BINDING	GOMF_ALPHA_ACTININ_BINDING	24	0.598914	1.37248	0.0885312	0.299189	1	3909	tags=67%, list=25%, signal=89%
GOCC_NEURON_SPINE	GOCC_NEURON_SPINE	163	0.443837	1.37238	0.0712871	0.299093	1	3350	tags=36%, list=22%, signal=45%
GOBP_POSITIVE_REGULATION_OF_OLIGODENDROCYTE_DIFFERENTIATION	GOBP_POSITIVE_REGULATION_OF_OLIGODENDROCYTE_DIFFERENTIATION	21	0.543171	1.37168	0.0794574	0.29998	1	3311	tags=38%, list=22%, signal=48%
GOBP_REGULATION_OF_THE_FORCE_OF_HEART_CONTRACTION	GOBP_REGULATION_OF_THE_FORCE_OF_HEART_CONTRACTION	25	0.573072	1.37153	0.0983936	0.299965	1	1477	tags=28%, list=10%, signal=31%
GOMF_FLIPPASE_ACTIVITY	GOMF_FLIPPASE_ACTIVITY	16	0.622283	1.37147	0.0945674	0.299782	1	2602	tags=56%, list=17%, signal=68%
GOBP_POSITIVE_REGULATION_OF_NATURAL_KILLER_CELL_MEDIATED_IMMUNITY	GOBP_POSITIVE_REGULATION_OF_NATURAL_KILLER_CELL_MEDIATED_IMMUNITY	25	0.705514	1.37123	0.111984	0.299901	1	2989	tags=68%, list=19%, signal=84%
GOBP_NEGATIVE_REGULATION_OF_LYMPHOCYTE_ACTIVATION	GOBP_NEGATIVE_REGULATION_OF_LYMPHOCYTE_ACTIVATION	137	0.477998	1.37064	0.123753	0.300558	1	2587	tags=38%, list=17%, signal=45%
GOBP_ACTIVATION_OF_ADENYLATE_CYCLASE_ACTIVITY	GOBP_ACTIVATION_OF_ADENYLATE_CYCLASE_ACTIVITY	34	0.541709	1.37039	0.0718563	0.300654	1	3109	tags=41%, list=20%, signal=52%
GOBP_POSITIVE_REGULATION_OF_LIPID_KINASE_ACTIVITY	GOBP_POSITIVE_REGULATION_OF_LIPID_KINASE_ACTIVITY	37	0.543394	1.37013	0.098646	0.300824	1	1954	tags=30%, list=13%, signal=34%
GOBP_NEGATIVE_REGULATION_OF_CELLULAR_PROTEIN_LOCALIZATION	GOBP_NEGATIVE_REGULATION_OF_CELLULAR_PROTEIN_LOCALIZATION	99	0.376359	1.37009	0.0776699	0.300619	1	4329	tags=30%, list=28%, signal=42%
GOBP_POSITIVE_REGULATION_OF_MAP_KINASE_ACTIVITY	GOBP_POSITIVE_REGULATION_OF_MAP_KINASE_ACTIVITY	213	0.387599	1.36973	0.034	0.300951	1	3403	tags=31%, list=22%, signal=40%
GOMF_P53_BINDING	GOMF_P53_BINDING	62	0.344777	1.36962	0.0843137	0.300883	1	1249	tags=10%, list=8%, signal=10%
GOMF_CALCIUM_ION_TRANSMEMBRANE_TRANSPORTER_ACTIVITY	GOMF_CALCIUM_ION_TRANSMEMBRANE_TRANSPORTER_ACTIVITY	123	0.419286	1.3696	0.0374753	0.300642	1	2647	tags=24%, list=17%, signal=29%
GOBP_PLASMA_MEMBRANE_ORGANIZATION	GOBP_PLASMA_MEMBRANE_ORGANIZATION	103	0.385264	1.36948	0.0660194	0.300555	1	3472	tags=34%, list=23%, signal=44%
GOBP_TISSUE_REMODELING	GOBP_TISSUE_REMODELING	156	0.434248	1.36942	0.0763359	0.300368	1	2906	tags=32%, list=19%, signal=39%
GOBP_NEGATIVE_REGULATION_OF_SODIUM_ION_TRANSPORT	GOBP_NEGATIVE_REGULATION_OF_SODIUM_ION_TRANSPORT	18	0.550406	1.36929	0.0907298	0.300326	1	1196	tags=22%, list=8%, signal=24%
GOBP_SMOOTH_MUSCLE_CELL_APOPTOTIC_PROCESS	GOBP_SMOOTH_MUSCLE_CELL_APOPTOTIC_PROCESS	22	0.569048	1.36924	0.0907258	0.30013	1	3512	tags=45%, list=23%, signal=59%
GOMF_TRANSMEMBRANE_RECEPTOR_PROTEIN_SERINE_THREONINE_KINASE_ACTIVITY	GOMF_TRANSMEMBRANE_RECEPTOR_PROTEIN_SERINE_THREONINE_KINASE_ACTIVITY	17	0.561896	1.36837	0.108268	0.301254	1	3541	tags=47%, list=23%, signal=61%
GOBP_CD40_SIGNALING_PATHWAY	GOBP_CD40_SIGNALING_PATHWAY	15	0.592517	1.36832	0.146825	0.301088	1	2453	tags=40%, list=16%, signal=48%
GOBP_CELLULAR_RESPONSE_TO_NUTRIENT	GOBP_CELLULAR_RESPONSE_TO_NUTRIENT	40	0.509509	1.36828	0.0636183	0.30087	1	1872	tags=30%, list=12%, signal=34%
GOBP_VESICLE_MEDIATED_TRANSPORT_TO_THE_PLASMA_MEMBRANE	GOBP_VESICLE_MEDIATED_TRANSPORT_TO_THE_PLASMA_MEMBRANE	81	0.307449	1.36814	0.0928433	0.30085	1	4217	tags=26%, list=27%, signal=36%
GOBP_FAT_CELL_DIFFERENTIATION	GOBP_FAT_CELL_DIFFERENTIATION	193	0.383312	1.36765	0.0604915	0.301349	1	3375	tags=28%, list=22%, signal=36%
GOBP_POSITIVE_REGULATION_OF_MYELOID_LEUKOCYTE_DIFFERENTIATION	GOBP_POSITIVE_REGULATION_OF_MYELOID_LEUKOCYTE_DIFFERENTIATION	53	0.489368	1.36757	0.0856031	0.301235	1	4001	tags=55%, list=26%, signal=74%
GOBP_ADENYLATE_CYCLASE_ACTIVATING_G_PROTEIN_COUPLED_RECEPTOR_SIGNALING_PATHWAY	GOBP_ADENYLATE_CYCLASE_ACTIVATING_G_PROTEIN_COUPLED_RECEPTOR_SIGNALING_PATHWAY	113	0.455318	1.36696	0.0507519	0.302008	1	3660	tags=40%, list=24%, signal=52%
GOBP_EXPLORATION_BEHAVIOR	GOBP_EXPLORATION_BEHAVIOR	17	0.607881	1.36696	0.0758483	0.301742	1	1577	tags=35%, list=10%, signal=39%
GOBP_RESPONSE_TO_MUSCLE_STRETCH	GOBP_RESPONSE_TO_MUSCLE_STRETCH	22	0.556835	1.36693	0.10609	0.301533	1	3174	tags=45%, list=21%, signal=57%
GOBP_ESTABLISHMENT_OF_ENDOTHELIAL_BARRIER	GOBP_ESTABLISHMENT_OF_ENDOTHELIAL_BARRIER	47	0.440182	1.36681	0.101761	0.301435	1	4386	tags=47%, list=29%, signal=65%
GOMF_GLYCOLIPID_BINDING	GOMF_GLYCOLIPID_BINDING	26	0.519378	1.36681	0.098	0.301173	1	423	tags=15%, list=3%, signal=16%
GOBP_RECEPTOR_CATABOLIC_PROCESS	GOBP_RECEPTOR_CATABOLIC_PROCESS	34	0.394373	1.36677	0.146	0.300968	1	3375	tags=32%, list=22%, signal=41%
GOBP_CELLULAR_RESPONSE_TO_PEPTIDE	GOBP_CELLULAR_RESPONSE_TO_PEPTIDE	353	0.347248	1.36659	0.0311891	0.30095	1	3182	tags=26%, list=21%, signal=32%
GOBP_PHOSPHATIDYLINOSITOL_DEPHOSPHORYLATION	GOBP_PHOSPHATIDYLINOSITOL_DEPHOSPHORYLATION	27	0.381983	1.36649	0.118812	0.300828	1	4627	tags=56%, list=30%, signal=79%
GOBP_NEGATIVE_REGULATION_OF_PEPTIDYL_SERINE_PHOSPHORYLATION	GOBP_NEGATIVE_REGULATION_OF_PEPTIDYL_SERINE_PHOSPHORYLATION	24	0.464285	1.36602	0.104651	0.301364	1	4329	tags=50%, list=28%, signal=70%
GOMF_HEPARIN_BINDING	GOMF_HEPARIN_BINDING	142	0.513944	1.36602	0.0589354	0.301108	1	2624	tags=37%, list=17%, signal=45%
GOBP_POSITIVE_REGULATION_OF_SYNAPTIC_TRANSMISSION	GOBP_POSITIVE_REGULATION_OF_SYNAPTIC_TRANSMISSION	136	0.460616	1.36597	0.0522244	0.300917	1	3514	tags=36%, list=23%, signal=46%
GOBP_RESPONSE_TO_SALT_STRESS	GOBP_RESPONSE_TO_SALT_STRESS	24	0.468407	1.3659	0.0818363	0.300771	1	2683	tags=25%, list=17%, signal=30%
GOBP_ESTABLISHMENT_OR_MAINTENANCE_OF_CELL_POLARITY	GOBP_ESTABLISHMENT_OR_MAINTENANCE_OF_CELL_POLARITY	198	0.332802	1.36584	0.0537428	0.300598	1	3754	tags=26%, list=24%, signal=34%
GOBP_POSITIVE_REGULATION_OF_TOLL_LIKE_RECEPTOR_SIGNALING_PATHWAY	GOBP_POSITIVE_REGULATION_OF_TOLL_LIKE_RECEPTOR_SIGNALING_PATHWAY	25	0.520551	1.36533	0.128906	0.301137	1	2200	tags=32%, list=14%, signal=37%
GOBP_POSITIVE_REGULATION_OF_RHO_PROTEIN_SIGNAL_TRANSDUCTION	GOBP_POSITIVE_REGULATION_OF_RHO_PROTEIN_SIGNAL_TRANSDUCTION	30	0.565135	1.36514	0.0843373	0.301201	1	2296	tags=37%, list=15%, signal=43%
GOCC_INCLUSION_BODY	GOCC_INCLUSION_BODY	66	0.358546	1.3651	0.0881764	0.300999	1	3075	tags=26%, list=20%, signal=32%
GOBP_REGULATION_OF_T_CELL_MIGRATION	GOBP_REGULATION_OF_T_CELL_MIGRATION	39	0.530253	1.36503	0.12753	0.300854	1	2478	tags=33%, list=16%, signal=40%
GOBP_REGULATION_OF_PROTEIN_KINASE_C_SIGNALING	GOBP_REGULATION_OF_PROTEIN_KINASE_C_SIGNALING	15	0.540962	1.36494	0.0898662	0.300726	1	1837	tags=33%, list=12%, signal=38%
GOBP_REGULATION_OF_RELEASE_OF_SEQUESTERED_CALCIUM_ION_INTO_CYTOSOL	GOBP_REGULATION_OF_RELEASE_OF_SEQUESTERED_CALCIUM_ION_INTO_CYTOSOL	67	0.494057	1.3646	0.0475285	0.300972	1	3353	tags=45%, list=22%, signal=57%
GOBP_FOCAL_ADHESION_ASSEMBLY	GOBP_FOCAL_ADHESION_ASSEMBLY	83	0.403553	1.36456	0.124016	0.300781	1	4807	tags=45%, list=31%, signal=65%
GOBP_POSITIVE_REGULATION_OF_GLIOGENESIS	GOBP_POSITIVE_REGULATION_OF_GLIOGENESIS	58	0.465058	1.36444	0.0758755	0.300721	1	3375	tags=36%, list=22%, signal=46%
GOBP_SPERM_MOTILITY	GOBP_SPERM_MOTILITY	72	0.502975	1.36428	0.0845361	0.300686	1	3193	tags=36%, list=21%, signal=45%
GOBP_STRIATED_MUSCLE_ADAPTATION	GOBP_STRIATED_MUSCLE_ADAPTATION	41	0.474598	1.3636	0.0884211	0.301528	1	2711	tags=24%, list=18%, signal=30%
GOBP_OUTFLOW_TRACT_MORPHOGENESIS	GOBP_OUTFLOW_TRACT_MORPHOGENESIS	70	0.481967	1.36313	0.0813954	0.30207	1	3204	tags=37%, list=21%, signal=47%
GOBP_POSITIVE_REGULATION_OF_SYNAPTIC_TRANSMISSION_GLUTAMATERGIC	GOBP_POSITIVE_REGULATION_OF_SYNAPTIC_TRANSMISSION_GLUTAMATERGIC	28	0.573335	1.36309	0.077551	0.301857	1	3876	tags=50%, list=25%, signal=67%
GOBP_NEUROTRANSMITTER_UPTAKE	GOBP_NEUROTRANSMITTER_UPTAKE	37	0.510862	1.36231	0.0587084	0.302909	1	1460	tags=22%, list=10%, signal=24%
GOBP_RHYTHMIC_BEHAVIOR	GOBP_RHYTHMIC_BEHAVIOR	41	0.459065	1.36229	0.0660194	0.302675	1	3301	tags=39%, list=21%, signal=50%
GOBP_REGULATION_OF_TRANSLATION_IN_RESPONSE_TO_STRESS	GOBP_REGULATION_OF_TRANSLATION_IN_RESPONSE_TO_STRESS	21	0.357818	1.36206	0.136273	0.302777	1	3467	tags=19%, list=23%, signal=25%
GOCC_SITE_OF_POLARIZED_GROWTH	GOCC_SITE_OF_POLARIZED_GROWTH	169	0.37625	1.36202	0.0928433	0.302591	1	3183	tags=29%, list=21%, signal=36%
GOMF_PHOSPHATASE_INHIBITOR_ACTIVITY	GOMF_PHOSPHATASE_INHIBITOR_ACTIVITY	38	0.489641	1.36182	0.0910891	0.302678	1	1785	tags=24%, list=12%, signal=27%
GOBP_POSITIVE_REGULATION_OF_ATP_METABOLIC_PROCESS	GOBP_POSITIVE_REGULATION_OF_ATP_METABOLIC_PROCESS	36	0.461283	1.36142	0.0660194	0.303061	1	3211	tags=28%, list=21%, signal=35%
GOBP_REGULATION_OF_SYSTEMIC_ARTERIAL_BLOOD_PRESSURE_BY_RENIN_ANGIOTENSIN	GOBP_REGULATION_OF_SYSTEMIC_ARTERIAL_BLOOD_PRESSURE_BY_RENIN_ANGIOTENSIN	20	0.661344	1.36122	0.0866142	0.303092	1	580	tags=35%, list=4%, signal=36%
GOBP_POSITIVE_REGULATION_OF_CATION_TRANSMEMBRANE_TRANSPORT	GOBP_POSITIVE_REGULATION_OF_CATION_TRANSMEMBRANE_TRANSPORT	120	0.46067	1.3612	0.0363289	0.302847	1	3353	tags=41%, list=22%, signal=52%
GOBP_REGULATION_OF_CELLULAR_CARBOHYDRATE_METABOLIC_PROCESS	GOBP_REGULATION_OF_CELLULAR_CARBOHYDRATE_METABOLIC_PROCESS	127	0.34564	1.36111	0.0590476	0.302722	1	2110	tags=18%, list=14%, signal=21%
GOBP_POSITIVE_REGULATION_OF_ACTIN_FILAMENT_POLYMERIZATION	GOBP_POSITIVE_REGULATION_OF_ACTIN_FILAMENT_POLYMERIZATION	84	0.38687	1.36059	0.0792453	0.303367	1	2818	tags=26%, list=18%, signal=32%
GOBP_MUSCLE_SYSTEM_PROCESS	GOBP_MUSCLE_SYSTEM_PROCESS	401	0.435614	1.36053	0.0522244	0.303202	1	3016	tags=31%, list=20%, signal=37%
GOBP_REGULATION_OF_PROTEIN_CONTAINING_COMPLEX_ASSEMBLY	GOBP_REGULATION_OF_PROTEIN_CONTAINING_COMPLEX_ASSEMBLY	390	0.319708	1.36044	0.049904	0.303129	1	3211	tags=25%, list=21%, signal=30%
GOBP_MYELOID_CELL_DEVELOPMENT	GOBP_MYELOID_CELL_DEVELOPMENT	60	0.421162	1.35988	0.1423	0.303778	1	3203	tags=33%, list=21%, signal=42%
GOBP_DEFENSE_RESPONSE_TO_GRAM_POSITIVE_BACTERIUM	GOBP_DEFENSE_RESPONSE_TO_GRAM_POSITIVE_BACTERIUM	71	0.500671	1.35987	0.0711462	0.303538	1	2989	tags=42%, list=19%, signal=52%
GOBP_BASE_CONVERSION_OR_SUBSTITUTION_EDITING	GOBP_BASE_CONVERSION_OR_SUBSTITUTION_EDITING	18	0.562494	1.35968	0.0935673	0.303567	1	2464	tags=39%, list=16%, signal=46%
GOMF_CYSTEINE_TYPE_ENDOPEPTIDASE_REGULATOR_ACTIVITY_INVOLVED_IN_APOPTOTIC_PROCESS	GOMF_CYSTEINE_TYPE_ENDOPEPTIDASE_REGULATOR_ACTIVITY_INVOLVED_IN_APOPTOTIC_PROCESS	36	0.467166	1.35941	0.11134	0.303759	1	2954	tags=47%, list=19%, signal=58%
GOBP_BLOOD_VESSEL_ENDOTHELIAL_CELL_MIGRATION	GOBP_BLOOD_VESSEL_ENDOTHELIAL_CELL_MIGRATION	106	0.438853	1.35885	0.120623	0.304405	1	2979	tags=32%, list=19%, signal=40%
GOBP_LYMPH_NODE_DEVELOPMENT	GOBP_LYMPH_NODE_DEVELOPMENT	17	0.618153	1.35863	0.117886	0.304483	1	1427	tags=35%, list=9%, signal=39%
GOBP_REGULATION_OF_CELL_JUNCTION_ASSEMBLY	GOBP_REGULATION_OF_CELL_JUNCTION_ASSEMBLY	179	0.426487	1.35828	0.0672098	0.304777	1	3515	tags=32%, list=23%, signal=41%
GOCC_P_BODY	GOCC_P_BODY	77	0.303391	1.35817	0.110039	0.304688	1	4885	tags=31%, list=32%, signal=45%
GOBP_POSITIVE_REGULATION_OF_BLOOD_VESSEL_ENDOTHELIAL_CELL_MIGRATION	GOBP_POSITIVE_REGULATION_OF_BLOOD_VESSEL_ENDOTHELIAL_CELL_MIGRATION	48	0.466642	1.35791	0.128405	0.304841	1	3375	tags=33%, list=22%, signal=43%
GOBP_RESPONSE_TO_PROSTAGLANDIN	GOBP_RESPONSE_TO_PROSTAGLANDIN	29	0.567492	1.35786	0.0885312	0.304651	1	1552	tags=34%, list=10%, signal=38%
GOBP_POSITIVE_REGULATION_OF_PROTEIN_SERINE_THREONINE_KINASE_ACTIVITY	GOBP_POSITIVE_REGULATION_OF_PROTEIN_SERINE_THREONINE_KINASE_ACTIVITY	282	0.357852	1.35776	0.0361446	0.304549	1	3403	tags=29%, list=22%, signal=36%
GOBP_PRI_MIRNA_TRANSCRIPTION_BY_RNA_POLYMERASE_II	GOBP_PRI_MIRNA_TRANSCRIPTION_BY_RNA_POLYMERASE_II	50	0.479731	1.35739	0.123364	0.304867	1	2790	tags=36%, list=18%, signal=44%
GOCC_PLATELET_ALPHA_GRANULE_MEMBRANE	GOCC_PLATELET_ALPHA_GRANULE_MEMBRANE	16	0.603198	1.35733	0.132692	0.304713	1	4158	tags=56%, list=27%, signal=77%
GOBP_RESPONSE_TO_ALCOHOL	GOBP_RESPONSE_TO_ALCOHOL	216	0.409679	1.35732	0.0433925	0.30448	1	3027	tags=29%, list=20%, signal=36%
GOBP_POSITIVE_REGULATION_OF_NATURAL_KILLER_CELL_MEDIATED_CYTOTOXICITY	GOBP_POSITIVE_REGULATION_OF_NATURAL_KILLER_CELL_MEDIATED_CYTOTOXICITY	22	0.698405	1.35729	0.136719	0.304281	1	2263	tags=59%, list=15%, signal=69%
GOBP_NEGATIVE_REGULATION_OF_LEUKOCYTE_PROLIFERATION	GOBP_NEGATIVE_REGULATION_OF_LEUKOCYTE_PROLIFERATION	79	0.520171	1.35704	0.121212	0.304413	1	2560	tags=42%, list=17%, signal=50%
GOBP_POSITIVE_REGULATION_OF_TYPE_I_INTERFERON_PRODUCTION	GOBP_POSITIVE_REGULATION_OF_TYPE_I_INTERFERON_PRODUCTION	73	0.345411	1.35698	0.182879	0.304243	1	4002	tags=30%, list=26%, signal=41%
GOBP_REGULATION_OF_CELL_MIGRATION_INVOLVED_IN_SPROUTING_ANGIOGENESIS	GOBP_REGULATION_OF_CELL_MIGRATION_INVOLVED_IN_SPROUTING_ANGIOGENESIS	36	0.499448	1.35643	0.138132	0.304892	1	3916	tags=42%, list=25%, signal=56%
GOBP_REGULATION_OF_MUSCLE_HYPERTROPHY	GOBP_REGULATION_OF_MUSCLE_HYPERTROPHY	53	0.429346	1.35552	0.10338	0.306185	1	3174	tags=30%, list=21%, signal=38%
GOBP_CELL_PROLIFERATION_INVOLVED_IN_KIDNEY_DEVELOPMENT	GOBP_CELL_PROLIFERATION_INVOLVED_IN_KIDNEY_DEVELOPMENT	20	0.587661	1.35514	0.0875486	0.306577	1	3076	tags=55%, list=20%, signal=69%
GOBP_REGULATION_OF_INTRACELLULAR_PROTEIN_TRANSPORT	GOBP_REGULATION_OF_INTRACELLULAR_PROTEIN_TRANSPORT	221	0.273175	1.35465	0.0779221	0.307105	1	3375	tags=20%, list=22%, signal=26%
GOMF_PHOSPHATASE_ACTIVITY	GOMF_PHOSPHATASE_ACTIVITY	233	0.29817	1.35459	0.0390625	0.306956	1	2572	tags=19%, list=17%, signal=22%
GOBP_ENDOCYTIC_RECYCLING	GOBP_ENDOCYTIC_RECYCLING	44	0.335658	1.35409	0.151575	0.307499	1	5672	tags=43%, list=37%, signal=68%
GOMF_LIGAND_ACTIVATED_TRANSCRIPTION_FACTOR_ACTIVITY	GOMF_LIGAND_ACTIVATED_TRANSCRIPTION_FACTOR_ACTIVITY	49	0.499515	1.35391	0.0889328	0.307522	1	3916	tags=45%, list=25%, signal=60%
GOBP_POSITIVE_REGULATION_OF_BLOOD_CIRCULATION	GOBP_POSITIVE_REGULATION_OF_BLOOD_CIRCULATION	37	0.536913	1.35353	0.0677966	0.307873	1	1870	tags=30%, list=12%, signal=34%
GOBP_RESPONSE_TO_TYPE_I_INTERFERON	GOBP_RESPONSE_TO_TYPE_I_INTERFERON	91	0.436875	1.35318	0.165669	0.30821	1	4942	tags=49%, list=32%, signal=72%
GOBP_ASPARTATE_FAMILY_AMINO_ACID_CATABOLIC_PROCESS	GOBP_ASPARTATE_FAMILY_AMINO_ACID_CATABOLIC_PROCESS	18	0.607995	1.35285	0.09375	0.308529	1	1416	tags=33%, list=9%, signal=37%
GOBP_REGULATION_OF_PEPTIDYL_SERINE_PHOSPHORYLATION	GOBP_REGULATION_OF_PEPTIDYL_SERINE_PHOSPHORYLATION	128	0.382113	1.35222	0.0590551	0.309408	1	4329	tags=37%, list=28%, signal=51%
GOBP_POSITIVE_REGULATION_OF_TRANSPORTER_ACTIVITY	GOBP_POSITIVE_REGULATION_OF_TRANSPORTER_ACTIVITY	96	0.451891	1.35203	0.0398406	0.309473	1	2051	tags=27%, list=13%, signal=31%
GOBP_NEGATIVE_REGULATION_OF_LYMPHOCYTE_APOPTOTIC_PROCESS	GOBP_NEGATIVE_REGULATION_OF_LYMPHOCYTE_APOPTOTIC_PROCESS	29	0.506246	1.35203	0.106426	0.309223	1	2125	tags=31%, list=14%, signal=36%
GOBP_NEGATIVE_REGULATION_OF_BMP_SIGNALING_PATHWAY	GOBP_NEGATIVE_REGULATION_OF_BMP_SIGNALING_PATHWAY	44	0.503474	1.3519	0.0797665	0.309142	1	2658	tags=25%, list=17%, signal=30%
GOBP_BRANCHED_CHAIN_AMINO_ACID_METABOLIC_PROCESS	GOBP_BRANCHED_CHAIN_AMINO_ACID_METABOLIC_PROCESS	23	0.460401	1.35172	0.144958	0.309169	1	2329	tags=22%, list=15%, signal=26%
GOMF_METALLOAMINOPEPTIDASE_ACTIVITY	GOMF_METALLOAMINOPEPTIDASE_ACTIVITY	24	0.48413	1.35148	0.130693	0.309303	1	2209	tags=25%, list=14%, signal=29%
GOBP_RAB_PROTEIN_SIGNAL_TRANSDUCTION	GOBP_RAB_PROTEIN_SIGNAL_TRANSDUCTION	19	0.482068	1.35129	0.170588	0.309363	1	2551	tags=32%, list=17%, signal=38%
GOBP_MODIFIED_AMINO_ACID_TRANSPORT	GOBP_MODIFIED_AMINO_ACID_TRANSPORT	27	0.515717	1.35085	0.0986717	0.309844	1	1117	tags=22%, list=7%, signal=24%
GOBP_TISSUE_HOMEOSTASIS	GOBP_TISSUE_HOMEOSTASIS	236	0.406453	1.34988	0.0566038	0.311131	1	2656	tags=30%, list=17%, signal=36%
GOBP_EPITHELIAL_CELL_APOPTOTIC_PROCESS	GOBP_EPITHELIAL_CELL_APOPTOTIC_PROCESS	99	0.431773	1.34978	0.0891841	0.311033	1	3346	tags=37%, list=22%, signal=47%
GOBP_RENAL_SYSTEM_PROCESS	GOBP_RENAL_SYSTEM_PROCESS	109	0.440408	1.3497	0.0511811	0.310907	1	3109	tags=33%, list=20%, signal=41%
GOBP_REGULATION_OF_MICROGLIAL_CELL_ACTIVATION	GOBP_REGULATION_OF_MICROGLIAL_CELL_ACTIVATION	15	0.652466	1.34962	0.120459	0.310771	1	3205	tags=67%, list=21%, signal=84%
GOBP_MEMBRANE_PROTEIN_ECTODOMAIN_PROTEOLYSIS	GOBP_MEMBRANE_PROTEIN_ECTODOMAIN_PROTEOLYSIS	41	0.442253	1.34932	0.133065	0.311039	1	3506	tags=34%, list=23%, signal=44%
GOMF_MRNA_3_UTR_AU_RICH_REGION_BINDING	GOMF_MRNA_3_UTR_AU_RICH_REGION_BINDING	24	0.466894	1.34905	0.132812	0.311193	1	3117	tags=29%, list=20%, signal=37%
GOBP_REGULATION_OF_VOLTAGE_GATED_CALCIUM_CHANNEL_ACTIVITY	GOBP_REGULATION_OF_VOLTAGE_GATED_CALCIUM_CHANNEL_ACTIVITY	30	0.499434	1.34898	0.0673267	0.311054	1	2278	tags=33%, list=15%, signal=39%
GOBP_CELL_RECOGNITION	GOBP_CELL_RECOGNITION	144	0.445354	1.34858	0.0359281	0.311454	1	2527	tags=33%, list=16%, signal=39%
GOBP_CELLULAR_RESPONSE_TO_ATP	GOBP_CELLULAR_RESPONSE_TO_ATP	15	0.556216	1.34773	0.106931	0.312631	1	1049	tags=20%, list=7%, signal=21%
GOBP_NEGATIVE_REGULATION_OF_B_CELL_PROLIFERATION	GOBP_NEGATIVE_REGULATION_OF_B_CELL_PROLIFERATION	17	0.628807	1.34769	0.143737	0.312417	1	3199	tags=59%, list=21%, signal=74%
GOBP_REGULATION_OF_RESPONSE_TO_INTERFERON_GAMMA	GOBP_REGULATION_OF_RESPONSE_TO_INTERFERON_GAMMA	23	0.51521	1.34748	0.154562	0.312523	1	5056	tags=57%, list=33%, signal=84%
GOBP_CELLULAR_RESPONSE_TO_INTERFERON_BETA	GOBP_CELLULAR_RESPONSE_TO_INTERFERON_BETA	18	0.552416	1.34739	0.156863	0.312386	1	3406	tags=39%, list=22%, signal=50%
GOBP_POSITIVE_REGULATION_OF_CARBOHYDRATE_METABOLIC_PROCESS	GOBP_POSITIVE_REGULATION_OF_CARBOHYDRATE_METABOLIC_PROCESS	70	0.421518	1.34695	0.0585938	0.312821	1	1454	tags=19%, list=9%, signal=20%
GOBP_HUMORAL_IMMUNE_RESPONSE_MEDIATED_BY_CIRCULATING_IMMUNOGLOBULIN	GOBP_HUMORAL_IMMUNE_RESPONSE_MEDIATED_BY_CIRCULATING_IMMUNOGLOBULIN	44	0.550366	1.34649	0.0992063	0.313304	1	2629	tags=48%, list=17%, signal=57%
GOBP_NEURON_DEATH	GOBP_NEURON_DEATH	308	0.348307	1.34647	0.0301811	0.313083	1	3416	tags=30%, list=22%, signal=37%
GOMF_ACTIN_DEPENDENT_ATPASE_ACTIVITY	GOMF_ACTIN_DEPENDENT_ATPASE_ACTIVITY	23	0.478709	1.34637	0.11546	0.313004	1	3929	tags=39%, list=26%, signal=53%
GOBP_REGULATION_OF_FEEDING_BEHAVIOR	GOBP_REGULATION_OF_FEEDING_BEHAVIOR	22	0.529997	1.34636	0.0885312	0.312762	1	1976	tags=32%, list=13%, signal=36%
GOBP_PROTEIN_PALMITOYLATION	GOBP_PROTEIN_PALMITOYLATION	31	0.427322	1.34597	0.102204	0.313197	1	633	tags=10%, list=4%, signal=10%
GOBP_ACTIN_NUCLEATION	GOBP_ACTIN_NUCLEATION	44	0.381132	1.34588	0.121807	0.313106	1	2818	tags=25%, list=18%, signal=31%
GOBP_POSITIVE_REGULATION_OF_PROTEIN_KINASE_ACTIVITY	GOBP_POSITIVE_REGULATION_OF_PROTEIN_KINASE_ACTIVITY	482	0.349658	1.34585	0.0347648	0.312897	1	3375	tags=29%, list=22%, signal=36%
GOBP_REGULATION_OF_BEHAVIOR	GOBP_REGULATION_OF_BEHAVIOR	58	0.459894	1.34571	0.0381679	0.312882	1	1976	tags=26%, list=13%, signal=30%
GOBP_CELLULAR_RESPONSE_TO_ORGANIC_CYCLIC_COMPOUND	GOBP_CELLULAR_RESPONSE_TO_ORGANIC_CYCLIC_COMPOUND	496	0.354507	1.34571	0.0376984	0.312629	1	3180	tags=26%, list=21%, signal=31%
GOMF_PHOSPHATIDYLINOSITOL_BISPHOSPHATE_PHOSPHATASE_ACTIVITY	GOMF_PHOSPHATIDYLINOSITOL_BISPHOSPHATE_PHOSPHATASE_ACTIVITY	21	0.391841	1.34499	0.144531	0.313583	1	4627	tags=57%, list=30%, signal=82%
GOMF_TRANSFERASE_ACTIVITY_TRANSFERRING_ALKYL_OR_ARYL_OTHER_THAN_METHYL_GROUPS	GOMF_TRANSFERASE_ACTIVITY_TRANSFERRING_ALKYL_OR_ARYL_OTHER_THAN_METHYL_GROUPS	48	0.353285	1.34496	0.155378	0.313378	1	1437	tags=10%, list=9%, signal=11%
GOBP_REGULATION_OF_ORGANELLE_ASSEMBLY	GOBP_REGULATION_OF_ORGANELLE_ASSEMBLY	169	0.289036	1.34491	0.0855397	0.313208	1	3472	tags=23%, list=23%, signal=29%
GOBP_GMP_METABOLIC_PROCESS	GOBP_GMP_METABOLIC_PROCESS	15	0.509007	1.34476	0.115234	0.313192	1	3083	tags=33%, list=20%, signal=42%
GOMF_SPHINGOLIPID_BINDING	GOMF_SPHINGOLIPID_BINDING	24	0.486907	1.34472	0.0982659	0.313009	1	1463	tags=25%, list=10%, signal=28%
GOBP_RESPONSE_TO_OXYGEN_RADICAL	GOBP_RESPONSE_TO_OXYGEN_RADICAL	24	0.441283	1.34461	0.148073	0.312913	1	2686	tags=25%, list=17%, signal=30%
GOBP_ACTIN_FILAMENT_DEPOLYMERIZATION	GOBP_ACTIN_FILAMENT_DEPOLYMERIZATION	50	0.444128	1.34453	0.114458	0.312784	1	4653	tags=52%, list=30%, signal=74%
GOBP_SODIUM_ION_TRANSMEMBRANE_TRANSPORT	GOBP_SODIUM_ION_TRANSMEMBRANE_TRANSPORT	158	0.438799	1.34412	0.0412574	0.313247	1	3645	tags=39%, list=24%, signal=50%
GOBP_REGULATION_OF_POTASSIUM_ION_TRANSPORT	GOBP_REGULATION_OF_POTASSIUM_ION_TRANSPORT	88	0.477397	1.34379	0.0632184	0.313534	1	1975	tags=31%, list=13%, signal=35%
GOBP_NEGATIVE_REGULATION_OF_SMALL_MOLECULE_METABOLIC_PROCESS	GOBP_NEGATIVE_REGULATION_OF_SMALL_MOLECULE_METABOLIC_PROCESS	82	0.404387	1.34371	0.0664062	0.313432	1	3785	tags=32%, list=25%, signal=42%
GOBP_MYELOID_CELL_HOMEOSTASIS	GOBP_MYELOID_CELL_HOMEOSTASIS	131	0.326309	1.34353	0.128107	0.313472	1	3117	tags=24%, list=20%, signal=30%
GOMF_DRUG_BINDING	GOMF_DRUG_BINDING	52	0.415631	1.34345	0.0817121	0.313329	1	736	tags=13%, list=5%, signal=14%
GOBP_SOMATIC_DIVERSIFICATION_OF_IMMUNOGLOBULINS	GOBP_SOMATIC_DIVERSIFICATION_OF_IMMUNOGLOBULINS	52	0.44531	1.34315	0.16996	0.313592	1	1299	tags=17%, list=8%, signal=19%
GOBP_NEGATIVE_REGULATION_OF_CELL_CELL_ADHESION	GOBP_NEGATIVE_REGULATION_OF_CELL_CELL_ADHESION	161	0.430701	1.34306	0.126953	0.313484	1	2587	tags=30%, list=17%, signal=35%
GOCC_CALCIUM_CHANNEL_COMPLEX	GOCC_CALCIUM_CHANNEL_COMPLEX	57	0.483397	1.34302	0.0642023	0.313282	1	3025	tags=33%, list=20%, signal=41%
GOBP_NEUROMUSCULAR_SYNAPTIC_TRANSMISSION	GOBP_NEUROMUSCULAR_SYNAPTIC_TRANSMISSION	24	0.517999	1.34288	0.108108	0.313258	1	3471	tags=46%, list=23%, signal=59%
GOBP_REGULATION_OF_CARDIAC_CONDUCTION	GOBP_REGULATION_OF_CARDIAC_CONDUCTION	54	0.505949	1.34276	0.0871287	0.313224	1	2192	tags=28%, list=14%, signal=32%
GOBP_TOLL_LIKE_RECEPTOR_4_SIGNALING_PATHWAY	GOBP_TOLL_LIKE_RECEPTOR_4_SIGNALING_PATHWAY	34	0.510244	1.34201	0.134503	0.314171	1	2453	tags=35%, list=16%, signal=42%
GOBP_MATURE_B_CELL_DIFFERENTIATION	GOBP_MATURE_B_CELL_DIFFERENTIATION	31	0.553011	1.34128	0.165703	0.31509	1	3710	tags=55%, list=24%, signal=72%
GOBP_REGULATION_OF_INNATE_IMMUNE_RESPONSE	GOBP_REGULATION_OF_INNATE_IMMUNE_RESPONSE	281	0.403047	1.34124	0.166667	0.314884	1	3406	tags=31%, list=22%, signal=39%
GOBP_REGULATION_OF_HYDROGEN_PEROXIDE_METABOLIC_PROCESS	GOBP_REGULATION_OF_HYDROGEN_PEROXIDE_METABOLIC_PROCESS	17	0.518464	1.34124	0.127451	0.314633	1	1661	tags=24%, list=11%, signal=26%
GOBP_NEUTROPHIL_CHEMOTAXIS	GOBP_NEUTROPHIL_CHEMOTAXIS	83	0.535386	1.34094	0.118421	0.314878	1	2964	tags=42%, list=19%, signal=52%
GOBP_NEGATIVE_REGULATION_OF_CELL_ADHESION	GOBP_NEGATIVE_REGULATION_OF_CELL_ADHESION	254	0.404425	1.34015	0.120459	0.315956	1	3992	tags=39%, list=26%, signal=52%
GOBP_POSITIVE_REGULATION_OF_LIPID_METABOLIC_PROCESS	GOBP_POSITIVE_REGULATION_OF_LIPID_METABOLIC_PROCESS	137	0.423287	1.34014	0.0584795	0.315723	1	2934	tags=31%, list=19%, signal=38%
GOBP_LYMPH_VESSEL_DEVELOPMENT	GOBP_LYMPH_VESSEL_DEVELOPMENT	26	0.544338	1.33983	0.162427	0.315986	1	3511	tags=46%, list=23%, signal=60%
GOBP_NEGATIVE_REGULATION_OF_TRANSFERASE_ACTIVITY	GOBP_NEGATIVE_REGULATION_OF_TRANSFERASE_ACTIVITY	256	0.322204	1.33966	0.0598456	0.315992	1	3230	tags=26%, list=21%, signal=33%
GOBP_MYELOID_LEUKOCYTE_CYTOKINE_PRODUCTION	GOBP_MYELOID_LEUKOCYTE_CYTOKINE_PRODUCTION	26	0.500562	1.33959	0.125237	0.315856	1	3375	tags=35%, list=22%, signal=44%
GOBP_NEGATIVE_REGULATION_OF_TRANSPORTER_ACTIVITY	GOBP_NEGATIVE_REGULATION_OF_TRANSPORTER_ACTIVITY	67	0.469423	1.33955	0.0836576	0.315675	1	1648	tags=24%, list=11%, signal=27%
GOBP_POSITIVE_REGULATION_OF_CYTOSOLIC_CALCIUM_ION_CONCENTRATION_INVOLVED_IN_PHOSPHOLIPASE_C_ACTIVATING_G_PROTEIN_COUPLED_SIGNALING_PATHWAY	GOBP_POSITIVE_REGULATION_OF_CYTOSOLIC_CALCIUM_ION_CONCENTRATION_INVOLVED_IN_PHOSPHOLIPASE_C_ACTIVATING_G_PROTEIN_COUPLED_SIGNALING_PATHWAY	32	0.548048	1.33915	0.0984556	0.316101	1	2249	tags=38%, list=15%, signal=44%
GOBP_REGULATION_OF_ANION_TRANSMEMBRANE_TRANSPORT	GOBP_REGULATION_OF_ANION_TRANSMEMBRANE_TRANSPORT	96	0.401479	1.33911	0.073501	0.315887	1	3809	tags=36%, list=25%, signal=48%
GOCC_FIBRILLAR_CENTER	GOCC_FIBRILLAR_CENTER	128	0.278814	1.33901	0.0665281	0.315773	1	1679	tags=11%, list=11%, signal=12%
GOBP_REGULATION_OF_JUN_KINASE_ACTIVITY	GOBP_REGULATION_OF_JUN_KINASE_ACTIVITY	79	0.396322	1.33891	0.106557	0.315669	1	3136	tags=28%, list=20%, signal=35%
GOBP_NEGATIVE_REGULATION_OF_DNA_BINDING_TRANSCRIPTION_FACTOR_ACTIVITY	GOBP_NEGATIVE_REGULATION_OF_DNA_BINDING_TRANSCRIPTION_FACTOR_ACTIVITY	146	0.355152	1.33845	0.0877863	0.31619	1	3927	tags=36%, list=26%, signal=47%
GOBP_CELLULAR_RESPONSE_TO_VASCULAR_ENDOTHELIAL_GROWTH_FACTOR_STIMULUS	GOBP_CELLULAR_RESPONSE_TO_VASCULAR_ENDOTHELIAL_GROWTH_FACTOR_STIMULUS	57	0.470578	1.33807	0.145631	0.316568	1	3112	tags=32%, list=20%, signal=39%
GOBP_GLYCOSPHINGOLIPID_METABOLIC_PROCESS	GOBP_GLYCOSPHINGOLIPID_METABOLIC_PROCESS	60	0.394207	1.3377	0.0820312	0.316959	1	4421	tags=35%, list=29%, signal=49%
GOBP_REGULATION_OF_VASCULAR_ENDOTHELIAL_GROWTH_FACTOR_RECEPTOR_SIGNALING_PATHWAY	GOBP_REGULATION_OF_VASCULAR_ENDOTHELIAL_GROWTH_FACTOR_RECEPTOR_SIGNALING_PATHWAY	25	0.503201	1.33713	0.138402	0.31766	1	3754	tags=44%, list=24%, signal=58%
GOBP_LONG_CHAIN_FATTY_ACID_TRANSPORT	GOBP_LONG_CHAIN_FATTY_ACID_TRANSPORT	66	0.457509	1.33709	0.0853175	0.317469	1	2920	tags=38%, list=19%, signal=47%
GOBP_CELLULAR_RESPONSE_TO_STEROID_HORMONE_STIMULUS	GOBP_CELLULAR_RESPONSE_TO_STEROID_HORMONE_STIMULUS	180	0.35638	1.33661	0.0540541	0.317993	1	2203	tags=18%, list=14%, signal=21%
GOBP_REGULATION_OF_CILIUM_ASSEMBLY	GOBP_REGULATION_OF_CILIUM_ASSEMBLY	50	0.411288	1.33637	0.15275	0.318151	1	3661	tags=34%, list=24%, signal=44%
GOBP_NEGATIVE_REGULATION_OF_INTRACELLULAR_PROTEIN_TRANSPORT	GOBP_NEGATIVE_REGULATION_OF_INTRACELLULAR_PROTEIN_TRANSPORT	37	0.415265	1.33584	0.131021	0.318744	1	748	tags=11%, list=5%, signal=11%
GOBP_VENTRICULAR_SEPTUM_MORPHOGENESIS	GOBP_VENTRICULAR_SEPTUM_MORPHOGENESIS	34	0.544089	1.33581	0.159363	0.318531	1	3511	tags=44%, list=23%, signal=57%
GOBP_REGULATION_OF_RUFFLE_ASSEMBLY	GOBP_REGULATION_OF_RUFFLE_ASSEMBLY	26	0.46315	1.3357	0.138554	0.31847	1	3725	tags=46%, list=24%, signal=61%
GOBP_POSITIVE_REGULATION_OF_VASCULATURE_DEVELOPMENT	GOBP_POSITIVE_REGULATION_OF_VASCULATURE_DEVELOPMENT	137	0.460329	1.33549	0.10687	0.318585	1	3513	tags=44%, list=23%, signal=56%
GOMF_TRANSLATION_REPRESSOR_ACTIVITY	GOMF_TRANSLATION_REPRESSOR_ACTIVITY	23	0.468095	1.33474	0.123711	0.319536	1	2940	tags=35%, list=19%, signal=43%
GOBP_NEGATIVE_REGULATION_OF_KINASE_ACTIVITY	GOBP_NEGATIVE_REGULATION_OF_KINASE_ACTIVITY	229	0.332717	1.33473	0.0704501	0.319294	1	3230	tags=27%, list=21%, signal=34%
GOBP_REGULATION_OF_PROTEASOMAL_PROTEIN_CATABOLIC_PROCESS	GOBP_REGULATION_OF_PROTEASOMAL_PROTEIN_CATABOLIC_PROCESS	159	0.239863	1.33469	0.091954	0.3191	1	2017	tags=11%, list=13%, signal=13%
GOMF_CYSTEINE_TYPE_ENDOPEPTIDASE_INHIBITOR_ACTIVITY_INVOLVED_IN_APOPTOTIC_PROCESS	GOMF_CYSTEINE_TYPE_ENDOPEPTIDASE_INHIBITOR_ACTIVITY_INVOLVED_IN_APOPTOTIC_PROCESS	21	0.490406	1.33451	0.143137	0.319108	1	2954	tags=52%, list=19%, signal=65%
GOBP_DETECTION_OF_BIOTIC_STIMULUS	GOBP_DETECTION_OF_BIOTIC_STIMULUS	32	0.544899	1.33449	0.138554	0.318901	1	2200	tags=38%, list=14%, signal=44%
GOBP_POSITIVE_REGULATION_OF_BEHAVIOR	GOBP_POSITIVE_REGULATION_OF_BEHAVIOR	22	0.530152	1.33434	0.0941423	0.318875	1	1976	tags=32%, list=13%, signal=36%
GOBP_REGULATION_OF_VIRAL_GENOME_REPLICATION	GOBP_REGULATION_OF_VIRAL_GENOME_REPLICATION	73	0.40756	1.33428	0.145194	0.318709	1	2593	tags=26%, list=17%, signal=31%
GOBP_NEGATIVE_REGULATION_OF_POTASSIUM_ION_TRANSPORT	GOBP_NEGATIVE_REGULATION_OF_POTASSIUM_ION_TRANSPORT	28	0.58014	1.33406	0.111111	0.318823	1	1548	tags=32%, list=10%, signal=36%
GOBP_REGULATION_OF_CYTOSKELETON_ORGANIZATION	GOBP_REGULATION_OF_CYTOSKELETON_ORGANIZATION	460	0.326512	1.33393	0.0726577	0.318767	1	3532	tags=29%, list=23%, signal=37%
GOBP_CELL_COMMUNICATION_BY_ELECTRICAL_COUPLING_INVOLVED_IN_CARDIAC_CONDUCTION	GOBP_CELL_COMMUNICATION_BY_ELECTRICAL_COUPLING_INVOLVED_IN_CARDIAC_CONDUCTION	23	0.573546	1.33371	0.128906	0.318888	1	3941	tags=57%, list=26%, signal=76%
GOBP_CALCIUM_MEDIATED_SIGNALING_USING_INTRACELLULAR_CALCIUM_SOURCE	GOBP_CALCIUM_MEDIATED_SIGNALING_USING_INTRACELLULAR_CALCIUM_SOURCE	19	0.561389	1.33366	0.105477	0.318727	1	1253	tags=32%, list=8%, signal=34%
GOBP_MUSCLE_CONTRACTION	GOBP_MUSCLE_CONTRACTION	323	0.436919	1.33332	0.072407	0.319038	1	2998	tags=31%, list=20%, signal=37%
GOBP_AXONEMAL_DYNEIN_COMPLEX_ASSEMBLY	GOBP_AXONEMAL_DYNEIN_COMPLEX_ASSEMBLY	18	0.758271	1.33331	0.15102	0.318818	1	2373	tags=67%, list=15%, signal=79%
GOBP_REGULATION_OF_INSULIN_RECEPTOR_SIGNALING_PATHWAY	GOBP_REGULATION_OF_INSULIN_RECEPTOR_SIGNALING_PATHWAY	59	0.362865	1.33319	0.0745455	0.318767	1	3078	tags=29%, list=20%, signal=36%
GOBP_OLFACTORY_LOBE_DEVELOPMENT	GOBP_OLFACTORY_LOBE_DEVELOPMENT	26	0.525533	1.33302	0.104331	0.318789	1	412	tags=19%, list=3%, signal=20%
GOCC_MICROBODY_LUMEN	GOCC_MICROBODY_LUMEN	49	0.417454	1.33293	0.122288	0.318683	1	4284	tags=35%, list=28%, signal=48%
GOBP_RENAL_SYSTEM_PROCESS_INVOLVED_IN_REGULATION_OF_SYSTEMIC_ARTERIAL_BLOOD_PRESSURE	GOBP_RENAL_SYSTEM_PROCESS_INVOLVED_IN_REGULATION_OF_SYSTEMIC_ARTERIAL_BLOOD_PRESSURE	23	0.590945	1.33274	0.0953347	0.318763	1	3546	tags=57%, list=23%, signal=73%
GOBP_PHOSPHOLIPID_TRANSPORT	GOBP_PHOSPHOLIPID_TRANSPORT	82	0.405318	1.33262	0.063745	0.318723	1	2836	tags=32%, list=18%, signal=39%
GOMF_VOLTAGE_GATED_ION_CHANNEL_ACTIVITY	GOMF_VOLTAGE_GATED_ION_CHANNEL_ACTIVITY	183	0.442132	1.33253	0.037037	0.318606	1	2765	tags=29%, list=18%, signal=35%
GOBP_REGULATION_OF_VASCULOGENESIS	GOBP_REGULATION_OF_VASCULOGENESIS	16	0.572068	1.33199	0.137374	0.319221	1	3785	tags=56%, list=25%, signal=75%
GOMF_SIALYLTRANSFERASE_ACTIVITY	GOMF_SIALYLTRANSFERASE_ACTIVITY	20	0.548141	1.33166	0.0992218	0.319538	1	1746	tags=35%, list=11%, signal=39%
GOBP_INOSITOL_PHOSPHATE_BIOSYNTHETIC_PROCESS	GOBP_INOSITOL_PHOSPHATE_BIOSYNTHETIC_PROCESS	26	0.522798	1.33159	0.114398	0.319416	1	3017	tags=42%, list=20%, signal=53%
GOMF_DEACETYLASE_ACTIVITY	GOMF_DEACETYLASE_ACTIVITY	34	0.359652	1.33157	0.145455	0.319196	1	5678	tags=50%, list=37%, signal=79%
GOBP_COPULATION	GOBP_COPULATION	19	0.613827	1.33143	0.0903733	0.319173	1	1049	tags=37%, list=7%, signal=39%
GOBP_POSITIVE_REGULATION_OF_IMMUNOGLOBULIN_PRODUCTION	GOBP_POSITIVE_REGULATION_OF_IMMUNOGLOBULIN_PRODUCTION	36	0.530498	1.33116	0.140115	0.319403	1	3375	tags=39%, list=22%, signal=50%
GOBP_GUANOSINE_CONTAINING_COMPOUND_METABOLIC_PROCESS	GOBP_GUANOSINE_CONTAINING_COMPOUND_METABOLIC_PROCESS	36	0.392185	1.33012	0.134269	0.320851	1	2391	tags=22%, list=16%, signal=26%
GOBP_REGULATION_OF_PROTEIN_LOCALIZATION_TO_MEMBRANE	GOBP_REGULATION_OF_PROTEIN_LOCALIZATION_TO_MEMBRANE	172	0.318947	1.33003	0.0644531	0.320728	1	3375	tags=26%, list=22%, signal=32%
GOBP_PEROXISOME_PROLIFERATOR_ACTIVATED_RECEPTOR_SIGNALING_PATHWAY	GOBP_PEROXISOME_PROLIFERATOR_ACTIVATED_RECEPTOR_SIGNALING_PATHWAY	20	0.527384	1.32951	0.117188	0.32136	1	2920	tags=40%, list=19%, signal=49%
GOBP_NEGATIVE_REGULATION_OF_CALCIUM_ION_TRANSPORT	GOBP_NEGATIVE_REGULATION_OF_CALCIUM_ION_TRANSPORT	50	0.474986	1.32945	0.0957854	0.321198	1	1984	tags=26%, list=13%, signal=30%
GOBP_NEGATIVE_REGULATION_OF_PHOSPHORYLATION	GOBP_NEGATIVE_REGULATION_OF_PHOSPHORYLATION	350	0.335519	1.32941	0.0626223	0.321	1	2905	tags=26%, list=19%, signal=32%
GOBP_POST_GOLGI_VESICLE_MEDIATED_TRANSPORT	GOBP_POST_GOLGI_VESICLE_MEDIATED_TRANSPORT	97	0.260287	1.32925	0.159393	0.321029	1	5433	tags=37%, list=35%, signal=57%
GOMF_CALMODULIN_DEPENDENT_PROTEIN_KINASE_ACTIVITY	GOMF_CALMODULIN_DEPENDENT_PROTEIN_KINASE_ACTIVITY	27	0.42462	1.32905	0.130802	0.321087	1	3209	tags=37%, list=21%, signal=47%
GOCC_SPERM_MIDPIECE	GOCC_SPERM_MIDPIECE	23	0.549325	1.32887	0.106589	0.321134	1	2029	tags=30%, list=13%, signal=35%
GOBP_NEGATIVE_REGULATION_OF_VIRAL_PROCESS	GOBP_NEGATIVE_REGULATION_OF_VIRAL_PROCESS	79	0.418458	1.32873	0.136095	0.321133	1	3622	tags=37%, list=24%, signal=48%
GOBP_RECEPTOR_INTERNALIZATION	GOBP_RECEPTOR_INTERNALIZATION	103	0.412942	1.32867	0.0914397	0.320973	1	4026	tags=38%, list=26%, signal=51%
GOBP_POSITIVE_REGULATION_OF_COLD_INDUCED_THERMOGENESIS	GOBP_POSITIVE_REGULATION_OF_COLD_INDUCED_THERMOGENESIS	95	0.41571	1.32843	0.0606654	0.321138	1	3241	tags=33%, list=21%, signal=41%
GOBP_POSITIVE_REGULATION_OF_RECEPTOR_SIGNALING_PATHWAY_VIA_STAT	GOBP_POSITIVE_REGULATION_OF_RECEPTOR_SIGNALING_PATHWAY_VIA_STAT	43	0.500665	1.32837	0.0898662	0.320997	1	2401	tags=33%, list=16%, signal=38%
GOBP_NEGATIVE_REGULATION_OF_T_CELL_RECEPTOR_SIGNALING_PATHWAY	GOBP_NEGATIVE_REGULATION_OF_T_CELL_RECEPTOR_SIGNALING_PATHWAY	22	0.599336	1.328	0.191321	0.321385	1	3945	tags=59%, list=26%, signal=79%
GOBP_GLYCEROPHOSPHOLIPID_CATABOLIC_PROCESS	GOBP_GLYCEROPHOSPHOLIPID_CATABOLIC_PROCESS	28	0.505543	1.32787	0.107216	0.321372	1	4854	tags=61%, list=32%, signal=89%
GOBP_SCHWANN_CELL_DIFFERENTIATION	GOBP_SCHWANN_CELL_DIFFERENTIATION	33	0.445607	1.32783	0.116832	0.321196	1	1443	tags=18%, list=9%, signal=20%
GOBP_COMPLEMENT_ACTIVATION_ALTERNATIVE_PATHWAY	GOBP_COMPLEMENT_ACTIVATION_ALTERNATIVE_PATHWAY	16	0.661227	1.32737	0.10998	0.321725	1	2629	tags=69%, list=17%, signal=83%
GOBP_PHOSPHATIDYLCHOLINE_ACYL_CHAIN_REMODELING	GOBP_PHOSPHATIDYLCHOLINE_ACYL_CHAIN_REMODELING	27	0.522881	1.32649	0.11306	0.322971	1	4237	tags=56%, list=28%, signal=77%
GOBP_REGULATION_OF_CARBOHYDRATE_METABOLIC_PROCESS	GOBP_REGULATION_OF_CARBOHYDRATE_METABOLIC_PROCESS	183	0.308891	1.32573	0.0589354	0.323982	1	2110	tags=15%, list=14%, signal=17%
GOBP_NEGATIVE_REGULATION_OF_FATTY_ACID_METABOLIC_PROCESS	GOBP_NEGATIVE_REGULATION_OF_FATTY_ACID_METABOLIC_PROCESS	26	0.451835	1.32565	0.14053	0.32389	1	1853	tags=23%, list=12%, signal=26%
GOBP_NEGATIVE_REGULATION_OF_CELL_SUBSTRATE_JUNCTION_ORGANIZATION	GOBP_NEGATIVE_REGULATION_OF_CELL_SUBSTRATE_JUNCTION_ORGANIZATION	17	0.527668	1.32546	0.203557	0.323933	1	4738	tags=59%, list=31%, signal=85%
GOBP_REGULATION_OF_ARP2_3_COMPLEX_MEDIATED_ACTIN_NUCLEATION	GOBP_REGULATION_OF_ARP2_3_COMPLEX_MEDIATED_ACTIN_NUCLEATION	19	0.4149	1.3254	0.167308	0.32376	1	2514	tags=21%, list=16%, signal=25%
GOBP_POSITIVE_REGULATION_OF_HEART_GROWTH	GOBP_POSITIVE_REGULATION_OF_HEART_GROWTH	33	0.528116	1.32529	0.136187	0.323736	1	2352	tags=36%, list=15%, signal=43%
GOBP_RECEPTOR_RECYCLING	GOBP_RECEPTOR_RECYCLING	27	0.424445	1.32526	0.130268	0.323526	1	827	tags=11%, list=5%, signal=12%
GOBP_POSITIVE_REGULATION_OF_HUMORAL_IMMUNE_RESPONSE	GOBP_POSITIVE_REGULATION_OF_HUMORAL_IMMUNE_RESPONSE	18	0.619928	1.32518	0.117764	0.323428	1	3086	tags=61%, list=20%, signal=76%
GOBP_ESTABLISHMENT_OF_PROTEIN_LOCALIZATION_TO_PLASMA_MEMBRANE	GOBP_ESTABLISHMENT_OF_PROTEIN_LOCALIZATION_TO_PLASMA_MEMBRANE	51	0.306683	1.32511	0.139442	0.323294	1	4426	tags=31%, list=29%, signal=44%
GOBP_CILIUM_OR_FLAGELLUM_DEPENDENT_CELL_MOTILITY	GOBP_CILIUM_OR_FLAGELLUM_DEPENDENT_CELL_MOTILITY	91	0.529761	1.32504	0.133891	0.323159	1	3193	tags=40%, list=21%, signal=50%
GOBP_NEGATIVE_REGULATION_OF_EPITHELIAL_TO_MESENCHYMAL_TRANSITION	GOBP_NEGATIVE_REGULATION_OF_EPITHELIAL_TO_MESENCHYMAL_TRANSITION	33	0.484718	1.32446	0.133733	0.323886	1	4227	tags=52%, list=28%, signal=71%
GOMF_G_PROTEIN_COUPLED_RECEPTOR_ACTIVITY	GOMF_G_PROTEIN_COUPLED_RECEPTOR_ACTIVITY	428	0.402391	1.32427	0.00982318	0.323941	1	2249	tags=20%, list=15%, signal=22%
GOBP_ENDOTHELIAL_CELL_MIGRATION	GOBP_ENDOTHELIAL_CELL_MIGRATION	198	0.409366	1.32377	0.121622	0.324509	1	3536	tags=36%, list=23%, signal=46%
GOBP_MACROPHAGE_ACTIVATION_INVOLVED_IN_IMMUNE_RESPONSE	GOBP_MACROPHAGE_ACTIVATION_INVOLVED_IN_IMMUNE_RESPONSE	18	0.592937	1.32365	0.136179	0.324454	1	3671	tags=67%, list=24%, signal=88%
GOBP_RELAXATION_OF_MUSCLE	GOBP_RELAXATION_OF_MUSCLE	27	0.551381	1.32357	0.105769	0.324333	1	3215	tags=48%, list=21%, signal=61%
GOCC_ANCHORED_COMPONENT_OF_PLASMA_MEMBRANE	GOCC_ANCHORED_COMPONENT_OF_PLASMA_MEMBRANE	52	0.495613	1.3227	0.0715706	0.325532	1	3944	tags=54%, list=26%, signal=72%
GOBP_SIALYLATION	GOBP_SIALYLATION	19	0.550956	1.32263	0.117083	0.325401	1	1746	tags=37%, list=11%, signal=42%
GOBP_RESPONSE_TO_PEPTIDE	GOBP_RESPONSE_TO_PEPTIDE	471	0.335472	1.32254	0.0484496	0.325269	1	3182	tags=26%, list=21%, signal=32%
GOBP_STRIATED_MUSCLE_CONTRACTION	GOBP_STRIATED_MUSCLE_CONTRACTION	159	0.435911	1.32205	0.0652174	0.325822	1	3595	tags=36%, list=23%, signal=47%
GOBP_REGULATION_OF_EPITHELIAL_CELL_DIFFERENTIATION_INVOLVED_IN_KIDNEY_DEVELOPMENT	GOBP_REGULATION_OF_EPITHELIAL_CELL_DIFFERENTIATION_INVOLVED_IN_KIDNEY_DEVELOPMENT	16	0.567651	1.32192	0.124248	0.325774	1	1757	tags=31%, list=11%, signal=35%
GOBP_RIBONUCLEOSIDE_METABOLIC_PROCESS	GOBP_RIBONUCLEOSIDE_METABOLIC_PROCESS	64	0.371708	1.32141	0.108	0.326389	1	2410	tags=23%, list=16%, signal=28%
GOCC_VACUOLAR_LUMEN	GOCC_VACUOLAR_LUMEN	155	0.368013	1.32136	0.124756	0.326221	1	4076	tags=35%, list=27%, signal=48%
GOBP_PROTEIN_POLYMERIZATION	GOBP_PROTEIN_POLYMERIZATION	258	0.334067	1.32129	0.0728972	0.326083	1	2854	tags=25%, list=19%, signal=30%
GOMF_PHOSPHORIC_ESTER_HYDROLASE_ACTIVITY	GOMF_PHOSPHORIC_ESTER_HYDROLASE_ACTIVITY	318	0.320294	1.32078	0.0525292	0.326711	1	3512	tags=29%, list=23%, signal=36%
GOBP_POSITIVE_REGULATION_OF_NITRIC_OXIDE_SYNTHASE_ACTIVITY	GOBP_POSITIVE_REGULATION_OF_NITRIC_OXIDE_SYNTHASE_ACTIVITY	22	0.462698	1.32049	0.107071	0.326974	1	1781	tags=23%, list=12%, signal=26%
GOMF_CALMODULIN_BINDING	GOMF_CALMODULIN_BINDING	192	0.361851	1.32024	0.0479042	0.327167	1	3569	tags=31%, list=23%, signal=40%
GOBP_VITAMIN_TRANSMEMBRANE_TRANSPORT	GOBP_VITAMIN_TRANSMEMBRANE_TRANSPORT	17	0.552181	1.31984	0.135397	0.327535	1	1698	tags=29%, list=11%, signal=33%
GOMF_SMAD_BINDING	GOMF_SMAD_BINDING	73	0.378342	1.31978	0.142857	0.327396	1	2790	tags=25%, list=18%, signal=30%
GOMF_GTP_DEPENDENT_PROTEIN_BINDING	GOMF_GTP_DEPENDENT_PROTEIN_BINDING	22	0.416862	1.3197	0.145161	0.327324	1	3780	tags=32%, list=25%, signal=42%
GOBP_MAINTENANCE_OF_CELL_POLARITY	GOBP_MAINTENANCE_OF_CELL_POLARITY	17	0.499677	1.31931	0.146694	0.327775	1	3437	tags=35%, list=22%, signal=45%
GOBP_DICARBOXYLIC_ACID_CATABOLIC_PROCESS	GOBP_DICARBOXYLIC_ACID_CATABOLIC_PROCESS	16	0.549553	1.31911	0.105675	0.327842	1	893	tags=19%, list=6%, signal=20%
GOBP_METAL_ION_EXPORT	GOBP_METAL_ION_EXPORT	40	0.517873	1.31895	0.110465	0.327861	1	1726	tags=30%, list=11%, signal=34%
GOBP_PROTEIN_DEGLYCOSYLATION	GOBP_PROTEIN_DEGLYCOSYLATION	26	0.384893	1.31872	0.191617	0.328046	1	4614	tags=42%, list=30%, signal=60%
GOBP_DNA_DEALKYLATION	GOBP_DNA_DEALKYLATION	31	0.436717	1.31854	0.144531	0.328073	1	2410	tags=23%, list=16%, signal=27%
GOBP_ADAPTIVE_THERMOGENESIS	GOBP_ADAPTIVE_THERMOGENESIS	149	0.383519	1.31847	0.0675676	0.327945	1	3241	tags=30%, list=21%, signal=38%
GOBP_POLYSACCHARIDE_CATABOLIC_PROCESS	GOBP_POLYSACCHARIDE_CATABOLIC_PROCESS	26	0.441623	1.31832	0.135827	0.327941	1	3896	tags=35%, list=25%, signal=46%
GOBP_REGULATION_OF_BIOLOGICAL_PROCESS_INVOLVED_IN_SYMBIOTIC_INTERACTION	GOBP_REGULATION_OF_BIOLOGICAL_PROCESS_INVOLVED_IN_SYMBIOTIC_INTERACTION	175	0.329693	1.31769	0.126706	0.328787	1	2799	tags=22%, list=18%, signal=26%
GOMF_ATP_DEPENDENT_MICROTUBULE_MOTOR_ACTIVITY_MINUS_END_DIRECTED	GOMF_ATP_DEPENDENT_MICROTUBULE_MOTOR_ACTIVITY_MINUS_END_DIRECTED	18	0.681128	1.31745	0.189723	0.328932	1	2131	tags=56%, list=14%, signal=64%
GOMF_PHOSPHATIDYLINOSITOL_BINDING	GOMF_PHOSPHATIDYLINOSITOL_BINDING	228	0.29567	1.31705	0.0701403	0.329382	1	4315	tags=31%, list=28%, signal=42%
GOMF_SOLUTE_SODIUM_SYMPORTER_ACTIVITY	GOMF_SOLUTE_SODIUM_SYMPORTER_ACTIVITY	70	0.497915	1.31685	0.0656371	0.329463	1	3982	tags=46%, list=26%, signal=61%
GOBP_CILIUM_MOVEMENT	GOBP_CILIUM_MOVEMENT	109	0.548888	1.3168	0.162272	0.329278	1	2431	tags=35%, list=16%, signal=41%
GOBP_NEGATIVE_REGULATION_OF_TRANSLATIONAL_INITIATION	GOBP_NEGATIVE_REGULATION_OF_TRANSLATIONAL_INITIATION	16	0.422841	1.31667	0.166667	0.329257	1	230	tags=6%, list=1%, signal=6%
GOBP_REGULATION_OF_STRESS_ACTIVATED_PROTEIN_KINASE_SIGNALING_CASCADE	GOBP_REGULATION_OF_STRESS_ACTIVATED_PROTEIN_KINASE_SIGNALING_CASCADE	170	0.370381	1.31657	0.0742972	0.329183	1	3136	tags=28%, list=20%, signal=35%
GOBP_EPITHELIAL_TO_MESENCHYMAL_TRANSITION_INVOLVED_IN_ENDOCARDIAL_CUSHION_FORMATION	GOBP_EPITHELIAL_TO_MESENCHYMAL_TRANSITION_INVOLVED_IN_ENDOCARDIAL_CUSHION_FORMATION	16	0.560582	1.31649	0.159176	0.329066	1	2254	tags=25%, list=15%, signal=29%
GOBP_RESPONSE_TO_MECHANICAL_STIMULUS	GOBP_RESPONSE_TO_MECHANICAL_STIMULUS	188	0.388003	1.31649	0.0658915	0.328828	1	2712	tags=31%, list=18%, signal=38%
GOMF_TRANSCRIPTION_COACTIVATOR_ACTIVITY	GOMF_TRANSCRIPTION_COACTIVATOR_ACTIVITY	240	0.232486	1.31611	0.112705	0.329142	1	4713	tags=25%, list=31%, signal=35%
GOBP_RESPONSE_TO_LEAD_ION	GOBP_RESPONSE_TO_LEAD_ION	22	0.424361	1.3152	0.173448	0.330484	1	4310	tags=45%, list=28%, signal=63%
GOBP_RIG_I_SIGNALING_PATHWAY	GOBP_RIG_I_SIGNALING_PATHWAY	22	0.385988	1.31505	0.175	0.330468	1	4729	tags=36%, list=31%, signal=52%
GOBP_SPROUTING_ANGIOGENESIS	GOBP_SPROUTING_ANGIOGENESIS	112	0.457436	1.31464	0.157495	0.330904	1	2110	tags=29%, list=14%, signal=33%
GOBP_INOSITOL_PHOSPHATE_METABOLIC_PROCESS	GOBP_INOSITOL_PHOSPHATE_METABOLIC_PROCESS	67	0.405828	1.31423	0.0990291	0.331356	1	3017	tags=34%, list=20%, signal=43%
GOCC_GOLGI_ASSOCIATED_VESICLE	GOCC_GOLGI_ASSOCIATED_VESICLE	84	0.31885	1.31413	0.129094	0.331263	1	2145	tags=11%, list=14%, signal=12%
GOBP_NEUTROPHIL_MIGRATION	GOBP_NEUTROPHIL_MIGRATION	103	0.499144	1.31407	0.113027	0.331103	1	2964	tags=40%, list=19%, signal=49%
GOBP_PYRIMIDINE_NUCLEOSIDE_CATABOLIC_PROCESS	GOBP_PYRIMIDINE_NUCLEOSIDE_CATABOLIC_PROCESS	20	0.545605	1.31357	0.121272	0.331721	1	3580	tags=55%, list=23%, signal=72%
GOMF_PROLINE_RICH_REGION_BINDING	GOMF_PROLINE_RICH_REGION_BINDING	16	0.458181	1.31334	0.183365	0.331818	1	5135	tags=44%, list=33%, signal=66%
GOBP_CELLULAR_RESPONSE_TO_VIRUS	GOBP_CELLULAR_RESPONSE_TO_VIRUS	53	0.390433	1.31315	0.163065	0.331892	1	4789	tags=34%, list=31%, signal=49%
GOBP_MEMBRANE_REPOLARIZATION	GOBP_MEMBRANE_REPOLARIZATION	39	0.551028	1.31274	0.139165	0.332338	1	1888	tags=31%, list=12%, signal=35%
GOBP_CELL_SUBSTRATE_ADHESION	GOBP_CELL_SUBSTRATE_ADHESION	334	0.39394	1.31234	0.131332	0.332751	1	3489	tags=34%, list=23%, signal=44%
GOBP_GRANULOCYTE_CHEMOTAXIS	GOBP_GRANULOCYTE_CHEMOTAXIS	103	0.502942	1.31182	0.120623	0.333367	1	3234	tags=43%, list=21%, signal=54%
GOBP_NEGATIVE_REGULATION_OF_DEVELOPMENTAL_GROWTH	GOBP_NEGATIVE_REGULATION_OF_DEVELOPMENTAL_GROWTH	95	0.440341	1.31167	0.11022	0.333369	1	3800	tags=46%, list=25%, signal=61%
GOBP_REGULATION_OF_STRIATED_MUSCLE_CONTRACTION	GOBP_REGULATION_OF_STRIATED_MUSCLE_CONTRACTION	82	0.421633	1.31161	0.0767754	0.333231	1	3350	tags=33%, list=22%, signal=42%
GOBP_CHOLESTEROL_STORAGE	GOBP_CHOLESTEROL_STORAGE	17	0.573675	1.31106	0.177515	0.333896	1	4437	tags=65%, list=29%, signal=91%
GOMF_STEROID_HORMONE_RECEPTOR_ACTIVITY	GOMF_STEROID_HORMONE_RECEPTOR_ACTIVITY	23	0.511173	1.31064	0.133056	0.334322	1	2203	tags=30%, list=14%, signal=35%
GOBP_VASCULAR_PROCESS_IN_CIRCULATORY_SYSTEM	GOBP_VASCULAR_PROCESS_IN_CIRCULATORY_SYSTEM	233	0.436633	1.31047	0.0680529	0.33436	1	2029	tags=27%, list=13%, signal=30%
GOBP_POSITIVE_REGULATION_OF_AMYLOID_PRECURSOR_PROTEIN_CATABOLIC_PROCESS	GOBP_POSITIVE_REGULATION_OF_AMYLOID_PRECURSOR_PROTEIN_CATABOLIC_PROCESS	20	0.470334	1.30993	0.145038	0.335068	1	3567	tags=40%, list=23%, signal=52%
GOMF_PHOSPHOLIPASE_A2_ACTIVITY	GOMF_PHOSPHOLIPASE_A2_ACTIVITY	23	0.568743	1.30985	0.12549	0.334981	1	3179	tags=48%, list=21%, signal=60%
GOBP_POSITIVE_REGULATION_OF_CELLULAR_CARBOHYDRATE_METABOLIC_PROCESS	GOBP_POSITIVE_REGULATION_OF_CELLULAR_CARBOHYDRATE_METABOLIC_PROCESS	47	0.42162	1.30985	0.0996016	0.334744	1	2110	tags=23%, list=14%, signal=27%
GOBP_NEGATIVE_REGULATION_OF_POTASSIUM_ION_TRANSMEMBRANE_TRANSPORT	GOBP_NEGATIVE_REGULATION_OF_POTASSIUM_ION_TRANSMEMBRANE_TRANSPORT	21	0.583006	1.30982	0.113244	0.33454	1	1477	tags=33%, list=10%, signal=37%
GOBP_REGULATION_OF_PROTEIN_DEPOLYMERIZATION	GOBP_REGULATION_OF_PROTEIN_DEPOLYMERIZATION	74	0.405145	1.30978	0.139764	0.33436	1	3628	tags=38%, list=24%, signal=49%
GOBP_ESTABLISHMENT_OF_CELL_POLARITY	GOBP_ESTABLISHMENT_OF_CELL_POLARITY	127	0.331182	1.30968	0.101961	0.33427	1	3754	tags=27%, list=24%, signal=35%
GOBP_REGULATION_OF_CELL_SUBSTRATE_JUNCTION_ORGANIZATION	GOBP_REGULATION_OF_CELL_SUBSTRATE_JUNCTION_ORGANIZATION	68	0.394596	1.30941	0.157685	0.334479	1	4807	tags=44%, list=31%, signal=64%
GOBP_REGULATION_OF_MAP_KINASE_ACTIVITY	GOBP_REGULATION_OF_MAP_KINASE_ACTIVITY	286	0.358377	1.30916	0.0752475	0.334646	1	3403	tags=31%, list=22%, signal=39%
GOCC_CELL_CORTEX	GOCC_CELL_CORTEX	267	0.329674	1.30901	0.0673077	0.334658	1	3297	tags=25%, list=21%, signal=31%
GOMF_GLYCOSAMINOGLYCAN_BINDING	GOMF_GLYCOSAMINOGLYCAN_BINDING	200	0.472687	1.30898	0.0928433	0.334465	1	2773	tags=35%, list=18%, signal=42%
GOBP_AXONEME_ASSEMBLY	GOBP_AXONEME_ASSEMBLY	43	0.682426	1.30846	0.20198	0.335104	1	3000	tags=65%, list=20%, signal=81%
GOBP_CELL_MATURATION	GOBP_CELL_MATURATION	147	0.394055	1.30832	0.0535714	0.335074	1	1697	tags=22%, list=11%, signal=24%
GOBP_REGULATION_OF_MUSCLE_ADAPTATION	GOBP_REGULATION_OF_MUSCLE_ADAPTATION	75	0.391576	1.30828	0.121457	0.334903	1	3174	tags=27%, list=21%, signal=33%
GOCC_SARCOPLASM	GOCC_SARCOPLASM	71	0.459832	1.308	0.112871	0.33509	1	2063	tags=28%, list=13%, signal=32%
GOBP_REGULATION_OF_RESPONSE_TO_REACTIVE_OXYGEN_SPECIES	GOBP_REGULATION_OF_RESPONSE_TO_REACTIVE_OXYGEN_SPECIES	26	0.493409	1.30786	0.118812	0.335072	1	2020	tags=35%, list=13%, signal=40%
GOCC_M_BAND	GOCC_M_BAND	23	0.531071	1.30785	0.17	0.334838	1	2982	tags=39%, list=19%, signal=48%
GOBP_POSITIVE_REGULATION_OF_T_HELPER_1_TYPE_IMMUNE_RESPONSE	GOBP_POSITIVE_REGULATION_OF_T_HELPER_1_TYPE_IMMUNE_RESPONSE	15	0.606618	1.30771	0.146199	0.334839	1	3152	tags=60%, list=21%, signal=75%
GOBP_REGULATION_OF_RECEPTOR_MEDIATED_ENDOCYTOSIS	GOBP_REGULATION_OF_RECEPTOR_MEDIATED_ENDOCYTOSIS	98	0.37362	1.3077	0.0992218	0.334621	1	4013	tags=36%, list=26%, signal=48%
GOBP_CELL_COMMUNICATION_BY_ELECTRICAL_COUPLING	GOBP_CELL_COMMUNICATION_BY_ELECTRICAL_COUPLING	30	0.545325	1.30761	0.118217	0.334518	1	3941	tags=57%, list=26%, signal=76%
GOBP_POSITIVE_REGULATION_OF_FATTY_ACID_BIOSYNTHETIC_PROCESS	GOBP_POSITIVE_REGULATION_OF_FATTY_ACID_BIOSYNTHETIC_PROCESS	21	0.508828	1.3074	0.143137	0.334644	1	2609	tags=33%, list=17%, signal=40%
GOBP_REGULATION_OF_MEMBRANE_PROTEIN_ECTODOMAIN_PROTEOLYSIS	GOBP_REGULATION_OF_MEMBRANE_PROTEIN_ECTODOMAIN_PROTEOLYSIS	22	0.524287	1.30736	0.161616	0.334477	1	3961	tags=50%, list=26%, signal=67%
GOBP_NEGATIVE_REGULATION_OF_ANOIKIS	GOBP_NEGATIVE_REGULATION_OF_ANOIKIS	17	0.522173	1.30703	0.159223	0.334822	1	1675	tags=24%, list=11%, signal=26%
GOBP_PHASIC_SMOOTH_MUSCLE_CONTRACTION	GOBP_PHASIC_SMOOTH_MUSCLE_CONTRACTION	21	0.537795	1.30674	0.111538	0.335109	1	2029	tags=33%, list=13%, signal=38%
GOBP_NEGATIVE_REGULATION_OF_TRANSPORT	GOBP_NEGATIVE_REGULATION_OF_TRANSPORT	373	0.371733	1.30641	0.0643939	0.335402	1	3378	tags=28%, list=22%, signal=35%
GOBP_HEART_MORPHOGENESIS	GOBP_HEART_MORPHOGENESIS	224	0.40553	1.30632	0.100193	0.335297	1	3546	tags=33%, list=23%, signal=42%
GOBP_GLIAL_CELL_DEVELOPMENT	GOBP_GLIAL_CELL_DEVELOPMENT	99	0.439109	1.30617	0.0953347	0.335323	1	1958	tags=23%, list=13%, signal=26%
GOBP_TRANSEPITHELIAL_TRANSPORT	GOBP_TRANSEPITHELIAL_TRANSPORT	29	0.53556	1.30592	0.109344	0.335478	1	2120	tags=38%, list=14%, signal=44%
GOBP_SIGNAL_TRANSDUCTION_IN_ABSENCE_OF_LIGAND	GOBP_SIGNAL_TRANSDUCTION_IN_ABSENCE_OF_LIGAND	64	0.421575	1.30591	0.088	0.335257	1	2609	tags=23%, list=17%, signal=28%
GOBP_VASCULAR_ASSOCIATED_SMOOTH_MUSCLE_CONTRACTION	GOBP_VASCULAR_ASSOCIATED_SMOOTH_MUSCLE_CONTRACTION	22	0.562216	1.30587	0.132554	0.335076	1	1799	tags=32%, list=12%, signal=36%
GOCC_COPII_COATED_ER_TO_GOLGI_TRANSPORT_VESICLE	GOCC_COPII_COATED_ER_TO_GOLGI_TRANSPORT_VESICLE	82	0.336636	1.30571	0.126953	0.335075	1	3345	tags=20%, list=22%, signal=25%
GOBP_ANATOMICAL_STRUCTURE_MATURATION	GOBP_ANATOMICAL_STRUCTURE_MATURATION	196	0.387986	1.30529	0.0674603	0.335534	1	1863	tags=22%, list=12%, signal=25%
GOBP_RESPONSE_TO_PURINE_CONTAINING_COMPOUND	GOBP_RESPONSE_TO_PURINE_CONTAINING_COMPOUND	137	0.409584	1.3052	0.07	0.335439	1	2140	tags=26%, list=14%, signal=30%
GOMF_TRANSFORMING_GROWTH_FACTOR_BETA_BINDING	GOMF_TRANSFORMING_GROWTH_FACTOR_BETA_BINDING	22	0.531325	1.30516	0.218147	0.335275	1	2254	tags=32%, list=15%, signal=37%
GOBP_NEGATIVE_REGULATION_OF_LIPID_METABOLIC_PROCESS	GOBP_NEGATIVE_REGULATION_OF_LIPID_METABOLIC_PROCESS	79	0.41599	1.305	0.0887097	0.335265	1	3785	tags=43%, list=25%, signal=57%
GOBP_HEMATOPOIETIC_PROGENITOR_CELL_DIFFERENTIATION	GOBP_HEMATOPOIETIC_PROGENITOR_CELL_DIFFERENTIATION	151	0.315663	1.30499	0.148148	0.335033	1	2031	tags=13%, list=13%, signal=15%
GOBP_REGULATION_OF_RECEPTOR_SIGNALING_PATHWAY_VIA_STAT	GOBP_REGULATION_OF_RECEPTOR_SIGNALING_PATHWAY_VIA_STAT	91	0.419373	1.30438	0.084453	0.335832	1	2401	tags=24%, list=16%, signal=28%
GOBP_REGULATION_OF_CELLULAR_COMPONENT_SIZE	GOBP_REGULATION_OF_CELLULAR_COMPONENT_SIZE	334	0.339361	1.30433	0.0872865	0.33568	1	3377	tags=28%, list=22%, signal=35%
GOBP_MULTICELLULAR_ORGANISMAL_HOMEOSTASIS	GOBP_MULTICELLULAR_ORGANISMAL_HOMEOSTASIS	483	0.373338	1.30422	0.0588235	0.33565	1	3368	tags=32%, list=22%, signal=40%
GOBP_SYNAPTIC_MEMBRANE_ADHESION	GOBP_SYNAPTIC_MEMBRANE_ADHESION	25	0.592874	1.30415	0.131474	0.335513	1	2306	tags=44%, list=15%, signal=52%
GOBP_POSITIVE_REGULATION_OF_CELLULAR_RESPONSE_TO_TRANSFORMING_GROWTH_FACTOR_BETA_STIMULUS	GOBP_POSITIVE_REGULATION_OF_CELLULAR_RESPONSE_TO_TRANSFORMING_GROWTH_FACTOR_BETA_STIMULUS	27	0.437053	1.30351	0.19	0.336354	1	3060	tags=26%, list=20%, signal=32%
GOBP_CYTOPLASMIC_PATTERN_RECOGNITION_RECEPTOR_SIGNALING_PATHWAY_IN_RESPONSE_TO_VIRUS	GOBP_CYTOPLASMIC_PATTERN_RECOGNITION_RECEPTOR_SIGNALING_PATHWAY_IN_RESPONSE_TO_VIRUS	26	0.382176	1.30328	0.223684	0.336513	1	4729	tags=35%, list=31%, signal=50%
GOCC_VOLTAGE_GATED_CALCIUM_CHANNEL_COMPLEX	GOCC_VOLTAGE_GATED_CALCIUM_CHANNEL_COMPLEX	39	0.487769	1.30327	0.0769231	0.336289	1	2838	tags=36%, list=18%, signal=44%
GOCC_EXOCYST	GOCC_EXOCYST	16	0.465939	1.30311	0.165657	0.336303	1	1933	tags=13%, list=13%, signal=14%
GOBP_CELL_DIFFERENTIATION_INVOLVED_IN_KIDNEY_DEVELOPMENT	GOBP_CELL_DIFFERENTIATION_INVOLVED_IN_KIDNEY_DEVELOPMENT	55	0.451005	1.30251	0.110476	0.337104	1	2011	tags=25%, list=13%, signal=29%
GOBP_IMMUNE_RESPONSE_TO_TUMOR_CELL	GOBP_IMMUNE_RESPONSE_TO_TUMOR_CELL	18	0.593183	1.30182	0.191147	0.338061	1	1638	tags=44%, list=11%, signal=50%
GOBP_NEGATIVE_REGULATION_OF_SMOOTH_MUSCLE_CELL_DIFFERENTIATION	GOBP_NEGATIVE_REGULATION_OF_SMOOTH_MUSCLE_CELL_DIFFERENTIATION	16	0.533157	1.30176	0.119522	0.337914	1	4256	tags=56%, list=28%, signal=78%
GOBP_CELLULAR_RESPONSE_TO_FLUID_SHEAR_STRESS	GOBP_CELLULAR_RESPONSE_TO_FLUID_SHEAR_STRESS	16	0.531801	1.30176	0.16185	0.337681	1	4754	tags=63%, list=31%, signal=90%
GOBP_RESPONSE_TO_ALKALOID	GOBP_RESPONSE_TO_ALKALOID	95	0.395814	1.30135	0.0889328	0.33815	1	1253	tags=18%, list=8%, signal=19%
GOCC_COLLAGEN_TRIMER	GOCC_COLLAGEN_TRIMER	78	0.526529	1.30127	0.12749	0.338049	1	1669	tags=29%, list=11%, signal=33%
GOBP_DEVELOPMENTAL_PIGMENTATION	GOBP_DEVELOPMENTAL_PIGMENTATION	40	0.454592	1.30094	0.0991903	0.338382	1	2239	tags=28%, list=15%, signal=32%
GOBP_VESICLE_MEDIATED_TRANSPORT_BETWEEN_ENDOSOMAL_COMPARTMENTS	GOBP_VESICLE_MEDIATED_TRANSPORT_BETWEEN_ENDOSOMAL_COMPARTMENTS	39	0.321525	1.30093	0.193939	0.338172	1	2882	tags=18%, list=19%, signal=22%
GOCC_CELL_SUBSTRATE_JUNCTION	GOCC_CELL_SUBSTRATE_JUNCTION	398	0.328795	1.30017	0.1881	0.339164	1	3747	tags=26%, list=24%, signal=33%
GOBP_REGULATION_OF_GLYCOPROTEIN_METABOLIC_PROCESS	GOBP_REGULATION_OF_GLYCOPROTEIN_METABOLIC_PROCESS	40	0.460881	1.2999	0.161228	0.339405	1	2862	tags=33%, list=19%, signal=40%
GOBP_NEGATIVE_REGULATION_OF_VIRAL_GENOME_REPLICATION	GOBP_NEGATIVE_REGULATION_OF_VIRAL_GENOME_REPLICATION	46	0.467426	1.29982	0.184211	0.339294	1	3580	tags=41%, list=23%, signal=54%
GOMF_ACTIN_FILAMENT_BINDING	GOMF_ACTIN_FILAMENT_BINDING	189	0.362362	1.29973	0.0935673	0.339222	1	3740	tags=32%, list=24%, signal=42%
GOBP_POSITIVE_REGULATION_OF_CATION_CHANNEL_ACTIVITY	GOBP_POSITIVE_REGULATION_OF_CATION_CHANNEL_ACTIVITY	61	0.466754	1.29932	0.0731225	0.339704	1	3215	tags=39%, list=21%, signal=50%
GOBP_REGULATION_OF_NON_CANONICAL_WNT_SIGNALING_PATHWAY	GOBP_REGULATION_OF_NON_CANONICAL_WNT_SIGNALING_PATHWAY	23	0.549658	1.29918	0.166333	0.339705	1	3329	tags=39%, list=22%, signal=50%
GOBP_BLOOD_COAGULATION_INTRINSIC_PATHWAY	GOBP_BLOOD_COAGULATION_INTRINSIC_PATHWAY	17	0.585137	1.29912	0.135294	0.339563	1	1407	tags=35%, list=9%, signal=39%
GOMF_SOLUTE_CATION_ANTIPORTER_ACTIVITY	GOMF_SOLUTE_CATION_ANTIPORTER_ACTIVITY	26	0.486397	1.29873	0.160079	0.339949	1	3643	tags=46%, list=24%, signal=60%
GOBP_NEUROTROPHIN_SIGNALING_PATHWAY	GOBP_NEUROTROPHIN_SIGNALING_PATHWAY	37	0.487789	1.29866	0.144841	0.339854	1	4123	tags=49%, list=27%, signal=66%
GOBP_POSITIVE_REGULATION_OF_CALCIUM_ION_TRANSMEMBRANE_TRANSPORTER_ACTIVITY	GOBP_POSITIVE_REGULATION_OF_CALCIUM_ION_TRANSMEMBRANE_TRANSPORTER_ACTIVITY	33	0.495566	1.29829	0.122371	0.340215	1	2007	tags=27%, list=13%, signal=31%
GOBP_RESPIRATORY_SYSTEM_DEVELOPMENT	GOBP_RESPIRATORY_SYSTEM_DEVELOPMENT	179	0.411369	1.29792	0.0982659	0.340606	1	2352	tags=25%, list=15%, signal=29%
GOCC_PLATELET_DENSE_GRANULE	GOCC_PLATELET_DENSE_GRANULE	19	0.542146	1.29765	0.133205	0.34083	1	2027	tags=32%, list=13%, signal=36%
GOBP_REGULATION_OF_CATION_CHANNEL_ACTIVITY	GOBP_REGULATION_OF_CATION_CHANNEL_ACTIVITY	151	0.430495	1.29753	0.0753968	0.340786	1	2063	tags=24%, list=13%, signal=27%
GOBP_GLOMERULAR_EPITHELIUM_DEVELOPMENT	GOBP_GLOMERULAR_EPITHELIUM_DEVELOPMENT	23	0.516111	1.29733	0.132812	0.340875	1	2268	tags=35%, list=15%, signal=41%
GOBP_TRABECULA_MORPHOGENESIS	GOBP_TRABECULA_MORPHOGENESIS	42	0.465661	1.2972	0.140655	0.340878	1	2163	tags=26%, list=14%, signal=30%
GOBP_REGULATION_OF_GLUCOSE_IMPORT	GOBP_REGULATION_OF_GLUCOSE_IMPORT	51	0.41269	1.29711	0.116635	0.340775	1	2862	tags=27%, list=19%, signal=34%
GOBP_ORGAN_GROWTH	GOBP_ORGAN_GROWTH	139	0.412389	1.29705	0.132554	0.340625	1	2352	tags=23%, list=15%, signal=27%
GOBP_COGNITION	GOBP_COGNITION	256	0.396683	1.29701	0.0675944	0.340457	1	3036	tags=28%, list=20%, signal=34%
GOBP_PRODUCTION_OF_MOLECULAR_MEDIATOR_INVOLVED_IN_INFLAMMATORY_RESPONSE	GOBP_PRODUCTION_OF_MOLECULAR_MEDIATOR_INVOLVED_IN_INFLAMMATORY_RESPONSE	66	0.461935	1.2966	0.159176	0.340907	1	4651	tags=55%, list=30%, signal=78%
GOBP_ANIMAL_ORGAN_REGENERATION	GOBP_ANIMAL_ORGAN_REGENERATION	70	0.411615	1.29657	0.124764	0.340724	1	2895	tags=31%, list=19%, signal=39%
GOBP_GLIOGENESIS	GOBP_GLIOGENESIS	261	0.393661	1.29582	0.0865191	0.341727	1	2827	tags=28%, list=18%, signal=33%
GOBP_POSITIVE_REGULATION_OF_VASCULAR_ENDOTHELIAL_GROWTH_FACTOR_PRODUCTION	GOBP_POSITIVE_REGULATION_OF_VASCULAR_ENDOTHELIAL_GROWTH_FACTOR_PRODUCTION	27	0.560992	1.29555	0.153846	0.341939	1	3497	tags=52%, list=23%, signal=67%
GOBP_NEGATIVE_REGULATION_OF_HEMOPOIESIS	GOBP_NEGATIVE_REGULATION_OF_HEMOPOIESIS	93	0.430243	1.29523	0.150301	0.342233	1	3785	tags=39%, list=25%, signal=51%
GOBP_POSITIVE_REGULATION_OF_GLYCOPROTEIN_METABOLIC_PROCESS	GOBP_POSITIVE_REGULATION_OF_GLYCOPROTEIN_METABOLIC_PROCESS	20	0.526722	1.29506	0.2	0.342276	1	1427	tags=20%, list=9%, signal=22%
GOBP_REGULATION_OF_PROTEIN_TARGETING_TO_MITOCHONDRION	GOBP_REGULATION_OF_PROTEIN_TARGETING_TO_MITOCHONDRION	41	0.307479	1.29503	0.170412	0.342083	1	2583	tags=12%, list=17%, signal=15%
GOBP_PHOSPHATE_ION_TRANSMEMBRANE_TRANSPORT	GOBP_PHOSPHATE_ION_TRANSMEMBRANE_TRANSPORT	15	0.490858	1.29479	0.138144	0.342239	1	3392	tags=33%, list=22%, signal=43%
GOMF_KINASE_INHIBITOR_ACTIVITY	GOMF_KINASE_INHIBITOR_ACTIVITY	61	0.357518	1.29465	0.106178	0.342236	1	4679	tags=38%, list=30%, signal=54%
GOBP_GRANULOCYTE_MIGRATION	GOBP_GRANULOCYTE_MIGRATION	127	0.47085	1.29427	0.143969	0.342634	1	3234	tags=40%, list=21%, signal=50%
GOBP_RESPONSE_TO_CHEMOKINE	GOBP_RESPONSE_TO_CHEMOKINE	78	0.556016	1.29407	0.130604	0.342725	1	2964	tags=46%, list=19%, signal=57%
GOBP_REGULATION_OF_POTASSIUM_ION_TRANSMEMBRANE_TRANSPORTER_ACTIVITY	GOBP_REGULATION_OF_POTASSIUM_ION_TRANSMEMBRANE_TRANSPORTER_ACTIVITY	51	0.465269	1.29378	0.0986193	0.342937	1	1477	tags=27%, list=10%, signal=30%
GOBP_REGULATION_OF_HEART_GROWTH	GOBP_REGULATION_OF_HEART_GROWTH	60	0.444998	1.29374	0.153101	0.342766	1	3057	tags=33%, list=20%, signal=41%
GOBP_REGULATION_OF_FATTY_ACID_BETA_OXIDATION	GOBP_REGULATION_OF_FATTY_ACID_BETA_OXIDATION	19	0.472664	1.29367	0.117308	0.342629	1	1853	tags=26%, list=12%, signal=30%
GOBP_GAS_TRANSPORT	GOBP_GAS_TRANSPORT	16	0.593983	1.29346	0.107807	0.342742	1	1690	tags=31%, list=11%, signal=35%
GOBP_ADENYLATE_CYCLASE_MODULATING_G_PROTEIN_COUPLED_RECEPTOR_SIGNALING_PATHWAY	GOBP_ADENYLATE_CYCLASE_MODULATING_G_PROTEIN_COUPLED_RECEPTOR_SIGNALING_PATHWAY	197	0.422602	1.2934	0.0603113	0.342597	1	3660	tags=37%, list=24%, signal=47%
GOBP_RNA_DESTABILIZATION	GOBP_RNA_DESTABILIZATION	34	0.361539	1.29327	0.190291	0.342575	1	4765	tags=35%, list=31%, signal=51%
GOBP_REGULATION_OF_ALTERNATIVE_MRNA_SPLICING_VIA_SPLICEOSOME	GOBP_REGULATION_OF_ALTERNATIVE_MRNA_SPLICING_VIA_SPLICEOSOME	56	0.377402	1.29244	0.166316	0.343683	1	2223	tags=14%, list=14%, signal=17%
GOMF_CALCIUM_RELEASE_CHANNEL_ACTIVITY	GOMF_CALCIUM_RELEASE_CHANNEL_ACTIVITY	17	0.537172	1.29225	0.151093	0.343756	1	2433	tags=41%, list=16%, signal=49%
GOMF_VOLTAGE_GATED_SODIUM_CHANNEL_ACTIVITY	GOMF_VOLTAGE_GATED_SODIUM_CHANNEL_ACTIVITY	23	0.582945	1.29223	0.134503	0.343551	1	1647	tags=26%, list=11%, signal=29%
GOBP_RESPONSE_TO_STEROID_HORMONE	GOBP_RESPONSE_TO_STEROID_HORMONE	302	0.356378	1.2921	0.0613861	0.343544	1	2254	tags=20%, list=15%, signal=23%
GOMF_G_PROTEIN_BETA_GAMMA_SUBUNIT_COMPLEX_BINDING	GOMF_G_PROTEIN_BETA_GAMMA_SUBUNIT_COMPLEX_BINDING	19	0.494946	1.29156	0.175439	0.34421	1	5625	tags=58%, list=37%, signal=91%
GOMF_HEPARAN_SULFATE_PROTEOGLYCAN_BINDING	GOMF_HEPARAN_SULFATE_PROTEOGLYCAN_BINDING	17	0.58458	1.29112	0.122736	0.344698	1	3359	tags=71%, list=22%, signal=90%
GOBP_TISSUE_MIGRATION	GOBP_TISSUE_MIGRATION	282	0.379729	1.2911	0.129845	0.3445	1	3401	tags=33%, list=22%, signal=42%
GOBP_NEGATIVE_REGULATION_OF_INTRACELLULAR_STEROID_HORMONE_RECEPTOR_SIGNALING_PATHWAY	GOBP_NEGATIVE_REGULATION_OF_INTRACELLULAR_STEROID_HORMONE_RECEPTOR_SIGNALING_PATHWAY	34	0.425534	1.29071	0.133466	0.344911	1	2171	tags=21%, list=14%, signal=24%
GOBP_CELL_MATRIX_ADHESION	GOBP_CELL_MATRIX_ADHESION	213	0.391411	1.29067	0.154426	0.344743	1	3213	tags=32%, list=21%, signal=40%
GOBP_ACTIVATION_OF_PROTEIN_KINASE_ACTIVITY	GOBP_ACTIVATION_OF_PROTEIN_KINASE_ACTIVITY	307	0.320348	1.29065	0.0644531	0.344534	1	3358	tags=27%, list=22%, signal=34%
GOMF_PROTEOGLYCAN_BINDING	GOMF_PROTEOGLYCAN_BINDING	34	0.525023	1.29065	0.134538	0.344302	1	3359	tags=47%, list=22%, signal=60%
GOBP_MAINTENANCE_OF_LOCATION	GOBP_MAINTENANCE_OF_LOCATION	287	0.35873	1.29046	0.0814394	0.344402	1	3623	tags=29%, list=24%, signal=38%
GOBP_REGULATION_OF_EPITHELIAL_CELL_APOPTOTIC_PROCESS	GOBP_REGULATION_OF_EPITHELIAL_CELL_APOPTOTIC_PROCESS	77	0.442831	1.2902	0.128846	0.344601	1	2964	tags=35%, list=19%, signal=43%
GOBP_SNARE_COMPLEX_ASSEMBLY	GOBP_SNARE_COMPLEX_ASSEMBLY	16	0.498533	1.29019	0.166341	0.34438	1	2878	tags=38%, list=19%, signal=46%
GOBP_NEGATIVE_REGULATION_OF_ION_TRANSPORT	GOBP_NEGATIVE_REGULATION_OF_ION_TRANSPORT	267	0.378132	1.29013	0.0890538	0.344261	1	1750	tags=17%, list=11%, signal=19%
GOBP_OVULATION_CYCLE	GOBP_OVULATION_CYCLE	61	0.465452	1.29008	0.122605	0.344121	1	3308	tags=36%, list=22%, signal=46%
GOBP_POSTSYNAPTIC_NEUROTRANSMITTER_RECEPTOR_INTERNALIZATION	GOBP_POSTSYNAPTIC_NEUROTRANSMITTER_RECEPTOR_INTERNALIZATION	18	0.461742	1.2899	0.173152	0.344175	1	3586	tags=39%, list=23%, signal=51%
GOMF_LOW_DENSITY_LIPOPROTEIN_PARTICLE_BINDING	GOMF_LOW_DENSITY_LIPOPROTEIN_PARTICLE_BINDING	17	0.609032	1.28964	0.16763	0.344354	1	1779	tags=35%, list=12%, signal=40%
GOBP_REGULATION_OF_NEURON_PROJECTION_ARBORIZATION	GOBP_REGULATION_OF_NEURON_PROJECTION_ARBORIZATION	15	0.509819	1.28933	0.151261	0.344631	1	3396	tags=40%, list=22%, signal=51%
GOBP_POSITIVE_REGULATION_OF_CALCIUM_ION_TRANSMEMBRANE_TRANSPORT	GOBP_POSITIVE_REGULATION_OF_CALCIUM_ION_TRANSMEMBRANE_TRANSPORT	62	0.46359	1.289	0.0912548	0.344958	1	3353	tags=42%, list=22%, signal=53%
GOMF_GTPASE_BINDING	GOMF_GTPASE_BINDING	203	0.249825	1.28899	0.111753	0.344743	1	3879	tags=27%, list=25%, signal=35%
GOBP_AMINOGLYCAN_METABOLIC_PROCESS	GOBP_AMINOGLYCAN_METABOLIC_PROCESS	165	0.400971	1.28886	0.0975143	0.344703	1	3453	tags=32%, list=22%, signal=41%
GOBP_AMINOGLYCAN_CATABOLIC_PROCESS	GOBP_AMINOGLYCAN_CATABOLIC_PROCESS	64	0.448008	1.28884	0.120388	0.344511	1	3415	tags=38%, list=22%, signal=48%
GOBP_POSITIVE_REGULATION_OF_BINDING	GOBP_POSITIVE_REGULATION_OF_BINDING	159	0.343731	1.2886	0.112621	0.344693	1	3638	tags=25%, list=24%, signal=33%
GOBP_DNA_DEMETHYLATION	GOBP_DNA_DEMETHYLATION	25	0.469341	1.28836	0.158915	0.344873	1	2410	tags=28%, list=16%, signal=33%
GOBP_STRIATED_MUSCLE_CELL_DEVELOPMENT	GOBP_STRIATED_MUSCLE_CELL_DEVELOPMENT	93	0.443605	1.28827	0.134269	0.344801	1	2818	tags=31%, list=18%, signal=38%
GOBP_POSITIVE_REGULATION_OF_LYMPHOCYTE_MIGRATION	GOBP_POSITIVE_REGULATION_OF_LYMPHOCYTE_MIGRATION	32	0.522797	1.28792	0.17284	0.345126	1	2314	tags=41%, list=15%, signal=48%
GOBP_FIBROBLAST_APOPTOTIC_PROCESS	GOBP_FIBROBLAST_APOPTOTIC_PROCESS	20	0.471609	1.28786	0.166341	0.344983	1	3296	tags=30%, list=21%, signal=38%
GOBP_RESPONSE_TO_CAFFEINE	GOBP_RESPONSE_TO_CAFFEINE	16	0.575988	1.28674	0.147541	0.346687	1	1139	tags=31%, list=7%, signal=34%
GOBP_LAMELLIPODIUM_ORGANIZATION	GOBP_LAMELLIPODIUM_ORGANIZATION	81	0.351965	1.2867	0.128514	0.346506	1	3472	tags=31%, list=23%, signal=40%
GOBP_REGULATION_OF_CELLULAR_RESPONSE_TO_VASCULAR_ENDOTHELIAL_GROWTH_FACTOR_STIMULUS	GOBP_REGULATION_OF_CELLULAR_RESPONSE_TO_VASCULAR_ENDOTHELIAL_GROWTH_FACTOR_STIMULUS	20	0.536157	1.28638	0.15121	0.346799	1	3112	tags=45%, list=20%, signal=56%
GOMF_MHC_CLASS_I_PROTEIN_BINDING	GOMF_MHC_CLASS_I_PROTEIN_BINDING	16	0.604538	1.28625	0.23062	0.346769	1	5314	tags=75%, list=35%, signal=115%
GOBP_CELL_CELL_SIGNALING_INVOLVED_IN_CARDIAC_CONDUCTION	GOBP_CELL_CELL_SIGNALING_INVOLVED_IN_CARDIAC_CONDUCTION	29	0.559731	1.28623	0.14902	0.346571	1	2601	tags=38%, list=17%, signal=46%
GOMF_IMMUNOGLOBULIN_BINDING	GOMF_IMMUNOGLOBULIN_BINDING	20	0.603746	1.28542	0.154902	0.347664	1	1407	tags=40%, list=9%, signal=44%
GOBP_FATTY_ACID_DERIVATIVE_BIOSYNTHETIC_PROCESS	GOBP_FATTY_ACID_DERIVATIVE_BIOSYNTHETIC_PROCESS	50	0.438286	1.28527	0.11976	0.347642	1	2096	tags=26%, list=14%, signal=30%
GOCC_ACTIN_FILAMENT_BUNDLE	GOCC_ACTIN_FILAMENT_BUNDLE	63	0.434238	1.28509	0.20904	0.347711	1	3569	tags=35%, list=23%, signal=45%
GOBP_NEGATIVE_REGULATION_OF_T_CELL_MEDIATED_IMMUNITY	GOBP_NEGATIVE_REGULATION_OF_T_CELL_MEDIATED_IMMUNITY	21	0.595092	1.28506	0.18677	0.347514	1	3785	tags=62%, list=25%, signal=82%
GOBP_STEROL_HOMEOSTASIS	GOBP_STEROL_HOMEOSTASIS	72	0.457778	1.28481	0.149901	0.347656	1	2788	tags=38%, list=18%, signal=46%
GOBP_FIBROBLAST_GROWTH_FACTOR_RECEPTOR_SIGNALING_PATHWAY	GOBP_FIBROBLAST_GROWTH_FACTOR_RECEPTOR_SIGNALING_PATHWAY	101	0.373299	1.28461	0.110266	0.347758	1	1741	tags=16%, list=11%, signal=18%
GOBP_POSITIVE_REGULATION_OF_SIGNALING_RECEPTOR_ACTIVITY	GOBP_POSITIVE_REGULATION_OF_SIGNALING_RECEPTOR_ACTIVITY	39	0.501891	1.28459	0.146	0.347565	1	3338	tags=46%, list=22%, signal=59%
GOCC_ACROSOMAL_MEMBRANE	GOCC_ACROSOMAL_MEMBRANE	22	0.484362	1.28428	0.12476	0.347821	1	3326	tags=32%, list=22%, signal=41%
GOBP_RESPONSE_TO_MITOCHONDRIAL_DEPOLARISATION	GOBP_RESPONSE_TO_MITOCHONDRIAL_DEPOLARISATION	16	0.37369	1.284	0.194831	0.348046	1	5278	tags=50%, list=34%, signal=76%
GOBP_REGULATION_OF_CILIUM_MOVEMENT	GOBP_REGULATION_OF_CILIUM_MOVEMENT	22	0.543902	1.28317	0.163776	0.349171	1	2141	tags=32%, list=14%, signal=37%
GOBP_NEGATIVE_REGULATION_OF_REACTIVE_OXYGEN_SPECIES_METABOLIC_PROCESS	GOBP_NEGATIVE_REGULATION_OF_REACTIVE_OXYGEN_SPECIES_METABOLIC_PROCESS	49	0.372653	1.28298	0.112595	0.349231	1	2962	tags=27%, list=19%, signal=33%
GOBP_POSITIVE_REGULATION_OF_NEURON_DEATH	GOBP_POSITIVE_REGULATION_OF_NEURON_DEATH	85	0.359868	1.28285	0.118908	0.349208	1	3211	tags=32%, list=21%, signal=40%
GOBP_VENTRICULAR_SEPTUM_DEVELOPMENT	GOBP_VENTRICULAR_SEPTUM_DEVELOPMENT	60	0.452252	1.28265	0.169591	0.349319	1	2544	tags=30%, list=17%, signal=36%
GOBP_REGULATION_OF_MUSCLE_SYSTEM_PROCESS	GOBP_REGULATION_OF_MUSCLE_SYSTEM_PROCESS	206	0.392039	1.28264	0.094162	0.349093	1	3215	tags=30%, list=21%, signal=37%
GOBP_GTP_METABOLIC_PROCESS	GOBP_GTP_METABOLIC_PROCESS	21	0.404811	1.28264	0.194499	0.348865	1	870	tags=14%, list=6%, signal=15%
GOBP_POSITIVE_REGULATION_OF_MUSCLE_CELL_APOPTOTIC_PROCESS	GOBP_POSITIVE_REGULATION_OF_MUSCLE_CELL_APOPTOTIC_PROCESS	23	0.489247	1.28246	0.172619	0.348901	1	4636	tags=52%, list=30%, signal=75%
GOBP_POSITIVE_REGULATION_OF_GLYCOLYTIC_PROCESS	GOBP_POSITIVE_REGULATION_OF_GLYCOLYTIC_PROCESS	23	0.490144	1.28232	0.148362	0.348914	1	3211	tags=30%, list=21%, signal=38%
GOBP_REGULATION_OF_CELL_MATRIX_ADHESION	GOBP_REGULATION_OF_CELL_MATRIX_ADHESION	117	0.378614	1.28199	0.1409	0.349237	1	3765	tags=32%, list=25%, signal=42%
GOBP_ANTIGEN_PROCESSING_AND_PRESENTATION_OF_EXOGENOUS_PEPTIDE_ANTIGEN_VIA_MHC_CLASS_I	GOBP_ANTIGEN_PROCESSING_AND_PRESENTATION_OF_EXOGENOUS_PEPTIDE_ANTIGEN_VIA_MHC_CLASS_I	73	0.336654	1.28196	0.269903	0.349044	1	4583	tags=29%, list=30%, signal=41%
GOBP_BENZENE_CONTAINING_COMPOUND_METABOLIC_PROCESS	GOBP_BENZENE_CONTAINING_COMPOUND_METABOLIC_PROCESS	21	0.556222	1.28186	0.159836	0.348983	1	4284	tags=67%, list=28%, signal=92%
GOBP_HEART_DEVELOPMENT	GOBP_HEART_DEVELOPMENT	493	0.374574	1.28179	0.14751	0.348874	1	3612	tags=31%, list=24%, signal=39%
GOBP_POSITIVE_REGULATION_OF_MACROPHAGE_ACTIVATION	GOBP_POSITIVE_REGULATION_OF_MACROPHAGE_ACTIVATION	23	0.550308	1.28171	0.156436	0.348799	1	2261	tags=43%, list=15%, signal=51%
GOBP_POSITIVE_REGULATION_OF_INSULIN_SECRETION	GOBP_POSITIVE_REGULATION_OF_INSULIN_SECRETION	65	0.395981	1.28123	0.100196	0.349345	1	2513	tags=20%, list=16%, signal=24%
GOBP_NEGATIVE_REGULATION_OF_NEURON_DEATH	GOBP_NEGATIVE_REGULATION_OF_NEURON_DEATH	175	0.353265	1.28103	0.0644531	0.349457	1	3011	tags=26%, list=20%, signal=32%
GOBP_HEART_VALVE_DEVELOPMENT	GOBP_HEART_VALVE_DEVELOPMENT	58	0.471908	1.28088	0.192381	0.349491	1	3546	tags=40%, list=23%, signal=51%
GOBP_TEMPERATURE_HOMEOSTASIS	GOBP_TEMPERATURE_HOMEOSTASIS	166	0.379938	1.28064	0.0838095	0.349678	1	3241	tags=31%, list=21%, signal=39%
GOCC_ENDOLYSOSOME	GOCC_ENDOLYSOSOME	22	0.485462	1.28058	0.193117	0.349562	1	2051	tags=23%, list=13%, signal=26%
GOCC_PHOSPHATASE_COMPLEX	GOCC_PHOSPHATASE_COMPLEX	46	0.312656	1.27982	0.161034	0.350596	1	2541	tags=15%, list=17%, signal=18%
GOBP_CARDIAC_SEPTUM_DEVELOPMENT	GOBP_CARDIAC_SEPTUM_DEVELOPMENT	91	0.427846	1.27962	0.171937	0.350718	1	3546	tags=35%, list=23%, signal=45%
GOMF_PHOSPHATIDYLINOSITOL_3_KINASE_BINDING	GOMF_PHOSPHATIDYLINOSITOL_3_KINASE_BINDING	31	0.452771	1.27909	0.184261	0.351347	1	1722	tags=32%, list=11%, signal=36%
GOBP_REGULATION_OF_MACROPHAGE_ACTIVATION	GOBP_REGULATION_OF_MACROPHAGE_ACTIVATION	49	0.501023	1.27854	0.162835	0.352015	1	2496	tags=37%, list=16%, signal=44%
GOBP_PROTEIN_LOCALIZATION_TO_LYSOSOME	GOBP_PROTEIN_LOCALIZATION_TO_LYSOSOME	40	0.333907	1.27846	0.174853	0.351912	1	5710	tags=52%, list=37%, signal=83%
GOBP_POSITIVE_REGULATION_OF_NEUROTRANSMITTER_SECRETION	GOBP_POSITIVE_REGULATION_OF_NEUROTRANSMITTER_SECRETION	15	0.540949	1.27844	0.159236	0.351711	1	2029	tags=33%, list=13%, signal=38%
GOBP_SCHWANN_CELL_DEVELOPMENT	GOBP_SCHWANN_CELL_DEVELOPMENT	25	0.468166	1.27825	0.168651	0.3518	1	1246	tags=16%, list=8%, signal=17%
GOBP_GLYCOSYL_COMPOUND_CATABOLIC_PROCESS	GOBP_GLYCOSYL_COMPOUND_CATABOLIC_PROCESS	36	0.432789	1.278	0.158824	0.351963	1	3580	tags=39%, list=23%, signal=51%
GOBP_REGULATION_OF_INTRACELLULAR_TRANSPORT	GOBP_REGULATION_OF_INTRACELLULAR_TRANSPORT	309	0.254336	1.27784	0.109023	0.352005	1	3375	tags=19%, list=22%, signal=24%
GOBP_PEPTIDYL_L_CYSTEINE_S_PALMITOYLATION	GOBP_PEPTIDYL_L_CYSTEINE_S_PALMITOYLATION	23	0.436005	1.27752	0.154455	0.35233	1	4746	tags=43%, list=31%, signal=63%
GOBP_REGULATION_OF_WNT_SIGNALING_PATHWAY_PLANAR_CELL_POLARITY_PATHWAY	GOBP_REGULATION_OF_WNT_SIGNALING_PATHWAY_PLANAR_CELL_POLARITY_PATHWAY	15	0.603628	1.27734	0.17004	0.35238	1	3870	tags=53%, list=25%, signal=71%
GOBP_REGULATION_OF_CAMP_DEPENDENT_PROTEIN_KINASE_ACTIVITY	GOBP_REGULATION_OF_CAMP_DEPENDENT_PROTEIN_KINASE_ACTIVITY	19	0.491115	1.27716	0.153846	0.352461	1	3515	tags=32%, list=23%, signal=41%
GOMF_PHOSPHATIDYLCHOLINE_TRANSPORTER_ACTIVITY	GOMF_PHOSPHATIDYLCHOLINE_TRANSPORTER_ACTIVITY	17	0.518335	1.27712	0.164032	0.352301	1	2836	tags=41%, list=18%, signal=50%
GOBP_ENDOTHELIAL_CELL_APOPTOTIC_PROCESS	GOBP_ENDOTHELIAL_CELL_APOPTOTIC_PROCESS	51	0.49274	1.27702	0.146718	0.352218	1	2994	tags=43%, list=19%, signal=53%
GOCC_LYSOSOMAL_LUMEN	GOCC_LYSOSOMAL_LUMEN	89	0.387539	1.27673	0.174905	0.352477	1	4525	tags=43%, list=29%, signal=60%
GOBP_NEGATIVE_REGULATION_OF_I_KAPPAB_KINASE_NF_KAPPAB_SIGNALING	GOBP_NEGATIVE_REGULATION_OF_I_KAPPAB_KINASE_NF_KAPPAB_SIGNALING	40	0.405071	1.27632	0.190196	0.352987	1	4391	tags=38%, list=29%, signal=52%
GOCC_ACTOMYOSIN	GOCC_ACTOMYOSIN	65	0.425788	1.27624	0.210832	0.352871	1	2865	tags=26%, list=19%, signal=32%
GOBP_VESICLE_BUDDING_FROM_MEMBRANE	GOBP_VESICLE_BUDDING_FROM_MEMBRANE	102	0.254662	1.27613	0.149723	0.352846	1	2261	tags=11%, list=15%, signal=13%
GOMF_PHOSPHOLIPID_TRANSPORTER_ACTIVITY	GOMF_PHOSPHOLIPID_TRANSPORTER_ACTIVITY	46	0.411081	1.27594	0.132937	0.352943	1	2836	tags=33%, list=18%, signal=40%
GOBP_MULTICELLULAR_ORGANISM_GROWTH	GOBP_MULTICELLULAR_ORGANISM_GROWTH	122	0.331298	1.27565	0.11068	0.353174	1	3199	tags=24%, list=21%, signal=30%
GOBP_G_PROTEIN_COUPLED_RECEPTOR_SIGNALING_PATHWAY_COUPLED_TO_CYCLIC_NUCLEOTIDE_SECOND_MESSENGER	GOBP_G_PROTEIN_COUPLED_RECEPTOR_SIGNALING_PATHWAY_COUPLED_TO_CYCLIC_NUCLEOTIDE_SECOND_MESSENGER	56	0.444672	1.27517	0.0646465	0.353733	1	2964	tags=30%, list=19%, signal=37%
GOBP_NEGATIVE_REGULATION_OF_RECEPTOR_SIGNALING_PATHWAY_VIA_JAK_STAT	GOBP_NEGATIVE_REGULATION_OF_RECEPTOR_SIGNALING_PATHWAY_VIA_JAK_STAT	22	0.444662	1.27467	0.171875	0.354333	1	4085	tags=36%, list=27%, signal=49%
GOBP_RESPONSE_TO_AMINO_ACID_STARVATION	GOBP_RESPONSE_TO_AMINO_ACID_STARVATION	45	0.341522	1.27447	0.190763	0.354428	1	3467	tags=22%, list=23%, signal=29%
GOBP_RESPONSE_TO_INTERLEUKIN_12	GOBP_RESPONSE_TO_INTERLEUKIN_12	46	0.416379	1.27408	0.210421	0.354841	1	3513	tags=30%, list=23%, signal=39%
GOBP_OVULATION_CYCLE_PROCESS	GOBP_OVULATION_CYCLE_PROCESS	42	0.47414	1.27398	0.120858	0.354795	1	2550	tags=31%, list=17%, signal=37%
GOBP_POSITIVE_REGULATION_OF_GLUCOSE_IMPORT	GOBP_POSITIVE_REGULATION_OF_GLUCOSE_IMPORT	35	0.418337	1.27395	0.168605	0.354602	1	3144	tags=31%, list=20%, signal=39%
GOBP_REGULATION_OF_UBIQUITIN_DEPENDENT_PROTEIN_CATABOLIC_PROCESS	GOBP_REGULATION_OF_UBIQUITIN_DEPENDENT_PROTEIN_CATABOLIC_PROCESS	144	0.250657	1.27394	0.119192	0.35439	1	1985	tags=11%, list=13%, signal=13%
GOMF_HYDROLASE_ACTIVITY_ACTING_ON_CARBON_NITROGEN_BUT_NOT_PEPTIDE_BONDS_IN_LINEAR_AMIDES	GOMF_HYDROLASE_ACTIVITY_ACTING_ON_CARBON_NITROGEN_BUT_NOT_PEPTIDE_BONDS_IN_LINEAR_AMIDES	60	0.369416	1.27393	0.123984	0.35418	1	1936	tags=15%, list=13%, signal=17%
GOBP_HUMORAL_IMMUNE_RESPONSE	GOBP_HUMORAL_IMMUNE_RESPONSE	234	0.463049	1.27388	0.113131	0.354029	1	2630	tags=35%, list=17%, signal=41%
GOMF_STEROID_BINDING	GOMF_STEROID_BINDING	95	0.410262	1.2733	0.110664	0.354721	1	4237	tags=41%, list=28%, signal=56%
GOBP_ACTIN_FILAMENT_BASED_MOVEMENT	GOBP_ACTIN_FILAMENT_BASED_MOVEMENT	142	0.428784	1.27327	0.121272	0.354534	1	3752	tags=42%, list=24%, signal=54%
GOBP_SKELETAL_MUSCLE_CELL_DIFFERENTIATION	GOBP_SKELETAL_MUSCLE_CELL_DIFFERENTIATION	57	0.426126	1.27315	0.141988	0.35451	1	3020	tags=32%, list=20%, signal=39%
GOBP_REGULATION_OF_LAMELLIPODIUM_ASSEMBLY	GOBP_REGULATION_OF_LAMELLIPODIUM_ASSEMBLY	36	0.396023	1.27296	0.141732	0.354568	1	3472	tags=31%, list=23%, signal=39%
GOCC_CILIARY_MEMBRANE	GOCC_CILIARY_MEMBRANE	63	0.39708	1.27251	0.141732	0.355043	1	4212	tags=38%, list=27%, signal=52%
GOBP_RETROGRADE_TRANSPORT_ENDOSOME_TO_GOLGI	GOBP_RETROGRADE_TRANSPORT_ENDOSOME_TO_GOLGI	73	0.26098	1.27249	0.194393	0.354836	1	1073	tags=5%, list=7%, signal=6%
GOBP_RENAL_SODIUM_EXCRETION	GOBP_RENAL_SODIUM_EXCRETION	18	0.55208	1.27242	0.153543	0.354708	1	580	tags=22%, list=4%, signal=23%
GOBP_HEART_PROCESS	GOBP_HEART_PROCESS	266	0.408503	1.27217	0.0996094	0.354873	1	3546	tags=35%, list=23%, signal=45%
GOBP_NEGATIVE_REGULATION_OF_CELL_KILLING	GOBP_NEGATIVE_REGULATION_OF_CELL_KILLING	21	0.556296	1.27165	0.202729	0.355574	1	3962	tags=67%, list=26%, signal=90%
GOMF_GROWTH_FACTOR_BINDING	GOMF_GROWTH_FACTOR_BINDING	127	0.420753	1.27154	0.14902	0.355533	1	2352	tags=28%, list=15%, signal=32%
GOCC_MICROBODY	GOCC_MICROBODY	121	0.312002	1.27123	0.127237	0.355834	1	3302	tags=21%, list=22%, signal=26%
GOBP_NEGATIVE_REGULATION_OF_CELL_MIGRATION_INVOLVED_IN_SPROUTING_ANGIOGENESIS	GOBP_NEGATIVE_REGULATION_OF_CELL_MIGRATION_INVOLVED_IN_SPROUTING_ANGIOGENESIS	15	0.512529	1.27122	0.236084	0.35561	1	3857	tags=40%, list=25%, signal=53%
GOBP_ENDOMEMBRANE_SYSTEM_ORGANIZATION	GOBP_ENDOMEMBRANE_SYSTEM_ORGANIZATION	399	0.233669	1.27065	0.0660377	0.356302	1	3346	tags=17%, list=22%, signal=21%
GOBP_PLATELET_DEGRANULATION	GOBP_PLATELET_DEGRANULATION	116	0.417969	1.27023	0.136364	0.356769	1	3536	tags=37%, list=23%, signal=48%
GOCC_CENTRIOLAR_SATELLITE	GOCC_CENTRIOLAR_SATELLITE	98	0.338337	1.27005	0.133466	0.35682	1	2709	tags=24%, list=18%, signal=30%
GOBP_3_UTR_MEDIATED_MRNA_STABILIZATION	GOBP_3_UTR_MEDIATED_MRNA_STABILIZATION	17	0.459459	1.26982	0.178	0.356967	1	4585	tags=41%, list=30%, signal=59%
GOBP_POSITIVE_REGULATION_OF_T_CELL_CYTOKINE_PRODUCTION	GOBP_POSITIVE_REGULATION_OF_T_CELL_CYTOKINE_PRODUCTION	19	0.558014	1.26978	0.20412	0.356815	1	3152	tags=47%, list=21%, signal=60%
GOMF_LIPID_TRANSPORTER_ACTIVITY	GOMF_LIPID_TRANSPORTER_ACTIVITY	145	0.397391	1.26977	0.0894942	0.356595	1	2920	tags=32%, list=19%, signal=40%
GOBP_MATURE_B_CELL_DIFFERENTIATION_INVOLVED_IN_IMMUNE_RESPONSE	GOBP_MATURE_B_CELL_DIFFERENTIATION_INVOLVED_IN_IMMUNE_RESPONSE	26	0.529425	1.26937	0.190751	0.35706	1	3710	tags=50%, list=24%, signal=66%
GOBP_REGULATION_OF_ACUTE_INFLAMMATORY_RESPONSE	GOBP_REGULATION_OF_ACUTE_INFLAMMATORY_RESPONSE	44	0.517452	1.26935	0.12749	0.356856	1	3086	tags=45%, list=20%, signal=57%
GOCC_MYOSIN_II_COMPLEX	GOCC_MYOSIN_II_COMPLEX	19	0.582304	1.26904	0.192385	0.357168	1	4024	tags=53%, list=26%, signal=71%
GOBP_NEGATIVE_REGULATION_OF_PROTEIN_CONTAINING_COMPLEX_DISASSEMBLY	GOBP_NEGATIVE_REGULATION_OF_PROTEIN_CONTAINING_COMPLEX_DISASSEMBLY	70	0.370967	1.2688	0.136719	0.357364	1	3628	tags=37%, list=24%, signal=48%
GOBP_REGULATION_OF_RESPONSE_TO_TUMOR_CELL	GOBP_REGULATION_OF_RESPONSE_TO_TUMOR_CELL	15	0.607267	1.26877	0.199195	0.357185	1	1638	tags=47%, list=11%, signal=52%
GOBP_REGULATION_OF_PROTEIN_ACETYLATION	GOBP_REGULATION_OF_PROTEIN_ACETYLATION	69	0.33914	1.26875	0.0884086	0.356977	1	2609	tags=22%, list=17%, signal=26%
GOMF_HISTONE_ACETYLTRANSFERASE_BINDING	GOMF_HISTONE_ACETYLTRANSFERASE_BINDING	25	0.391118	1.26837	0.20412	0.357388	1	4806	tags=40%, list=31%, signal=58%
GOBP_PROTEIN_TRIMERIZATION	GOBP_PROTEIN_TRIMERIZATION	16	0.505926	1.26797	0.177388	0.357836	1	1804	tags=31%, list=12%, signal=35%
GOBP_RENAL_SYSTEM_VASCULATURE_DEVELOPMENT	GOBP_RENAL_SYSTEM_VASCULATURE_DEVELOPMENT	25	0.557331	1.26786	0.189293	0.357816	1	3604	tags=56%, list=23%, signal=73%
GOBP_REGULATION_OF_DEVELOPMENTAL_GROWTH	GOBP_REGULATION_OF_DEVELOPMENTAL_GROWTH	285	0.365277	1.26763	0.123016	0.357961	1	3572	tags=31%, list=23%, signal=40%
GOBP_RENAL_SYSTEM_PROCESS_INVOLVED_IN_REGULATION_OF_BLOOD_VOLUME	GOBP_RENAL_SYSTEM_PROCESS_INVOLVED_IN_REGULATION_OF_BLOOD_VOLUME	15	0.568694	1.26737	0.173077	0.358174	1	3546	tags=47%, list=23%, signal=61%
GOBP_INTRACELLULAR_STEROID_HORMONE_RECEPTOR_SIGNALING_PATHWAY	GOBP_INTRACELLULAR_STEROID_HORMONE_RECEPTOR_SIGNALING_PATHWAY	101	0.330922	1.26725	0.159091	0.358143	1	2203	tags=14%, list=14%, signal=16%
GOBP_REGULATION_OF_ANATOMICAL_STRUCTURE_SIZE	GOBP_REGULATION_OF_ANATOMICAL_STRUCTURE_SIZE	446	0.355804	1.2671	0.0968992	0.358158	1	3377	tags=29%, list=22%, signal=36%
GOBP_NEGATIVE_REGULATION_OF_HISTONE_ACETYLATION	GOBP_NEGATIVE_REGULATION_OF_HISTONE_ACETYLATION	16	0.468691	1.26668	0.202652	0.358628	1	2032	tags=25%, list=13%, signal=29%
GOBP_NUCLEOSIDE_CATABOLIC_PROCESS	GOBP_NUCLEOSIDE_CATABOLIC_PROCESS	29	0.467476	1.2663	0.158103	0.359082	1	3580	tags=45%, list=23%, signal=58%
GOBP_MAMMARY_GLAND_ALVEOLUS_DEVELOPMENT	GOBP_MAMMARY_GLAND_ALVEOLUS_DEVELOPMENT	17	0.533061	1.26526	0.156313	0.360618	1	3338	tags=53%, list=22%, signal=68%
GOBP_REGULATION_OF_MUSCLE_CONTRACTION	GOBP_REGULATION_OF_MUSCLE_CONTRACTION	143	0.412724	1.26526	0.110687	0.360405	1	2029	tags=24%, list=13%, signal=27%
GOCC_OUTER_MEMBRANE	GOCC_OUTER_MEMBRANE	186	0.263272	1.26504	0.125737	0.360544	1	3175	tags=18%, list=21%, signal=22%
GOBP_CELLULAR_RESPONSE_TO_ETHANOL	GOBP_CELLULAR_RESPONSE_TO_ETHANOL	15	0.523753	1.26502	0.214844	0.360347	1	3027	tags=47%, list=20%, signal=58%
GOBP_REGULATION_OF_PH	GOBP_REGULATION_OF_PH	94	0.359617	1.265	0.111562	0.360149	1	4013	tags=34%, list=26%, signal=46%
GOBP_POSITIVE_REGULATION_OF_GLUCOSE_TRANSMEMBRANE_TRANSPORT	GOBP_POSITIVE_REGULATION_OF_GLUCOSE_TRANSMEMBRANE_TRANSPORT	41	0.402269	1.26473	0.15547	0.360365	1	3144	tags=32%, list=20%, signal=40%
GOBP_ANTIGEN_PROCESSING_AND_PRESENTATION_OF_PEPTIDE_ANTIGEN	GOBP_ANTIGEN_PROCESSING_AND_PRESENTATION_OF_PEPTIDE_ANTIGEN	177	0.314942	1.26472	0.196819	0.360159	1	2230	tags=17%, list=15%, signal=20%
GOBP_POSITIVE_CHEMOTAXIS	GOBP_POSITIVE_CHEMOTAXIS	52	0.485691	1.26458	0.179389	0.360163	1	3403	tags=44%, list=22%, signal=57%
GOBP_CELL_MIGRATION_INVOLVED_IN_SPROUTING_ANGIOGENESIS	GOBP_CELL_MIGRATION_INVOLVED_IN_SPROUTING_ANGIOGENESIS	50	0.454459	1.26423	0.222222	0.360506	1	4392	tags=46%, list=29%, signal=64%
GOCC_LIPID_DROPLET	GOCC_LIPID_DROPLET	86	0.32463	1.2642	0.154297	0.360346	1	3623	tags=27%, list=24%, signal=35%
GOBP_NEGATIVE_REGULATION_OF_HYDROLASE_ACTIVITY	GOBP_NEGATIVE_REGULATION_OF_HYDROLASE_ACTIVITY	388	0.352785	1.26378	0.084507	0.360805	1	3412	tags=31%, list=22%, signal=39%
GOBP_NEGATIVE_REGULATION_OF_STRIATED_MUSCLE_CELL_APOPTOTIC_PROCESS	GOBP_NEGATIVE_REGULATION_OF_STRIATED_MUSCLE_CELL_APOPTOTIC_PROCESS	21	0.49834	1.26363	0.164093	0.360815	1	2566	tags=29%, list=17%, signal=34%
GOBP_POSITIVE_REGULATION_OF_POTASSIUM_ION_TRANSPORT	GOBP_POSITIVE_REGULATION_OF_POTASSIUM_ION_TRANSPORT	39	0.488702	1.26361	0.13215	0.360626	1	1975	tags=36%, list=13%, signal=41%
GOMF_PROTEASE_BINDING	GOMF_PROTEASE_BINDING	121	0.366438	1.26343	0.143411	0.360699	1	2566	tags=20%, list=17%, signal=24%
GOBP_POSITIVE_REGULATION_OF_ANION_TRANSPORT	GOBP_POSITIVE_REGULATION_OF_ANION_TRANSPORT	438	0.30339	1.263	0.0773694	0.361195	1	3166	tags=23%, list=21%, signal=28%
GOBP_REGULATION_OF_PEPTIDASE_ACTIVITY	GOBP_REGULATION_OF_PEPTIDASE_ACTIVITY	393	0.355138	1.26255	0.118852	0.361754	1	3412	tags=32%, list=22%, signal=40%
GOBP_CARDIAC_MUSCLE_CELL_ACTION_POTENTIAL	GOBP_CARDIAC_MUSCLE_CELL_ACTION_POTENTIAL	67	0.457025	1.2616	0.141454	0.363084	1	2010	tags=30%, list=13%, signal=34%
GOBP_POSITIVE_REGULATION_OF_TYPE_2_IMMUNE_RESPONSE	GOBP_POSITIVE_REGULATION_OF_TYPE_2_IMMUNE_RESPONSE	16	0.607735	1.26154	0.208333	0.362961	1	4834	tags=81%, list=31%, signal=118%
GOBP_EMBRYONIC_HEART_TUBE_DEVELOPMENT	GOBP_EMBRYONIC_HEART_TUBE_DEVELOPMENT	71	0.369673	1.26151	0.0985916	0.362775	1	2702	tags=23%, list=18%, signal=27%
GOBP_REGULATION_OF_TUMOR_NECROSIS_FACTOR_MEDIATED_SIGNALING_PATHWAY	GOBP_REGULATION_OF_TUMOR_NECROSIS_FACTOR_MEDIATED_SIGNALING_PATHWAY	52	0.365563	1.26119	0.170923	0.363081	1	2966	tags=25%, list=19%, signal=31%
GOMF_HYDROLASE_ACTIVITY_HYDROLYZING_N_GLYCOSYL_COMPOUNDS	GOMF_HYDROLASE_ACTIVITY_HYDROLYZING_N_GLYCOSYL_COMPOUNDS	35	0.418421	1.26112	0.134653	0.362963	1	2277	tags=31%, list=15%, signal=37%
GOBP_NEGATIVE_REGULATION_OF_B_CELL_ACTIVATION	GOBP_NEGATIVE_REGULATION_OF_B_CELL_ACTIVATION	33	0.506853	1.26057	0.221766	0.363633	1	3199	tags=58%, list=21%, signal=73%
GOBP_REGULATION_OF_HEART_RATE	GOBP_REGULATION_OF_HEART_RATE	88	0.448969	1.25978	0.117202	0.36471	1	2107	tags=27%, list=14%, signal=31%
GOBP_SEMI_LUNAR_VALVE_DEVELOPMENT	GOBP_SEMI_LUNAR_VALVE_DEVELOPMENT	41	0.494566	1.2597	0.201139	0.364619	1	3546	tags=41%, list=23%, signal=54%
GOCC_NBAF_COMPLEX	GOCC_NBAF_COMPLEX	15	0.395245	1.2593	0.2251	0.365095	1	2486	tags=20%, list=16%, signal=24%
GOBP_EXTRINSIC_APOPTOTIC_SIGNALING_PATHWAY	GOBP_EXTRINSIC_APOPTOTIC_SIGNALING_PATHWAY	204	0.343698	1.25893	0.150763	0.365482	1	3211	tags=26%, list=21%, signal=32%
GOBP_AMYLOID_FIBRIL_FORMATION	GOBP_AMYLOID_FIBRIL_FORMATION	21	0.425228	1.25848	0.204198	0.366055	1	2962	tags=33%, list=19%, signal=41%
GOBP_REGULATION_OF_BLOOD_CIRCULATION	GOBP_REGULATION_OF_BLOOD_CIRCULATION	266	0.410878	1.25845	0.0988593	0.365875	1	2107	tags=26%, list=14%, signal=29%
GOBP_LYMPH_VESSEL_MORPHOGENESIS	GOBP_LYMPH_VESSEL_MORPHOGENESIS	21	0.533181	1.25822	0.224409	0.366048	1	3511	tags=43%, list=23%, signal=55%
GOBP_NEGATIVE_REGULATION_OF_BLOOD_VESSEL_ENDOTHELIAL_CELL_MIGRATION	GOBP_NEGATIVE_REGULATION_OF_BLOOD_VESSEL_ENDOTHELIAL_CELL_MIGRATION	34	0.4771	1.25773	0.215686	0.366662	1	4014	tags=50%, list=26%, signal=68%
GOBP_URETER_DEVELOPMENT	GOBP_URETER_DEVELOPMENT	17	0.567655	1.25762	0.139265	0.366613	1	1788	tags=41%, list=12%, signal=47%
GOBP_POSITIVE_REGULATION_OF_CELL_MIGRATION_INVOLVED_IN_SPROUTING_ANGIOGENESIS	GOBP_POSITIVE_REGULATION_OF_CELL_MIGRATION_INVOLVED_IN_SPROUTING_ANGIOGENESIS	19	0.544612	1.25724	0.218	0.366991	1	2330	tags=37%, list=15%, signal=43%
GOBP_NEGATIVE_REGULATION_OF_VASCULAR_ASSOCIATED_SMOOTH_MUSCLE_CELL_PROLIFERATION	GOBP_NEGATIVE_REGULATION_OF_VASCULAR_ASSOCIATED_SMOOTH_MUSCLE_CELL_PROLIFERATION	18	0.577354	1.25713	0.193798	0.366955	1	4227	tags=56%, list=28%, signal=77%
GOBP_MACROAUTOPHAGY	GOBP_MACROAUTOPHAGY	278	0.199431	1.25697	0.146045	0.366997	1	5618	tags=32%, list=37%, signal=49%
GOBP_POSITIVE_REGULATION_OF_ENDOTHELIAL_CELL_PROLIFERATION	GOBP_POSITIVE_REGULATION_OF_ENDOTHELIAL_CELL_PROLIFERATION	83	0.461364	1.25682	0.159309	0.367007	1	3536	tags=40%, list=23%, signal=51%
GOCC_LEADING_EDGE_MEMBRANE	GOCC_LEADING_EDGE_MEMBRANE	160	0.350991	1.25612	0.130268	0.367946	1	3039	tags=27%, list=20%, signal=33%
GOMF_METALLOEXOPEPTIDASE_ACTIVITY	GOMF_METALLOEXOPEPTIDASE_ACTIVITY	57	0.437319	1.25585	0.122951	0.368151	1	2228	tags=26%, list=15%, signal=31%
GOMF_ATPASE_BINDING	GOMF_ATPASE_BINDING	79	0.340503	1.25568	0.14786	0.368224	1	3149	tags=24%, list=21%, signal=30%
GOBP_LIPID_OXIDATION	GOBP_LIPID_OXIDATION	107	0.357227	1.25496	0.126923	0.369274	1	2250	tags=20%, list=15%, signal=23%
GOBP_PULMONARY_VALVE_DEVELOPMENT	GOBP_PULMONARY_VALVE_DEVELOPMENT	21	0.521024	1.2547	0.209073	0.369495	1	5037	tags=71%, list=33%, signal=106%
GOBP_REGULATION_OF_FATTY_ACID_METABOLIC_PROCESS	GOBP_REGULATION_OF_FATTY_ACID_METABOLIC_PROCESS	87	0.356988	1.25451	0.125984	0.36964	1	2920	tags=24%, list=19%, signal=30%
GOBP_REGULATION_OF_CELL_SUBSTRATE_ADHESION	GOBP_REGULATION_OF_CELL_SUBSTRATE_ADHESION	203	0.372042	1.25347	0.179924	0.371129	1	3489	tags=31%, list=23%, signal=40%
GOBP_REGULATION_OF_ANDROGEN_RECEPTOR_SIGNALING_PATHWAY	GOBP_REGULATION_OF_ANDROGEN_RECEPTOR_SIGNALING_PATHWAY	25	0.42541	1.25256	0.183752	0.372375	1	1121	tags=8%, list=7%, signal=9%
GOBP_PYROPTOSIS	GOBP_PYROPTOSIS	16	0.575117	1.2525	0.23	0.372242	1	4141	tags=75%, list=27%, signal=103%
GOBP_POSITIVE_REGULATION_OF_CELL_SUBSTRATE_ADHESION	GOBP_POSITIVE_REGULATION_OF_CELL_SUBSTRATE_ADHESION	116	0.405055	1.25243	0.166031	0.372128	1	3039	tags=29%, list=20%, signal=36%
GOMF_LONG_CHAIN_FATTY_ACID_TRANSPORTER_ACTIVITY	GOMF_LONG_CHAIN_FATTY_ACID_TRANSPORTER_ACTIVITY	17	0.546868	1.25218	0.170732	0.372352	1	2920	tags=59%, list=19%, signal=73%
GOBP_RESPONSE_TO_DSRNA	GOBP_RESPONSE_TO_DSRNA	47	0.360397	1.25214	0.184825	0.372194	1	4316	tags=30%, list=28%, signal=41%
GOBP_NEGATIVE_REGULATION_OF_CALCIUM_ION_TRANSMEMBRANE_TRANSPORTER_ACTIVITY	GOBP_NEGATIVE_REGULATION_OF_CALCIUM_ION_TRANSMEMBRANE_TRANSPORTER_ACTIVITY	28	0.52027	1.25208	0.184314	0.372082	1	1984	tags=25%, list=13%, signal=29%
GOBP_REGULATION_OF_CARDIOCYTE_DIFFERENTIATION	GOBP_REGULATION_OF_CARDIOCYTE_DIFFERENTIATION	25	0.508671	1.25184	0.180747	0.372249	1	3375	tags=52%, list=22%, signal=67%
GOBP_ACTIVATION_OF_JUN_KINASE_ACTIVITY	GOBP_ACTIVATION_OF_JUN_KINASE_ACTIVITY	36	0.380459	1.25166	0.200811	0.372315	1	2994	tags=28%, list=19%, signal=34%
GOBP_NEGATIVE_REGULATION_OF_GROWTH	GOBP_NEGATIVE_REGULATION_OF_GROWTH	222	0.365617	1.25143	0.150289	0.372487	1	3800	tags=37%, list=25%, signal=48%
GOCC_TRIGLYCERIDE_RICH_PLASMA_LIPOPROTEIN_PARTICLE	GOCC_TRIGLYCERIDE_RICH_PLASMA_LIPOPROTEIN_PARTICLE	18	0.540821	1.25138	0.18254	0.372362	1	1532	tags=28%, list=10%, signal=31%
GOMF_SOLUTE_CATION_SYMPORTER_ACTIVITY	GOMF_SOLUTE_CATION_SYMPORTER_ACTIVITY	95	0.435715	1.25131	0.0900196	0.372252	1	1694	tags=21%, list=11%, signal=24%
GOBP_RESPONSE_TO_EPINEPHRINE	GOBP_RESPONSE_TO_EPINEPHRINE	15	0.556565	1.25111	0.204082	0.372348	1	3350	tags=53%, list=22%, signal=68%
GOBP_POSITIVE_REGULATION_OF_PEPTIDYL_SERINE_PHOSPHORYLATION	GOBP_POSITIVE_REGULATION_OF_PEPTIDYL_SERINE_PHOSPHORYLATION	98	0.369488	1.2511	0.122047	0.372142	1	3403	tags=28%, list=22%, signal=35%
GOBP_REGULATION_OF_SYSTEMIC_ARTERIAL_BLOOD_PRESSURE	GOBP_REGULATION_OF_SYSTEMIC_ARTERIAL_BLOOD_PRESSURE	84	0.455144	1.25049	0.119772	0.372919	1	2053	tags=26%, list=13%, signal=30%
GOBP_POSITIVE_REGULATION_OF_LONG_TERM_SYNAPTIC_POTENTIATION	GOBP_POSITIVE_REGULATION_OF_LONG_TERM_SYNAPTIC_POTENTIATION	21	0.49408	1.2497	0.173228	0.374	1	3876	tags=38%, list=25%, signal=51%
GOBP_PHOSPHOLIPID_CATABOLIC_PROCESS	GOBP_PHOSPHOLIPID_CATABOLIC_PROCESS	45	0.423368	1.24902	0.168317	0.374923	1	4349	tags=49%, list=28%, signal=68%
GOBP_CELL_FATE_DETERMINATION	GOBP_CELL_FATE_DETERMINATION	40	0.460124	1.24895	0.140351	0.374818	1	2439	tags=33%, list=16%, signal=39%
GOBP_REGULATION_OF_HEART_CONTRACTION	GOBP_REGULATION_OF_HEART_CONTRACTION	224	0.408388	1.24891	0.111765	0.374649	1	2635	tags=28%, list=17%, signal=33%
GOBP_REGULATION_OF_EXTRACELLULAR_MATRIX_ORGANIZATION	GOBP_REGULATION_OF_EXTRACELLULAR_MATRIX_ORGANIZATION	38	0.480047	1.24881	0.222868	0.374572	1	5429	tags=58%, list=35%, signal=89%
GOBP_GLOMERULAR_EPITHELIAL_CELL_DIFFERENTIATION	GOBP_GLOMERULAR_EPITHELIAL_CELL_DIFFERENTIATION	20	0.508355	1.2486	0.164384	0.374684	1	1829	tags=30%, list=12%, signal=34%
GOBP_BODY_FLUID_SECRETION	GOBP_BODY_FLUID_SECRETION	81	0.384875	1.24856	0.106719	0.374519	1	2686	tags=21%, list=17%, signal=25%
GOMF_PHOSPHATIDYLINOSITOL_PHOSPHATE_BINDING	GOMF_PHOSPHATIDYLINOSITOL_PHOSPHATE_BINDING	152	0.30134	1.2482	0.118343	0.374907	1	4315	tags=33%, list=28%, signal=45%
GOBP_POSITIVE_REGULATION_OF_CANONICAL_WNT_SIGNALING_PATHWAY	GOBP_POSITIVE_REGULATION_OF_CANONICAL_WNT_SIGNALING_PATHWAY	132	0.305945	1.2476	0.152344	0.37575	1	4566	tags=30%, list=30%, signal=42%
GOMF_SYMPORTER_ACTIVITY	GOMF_SYMPORTER_ACTIVITY	132	0.417029	1.24712	0.0946746	0.376351	1	2594	tags=27%, list=17%, signal=33%
GOBP_SMOOTH_MUSCLE_CONTRACTION	GOBP_SMOOTH_MUSCLE_CONTRACTION	91	0.450847	1.24682	0.152672	0.376619	1	2029	tags=27%, list=13%, signal=31%
GOBP_REGULATION_OF_PROTEASOMAL_UBIQUITIN_DEPENDENT_PROTEIN_CATABOLIC_PROCESS	GOBP_REGULATION_OF_PROTEASOMAL_UBIQUITIN_DEPENDENT_PROTEIN_CATABOLIC_PROCESS	117	0.243994	1.24644	0.1611	0.37704	1	1985	tags=11%, list=13%, signal=13%
GOCC_AXONEMAL_DYNEIN_COMPLEX	GOCC_AXONEMAL_DYNEIN_COMPLEX	15	0.713887	1.2463	0.257485	0.377049	1	2131	tags=67%, list=14%, signal=77%
GOBP_REGULATION_OF_LIPID_LOCALIZATION	GOBP_REGULATION_OF_LIPID_LOCALIZATION	161	0.380888	1.24628	0.104418	0.37687	1	3623	tags=33%, list=24%, signal=43%
GOBP_POSITIVE_REGULATION_OF_SPROUTING_ANGIOGENESIS	GOBP_POSITIVE_REGULATION_OF_SPROUTING_ANGIOGENESIS	19	0.48765	1.24623	0.20339	0.37673	1	3513	tags=37%, list=23%, signal=48%
GOMF_ACTIVATING_TRANSCRIPTION_FACTOR_BINDING	GOMF_ACTIVATING_TRANSCRIPTION_FACTOR_BINDING	75	0.345841	1.24623	0.136531	0.376506	1	3301	tags=27%, list=21%, signal=34%
GOBP_PHOSPHATIDYLETHANOLAMINE_ACYL_CHAIN_REMODELING	GOBP_PHOSPHATIDYLETHANOLAMINE_ACYL_CHAIN_REMODELING	21	0.53587	1.24599	0.179134	0.376663	1	3948	tags=57%, list=26%, signal=77%
GOBP_NEGATIVE_REGULATION_OF_CANONICAL_WNT_SIGNALING_PATHWAY	GOBP_NEGATIVE_REGULATION_OF_CANONICAL_WNT_SIGNALING_PATHWAY	162	0.342015	1.24511	0.167939	0.378019	1	3329	tags=25%, list=22%, signal=31%
GOBP_PROTEIN_CATABOLIC_PROCESS_IN_THE_VACUOLE	GOBP_PROTEIN_CATABOLIC_PROCESS_IN_THE_VACUOLE	17	0.478767	1.24472	0.22479	0.378433	1	5945	tags=71%, list=39%, signal=115%
GOBP_ICOSANOID_BIOSYNTHETIC_PROCESS	GOBP_ICOSANOID_BIOSYNTHETIC_PROCESS	44	0.450305	1.24449	0.172816	0.378573	1	3985	tags=43%, list=26%, signal=58%
GOBP_REGULATION_OF_REGULATED_SECRETORY_PATHWAY	GOBP_REGULATION_OF_REGULATED_SECRETORY_PATHWAY	123	0.404949	1.24402	0.146341	0.379111	1	3789	tags=38%, list=25%, signal=50%
GOBP_CELLULAR_BIOGENIC_AMINE_METABOLIC_PROCESS	GOBP_CELLULAR_BIOGENIC_AMINE_METABOLIC_PROCESS	93	0.392695	1.24393	0.104536	0.379033	1	2255	tags=24%, list=15%, signal=28%
GOMF_TRANSMEMBRANE_RECEPTOR_PROTEIN_PHOSPHATASE_ACTIVITY	GOMF_TRANSMEMBRANE_RECEPTOR_PROTEIN_PHOSPHATASE_ACTIVITY	17	0.569765	1.24381	0.203922	0.379018	1	2560	tags=53%, list=17%, signal=63%
GOBP_MODULATION_BY_HOST_OF_VIRAL_PROCESS	GOBP_MODULATION_BY_HOST_OF_VIRAL_PROCESS	28	0.426135	1.24364	0.180392	0.379083	1	3084	tags=29%, list=20%, signal=36%
GOBP_POSITIVE_REGULATION_OF_SMALL_MOLECULE_METABOLIC_PROCESS	GOBP_POSITIVE_REGULATION_OF_SMALL_MOLECULE_METABOLIC_PROCESS	124	0.378852	1.24298	0.106061	0.37993	1	2256	tags=22%, list=15%, signal=25%
GOCC_MYELIN_SHEATH	GOCC_MYELIN_SHEATH	37	0.429925	1.24294	0.204	0.379793	1	3008	tags=27%, list=20%, signal=34%
GOBP_HISTONE_H3_ACETYLATION	GOBP_HISTONE_H3_ACETYLATION	51	0.321312	1.24242	0.160853	0.380399	1	1586	tags=12%, list=10%, signal=13%
GOBP_VASOCONSTRICTION	GOBP_VASOCONSTRICTION	76	0.466416	1.24192	0.129032	0.381042	1	1918	tags=29%, list=12%, signal=33%
GOBP_POSITIVE_REGULATION_OF_MULTI_ORGANISM_PROCESS	GOBP_POSITIVE_REGULATION_OF_MULTI_ORGANISM_PROCESS	17	0.532622	1.24173	0.159681	0.381154	1	2826	tags=41%, list=18%, signal=50%
GOBP_MAMMARY_GLAND_MORPHOGENESIS	GOBP_MAMMARY_GLAND_MORPHOGENESIS	39	0.460895	1.24151	0.201581	0.381318	1	3149	tags=36%, list=21%, signal=45%
GOCC_CILIARY_PLASM	GOCC_CILIARY_PLASM	92	0.545564	1.24129	0.248497	0.381454	1	2735	tags=39%, list=18%, signal=47%
GOBP_MACROMOLECULE_DEACYLATION	GOBP_MACROMOLECULE_DEACYLATION	100	0.254623	1.24083	0.192843	0.382014	1	4236	tags=23%, list=28%, signal=32%
GOBP_POSITIVE_REGULATION_OF_PROTEIN_CONTAINING_COMPLEX_DISASSEMBLY	GOBP_POSITIVE_REGULATION_OF_PROTEIN_CONTAINING_COMPLEX_DISASSEMBLY	26	0.479797	1.24041	0.183865	0.382559	1	2689	tags=35%, list=18%, signal=42%
GOBP_LIPOSACCHARIDE_METABOLIC_PROCESS	GOBP_LIPOSACCHARIDE_METABOLIC_PROCESS	99	0.311547	1.23997	0.133333	0.383087	1	2516	tags=18%, list=16%, signal=22%
GOBP_POSITIVE_REGULATION_OF_GLIAL_CELL_DIFFERENTIATION	GOBP_POSITIVE_REGULATION_OF_GLIAL_CELL_DIFFERENTIATION	40	0.420353	1.23976	0.191033	0.383218	1	3375	tags=30%, list=22%, signal=38%
GOBP_REGULATION_OF_SODIUM_ION_TRANSMEMBRANE_TRANSPORTER_ACTIVITY	GOBP_REGULATION_OF_SODIUM_ION_TRANSMEMBRANE_TRANSPORTER_ACTIVITY	51	0.449316	1.23919	0.169697	0.383941	1	3472	tags=45%, list=23%, signal=58%
GOMF_GTPASE_ACTIVITY	GOMF_GTPASE_ACTIVITY	271	0.288458	1.23879	0.118738	0.384406	1	3138	tags=19%, list=20%, signal=24%
GOBP_POSITIVE_REGULATION_OF_NEUTROPHIL_MIGRATION	GOBP_POSITIVE_REGULATION_OF_NEUTROPHIL_MIGRATION	27	0.487015	1.23873	0.208835	0.384301	1	3341	tags=44%, list=22%, signal=57%
GOBP_LIPID_CATABOLIC_PROCESS	GOBP_LIPID_CATABOLIC_PROCESS	305	0.341633	1.23836	0.130435	0.384702	1	3497	tags=31%, list=23%, signal=39%
GOBP_CELL_SUBSTRATE_JUNCTION_ORGANIZATION	GOBP_CELL_SUBSTRATE_JUNCTION_ORGANIZATION	104	0.375147	1.23807	0.211765	0.384993	1	4821	tags=43%, list=31%, signal=63%
GOBP_NEURON_PROJECTION_ORGANIZATION	GOBP_NEURON_PROJECTION_ORGANIZATION	84	0.367327	1.23764	0.160853	0.385505	1	3114	tags=25%, list=20%, signal=31%
GOBP_ARP2_3_COMPLEX_MEDIATED_ACTIN_NUCLEATION	GOBP_ARP2_3_COMPLEX_MEDIATED_ACTIN_NUCLEATION	33	0.329738	1.2375	0.227006	0.385483	1	2514	tags=15%, list=16%, signal=18%
GOBP_POSITIVE_REGULATION_OF_RESPONSE_TO_WOUNDING	GOBP_POSITIVE_REGULATION_OF_RESPONSE_TO_WOUNDING	62	0.426914	1.23738	0.173489	0.385442	1	3346	tags=37%, list=22%, signal=47%
GOBP_NEGATIVE_REGULATION_OF_RELEASE_OF_CYTOCHROME_C_FROM_MITOCHONDRIA	GOBP_NEGATIVE_REGULATION_OF_RELEASE_OF_CYTOCHROME_C_FROM_MITOCHONDRIA	15	0.406518	1.23732	0.235409	0.385318	1	2862	tags=27%, list=19%, signal=33%
GOBP_MICROTUBULE_BUNDLE_FORMATION	GOBP_MICROTUBULE_BUNDLE_FORMATION	70	0.556687	1.23698	0.254473	0.385642	1	2388	tags=43%, list=16%, signal=51%
GOBP_NEGATIVE_REGULATION_OF_RESPONSE_TO_CYTOKINE_STIMULUS	GOBP_NEGATIVE_REGULATION_OF_RESPONSE_TO_CYTOKINE_STIMULUS	56	0.428461	1.23619	0.206287	0.38681	1	4279	tags=39%, list=28%, signal=54%
GOBP_CHONDROITIN_SULFATE_PROTEOGLYCAN_METABOLIC_PROCESS	GOBP_CHONDROITIN_SULFATE_PROTEOGLYCAN_METABOLIC_PROCESS	41	0.450156	1.23612	0.188825	0.386715	1	3939	tags=39%, list=26%, signal=52%
GOBP_RESPONSE_TO_ORGANOPHOSPHORUS	GOBP_RESPONSE_TO_ORGANOPHOSPHORUS	124	0.387238	1.23609	0.121032	0.386531	1	2140	tags=26%, list=14%, signal=30%
GOMF_ACTIVE_TRANSMEMBRANE_TRANSPORTER_ACTIVITY	GOMF_ACTIVE_TRANSMEMBRANE_TRANSPORTER_ACTIVITY	278	0.374644	1.23579	0.0892857	0.386805	1	2974	tags=27%, list=19%, signal=33%
GOBP_PLASMA_LIPOPROTEIN_PARTICLE_CLEARANCE	GOBP_PLASMA_LIPOPROTEIN_PARTICLE_CLEARANCE	50	0.429555	1.23525	0.173913	0.387504	1	2773	tags=30%, list=18%, signal=36%
GOBP_RENAL_WATER_HOMEOSTASIS	GOBP_RENAL_WATER_HOMEOSTASIS	38	0.421044	1.23523	0.155819	0.387319	1	4577	tags=45%, list=30%, signal=64%
GOBP_SMOOTH_MUSCLE_CELL_DIFFERENTIATION	GOBP_SMOOTH_MUSCLE_CELL_DIFFERENTIATION	53	0.437764	1.235	0.186	0.387471	1	5056	tags=55%, list=33%, signal=81%
GOMF_CYTOKINE_ACTIVITY	GOMF_CYTOKINE_ACTIVITY	204	0.447427	1.23485	0.130859	0.38749	1	3258	tags=38%, list=21%, signal=48%
GOBP_NEGATIVE_REGULATION_OF_SIGNAL_TRANSDUCTION_IN_ABSENCE_OF_LIGAND	GOBP_NEGATIVE_REGULATION_OF_SIGNAL_TRANSDUCTION_IN_ABSENCE_OF_LIGAND	30	0.492728	1.23459	0.17451	0.387678	1	2609	tags=30%, list=17%, signal=36%
GOBP_NEGATIVE_REGULATION_OF_CELL_SUBSTRATE_ADHESION	GOBP_NEGATIVE_REGULATION_OF_CELL_SUBSTRATE_ADHESION	57	0.407552	1.23432	0.209615	0.38791	1	3213	tags=30%, list=21%, signal=38%
GOMF_GUANYL_NUCLEOTIDE_BINDING	GOMF_GUANYL_NUCLEOTIDE_BINDING	331	0.279984	1.23405	0.102662	0.388133	1	3507	tags=23%, list=23%, signal=29%
GOBP_CHOLESTEROL_EFFLUX	GOBP_CHOLESTEROL_EFFLUX	49	0.415081	1.234	0.138	0.387987	1	4237	tags=45%, list=28%, signal=62%
GOBP_PHOSPHATIDYLGLYCEROL_METABOLIC_PROCESS	GOBP_PHOSPHATIDYLGLYCEROL_METABOLIC_PROCESS	34	0.457827	1.23375	0.186373	0.38818	1	3948	tags=38%, list=26%, signal=51%
GOBP_DEVELOPMENTAL_MATURATION	GOBP_DEVELOPMENTAL_MATURATION	241	0.360274	1.23346	0.0991903	0.388441	1	1863	tags=20%, list=12%, signal=23%
GOBP_ENDOTHELIUM_DEVELOPMENT	GOBP_ENDOTHELIUM_DEVELOPMENT	121	0.386052	1.23346	0.189349	0.388219	1	3597	tags=35%, list=23%, signal=45%
GOBP_CYTOKINE_PRODUCTION_INVOLVED_IN_INFLAMMATORY_RESPONSE	GOBP_CYTOKINE_PRODUCTION_INVOLVED_IN_INFLAMMATORY_RESPONSE	47	0.460625	1.23299	0.19295	0.388828	1	4651	tags=55%, list=30%, signal=79%
GOMF_ALCOHOL_BINDING	GOMF_ALCOHOL_BINDING	86	0.371206	1.23276	0.112	0.388995	1	2833	tags=30%, list=18%, signal=37%
GOBP_CEREBELLAR_CORTEX_FORMATION	GOBP_CEREBELLAR_CORTEX_FORMATION	19	0.477447	1.23266	0.188235	0.388941	1	3586	tags=37%, list=23%, signal=48%
GOMF_ACTIVIN_BINDING	GOMF_ACTIVIN_BINDING	15	0.487977	1.23215	0.249027	0.389593	1	2491	tags=33%, list=16%, signal=40%
GOBP_POSITIVE_REGULATION_OF_EXTRACELLULAR_MATRIX_ORGANIZATION	GOBP_POSITIVE_REGULATION_OF_EXTRACELLULAR_MATRIX_ORGANIZATION	18	0.536273	1.23173	0.239923	0.390087	1	5429	tags=61%, list=35%, signal=94%
GOBP_REGULATION_OF_SYNAPTIC_PLASTICITY	GOBP_REGULATION_OF_SYNAPTIC_PLASTICITY	163	0.408094	1.23157	0.162745	0.390156	1	3515	tags=33%, list=23%, signal=42%
GOBP_CELL_COMMUNICATION_INVOLVED_IN_CARDIAC_CONDUCTION	GOBP_CELL_COMMUNICATION_INVOLVED_IN_CARDIAC_CONDUCTION	51	0.484371	1.23151	0.183594	0.390013	1	2601	tags=33%, list=17%, signal=40%
GOBP_RESPONSE_TO_AXON_INJURY	GOBP_RESPONSE_TO_AXON_INJURY	69	0.372221	1.23145	0.143403	0.389867	1	4295	tags=39%, list=28%, signal=54%
GOMF_BICARBONATE_TRANSMEMBRANE_TRANSPORTER_ACTIVITY	GOMF_BICARBONATE_TRANSMEMBRANE_TRANSPORTER_ACTIVITY	20	0.53862	1.23141	0.172962	0.389706	1	1691	tags=35%, list=11%, signal=39%
GOBP_CELLULAR_RESPONSE_TO_OSMOTIC_STRESS	GOBP_CELLULAR_RESPONSE_TO_OSMOTIC_STRESS	38	0.367131	1.23095	0.179537	0.39026	1	1994	tags=18%, list=13%, signal=21%
GOBP_NEGATIVE_REGULATION_OF_TRANSMEMBRANE_TRANSPORT	GOBP_NEGATIVE_REGULATION_OF_TRANSMEMBRANE_TRANSPORT	100	0.390617	1.2307	0.152542	0.390467	1	1648	tags=18%, list=11%, signal=20%
GOBP_FOREBRAIN_NEURON_DEVELOPMENT	GOBP_FOREBRAIN_NEURON_DEVELOPMENT	25	0.470356	1.23027	0.177824	0.390981	1	2686	tags=28%, list=17%, signal=34%
GOBP_LIPID_LOCALIZATION	GOBP_LIPID_LOCALIZATION	448	0.346436	1.23025	0.0970297	0.390786	1	2881	tags=25%, list=19%, signal=30%
GOBP_LYMPHANGIOGENESIS	GOBP_LYMPHANGIOGENESIS	17	0.557111	1.22974	0.260038	0.39137	1	4023	tags=53%, list=26%, signal=72%
GOBP_REGULATION_OF_GLUCOSE_TRANSMEMBRANE_TRANSPORT	GOBP_REGULATION_OF_GLUCOSE_TRANSMEMBRANE_TRANSPORT	66	0.385273	1.22972	0.163148	0.391181	1	2920	tags=30%, list=19%, signal=37%
GOBP_POSITIVE_REGULATION_OF_ESTABLISHMENT_OF_PROTEIN_LOCALIZATION	GOBP_POSITIVE_REGULATION_OF_ESTABLISHMENT_OF_PROTEIN_LOCALIZATION	297	0.269636	1.22963	0.12549	0.391111	1	3128	tags=19%, list=20%, signal=24%
GOBP_CALCIUM_ION_IMPORT_INTO_CYTOSOL	GOBP_CALCIUM_ION_IMPORT_INTO_CYTOSOL	21	0.496683	1.22951	0.182	0.391095	1	2359	tags=33%, list=15%, signal=39%
GOBP_NEGATIVE_REGULATION_OF_CELLULAR_AMIDE_METABOLIC_PROCESS	GOBP_NEGATIVE_REGULATION_OF_CELLULAR_AMIDE_METABOLIC_PROCESS	143	0.250281	1.22931	0.172211	0.391183	1	4367	tags=26%, list=28%, signal=36%
GOBP_REGULATION_OF_CARDIAC_MUSCLE_CONTRACTION	GOBP_REGULATION_OF_CARDIAC_MUSCLE_CONTRACTION	69	0.397612	1.22922	0.138577	0.391124	1	2010	tags=23%, list=13%, signal=27%
GOBP_CYTOPLASMIC_MICROTUBULE_ORGANIZATION	GOBP_CYTOPLASMIC_MICROTUBULE_ORGANIZATION	57	0.317557	1.22889	0.206897	0.391462	1	3809	tags=26%, list=25%, signal=35%
GOBP_PINOCYTOSIS	GOBP_PINOCYTOSIS	21	0.410815	1.22817	0.260081	0.392525	1	4651	tags=48%, list=30%, signal=68%
GOBP_EPITHELIAL_TUBE_MORPHOGENESIS	GOBP_EPITHELIAL_TUBE_MORPHOGENESIS	301	0.343589	1.2266	0.130268	0.395032	1	2524	tags=22%, list=16%, signal=26%
GOBP_RESPONSE_TO_INSULIN	GOBP_RESPONSE_TO_INSULIN	253	0.285179	1.22635	0.121442	0.395237	1	4329	tags=32%, list=28%, signal=44%
GOBP_NEGATIVE_REGULATION_OF_MYELOID_CELL_DIFFERENTIATION	GOBP_NEGATIVE_REGULATION_OF_MYELOID_CELL_DIFFERENTIATION	72	0.392308	1.22624	0.184158	0.395205	1	3909	tags=40%, list=25%, signal=54%
GOBP_POSITIVE_REGULATION_OF_LIPID_STORAGE	GOBP_POSITIVE_REGULATION_OF_LIPID_STORAGE	24	0.453339	1.22619	0.217726	0.395064	1	3927	tags=46%, list=26%, signal=61%
GOBP_REGULATION_OF_SMAD_PROTEIN_SIGNAL_TRANSDUCTION	GOBP_REGULATION_OF_SMAD_PROTEIN_SIGNAL_TRANSDUCTION	25	0.439209	1.22616	0.180162	0.394916	1	1651	tags=20%, list=11%, signal=22%
GOMF_PHOSPHATIDYLINOSITOL_5_PHOSPHATE_BINDING	GOMF_PHOSPHATIDYLINOSITOL_5_PHOSPHATE_BINDING	15	0.46493	1.22612	0.185185	0.394751	1	12	tags=7%, list=0%, signal=7%
GOBP_REGULATION_OF_PROTEIN_BINDING	GOBP_REGULATION_OF_PROTEIN_BINDING	183	0.319801	1.22579	0.167984	0.395074	1	2790	tags=21%, list=18%, signal=25%
GOBP_MODULATION_OF_PROCESS_OF_OTHER_ORGANISM	GOBP_MODULATION_OF_PROCESS_OF_OTHER_ORGANISM	111	0.347383	1.22579	0.174081	0.394847	1	4337	tags=33%, list=28%, signal=46%
GOBP_POSITIVE_REGULATION_OF_WNT_SIGNALING_PATHWAY	GOBP_POSITIVE_REGULATION_OF_WNT_SIGNALING_PATHWAY	161	0.302726	1.22565	0.164729	0.394882	1	3375	tags=22%, list=22%, signal=28%
GOBP_RESPONSE_TO_TEMPERATURE_STIMULUS	GOBP_RESPONSE_TO_TEMPERATURE_STIMULUS	205	0.293233	1.22562	0.13308	0.394712	1	3234	tags=20%, list=21%, signal=24%
GOBP_VACUOLAR_TRANSPORT	GOBP_VACUOLAR_TRANSPORT	141	0.240409	1.22519	0.216963	0.395273	1	6099	tags=41%, list=40%, signal=68%
GOBP_CILIUM_ORGANIZATION	GOBP_CILIUM_ORGANIZATION	328	0.384043	1.22495	0.258197	0.395484	1	3680	tags=31%, list=24%, signal=40%
GOMF_CATION_CHANNEL_ACTIVITY	GOMF_CATION_CHANNEL_ACTIVITY	288	0.39282	1.22436	0.0983607	0.396251	1	2765	tags=26%, list=18%, signal=31%
GOBP_RESPONSE_TO_FIBROBLAST_GROWTH_FACTOR	GOBP_RESPONSE_TO_FIBROBLAST_GROWTH_FACTOR	130	0.356211	1.22427	0.138258	0.396173	1	1917	tags=18%, list=12%, signal=20%
GOBP_XENOBIOTIC_TRANSPORT	GOBP_XENOBIOTIC_TRANSPORT	39	0.450165	1.22414	0.176715	0.396183	1	3033	tags=36%, list=20%, signal=45%
GOBP_EPITHELIAL_CELL_DIFFERENTIATION_INVOLVED_IN_KIDNEY_DEVELOPMENT	GOBP_EPITHELIAL_CELL_DIFFERENTIATION_INVOLVED_IN_KIDNEY_DEVELOPMENT	46	0.440331	1.22403	0.165049	0.396129	1	1829	tags=26%, list=12%, signal=30%
GOBP_REGULATION_OF_WNT_SIGNALING_PATHWAY	GOBP_REGULATION_OF_WNT_SIGNALING_PATHWAY	325	0.31261	1.22396	0.161597	0.396033	1	3375	tags=25%, list=22%, signal=31%
GOBP_NEUROTROPHIN_TRK_RECEPTOR_SIGNALING_PATHWAY	GOBP_NEUROTROPHIN_TRK_RECEPTOR_SIGNALING_PATHWAY	31	0.48327	1.22389	0.207843	0.395939	1	3403	tags=39%, list=22%, signal=50%
GOMF_METAL_ION_TRANSMEMBRANE_TRANSPORTER_ACTIVITY	GOMF_METAL_ION_TRANSMEMBRANE_TRANSPORTER_ACTIVITY	397	0.377603	1.2236	0.0888889	0.396198	1	2765	tags=24%, list=18%, signal=28%
GOBP_CELLULAR_RESPONSE_TO_ALKALOID	GOBP_CELLULAR_RESPONSE_TO_ALKALOID	30	0.461457	1.22318	0.169661	0.396717	1	1241	tags=23%, list=8%, signal=25%
GOBP_MUCOPOLYSACCHARIDE_METABOLIC_PROCESS	GOBP_MUCOPOLYSACCHARIDE_METABOLIC_PROCESS	110	0.400042	1.22289	0.188082	0.396987	1	3453	tags=34%, list=22%, signal=43%
GOBP_POST_EMBRYONIC_DEVELOPMENT	GOBP_POST_EMBRYONIC_DEVELOPMENT	72	0.341634	1.22286	0.157171	0.39683	1	2906	tags=22%, list=19%, signal=27%
GOBP_HETEROTYPIC_CELL_CELL_ADHESION	GOBP_HETEROTYPIC_CELL_CELL_ADHESION	57	0.470017	1.22274	0.207101	0.39679	1	2762	tags=42%, list=18%, signal=51%
GOBP_GLYCEROLIPID_CATABOLIC_PROCESS	GOBP_GLYCEROLIPID_CATABOLIC_PROCESS	67	0.42566	1.22265	0.170974	0.396729	1	3082	tags=37%, list=20%, signal=46%
GOCC_CELL_CELL_JUNCTION	GOCC_CELL_CELL_JUNCTION	449	0.331346	1.22238	0.132296	0.396923	1	3546	tags=28%, list=23%, signal=35%
GOBP_PEPTIDYL_SERINE_MODIFICATION	GOBP_PEPTIDYL_SERINE_MODIFICATION	305	0.285508	1.22219	0.114786	0.397023	1	3417	tags=24%, list=22%, signal=31%
GOBP_TRIGLYCERIDE_METABOLIC_PROCESS	GOBP_TRIGLYCERIDE_METABOLIC_PROCESS	93	0.405617	1.22142	0.150685	0.398101	1	2920	tags=31%, list=19%, signal=38%
GOBP_PEPTIDE_CATABOLIC_PROCESS	GOBP_PEPTIDE_CATABOLIC_PROCESS	22	0.443821	1.22137	0.190381	0.397954	1	2271	tags=36%, list=15%, signal=43%
GOBP_NEGATIVE_REGULATION_OF_ERBB_SIGNALING_PATHWAY	GOBP_NEGATIVE_REGULATION_OF_ERBB_SIGNALING_PATHWAY	49	0.330453	1.22118	0.221739	0.398027	1	4010	tags=35%, list=26%, signal=47%
GOBP_ACTIVATION_OF_MAPK_ACTIVITY	GOBP_ACTIVATION_OF_MAPK_ACTIVITY	141	0.340187	1.221	0.129482	0.398124	1	3403	tags=28%, list=22%, signal=35%
GOBP_AMEBOIDAL_TYPE_CELL_MIGRATION	GOBP_AMEBOIDAL_TYPE_CELL_MIGRATION	384	0.344445	1.22099	0.175238	0.397906	1	3785	tags=33%, list=25%, signal=43%
GOBP_NEGATIVE_REGULATION_OF_PROTEIN_SERINE_THREONINE_KINASE_ACTIVITY	GOBP_NEGATIVE_REGULATION_OF_PROTEIN_SERINE_THREONINE_KINASE_ACTIVITY	128	0.330606	1.22053	0.169261	0.398455	1	3603	tags=31%, list=23%, signal=40%
GOCC_CYTOPLASMIC_DYNEIN_COMPLEX	GOCC_CYTOPLASMIC_DYNEIN_COMPLEX	18	0.424484	1.22045	0.232465	0.398335	1	1031	tags=11%, list=7%, signal=12%
GOMF_NUCLEAR_RECEPTOR_COACTIVATOR_ACTIVITY	GOMF_NUCLEAR_RECEPTOR_COACTIVATOR_ACTIVITY	51	0.286021	1.22036	0.251462	0.398276	1	2140	tags=10%, list=14%, signal=11%
GOBP_CARDIAC_MUSCLE_CONTRACTION	GOBP_CARDIAC_MUSCLE_CONTRACTION	123	0.408697	1.22033	0.175197	0.398087	1	3752	tags=37%, list=24%, signal=48%
GOBP_HYDROGEN_PEROXIDE_CATABOLIC_PROCESS	GOBP_HYDROGEN_PEROXIDE_CATABOLIC_PROCESS	25	0.47978	1.22031	0.206049	0.397892	1	2624	tags=24%, list=17%, signal=29%
GOBP_NEGATIVE_CHEMOTAXIS	GOBP_NEGATIVE_CHEMOTAXIS	46	0.483065	1.22025	0.210101	0.397774	1	1701	tags=24%, list=11%, signal=27%
GOBP_NEGATIVE_REGULATION_OF_SYSTEMIC_ARTERIAL_BLOOD_PRESSURE	GOBP_NEGATIVE_REGULATION_OF_SYSTEMIC_ARTERIAL_BLOOD_PRESSURE	16	0.531487	1.21996	0.204678	0.398044	1	704	tags=31%, list=5%, signal=33%
GOBP_RESPONSE_TO_FUNGUS	GOBP_RESPONSE_TO_FUNGUS	45	0.462719	1.2196	0.18664	0.39841	1	2842	tags=31%, list=19%, signal=38%
GOBP_CANONICAL_WNT_SIGNALING_PATHWAY	GOBP_CANONICAL_WNT_SIGNALING_PATHWAY	302	0.319865	1.21957	0.169202	0.398229	1	3375	tags=24%, list=22%, signal=30%
GOMF_LYSOPHOSPHOLIPASE_ACTIVITY	GOMF_LYSOPHOSPHOLIPASE_ACTIVITY	23	0.450041	1.21939	0.183716	0.398296	1	3468	tags=43%, list=23%, signal=56%
GOBP_FATTY_ACID_BIOSYNTHETIC_PROCESS	GOBP_FATTY_ACID_BIOSYNTHETIC_PROCESS	146	0.357158	1.21934	0.141129	0.398167	1	2920	tags=25%, list=19%, signal=30%
GOBP_MEMORY	GOBP_MEMORY	101	0.408012	1.21912	0.169231	0.398319	1	3036	tags=29%, list=20%, signal=36%
GOCC_PLASMA_MEMBRANE_BOUNDED_CELL_PROJECTION_CYTOPLASM	GOCC_PLASMA_MEMBRANE_BOUNDED_CELL_PROJECTION_CYTOPLASM	171	0.426286	1.21813	0.236473	0.399793	1	3372	tags=30%, list=22%, signal=39%
GOBP_NEGATIVE_REGULATION_OF_ATPASE_ACTIVITY	GOBP_NEGATIVE_REGULATION_OF_ATPASE_ACTIVITY	15	0.484344	1.21813	0.194779	0.399573	1	1845	tags=27%, list=12%, signal=30%
GOBP_CARDIOBLAST_DIFFERENTIATION	GOBP_CARDIOBLAST_DIFFERENTIATION	16	0.528046	1.21806	0.220039	0.39948	1	1900	tags=38%, list=12%, signal=43%
GOCC_FILOPODIUM	GOCC_FILOPODIUM	91	0.359388	1.21799	0.171079	0.399378	1	3114	tags=31%, list=20%, signal=38%
GOBP_CELL_CELL_ADHESION_VIA_PLASMA_MEMBRANE_ADHESION_MOLECULES	GOBP_CELL_CELL_ADHESION_VIA_PLASMA_MEMBRANE_ADHESION_MOLECULES	232	0.430015	1.21674	0.137177	0.40138	1	2790	tags=30%, list=18%, signal=36%
GOCC_CLATHRIN_COATED_PIT	GOCC_CLATHRIN_COATED_PIT	69	0.312649	1.21657	0.16129	0.401442	1	3472	tags=29%, list=23%, signal=37%
GOBP_CELLULAR_RESPONSE_TO_HEAT	GOBP_CELLULAR_RESPONSE_TO_HEAT	104	0.260351	1.21639	0.209393	0.401537	1	2157	tags=10%, list=14%, signal=11%
GOBP_NEGATIVE_REGULATION_OF_ESTABLISHMENT_OF_PROTEIN_LOCALIZATION	GOBP_NEGATIVE_REGULATION_OF_ESTABLISHMENT_OF_PROTEIN_LOCALIZATION	108	0.335915	1.21637	0.176817	0.401333	1	2989	tags=19%, list=19%, signal=23%
GOBP_NEGATIVE_REGULATION_OF_CALCIUM_ION_TRANSMEMBRANE_TRANSPORT	GOBP_NEGATIVE_REGULATION_OF_CALCIUM_ION_TRANSMEMBRANE_TRANSPORT	32	0.476531	1.21632	0.200389	0.401191	1	650	tags=16%, list=4%, signal=16%
GOBP_NEGATIVE_REGULATION_OF_ANION_TRANSPORT	GOBP_NEGATIVE_REGULATION_OF_ANION_TRANSPORT	178	0.359849	1.21622	0.159136	0.401145	1	3838	tags=27%, list=25%, signal=36%
GOBP_NEGATIVE_REGULATION_OF_CHEMOTAXIS	GOBP_NEGATIVE_REGULATION_OF_CHEMOTAXIS	49	0.448976	1.21613	0.195736	0.401066	1	3115	tags=43%, list=20%, signal=54%
GOBP_FATTY_ACID_BETA_OXIDATION	GOBP_FATTY_ACID_BETA_OXIDATION	72	0.323899	1.21613	0.184906	0.400844	1	3632	tags=24%, list=24%, signal=31%
GOMF_PHOSPHOLIPASE_A2_ACTIVITY_CONSUMING_1_2_DIPALMITOYLPHOSPHATIDYLCHOLINE	GOMF_PHOSPHOLIPASE_A2_ACTIVITY_CONSUMING_1_2_DIPALMITOYLPHOSPHATIDYLCHOLINE	18	0.559378	1.21594	0.213307	0.400932	1	3948	tags=61%, list=26%, signal=82%
GOBP_RESPONSE_TO_REACTIVE_OXYGEN_SPECIES	GOBP_RESPONSE_TO_REACTIVE_OXYGEN_SPECIES	197	0.321538	1.21521	0.184466	0.401935	1	3497	tags=29%, list=23%, signal=38%
GOMF_SINGLE_STRANDED_RNA_BINDING	GOMF_SINGLE_STRANDED_RNA_BINDING	79	0.319418	1.21501	0.179074	0.402059	1	2965	tags=20%, list=19%, signal=25%
GOBP_POSITIVE_REGULATION_OF_AXONOGENESIS	GOBP_POSITIVE_REGULATION_OF_AXONOGENESIS	73	0.39433	1.21483	0.206186	0.402147	1	3309	tags=29%, list=22%, signal=36%
GOBP_NEGATIVE_REGULATION_OF_CATION_TRANSMEMBRANE_TRANSPORT	GOBP_NEGATIVE_REGULATION_OF_CATION_TRANSMEMBRANE_TRANSPORT	74	0.415812	1.21459	0.189655	0.402341	1	1648	tags=20%, list=11%, signal=23%
GOBP_GRANULOCYTE_MACROPHAGE_COLONY_STIMULATING_FACTOR_PRODUCTION	GOBP_GRANULOCYTE_MACROPHAGE_COLONY_STIMULATING_FACTOR_PRODUCTION	16	0.571298	1.21413	0.220676	0.402953	1	2923	tags=56%, list=19%, signal=69%
GOBP_RESPONSE_TO_ESTROGEN	GOBP_RESPONSE_TO_ESTROGEN	66	0.401437	1.21397	0.155206	0.403003	1	2833	tags=33%, list=18%, signal=41%
GOBP_BICARBONATE_TRANSPORT	GOBP_BICARBONATE_TRANSPORT	40	0.489297	1.21361	0.168297	0.403402	1	1691	tags=35%, list=11%, signal=39%
GOBP_REGULATION_OF_MEGAKARYOCYTE_DIFFERENTIATION	GOBP_REGULATION_OF_MEGAKARYOCYTE_DIFFERENTIATION	42	0.370337	1.21355	0.186508	0.403264	1	1595	tags=17%, list=10%, signal=19%
GOBP_REGULATION_OF_LIPID_TRANSPORT	GOBP_REGULATION_OF_LIPID_TRANSPORT	131	0.378898	1.21317	0.119433	0.403699	1	3166	tags=30%, list=21%, signal=37%
GOCC_SPECIFIC_GRANULE_LUMEN	GOCC_SPECIFIC_GRANULE_LUMEN	55	0.44831	1.21315	0.217304	0.403498	1	2560	tags=29%, list=17%, signal=35%
GOMF_ALPHA_TUBULIN_BINDING	GOMF_ALPHA_TUBULIN_BINDING	33	0.433168	1.21304	0.240404	0.403458	1	2755	tags=24%, list=18%, signal=29%
GOBP_INTERLEUKIN_17_PRODUCTION	GOBP_INTERLEUKIN_17_PRODUCTION	34	0.527078	1.21298	0.243137	0.403337	1	3695	tags=56%, list=24%, signal=73%
GOBP_CARDIAC_CHAMBER_MORPHOGENESIS	GOBP_CARDIAC_CHAMBER_MORPHOGENESIS	110	0.412356	1.21261	0.18591	0.403769	1	3511	tags=37%, list=23%, signal=48%
GOCC_9PLUS2_MOTILE_CILIUM	GOCC_9PLUS2_MOTILE_CILIUM	86	0.472284	1.21246	0.225	0.403795	1	3350	tags=37%, list=22%, signal=47%
GOBP_REGULATION_OF_FIBROBLAST_GROWTH_FACTOR_RECEPTOR_SIGNALING_PATHWAY	GOBP_REGULATION_OF_FIBROBLAST_GROWTH_FACTOR_RECEPTOR_SIGNALING_PATHWAY	27	0.497373	1.21227	0.203422	0.403896	1	1553	tags=22%, list=10%, signal=25%
GOBP_CELLULAR_RESPONSE_TO_VITAMIN	GOBP_CELLULAR_RESPONSE_TO_VITAMIN	28	0.487153	1.2121	0.2	0.403955	1	1872	tags=32%, list=12%, signal=37%
GOBP_POSITIVE_REGULATION_OF_P38MAPK_CASCADE	GOBP_POSITIVE_REGULATION_OF_P38MAPK_CASCADE	24	0.488942	1.21208	0.227099	0.403771	1	2994	tags=46%, list=19%, signal=57%
GOBP_LOCALIZATION_WITHIN_MEMBRANE	GOBP_LOCALIZATION_WITHIN_MEMBRANE	71	0.38481	1.21174	0.182365	0.404152	1	3385	tags=31%, list=22%, signal=40%
GOBP_PROTEIN_COMPLEX_OLIGOMERIZATION	GOBP_PROTEIN_COMPLEX_OLIGOMERIZATION	215	0.303642	1.21166	0.114786	0.404073	1	3623	tags=25%, list=24%, signal=32%
GOBP_MYELIN_ASSEMBLY	GOBP_MYELIN_ASSEMBLY	16	0.439491	1.2116	0.211132	0.403929	1	2852	tags=31%, list=19%, signal=38%
GOMF_STEROID_HYDROXYLASE_ACTIVITY	GOMF_STEROID_HYDROXYLASE_ACTIVITY	32	0.542102	1.21046	0.200765	0.405678	1	4344	tags=53%, list=28%, signal=74%
GOBP_POSITIVE_REGULATION_OF_LEUKOCYTE_APOPTOTIC_PROCESS	GOBP_POSITIVE_REGULATION_OF_LEUKOCYTE_APOPTOTIC_PROCESS	22	0.463412	1.21042	0.240741	0.405535	1	3950	tags=41%, list=26%, signal=55%
GOMF_MHC_PROTEIN_BINDING	GOMF_MHC_PROTEIN_BINDING	24	0.546785	1.21011	0.297143	0.405829	1	4993	tags=67%, list=33%, signal=99%
GOCC_SARCOPLASMIC_RETICULUM_MEMBRANE	GOCC_SARCOPLASMIC_RETICULUM_MEMBRANE	36	0.480867	1.20975	0.195565	0.40622	1	2063	tags=28%, list=13%, signal=32%
GOCC_SCHAFFER_COLLATERAL_CA1_SYNAPSE	GOCC_SCHAFFER_COLLATERAL_CA1_SYNAPSE	64	0.441799	1.2094	0.214008	0.406641	1	3884	tags=34%, list=25%, signal=46%
GOBP_MESODERM_DEVELOPMENT	GOBP_MESODERM_DEVELOPMENT	105	0.369833	1.20858	0.15739	0.407862	1	3350	tags=28%, list=22%, signal=35%
GOBP_NEGATIVE_REGULATION_OF_EPITHELIAL_CELL_MIGRATION	GOBP_NEGATIVE_REGULATION_OF_EPITHELIAL_CELL_MIGRATION	67	0.387108	1.2082	0.21374	0.408298	1	3375	tags=36%, list=22%, signal=46%
GOBP_MAMMARY_GLAND_DUCT_MORPHOGENESIS	GOBP_MAMMARY_GLAND_DUCT_MORPHOGENESIS	28	0.456538	1.20789	0.220703	0.4086	1	3754	tags=43%, list=24%, signal=57%
GOCC_VESICLE_LUMEN	GOCC_VESICLE_LUMEN	300	0.333073	1.20786	0.209901	0.408429	1	2920	tags=23%, list=19%, signal=28%
GOBP_CERAMIDE_BIOSYNTHETIC_PROCESS	GOBP_CERAMIDE_BIOSYNTHETIC_PROCESS	60	0.368912	1.20784	0.183953	0.408232	1	2625	tags=23%, list=17%, signal=28%
GOCC_MOTILE_CILIUM	GOCC_MOTILE_CILIUM	144	0.451561	1.20763	0.252033	0.408354	1	3643	tags=38%, list=24%, signal=49%
GOBP_SPECIFICATION_OF_SYMMETRY	GOBP_SPECIFICATION_OF_SYMMETRY	110	0.376434	1.20757	0.2	0.408232	1	2254	tags=21%, list=15%, signal=24%
GOBP_ANATOMICAL_STRUCTURE_HOMEOSTASIS	GOBP_ANATOMICAL_STRUCTURE_HOMEOSTASIS	413	0.302913	1.20746	0.137255	0.408192	1	2330	tags=19%, list=15%, signal=22%
GOBP_GLYCEROLIPID_BIOSYNTHETIC_PROCESS	GOBP_GLYCEROLIPID_BIOSYNTHETIC_PROCESS	240	0.293446	1.20732	0.158103	0.40821	1	4362	tags=32%, list=28%, signal=44%
GOBP_GOLGI_TO_PLASMA_MEMBRANE_TRANSPORT	GOBP_GOLGI_TO_PLASMA_MEMBRANE_TRANSPORT	54	0.270911	1.20665	0.231061	0.409101	1	4217	tags=24%, list=27%, signal=33%
GOBP_REGULATION_OF_PROTEIN_SERINE_THREONINE_KINASE_ACTIVITY	GOBP_REGULATION_OF_PROTEIN_SERINE_THREONINE_KINASE_ACTIVITY	444	0.303827	1.20659	0.135189	0.408971	1	3403	tags=27%, list=22%, signal=34%
GOMF_GABA_RECEPTOR_BINDING	GOMF_GABA_RECEPTOR_BINDING	16	0.503466	1.20653	0.258126	0.408848	1	3180	tags=38%, list=21%, signal=47%
GOBP_ORGANOPHOSPHATE_CATABOLIC_PROCESS	GOBP_ORGANOPHOSPHATE_CATABOLIC_PROCESS	140	0.328385	1.20637	0.144814	0.408893	1	4379	tags=43%, list=29%, signal=59%
GOBP_REGULATION_OF_SYNAPSE_ASSEMBLY	GOBP_REGULATION_OF_SYNAPSE_ASSEMBLY	83	0.449161	1.20625	0.223124	0.408911	1	3385	tags=31%, list=22%, signal=40%
GOBP_REGULATION_OF_CELLULAR_PROTEIN_LOCALIZATION	GOBP_REGULATION_OF_CELLULAR_PROTEIN_LOCALIZATION	495	0.240482	1.20609	0.141762	0.408929	1	3375	tags=20%, list=22%, signal=25%
GOMF_INTRACELLULAR_LIGAND_GATED_ION_CHANNEL_ACTIVITY	GOMF_INTRACELLULAR_LIGAND_GATED_ION_CHANNEL_ACTIVITY	28	0.458882	1.20591	0.176238	0.409029	1	1504	tags=29%, list=10%, signal=32%
GOMF_SNAP_RECEPTOR_ACTIVITY	GOMF_SNAP_RECEPTOR_ACTIVITY	36	0.272785	1.20577	0.211881	0.409033	1	6401	tags=50%, list=42%, signal=86%
GOBP_POLY_A_PLUS_MRNA_EXPORT_FROM_NUCLEUS	GOBP_POLY_A_PLUS_MRNA_EXPORT_FROM_NUCLEUS	17	0.429121	1.20551	0.235521	0.409254	1	1201	tags=12%, list=8%, signal=13%
GOBP_BONE_REMODELING	GOBP_BONE_REMODELING	85	0.406867	1.20542	0.177388	0.40919	1	2248	tags=31%, list=15%, signal=36%
GOCC_GLIAL_CELL_PROJECTION	GOCC_GLIAL_CELL_PROJECTION	29	0.488886	1.20528	0.17357	0.409196	1	1958	tags=34%, list=13%, signal=39%
GOBP_ALTERNATIVE_MRNA_SPLICING_VIA_SPLICEOSOME	GOBP_ALTERNATIVE_MRNA_SPLICING_VIA_SPLICEOSOME	69	0.318765	1.20522	0.240506	0.409062	1	2223	tags=12%, list=14%, signal=13%
GOCC_AZUROPHIL_GRANULE_LUMEN	GOCC_AZUROPHIL_GRANULE_LUMEN	79	0.343547	1.20519	0.247525	0.408909	1	4712	tags=38%, list=31%, signal=55%
GOBP_PHOSPHATIDYLSERINE_ACYL_CHAIN_REMODELING	GOBP_PHOSPHATIDYLSERINE_ACYL_CHAIN_REMODELING	19	0.517503	1.20496	0.232692	0.409086	1	3948	tags=53%, list=26%, signal=71%
GOMF_PHOSPHATIDYLINOSITOL_PHOSPHATE_PHOSPHATASE_ACTIVITY	GOMF_PHOSPHATIDYLINOSITOL_PHOSPHATE_PHOSPHATASE_ACTIVITY	29	0.337111	1.20472	0.222445	0.40927	1	4627	tags=55%, list=30%, signal=79%
GOBP_FATTY_ACID_TRANSPORT	GOBP_FATTY_ACID_TRANSPORT	141	0.381955	1.20428	0.136095	0.409793	1	2920	tags=29%, list=19%, signal=36%
GOBP_POSITIVE_REGULATION_OF_RECEPTOR_MEDIATED_ENDOCYTOSIS	GOBP_POSITIVE_REGULATION_OF_RECEPTOR_MEDIATED_ENDOCYTOSIS	48	0.412367	1.2042	0.213018	0.409698	1	4013	tags=42%, list=26%, signal=56%
GOBP_POSITIVE_REGULATION_OF_SIGNAL_TRANSDUCTION_BY_P53_CLASS_MEDIATOR	GOBP_POSITIVE_REGULATION_OF_SIGNAL_TRANSDUCTION_BY_P53_CLASS_MEDIATOR	21	0.411332	1.2041	0.243028	0.409643	1	3203	tags=24%, list=21%, signal=30%
GOBP_REGULATION_OF_CYTOPLASMIC_TRANSLATION	GOBP_REGULATION_OF_CYTOPLASMIC_TRANSLATION	19	0.442161	1.20407	0.25	0.409462	1	3203	tags=26%, list=21%, signal=33%
GOBP_ENSHEATHMENT_OF_NEURONS	GOBP_ENSHEATHMENT_OF_NEURONS	117	0.371982	1.204	0.207171	0.409364	1	2722	tags=28%, list=18%, signal=34%
GOBP_MEGAKARYOCYTE_DIFFERENTIATION	GOBP_MEGAKARYOCYTE_DIFFERENTIATION	58	0.35389	1.20383	0.213592	0.409434	1	2560	tags=22%, list=17%, signal=27%
GOMF_PHOSPHOTRANSFERASE_ACTIVITY_FOR_OTHER_SUBSTITUTED_PHOSPHATE_GROUPS	GOMF_PHOSPHOTRANSFERASE_ACTIVITY_FOR_OTHER_SUBSTITUTED_PHOSPHATE_GROUPS	19	0.353006	1.20355	0.248434	0.409708	1	3314	tags=26%, list=22%, signal=34%
GOBP_REGULATION_OF_MEMBRANE_REPOLARIZATION	GOBP_REGULATION_OF_MEMBRANE_REPOLARIZATION	28	0.511076	1.20352	0.210421	0.409544	1	2601	tags=36%, list=17%, signal=43%
GOBP_POSITIVE_REGULATION_OF_CELLULAR_EXTRAVASATION	GOBP_POSITIVE_REGULATION_OF_CELLULAR_EXTRAVASATION	15	0.505747	1.20341	0.237154	0.409516	1	1454	tags=27%, list=9%, signal=29%
GOBP_LIPID_MODIFICATION	GOBP_LIPID_MODIFICATION	235	0.307963	1.20317	0.17154	0.409689	1	4230	tags=33%, list=28%, signal=45%
GOMF_R_SMAD_BINDING	GOMF_R_SMAD_BINDING	20	0.446835	1.20306	0.259117	0.409633	1	2327	tags=25%, list=15%, signal=29%
GOBP_MONOCARBOXYLIC_ACID_BIOSYNTHETIC_PROCESS	GOBP_MONOCARBOXYLIC_ACID_BIOSYNTHETIC_PROCESS	197	0.358328	1.20298	0.155689	0.409565	1	4239	tags=38%, list=28%, signal=51%
GOBP_REGULATION_OF_LYASE_ACTIVITY	GOBP_REGULATION_OF_LYASE_ACTIVITY	43	0.420807	1.20267	0.181996	0.409885	1	3218	tags=28%, list=21%, signal=35%
GOBP_RESPONSE_TO_OSMOTIC_STRESS	GOBP_RESPONSE_TO_OSMOTIC_STRESS	79	0.333598	1.20243	0.173664	0.410081	1	2861	tags=24%, list=19%, signal=29%
GOMF_OXIDOREDUCTASE_ACTIVITY_ACTING_ON_PEROXIDE_AS_ACCEPTOR	GOMF_OXIDOREDUCTASE_ACTIVITY_ACTING_ON_PEROXIDE_AS_ACCEPTOR	49	0.408798	1.20228	0.182171	0.410133	1	3467	tags=31%, list=23%, signal=39%
GOBP_P_BODY_ASSEMBLY	GOBP_P_BODY_ASSEMBLY	19	0.368802	1.20189	0.258947	0.41061	1	1410	tags=11%, list=9%, signal=12%
GOBP_REGULATION_OF_MEMBRANE_DEPOLARIZATION	GOBP_REGULATION_OF_MEMBRANE_DEPOLARIZATION	40	0.426779	1.20178	0.208502	0.410577	1	1837	tags=25%, list=12%, signal=28%
GOCC_MUSCLE_MYOSIN_COMPLEX	GOCC_MUSCLE_MYOSIN_COMPLEX	15	0.587218	1.2017	0.261297	0.410508	1	4024	tags=53%, list=26%, signal=72%
GOBP_NEGATIVE_REGULATION_OF_MUSCLE_CONTRACTION	GOBP_NEGATIVE_REGULATION_OF_MUSCLE_CONTRACTION	18	0.526264	1.20138	0.222656	0.41084	1	2992	tags=44%, list=19%, signal=55%
GOMF_RETINOID_X_RECEPTOR_BINDING	GOMF_RETINOID_X_RECEPTOR_BINDING	17	0.476936	1.2011	0.257576	0.411135	1	2528	tags=24%, list=16%, signal=28%
GOBP_NEURON_APOPTOTIC_PROCESS	GOBP_NEURON_APOPTOTIC_PROCESS	209	0.328879	1.20089	0.127016	0.411278	1	3416	tags=30%, list=22%, signal=38%
GOBP_REGULATION_OF_TUBE_SIZE	GOBP_REGULATION_OF_TUBE_SIZE	118	0.424887	1.20078	0.158095	0.411242	1	1918	tags=26%, list=12%, signal=30%
GOBP_BONE_CELL_DEVELOPMENT	GOBP_BONE_CELL_DEVELOPMENT	31	0.446235	1.20071	0.259259	0.411117	1	3479	tags=45%, list=23%, signal=58%
GOBP_PROTEIN_CONTAINING_COMPLEX_REMODELING	GOBP_PROTEIN_CONTAINING_COMPLEX_REMODELING	34	0.502775	1.20052	0.193117	0.411246	1	2976	tags=44%, list=19%, signal=55%
GOBP_MYOTUBE_DIFFERENTIATION	GOBP_MYOTUBE_DIFFERENTIATION	92	0.374129	1.20035	0.160321	0.411333	1	3324	tags=32%, list=22%, signal=40%
GOBP_PHOTOPERIODISM	GOBP_PHOTOPERIODISM	31	0.382306	1.19996	0.22158	0.41175	1	4411	tags=42%, list=29%, signal=59%
GOBP_REGULATION_OF_B_CELL_DIFFERENTIATION	GOBP_REGULATION_OF_B_CELL_DIFFERENTIATION	29	0.514136	1.19995	0.283951	0.411545	1	2560	tags=48%, list=17%, signal=58%
GOMF_PEPTIDE_ANTIGEN_BINDING	GOMF_PEPTIDE_ANTIGEN_BINDING	20	0.50483	1.1995	0.251509	0.412079	1	4251	tags=60%, list=28%, signal=83%
GOBP_ARACHIDONIC_ACID_SECRETION	GOBP_ARACHIDONIC_ACID_SECRETION	27	0.480664	1.19939	0.200787	0.412035	1	2842	tags=37%, list=19%, signal=45%
GOBP_LACTATION	GOBP_LACTATION	42	0.36527	1.19848	0.186275	0.413377	1	3182	tags=24%, list=21%, signal=30%
GOBP_HOMEOSTASIS_OF_NUMBER_OF_CELLS_WITHIN_A_TISSUE	GOBP_HOMEOSTASIS_OF_NUMBER_OF_CELLS_WITHIN_A_TISSUE	26	0.430863	1.19802	0.226744	0.413959	1	2455	tags=31%, list=16%, signal=37%
GOBP_POSITIVE_REGULATION_OF_CILIUM_ASSEMBLY	GOBP_POSITIVE_REGULATION_OF_CILIUM_ASSEMBLY	20	0.469662	1.19781	0.281746	0.414097	1	4192	tags=40%, list=27%, signal=55%
GOBP_ACTION_POTENTIAL	GOBP_ACTION_POTENTIAL	123	0.415739	1.19739	0.189922	0.41455	1	2010	tags=26%, list=13%, signal=30%
GOMF_CATION_CATION_ANTIPORTER_ACTIVITY	GOMF_CATION_CATION_ANTIPORTER_ACTIVITY	21	0.469429	1.19739	0.228346	0.414329	1	3492	tags=43%, list=23%, signal=55%
GOMF_GATED_CHANNEL_ACTIVITY	GOMF_GATED_CHANNEL_ACTIVITY	311	0.390999	1.19672	0.136735	0.415291	1	2765	tags=27%, list=18%, signal=32%
GOCC_BASEMENT_MEMBRANE	GOCC_BASEMENT_MEMBRANE	87	0.431203	1.19634	0.21673	0.415736	1	2274	tags=26%, list=15%, signal=31%
GOBP_APOPTOTIC_PROCESS_INVOLVED_IN_DEVELOPMENT	GOBP_APOPTOTIC_PROCESS_INVOLVED_IN_DEVELOPMENT	31	0.457037	1.19626	0.215292	0.41565	1	2362	tags=29%, list=15%, signal=34%
GOBP_POSITIVE_REGULATION_OF_T_CELL_MIGRATION	GOBP_POSITIVE_REGULATION_OF_T_CELL_MIGRATION	27	0.480151	1.19608	0.278656	0.415724	1	3234	tags=41%, list=21%, signal=52%
GOBP_NEGATIVE_REGULATION_OF_OSTEOBLAST_DIFFERENTIATION	GOBP_NEGATIVE_REGULATION_OF_OSTEOBLAST_DIFFERENTIATION	42	0.471604	1.19605	0.2147	0.41556	1	2132	tags=31%, list=14%, signal=36%
GOMF_NUCLEAR_RECEPTOR_BINDING	GOMF_NUCLEAR_RECEPTOR_BINDING	93	0.336085	1.19578	0.220039	0.415787	1	494	tags=6%, list=3%, signal=7%
GOBP_CELLULAR_RESPONSE_TO_CADMIUM_ION	GOBP_CELLULAR_RESPONSE_TO_CADMIUM_ION	34	0.413732	1.19536	0.270541	0.416306	1	2833	tags=32%, list=18%, signal=40%
GOBP_POSITIVE_REGULATION_OF_OSTEOCLAST_DIFFERENTIATION	GOBP_POSITIVE_REGULATION_OF_OSTEOCLAST_DIFFERENTIATION	26	0.48425	1.19532	0.233918	0.416136	1	3479	tags=50%, list=23%, signal=65%
GOBP_REGULATION_OF_APOPTOTIC_SIGNALING_PATHWAY	GOBP_REGULATION_OF_APOPTOTIC_SIGNALING_PATHWAY	306	0.285633	1.19532	0.174329	0.415913	1	2609	tags=16%, list=17%, signal=19%
GOBP_NEGATIVE_REGULATION_OF_AMINE_TRANSPORT	GOBP_NEGATIVE_REGULATION_OF_AMINE_TRANSPORT	25	0.548639	1.19461	0.219925	0.416957	1	1673	tags=32%, list=11%, signal=36%
GOBP_SPHINGOLIPID_METABOLIC_PROCESS	GOBP_SPHINGOLIPID_METABOLIC_PROCESS	145	0.308094	1.19434	0.152805	0.417237	1	2625	tags=17%, list=17%, signal=21%
GOBP_MAINTENANCE_OF_PROTEIN_LOCATION_IN_CELL	GOBP_MAINTENANCE_OF_PROTEIN_LOCATION_IN_CELL	63	0.296468	1.1941	0.210728	0.417457	1	5134	tags=40%, list=33%, signal=59%
GOBP_REGULATION_OF_MITOCHONDRIAL_MEMBRANE_POTENTIAL	GOBP_REGULATION_OF_MITOCHONDRIAL_MEMBRANE_POTENTIAL	62	0.317731	1.194	0.191983	0.417399	1	1958	tags=15%, list=13%, signal=17%
GOBP_ODONTOGENESIS_OF_DENTIN_CONTAINING_TOOTH	GOBP_ODONTOGENESIS_OF_DENTIN_CONTAINING_TOOTH	80	0.421638	1.19371	0.176238	0.417677	1	2020	tags=23%, list=13%, signal=26%
GOBP_RESPONSE_TO_CATECHOLAMINE	GOBP_RESPONSE_TO_CATECHOLAMINE	90	0.364822	1.1933	0.178715	0.418149	1	3701	tags=31%, list=24%, signal=41%
GOBP_REGULATION_OF_OSTEOBLAST_DIFFERENTIATION	GOBP_REGULATION_OF_OSTEOBLAST_DIFFERENTIATION	106	0.416094	1.19329	0.203065	0.417946	1	3204	tags=34%, list=21%, signal=43%
GOBP_REGULATION_OF_TRANSMEMBRANE_RECEPTOR_PROTEIN_SERINE_THREONINE_KINASE_SIGNALING_PATHWAY	GOBP_REGULATION_OF_TRANSMEMBRANE_RECEPTOR_PROTEIN_SERINE_THREONINE_KINASE_SIGNALING_PATHWAY	222	0.358025	1.19309	0.172481	0.418042	1	2790	tags=23%, list=18%, signal=28%
GOBP_REGULATION_OF_SYNAPTIC_VESICLE_EXOCYTOSIS	GOBP_REGULATION_OF_SYNAPTIC_VESICLE_EXOCYTOSIS	51	0.435682	1.19301	0.195219	0.417954	1	1724	tags=22%, list=11%, signal=24%
GOBP_PHOSPHOLIPID_BIOSYNTHETIC_PROCESS	GOBP_PHOSPHOLIPID_BIOSYNTHETIC_PROCESS	247	0.277023	1.19298	0.179487	0.417763	1	4362	tags=29%, list=28%, signal=40%
GOBP_SUBSTRATE_DEPENDENT_CELL_MIGRATION	GOBP_SUBSTRATE_DEPENDENT_CELL_MIGRATION	22	0.429144	1.19287	0.235644	0.417764	1	3586	tags=36%, list=23%, signal=47%
GOBP_NUCLEOSIDE_METABOLIC_PROCESS	GOBP_NUCLEOSIDE_METABOLIC_PROCESS	91	0.309604	1.19265	0.187984	0.417905	1	3593	tags=29%, list=23%, signal=37%
GOBP_STEROID_HORMONE_SECRETION	GOBP_STEROID_HORMONE_SECRETION	19	0.523189	1.19219	0.21501	0.418476	1	1321	tags=32%, list=9%, signal=35%
GOMF_DNA_BINDING_TRANSCRIPTION_REPRESSOR_ACTIVITY	GOMF_DNA_BINDING_TRANSCRIPTION_REPRESSOR_ACTIVITY	281	0.316559	1.19208	0.145877	0.418464	1	3293	tags=25%, list=21%, signal=31%
GOBP_NEPHRON_DEVELOPMENT	GOBP_NEPHRON_DEVELOPMENT	134	0.387912	1.19202	0.173664	0.418353	1	2020	tags=22%, list=13%, signal=26%
GOBP_REGULATION_OF_RYANODINE_SENSITIVE_CALCIUM_RELEASE_CHANNEL_ACTIVITY	GOBP_REGULATION_OF_RYANODINE_SENSITIVE_CALCIUM_RELEASE_CHANNEL_ACTIVITY	22	0.523438	1.19197	0.255952	0.418221	1	4147	tags=55%, list=27%, signal=75%
GOMF_DNA_BINDING_TRANSCRIPTION_FACTOR_BINDING	GOMF_DNA_BINDING_TRANSCRIPTION_FACTOR_BINDING	357	0.253833	1.19163	0.212406	0.418589	1	2717	tags=15%, list=18%, signal=18%
GOBP_CELLULAR_RESPONSE_TO_THYROID_HORMONE_STIMULUS	GOBP_CELLULAR_RESPONSE_TO_THYROID_HORMONE_STIMULUS	15	0.468377	1.19145	0.2643	0.418659	1	2893	tags=40%, list=19%, signal=49%
GOBP_RESPONSE_TO_ANTIBIOTIC	GOBP_RESPONSE_TO_ANTIBIOTIC	42	0.347435	1.19101	0.22332	0.419216	1	3174	tags=29%, list=21%, signal=36%
GOBP_ASYMMETRIC_CELL_DIVISION	GOBP_ASYMMETRIC_CELL_DIVISION	16	0.466725	1.19052	0.269618	0.41983	1	3036	tags=31%, list=20%, signal=39%
GOBP_FEMALE_GENITALIA_DEVELOPMENT	GOBP_FEMALE_GENITALIA_DEVELOPMENT	15	0.494186	1.19046	0.227926	0.419727	1	2998	tags=47%, list=20%, signal=58%
GOMF_NEUROTRANSMITTER_TRANSMEMBRANE_TRANSPORTER_ACTIVITY	GOMF_NEUROTRANSMITTER_TRANSMEMBRANE_TRANSPORTER_ACTIVITY	19	0.52663	1.18992	0.215164	0.420442	1	775	tags=21%, list=5%, signal=22%
GOBP_POTASSIUM_ION_TRANSPORT	GOBP_POTASSIUM_ION_TRANSPORT	212	0.3834	1.18954	0.150301	0.4209	1	3546	tags=34%, list=23%, signal=44%
GOMF_STRUCTURAL_CONSTITUENT_OF_MUSCLE	GOMF_STRUCTURAL_CONSTITUENT_OF_MUSCLE	42	0.466064	1.18934	0.243852	0.42099	1	2437	tags=29%, list=16%, signal=34%
GOBP_LYMPHOCYTE_CHEMOTAXIS	GOBP_LYMPHOCYTE_CHEMOTAXIS	45	0.526123	1.18911	0.247984	0.421176	1	1548	tags=31%, list=10%, signal=34%
GOBP_POSITIVE_REGULATION_OF_RESPONSE_TO_BIOTIC_STIMULUS	GOBP_POSITIVE_REGULATION_OF_RESPONSE_TO_BIOTIC_STIMULUS	229	0.359395	1.1888	0.255906	0.421492	1	3093	tags=26%, list=20%, signal=32%
GOBP_CELLULAR_RESPONSE_TO_EXTRACELLULAR_STIMULUS	GOBP_CELLULAR_RESPONSE_TO_EXTRACELLULAR_STIMULUS	209	0.296385	1.18878	0.179537	0.421299	1	3074	tags=20%, list=20%, signal=25%
GOBP_REGULATION_OF_OLIGODENDROCYTE_DIFFERENTIATION	GOBP_REGULATION_OF_OLIGODENDROCYTE_DIFFERENTIATION	36	0.414059	1.18871	0.212891	0.421194	1	3629	tags=28%, list=24%, signal=36%
GOBP_REGULATORY_T_CELL_DIFFERENTIATION	GOBP_REGULATORY_T_CELL_DIFFERENTIATION	30	0.519381	1.18865	0.320641	0.421086	1	3653	tags=50%, list=24%, signal=65%
GOBP_POSITIVE_REGULATION_OF_CELL_SUBSTRATE_JUNCTION_ORGANIZATION	GOBP_POSITIVE_REGULATION_OF_CELL_SUBSTRATE_JUNCTION_ORGANIZATION	30	0.411655	1.1886	0.236473	0.420965	1	4079	tags=37%, list=27%, signal=50%
GOBP_PROTEIN_LIPID_COMPLEX_SUBUNIT_ORGANIZATION	GOBP_PROTEIN_LIPID_COMPLEX_SUBUNIT_ORGANIZATION	53	0.443026	1.18796	0.188235	0.421882	1	2976	tags=38%, list=19%, signal=47%
GOMF_G_PROTEIN_COUPLED_RECEPTOR_BINDING	GOMF_G_PROTEIN_COUPLED_RECEPTOR_BINDING	244	0.377711	1.18794	0.145315	0.421705	1	3515	tags=32%, list=23%, signal=40%
GOBP_NEGATIVE_REGULATION_OF_NEURON_APOPTOTIC_PROCESS	GOBP_NEGATIVE_REGULATION_OF_NEURON_APOPTOTIC_PROCESS	123	0.355955	1.18787	0.15087	0.421605	1	3404	tags=32%, list=22%, signal=40%
GOBP_BRANCHING_INVOLVED_IN_SALIVARY_GLAND_MORPHOGENESIS	GOBP_BRANCHING_INVOLVED_IN_SALIVARY_GLAND_MORPHOGENESIS	19	0.484319	1.18709	0.252	0.422762	1	2352	tags=26%, list=15%, signal=31%
GOBP_GLUCOSAMINE_CONTAINING_COMPOUND_METABOLIC_PROCESS	GOBP_GLUCOSAMINE_CONTAINING_COMPOUND_METABOLIC_PROCESS	23	0.452592	1.18677	0.20396	0.423073	1	2501	tags=26%, list=16%, signal=31%
GOBP_RELAXATION_OF_CARDIAC_MUSCLE	GOBP_RELAXATION_OF_CARDIAC_MUSCLE	17	0.511792	1.18627	0.270059	0.423759	1	4544	tags=59%, list=30%, signal=83%
GOCC_PORE_COMPLEX	GOCC_PORE_COMPLEX	22	0.491466	1.1861	0.245509	0.423831	1	1926	tags=32%, list=13%, signal=36%
GOBP_PROTEIN_LOCALIZATION_TO_GOLGI_APPARATUS	GOBP_PROTEIN_LOCALIZATION_TO_GOLGI_APPARATUS	28	0.342441	1.18594	0.224138	0.423928	1	5354	tags=43%, list=35%, signal=66%
GOBP_REGULATION_OF_SODIUM_ION_TRANSMEMBRANE_TRANSPORT	GOBP_REGULATION_OF_SODIUM_ION_TRANSMEMBRANE_TRANSPORT	61	0.418074	1.18585	0.22	0.423865	1	2007	tags=26%, list=13%, signal=30%
GOBP_REGULATION_OF_MEMBRANE_POTENTIAL	GOBP_REGULATION_OF_MEMBRANE_POTENTIAL	396	0.364146	1.18574	0.178641	0.423842	1	2010	tags=20%, list=13%, signal=22%
GOMF_UBIQUITIN_LIKE_PROTEIN_LIGASE_ACTIVITY	GOMF_UBIQUITIN_LIKE_PROTEIN_LIGASE_ACTIVITY	268	0.237449	1.18562	0.143141	0.423808	1	5287	tags=36%, list=34%, signal=54%
GOBP_REPLACEMENT_OSSIFICATION	GOBP_REPLACEMENT_OSSIFICATION	26	0.473756	1.18561	0.258621	0.423592	1	2187	tags=27%, list=14%, signal=31%
GOBP_REGULATION_OF_CYCLASE_ACTIVITY	GOBP_REGULATION_OF_CYCLASE_ACTIVITY	42	0.426346	1.18558	0.19084	0.423444	1	2601	tags=24%, list=17%, signal=29%
GOBP_POSITIVE_REGULATION_OF_LAMELLIPODIUM_ORGANIZATION	GOBP_POSITIVE_REGULATION_OF_LAMELLIPODIUM_ORGANIZATION	34	0.347787	1.18518	0.222437	0.42394	1	3472	tags=29%, list=23%, signal=38%
GOBP_REGULATION_OF_BONE_MINERALIZATION	GOBP_REGULATION_OF_BONE_MINERALIZATION	66	0.431657	1.18506	0.198058	0.423902	1	2790	tags=35%, list=18%, signal=42%
GOBP_MUSCLE_CELL_DEVELOPMENT	GOBP_MUSCLE_CELL_DEVELOPMENT	147	0.382453	1.18384	0.209486	0.425752	1	2862	tags=27%, list=19%, signal=33%
GOCC_NUCLEAR_MEMBRANE	GOCC_NUCLEAR_MEMBRANE	259	0.225009	1.18355	0.180451	0.426043	1	2898	tags=15%, list=19%, signal=19%
GOBP_POSITIVE_REGULATION_OF_LIPID_BIOSYNTHETIC_PROCESS	GOBP_POSITIVE_REGULATION_OF_LIPID_BIOSYNTHETIC_PROCESS	74	0.370674	1.183	0.203095	0.426776	1	2833	tags=28%, list=18%, signal=35%
GOBP_PULMONARY_VALVE_MORPHOGENESIS	GOBP_PULMONARY_VALVE_MORPHOGENESIS	17	0.528017	1.1829	0.282306	0.426724	1	5037	tags=76%, list=33%, signal=114%
GOBP_POSITIVE_REGULATION_OF_ORGANELLE_ASSEMBLY	GOBP_POSITIVE_REGULATION_OF_ORGANELLE_ASSEMBLY	59	0.314455	1.1829	0.261044	0.426508	1	3661	tags=24%, list=24%, signal=31%
GOBP_POSITIVE_REGULATION_OF_ACTIN_CYTOSKELETON_REORGANIZATION	GOBP_POSITIVE_REGULATION_OF_ACTIN_CYTOSKELETON_REORGANIZATION	19	0.495196	1.18254	0.289883	0.4269	1	1912	tags=26%, list=12%, signal=30%
GOMF_PROTEIN_KINASE_C_BINDING	GOMF_PROTEIN_KINASE_C_BINDING	48	0.343692	1.18226	0.219067	0.427178	1	3097	tags=27%, list=20%, signal=34%
GOBP_MULTICELLULAR_ORGANISMAL_SIGNALING	GOBP_MULTICELLULAR_ORGANISMAL_SIGNALING	190	0.401212	1.18223	0.207843	0.426995	1	2067	tags=23%, list=13%, signal=26%
GOMF_STEROL_BINDING	GOMF_STEROL_BINDING	59	0.343021	1.18217	0.191489	0.426885	1	5027	tags=49%, list=33%, signal=73%
GOBP_REGULATION_OF_ANOIKIS	GOBP_REGULATION_OF_ANOIKIS	22	0.41469	1.18212	0.253968	0.426741	1	1675	tags=18%, list=11%, signal=20%
GOBP_POSITIVE_REGULATION_OF_PROTEIN_TYROSINE_KINASE_ACTIVITY	GOBP_POSITIVE_REGULATION_OF_PROTEIN_TYROSINE_KINASE_ACTIVITY	51	0.420495	1.18201	0.195519	0.426707	1	3338	tags=41%, list=22%, signal=52%
GOBP_DEFENSE_RESPONSE_TO_GRAM_NEGATIVE_BACTERIUM	GOBP_DEFENSE_RESPONSE_TO_GRAM_NEGATIVE_BACTERIUM	64	0.444456	1.18201	0.193159	0.426485	1	2630	tags=33%, list=17%, signal=39%
GOMF_TRANSCRIPTION_COREGULATOR_ACTIVITY	GOMF_TRANSCRIPTION_COREGULATOR_ACTIVITY	440	0.19517	1.18172	0.231855	0.426796	1	2646	tags=11%, list=17%, signal=13%
GOBP_ANIMAL_ORGAN_FORMATION	GOBP_ANIMAL_ORGAN_FORMATION	59	0.432832	1.18165	0.208251	0.426689	1	2864	tags=34%, list=19%, signal=42%
GOMF_PROTEIN_HETERODIMERIZATION_ACTIVITY	GOMF_PROTEIN_HETERODIMERIZATION_ACTIVITY	221	0.28317	1.18147	0.175542	0.426799	1	2018	tags=13%, list=13%, signal=15%
GOBP_SKELETAL_MUSCLE_ORGAN_DEVELOPMENT	GOBP_SKELETAL_MUSCLE_ORGAN_DEVELOPMENT	138	0.375404	1.18138	0.208	0.426725	1	3255	tags=33%, list=21%, signal=41%
GOBP_PLASMA_MEMBRANE_PHOSPHOLIPID_SCRAMBLING	GOBP_PLASMA_MEMBRANE_PHOSPHOLIPID_SCRAMBLING	16	0.482527	1.18091	0.210938	0.427318	1	2180	tags=38%, list=14%, signal=44%
GOBP_LIPID_HOMEOSTASIS	GOBP_LIPID_HOMEOSTASIS	129	0.363617	1.18048	0.200758	0.427822	1	2256	tags=24%, list=15%, signal=28%
GOBP_NEGATIVE_REGULATION_OF_PLASMA_MEMBRANE_BOUNDED_CELL_PROJECTION_ASSEMBLY	GOBP_NEGATIVE_REGULATION_OF_PLASMA_MEMBRANE_BOUNDED_CELL_PROJECTION_ASSEMBLY	28	0.397633	1.18021	0.2173	0.428039	1	3472	tags=43%, list=23%, signal=55%
GOBP_REGULATION_OF_SKELETAL_MUSCLE_CELL_DIFFERENTIATION	GOBP_REGULATION_OF_SKELETAL_MUSCLE_CELL_DIFFERENTIATION	16	0.526078	1.18009	0.261702	0.428013	1	1457	tags=25%, list=9%, signal=28%
GOBP_ACTIN_MEDIATED_CELL_CONTRACTION	GOBP_ACTIN_MEDIATED_CELL_CONTRACTION	113	0.420791	1.17927	0.205534	0.429163	1	3192	tags=36%, list=21%, signal=45%
GOBP_REGULATION_OF_NECROTIC_CELL_DEATH	GOBP_REGULATION_OF_NECROTIC_CELL_DEATH	29	0.33054	1.17901	0.237548	0.429404	1	3231	tags=28%, list=21%, signal=35%
GOBP_MUSCLE_ORGAN_DEVELOPMENT	GOBP_MUSCLE_ORGAN_DEVELOPMENT	281	0.361844	1.17887	0.203488	0.429424	1	3261	tags=31%, list=21%, signal=39%
GOBP_DEFENSE_RESPONSE_TO_BACTERIUM	GOBP_DEFENSE_RESPONSE_TO_BACTERIUM	212	0.403854	1.17868	0.189516	0.429568	1	2989	tags=33%, list=19%, signal=41%
GOBP_REGULATION_OF_SMOOTH_MUSCLE_CONTRACTION	GOBP_REGULATION_OF_SMOOTH_MUSCLE_CONTRACTION	51	0.454881	1.17864	0.239766	0.429413	1	2029	tags=29%, list=13%, signal=34%
GOBP_REGULATION_OF_CELL_SIZE	GOBP_REGULATION_OF_CELL_SIZE	162	0.330381	1.17783	0.192308	0.430618	1	3552	tags=28%, list=23%, signal=36%
GOBP_NEPHRON_TUBULE_FORMATION	GOBP_NEPHRON_TUBULE_FORMATION	17	0.516549	1.17778	0.215031	0.430497	1	1159	tags=24%, list=8%, signal=25%
GOBP_SUBSTRATE_ADHESION_DEPENDENT_CELL_SPREADING	GOBP_SUBSTRATE_ADHESION_DEPENDENT_CELL_SPREADING	103	0.346168	1.17736	0.221172	0.431001	1	3655	tags=32%, list=24%, signal=42%
GOBP_VACUOLAR_ACIDIFICATION	GOBP_VACUOLAR_ACIDIFICATION	23	0.395689	1.17722	0.294492	0.431049	1	5945	tags=70%, list=39%, signal=113%
GOBP_MODULATION_BY_SYMBIONT_OF_ENTRY_INTO_HOST	GOBP_MODULATION_BY_SYMBIONT_OF_ENTRY_INTO_HOST	43	0.399803	1.17703	0.241245	0.431165	1	2799	tags=30%, list=18%, signal=37%
GOCC_FICOLIN_1_RICH_GRANULE_MEMBRANE	GOCC_FICOLIN_1_RICH_GRANULE_MEMBRANE	57	0.412572	1.17686	0.296875	0.431229	1	4457	tags=44%, list=29%, signal=62%
GOBP_POSITIVE_REGULATION_OF_PEPTIDE_SECRETION	GOBP_POSITIVE_REGULATION_OF_PEPTIDE_SECRETION	138	0.336895	1.17665	0.183044	0.431348	1	2890	tags=24%, list=19%, signal=29%
GOBP_REGULATION_OF_LAMELLIPODIUM_ORGANIZATION	GOBP_REGULATION_OF_LAMELLIPODIUM_ORGANIZATION	46	0.339698	1.17642	0.214971	0.431518	1	3472	tags=30%, list=23%, signal=39%
GOBP_POSITIVE_REGULATION_OF_LIPID_LOCALIZATION	GOBP_POSITIVE_REGULATION_OF_LIPID_LOCALIZATION	103	0.370536	1.17636	0.178499	0.431394	1	3198	tags=32%, list=21%, signal=40%
GOBP_TOLL_LIKE_RECEPTOR_2_SIGNALING_PATHWAY	GOBP_TOLL_LIKE_RECEPTOR_2_SIGNALING_PATHWAY	16	0.49041	1.17614	0.307229	0.431607	1	4332	tags=44%, list=28%, signal=61%
GOBP_UROGENITAL_SYSTEM_DEVELOPMENT	GOBP_UROGENITAL_SYSTEM_DEVELOPMENT	310	0.365474	1.17599	0.192079	0.431663	1	2566	tags=25%, list=17%, signal=29%
GOBP_ZYMOGEN_ACTIVATION	GOBP_ZYMOGEN_ACTIVATION	48	0.426521	1.17591	0.206	0.43158	1	828	tags=17%, list=5%, signal=18%
GOBP_REGULATION_OF_RESPONSE_TO_ENDOPLASMIC_RETICULUM_STRESS	GOBP_REGULATION_OF_RESPONSE_TO_ENDOPLASMIC_RETICULUM_STRESS	74	0.263056	1.17583	0.253788	0.431515	1	4884	tags=28%, list=32%, signal=41%
GOMF_PASSIVE_TRANSMEMBRANE_TRANSPORTER_ACTIVITY	GOMF_PASSIVE_TRANSMEMBRANE_TRANSPORTER_ACTIVITY	419	0.365056	1.17583	0.136179	0.431297	1	3025	tags=26%, list=20%, signal=32%
GOBP_NEGATIVE_REGULATION_OF_ERK1_AND_ERK2_CASCADE	GOBP_NEGATIVE_REGULATION_OF_ERK1_AND_ERK2_CASCADE	67	0.345957	1.17553	0.226488	0.431597	1	3506	tags=34%, list=23%, signal=44%
GOBP_SODIUM_ION_TRANSPORT	GOBP_SODIUM_ION_TRANSPORT	218	0.377232	1.17546	0.162551	0.431538	1	3645	tags=33%, list=24%, signal=43%
GOBP_CELL_CELL_SIGNALING_BY_WNT	GOBP_CELL_CELL_SIGNALING_BY_WNT	466	0.285449	1.1753	0.188931	0.431587	1	3130	tags=21%, list=20%, signal=26%
GOBP_REGENERATION	GOBP_REGENERATION	169	0.333862	1.1752	0.180077	0.431532	1	2895	tags=27%, list=19%, signal=32%
GOBP_CARDIAC_CONDUCTION	GOBP_CARDIAC_CONDUCTION	138	0.396142	1.17506	0.219048	0.431568	1	2192	tags=23%, list=14%, signal=27%
GOMF_PHOSPHOLIPID_BINDING	GOMF_PHOSPHOLIPID_BINDING	406	0.289853	1.17505	0.1673	0.431361	1	4043	tags=30%, list=26%, signal=40%
GOCC_SYNAPTIC_CLEFT	GOCC_SYNAPTIC_CLEFT	16	0.554844	1.17475	0.258873	0.431653	1	1370	tags=25%, list=9%, signal=27%
GOCC_DISTAL_AXON	GOCC_DISTAL_AXON	267	0.344775	1.17435	0.205179	0.432156	1	3625	tags=31%, list=24%, signal=40%
GOBP_MORPHOGENESIS_OF_AN_EPITHELIAL_BUD	GOBP_MORPHOGENESIS_OF_AN_EPITHELIAL_BUD	15	0.560839	1.17418	0.2607	0.432223	1	3875	tags=60%, list=25%, signal=80%
GOBP_REGULATION_OF_SODIUM_ION_TRANSPORT	GOBP_REGULATION_OF_SODIUM_ION_TRANSPORT	82	0.388199	1.1738	0.204453	0.432663	1	2007	tags=23%, list=13%, signal=27%
GOBP_NEGATIVE_REGULATION_OF_RESPONSE_TO_OXIDATIVE_STRESS	GOBP_NEGATIVE_REGULATION_OF_RESPONSE_TO_OXIDATIVE_STRESS	18	0.4604	1.1734	0.225243	0.433164	1	2014	tags=33%, list=13%, signal=38%
GOBP_PLATELET_AGGREGATION	GOBP_PLATELET_AGGREGATION	58	0.412195	1.1732	0.260784	0.433318	1	2992	tags=34%, list=19%, signal=43%
GOBP_PHENOL_CONTAINING_COMPOUND_METABOLIC_PROCESS	GOBP_PHENOL_CONTAINING_COMPOUND_METABOLIC_PROCESS	95	0.409343	1.173	0.199203	0.433438	1	2900	tags=33%, list=19%, signal=40%
GOBP_RESPONSE_TO_PEPTIDE_HORMONE	GOBP_RESPONSE_TO_PEPTIDE_HORMONE	397	0.291572	1.17222	0.149606	0.434587	1	3219	tags=24%, list=21%, signal=30%
GOCC_PERINUCLEAR_ENDOPLASMIC_RETICULUM	GOCC_PERINUCLEAR_ENDOPLASMIC_RETICULUM	20	0.419682	1.1721	0.234375	0.434559	1	1884	tags=25%, list=12%, signal=28%
GOCC_COSTAMERE	GOCC_COSTAMERE	18	0.487622	1.17194	0.279167	0.434618	1	2286	tags=33%, list=15%, signal=39%
GOBP_SYNAPTIC_TRANSMISSION_DOPAMINERGIC	GOBP_SYNAPTIC_TRANSMISSION_DOPAMINERGIC	23	0.465391	1.1716	0.229703	0.43496	1	1256	tags=22%, list=8%, signal=24%
GOMF_NADP_BINDING	GOMF_NADP_BINDING	50	0.388535	1.17144	0.23431	0.435012	1	1017	tags=16%, list=7%, signal=17%
GOMF_PHOSPHATIDYLINOSITOL_MONOPHOSPHATE_PHOSPHATASE_ACTIVITY	GOMF_PHOSPHATIDYLINOSITOL_MONOPHOSPHATE_PHOSPHATASE_ACTIVITY	17	0.385805	1.17106	0.262834	0.435478	1	4627	tags=65%, list=30%, signal=93%
GOMF_ENZYME_INHIBITOR_ACTIVITY	GOMF_ENZYME_INHIBITOR_ACTIVITY	332	0.331996	1.17098	0.165323	0.435411	1	3449	tags=30%, list=22%, signal=38%
GOMF_OXIDOREDUCTASE_ACTIVITY_ACTING_ON_THE_CH_NH2_GROUP_OF_DONORS_OXYGEN_AS_ACCEPTOR	GOMF_OXIDOREDUCTASE_ACTIVITY_ACTING_ON_THE_CH_NH2_GROUP_OF_DONORS_OXYGEN_AS_ACCEPTOR	15	0.525542	1.17095	0.27789	0.43525	1	2834	tags=40%, list=18%, signal=49%
GOBP_PROTEIN_HOMOTETRAMERIZATION	GOBP_PROTEIN_HOMOTETRAMERIZATION	55	0.362452	1.17084	0.22736	0.435213	1	2499	tags=22%, list=16%, signal=26%
GOMF_TRIGLYCERIDE_LIPASE_ACTIVITY	GOMF_TRIGLYCERIDE_LIPASE_ACTIVITY	27	0.460716	1.17065	0.215842	0.43535	1	4854	tags=52%, list=32%, signal=76%
GOBP_DENDRITE_MORPHOGENESIS	GOBP_DENDRITE_MORPHOGENESIS	132	0.346198	1.17063	0.196881	0.435165	1	3515	tags=27%, list=23%, signal=34%
GOBP_CELLULAR_RESPONSE_TO_CARBOHYDRATE_STIMULUS	GOBP_CELLULAR_RESPONSE_TO_CARBOHYDRATE_STIMULUS	122	0.333033	1.17003	0.187381	0.436045	1	1445	tags=15%, list=9%, signal=16%
GOBP_MONOAMINE_TRANSPORT	GOBP_MONOAMINE_TRANSPORT	72	0.441558	1.17002	0.173554	0.435833	1	2314	tags=28%, list=15%, signal=33%
GOBP_STEROID_CATABOLIC_PROCESS	GOBP_STEROID_CATABOLIC_PROCESS	26	0.448699	1.1697	0.220648	0.436142	1	3476	tags=46%, list=23%, signal=60%
GOBP_IMPORT_INTO_CELL	GOBP_IMPORT_INTO_CELL	220	0.338652	1.16952	0.16047	0.436223	1	2381	tags=21%, list=16%, signal=24%
[truncated: 3,026 more rows]

## Sheet: gsea_report_for_high-risk group
NAME	GS<br> follow link to MSigDB	SIZE	ES	NES	NOM p-val	FDR q-val	FWER p-val	RANK AT MAX	LEADING EDGE	Column1
HALLMARK_MYC_TARGETS_V1	HALLMARK_MYC_TARGETS_V1	187	-0.582487	-2.18215	0.0020202	0.00347923	0.005	3911	tags=51%, list=25%, signal=68%
HALLMARK_UNFOLDED_PROTEIN_RESPONSE	HALLMARK_UNFOLDED_PROTEIN_RESPONSE	105	-0.455801	-1.92199	0.0102669	0.0201068	0.047	3704	tags=43%, list=24%, signal=56%
HALLMARK_MYC_TARGETS_V2	HALLMARK_MYC_TARGETS_V2	58	-0.616241	-1.81213	0.0181087	0.0318791	0.093	4212	tags=76%, list=27%, signal=104%
HALLMARK_G2M_CHECKPOINT	HALLMARK_G2M_CHECKPOINT	187	-0.70428	-1.68586	0.0158103	0.0598701	0.215	1452	tags=40%, list=9%, signal=43%
HALLMARK_E2F_TARGETS	HALLMARK_E2F_TARGETS	192	-0.703524	-1.66301	0.0158103	0.0569846	0.26	1649	tags=41%, list=11%, signal=46%
HALLMARK_MTORC1_SIGNALING	HALLMARK_MTORC1_SIGNALING	192	-0.442761	-1.63946	0.0472846	0.0561241	0.3	3501	tags=45%, list=23%, signal=57%
HALLMARK_DNA_REPAIR	HALLMARK_DNA_REPAIR	133	-0.336095	-1.62463	0.0587045	0.0532572	0.327	3919	tags=44%, list=26%, signal=58%
HALLMARK_GLYCOLYSIS	HALLMARK_GLYCOLYSIS	196	-0.443872	-1.59645	0.0138067	0.0578694	0.377	2833	tags=38%, list=18%, signal=46%
HALLMARK_MITOTIC_SPINDLE	HALLMARK_MITOTIC_SPINDLE	194	-0.415839	-1.44545	0.121514	0.13144	0.633	975	tags=14%, list=6%, signal=15%
HALLMARK_OXIDATIVE_PHOSPHORYLATION	HALLMARK_OXIDATIVE_PHOSPHORYLATION	181	-0.250346	-1.15995	0.326271	0.401834	0.937	5162	tags=45%, list=34%, signal=67%
HALLMARK_HYPOXIA	HALLMARK_HYPOXIA	190	-0.299912	-1.05046	0.379098	0.531322	0.975	1492	tags=16%, list=10%, signal=18%
HALLMARK_SPERMATOGENESIS	HALLMARK_SPERMATOGENESIS	132	-0.356199	-1.01845	0.40121	0.533983	0.981	2886	tags=36%, list=19%, signal=43%
HALLMARK_ESTROGEN_RESPONSE_LATE	HALLMARK_ESTROGEN_RESPONSE_LATE	191	-0.288144	-0.973907	0.491018	0.55986	0.984	1795	tags=24%, list=12%, signal=26%
HALLMARK_REACTIVE_OXYGEN_SPECIES_PATHWAY	HALLMARK_REACTIVE_OXYGEN_SPECIES_PATHWAY	44	-0.23541	-0.813483	0.656	0.78186	0.997	1054	tags=14%, list=7%, signal=15%
HALLMARK_PANCREAS_BETA_CELLS	HALLMARK_PANCREAS_BETA_CELLS	40	-0.321904	-0.756598	0.845842	0.818519	0.997	2613	tags=30%, list=17%, signal=36%
HALLMARK_EPITHELIAL_MESENCHYMAL_TRANSITION	HALLMARK_EPITHELIAL_MESENCHYMAL_TRANSITION	193	-0.261536	-0.642767	0.821206	0.892657	0.999	2539	tags=29%, list=17%, signal=34%
GOMF_RIBONUCLEOPROTEIN_COMPLEX_BINDING	GOMF_RIBONUCLEOPROTEIN_COMPLEX_BINDING	119	-0.466334	-2.22102	0	0.084399	0.056	3989	tags=46%, list=26%, signal=62%
GOCC_RIBOSOME	GOCC_RIBOSOME	195	-0.459986	-2.18474	0.0056391	0.0581788	0.07	3906	tags=36%, list=25%, signal=48%
GOBP_RIBOSOME_BIOGENESIS	GOBP_RIBOSOME_BIOGENESIS	260	-0.500825	-2.18145	0	0.0401677	0.071	4484	tags=54%, list=29%, signal=75%
GOBP_RIBONUCLEOPROTEIN_COMPLEX_BIOGENESIS	GOBP_RIBONUCLEOPROTEIN_COMPLEX_BIOGENESIS	375	-0.451585	-2.16652	0.00195695	0.0346873	0.083	4530	tags=49%, list=29%, signal=68%
GOBP_TRANSLATIONAL_ELONGATION	GOBP_TRANSLATIONAL_ELONGATION	118	-0.495527	-2.06381	0.00403226	0.0835444	0.211	3906	tags=49%, list=25%, signal=65%
GOBP_MITOCHONDRIAL_TRANSLATION	GOBP_MITOCHONDRIAL_TRANSLATION	119	-0.584729	-2.06077	0.00592885	0.0723148	0.22	3974	tags=60%, list=26%, signal=80%
GOCC_NUCLEOID	GOCC_NUCLEOID	37	-0.653716	-2.05757	0	0.0640362	0.223	4613	tags=68%, list=30%, signal=96%
GOBP_RRNA_METABOLIC_PROCESS	GOBP_RRNA_METABOLIC_PROCESS	204	-0.468372	-2.05201	0.00606061	0.0587262	0.231	4484	tags=52%, list=29%, signal=73%
GOBP_MITOCHONDRIAL_GENE_EXPRESSION	GOBP_MITOCHONDRIAL_GENE_EXPRESSION	140	-0.564926	-2.04442	0.0060241	0.0564413	0.249	4351	tags=63%, list=28%, signal=87%
GOBP_RIBOSOMAL_SMALL_SUBUNIT_BIOGENESIS	GOBP_RIBOSOMAL_SMALL_SUBUNIT_BIOGENESIS	63	-0.542355	-2.03842	0	0.0542353	0.259	4484	tags=56%, list=29%, signal=78%
GOCC_ENDORIBONUCLEASE_COMPLEX	GOCC_ENDORIBONUCLEASE_COMPLEX	23	-0.592836	-2.03243	0	0.053038	0.276	3554	tags=61%, list=23%, signal=79%
GOBP_RRNA_TRANSCRIPTION	GOBP_RRNA_TRANSCRIPTION	25	-0.54746	-2.02394	0.004	0.0527333	0.285	4788	tags=76%, list=31%, signal=110%
GOBP_NCRNA_METABOLIC_PROCESS	GOBP_NCRNA_METABOLIC_PROCESS	387	-0.433243	-2.0092	0.00401606	0.0572129	0.311	4062	tags=44%, list=26%, signal=59%
GOBP_AMINO_ACID_ACTIVATION	GOBP_AMINO_ACID_ACTIVATION	28	-0.621433	-2.00633	0.00590551	0.0547031	0.322	3886	tags=54%, list=25%, signal=72%
GOBP_NCRNA_PROCESSING	GOBP_NCRNA_PROCESSING	319	-0.44501	-2.00272	0.0101215	0.0524369	0.328	4516	tags=49%, list=29%, signal=68%
GOCC_MITOCHONDRIAL_PROTEIN_CONTAINING_COMPLEX	GOCC_MITOCHONDRIAL_PROTEIN_CONTAINING_COMPLEX	203	-0.4755	-1.98326	0.0272374	0.0605407	0.375	4359	tags=53%, list=28%, signal=73%
GOBP_POSITIVE_REGULATION_OF_TELOMERASE_RNA_LOCALIZATION_TO_CAJAL_BODY	GOBP_POSITIVE_REGULATION_OF_TELOMERASE_RNA_LOCALIZATION_TO_CAJAL_BODY	15	-0.733391	-1.97904	0	0.0591376	0.385	3148	tags=73%, list=20%, signal=92%
GOCC_RIBOSOMAL_SUBUNIT	GOCC_RIBOSOMAL_SUBUNIT	162	-0.460344	-1.97528	0.0278884	0.0576672	0.387	4558	tags=41%, list=30%, signal=57%
GOBP_RIBOSOME_ASSEMBLY	GOBP_RIBOSOME_ASSEMBLY	51	-0.527289	-1.95547	0.0102669	0.0669567	0.445	3999	tags=43%, list=26%, signal=58%
GOBP_RIBOSOMAL_LARGE_SUBUNIT_BIOGENESIS	GOBP_RIBOSOMAL_LARGE_SUBUNIT_BIOGENESIS	60	-0.560137	-1.95545	0.00816326	0.0636089	0.445	4588	tags=55%, list=30%, signal=78%
GOBP_MATURATION_OF_SSU_RRNA_FROM_TRICISTRONIC_RRNA_TRANSCRIPT_SSU_RRNA_5_8S_RRNA_LSU_RRNA	GOBP_MATURATION_OF_SSU_RRNA_FROM_TRICISTRONIC_RRNA_TRANSCRIPT_SSU_RRNA_5_8S_RRNA_LSU_RRNA	32	-0.623699	-1.9523	0.00204499	0.0623654	0.455	4484	tags=66%, list=29%, signal=92%
GOBP_REGULATION_OF_CELL_AGING	GOBP_REGULATION_OF_CELL_AGING	45	-0.619946	-1.95098	0	0.0600157	0.46	1842	tags=40%, list=12%, signal=45%
GOCC_SMN_SM_PROTEIN_COMPLEX	GOCC_SMN_SM_PROTEIN_COMPLEX	15	-0.691628	-1.94758	0.00194932	0.0593592	0.473	3235	tags=60%, list=21%, signal=76%
GOCC_PEPTIDASE_COMPLEX	GOCC_PEPTIDASE_COMPLEX	81	-0.428607	-1.9421	0.0138067	0.0599285	0.496	5450	tags=56%, list=35%, signal=86%
GOCC_SMALL_SUBUNIT_PROCESSOME	GOCC_SMALL_SUBUNIT_PROCESSOME	34	-0.580461	-1.92831	0.00606061	0.065017	0.536	5061	tags=71%, list=33%, signal=105%
GOMF_LIGASE_ACTIVITY_FORMING_CARBON_OXYGEN_BONDS	GOMF_LIGASE_ACTIVITY_FORMING_CARBON_OXYGEN_BONDS	21	-0.634114	-1.92475	0.00578035	0.0645076	0.547	3886	tags=57%, list=25%, signal=76%
GOCC_LARGE_RIBOSOMAL_SUBUNIT	GOCC_LARGE_RIBOSOMAL_SUBUNIT	98	-0.486123	-1.91222	0.0298211	0.0690238	0.578	4198	tags=39%, list=27%, signal=53%
GOBP_SPLICEOSOMAL_SNRNP_ASSEMBLY	GOBP_SPLICEOSOMAL_SNRNP_ASSEMBLY	34	-0.570973	-1.91031	0.00608519	0.0677261	0.583	3642	tags=47%, list=24%, signal=62%
GOBP_DNA_TEMPLATED_TRANSCRIPTION_ELONGATION	GOBP_DNA_TEMPLATED_TRANSCRIPTION_ELONGATION	96	-0.39357	-1.90717	0.0259481	0.0675201	0.597	4942	tags=47%, list=32%, signal=69%
GOCC_PRERIBOSOME	GOCC_PRERIBOSOME	71	-0.551904	-1.90455	0.0164609	0.0664317	0.602	4457	tags=63%, list=29%, signal=89%
GOMF_STRUCTURAL_CONSTITUENT_OF_RIBOSOME	GOMF_STRUCTURAL_CONSTITUENT_OF_RIBOSOME	144	-0.459784	-1.90024	0.0399202	0.0671303	0.615	4558	tags=40%, list=30%, signal=57%
GOCC_ORGANELLAR_RIBOSOME	GOCC_ORGANELLAR_RIBOSOME	78	-0.58309	-1.8988	0.0158416	0.0659796	0.621	3906	tags=60%, list=25%, signal=80%
GOBP_MATURATION_OF_SSU_RRNA	GOBP_MATURATION_OF_SSU_RRNA	42	-0.549715	-1.89446	0.00400802	0.0665761	0.635	4484	tags=62%, list=29%, signal=87%
GOBP_DNA_TEMPLATED_TRANSCRIPTION_TERMINATION	GOBP_DNA_TEMPLATED_TRANSCRIPTION_TERMINATION	63	-0.48612	-1.88126	0.0123203	0.0743316	0.684	3538	tags=46%, list=23%, signal=60%
GOBP_MITOCHONDRIAL_TRANSLATIONAL_TERMINATION	GOBP_MITOCHONDRIAL_TRANSLATIONAL_TERMINATION	84	-0.566231	-1.88089	0.0200401	0.0723899	0.684	3906	tags=58%, list=25%, signal=78%
GOBP_ATP_DEPENDENT_CHROMATIN_REMODELING	GOBP_ATP_DEPENDENT_CHROMATIN_REMODELING	67	-0.583735	-1.8802	0.00792079	0.0709874	0.688	1157	tags=21%, list=8%, signal=22%
GOBP_PROTEIN_TRANSMEMBRANE_IMPORT_INTO_INTRACELLULAR_ORGANELLE	GOBP_PROTEIN_TRANSMEMBRANE_IMPORT_INTO_INTRACELLULAR_ORGANELLE	30	-0.560314	-1.87968	0.00796813	0.0694953	0.689	4687	tags=60%, list=31%, signal=86%
GOBP_NCRNA_TRANSCRIPTION	GOBP_NCRNA_TRANSCRIPTION	92	-0.406488	-1.8792	0.0193798	0.0680098	0.69	5270	tags=61%, list=34%, signal=92%
GOBP_NUCLEOBASE_BIOSYNTHETIC_PROCESS	GOBP_NUCLEOBASE_BIOSYNTHETIC_PROCESS	17	-0.753484	-1.87228	0	0.0702266	0.71	3539	tags=82%, list=23%, signal=107%
GOCC_SNO_S_RNA_CONTAINING_RIBONUCLEOPROTEIN_COMPLEX	GOCC_SNO_S_RNA_CONTAINING_RIBONUCLEOPROTEIN_COMPLEX	22	-0.643681	-1.86506	0.00618557	0.0732457	0.735	5018	tags=82%, list=33%, signal=121%
GOCC_SMALL_RIBOSOMAL_SUBUNIT	GOCC_SMALL_RIBOSOMAL_SUBUNIT	66	-0.460567	-1.85122	0.0218688	0.0805705	0.768	4558	tags=44%, list=30%, signal=62%
GOBP_REGULATION_OF_MITOTIC_SPINDLE_ASSEMBLY	GOBP_REGULATION_OF_MITOTIC_SPINDLE_ASSEMBLY	16	-0.637111	-1.8466	0.0063425	0.0821381	0.78	3567	tags=50%, list=23%, signal=65%
GOBP_CYTOKINETIC_PROCESS	GOBP_CYTOKINETIC_PROCESS	37	-0.617102	-1.84337	0	0.082573	0.793	1302	tags=27%, list=8%, signal=29%
GOCC_MITOCHONDRIAL_LARGE_RIBOSOMAL_SUBUNIT	GOCC_MITOCHONDRIAL_LARGE_RIBOSOMAL_SUBUNIT	50	-0.58335	-1.83549	0.0239521	0.0870088	0.811	3906	tags=60%, list=25%, signal=80%
GOCC_SPINDLE_MICROTUBULE	GOCC_SPINDLE_MICROTUBULE	59	-0.672402	-1.83492	0.00404858	0.0855561	0.812	465	tags=22%, list=3%, signal=23%
GOCC_SPLICEOSOMAL_TRI_SNRNP_COMPLEX	GOCC_SPLICEOSOMAL_TRI_SNRNP_COMPLEX	29	-0.58128	-1.83301	0.0100806	0.0853235	0.817	3858	tags=52%, list=25%, signal=69%
GOBP_CHROMOSOME_LOCALIZATION	GOBP_CHROMOSOME_LOCALIZATION	72	-0.669047	-1.82717	0.00408163	0.0883947	0.837	999	tags=25%, list=7%, signal=27%
GOBP_MITOTIC_SPINDLE_ASSEMBLY	GOBP_MITOTIC_SPINDLE_ASSEMBLY	55	-0.667911	-1.82472	0.00603622	0.0884121	0.844	1158	tags=27%, list=8%, signal=29%
GOBP_RIBONUCLEOPROTEIN_COMPLEX_SUBUNIT_ORGANIZATION	GOBP_RIBONUCLEOPROTEIN_COMPLEX_SUBUNIT_ORGANIZATION	171	-0.3608	-1.82462	0.0275591	0.086686	0.845	3824	tags=33%, list=25%, signal=43%
GOBP_HISTONE_EXCHANGE	GOBP_HISTONE_EXCHANGE	37	-0.754008	-1.81738	0	0.0907022	0.862	1157	tags=38%, list=8%, signal=41%
GOBP_RRNA_MODIFICATION	GOBP_RRNA_MODIFICATION	29	-0.514226	-1.81497	0.0301811	0.0910543	0.866	5018	tags=62%, list=33%, signal=92%
GOBP_REGULATION_OF_SPINDLE_ORGANIZATION	GOBP_REGULATION_OF_SPINDLE_ORGANIZATION	37	-0.544766	-1.81442	0.00835073	0.0897774	0.868	2479	tags=30%, list=16%, signal=35%
GOBP_MITOCHONDRIAL_RNA_METABOLIC_PROCESS	GOBP_MITOCHONDRIAL_RNA_METABOLIC_PROCESS	35	-0.566747	-1.81268	0.0204499	0.089337	0.876	4151	tags=66%, list=27%, signal=90%
GOBP_NUCLEAR_ENVELOPE_REASSEMBLY	GOBP_NUCLEAR_ENVELOPE_REASSEMBLY	18	-0.553963	-1.80667	0.0177165	0.0926231	0.888	5460	tags=61%, list=36%, signal=95%
GOBP_TRANSLATIONAL_TERMINATION	GOBP_TRANSLATIONAL_TERMINATION	96	-0.488197	-1.80663	0.0438247	0.0909919	0.888	3906	tags=54%, list=25%, signal=72%
GOBP_TELOMERASE_RNA_LOCALIZATION	GOBP_TELOMERASE_RNA_LOCALIZATION	19	-0.592285	-1.80522	0.00635593	0.0904888	0.891	3148	tags=58%, list=20%, signal=73%
GOBP_TRNA_METABOLIC_PROCESS	GOBP_TRNA_METABOLIC_PROCESS	131	-0.452279	-1.8044	0.0337972	0.0895586	0.891	5329	tags=62%, list=35%, signal=94%
GOCC_RNA_POLYMERASE_COMPLEX	GOCC_RNA_POLYMERASE_COMPLEX	92	-0.437036	-1.80175	0.0352251	0.0899499	0.897	4727	tags=55%, list=31%, signal=80%
GOBP_REGULATION_OF_MITOCHONDRIAL_GENE_EXPRESSION	GOBP_REGULATION_OF_MITOCHONDRIAL_GENE_EXPRESSION	21	-0.568574	-1.80148	0.016	0.0887081	0.897	4589	tags=67%, list=30%, signal=95%
GOBP_G0_TO_G1_TRANSITION	GOBP_G0_TO_G1_TRANSITION	39	-0.591409	-1.79785	0.00994036	0.0902253	0.902	1793	tags=26%, list=12%, signal=29%
GOMF_SNORNA_BINDING	GOMF_SNORNA_BINDING	30	-0.528075	-1.79308	0.0303644	0.0924451	0.912	4141	tags=67%, list=27%, signal=91%
GOCC_MITOCHONDRIAL_SMALL_RIBOSOMAL_SUBUNIT	GOCC_MITOCHONDRIAL_SMALL_RIBOSOMAL_SUBUNIT	27	-0.611737	-1.78948	0.0117417	0.0939348	0.915	4558	tags=74%, list=30%, signal=105%
GOMF_CATALYTIC_ACTIVITY_ACTING_ON_A_TRNA	GOMF_CATALYTIC_ACTIVITY_ACTING_ON_A_TRNA	83	-0.474531	-1.78587	0.0372549	0.0953207	0.921	5115	tags=63%, list=33%, signal=93%
GOBP_MICROTUBULE_CYTOSKELETON_ORGANIZATION_INVOLVED_IN_MITOSIS	GOBP_MICROTUBULE_CYTOSKELETON_ORGANIZATION_INVOLVED_IN_MITOSIS	125	-0.599187	-1.7813	0.0204082	0.0980244	0.928	1662	tags=30%, list=11%, signal=33%
GOCC_PRECATALYTIC_SPLICEOSOME	GOCC_PRECATALYTIC_SPLICEOSOME	48	-0.468079	-1.77767	0.0240964	0.0997992	0.932	3858	tags=40%, list=25%, signal=53%
GOBP_MITOTIC_SPINDLE_ORGANIZATION	GOBP_MITOTIC_SPINDLE_ORGANIZATION	102	-0.630344	-1.77251	0.01417	0.103115	0.941	1662	tags=32%, list=11%, signal=36%
GOBP_DNA_GEOMETRIC_CHANGE	GOBP_DNA_GEOMETRIC_CHANGE	103	-0.550819	-1.76879	0.0204082	0.105117	0.945	2962	tags=39%, list=19%, signal=48%
GOCC_SM_LIKE_PROTEIN_FAMILY_COMPLEX	GOCC_SM_LIKE_PROTEIN_FAMILY_COMPLEX	71	-0.42113	-1.76843	0.0342052	0.103949	0.945	3858	tags=35%, list=25%, signal=47%
GOBP_RNA_5_END_PROCESSING	GOBP_RNA_5_END_PROCESSING	18	-0.641848	-1.76588	0.0123203	0.104936	0.946	3532	tags=61%, list=23%, signal=79%
GOBP_METAPHASE_PLATE_CONGRESSION	GOBP_METAPHASE_PLATE_CONGRESSION	59	-0.70804	-1.76521	0.00619835	0.10401	0.946	999	tags=29%, list=7%, signal=31%
GOBP_MULTIVESICULAR_BODY_ORGANIZATION	GOBP_MULTIVESICULAR_BODY_ORGANIZATION	29	-0.4896	-1.75912	0.02079	0.108633	0.951	3709	tags=38%, list=24%, signal=50%
GOBP_RIBOSOMAL_LARGE_SUBUNIT_ASSEMBLY	GOBP_RIBOSOMAL_LARGE_SUBUNIT_ASSEMBLY	24	-0.568198	-1.7573	0.0184049	0.109087	0.953	4588	tags=54%, list=30%, signal=77%
GOCC_U5_SNRNP	GOCC_U5_SNRNP	15	-0.615324	-1.75606	0.015534	0.108704	0.953	3235	tags=47%, list=21%, signal=59%
GOCC_U2_TYPE_CATALYTIC_STEP_2_SPLICEOSOME	GOCC_U2_TYPE_CATALYTIC_STEP_2_SPLICEOSOME	29	-0.500843	-1.75458	0.020284	0.10846	0.955	4200	tags=45%, list=27%, signal=62%
GOBP_MATURATION_OF_LSU_RRNA	GOBP_MATURATION_OF_LSU_RRNA	23	-0.586873	-1.74336	0.022449	0.117947	0.96	4423	tags=57%, list=29%, signal=79%
GOBP_PSEUDOURIDINE_SYNTHESIS	GOBP_PSEUDOURIDINE_SYNTHESIS	17	-0.625952	-1.74309	0.0189474	0.116609	0.96	4001	tags=82%, list=26%, signal=111%
GOCC_U2_TYPE_SPLICEOSOMAL_COMPLEX	GOCC_U2_TYPE_SPLICEOSOMAL_COMPLEX	83	-0.40446	-1.74295	0.0345528	0.115246	0.96	3858	tags=31%, list=25%, signal=42%
GOBP_MATURATION_OF_5_8S_RRNA	GOBP_MATURATION_OF_5_8S_RRNA	33	-0.550615	-1.74264	0.0292887	0.114102	0.961	4484	tags=55%, list=29%, signal=77%
GOBP_SPINDLE_ASSEMBLY	GOBP_SPINDLE_ASSEMBLY	98	-0.530784	-1.74063	0.0184426	0.114768	0.962	1253	tags=19%, list=8%, signal=21%
GOCC_ESCRT_COMPLEX	GOCC_ESCRT_COMPLEX	22	-0.548058	-1.73919	0.0182556	0.114927	0.963	3709	tags=41%, list=24%, signal=54%
GOBP_NUCLEAR_ENVELOPE_ORGANIZATION	GOBP_NUCLEAR_ENVELOPE_ORGANIZATION	49	-0.462889	-1.73537	0.0139442	0.117267	0.967	1172	tags=16%, list=8%, signal=18%
GOMF_RNA_POLYMERASE_ACTIVITY	GOMF_RNA_POLYMERASE_ACTIVITY	35	-0.52092	-1.73384	0.0332681	0.117558	0.968	4516	tags=63%, list=29%, signal=89%
GOMF_RIBOSOME_BINDING	GOMF_RIBOSOME_BINDING	46	-0.387447	-1.7277	0.0185185	0.122542	0.973	3989	tags=43%, list=26%, signal=59%
GOBP_MITOTIC_METAPHASE_PLATE_CONGRESSION	GOBP_MITOTIC_METAPHASE_PLATE_CONGRESSION	47	-0.707519	-1.72638	0.00606061	0.122361	0.974	1760	tags=36%, list=11%, signal=41%
GOBP_RRNA_METHYLATION	GOBP_RRNA_METHYLATION	18	-0.54364	-1.72536	0.0290456	0.122036	0.974	4754	tags=50%, list=31%, signal=72%
GOCC_U2_SNRNP	GOCC_U2_SNRNP	18	-0.583237	-1.72501	0.0232558	0.120976	0.974	3235	tags=39%, list=21%, signal=49%
GOBP_NEGATIVE_REGULATION_OF_DNA_REPLICATION	GOBP_NEGATIVE_REGULATION_OF_DNA_REPLICATION	31	-0.584179	-1.72387	0.0256917	0.120788	0.974	2205	tags=39%, list=14%, signal=45%
GOBP_MIDBODY_ABSCISSION	GOBP_MIDBODY_ABSCISSION	16	-0.645263	-1.72233	0.002079	0.121059	0.977	999	tags=25%, list=7%, signal=27%
GOBP_MITOTIC_SISTER_CHROMATID_SEGREGATION	GOBP_MITOTIC_SISTER_CHROMATID_SEGREGATION	148	-0.654946	-1.71689	0.0261044	0.12587	0.982	1760	tags=36%, list=11%, signal=41%
GOMF_RNA_POLYMERASE_CORE_ENZYME_BINDING	GOMF_RNA_POLYMERASE_CORE_ENZYME_BINDING	34	-0.406756	-1.71645	0.0337972	0.124941	0.982	4902	tags=47%, list=32%, signal=69%
GOCC_INTRINSIC_COMPONENT_OF_MITOCHONDRIAL_INNER_MEMBRANE	GOCC_INTRINSIC_COMPONENT_OF_MITOCHONDRIAL_INNER_MEMBRANE	39	-0.465276	-1.71636	0.0514851	0.123646	0.982	4359	tags=51%, list=28%, signal=71%
GOMF_CATALYTIC_ACTIVITY_ACTING_ON_RNA	GOMF_CATALYTIC_ACTIVITY_ACTING_ON_RNA	302	-0.355183	-1.71456	0.0178926	0.123767	0.982	4012	tags=41%, list=26%, signal=54%
GOBP_RNA_3_END_PROCESSING	GOBP_RNA_3_END_PROCESSING	124	-0.367372	-1.71083	0.06875	0.126222	0.984	4616	tags=45%, list=30%, signal=64%
GOBP_CENTROSOME_SEPARATION	GOBP_CENTROSOME_SEPARATION	15	-0.750651	-1.70827	0.00817996	0.127404	0.984	993	tags=33%, list=6%, signal=36%
GOBP_SISTER_CHROMATID_SEGREGATION	GOBP_SISTER_CHROMATID_SEGREGATION	173	-0.634683	-1.70588	0.0226804	0.128774	0.985	1760	tags=34%, list=11%, signal=38%
GOBP_REGULATION_OF_TELOMERE_MAINTENANCE_VIA_TELOMERE_LENGTHENING	GOBP_REGULATION_OF_TELOMERE_MAINTENANCE_VIA_TELOMERE_LENGTHENING	54	-0.402803	-1.70584	0.0162272	0.127472	0.985	3148	tags=33%, list=20%, signal=42%
GOMF_DNA_HELICASE_ACTIVITY	GOMF_DNA_HELICASE_ACTIVITY	67	-0.607641	-1.70485	0.0200401	0.127347	0.985	2962	tags=46%, list=19%, signal=57%
GOBP_RNA_DEPENDENT_DNA_BIOSYNTHETIC_PROCESS	GOBP_RNA_DEPENDENT_DNA_BIOSYNTHETIC_PROCESS	65	-0.384212	-1.70289	0.028169	0.128164	0.986	3148	tags=29%, list=20%, signal=37%
GOMF_UNFOLDED_PROTEIN_BINDING	GOMF_UNFOLDED_PROTEIN_BINDING	104	-0.356225	-1.70194	0.0143443	0.127996	0.987	4192	tags=43%, list=27%, signal=59%
GOCC_CONDENSED_CHROMOSOME_CENTROMERIC_REGION	GOCC_CONDENSED_CHROMOSOME_CENTROMERIC_REGION	97	-0.695882	-1.70151	0.0142566	0.127253	0.987	2137	tags=43%, list=14%, signal=50%
GOBP_OLIGOSACCHARIDE_LIPID_INTERMEDIATE_BIOSYNTHETIC_PROCESS	GOBP_OLIGOSACCHARIDE_LIPID_INTERMEDIATE_BIOSYNTHETIC_PROCESS	18	-0.536242	-1.69815	0.0461847	0.129725	0.99	5726	tags=72%, list=37%, signal=115%
GOBP_RETROGRADE_VESICLE_MEDIATED_TRANSPORT_GOLGI_TO_ENDOPLASMIC_RETICULUM	GOBP_RETROGRADE_VESICLE_MEDIATED_TRANSPORT_GOLGI_TO_ENDOPLASMIC_RETICULUM	80	-0.469164	-1.69633	0.0229167	0.130389	0.99	1556	tags=15%, list=10%, signal=17%
GOBP_DNA_DEPENDENT_DNA_REPLICATION	GOBP_DNA_DEPENDENT_DNA_REPLICATION	136	-0.619061	-1.69427	0.0323232	0.131165	0.991	2528	tags=45%, list=16%, signal=53%
GOBP_SPINDLE_ORGANIZATION	GOBP_SPINDLE_ORGANIZATION	156	-0.527276	-1.69272	0.034413	0.131447	0.991	1662	tags=25%, list=11%, signal=28%
GOBP_TERMINATION_OF_RNA_POLYMERASE_II_TRANSCRIPTION	GOBP_TERMINATION_OF_RNA_POLYMERASE_II_TRANSCRIPTION	33	-0.468304	-1.69251	0.0439122	0.130489	0.991	3538	tags=45%, list=23%, signal=59%
GOBP_BASE_EXCISION_REPAIR	GOBP_BASE_EXCISION_REPAIR	39	-0.540221	-1.69157	0.0351562	0.130268	0.992	2690	tags=36%, list=18%, signal=43%
GOMF_ENDORIBONUCLEASE_ACTIVITY_PRODUCING_5_PHOSPHOMONOESTERS	GOMF_ENDORIBONUCLEASE_ACTIVITY_PRODUCING_5_PHOSPHOMONOESTERS	23	-0.586238	-1.69151	0.0277228	0.129122	0.992	3508	tags=61%, list=23%, signal=79%
GOBP_CHROMOSOME_SEGREGATION	GOBP_CHROMOSOME_SEGREGATION	283	-0.590339	-1.6907	0.0386965	0.128726	0.992	1760	tags=29%, list=11%, signal=33%
GOCC_90S_PRERIBOSOME	GOCC_90S_PRERIBOSOME	25	-0.574007	-1.6894	0.0564516	0.129088	0.993	4457	tags=64%, list=29%, signal=90%
GOBP_REGULATION_OF_DNA_REPLICATION	GOBP_REGULATION_OF_DNA_REPLICATION	99	-0.518865	-1.68791	0.026	0.129603	0.993	2354	tags=33%, list=15%, signal=39%
GOBP_ESTABLISHMENT_OF_PROTEIN_LOCALIZATION_TO_CHROMOSOME	GOBP_ESTABLISHMENT_OF_PROTEIN_LOCALIZATION_TO_CHROMOSOME	21	-0.571971	-1.68706	0.0287474	0.129308	0.993	3148	tags=57%, list=20%, signal=72%
GOBP_TELOMERE_ORGANIZATION	GOBP_TELOMERE_ORGANIZATION	137	-0.438406	-1.68566	0.0491803	0.129684	0.993	3228	tags=34%, list=21%, signal=42%
GOBP_CELL_CYCLE_CHECKPOINT	GOBP_CELL_CYCLE_CHECKPOINT	184	-0.538161	-1.68393	0.0322581	0.130491	0.994	1427	tags=25%, list=9%, signal=27%
GOCC_OUTER_MITOCHONDRIAL_MEMBRANE_PROTEIN_COMPLEX	GOCC_OUTER_MITOCHONDRIAL_MEMBRANE_PROTEIN_COMPLEX	17	-0.531671	-1.68322	0.0386965	0.130064	0.994	4359	tags=65%, list=28%, signal=90%
GOCC_MIDBODY	GOCC_MIDBODY	170	-0.428934	-1.68301	0.0327869	0.129089	0.994	999	tags=16%, list=7%, signal=17%
GOCC_NUCLEAR_EXOSOME_RNASE_COMPLEX	GOCC_NUCLEAR_EXOSOME_RNASE_COMPLEX	15	-0.570368	-1.6821	0.0421687	0.129081	0.994	5419	tags=60%, list=35%, signal=93%
GOBP_TRNA_PROCESSING	GOBP_TRNA_PROCESSING	102	-0.41786	-1.68189	0.0589391	0.128256	0.994	5329	tags=61%, list=35%, signal=92%
GOMF_INTRAMOLECULAR_TRANSFERASE_ACTIVITY	GOMF_INTRAMOLECULAR_TRANSFERASE_ACTIVITY	25	-0.553398	-1.67991	0.0205339	0.129429	0.994	4001	tags=72%, list=26%, signal=97%
GOBP_ALDITOL_METABOLIC_PROCESS	GOBP_ALDITOL_METABOLIC_PROCESS	21	-0.676128	-1.67948	0.0101215	0.128832	0.994	2803	tags=57%, list=18%, signal=70%
GOCC_MLL1_2_COMPLEX	GOCC_MLL1_2_COMPLEX	24	-0.462914	-1.67896	0.0381526	0.128162	0.994	4298	tags=50%, list=28%, signal=69%
GOCC_POLYSOME	GOCC_POLYSOME	61	-0.425526	-1.67798	0.0300601	0.128061	0.994	4170	tags=33%, list=27%, signal=45%
GOCC_KINETOCHORE	GOCC_KINETOCHORE	118	-0.652017	-1.67794	0.022541	0.127057	0.994	1939	tags=36%, list=13%, signal=40%
GOMF_CATALYTIC_ACTIVITY_ACTING_ON_A_RRNA	GOMF_CATALYTIC_ACTIVITY_ACTING_ON_A_RRNA	17	-0.53539	-1.67241	0.046371	0.132129	0.995	4754	tags=47%, list=31%, signal=68%
GOCC_CHROMOSOME_CENTROMERIC_REGION	GOCC_CHROMOSOME_CENTROMERIC_REGION	172	-0.611887	-1.6719	0.0349076	0.131643	0.995	873	tags=25%, list=6%, signal=26%
GOBP_REGULATION_OF_SPINDLE_ASSEMBLY	GOBP_REGULATION_OF_SPINDLE_ASSEMBLY	23	-0.538096	-1.67161	0.0294118	0.130889	0.995	3567	tags=39%, list=23%, signal=51%
GOBP_NEGATIVE_REGULATION_OF_CELL_AGING	GOBP_NEGATIVE_REGULATION_OF_CELL_AGING	23	-0.669214	-1.67108	0.00426439	0.130391	0.995	1668	tags=48%, list=11%, signal=54%
GOBP_MITOTIC_CELL_CYCLE_CHECKPOINT	GOBP_MITOTIC_CELL_CYCLE_CHECKPOINT	140	-0.56391	-1.67066	0.0224033	0.129784	0.995	1427	tags=27%, list=9%, signal=30%
GOBP_INNER_MITOCHONDRIAL_MEMBRANE_ORGANIZATION	GOBP_INNER_MITOCHONDRIAL_MEMBRANE_ORGANIZATION	29	-0.47567	-1.66987	0.0359281	0.129581	0.995	4359	tags=62%, list=28%, signal=87%
GOBP_DNA_REPLICATION_INDEPENDENT_NUCLEOSOME_ORGANIZATION	GOBP_DNA_REPLICATION_INDEPENDENT_NUCLEOSOME_ORGANIZATION	32	-0.765163	-1.66964	0.0102669	0.128877	0.995	1222	tags=44%, list=8%, signal=47%
GOBP_CENTROMERE_COMPLEX_ASSEMBLY	GOBP_CENTROMERE_COMPLEX_ASSEMBLY	33	-0.819971	-1.66961	0.00409836	0.127902	0.995	1157	tags=48%, list=8%, signal=52%
GOBP_DNA_CONFORMATION_CHANGE	GOBP_DNA_CONFORMATION_CHANGE	247	-0.468983	-1.66734	0.0387755	0.129497	0.996	2897	tags=32%, list=19%, signal=39%
GOBP_ANAPHASE_PROMOTING_COMPLEX_DEPENDENT_CATABOLIC_PROCESS	GOBP_ANAPHASE_PROMOTING_COMPLEX_DEPENDENT_CATABOLIC_PROCESS	76	-0.544363	-1.66707	0.0348361	0.128791	0.996	3268	tags=33%, list=21%, signal=42%
GOCC_CHROMOSOMAL_REGION	GOCC_CHROMOSOMAL_REGION	285	-0.536892	-1.66687	0.0387755	0.128095	0.996	1561	tags=24%, list=10%, signal=26%
GOBP_MITOTIC_CYTOKINETIC_PROCESS	GOBP_MITOTIC_CYTOKINETIC_PROCESS	22	-0.557233	-1.66616	0.0328542	0.127859	0.996	1302	tags=23%, list=8%, signal=25%
GOBP_REGULATION_OF_MEIOTIC_CELL_CYCLE	GOBP_REGULATION_OF_MEIOTIC_CELL_CYCLE	42	-0.666586	-1.66541	0	0.127664	0.996	1318	tags=33%, list=9%, signal=36%
GOBP_REGULATION_OF_TELOMERE_MAINTENANCE	GOBP_REGULATION_OF_TELOMERE_MAINTENANCE	71	-0.343642	-1.66458	0.0366599	0.127475	0.996	3148	tags=27%, list=20%, signal=34%
GOBP_NCRNA_EXPORT_FROM_NUCLEUS	GOBP_NCRNA_EXPORT_FROM_NUCLEUS	33	-0.4992	-1.66429	0.0531697	0.126785	0.996	4559	tags=52%, list=30%, signal=73%
GOCC_U1_SNRNP	GOCC_U1_SNRNP	17	-0.569992	-1.66357	0.0452756	0.126664	0.996	3418	tags=47%, list=22%, signal=60%
GOCC_SPINDLE_POLE	GOCC_SPINDLE_POLE	142	-0.49221	-1.66181	0.0325866	0.127607	0.996	2484	tags=27%, list=16%, signal=32%
GOBP_POSITIVE_REGULATION_OF_UBIQUITIN_PROTEIN_TRANSFERASE_ACTIVITY	GOBP_POSITIVE_REGULATION_OF_UBIQUITIN_PROTEIN_TRANSFERASE_ACTIVITY	31	-0.523984	-1.65997	0.0357853	0.128791	0.997	942	tags=19%, list=6%, signal=21%
GOBP_CHROMATIN_REMODELING_AT_CENTROMERE	GOBP_CHROMATIN_REMODELING_AT_CENTROMERE	25	-0.831072	-1.65962	0.00203666	0.128179	0.997	1157	tags=52%, list=8%, signal=56%
GOBP_ATTACHMENT_OF_SPINDLE_MICROTUBULES_TO_KINETOCHORE	GOBP_ATTACHMENT_OF_SPINDLE_MICROTUBULES_TO_KINETOCHORE	28	-0.766467	-1.65841	0.0243408	0.128706	0.997	975	tags=39%, list=6%, signal=42%
GOBP_REGULATION_OF_MEIOTIC_NUCLEAR_DIVISION	GOBP_REGULATION_OF_MEIOTIC_NUCLEAR_DIVISION	28	-0.693808	-1.65448	0.00414938	0.131802	0.997	1271	tags=36%, list=8%, signal=39%
GOBP_REGULATION_OF_CENTROSOME_CYCLE	GOBP_REGULATION_OF_CENTROSOME_CYCLE	42	-0.536107	-1.65413	0.0226804	0.131226	0.998	1727	tags=33%, list=11%, signal=37%
GOCC_ENDOPEPTIDASE_COMPLEX	GOCC_ENDOPEPTIDASE_COMPLEX	63	-0.399995	-1.65364	0.0671785	0.130878	0.998	5450	tags=54%, list=35%, signal=83%
GOMF_RIBOSOMAL_SMALL_SUBUNIT_BINDING	GOMF_RIBOSOMAL_SMALL_SUBUNIT_BINDING	17	-0.491311	-1.65345	0.0215686	0.130192	0.998	3911	tags=41%, list=25%, signal=55%
GOBP_NUCLEAR_CHROMOSOME_SEGREGATION	GOBP_NUCLEAR_CHROMOSOME_SEGREGATION	224	-0.594793	-1.65098	0.0393375	0.131967	0.998	1760	tags=30%, list=11%, signal=34%
GOBP_RNA_EXPORT_FROM_NUCLEUS	GOBP_RNA_EXPORT_FROM_NUCLEUS	122	-0.339076	-1.64911	0.0607287	0.13303	0.998	4669	tags=45%, list=30%, signal=64%
GOCC_TELOMERASE_HOLOENZYME_COMPLEX	GOCC_TELOMERASE_HOLOENZYME_COMPLEX	21	-0.49549	-1.64906	0.0417537	0.132198	0.998	5185	tags=62%, list=34%, signal=93%
GOBP_POSITIVE_REGULATION_OF_TELOMERE_MAINTENANCE	GOBP_POSITIVE_REGULATION_OF_TELOMERE_MAINTENANCE	46	-0.394837	-1.64616	0.0375494	0.134375	0.998	3148	tags=30%, list=20%, signal=38%
GOCC_PROTEASOME_ACCESSORY_COMPLEX	GOCC_PROTEASOME_ACCESSORY_COMPLEX	23	-0.581691	-1.64583	0.0190678	0.133823	0.998	4995	tags=61%, list=33%, signal=90%
GOBP_DNA_STRAND_ELONGATION	GOBP_DNA_STRAND_ELONGATION	24	-0.749544	-1.64455	0.0125	0.134413	0.999	1883	tags=54%, list=12%, signal=62%
GOCC_SPINDLE_MIDZONE	GOCC_SPINDLE_MIDZONE	34	-0.680965	-1.64396	0.0444444	0.134157	0.999	1562	tags=38%, list=10%, signal=42%
GOBP_CELL_CYCLE_DNA_REPLICATION	GOBP_CELL_CYCLE_DNA_REPLICATION	58	-0.684621	-1.64361	0.0393375	0.133645	0.999	3228	tags=60%, list=21%, signal=76%
GOBP_NEGATIVE_REGULATION_OF_CHROMOSOME_ORGANIZATION	GOBP_NEGATIVE_REGULATION_OF_CHROMOSOME_ORGANIZATION	79	-0.595431	-1.64253	0.0432099	0.133972	0.999	1683	tags=33%, list=11%, signal=37%
GOBP_MATURATION_OF_5_8S_RRNA_FROM_TRICISTRONIC_RRNA_TRANSCRIPT_SSU_RRNA_5_8S_RRNA_LSU_RRNA	GOBP_MATURATION_OF_5_8S_RRNA_FROM_TRICISTRONIC_RRNA_TRANSCRIPT_SSU_RRNA_5_8S_RRNA_LSU_RRNA	23	-0.564446	-1.63983	0.0519751	0.136016	0.999	4484	tags=57%, list=29%, signal=80%
GOCC_NUCLEAR_UBIQUITIN_LIGASE_COMPLEX	GOCC_NUCLEAR_UBIQUITIN_LIGASE_COMPLEX	38	-0.523994	-1.63966	0.0255906	0.135316	0.999	1839	tags=24%, list=12%, signal=27%
GOBP_REGULATION_OF_DNA_DEPENDENT_DNA_REPLICATION	GOBP_REGULATION_OF_DNA_DEPENDENT_DNA_REPLICATION	43	-0.64502	-1.63814	0.0423387	0.136071	0.999	2300	tags=49%, list=15%, signal=57%
GOCC_RNA_POLYMERASE_II_HOLOENZYME	GOCC_RNA_POLYMERASE_II_HOLOENZYME	68	-0.398893	-1.63652	0.0731225	0.136951	1	5270	tags=59%, list=34%, signal=89%
GOCC_ANAPHASE_PROMOTING_COMPLEX	GOCC_ANAPHASE_PROMOTING_COMPLEX	21	-0.644212	-1.63635	0.0244898	0.136289	1	347	tags=19%, list=2%, signal=19%
GOCC_SMALL_NUCLEAR_RIBONUCLEOPROTEIN_COMPLEX	GOCC_SMALL_NUCLEAR_RIBONUCLEOPROTEIN_COMPLEX	61	-0.4034	-1.63494	0.0572597	0.13711	1	5798	tags=56%, list=38%, signal=89%
GOBP_POSITIVE_REGULATION_OF_CELL_CYCLE_G2_M_PHASE_TRANSITION	GOBP_POSITIVE_REGULATION_OF_CELL_CYCLE_G2_M_PHASE_TRANSITION	30	-0.665814	-1.63373	0.0243408	0.137652	1	1793	tags=37%, list=12%, signal=41%
GOBP_POSITIVE_REGULATION_OF_GENE_EXPRESSION_EPIGENETIC	GOBP_POSITIVE_REGULATION_OF_GENE_EXPRESSION_EPIGENETIC	44	-0.41021	-1.63271	0.0327198	0.137951	1	2353	tags=27%, list=15%, signal=32%
GOBP_REGULATION_OF_DNA_TEMPLATED_TRANSCRIPTION_ELONGATION	GOBP_REGULATION_OF_DNA_TEMPLATED_TRANSCRIPTION_ELONGATION	42	-0.393731	-1.63266	0.0506073	0.137157	1	4525	tags=38%, list=29%, signal=54%
GOBP_REGULATION_OF_CHROMOSOME_SEGREGATION	GOBP_REGULATION_OF_CHROMOSOME_SEGREGATION	81	-0.639634	-1.63245	0.048583	0.136509	1	1452	tags=36%, list=9%, signal=39%
GOMF_HELICASE_ACTIVITY	GOMF_HELICASE_ACTIVITY	142	-0.459485	-1.63234	0.0371901	0.135788	1	2962	tags=35%, list=19%, signal=42%
GOBP_DNA_REPAIR	GOBP_DNA_REPAIR	467	-0.402347	-1.63228	0.0521042	0.135036	1	3955	tags=38%, list=26%, signal=49%
GOBP_DNA_REPLICATION	GOBP_DNA_REPLICATION	251	-0.521726	-1.62992	0.0612245	0.136658	1	3147	tags=41%, list=20%, signal=51%
GOBP_TELOMERE_MAINTENANCE_VIA_SEMI_CONSERVATIVE_REPLICATION	GOBP_TELOMERE_MAINTENANCE_VIA_SEMI_CONSERVATIVE_REPLICATION	26	-0.64278	-1.62844	0.0497925	0.137429	1	3228	tags=54%, list=21%, signal=68%
GOBP_MITOTIC_NUCLEAR_DIVISION	GOBP_MITOTIC_NUCLEAR_DIVISION	267	-0.546245	-1.62806	0.0479167	0.136947	1	1794	tags=30%, list=12%, signal=33%
GOBP_TRNA_TRANSPORT	GOBP_TRNA_TRANSPORT	31	-0.484508	-1.62606	0.0576132	0.138336	1	5718	tags=65%, list=37%, signal=103%
GOCC_CONDENSED_CHROMOSOME	GOCC_CONDENSED_CHROMOSOME	180	-0.582666	-1.62567	0.0385396	0.137955	1	2518	tags=37%, list=16%, signal=43%
GOBP_MITOTIC_DNA_INTEGRITY_CHECKPOINT	GOBP_MITOTIC_DNA_INTEGRITY_CHECKPOINT	94	-0.489104	-1.62349	0.0395257	0.139597	1	2640	tags=31%, list=17%, signal=37%
GOBP_CYTOSKELETON_DEPENDENT_CYTOKINESIS	GOBP_CYTOSKELETON_DEPENDENT_CYTOKINESIS	80	-0.473166	-1.62308	0.0478088	0.139268	1	1302	tags=21%, list=8%, signal=23%
GOBP_NUCLEOSOME_ORGANIZATION	GOBP_NUCLEOSOME_ORGANIZATION	97	-0.446065	-1.62198	0.029106	0.139841	1	1294	tags=21%, list=8%, signal=22%
GOBP_CELL_CYCLE_G2_M_PHASE_TRANSITION	GOBP_CELL_CYCLE_G2_M_PHASE_TRANSITION	252	-0.440008	-1.62077	0.0268041	0.140381	1	1793	tags=19%, list=12%, signal=21%
GOBP_PROTEIN_LOCALIZATION_TO_CHROMOSOME_CENTROMERIC_REGION	GOBP_PROTEIN_LOCALIZATION_TO_CHROMOSOME_CENTROMERIC_REGION	21	-0.811695	-1.62029	0.0204082	0.140114	1	1034	tags=43%, list=7%, signal=46%
GOBP_DNA_INTEGRITY_CHECKPOINT	GOBP_DNA_INTEGRITY_CHECKPOINT	138	-0.50056	-1.61759	0.0537849	0.14241	1	2935	tags=33%, list=19%, signal=41%
GOBP_RRNA_CATABOLIC_PROCESS	GOBP_RRNA_CATABOLIC_PROCESS	18	-0.540362	-1.61757	0.0433925	0.141632	1	3429	tags=33%, list=22%, signal=43%
GOBP_ESTABLISHMENT_OF_PROTEIN_LOCALIZATION_TO_TELOMERE	GOBP_ESTABLISHMENT_OF_PROTEIN_LOCALIZATION_TO_TELOMERE	17	-0.591893	-1.61509	0.0493827	0.143648	1	3148	tags=59%, list=20%, signal=74%
GOBP_HISTONE_H2A_ACETYLATION	GOBP_HISTONE_H2A_ACETYLATION	16	-0.503772	-1.61462	0.0492126	0.143498	1	3711	tags=44%, list=24%, signal=58%
GOBP_PROTEIN_K11_LINKED_UBIQUITINATION	GOBP_PROTEIN_K11_LINKED_UBIQUITINATION	27	-0.475835	-1.61421	0.0560928	0.143099	1	3008	tags=26%, list=20%, signal=32%
GOBP_SPINDLE_LOCALIZATION	GOBP_SPINDLE_LOCALIZATION	49	-0.513715	-1.61227	0.0209644	0.144332	1	1097	tags=18%, list=7%, signal=20%
GOMF_DNA_SECONDARY_STRUCTURE_BINDING	GOMF_DNA_SECONDARY_STRUCTURE_BINDING	33	-0.656683	-1.61134	0.0102249	0.144525	1	1553	tags=39%, list=10%, signal=44%
GOCC_MRNA_CLEAVAGE_FACTOR_COMPLEX	GOCC_MRNA_CLEAVAGE_FACTOR_COMPLEX	21	-0.472691	-1.60984	0.0649606	0.145359	1	3538	tags=48%, list=23%, signal=62%
GOBP_POSITIVE_REGULATION_OF_TELOMERE_MAINTENANCE_VIA_TELOMERE_LENGTHENING	GOBP_POSITIVE_REGULATION_OF_TELOMERE_MAINTENANCE_VIA_TELOMERE_LENGTHENING	35	-0.4453	-1.60857	0.030303	0.145996	1	3148	tags=37%, list=20%, signal=47%
GOBP_PROTEIN_LOCALIZATION_TO_CHROMOSOME	GOBP_PROTEIN_LOCALIZATION_TO_CHROMOSOME	76	-0.551629	-1.60819	0.0563674	0.145629	1	3148	tags=41%, list=20%, signal=51%
GOBP_SIGNAL_TRANSDUCTION_INVOLVED_IN_CELL_CYCLE_CHECKPOINT	GOBP_SIGNAL_TRANSDUCTION_INVOLVED_IN_CELL_CYCLE_CHECKPOINT	68	-0.546999	-1.60775	0.054326	0.145392	1	1375	tags=25%, list=9%, signal=27%
GOBP_CLEAVAGE_INVOLVED_IN_RRNA_PROCESSING	GOBP_CLEAVAGE_INVOLVED_IN_RRNA_PROCESSING	26	-0.524834	-1.60763	0.075	0.144736	1	4484	tags=50%, list=29%, signal=71%
GOCC_NUCLEAR_CHROMOSOME	GOCC_NUCLEAR_CHROMOSOME	202	-0.514561	-1.60433	0.0530612	0.147636	1	2909	tags=36%, list=19%, signal=43%
GOBP_NUCLEOSIDE_MONOPHOSPHATE_BIOSYNTHETIC_PROCESS	GOBP_NUCLEOSIDE_MONOPHOSPHATE_BIOSYNTHETIC_PROCESS	39	-0.452586	-1.60345	0.0484848	0.147829	1	3671	tags=54%, list=24%, signal=71%
GOBP_SISTER_CHROMATID_COHESION	GOBP_SISTER_CHROMATID_COHESION	45	-0.60015	-1.60329	0.0613497	0.147236	1	1123	tags=22%, list=7%, signal=24%
GOCC_METHYLTRANSFERASE_COMPLEX	GOCC_METHYLTRANSFERASE_COMPLEX	84	-0.353425	-1.60203	0.0775348	0.148009	1	4868	tags=48%, list=32%, signal=69%
GOBP_POLYAMINE_METABOLIC_PROCESS	GOBP_POLYAMINE_METABOLIC_PROCESS	15	-0.579912	-1.60164	0.0486815	0.147658	1	761	tags=20%, list=5%, signal=21%
GOCC_COPI_COATED_VESICLE_MEMBRANE	GOCC_COPI_COATED_VESICLE_MEMBRANE	16	-0.556366	-1.60114	0.0493827	0.147481	1	5869	tags=81%, list=38%, signal=131%
GOCC_PRERIBOSOME_LARGE_SUBUNIT_PRECURSOR	GOCC_PRERIBOSOME_LARGE_SUBUNIT_PRECURSOR	23	-0.547509	-1.60002	0.0725806	0.148027	1	4423	tags=65%, list=29%, signal=91%
GOCC_INNER_MITOCHONDRIAL_MEMBRANE_PROTEIN_COMPLEX	GOCC_INNER_MITOCHONDRIAL_MEMBRANE_PROTEIN_COMPLEX	94	-0.378222	-1.59958	0.102713	0.147753	1	5427	tags=62%, list=35%, signal=95%
GOBP_REGULATION_OF_NUCLEAR_DIVISION	GOBP_REGULATION_OF_NUCLEAR_DIVISION	126	-0.564114	-1.59812	0.0292887	0.14873	1	1427	tags=33%, list=9%, signal=36%
GOCC_MRNA_CLEAVAGE_AND_POLYADENYLATION_SPECIFICITY_FACTOR_COMPLEX	GOCC_MRNA_CLEAVAGE_AND_POLYADENYLATION_SPECIFICITY_FACTOR_COMPLEX	17	-0.510542	-1.59402	0.0698603	0.152458	1	3453	tags=47%, list=22%, signal=61%
GOBP_DNA_PACKAGING	GOBP_DNA_PACKAGING	146	-0.458557	-1.59347	0.0408163	0.15224	1	1294	tags=21%, list=8%, signal=22%
GOBP_HISTONE_MRNA_METABOLIC_PROCESS	GOBP_HISTONE_MRNA_METABOLIC_PROCESS	21	-0.490993	-1.59329	0.0554415	0.151712	1	3453	tags=52%, list=22%, signal=67%
GOBP_RNA_LOCALIZATION	GOBP_RNA_LOCALIZATION	206	-0.300204	-1.59116	0.0542798	0.153391	1	4669	tags=44%, list=30%, signal=62%
GOBP_NEGATIVE_REGULATION_OF_CELLULAR_SENESCENCE	GOBP_NEGATIVE_REGULATION_OF_CELLULAR_SENESCENCE	18	-0.665729	-1.59063	0.01875	0.153304	1	1668	tags=50%, list=11%, signal=56%
GOBP_POSITIVE_REGULATION_OF_CELL_CYCLE_PHASE_TRANSITION	GOBP_POSITIVE_REGULATION_OF_CELL_CYCLE_PHASE_TRANSITION	90	-0.498173	-1.5876	0.0458167	0.156002	1	1380	tags=24%, list=9%, signal=27%
GOMF_DNA_REPLICATION_ORIGIN_BINDING	GOMF_DNA_REPLICATION_ORIGIN_BINDING	21	-0.751963	-1.58332	0.0222672	0.160261	1	2909	tags=76%, list=19%, signal=94%
GOCC_KINESIN_COMPLEX	GOCC_KINESIN_COMPLEX	48	-0.613539	-1.58319	0.026694	0.159653	1	1473	tags=35%, list=10%, signal=39%
GOBP_TERMINATION_OF_RNA_POLYMERASE_I_TRANSCRIPTION	GOBP_TERMINATION_OF_RNA_POLYMERASE_I_TRANSCRIPTION	25	-0.481871	-1.5808	0.0707071	0.161595	1	3427	tags=44%, list=22%, signal=57%
GOBP_NUCLEUS_ORGANIZATION	GOBP_NUCLEUS_ORGANIZATION	110	-0.333466	-1.58066	0.0273109	0.160999	1	2607	tags=21%, list=17%, signal=25%
GOBP_MRNA_3_END_PROCESSING	GOBP_MRNA_3_END_PROCESSING	88	-0.331629	-1.58013	0.0896414	0.16094	1	4616	tags=42%, list=30%, signal=60%
GOBP_MITOTIC_G2_M_TRANSITION_CHECKPOINT	GOBP_MITOTIC_G2_M_TRANSITION_CHECKPOINT	28	-0.638669	-1.57913	0.0371901	0.161354	1	1117	tags=29%, list=7%, signal=31%
GOCC_POSTSYNAPTIC_CYTOSOL	GOCC_POSTSYNAPTIC_CYTOSOL	16	-0.614102	-1.57897	0.0393701	0.160822	1	3199	tags=56%, list=21%, signal=71%
GOBP_REGULATION_OF_CELL_CYCLE_G2_M_PHASE_TRANSITION	GOBP_REGULATION_OF_CELL_CYCLE_G2_M_PHASE_TRANSITION	198	-0.445591	-1.5787	0.0554415	0.160357	1	1793	tags=19%, list=12%, signal=21%
GOBP_NEGATIVE_REGULATION_OF_CELL_CYCLE_G2_M_PHASE_TRANSITION	GOBP_NEGATIVE_REGULATION_OF_CELL_CYCLE_G2_M_PHASE_TRANSITION	93	-0.437111	-1.57766	0.0813492	0.160786	1	3422	tags=32%, list=22%, signal=41%
GOBP_RIBONUCLEOSIDE_MONOPHOSPHATE_BIOSYNTHETIC_PROCESS	GOBP_RIBONUCLEOSIDE_MONOPHOSPHATE_BIOSYNTHETIC_PROCESS	32	-0.466204	-1.57697	0.0692464	0.160949	1	3671	tags=56%, list=24%, signal=74%
GOBP_TRANSCRIPTION_ELONGATION_FROM_RNA_POLYMERASE_II_PROMOTER	GOBP_TRANSCRIPTION_ELONGATION_FROM_RNA_POLYMERASE_II_PROMOTER	74	-0.329132	-1.57627	0.0805785	0.161039	1	4669	tags=41%, list=30%, signal=58%
GOBP_DNA_REPLICATION_INITIATION	GOBP_DNA_REPLICATION_INITIATION	38	-0.680255	-1.57621	0.0461847	0.160384	1	2909	tags=61%, list=19%, signal=74%
GOBP_TRANSCRIPTION_ELONGATION_FROM_RNA_POLYMERASE_I_PROMOTER	GOBP_TRANSCRIPTION_ELONGATION_FROM_RNA_POLYMERASE_I_PROMOTER	25	-0.512683	-1.57536	0.0650888	0.160658	1	3427	tags=48%, list=22%, signal=62%
GOBP_RNA_CAPPING	GOBP_RNA_CAPPING	28	-0.44776	-1.57517	0.071579	0.160138	1	3844	tags=54%, list=25%, signal=71%
GOBP_DNA_DAMAGE_RESPONSE_DETECTION_OF_DNA_DAMAGE	GOBP_DNA_DAMAGE_RESPONSE_DETECTION_OF_DNA_DAMAGE	38	-0.467528	-1.5746	0.0922131	0.160085	1	2794	tags=34%, list=18%, signal=42%
GOMF_NUCLEOCYTOPLASMIC_CARRIER_ACTIVITY	GOMF_NUCLEOCYTOPLASMIC_CARRIER_ACTIVITY	28	-0.434194	-1.57373	0.0811881	0.160431	1	3537	tags=39%, list=23%, signal=51%
GOBP_SNRNA_TRANSCRIPTION	GOBP_SNRNA_TRANSCRIPTION	67	-0.357177	-1.57181	0.0694981	0.16201	1	5270	tags=54%, list=34%, signal=81%
GOBP_G2_DNA_DAMAGE_CHECKPOINT	GOBP_G2_DNA_DAMAGE_CHECKPOINT	28	-0.618836	-1.57124	0.045082	0.16189	1	1117	tags=29%, list=7%, signal=31%
GOBP_CYTOKINESIS	GOBP_CYTOKINESIS	144	-0.434057	-1.56979	0.0558882	0.162871	1	1097	tags=16%, list=7%, signal=17%
GOCC_ORGANELLE_INNER_MEMBRANE	GOCC_ORGANELLE_INNER_MEMBRANE	443	-0.297097	-1.56906	0.0588235	0.162992	1	4359	tags=45%, list=28%, signal=62%
GOMF_RRNA_BINDING	GOMF_RRNA_BINDING	54	-0.365659	-1.56713	0.0930693	0.164698	1	4589	tags=43%, list=30%, signal=61%
GOMF_STRUCTURAL_CONSTITUENT_OF_NUCLEAR_PORE	GOMF_STRUCTURAL_CONSTITUENT_OF_NUCLEAR_PORE	22	-0.498488	-1.56581	0.0964567	0.165576	1	6269	tags=73%, list=41%, signal=123%
GOMF_N_ACETYLTRANSFERASE_ACTIVITY	GOMF_N_ACETYLTRANSFERASE_ACTIVITY	60	-0.372627	-1.56419	0.0440252	0.166812	1	3627	tags=35%, list=24%, signal=46%
GOBP_SNRNA_PROCESSING	GOBP_SNRNA_PROCESSING	22	-0.491111	-1.56416	0.0622407	0.166096	1	3809	tags=45%, list=25%, signal=60%
GOBP_REGULATION_OF_CHROMOSOME_SEPARATION	GOBP_REGULATION_OF_CHROMOSOME_SEPARATION	67	-0.634136	-1.56415	0.0784708	0.165375	1	1452	tags=37%, list=9%, signal=41%
GOMF_FOUR_WAY_JUNCTION_DNA_BINDING	GOMF_FOUR_WAY_JUNCTION_DNA_BINDING	17	-0.662627	-1.56413	0.0489796	0.164668	1	1553	tags=35%, list=10%, signal=39%
GOBP_NEGATIVE_REGULATION_OF_CELL_CYCLE_PROCESS	GOBP_NEGATIVE_REGULATION_OF_CELL_CYCLE_PROCESS	304	-0.4063	-1.56284	0.0588235	0.165533	1	1528	tags=19%, list=10%, signal=21%
GOCC_CHROMOCENTER	GOCC_CHROMOCENTER	15	-0.769872	-1.56186	0.0356394	0.165948	1	639	tags=33%, list=4%, signal=35%
GOBP_PROTEIN_LOCALIZATION_TO_CHROMATIN	GOBP_PROTEIN_LOCALIZATION_TO_CHROMATIN	22	-0.595432	-1.56033	0.0795918	0.167075	1	2146	tags=36%, list=14%, signal=42%
GOBP_CHROMOSOME_CONDENSATION	GOBP_CHROMOSOME_CONDENSATION	30	-0.637549	-1.55986	0.0515464	0.166937	1	1117	tags=30%, list=7%, signal=32%
GOBP_REGULATION_OF_SISTER_CHROMATID_COHESION	GOBP_REGULATION_OF_SISTER_CHROMATID_COHESION	17	-0.613096	-1.55911	0.0641283	0.167145	1	1025	tags=24%, list=7%, signal=25%
GOCC_INO80_TYPE_COMPLEX	GOCC_INO80_TYPE_COMPLEX	24	-0.438789	-1.55898	0.0836653	0.166575	1	5091	tags=58%, list=33%, signal=87%
GOBP_TETRAHYDROFOLATE_METABOLIC_PROCESS	GOBP_TETRAHYDROFOLATE_METABOLIC_PROCESS	16	-0.597894	-1.55835	0.0376984	0.166574	1	3368	tags=75%, list=22%, signal=96%
GOBP_DOUBLE_STRAND_BREAK_REPAIR	GOBP_DOUBLE_STRAND_BREAK_REPAIR	209	-0.465668	-1.55829	0.0703934	0.165935	1	2690	tags=31%, list=18%, signal=37%
GOBP_VIRAL_BUDDING	GOBP_VIRAL_BUDDING	23	-0.466371	-1.55814	0.0691824	0.165418	1	3709	tags=39%, list=24%, signal=52%
GOBP_REGULATION_OF_DNA_REPAIR	GOBP_REGULATION_OF_DNA_REPAIR	105	-0.43045	-1.55808	0.0564854	0.164799	1	2935	tags=33%, list=19%, signal=41%
GOBP_BINDING_OF_SPERM_TO_ZONA_PELLUCIDA	GOBP_BINDING_OF_SPERM_TO_ZONA_PELLUCIDA	39	-0.560405	-1.55641	0.0163934	0.166276	1	3887	tags=59%, list=25%, signal=79%
GOMF_DNA_DEPENDENT_ATPASE_ACTIVITY	GOMF_DNA_DEPENDENT_ATPASE_ACTIVITY	48	-0.553213	-1.55545	0.0763052	0.166786	1	2962	tags=38%, list=19%, signal=46%
GOBP_PROTEIN_LOCALIZATION_TO_CHROMOSOME_TELOMERIC_REGION	GOBP_PROTEIN_LOCALIZATION_TO_CHROMOSOME_TELOMERIC_REGION	28	-0.43927	-1.55508	0.0910931	0.166553	1	3148	tags=43%, list=20%, signal=54%
GOMF_SIGNAL_SEQUENCE_BINDING	GOMF_SIGNAL_SEQUENCE_BINDING	40	-0.36641	-1.55472	0.0533881	0.166274	1	4402	tags=43%, list=29%, signal=59%
GOBP_ORGANELLE_FISSION	GOBP_ORGANELLE_FISSION	414	-0.491523	-1.55393	0.0517598	0.166506	1	1468	tags=24%, list=10%, signal=26%
GOBP_INTERSTRAND_CROSS_LINK_REPAIR	GOBP_INTERSTRAND_CROSS_LINK_REPAIR	46	-0.585253	-1.55322	0.0665323	0.166607	1	1427	tags=24%, list=9%, signal=26%
GOMF_MRNA_5_UTR_BINDING	GOMF_MRNA_5_UTR_BINDING	24	-0.600492	-1.55172	0.0356394	0.167653	1	3558	tags=50%, list=23%, signal=65%
GOBP_CHROMOSOME_SEPARATION	GOBP_CHROMOSOME_SEPARATION	85	-0.600485	-1.55097	0.0816327	0.167844	1	1452	tags=32%, list=9%, signal=35%
GOMF_3_5_DNA_HELICASE_ACTIVITY	GOMF_3_5_DNA_HELICASE_ACTIVITY	16	-0.613215	-1.55047	0.057732	0.167775	1	3427	tags=50%, list=22%, signal=64%
GOCC_HETEROCHROMATIN	GOCC_HETEROCHROMATIN	61	-0.476919	-1.55042	0.0669371	0.167175	1	3072	tags=36%, list=20%, signal=45%
GOCC_DESMOSOME	GOCC_DESMOSOME	25	-0.656165	-1.54812	0.0306122	0.169313	1	1940	tags=48%, list=13%, signal=55%
GOCC_CYCLIN_DEPENDENT_PROTEIN_KINASE_HOLOENZYME_COMPLEX	GOCC_CYCLIN_DEPENDENT_PROTEIN_KINASE_HOLOENZYME_COMPLEX	41	-0.539528	-1.54791	0.0626263	0.168925	1	2158	tags=34%, list=14%, signal=40%
GOCC_ROUGH_ENDOPLASMIC_RETICULUM_MEMBRANE	GOCC_ROUGH_ENDOPLASMIC_RETICULUM_MEMBRANE	23	-0.463726	-1.54703	0.045082	0.169347	1	4738	tags=48%, list=31%, signal=69%
GOBP_PROTEIN_DNA_COMPLEX_SUBUNIT_ORGANIZATION	GOBP_PROTEIN_DNA_COMPLEX_SUBUNIT_ORGANIZATION	186	-0.408495	-1.5469	0.0782241	0.16883	1	1294	tags=16%, list=8%, signal=17%
GOBP_MITOTIC_CYTOKINESIS	GOBP_MITOTIC_CYTOKINESIS	67	-0.453508	-1.54599	0.0884086	0.169201	1	999	tags=19%, list=7%, signal=21%
GOBP_METAPHASE_ANAPHASE_TRANSITION_OF_CELL_CYCLE	GOBP_METAPHASE_ANAPHASE_TRANSITION_OF_CELL_CYCLE	61	-0.645488	-1.54452	0.0795918	0.17033	1	1427	tags=38%, list=9%, signal=41%
GOBP_PROTEIN_LOCALIZATION_TO_KINETOCHORE	GOBP_PROTEIN_LOCALIZATION_TO_KINETOCHORE	15	-0.818896	-1.54323	0.027027	0.171198	1	1034	tags=47%, list=7%, signal=50%
GOBP_MITOTIC_G1_S_TRANSITION_CHECKPOINT	GOBP_MITOTIC_G1_S_TRANSITION_CHECKPOINT	58	-0.479056	-1.54299	0.072407	0.170846	1	2640	tags=29%, list=17%, signal=35%
GOBP_REGULATION_OF_MITOTIC_SISTER_CHROMATID_SEGREGATION	GOBP_REGULATION_OF_MITOTIC_SISTER_CHROMATID_SEGREGATION	42	-0.673449	-1.54074	0.0818363	0.172832	1	1452	tags=45%, list=9%, signal=50%
GOBP_ESTABLISHMENT_OF_MITOTIC_SPINDLE_LOCALIZATION	GOBP_ESTABLISHMENT_OF_MITOTIC_SPINDLE_LOCALIZATION	30	-0.527385	-1.53929	0.0762712	0.173935	1	872	tags=20%, list=6%, signal=21%
GOBP_POSITIVE_REGULATION_OF_CELL_CYCLE_PROCESS	GOBP_POSITIVE_REGULATION_OF_CELL_CYCLE_PROCESS	262	-0.431658	-1.53763	0.0423387	0.17525	1	1427	tags=21%, list=9%, signal=23%
GOBP_PROTEIN_HYDROXYLATION	GOBP_PROTEIN_HYDROXYLATION	19	-0.598177	-1.53716	0.0884774	0.175159	1	3673	tags=58%, list=24%, signal=76%
GOBP_NEGATIVE_REGULATION_OF_NUCLEAR_DIVISION	GOBP_NEGATIVE_REGULATION_OF_NUCLEAR_DIVISION	52	-0.646311	-1.53489	0.0627615	0.17734	1	1427	tags=42%, list=9%, signal=46%
GOBP_MRNA_CLEAVAGE	GOBP_MRNA_CLEAVAGE	19	-0.432572	-1.53371	0.0578512	0.178193	1	4530	tags=58%, list=29%, signal=82%
GOBP_NEGATIVE_REGULATION_OF_DNA_REPAIR	GOBP_NEGATIVE_REGULATION_OF_DNA_REPAIR	26	-0.584822	-1.53366	0.0612245	0.177595	1	2375	tags=35%, list=15%, signal=41%
GOBP_TRANSCRIPTION_BY_RNA_POLYMERASE_I	GOBP_TRANSCRIPTION_BY_RNA_POLYMERASE_I	55	-0.382072	-1.5278	0.0865979	0.184457	1	4942	tags=56%, list=32%, signal=83%
GOBP_REGULATION_OF_CYTOKINESIS	GOBP_REGULATION_OF_CYTOKINESIS	81	-0.496935	-1.52779	0.0521921	0.18378	1	975	tags=17%, list=6%, signal=18%
GOCC_SPINDLE	GOCC_SPINDLE	334	-0.408852	-1.52643	0.0717132	0.184753	1	1302	tags=16%, list=8%, signal=17%
GOMF_CATALYTIC_ACTIVITY_ACTING_ON_DNA	GOMF_CATALYTIC_ACTIVITY_ACTING_ON_DNA	182	-0.422744	-1.5258	0.0749507	0.184855	1	2405	tags=29%, list=16%, signal=33%
GOBP_MEIOTIC_CELL_CYCLE_PROCESS	GOBP_MEIOTIC_CELL_CYCLE_PROCESS	152	-0.580684	-1.52391	0.039501	0.186492	1	1452	tags=28%, list=9%, signal=31%
GOBP_REGULATION_OF_MITOTIC_NUCLEAR_DIVISION	GOBP_REGULATION_OF_MITOTIC_NUCLEAR_DIVISION	103	-0.561903	-1.52363	0.0701031	0.186146	1	1427	tags=34%, list=9%, signal=37%
GOBP_VIRAL_BUDDING_VIA_HOST_ESCRT_COMPLEX	GOBP_VIRAL_BUDDING_VIA_HOST_ESCRT_COMPLEX	19	-0.500939	-1.52334	0.0888889	0.185868	1	3709	tags=37%, list=24%, signal=49%
GOMF_2_OXOGLUTARATE_DEPENDENT_DIOXYGENASE_ACTIVITY	GOMF_2_OXOGLUTARATE_DEPENDENT_DIOXYGENASE_ACTIVITY	35	-0.475133	-1.52224	0.0715706	0.186533	1	2111	tags=26%, list=14%, signal=30%
GOBP_DNA_STRAND_ELONGATION_INVOLVED_IN_DNA_REPLICATION	GOBP_DNA_STRAND_ELONGATION_INVOLVED_IN_DNA_REPLICATION	18	-0.76997	-1.52212	0.0334728	0.186003	1	1883	tags=67%, list=12%, signal=76%
GOBP_REGULATION_OF_CELL_CYCLE_PHASE_TRANSITION	GOBP_REGULATION_OF_CELL_CYCLE_PHASE_TRANSITION	410	-0.381779	-1.5205	0.074	0.187464	1	1458	tags=17%, list=9%, signal=18%
GOBP_CENTROSOME_DUPLICATION	GOBP_CENTROSOME_DUPLICATION	65	-0.468414	-1.51936	0.0793651	0.188329	1	3109	tags=40%, list=20%, signal=50%
GOCC_INTRINSIC_COMPONENT_OF_MITOCHONDRIAL_MEMBRANE	GOCC_INTRINSIC_COMPONENT_OF_MITOCHONDRIAL_MEMBRANE	66	-0.355897	-1.51858	0.0909091	0.188674	1	4359	tags=44%, list=28%, signal=61%
GOBP_TELOMERE_MAINTENANCE_VIA_TELOMERE_LENGTHENING	GOBP_TELOMERE_MAINTENANCE_VIA_TELOMERE_LENGTHENING	72	-0.339365	-1.5169	0.0731707	0.190164	1	3148	tags=28%, list=20%, signal=35%
GOCC_MITOTIC_SPINDLE_POLE	GOCC_MITOTIC_SPINDLE_POLE	28	-0.601763	-1.51661	0.0737705	0.189826	1	348	tags=21%, list=2%, signal=22%
GOBP_NCRNA_3_END_PROCESSING	GOBP_NCRNA_3_END_PROCESSING	34	-0.425337	-1.51479	0.0909091	0.191631	1	4915	tags=53%, list=32%, signal=78%
GOBP_MITOCHONDRIAL_TRANSMEMBRANE_TRANSPORT	GOBP_MITOCHONDRIAL_TRANSMEMBRANE_TRANSPORT	69	-0.382396	-1.51385	0.0712871	0.192067	1	3468	tags=42%, list=23%, signal=54%
GOBP_NEGATIVE_REGULATION_OF_CELL_CYCLE_PHASE_TRANSITION	GOBP_NEGATIVE_REGULATION_OF_CELL_CYCLE_PHASE_TRANSITION	222	-0.406942	-1.51382	0.1	0.191436	1	1427	tags=19%, list=9%, signal=21%
GOBP_NEGATIVE_REGULATION_OF_METAPHASE_ANAPHASE_TRANSITION_OF_CELL_CYCLE	GOBP_NEGATIVE_REGULATION_OF_METAPHASE_ANAPHASE_TRANSITION_OF_CELL_CYCLE	39	-0.664883	-1.51357	0.0927419	0.19112	1	1427	tags=44%, list=9%, signal=48%
GOBP_NEGATIVE_REGULATION_OF_MEIOTIC_CELL_CYCLE	GOBP_NEGATIVE_REGULATION_OF_MEIOTIC_CELL_CYCLE	17	-0.6669	-1.5135	0.0382166	0.190544	1	1318	tags=41%, list=9%, signal=45%
GOBP_MEIOTIC_CELL_CYCLE	GOBP_MEIOTIC_CELL_CYCLE	206	-0.540722	-1.5117	0.0376569	0.192272	1	1452	tags=25%, list=9%, signal=28%
GOBP_MANNOSYLATION	GOBP_MANNOSYLATION	26	-0.467307	-1.5105	0.0603622	0.193353	1	3677	tags=46%, list=24%, signal=61%
GOCC_REPLICATION_FORK	GOCC_REPLICATION_FORK	56	-0.496767	-1.51019	0.104536	0.193046	1	3495	tags=43%, list=23%, signal=55%
GOBP_KINETOCHORE_ORGANIZATION	GOBP_KINETOCHORE_ORGANIZATION	18	-0.875452	-1.51005	0.0142276	0.192625	1	873	tags=61%, list=6%, signal=65%
GOBP_POSITIVE_REGULATION_OF_CHROMOSOME_SEPARATION	GOBP_POSITIVE_REGULATION_OF_CHROMOSOME_SEPARATION	17	-0.597371	-1.50957	0.0848126	0.192613	1	235	tags=18%, list=2%, signal=18%
GOCC_INTRINSIC_COMPONENT_OF_MITOCHONDRIAL_OUTER_MEMBRANE	GOCC_INTRINSIC_COMPONENT_OF_MITOCHONDRIAL_OUTER_MEMBRANE	20	-0.462327	-1.50946	0.0670732	0.192082	1	3206	tags=35%, list=21%, signal=44%
GOBP_FEMALE_MEIOTIC_NUCLEAR_DIVISION	GOBP_FEMALE_MEIOTIC_NUCLEAR_DIVISION	20	-0.73181	-1.5053	0.0414079	0.197001	1	1740	tags=45%, list=11%, signal=51%
GOBP_POSITIVE_REGULATION_OF_MITOTIC_CELL_CYCLE	GOBP_POSITIVE_REGULATION_OF_MITOTIC_CELL_CYCLE	104	-0.446448	-1.50227	0.057732	0.200256	1	1380	tags=21%, list=9%, signal=23%
GOBP_REGULATION_OF_UBIQUITIN_PROTEIN_TRANSFERASE_ACTIVITY	GOBP_REGULATION_OF_UBIQUITIN_PROTEIN_TRANSFERASE_ACTIVITY	50	-0.416592	-1.50032	0.0968379	0.202123	1	1253	tags=18%, list=8%, signal=20%
GOBP_NEGATIVE_REGULATION_OF_PROTEASOMAL_UBIQUITIN_DEPENDENT_PROTEIN_CATABOLIC_PROCESS	GOBP_NEGATIVE_REGULATION_OF_PROTEASOMAL_UBIQUITIN_DEPENDENT_PROTEIN_CATABOLIC_PROCESS	30	-0.362085	-1.49989	0.0665362	0.202044	1	1113	tags=7%, list=7%, signal=7%
GOBP_TRANSCRIPTION_INITIATION_FROM_RNA_POLYMERASE_I_PROMOTER	GOBP_TRANSCRIPTION_INITIATION_FROM_RNA_POLYMERASE_I_PROMOTER	30	-0.422443	-1.49866	0.108	0.203007	1	4942	tags=53%, list=32%, signal=78%
GOMF_UBIQUITIN_LIKE_PROTEIN_CONJUGATING_ENZYME_ACTIVITY	GOMF_UBIQUITIN_LIKE_PROTEIN_CONJUGATING_ENZYME_ACTIVITY	36	-0.420587	-1.49736	0.0887097	0.204067	1	789	tags=11%, list=5%, signal=12%
GOMF_TRNA_BINDING	GOMF_TRNA_BINDING	48	-0.377805	-1.49358	0.0884086	0.208593	1	3437	tags=33%, list=22%, signal=43%
GOCC_TRANSCRIPTION_FACTOR_TFIID_COMPLEX	GOCC_TRANSCRIPTION_FACTOR_TFIID_COMPLEX	29	-0.460297	-1.49095	0.0878243	0.21161	1	5231	tags=62%, list=34%, signal=94%
GOMF_DISULFIDE_OXIDOREDUCTASE_ACTIVITY	GOMF_DISULFIDE_OXIDOREDUCTASE_ACTIVITY	34	-0.431846	-1.4907	0.0805501	0.211243	1	3482	tags=44%, list=23%, signal=57%
GOMF_ALCOHOL_DEHYDROGENASE_NADPPLUS_ACTIVITY	GOMF_ALCOHOL_DEHYDROGENASE_NADPPLUS_ACTIVITY	19	-0.77019	-1.48993	0.0470588	0.211539	1	1591	tags=58%, list=10%, signal=65%
GOCC_MITOTIC_SPINDLE	GOCC_MITOTIC_SPINDLE	138	-0.459332	-1.48992	0.100592	0.210858	1	1302	tags=21%, list=8%, signal=23%
GOBP_SNRNA_METABOLIC_PROCESS	GOBP_SNRNA_METABOLIC_PROCESS	32	-0.401886	-1.48946	0.102083	0.210808	1	3809	tags=34%, list=25%, signal=46%
GOMF_SINGLE_STRANDED_DNA_HELICASE_ACTIVITY	GOMF_SINGLE_STRANDED_DNA_HELICASE_ACTIVITY	19	-0.725225	-1.4891	0.0567951	0.210623	1	2875	tags=74%, list=19%, signal=91%
GOBP_MEIOTIC_CHROMOSOME_SEPARATION	GOBP_MEIOTIC_CHROMOSOME_SEPARATION	19	-0.667593	-1.48898	0.066	0.210108	1	213	tags=21%, list=1%, signal=21%
GOBP_POSITIVE_REGULATION_OF_TELOMERASE_ACTIVITY	GOBP_POSITIVE_REGULATION_OF_TELOMERASE_ACTIVITY	33	-0.448258	-1.4889	0.0641822	0.209527	1	2812	tags=33%, list=18%, signal=41%
GOBP_REGULATION_OF_SIGNAL_TRANSDUCTION_BY_P53_CLASS_MEDIATOR	GOBP_REGULATION_OF_SIGNAL_TRANSDUCTION_BY_P53_CLASS_MEDIATOR	163	-0.372515	-1.48888	0.0748441	0.208865	1	3452	tags=33%, list=22%, signal=41%
GOBP_REPLICATIVE_SENESCENCE	GOBP_REPLICATIVE_SENESCENCE	16	-0.64768	-1.48877	0.0434783	0.208319	1	1852	tags=44%, list=12%, signal=50%
GOBP_REGULATION_OF_CHROMOSOME_ORGANIZATION	GOBP_REGULATION_OF_CHROMOSOME_ORGANIZATION	243	-0.369148	-1.48669	0.0985916	0.21043	1	2339	tags=23%, list=15%, signal=27%
GOMF_MANNOSYLTRANSFERASE_ACTIVITY	GOMF_MANNOSYLTRANSFERASE_ACTIVITY	21	-0.500353	-1.48633	0.0524109	0.210255	1	3651	tags=52%, list=24%, signal=69%
GOBP_REGULATION_OF_CELL_CYCLE_ARREST	GOBP_REGULATION_OF_CELL_CYCLE_ARREST	97	-0.431262	-1.48554	0.0809129	0.210718	1	1492	tags=20%, list=10%, signal=22%
GOBP_POSITIVE_REGULATION_OF_METAPHASE_ANAPHASE_TRANSITION_OF_CELL_CYCLE	GOBP_POSITIVE_REGULATION_OF_METAPHASE_ANAPHASE_TRANSITION_OF_CELL_CYCLE	15	-0.630631	-1.48471	0.0833333	0.211189	1	235	tags=20%, list=2%, signal=20%
GOMF_ATP_DEPENDENT_MICROTUBULE_MOTOR_ACTIVITY_PLUS_END_DIRECTED	GOMF_ATP_DEPENDENT_MICROTUBULE_MOTOR_ACTIVITY_PLUS_END_DIRECTED	17	-0.732395	-1.48341	0.0672098	0.212265	1	1302	tags=47%, list=8%, signal=51%
GOBP_MITOTIC_SISTER_CHROMATID_COHESION	GOBP_MITOTIC_SISTER_CHROMATID_COHESION	22	-0.542284	-1.48144	0.10084	0.214372	1	287	tags=14%, list=2%, signal=14%
GOMF_NUCLEAR_IMPORT_SIGNAL_RECEPTOR_ACTIVITY	GOMF_NUCLEAR_IMPORT_SIGNAL_RECEPTOR_ACTIVITY	18	-0.442013	-1.47745	0.115234	0.219185	1	3537	tags=39%, list=23%, signal=50%
GOBP_ESTABLISHMENT_OF_RNA_LOCALIZATION	GOBP_ESTABLISHMENT_OF_RNA_LOCALIZATION	174	-0.272062	-1.47675	0.0991903	0.219451	1	4669	tags=41%, list=30%, signal=59%
GOBP_NEGATIVE_REGULATION_OF_MITOTIC_CELL_CYCLE	GOBP_NEGATIVE_REGULATION_OF_MITOTIC_CELL_CYCLE	272	-0.384482	-1.47617	0.0973631	0.219586	1	1553	tags=19%, list=10%, signal=21%
GOCC_NUCLEAR_REPLICATION_FORK	GOCC_NUCLEAR_REPLICATION_FORK	33	-0.517628	-1.47608	0.100402	0.218996	1	3228	tags=42%, list=21%, signal=54%
GOBP_DNA_REPLICATION_CHECKPOINT	GOBP_DNA_REPLICATION_CHECKPOINT	16	-0.752639	-1.47524	0.0548523	0.219525	1	1341	tags=50%, list=9%, signal=55%
GOCC_EXORIBONUCLEASE_COMPLEX	GOCC_EXORIBONUCLEASE_COMPLEX	25	-0.390255	-1.47409	0.0884774	0.220434	1	4151	tags=36%, list=27%, signal=49%
GOCC_GAMMA_TUBULIN_COMPLEX	GOCC_GAMMA_TUBULIN_COMPLEX	17	-0.464058	-1.47273	0.107287	0.22166	1	2438	tags=29%, list=16%, signal=35%
GOBP_NUCLEOSOME_ASSEMBLY	GOBP_NUCLEOSOME_ASSEMBLY	60	-0.492342	-1.47208	0.107143	0.22188	1	1294	tags=27%, list=8%, signal=29%
GOBP_LATE_ENDOSOME_TO_VACUOLE_TRANSPORT	GOBP_LATE_ENDOSOME_TO_VACUOLE_TRANSPORT	22	-0.422086	-1.47186	0.106426	0.221521	1	3634	tags=36%, list=24%, signal=48%
GOMF_RNA_HELICASE_ACTIVITY	GOMF_RNA_HELICASE_ACTIVITY	69	-0.38747	-1.47138	0.0912698	0.221522	1	4439	tags=48%, list=29%, signal=67%
GOBP_REGULATION_OF_DOUBLE_STRAND_BREAK_REPAIR	GOBP_REGULATION_OF_DOUBLE_STRAND_BREAK_REPAIR	66	-0.461431	-1.46838	0.0819328	0.225077	1	2399	tags=30%, list=16%, signal=36%
GOBP_NONRIBOSOMAL_PEPTIDE_BIOSYNTHETIC_PROCESS	GOBP_NONRIBOSOMAL_PEPTIDE_BIOSYNTHETIC_PROCESS	17	-0.619691	-1.46716	0.0665399	0.226018	1	656	tags=35%, list=4%, signal=37%
GOBP_MONOVALENT_INORGANIC_ANION_HOMEOSTASIS	GOBP_MONOVALENT_INORGANIC_ANION_HOMEOSTASIS	15	-0.624182	-1.46622	0.0365854	0.226652	1	467	tags=27%, list=3%, signal=27%
GOMF_GENERAL_TRANSCRIPTION_INITIATION_FACTOR_ACTIVITY	GOMF_GENERAL_TRANSCRIPTION_INITIATION_FACTOR_ACTIVITY	39	-0.397602	-1.46601	0.0974155	0.226263	1	4942	tags=46%, list=32%, signal=68%
GOBP_REGULATION_OF_CENTRIOLE_REPLICATION	GOBP_REGULATION_OF_CENTRIOLE_REPLICATION	19	-0.568547	-1.46548	0.0909091	0.226316	1	2334	tags=42%, list=15%, signal=50%
GOBP_MICROTUBULE_ORGANIZING_CENTER_ORGANIZATION	GOBP_MICROTUBULE_ORGANIZING_CENTER_ORGANIZATION	130	-0.401455	-1.46147	0.0992063	0.23147	1	2438	tags=27%, list=16%, signal=32%
GOBP_RECOMBINATIONAL_REPAIR	GOBP_RECOMBINATIONAL_REPAIR	113	-0.483379	-1.46012	0.124744	0.232772	1	2630	tags=32%, list=17%, signal=38%
GOCC_CHAPERONE_COMPLEX	GOCC_CHAPERONE_COMPLEX	27	-0.402387	-1.45917	0.0965795	0.233505	1	3182	tags=52%, list=21%, signal=65%
GOBP_PEPTIDYL_PROLINE_MODIFICATION	GOBP_PEPTIDYL_PROLINE_MODIFICATION	44	-0.390148	-1.45626	0.0770791	0.236984	1	2069	tags=25%, list=13%, signal=29%
GOBP_PROTEIN_LOCALIZATION_TO_CYTOSKELETON	GOBP_PROTEIN_LOCALIZATION_TO_CYTOSKELETON	52	-0.388944	-1.45423	0.0879346	0.239176	1	1302	tags=13%, list=8%, signal=15%
GOBP_POSITIVE_REGULATION_OF_CELL_CYCLE	GOBP_POSITIVE_REGULATION_OF_CELL_CYCLE	345	-0.389802	-1.45064	0.0681818	0.243792	1	1526	tags=20%, list=10%, signal=22%
GOCC_CONDENSED_NUCLEAR_CHROMOSOME_KINETOCHORE	GOCC_CONDENSED_NUCLEAR_CHROMOSOME_KINETOCHORE	16	-0.820107	-1.45014	0.053719	0.24379	1	1468	tags=56%, list=10%, signal=62%
GOBP_MITOCHONDRIAL_MEMBRANE_ORGANIZATION	GOBP_MITOCHONDRIAL_MEMBRANE_ORGANIZATION	105	-0.29661	-1.44925	0.0942623	0.24438	1	4677	tags=49%, list=30%, signal=69%
GOBP_QUINONE_METABOLIC_PROCESS	GOBP_QUINONE_METABOLIC_PROCESS	32	-0.63717	-1.44877	0.112621	0.244427	1	1509	tags=34%, list=10%, signal=38%
GOBP_REGULATION_OF_CELLULAR_AMINO_ACID_METABOLIC_PROCESS	GOBP_REGULATION_OF_CELLULAR_AMINO_ACID_METABOLIC_PROCESS	57	-0.410428	-1.44794	0.102362	0.244975	1	4995	tags=51%, list=33%, signal=75%
GOCC_FILOPODIUM_TIP	GOCC_FILOPODIUM_TIP	15	-0.594066	-1.44734	0.0737052	0.245135	1	607	tags=20%, list=4%, signal=21%
GOBP_RNA_PHOSPHODIESTER_BOND_HYDROLYSIS_ENDONUCLEOLYTIC	GOBP_RNA_PHOSPHODIESTER_BOND_HYDROLYSIS_ENDONUCLEOLYTIC	66	-0.36224	-1.446	0.0702479	0.246498	1	3872	tags=44%, list=25%, signal=59%
GOBP_POSITIVE_REGULATION_OF_CELL_CYCLE_ARREST	GOBP_POSITIVE_REGULATION_OF_CELL_CYCLE_ARREST	74	-0.441372	-1.44492	0.115152	0.247412	1	1375	tags=19%, list=9%, signal=21%
GOBP_POSITIVE_REGULATION_OF_MEIOTIC_CELL_CYCLE	GOBP_POSITIVE_REGULATION_OF_MEIOTIC_CELL_CYCLE	19	-0.650915	-1.44395	0.0485232	0.248171	1	1318	tags=32%, list=9%, signal=35%
GOMF_TELOMERASE_RNA_BINDING	GOMF_TELOMERASE_RNA_BINDING	21	-0.410768	-1.44361	0.100971	0.248031	1	4184	tags=43%, list=27%, signal=59%
GOBP_NUCLEAR_TRANSCRIBED_MRNA_CATABOLIC_PROCESS_EXONUCLEOLYTIC	GOBP_NUCLEAR_TRANSCRIBED_MRNA_CATABOLIC_PROCESS_EXONUCLEOLYTIC	33	-0.385062	-1.44167	0.141988	0.250197	1	3889	tags=42%, list=25%, signal=57%
GOMF_L_ASCORBIC_ACID_BINDING	GOMF_L_ASCORBIC_ACID_BINDING	15	-0.5899	-1.4394	0.0968421	0.252787	1	2034	tags=33%, list=13%, signal=38%
GOCC_CELL_DIVISION_SITE	GOCC_CELL_DIVISION_SITE	54	-0.404034	-1.43773	0.0828283	0.254614	1	1240	tags=19%, list=8%, signal=20%
GOCC_SEX_CHROMOSOME	GOCC_SEX_CHROMOSOME	19	-0.528821	-1.43553	0.0968992	0.257314	1	1457	tags=21%, list=9%, signal=23%
GOBP_INTRA_GOLGI_VESICLE_MEDIATED_TRANSPORT	GOBP_INTRA_GOLGI_VESICLE_MEDIATED_TRANSPORT	29	-0.385406	-1.43524	0.12753	0.257022	1	4988	tags=52%, list=32%, signal=76%
GOBP_CARTILAGE_DEVELOPMENT_INVOLVED_IN_ENDOCHONDRAL_BONE_MORPHOGENESIS	GOBP_CARTILAGE_DEVELOPMENT_INVOLVED_IN_ENDOCHONDRAL_BONE_MORPHOGENESIS	26	-0.55613	-1.43436	0.0587045	0.257599	1	1024	tags=19%, list=7%, signal=21%
GOMF_CYCLIN_DEPENDENT_PROTEIN_SERINE_THREONINE_KINASE_REGULATOR_ACTIVITY	GOMF_CYCLIN_DEPENDENT_PROTEIN_SERINE_THREONINE_KINASE_REGULATOR_ACTIVITY	44	-0.493422	-1.4331	0.0778689	0.258863	1	1416	tags=27%, list=9%, signal=30%
GOBP_RNA_PHOSPHODIESTER_BOND_HYDROLYSIS	GOBP_RNA_PHOSPHODIESTER_BOND_HYDROLYSIS	132	-0.301982	-1.43259	0.0681818	0.258916	1	3889	tags=38%, list=25%, signal=50%
GOMF_PHOSPHATIDYLINOSITOL_4_PHOSPHATE_BINDING	GOMF_PHOSPHATIDYLINOSITOL_4_PHOSPHATE_BINDING	23	-0.457765	-1.43192	0.10728	0.259244	1	1066	tags=13%, list=7%, signal=14%
GOMF_RNA_POLYMERASE_II_GENERAL_TRANSCRIPTION_INITIATION_FACTOR_ACTIVITY	GOMF_RNA_POLYMERASE_II_GENERAL_TRANSCRIPTION_INITIATION_FACTOR_ACTIVITY	34	-0.414048	-1.43171	0.131737	0.258829	1	4942	tags=50%, list=32%, signal=74%
GOMF_TRANSLATION_ELONGATION_FACTOR_ACTIVITY	GOMF_TRANSLATION_ELONGATION_FACTOR_ACTIVITY	15	-0.479289	-1.43046	0.0995671	0.260096	1	2180	tags=27%, list=14%, signal=31%
GOBP_NADPH_REGENERATION	GOBP_NADPH_REGENERATION	16	-0.501842	-1.42922	0.130019	0.261366	1	2961	tags=44%, list=19%, signal=54%
GOMF_ACETYLTRANSFERASE_ACTIVITY	GOMF_ACETYLTRANSFERASE_ACTIVITY	83	-0.316821	-1.42903	0.0749465	0.260937	1	3627	tags=31%, list=24%, signal=41%
GOCC_PROTEIN_KINASE_COMPLEX	GOCC_PROTEIN_KINASE_COMPLEX	98	-0.352739	-1.42891	0.0903614	0.260391	1	3526	tags=36%, list=23%, signal=46%
GOMF_METHYL_CPG_BINDING	GOMF_METHYL_CPG_BINDING	22	-0.507076	-1.42824	0.111336	0.260713	1	3081	tags=41%, list=20%, signal=51%
GOMF_NUCLEAR_LOCALIZATION_SEQUENCE_BINDING	GOMF_NUCLEAR_LOCALIZATION_SEQUENCE_BINDING	21	-0.393226	-1.42823	0.109312	0.259988	1	4268	tags=43%, list=28%, signal=59%
GOMF_EXONUCLEASE_ACTIVITY_ACTIVE_WITH_EITHER_RIBO_OR_DEOXYRIBONUCLEIC_ACIDS_AND_PRODUCING_5_PHOSPHOMONOESTERS	GOMF_EXONUCLEASE_ACTIVITY_ACTIVE_WITH_EITHER_RIBO_OR_DEOXYRIBONUCLEIC_ACIDS_AND_PRODUCING_5_PHOSPHOMONOESTERS	52	-0.353437	-1.42679	0.12381	0.261523	1	3955	tags=40%, list=26%, signal=54%
GOBP_CELLULAR_SENESCENCE	GOBP_CELLULAR_SENESCENCE	62	-0.401433	-1.42298	0.075	0.26683	1	2116	tags=29%, list=14%, signal=34%
GOBP_EXIT_FROM_MITOSIS	GOBP_EXIT_FROM_MITOSIS	27	-0.460186	-1.42287	0.153551	0.266274	1	2827	tags=33%, list=18%, signal=41%
GOBP_NEGATIVE_REGULATION_OF_DNA_DEPENDENT_DNA_REPLICATION	GOBP_NEGATIVE_REGULATION_OF_DNA_DEPENDENT_DNA_REPLICATION	16	-0.588251	-1.4227	0.130952	0.265802	1	3399	tags=63%, list=22%, signal=80%
GOMF_RNA_METHYLTRANSFERASE_ACTIVITY	GOMF_RNA_METHYLTRANSFERASE_ACTIVITY	50	-0.357465	-1.42225	0.133595	0.265801	1	5090	tags=48%, list=33%, signal=72%
GOBP_CHROMATIN_REMODELING	GOBP_CHROMATIN_REMODELING	165	-0.343218	-1.42056	0.102616	0.267612	1	2897	tags=25%, list=19%, signal=31%
GOCC_SIN3_TYPE_COMPLEX	GOCC_SIN3_TYPE_COMPLEX	15	-0.444004	-1.41883	0.0958084	0.269565	1	5442	tags=53%, list=35%, signal=83%
GOBP_POSITIVE_REGULATION_OF_MRNA_SPLICING_VIA_SPLICEOSOME	GOBP_POSITIVE_REGULATION_OF_MRNA_SPLICING_VIA_SPLICEOSOME	22	-0.501713	-1.41762	0.10998	0.270716	1	2346	tags=27%, list=15%, signal=32%
GOBP_SPERMATID_NUCLEUS_DIFFERENTIATION	GOBP_SPERMATID_NUCLEUS_DIFFERENTIATION	16	-0.547757	-1.41611	0.0712788	0.272396	1	3361	tags=38%, list=22%, signal=48%
GOBP_BLASTOCYST_GROWTH	GOBP_BLASTOCYST_GROWTH	17	-0.579149	-1.41368	0.117886	0.275506	1	982	tags=24%, list=6%, signal=25%
GOCC_CATALYTIC_STEP_2_SPLICEOSOME	GOCC_CATALYTIC_STEP_2_SPLICEOSOME	79	-0.310232	-1.41353	0.155279	0.274961	1	3858	tags=24%, list=25%, signal=32%
GOBP_POSITIVE_REGULATION_OF_DNA_REPAIR	GOBP_POSITIVE_REGULATION_OF_DNA_REPAIR	59	-0.412002	-1.41334	0.0977597	0.27456	1	2011	tags=27%, list=13%, signal=31%
GOCC_U12_TYPE_SPLICEOSOMAL_COMPLEX	GOCC_U12_TYPE_SPLICEOSOMAL_COMPLEX	25	-0.428037	-1.41309	0.144578	0.274258	1	3235	tags=36%, list=21%, signal=46%
GOBP_MRNA_TRANSPORT	GOBP_MRNA_TRANSPORT	130	-0.280959	-1.41265	0.137577	0.274281	1	4669	tags=40%, list=30%, signal=57%
GOBP_NCRNA_CATABOLIC_PROCESS	GOBP_NCRNA_CATABOLIC_PROCESS	31	-0.418362	-1.41112	0.10978	0.276036	1	2771	tags=29%, list=18%, signal=35%
GOBP_UBIQUINONE_METABOLIC_PROCESS	GOBP_UBIQUINONE_METABOLIC_PROCESS	16	-0.483011	-1.40825	0.154158	0.279858	1	4944	tags=63%, list=32%, signal=92%
GOBP_POSITIVE_REGULATION_OF_DNA_REPLICATION	GOBP_POSITIVE_REGULATION_OF_DNA_REPLICATION	36	-0.511347	-1.40819	0.117647	0.279218	1	3126	tags=42%, list=20%, signal=52%
GOBP_MITOCHONDRIAL_TRANSPORT	GOBP_MITOCHONDRIAL_TRANSPORT	216	-0.264062	-1.40759	0.0894632	0.279403	1	4265	tags=40%, list=28%, signal=55%
GOBP_SIGNAL_TRANSDUCTION_BY_P53_CLASS_MEDIATOR	GOBP_SIGNAL_TRANSDUCTION_BY_P53_CLASS_MEDIATOR	242	-0.34457	-1.40721	0.118609	0.279337	1	2919	tags=26%, list=19%, signal=32%
GOCC_H4_H2A_HISTONE_ACETYLTRANSFERASE_COMPLEX	GOCC_H4_H2A_HISTONE_ACETYLTRANSFERASE_COMPLEX	18	-0.396618	-1.40592	0.117172	0.280802	1	2146	tags=22%, list=14%, signal=26%
GOCC_DNA_POLYMERASE_COMPLEX	GOCC_DNA_POLYMERASE_COMPLEX	20	-0.550819	-1.40226	0.160643	0.285909	1	3228	tags=50%, list=21%, signal=63%
GOMF_DNA_POLYMERASE_BINDING	GOMF_DNA_POLYMERASE_BINDING	16	-0.557678	-1.40203	0.138144	0.285599	1	2658	tags=38%, list=17%, signal=45%
GOCC_TRANSFERASE_COMPLEX_TRANSFERRING_PHOSPHORUS_CONTAINING_GROUPS	GOCC_TRANSFERASE_COMPLEX_TRANSFERRING_PHOSPHORUS_CONTAINING_GROUPS	229	-0.289991	-1.40149	0.116	0.285732	1	3939	tags=35%, list=26%, signal=47%
GOBP_RNA_PHOSPHODIESTER_BOND_HYDROLYSIS_EXONUCLEOLYTIC	GOBP_RNA_PHOSPHODIESTER_BOND_HYDROLYSIS_EXONUCLEOLYTIC	40	-0.334344	-1.40074	0.119843	0.286183	1	3889	tags=35%, list=25%, signal=47%
GOBP_POSITIVE_REGULATION_OF_DNA_BIOSYNTHETIC_PROCESS	GOBP_POSITIVE_REGULATION_OF_DNA_BIOSYNTHETIC_PROCESS	63	-0.369096	-1.39941	0.0860215	0.287552	1	2812	tags=35%, list=18%, signal=43%
GOBP_CELL_CYCLE_ARREST	GOBP_CELL_CYCLE_ARREST	213	-0.349549	-1.39909	0.0888889	0.287351	1	1555	tags=16%, list=10%, signal=18%
GOBP_GANGLION_DEVELOPMENT	GOBP_GANGLION_DEVELOPMENT	16	-0.684581	-1.39714	0.0763052	0.289891	1	1353	tags=44%, list=9%, signal=48%
GOBP_REGULATION_OF_DOUBLE_STRAND_BREAK_REPAIR_VIA_HOMOLOGOUS_RECOMBINATION	GOBP_REGULATION_OF_DOUBLE_STRAND_BREAK_REPAIR_VIA_HOMOLOGOUS_RECOMBINATION	37	-0.516082	-1.396	0.146186	0.291063	1	1381	tags=24%, list=9%, signal=27%
GOBP_DNA_DEPENDENT_DNA_REPLICATION_MAINTENANCE_OF_FIDELITY	GOBP_DNA_DEPENDENT_DNA_REPLICATION_MAINTENANCE_OF_FIDELITY	36	-0.523504	-1.39421	0.160243	0.293397	1	2351	tags=39%, list=15%, signal=46%
GOCC_FLEMMING_BODY	GOCC_FLEMMING_BODY	34	-0.439863	-1.39352	0.108384	0.29378	1	975	tags=18%, list=6%, signal=19%
GOMF_OXIDOREDUCTASE_ACTIVITY_ACTING_ON_NAD_P_H_QUINONE_OR_SIMILAR_COMPOUND_AS_ACCEPTOR	GOMF_OXIDOREDUCTASE_ACTIVITY_ACTING_ON_NAD_P_H_QUINONE_OR_SIMILAR_COMPOUND_AS_ACCEPTOR	51	-0.453603	-1.39294	0.174419	0.293992	1	3553	tags=31%, list=23%, signal=41%
GOBP_CELLULAR_MODIFIED_AMINO_ACID_BIOSYNTHETIC_PROCESS	GOBP_CELLULAR_MODIFIED_AMINO_ACID_BIOSYNTHETIC_PROCESS	41	-0.442681	-1.39115	0.0697211	0.296184	1	734	tags=20%, list=5%, signal=20%
GOMF_PROTEIN_DISULFIDE_OXIDOREDUCTASE_ACTIVITY	GOMF_PROTEIN_DISULFIDE_OXIDOREDUCTASE_ACTIVITY	17	-0.453908	-1.39108	0.135659	0.29556	1	3297	tags=47%, list=21%, signal=60%
GOBP_PEPTIDYL_LYSINE_DIMETHYLATION	GOBP_PEPTIDYL_LYSINE_DIMETHYLATION	17	-0.448827	-1.39037	0.149425	0.295968	1	4768	tags=41%, list=31%, signal=60%
GOBP_POSITIVE_REGULATION_OF_CYCLIN_DEPENDENT_PROTEIN_KINASE_ACTIVITY	GOBP_POSITIVE_REGULATION_OF_CYCLIN_DEPENDENT_PROTEIN_KINASE_ACTIVITY	31	-0.479034	-1.38983	0.1002	0.29609	1	2336	tags=35%, list=15%, signal=42%
GOBP_MEIOSIS_I_CELL_CYCLE_PROCESS	GOBP_MEIOSIS_I_CELL_CYCLE_PROCESS	96	-0.550081	-1.38912	0.108163	0.296488	1	1452	tags=28%, list=9%, signal=31%
GOMF_ALDO_KETO_REDUCTASE_NADP_ACTIVITY	GOMF_ALDO_KETO_REDUCTASE_NADP_ACTIVITY	25	-0.670484	-1.38778	0.0931174	0.297937	1	1134	tags=44%, list=7%, signal=47%
GOBP_HISTONE_PHOSPHORYLATION	GOBP_HISTONE_PHOSPHORYLATION	36	-0.538396	-1.38765	0.144033	0.297375	1	1172	tags=28%, list=8%, signal=30%
GOBP_REGULATION_OF_CHOLESTEROL_BIOSYNTHETIC_PROCESS	GOBP_REGULATION_OF_CHOLESTEROL_BIOSYNTHETIC_PROCESS	40	-0.399107	-1.38703	0.0961538	0.297661	1	4631	tags=55%, list=30%, signal=79%
GOBP_GLYCOSIDE_METABOLIC_PROCESS	GOBP_GLYCOSIDE_METABOLIC_PROCESS	18	-0.656467	-1.38661	0.12549	0.297577	1	869	tags=28%, list=6%, signal=29%
GOBP_DNA_DOUBLE_STRAND_BREAK_PROCESSING	GOBP_DNA_DOUBLE_STRAND_BREAK_PROCESSING	22	-0.555416	-1.38501	0.127273	0.299433	1	2538	tags=32%, list=17%, signal=38%
GOBP_NUCLEOBASE_CONTAINING_SMALL_MOLECULE_INTERCONVERSION	GOBP_NUCLEOBASE_CONTAINING_SMALL_MOLECULE_INTERCONVERSION	23	-0.482229	-1.38479	0.107071	0.299063	1	1901	tags=35%, list=12%, signal=40%
GOCC_PCG_PROTEIN_COMPLEX	GOCC_PCG_PROTEIN_COMPLEX	42	-0.345211	-1.3846	0.115385	0.298673	1	2092	tags=17%, list=14%, signal=19%
GOMF_RNA_POLYMERASE_BINDING	GOMF_RNA_POLYMERASE_BINDING	49	-0.30822	-1.38422	0.144841	0.298542	1	4989	tags=43%, list=32%, signal=63%
GOCC_CARBOXY_TERMINAL_DOMAIN_PROTEIN_KINASE_COMPLEX	GOCC_CARBOXY_TERMINAL_DOMAIN_PROTEIN_KINASE_COMPLEX	17	-0.407662	-1.38414	0.152475	0.297932	1	3427	tags=35%, list=22%, signal=45%
GOCC_POLE_PLASM	GOCC_POLE_PLASM	19	-0.651282	-1.38295	0.0925926	0.299223	1	941	tags=37%, list=6%, signal=39%
GOBP_REPLICATION_FORK_PROCESSING	GOBP_REPLICATION_FORK_PROCESSING	27	-0.557264	-1.38278	0.15275	0.298766	1	2205	tags=37%, list=14%, signal=43%
GOBP_VIRION_ASSEMBLY	GOBP_VIRION_ASSEMBLY	36	-0.351207	-1.38266	0.147638	0.298198	1	3740	tags=31%, list=24%, signal=40%
GOMF_NUCLEOTIDYLTRANSFERASE_ACTIVITY	GOMF_NUCLEOTIDYLTRANSFERASE_ACTIVITY	102	-0.306372	-1.38233	0.116832	0.297981	1	2873	tags=31%, list=19%, signal=38%
GOMF_UBIQUITIN_PROTEIN_TRANSFERASE_REGULATOR_ACTIVITY	GOMF_UBIQUITIN_PROTEIN_TRANSFERASE_REGULATOR_ACTIVITY	18	-0.506045	-1.38207	0.141414	0.297662	1	1839	tags=22%, list=12%, signal=25%
GOBP_MEIOTIC_CHROMOSOME_SEGREGATION	GOBP_MEIOTIC_CHROMOSOME_SEGREGATION	64	-0.582303	-1.37991	0.121704	0.300478	1	2457	tags=39%, list=16%, signal=46%
GOBP_MRNA_CIS_SPLICING_VIA_SPLICEOSOME	GOBP_MRNA_CIS_SPLICING_VIA_SPLICEOSOME	19	-0.428802	-1.37789	0.145957	0.303114	1	3224	tags=32%, list=21%, signal=40%
GOMF_ENDONUCLEASE_ACTIVITY_ACTIVE_WITH_EITHER_RIBO_OR_DEOXYRIBONUCLEIC_ACIDS_AND_PRODUCING_5_PHOSPHOMONOESTERS	GOMF_ENDONUCLEASE_ACTIVITY_ACTIVE_WITH_EITHER_RIBO_OR_DEOXYRIBONUCLEIC_ACIDS_AND_PRODUCING_5_PHOSPHOMONOESTERS	33	-0.440295	-1.37726	0.141104	0.303369	1	3508	tags=55%, list=23%, signal=71%
GOBP_NUCLEOTIDE_EXCISION_REPAIR_DNA_GAP_FILLING	GOBP_NUCLEOTIDE_EXCISION_REPAIR_DNA_GAP_FILLING	23	-0.427481	-1.37659	0.169291	0.303714	1	3228	tags=39%, list=21%, signal=49%
GOBP_REGULATION_OF_TELOMERE_CAPPING	GOBP_REGULATION_OF_TELOMERE_CAPPING	24	-0.408812	-1.37538	0.122047	0.304968	1	152	tags=8%, list=1%, signal=8%
GOBP_REGULATION_OF_UBIQUITIN_PROTEIN_LIGASE_ACTIVITY	GOBP_REGULATION_OF_UBIQUITIN_PROTEIN_LIGASE_ACTIVITY	23	-0.555128	-1.37418	0.142558	0.306273	1	1253	tags=30%, list=8%, signal=33%
GOBP_UBIQUITIN_DEPENDENT_PROTEIN_CATABOLIC_PROCESS_VIA_THE_MULTIVESICULAR_BODY_SORTING_PATHWAY	GOBP_UBIQUITIN_DEPENDENT_PROTEIN_CATABOLIC_PROCESS_VIA_THE_MULTIVESICULAR_BODY_SORTING_PATHWAY	20	-0.393419	-1.37244	0.149068	0.308384	1	3933	tags=30%, list=26%, signal=40%
GOBP_PROTEIN_REFOLDING	GOBP_PROTEIN_REFOLDING	20	-0.400075	-1.3679	0.162791	0.315324	1	4677	tags=45%, list=30%, signal=65%
GOBP_HEPATOCYTE_DIFFERENTIATION	GOBP_HEPATOCYTE_DIFFERENTIATION	15	-0.64821	-1.36686	0.0831601	0.31634	1	450	tags=33%, list=3%, signal=34%
GOBP_NUCLEOTIDE_SUGAR_METABOLIC_PROCESS	GOBP_NUCLEOTIDE_SUGAR_METABOLIC_PROCESS	35	-0.364362	-1.36545	0.132114	0.318033	1	3179	tags=37%, list=21%, signal=47%
GOBP_RNA_CATABOLIC_PROCESS	GOBP_RNA_CATABOLIC_PROCESS	360	-0.206075	-1.36493	0.131313	0.318218	1	4170	tags=28%, list=27%, signal=38%
GOBP_POSITIVE_REGULATION_OF_MRNA_PROCESSING	GOBP_POSITIVE_REGULATION_OF_MRNA_PROCESSING	32	-0.416701	-1.36273	0.130165	0.321317	1	4119	tags=44%, list=27%, signal=60%
GOBP_CELL_CYCLE_G1_S_PHASE_TRANSITION	GOBP_CELL_CYCLE_G1_S_PHASE_TRANSITION	250	-0.36686	-1.36194	0.136364	0.321933	1	1901	tags=23%, list=12%, signal=26%
GOBP_INTRA_S_DNA_DAMAGE_CHECKPOINT	GOBP_INTRA_S_DNA_DAMAGE_CHECKPOINT	16	-0.554295	-1.36167	0.150101	0.321592	1	2630	tags=44%, list=17%, signal=53%
GOMF_TRANSLATION_INITIATION_FACTOR_ACTIVITY	GOMF_TRANSLATION_INITIATION_FACTOR_ACTIVITY	46	-0.316797	-1.36138	0.129412	0.321303	1	3660	tags=28%, list=24%, signal=37%
GOCC_CLEAVAGE_FURROW	GOCC_CLEAVAGE_FURROW	47	-0.387684	-1.35884	0.115385	0.324776	1	1240	tags=19%, list=8%, signal=21%
GOBP_TRNA_MODIFICATION	GOBP_TRNA_MODIFICATION	69	-0.353755	-1.3587	0.176015	0.324243	1	5099	tags=51%, list=33%, signal=76%
GOMF_SINGLE_STRANDED_DNA_BINDING	GOMF_SINGLE_STRANDED_DNA_BINDING	95	-0.396081	-1.3581	0.191753	0.324537	1	2962	tags=29%, list=19%, signal=36%
GOMF_EXORIBONUCLEASE_ACTIVITY	GOMF_EXORIBONUCLEASE_ACTIVITY	37	-0.332929	-1.35778	0.131373	0.32433	1	3785	tags=35%, list=25%, signal=47%
GOBP_CYTOCHROME_COMPLEX_ASSEMBLY	GOBP_CYTOCHROME_COMPLEX_ASSEMBLY	20	-0.391573	-1.35625	0.169922	0.326129	1	4362	tags=55%, list=28%, signal=77%
GOBP_IRE1_MEDIATED_UNFOLDED_PROTEIN_RESPONSE	GOBP_IRE1_MEDIATED_UNFOLDED_PROTEIN_RESPONSE	60	-0.334199	-1.35355	0.183673	0.330115	1	3344	tags=32%, list=22%, signal=40%
GOCC_CONDENSED_NUCLEAR_CHROMOSOME	GOCC_CONDENSED_NUCLEAR_CHROMOSOME	76	-0.535219	-1.35193	0.119433	0.332252	1	2484	tags=37%, list=16%, signal=44%
GOCC_CYTOSOLIC_RIBOSOME	GOCC_CYTOSOLIC_RIBOSOME	91	-0.287046	-1.35111	0.189555	0.332944	1	3415	tags=16%, list=22%, signal=21%
GOBP_SIGNAL_TRANSDUCTION_IN_RESPONSE_TO_DNA_DAMAGE	GOBP_SIGNAL_TRANSDUCTION_IN_RESPONSE_TO_DNA_DAMAGE	120	-0.380099	-1.34805	0.173824	0.337612	1	1671	tags=18%, list=11%, signal=19%
GOBP_ESTABLISHMENT_OF_MITOTIC_SPINDLE_ORIENTATION	GOBP_ESTABLISHMENT_OF_MITOTIC_SPINDLE_ORIENTATION	25	-0.455686	-1.348	0.144654	0.33694	1	872	tags=16%, list=6%, signal=17%
GOBP_RNA_POLYADENYLATION	GOBP_RNA_POLYADENYLATION	41	-0.315773	-1.34622	0.149068	0.339294	1	4530	tags=46%, list=29%, signal=66%
GOBP_OXIDATIVE_PHOSPHORYLATION	GOBP_OXIDATIVE_PHOSPHORYLATION	103	-0.310996	-1.34251	0.213147	0.345113	1	4320	tags=41%, list=28%, signal=56%
GOBP_CHAPERONE_MEDIATED_PROTEIN_COMPLEX_ASSEMBLY	GOBP_CHAPERONE_MEDIATED_PROTEIN_COMPLEX_ASSEMBLY	20	-0.419862	-1.34187	0.156627	0.345452	1	2434	tags=40%, list=16%, signal=47%
GOBP_CHROMATIN_ASSEMBLY_OR_DISASSEMBLY	GOBP_CHROMATIN_ASSEMBLY_OR_DISASSEMBLY	130	-0.345487	-1.33964	0.180124	0.348759	1	1294	tags=16%, list=8%, signal=17%
GOBP_SPLICEOSOMAL_COMPLEX_ASSEMBLY	GOBP_SPLICEOSOMAL_COMPLEX_ASSEMBLY	51	-0.362995	-1.33923	0.173307	0.348704	1	3235	tags=33%, list=21%, signal=42%
GOBP_ESTABLISHMENT_OF_SPINDLE_ORIENTATION	GOBP_ESTABLISHMENT_OF_SPINDLE_ORIENTATION	31	-0.417671	-1.33611	0.154959	0.353362	1	872	tags=13%, list=6%, signal=14%
GOBP_KERATINIZATION	GOBP_KERATINIZATION	132	-0.506165	-1.33558	0.0891089	0.353489	1	2024	tags=31%, list=13%, signal=35%
GOBP_POSITIVE_REGULATION_OF_G_PROTEIN_COUPLED_RECEPTOR_SIGNALING_PATHWAY	GOBP_POSITIVE_REGULATION_OF_G_PROTEIN_COUPLED_RECEPTOR_SIGNALING_PATHWAY	21	-0.584928	-1.33492	0.132505	0.353849	1	1551	tags=33%, list=10%, signal=37%
GOMF_OXIDOREDUCTASE_ACTIVITY_ACTING_ON_THE_ALDEHYDE_OR_OXO_GROUP_OF_DONORS_NAD_OR_NADP_AS_ACCEPTOR	GOMF_OXIDOREDUCTASE_ACTIVITY_ACTING_ON_THE_ALDEHYDE_OR_OXO_GROUP_OF_DONORS_NAD_OR_NADP_AS_ACCEPTOR	36	-0.511485	-1.33426	0.151277	0.354223	1	1382	tags=25%, list=9%, signal=27%
GOMF_ENDORIBONUCLEASE_ACTIVITY	GOMF_ENDORIBONUCLEASE_ACTIVITY	52	-0.355401	-1.33408	0.102249	0.353763	1	3872	tags=44%, list=25%, signal=59%
GOBP_MITOCHONDRIAL_RESPIRATORY_CHAIN_COMPLEX_ASSEMBLY	GOBP_MITOCHONDRIAL_RESPIRATORY_CHAIN_COMPLEX_ASSEMBLY	72	-0.333959	-1.33391	0.220729	0.353266	1	5064	tags=50%, list=33%, signal=74%
GOMF_EXONUCLEASE_ACTIVITY	GOMF_EXONUCLEASE_ACTIVITY	72	-0.329156	-1.33369	0.146435	0.352937	1	3827	tags=38%, list=25%, signal=50%
GOBP_PROTEIN_TRANSMEMBRANE_TRANSPORT	GOBP_PROTEIN_TRANSMEMBRANE_TRANSPORT	53	-0.313257	-1.33264	0.153996	0.354033	1	4687	tags=49%, list=31%, signal=70%
GOBP_CENTRIOLE_ASSEMBLY	GOBP_CENTRIOLE_ASSEMBLY	41	-0.445005	-1.33223	0.198	0.353991	1	2334	tags=32%, list=15%, signal=37%
GOBP_POSITIVE_REGULATION_OF_CYTOKINESIS	GOBP_POSITIVE_REGULATION_OF_CYTOKINESIS	35	-0.473918	-1.33196	0.158859	0.353666	1	1302	tags=20%, list=8%, signal=22%
GOBP_RNA_METHYLATION	GOBP_RNA_METHYLATION	60	-0.311118	-1.33186	0.186275	0.353087	1	5090	tags=43%, list=33%, signal=65%
GOMF_ATPASE_REGULATOR_ACTIVITY	GOMF_ATPASE_REGULATOR_ACTIVITY	42	-0.337263	-1.3313	0.111588	0.353349	1	2074	tags=24%, list=14%, signal=27%
GOCC_SPLICEOSOMAL_COMPLEX	GOCC_SPLICEOSOMAL_COMPLEX	167	-0.256892	-1.33078	0.20284	0.353489	1	3728	tags=22%, list=24%, signal=29%
GOCC_CHROMOSOME_TELOMERIC_REGION	GOCC_CHROMOSOME_TELOMERIC_REGION	124	-0.347816	-1.32863	0.205179	0.356633	1	4258	tags=37%, list=28%, signal=51%
GOCC_NURD_COMPLEX	GOCC_NURD_COMPLEX	15	-0.404578	-1.32775	0.15748	0.3575	1	4220	tags=33%, list=27%, signal=46%
GOMF_CIS_TRANS_ISOMERASE_ACTIVITY	GOMF_CIS_TRANS_ISOMERASE_ACTIVITY	32	-0.3612	-1.32764	0.144033	0.356954	1	3680	tags=34%, list=24%, signal=45%
GOBP_RESPONSE_TO_FOOD	GOBP_RESPONSE_TO_FOOD	33	-0.465374	-1.3251	0.115079	0.360768	1	1679	tags=21%, list=11%, signal=24%
GOBP_CELL_DIFFERENTIATION_INVOLVED_IN_EMBRYONIC_PLACENTA_DEVELOPMENT	GOBP_CELL_DIFFERENTIATION_INVOLVED_IN_EMBRYONIC_PLACENTA_DEVELOPMENT	23	-0.565285	-1.32419	0.138085	0.361593	1	2024	tags=48%, list=13%, signal=55%
GOBP_DNA_BIOSYNTHETIC_PROCESS	GOBP_DNA_BIOSYNTHETIC_PROCESS	172	-0.293434	-1.32395	0.145455	0.361285	1	2405	tags=22%, list=16%, signal=26%
GOBP_TRANSCRIPTION_COUPLED_NUCLEOTIDE_EXCISION_REPAIR	GOBP_TRANSCRIPTION_COUPLED_NUCLEOTIDE_EXCISION_REPAIR	69	-0.311367	-1.3183	0.199584	0.370965	1	3953	tags=35%, list=26%, signal=47%
[truncated: 1,582 more rows]
